# Supplementary material for: Regional Variation of the CD4 and CD8 T Cell Epitopes Conserved in Circulating Dengue Viruses and Shared with Potential Vaccine Candidates
Source: MDPI journal article supplement (doi:10.3390/v16050730), 2024-05-05
Supplement: s1 [file s1]

## **Supplementary material for**

**Regional variation of the CD4 and CD8 T cell epitopes conserved in circulating dengue viruses and shared with potential vaccine candidates.**

Yadya M. Chawla<sup>1†</sup>, Prashant Bajpai<sup>1†</sup>, Keshav Saini<sup>1</sup>, Elluri Seetharami Reddy<sup>1,2</sup>, Ashok Kumar Patel<sup>2</sup> Kaja Murali-Krishna<sup>1,3,4,\*</sup> Anmol Chande<sup>1\*</sup>



**Supplementary Table S1. Details of the individual CD4 and CD8 T cell epitopes published in the literature.** Detailed information for individual experimentally characterized dengue specific CD4 T cell epitopes and CD8 T cell epitopes that are retrieved from literature. Epitopes are organized into eight categories: DENV-1 specific CD4 epitopes, DENV-2 specific CD4 epitopes, DENV-3 specific CD4 epitopes, DENV-4 specific CD4 epitopes, DENV-1 specific CD8 epitopes, DENV-2 specific CD8 epitopes, DENV-3 specific CD8 epitopes, DENV-4 specific CD8 epitopes. For each epitope, individual columns represent sequence ID, sequence, dengue protein to which the epitope belongs to, start and end amino acid positions of the epitope sequence in the dengue polyprotein, HLA restriction, and functional assays such as IFN- $\gamma$  Enzyme Linked ImmunoSpot assay (ELISPOT), intracellular IFN- $\gamma$  cytokine staining assay (ICC) or MHC tetramer assays used to characterize the epitopes.



CD4 DENV-1 Epitopes

| Epitope_ID | AminoAcid_Seq      | Protein_Name | Start | End | Allele                    | Serotype       | Method/Technique | Assay Group  | Qualitative Measure |
|------------|--------------------|--------------|-------|-----|---------------------------|----------------|------------------|--------------|---------------------|
| 1067569    | LARWGSFKKNGAIKV    | C            | 66    | 80  | HLA-DRB1*07:01            | Dengue virus 1 | ELISPOT          | IFNg release | Positive-Low        |
| 195113     | AFILRFLAIPPTAGIL   | C            | 30    | 44  | HLA-DRB1*01:01            | Dengue virus 1 | ELISPOT          | IFNg release | Positive            |
| 195117     | AGILARWSSFKKNGA    | C            | 51    | 65  | HLA-DRB1*15:01            | Dengue virus 1 | ELISPOT          | IFNg release | Positive            |
| 195246     | EISNMLNIMNRRKRT    | C            | 87    | 101 | HLA-DRB1*13:01            | Dengue virus 1 | ELISPOT          | IFNg release | Positive            |
| 195299     | FIAFILRFLAIPPTAG   | C            | 28    | 42  | HLA-DRB1*01:01            | Dengue virus 1 | ELISPOT          | IFNg release | Positive            |
| 195314     | FNMLKRARNRVSTGS    | C            | 1     | 15  | HLA-DRB1*08:02            | Dengue virus 1 | ELISPOT          | IFNg release | Positive            |
| 195315     | FNMLKRARNRVSTVS    | C            | 13    | 27  | HLA-DRB1*08:02            | Dengue virus 1 | ELISPOT          | IFNg release | Positive            |
| 195468     | IAFLRFLAIPPTAGI    | C            | 29    | 43  | HLA-DRB1*01:01            | Dengue virus 1 | ELISPOT          | IFNg release | Positive            |
| 195498     | IKVLRGFKKEISNML    | C            | 78    | 92  | HLA-DRB1*04:01            | Dengue virus 1 | ELISPOT          | IFNg release | Positive            |
| 195535     | ISSMLNIMNRRKRSV    | C            | 88    | 102 | HLA-DRB1*08:02            | Dengue virus 1 | ELISPOT          | IFNg release | Positive            |
| 195540     | ISSMLNIMNRRKRSV    | C            | 76    | 90  | HLA-DRB1*14:02            | Dengue virus 1 | ELISPOT          | IFNg release | Positive            |
| 195557     | KEISNMLNIMNRRKR    | C            | 86    | 100 | HLA-DRB1*13:01            | Dengue virus 1 | ELISPOT          | IFNg release | Positive            |
| 195560     | KEVSNMLNIMNRRKR    | C            | 86    | 100 | HLA-DRB1*13:01            | Dengue virus 1 | ELISPOT          | IFNg release | Positive            |
| 195586     | KRSVTMLMLPTAL      | C            | 87    | 101 | HLA-DRB1*01:01            | Dengue virus 1 | ELISPOT          | IFNg release | Positive            |
| 195681     | LMLLPTALFAHLTTR    | C            | 94    | 108 | HLA-DRB1*04:01            | Dengue virus 1 | ELISPOT          | IFNg release | Positive            |
| 195761     | MLNIMNRRKRSVTML    | C            | 69    | 83  | HLA-DRB1*08:02            | Dengue virus 1 | ELISPOT          | IFNg release | Positive            |
| 195805     | NMLNIMNRRKRSVTM    | C            | 90    | 104 | HLA-DRB1*11:01            | Dengue virus 1 | ELISPOT          | IFNg release | Positive            |
| 195883     | RGFKKEISNMLNIMN    | C            | 82    | 96  | HLA-DRB1*04:01            | Dengue virus 1 | ELISPOT          | IFNg release | Positive            |
| 195884     | RGFKKEISNMLSIMN    | C            | 82    | 96  | HLA-DRB1*04:01            | Dengue virus 1 | ELISPOT          | IFNg release | Positive            |
| 195885     | RGFKKEISSMLNIMN    | C            | 60    | 74  | HLA-DRB1*04:01            | Dengue virus 1 | ELISPOT          | IFNg release | Positive            |
| 195904     | RPSFNMLKRARNRV     | C            | 10    | 24  | HLA-DRB1*11:01            | Dengue virus 1 | ELISPOT          | IFNg release | Positive            |
| 195944     | SFNMLKRARNRVSTG    | C            | 12    | 26  | HLA-DRB1*11:01            | Dengue virus 1 | ELISPOT          | IFNg release | Positive            |
| 196043     | TGRPSFNMLKRARNR    | C            | 8     | 22  | HLA-DRB1*11:01            | Dengue virus 1 | ELISPOT          | IFNg release | Positive            |
| 196146     | VLRGFKKEISNMLNI    | C            | 80    | 94  | HLA-DRB1*04:01            | Dengue virus 1 | ELISPOT          | IFNg release | Positive            |
| 196151     | VMAFIARFLAIP       | C            | 25    | 39  | HLA-DRB1*11:01            | Dengue virus 1 | ELISPOT          | IFNg release | Positive            |
| 196188     | VSVLFMLLPTALAFH    | C            | 102   | 116 | HLA-DRB1*01:01            | Dengue virus 1 | ELISPOT          | IFNg release | Positive            |
| 196195     | VTMLFMLLPTALAFH    | C            | 102   | 116 | HLA-DRB1*04:01            | Dengue virus 1 | ELISPOT          | IFNg release | Positive            |
| 196196     | VTMLLMLLPTALAFH    | C            | 90    | 104 | HLA-DRB1*04:01            | Dengue virus 1 | ELISPOT          | IFNg release | Positive            |
| 39096      | LRGFKKEISNML       | C            | 81    | 92  | HLA-DPw4                  | Dengue virus 1 | ICS              | TNF release  | Positive            |
| 539043     | AFIAFLRFLAIPPTA    | C            | 27    | 41  | HLA-DRB1*12:02            | Dengue virus 1 | ELISPOT          | IFNg release | Positive            |
| 539048     | AFMAFLRFLAIPPTA    | C            | 27    | 41  | HLA-DRB1*15:02            | Dengue virus 1 | ELISPOT          | IFNg release | Positive            |
| 539257     | FKKEISNMLNIMNRR    | C            | 84    | 98  | HLA-DRB1*04:03            | Dengue virus 1 | ELISPOT          | IFNg release | Positive            |
| 539258     | FKKEISSMLNIMNRR    | C            | 62    | 76  | HLA-DRB1*10:01            | Dengue virus 1 | ELISPOT          | IFNg release | Positive            |
| 539259     | FKKNGAIKVLRGFKK    | C            | 50    | 64  | HLA-DRB1*08:03            | Dengue virus 1 | ELISPOT          | IFNg release | Positive            |
| 539278     | GAIKVLRGFKKEISN    | C            | 76    | 90  | HLA-DRB1*12:02            | Dengue virus 1 | ELISPOT          | IFNg release | Positive            |
| 539459     | KEISSMLNIMNRRKR    | C            | 64    | 78  | HLA-DRB1*14:04            | Dengue virus 1 | ELISPOT          | IFNg release | Positive            |
| 539475     | KKEISSMLNIMNRRKR   | C            | 63    | 77  | HLA-DRB1*14:04            | Dengue virus 1 | ELISPOT          | IFNg release | Positive            |
| 539495     | KNGAIKVLRGFKKEI    | C            | 52    | 66  | HLA-DRB1*12:02            | Dengue virus 1 | ELISPOT          | IFNg release | Positive            |
| 539613     | FLRFLAIPPTAGILAR   | C            | 32    | 46  | HLA-DRB1*04:03            | Dengue virus 1 | ELISPOT          | IFNg release | Positive            |
| 539616     | LRGFKKEISNMLNIM    | C            | 81    | 95  | HLA-DRB1*10:01            | Dengue virus 1 | ELISPOT          | IFNg release | Positive            |
| 539617     | LRGFKKEISSMLNIM    | C            | 59    | 73  | HLA-DRB1*13:01            | Dengue virus 1 | ELISPOT          | IFNg release | Positive            |
| 539681     | MLNIRNRRKRSVTML    | C            | 91    | 105 | HLA-DRB1*13:01            | Dengue virus 1 | ELISPOT          | IFNg release | Positive            |
| 539711     | NGAIKVLRGFKKEIS    | C            | 53    | 67  | HLA-DRB1*13:01            | Dengue virus 1 | ELISPOT          | IFNg release | Positive            |
| 539780     | PMKLVMAFIARFL      | C            | 21    | 35  | HLA-DRB1*13:01            | Dengue virus 1 | ELISPOT          | IFNg release | Positive            |
| 539785     | PSFNMLKRARNRVST    | C            | 11    | 25  | HLA-DRB1*10:01            | Dengue virus 1 | ELISPOT          | IFNg release | Positive            |
| 539816     | QPSFNMLKRARNRV     | C            | 10    | 24  | HLA-DRB1*08:03            | Dengue virus 1 | ELISPOT          | IFNg release | Positive            |
| 539866     | RPSFNMLKVRNRVS     | C            | 10    | 24  | HLA-DRB1*08:03            | Dengue virus 1 | ELISPOT          | IFNg release | Positive            |
| 540059     | VLRGFKKEISSMLNI    | C            | 68    | 82  | HLA-DRB1*04:07            | Dengue virus 1 | ELISPOT          | IFNg release | Positive            |
| 540117     | WGSFKKNGAIKVLRG    | C            | 47    | 61  | HLA-DRB1*09:01            | Dengue virus 1 | ELISPOT          | IFNg release | Positive            |
| 738927     | FLRFLAIPPTAGILA    | C            | 41    | 55  | HLA-DRB1*14:02            | Dengue virus 1 | ELISPOT          | IFNg release | Positive            |
| 740331     | SNMLNIMNRRKRSVT    | C            | 89    | 103 | HLA-DRB1*14:02            | Dengue virus 1 | ELISPOT          | IFNg release | Positive            |
| 867523     | KVLRGFKKEISNMLN    | C            | 79    | 93  | HLA-DRB3*02:02            | Dengue virus 1 | ELISPOT          | IFNg release | Positive            |
| 95107      | KLVMAFIARFL        | C            | 45    | 57  | HLA-DPw4                  | Dengue virus 1 | ELISPOT          | IFNg release | Positive            |
| 195368     | GIIFILLMLVTPSMA    | PreM         | 266   | 280 | HLA-DRB1*01:01            | Dengue virus 1 | ELISPOT          | IFNg release | Positive            |
| 195562     | KGIIFILLMLVTPSM    | PreM         | 265   | 279 | HLA-DRB1*08:02            | Dengue virus 1 | ELISPOT          | IFNg release | Positive            |
| 195589     | KSLLFKTSVGVNMCT    | PreM         | 135   | 149 | HLA-DRB1*07:01            | Dengue virus 1 | ELISPOT          | IFNg release | Positive            |
| 195831     | PGFTVIALFLAHAIG    | PreM         | 245   | 259 | HLA-DRB1*15:01            | Dengue virus 1 | ELISPOT          | IFNg release | Positive            |
| 195887     | RGKSLLFKTSAGVNM    | PreM         | 111   | 125 | HLA-DRB1*07:01            | Dengue virus 1 | ELISPOT          | IFNg release | Positive            |
| 196085     | TVIALFLAHAGTSI     | PreM         | 248   | 262 | HLA-DRB1*07:01            | Dengue virus 1 | ELISPOT          | IFNg release | Positive            |
| 539516     | KSLLFKTSAGVNMCT    | PreM         | 123   | 137 | HLA-DRB1*09:01            | Dengue virus 1 | ELISPOT          | IFNg release | Positive            |
| 867083     | HPGFTVIALFLAHAI    | PreM         | 244   | 258 | HLA-DPB1*02:01            | Dengue virus 1 | ELISPOT          | IFNg release | Positive            |
| 867912     | LRHPGFTVIALFLAH    | PreM         | 242   | 256 | HLA-DPB1*02:01            | Dengue virus 1 | ELISPOT          | IFNg release | Positive            |
| 869062     | SVGVNMCTLIAMDLG    | PreM         | 142   | 156 | HLA-DQA1*01:02/DQB1*06:02 | Dengue virus 1 | ELISPOT          | IFNg release | Positive            |
| 195145     | AKFKCVTKLEGKIVQ    | E            | 117   | 131 | HLA-DRB1*11:01            | Dengue virus 1 | ELISPOT          | IFNg release | Positive            |
| 195216     | DIELLKTEVTNPAYL    | E            | 37    | 51  | HLA-DRB1*04:01            | Dengue virus 1 | ELISPOT          | IFNg release | Positive            |
| 195260     | ENLKYSVIVTVHTGD    | E            | 128   | 142 | HLA-DRB1*07:01            | Dengue virus 1 | ELISPOT          | IFNg release | Positive            |
| 195359     | GGFLTSVGKLIHQVF    | E            | 706   | 720 | HLA-DRB1*11:01            | Dengue virus 1 | ELISPOT          | IFNg release | Positive            |
| 195361     | GGVFTSVGKLVHQIF    | E            | 426   | 440 | HLA-DRB1*11:01            | Dengue virus 1 | ELISPOT          | IFNg release | Positive            |
| 195362     | GGVFTSVGKLVHQVF    | E            | 426   | 440 | HLA-DRB1*11:01            | Dengue virus 1 | ELISPOT          | IFNg release | Positive            |
| 195477     | IELLKTEVTNPAYLR    | E            | 38    | 52  | HLA-DRB1*04:01            | Dengue virus 1 | ELISPOT          | IFNg release | Positive            |
| 195484     | IGGLFTSVGKLIHQV    | E            | 705   | 719 | HLA-DRB1*07:01            | Dengue virus 1 | ELISPOT          | IFNg release | Positive            |
| 195547     | IVQYENLKYSVIVTV    | E            | 124   | 138 | HLA-DRB1*15:02            | Dengue virus 1 | ELISPOT          | IFNg release | Positive            |
| 195623     | LDIELLKTEVTNPAY    | E            | 36    | 50  | HLA-DRB1*04:01            | Dengue virus 1 | ELISPOT          | IFNg release | Positive            |
| 195646     | LITANPIVTDKEKPV    | E            | 346   | 360 | HLA-DRB1*03:01            | Dengue virus 1 | ELISPOT          | IFNg release | Positive            |
| 195814     | NRQDLLVTFKTAHAK    | E            | 227   | 241 | HLA-DRB1*04:01            | Dengue virus 1 | ELISPOT          | IFNg release | Positive            |
| 195874     | QYENLKYSVIVTVHT    | E            | 126   | 140 | HLA-DRB1*07:01            | Dengue virus 1 | ELISPOT          | IFNg release | Positive            |
| 196053     | TLDIELLKTEVTNPA    | E            | 35    | 49  | HLA-DRB1*04:01            | Dengue virus 1 | ELISPOT          | IFNg release | Positive            |
| 539169     | DLLVTFKTAHAKQEQ    | E            | 230   | 244 | HLA-DRB1*14:04            | Dengue virus 1 | ELISPOT          | IFNg release | Positive            |
| 539369     | GVSWTMKIGIGILLT    | E            | 445   | 459 | HLA-DRB1*15:02            | Dengue virus 1 | ELISPOT          | IFNg release | Positive            |
| 539378     | HAKKQEVVVLGSQEGAMH | E            | 239   | 256 | HLA class II              | Dengue virus 1 | ICS              | IFNg release | Positive            |
| 539593     | LLVTFKTAHAKKQEV    | E            | 236   | 250 | HLA-DRB1*14:02            | Dengue virus 1 | ELISPOT          | IFNg release | Positive            |
| 539670     | MKIGILLTWLGLN      | E            | 450   | 464 | HLA-DRB1*15:06            | Dengue virus 1 | ELISPOT          | IFNg release | Positive            |
| 539800     | QDLLVTFKTAHAKKQ    | E            | 229   | 243 | HLA-DRB1*09:01            | Dengue virus 1 | ELISPOT          | IFNg release | Positive            |
| 539840     | REDLLVTFKTAHAKK    | E            | 513   | 527 | HLA-DRB1*04:03            | Dengue virus 1 | ELISPOT          | IFNg release | Positive            |
| 539854     | RKDLLVTFKTAHAKK    | E            | 513   | 527 | HLA-DRB1*04:03            | Dengue virus 1 | ELISPOT          | IFNg release | Positive            |
| 539869     | RQDLLVTFKTAHAKK    | E            | 228   | 242 | HLA-DRB1*08:03            | Dengue virus 1 | ELISPOT          | IFNg release | Positive            |



|        |                          |      |      |      |                           |                |         |              |          |
|--------|--------------------------|------|------|------|---------------------------|----------------|---------|--------------|----------|
| 540052 | VLGSGQEGAMHTALTGA        | E    | 247  | 262  | HLA class II              | Dengue virus 1 | ICS     | IFNg release | Positive |
| 540104 | VVLGSGQEGAMHTALTG        | E    | 245  | 261  | HLA class II              | Dengue virus 1 | ICS     | IFNg release | Positive |
| 741745 | MRCVGIGNRDFVEGLSGATW     | E    | 281  | 300  | HLA class II              | Dengue virus 1 | ELISPOT | IFNg release | Positive |
| 867045 | HAKKQDEAVLGSQEG          | E    | 244  | 258  | HLA-DQA1*03:01/DQB1*03:02 | Dengue virus 1 | ELISPOT | IFNg release | Positive |
| 867101 | HTALTGATEIQTSGT          | E    | 541  | 555  | HLA-DQA1*01:02/DQB1*06:02 | Dengue virus 1 | ELISPOT | IFNg release | Positive |
| 867378 | KCRLKMDKLT.LKGMS         | E    | 564  | 578  | HLA-DRB3*02:02            | Dengue virus 1 | ELISPOT | IFNg release | Positive |
| 868013 | LVHKQWFLDLP.PWT          | E    | 487  | 501  | HLA-DQA1*01:01/DQB1*05:01 | Dengue virus 1 | ELISPOT | IFNg release | Positive |
| 869085 | SYIVIGAGKKALKLS          | E    | 376  | 390  | HLA-DRB5*01:01            | Dengue virus 1 | ELISPOT | IFNg release | Positive |
| 869690 | WLAHKQWFLDLP.PW          | E    | 206  | 220  | HLA-DQA1*01:01/DQB1*05:01 | Dengue virus 1 | ELISPOT | IFNg release | Positive |
| 869691 | WLVHKQWFLDLP.PW          | E    | 486  | 500  | HLA-DQA1*01:01/DQB1*05:01 | Dengue virus 1 | ELISPOT | IFNg release | Positive |
| 95154  | SSIGKMFEATARG            | E    | 396  | 408  | HLA-DQ8                   | Dengue virus 1 | ELISPOT | IFNg release | Positive |
| 132583 | QYKFQADSPKRLSAA          | NS1  | 31   | 45   | HLA-DRB1*03:01            | Dengue virus 1 | ELISPOT | IFNg release | Positive |
| 195579 | KNETWK.LARASFIEV         | NS1  | 206  | 220  | HLA-DRB1*07:01            | Dengue virus 1 | ELISPOT | IFNg release | Positive |
| 195684 | LNHILLENDIKFTVV          | NS1  | 850  | 864  | HLA-DRB1*03:01            | Dengue virus 1 | ELISPOT | IFNg release | Positive |
| 195685 | LNHILLENDMKFTVV          | NS1  | 75   | 89   | HLA-DRB1*03:01            | Dengue virus 1 | ELISPOT | IFNg release | Positive |
| 195690 | LNWILLENDMKFTVV          | NS1  | 850  | 864  | HLA-DRB1*03:01            | Dengue virus 1 | ELISPOT | IFNg release | Positive |
| 195784 | NETWK.LARASFIEVK         | NS1  | 207  | 221  | HLA-DRB1*07:01            | Dengue virus 1 | ELISPOT | IFNg release | Positive |
| 195785 | NETWK.LTRASFIEVK         | NS1  | 982  | 996  | HLA-DRB1*07:01            | Dengue virus 1 | ELISPOT | IFNg release | Positive |
| 539401 | IESEKNETWK.LARASFI       | NS1  | 202  | 218  | HLA class II              | Dengue virus 1 | ICS     | IFNg release | Positive |
| 591686 | KFTVVVDVSGILAQ           | NS1  | 860  | 874  | HLA-DRB1*03:01            | Dengue virus 1 | ELISPOT | IFNg release | Positive |
| 738503 | ANGILAQGGK.MIRPQ         | NS1  | 868  | 882  | HLA-DRB1*14:06            | Dengue virus 1 | ELISPOT | IFNg release | Positive |
| 740562 | TWVGDDANGILAQQGK         | NS1  | 862  | 876  | HLA-DRB1*01:02            | Dengue virus 1 | ELISPOT | IFNg release | Positive |
| 866284 | DDQRAWNIWVEDYD           | NS1  | 181  | 195  | HLA-DQA1*01:01/DQB1*05:01 | Dengue virus 1 | ELISPOT | IFNg release | Positive |
| 866693 | FGIFTN.IWKL.RDS          | NS1  | 196  | 210  | HLA-DRB1*04:01            | Dengue virus 1 | ELISPOT | IFNg release | Positive |
| 867041 | HADMGYWIESEKNET          | NS1  | 231  | 245  | HLA-DQA1*01:01/DQB1*05:01 | Dengue virus 1 | ELISPOT | IFNg release | Positive |
| 867405 | KIIGADIQNTTFID           | NS1  | 897  | 911  | HLA-DRB1*04:02            | Dengue virus 1 | ELISPOT | IFNg release | Positive |
| 868492 | QISNEL.NYILLENDM         | NS1  | 845  | 859  | HLA-DRB1*01:01            | Dengue virus 1 | ELISPOT | IFNg release | Positive |
| 868574 | QRAWNIWVEDYDGG           | NS1  | 183  | 197  | HLA-DQA1*01:01/DQB1*05:01 | Dengue virus 1 | ELISPOT | IFNg release | Positive |
| 868630 | QYKFQADSPKRLSAA          | NS1  | 806  | 820  | HLA-DRB3*02:02            | Dengue virus 1 | ELISPOT | IFNg release | Positive |
| 869135 | TEQYKFQADSPKRLS          | NS1  | 65   | 79   | HLA-DRB5*01:01            | Dengue virus 1 | ELISPOT | IFNg release | Positive |
| 869721 | YGFGITN.IWKL.R           | NS1  | 194  | 208  | HLA-DRB1*02:01            | Dengue virus 1 | ELISPOT | IFNg release | Positive |
| 167816 | SLVASVELPNSLEELGDLAMGIMI | NS2a | 109  | 133  | HLA class II              | Dengue virus 1 | ELISPOT | IFNg release | Positive |
| 195162 | AMVLSIVSLFPLCLS          | NS2a | 1296 | 1310 | HLA-DRB1*15:01            | Dengue virus 1 | ELISPOT | IFNg release | Positive |
| 195196 | AWKTMAMALSIVSLF          | NS2a | 1291 | 1305 | HLA-DRB1*08:02            | Dengue virus 1 | ELISPOT | IFNg release | Positive |
| 195285 | FAVGLLFRRLTSREI          | NS2a | 1214 | 1228 | HLA-DRB1*11:01            | Dengue virus 1 | ELISPOT | IFNg release | Positive |
| 195286 | FAVGLLFRRLTSREV          | NS2a | 1214 | 1228 | HLA-DRB1*08:03            | Dengue virus 1 | ELISPOT | IFNg release | Positive |
| 195323 | FQSHQLWATLLSLTF          | NS2a | 1267 | 1281 | HLA-DRB1*04:02            | Dengue virus 1 | ELISPOT | IFNg release | Positive |
| 195389 | GLLFRRLTSREVL            | NS2a | 1217 | 1231 | HLA-DRB1*11:01            | Dengue virus 1 | ELISPOT | IFNg release | Positive |
| 195390 | GLLFRRLTSREILL           | NS2a | 1217 | 1231 | HLA-DRB1*07:01            | Dengue virus 1 | ELISPOT | IFNg release | Positive |
| 195391 | GLLFRRLTSREVL            | NS2a | 1217 | 1231 | HLA-DRB1*08:03            | Dengue virus 1 | ELISPOT | IFNg release | Positive |
| 195392 | GLLFRRLTSREVP            | NS2a | 1217 | 1231 | HLA-DRB1*10:01            | Dengue virus 1 | ELISPOT | IFNg release | Positive |
| 195422 | GT.LAVFLLIMGQLT          | NS2a | 1162 | 1176 | HLA-DRB1*01:01            | Dengue virus 1 | ELISPOT | IFNg release | Positive |
| 195423 | GT.LVFFLLIMGQLT          | NS2a | 1162 | 1176 | HLA-DRB1*15:01            | Dengue virus 1 | ELISPOT | IFNg release | Positive |
| 195595 | KTMAMVLSIVSLFPL          | NS2a | 1293 | 1307 | HLA-DRB1*03:01            | Dengue virus 1 | ELISPOT | IFNg release | Positive |
| 195613 | LAVFLLIMGQLTWN           | NS2a | 1164 | 1178 | HLA-DRB1*15:06            | Dengue virus 1 | ELISPOT | IFNg release | Positive |
| 195614 | LAVGLLFRRLTSREV          | NS2a | 1214 | 1228 | HLA-DRB1*11:01            | Dengue virus 1 | ELISPOT | IFNg release | Positive |
| 195665 | LLTIGLSLVASVEL           | NS2a | 1229 | 1243 | HLA-DRB1*07:01            | Dengue virus 1 | ELISPOT | IFNg release | Positive |
| 195670 | LLSLTFIKT.TFSLHY         | NS2a | 1276 | 1290 | HLA-DRB1*07:01            | Dengue virus 1 | ELISPOT | IFNg release | Positive |
| 195674 | LLTIGLSLVASVELP          | NS2a | 1230 | 1244 | HLA-DRB1*07:01            | Dengue virus 1 | ELISPOT | IFNg release | Positive |
| 195708 | LSIVSLFPLCLSTTS          | NS2a | 1299 | 1313 | HLA-DRB1*01:01            | Dengue virus 1 | ELISPOT | IFNg release | Positive |
| 195713 | LSLTFIRTSLSLDYA          | NS2a | 1277 | 1291 | HLA-DRB1*03:01            | Dengue virus 1 | ELISPOT | IFNg release | Positive |
| 195745 | MAMVLSIVSLFPLCL          | NS2a | 1295 | 1309 | HLA-DRB1*07:01            | Dengue virus 1 | ELISPOT | IFNg release | Positive |
| 195756 | MGLLFRRLTSREVL           | NS2a | 1216 | 1230 | HLA-DRB1*11:01            | Dengue virus 1 | ELISPOT | IFNg release | Positive |
| 195881 | REVLLLTGVL.SL.VAC        | NS2a | 1226 | 1240 | HLA-DRB1*07:01            | Dengue virus 1 | ELISPOT | IFNg release | Positive |
| 195959 | SILIEV.MRSRWSRK          | NS2a | 1143 | 1157 | HLA-DRB1*11:04            | Dengue virus 1 | ELISPOT | IFNg release | Positive |
| 195983 | SREVL.LTIGLSLVA          | NS2a | 1225 | 1239 | HLA-DRB1*15:01            | Dengue virus 1 | ELISPOT | IFNg release | Positive |
| 196216 | WKT.MAMVLSIVSLFP         | NS2a | 1292 | 1306 | HLA-DRB1*08:02            | Dengue virus 1 | ELISPOT | IFNg release | Positive |
| 539086 | AMGIM.LK.LL.TDFQS        | NS2a | 1255 | 1269 | HLA-DRB1*04:03            | Dengue virus 1 | ELISPOT | IFNg release | Positive |
| 539094 | ATFKMRP.MFAVGLLF         | NS2a | 1206 | 1220 | HLA-DRB1*01:02            | Dengue virus 1 | ELISPOT | IFNg release | Positive |
| 539205 | EEVMRSRWSRK.MLMT         | NS2a | 1147 | 1161 | HLA-DRB1*13:01            | Dengue virus 1 | ELISPOT | IFNg release | Positive |
| 539272 | FSLHYAWKTMAMVLS          | NS2a | 1286 | 1300 | HLA-DRB1*09:01            | Dengue virus 1 | ELISPOT | IFNg release | Positive |
| 539398 | IEEV.MRSRWSRK.ML         | NS2a | 1146 | 1160 | HLA-DRB1*13:01            | Dengue virus 1 | ELISPOT | IFNg release | Positive |
| 539517 | KTFSLHYAWKTMAM           | NS2a | 1283 | 1297 | HLA-DRB1*09:01            | Dengue virus 1 | ELISPOT | IFNg release | Positive |
| 539624 | LSLTFIKT.TLSLHYA         | NS2a | 1277 | 1291 | HLA-DRB1*14:04            | Dengue virus 1 | ELISPOT | IFNg release | Positive |
| 539625 | LSLTFIKT.TYSLHYA         | NS2a | 1277 | 1291 | HLA-DRB1*14:04            | Dengue virus 1 | ELISPOT | IFNg release | Positive |
| 539626 | LSLTFIRSTIPLVMA          | NS2a | 1275 | 1289 | HLA-DRB1*14:04            | Dengue virus 1 | ELISPOT | IFNg release | Positive |
| 539651 | L.VFLLIMGQLTWS           | NS2a | 1164 | 1178 | HLA-DRB1*15:06            | Dengue virus 1 | ELISPOT | IFNg release | Positive |
| 539657 | MALSIVSLFPLCLST          | NS2a | 1297 | 1311 | HLA-DRB1*15:06            | Dengue virus 1 | ELISPOT | IFNg release | Positive |
| 539679 | MLMTGT.LAVFLLIM          | NS2a | 1158 | 1172 | HLA-DRB1*15:06            | Dengue virus 1 | ELISPOT | IFNg release | Positive |
| 539680 | MLMTGT.LVVFLLIM          | NS2a | 1158 | 1172 | HLA-DRB1*15:06            | Dengue virus 1 | ELISPOT | IFNg release | Positive |
| 539888 | RWSRK.ML.MTGTLAVF        | NS2a | 1153 | 1167 | HLA-DRB1*04:03            | Dengue virus 1 | ELISPOT | IFNg release | Positive |
| 539912 | SLDYAWKTMAMALS           | NS2a | 1287 | 1301 | HLA-DRB1*09:01            | Dengue virus 1 | ELISPOT | IFNg release | Positive |
| 539913 | SLHYAWKTMAMVLSI          | NS2a | 1287 | 1301 | HLA-DRB1*09:01            | Dengue virus 1 | ELISPOT | IFNg release | Positive |
| 539918 | SLTFIKT.TLSLHAW          | NS2a | 1278 | 1292 | HLA-DRB1*14:04            | Dengue virus 1 | ELISPOT | IFNg release | Positive |
| 539970 | TFSLHYAWKTMAMVL          | NS2a | 1285 | 1299 | HLA-DRB1*14:06            | Dengue virus 1 | ELISPOT | IFNg release | Positive |
| 539974 | TGTL.VV.FLL.LT.GQL       | NS2a | 1161 | 1175 | HLA-DRB1*15:06            | Dengue virus 1 | ELISPOT | IFNg release | Positive |
| 540006 | TT.LSLT.FIRTSLSL         | NS2a | 1274 | 1288 | HLA-DRB1*12:02            | Dengue virus 1 | ELISPOT | IFNg release | Positive |
| 540038 | VGLLFRRLTSREVL           | NS2a | 1216 | 1230 | HLA-DRB1*08:03            | Dengue virus 1 | ELISPOT | IFNg release | Positive |
| 540155 | YLALMATFKMRP.MFA         | NS2a | 1201 | 1215 | HLA-DRB1*13:01            | Dengue virus 1 | ELISPOT | IFNg release | Positive |
| 591779 | TLAVF.LLLT.MGQLT         | NS2a | 36   | 50   | HLA-DRB1*11:01            | Dengue virus 1 | ELISPOT | IFNg release | Positive |
| 738553 | AVGLLFRRLTSREVL          | NS2a | 1215 | 1229 | HLA-DRB1*01:02            | Dengue virus 1 | ELISPOT | IFNg release | Positive |
| 738679 | DLIRLCIMVGANASD          | NS2a | 1179 | 1193 | HLA-DRB1*11:04            | Dengue virus 1 | ELISPOT | IFNg release | Positive |
| 739424 | LAVFLL.VMGQLTWN          | NS2a | 1164 | 1178 | HLA-DRB1*11:04            | Dengue virus 1 | ELISPOT | IFNg release | Positive |
| 739508 | LLCISIMIEV.MRSR          | NS2a | 1139 | 1153 | HLA-DRB1*11:04            | Dengue virus 1 | ELISPOT | IFNg release | Positive |
| 739578 | LSLTFIKT.TLSLHHA         | NS2a | 1277 | 1291 | HLA-DRB1*04:07            | Dengue virus 1 | ELISPOT | IFNg release | Positive |
| 866118 | AMALSIVSLFPLCLS          | NS2a | 1296 | 1310 | HLA-DRB1*04:01            | Dengue virus 1 | ELISPOT | IFNg release | Positive |
| 866767 | FQSYQLWATLLSLTF          | NS2a | 1267 | 1281 | HLA-DRB1*04:02            | Dengue virus 1 | ELISPOT | IFNg release | Positive |
| 866873 | GILAVFLLIMGQLT           | NS2a | 1162 | 1176 | HLA-DRB1*04:02            | Dengue virus 1 | ELISPOT | IFNg release | Positive |
| 867232 | ILK.LL.TDF.QSHQLWA       | NS2a | 1260 | 1274 | HLA-DRB1*01:01            | Dengue virus 1 | ELISPOT | IFNg release | Positive |
| 867997 | LTSREILL.TVGLSL          | NS2a | 1223 | 1237 | HLA-DRB1*04:02            | Dengue virus 1 | ELISPOT | IFNg release | Positive |



|         |                  |      |      |      |                           |                |                     |              |          |
|---------|------------------|------|------|------|---------------------------|----------------|---------------------|--------------|----------|
| 868098  | MGMGTTYLALMATFK  | NS2a | 456  | 470  | HLA-DRB5*01:01            | Dengue virus 1 | ELISPOT             | IFNg release | Positive |
| 868100  | MGQLTWNDLIRLCIM  | NS2a | 433  | 447  | HLA-DPB1*04:02            | Dengue virus 1 | ELISPOT             | IFNg release | Positive |
| 868553  | QPHQLWATLLSLTFV  | NS2a | 1268 | 1282 | HLA-DPB1*04:02            | Dengue virus 1 | ELISPOT             | IFNg release | Positive |
| 869103  | TDFQPHQLWTTLLSL  | NS2a | 1265 | 1279 | HLA-DPB1*04:02            | Dengue virus 1 | ELISPOT             | IFNg release | Positive |
| 195191  | AVGIVSILLSLLKN   | NS2b | 1355 | 1369 | HLA-DRB1*08:02            | Dengue virus 1 | ELISPOT             | IFNg release | Positive |
| 195228  | DTLTLLKATLLAVS   | NS2b | 1438 | 1452 | HLA-DRB1*08:02            | Dengue virus 1 | ELISPOT             | IFNg release | Positive |
| 195508  | ILVEVQDDGTMKID   | NS2b | 68   | 82   | HLA-DRB1*03:01            | Dengue virus 1 | ELISPOT             | IFNg release | Positive |
| 195510  | IMAVGIVSILLSLL   | NS2b | 1353 | 1367 | HLA-DRB1*07:01            | Dengue virus 1 | ELISPOT             | IFNg release | Positive |
| 195715  | LSLLKNDVPLAGPL   | NS2b | 1363 | 1377 | HLA-DRB1*03:01            | Dengue virus 1 | ELISPOT             | IFNg release | Positive |
| 195724  | LTILLKATLLAVSGV  | NS2b | 1440 | 1454 | HLA-DRB1*08:02            | Dengue virus 1 | ELISPOT             | IFNg release | Positive |
| 195878  | RDDTLTLLKATLLA   | NS2b | 1436 | 1450 | HLA-DRB1*12:02            | Dengue virus 1 | ELISPOT             | IFNg release | Positive |
| 195993  | SSLLKNDVPLAGPLI  | NS2b | 1364 | 1378 | HLA-DRB1*03:01            | Dengue virus 1 | ELISPOT             | IFNg release | Positive |
| 196111  | VEVQDDGTMKIDEE   | NS2b | 1421 | 1435 | HLA-DRB1*03:01            | Dengue virus 1 | ELISPOT             | IFNg release | Positive |
| 866200  | ATFLVWYFWQKKQR   | NS2b | 1461 | 1475 | HLA-DPB1*01:01            | Dengue virus 1 | ELISPOT             | IFNg release | Positive |
| 866201  | ATLVVWYFWQKKQR   | NS2b | 1461 | 1475 | HLA-DPB1*01:01            | Dengue virus 1 | ELISPOT             | IFNg release | Positive |
| 867359  | IVSILLSLLKNDVP   | NS2b | 1358 | 1372 | HLA-DPB1*04:02            | Dengue virus 1 | ELISPOT             | IFNg release | Positive |
| 867544  | LAPLIAGGMILIACY  | NS2b | 1373 | 1387 | HLA-DQA1*01:02/DQB1*06:02 | Dengue virus 1 | ELISPOT             | IFNg release | Positive |
| 1392180 | GKEIVDLMCHATFTM  | NS3  | 1730 | 1744 | HLA class II              | Dengue virus 1 | biological activity | activation   | Positive |
| 167826  | TSGYVSAIAQAKASQE | NS3  | 157  | 173  | HLA class II              | Dengue virus 1 | ELISPOT             | IFNg release | Positive |
| 195143  | AIVREAIKKRLRTL   | NS3  | 1682 | 1696 | HLA-DRB1*11:01            | Dengue virus 1 | ELISPOT             | IFNg release | Positive |
| 195163  | ANCLRNKNGKRVQLS  | NS3  | 1848 | 1862 | HLA-DRB1*13:01            | Dengue virus 1 | ELISPOT             | IFNg release | Positive |
| 195165  | ANFRADRVDPRLCL   | NS3  | 1891 | 1905 | HLA-DRB1*03:01            | Dengue virus 1 | ELISPOT             | IFNg release | Positive |
| 195201  | CHATFTMRLLSPPRV  | NS3  | 1737 | 1751 | HLA-DRB1*01:01            | Dengue virus 1 | ELISPOT             | IFNg release | Positive |
| 195242  | EKGIVGLYNGVVT    | NS3  | 1618 | 1632 | HLA-DRB1*15:01            | Dengue virus 1 | ELISPOT             | IFNg release | Positive |
| 195296  | FHTMWHVTRGAVLMY  | NS3  | 1521 | 1535 | HLA-DRB1*07:01            | Dengue virus 1 | ELISPOT             | IFNg release | Positive |
| 195338  | FTMRLLSPPRVPNYN  | NS3  | 1741 | 1755 | HLA-DRB1*01:01            | Dengue virus 1 | ELISPOT             | IFNg release | Positive |
| 195377  | GIYRILQRGLGRSQ   | NS3  | 1496 | 1510 | HLA-DRB1*11:01            | Dengue virus 1 | ELISPOT             | IFNg release | Positive |
| 195379  | GKIVGLYNGVVTSS   | NS3  | 1619 | 1633 | HLA-DRB1*15:01            | Dengue virus 1 | ELISPOT             | IFNg release | Positive |
| 195549  | IYRILQRGLGRSQV   | NS3  | 1497 | 1511 | HLA-DRB1*15:01            | Dengue virus 1 | ELISPOT             | IFNg release | Positive |
| 195585  | KRKLRTLILAPTRVV  | NS3  | 1689 | 1703 | HLA-DRB1*10:01            | Dengue virus 1 | ELISPOT             | IFNg release | Positive |
| 195622  | LDDGIYRIMQRGLLG  | NS3  | 1493 | 1507 | HLA-DRB1*11:01            | Dengue virus 1 | ELISPOT             | IFNg release | Positive |
| 195705  | RTLILAPTRVVASE   | NS3  | 1692 | 1706 | HLA-DRB1*08:02            | Dengue virus 1 | ELISPOT             | IFNg release | Positive |
| 195777  | NCLRNKNGKRVQLSR  | NS3  | 1849 | 1863 | HLA-DRB1*11:01            | Dengue virus 1 | ELISPOT             | IFNg release | Positive |
| 195778  | NDIANCLRNKNGKRV  | NS3  | 1845 | 1859 | HLA-DRB1*11:01            | Dengue virus 1 | ELISPOT             | IFNg release | Positive |
| 195896  | KRLRTLILAPTRVVA  | NS3  | 1690 | 1704 | HLA-DRB1*01:01            | Dengue virus 1 | ELISPOT             | IFNg release | Positive |
| 195914  | RTLILAPTRVVASEM  | NS3  | 1693 | 1707 | HLA-DRB1*10:01            | Dengue virus 1 | ELISPOT             | IFNg release | Positive |
| 196130  | VILKDGPERVILAGP  | NS3  | 1908 | 1922 | HLA-DRB1*03:01            | Dengue virus 1 | ELISPOT             | IFNg release | Positive |
| 196138  | VLDDGIYRILQRGLL  | NS3  | 1492 | 1506 | HLA-DRB1*11:01            | Dengue virus 1 | ELISPOT             | IFNg release | Positive |
| 196197  | VTRGAVLMYQGRLE   | NS3  | 1527 | 1541 | HLA-DRB1*15:01            | Dengue virus 1 | ELISPOT             | IFNg release | Positive |
| 24915   | HGTKEIVDLMCHATE  | NS3  | 251  | 265  | HLA-DPw2                  | Dengue virus 1 | ICS                 | IFNg release | Positive |
| 30397   | KEGERKKLRPRWLDA  | NS3  | 585  | 599  | HLA class II              | Dengue virus 1 | ICS                 | IFNg release | Positive |
| 45669   | NREGKIVGLYNGGVV  | NS3  | 141  | 155  | HLA-DRB1*15:01            | Dengue virus 1 | ICS                 | IFNg release | Positive |
| 49768   | PTRVVASEMAEALKG  | NS3  | 224  | 238  | HLA-DRB1*15:01            | Dengue virus 1 | ICS                 | TNF release  | Positive |
| 539022  | AAAFMTATPPGSVE   | NS3  | 1785 | 1799 | HLA-DRB1*04:03            | Dengue virus 1 | ELISPOT             | IFNg release | Positive |
| 539027  | AAIFMTATPPGSVEA  | NS3  | 1786 | 1800 | HLA-DRB1*10:01            | Dengue virus 1 | ELISPOT             | IFNg release | Positive |
| 539155  | DGIYRILQRGLLGRS  | NS3  | 1495 | 1509 | HLA-DRB1*12:02            | Dengue virus 1 | ELISPOT             | IFNg release | Positive |
| 539156  | DGIYRIMQRGLLGRS  | NS3  | 1495 | 1509 | HLA-DRB1*12:02            | Dengue virus 1 | ELISPOT             | IFNg release | Positive |
| 539171  | DLMCHATFTMRLLS   | NS3  | 1734 | 1748 | HLA-DRB1*13:01            | Dengue virus 1 | ELISPOT             | IFNg release | Positive |
| 539288  | GEAAAFMTATPPGS   | NS3  | 1783 | 1797 | HLA-DRB1*04:03            | Dengue virus 1 | ELISPOT             | IFNg release | Positive |
| 539309  | GIYRIMQRGLLGRSQ  | NS3  | 1496 | 1510 | HLA-DRB1*14:04            | Dengue virus 1 | ELISPOT             | IFNg release | Positive |
| 539485  | KLRTLILAPTRVVAS  | NS3  | 1691 | 1705 | HLA-DRB1*04:03            | Dengue virus 1 | ELISPOT             | IFNg release | Positive |
| 539543  | LDDGIYRILQRGLLG  | NS3  | 1493 | 1507 | HLA-DRB1*12:02            | Dengue virus 1 | ELISPOT             | IFNg release | Positive |
| 539579  | LKGMPIRYQTAVKS   | NS3  | 1711 | 1725 | HLA-DRB1*04:03            | Dengue virus 1 | ELISPOT             | IFNg release | Positive |
| 539715  | NGKRVILSRKTFDT   | NS3  | 1854 | 1868 | HLA-DRB1*12:02            | Dengue virus 1 | ELISPOT             | IFNg release | Positive |
| 539839  | REAIKKRLRTLILAP  | NS3  | 1685 | 1699 | HLA-DRB1*14:04            | Dengue virus 1 | ELISPOT             | IFNg release | Positive |
| 539902  | SGTYVSAIAQAKASQ  | NS3  | 1633 | 1647 | HLA-DRB1*10:01            | Dengue virus 1 | ELISPOT             | IFNg release | Positive |
| 539986  | TLILAPTRVVASEMA  | NS3  | 1694 | 1708 | HLA-DRB1*13:01            | Dengue virus 1 | ELISPOT             | IFNg release | Positive |
| 539993  | TNCLRNKNGKRVQLS  | NS3  | 1848 | 1862 | HLA-DRB1*13:01            | Dengue virus 1 | ELISPOT             | IFNg release | Positive |
| 540040  | VGLYNGGVVTTSGTY  | NS3  | 1622 | 1636 | HLA-DRB1*15:06            | Dengue virus 1 | ELISPOT             | IFNg release | Positive |
| 540071  | VREAIKKRLTLILA   | NS3  | 1684 | 1698 | HLA-DRB1*12:02            | Dengue virus 1 | ELISPOT             | IFNg release | Positive |
| 540074  | VREAIKKRLTLILA   | NS3  | 1684 | 1698 | HLA-DRB1*12:02            | Dengue virus 1 | ELISPOT             | IFNg release | Positive |
| 540075  | VREAIKKRLTLVLA   | NS3  | 1684 | 1698 | HLA-DRB1*12:02            | Dengue virus 1 | ELISPOT             | IFNg release | Positive |
| 54391   | RKLTIMDLHPGSGTK  | NS3  | 1662 | 1676 | HLA class II              | Dengue virus 1 | ICS                 | IFNg release | Positive |
| 738417  | AAAFMTATPPGSAAE  | NS3  | 1785 | 1799 | HLA-DRB1*04:07            | Dengue virus 1 | ELISPOT             | IFNg release | Positive |
| 738418  | AAAFMTATPPGSME   | NS3  | 1785 | 1799 | HLA-DRB1*04:07            | Dengue virus 1 | ELISPOT             | IFNg release | Positive |
| 739269  | IVGLYNGGVVTTSGT  | NS3  | 132  | 146  | HLA-DRB1*01:02            | Dengue virus 1 | ELISPOT             | IFNg release | Positive |
| 739540  | LPAIVREAIKKRLRT  | NS3  | 1680 | 1694 | HLA-DRB1*14:02            | Dengue virus 1 | ELISPOT             | IFNg release | Positive |
| 866181  | ASQEGPLPEIEDEVF  | NS3  | 1645 | 1659 | HLA-DQA1*05:01/DQB1*02:01 | Dengue virus 1 | ELISPOT             | IFNg release | Positive |
| 866469  | EAIKKRLRTLILAPT  | NS3  | 1686 | 1700 | HLA-DPB1*01:01            | Dengue virus 1 | ELISPOT             | IFNg release | Positive |
| 866721  | FKTPGEVGAJALDF   | NS3  | 1591 | 1605 | HLA-DQA1*03:01/DQB1*03:02 | Dengue virus 1 | ELISPOT             | IFNg release | Positive |
| 867025  | GVFQENVFHTMWHVT  | NS3  | 1514 | 1528 | HLA-DPB1*04:01            | Dengue virus 1 | ELISPOT             | IFNg release | Positive |
| 867396  | KGMPIRYQTAVKSE   | NS3  | 1712 | 1726 | HLA-DRB3*02:02            | Dengue virus 1 | ELISPOT             | IFNg release | Positive |
| 868113  | MIIMDEAHFTDPASI  | NS3  | 1756 | 1770 | HLA-DQA1*01:01/DQB1*05:01 | Dengue virus 1 | ELISPOT             | IFNg release | Positive |
| 868343  | PNYNMIMDEAHFTD   | NS3  | 1752 | 1766 | HLA-DQA1*05:01/DQB1*02:01 | Dengue virus 1 | ELISPOT             | IFNg release | Positive |
| 869341  | TSSTGYVSAIAQAKA  | NS3  | 1631 | 1645 | HLA-DQA1*01:02/DQB1*06:02 | Dengue virus 1 | ELISPOT             | IFNg release | Positive |
| 869688  | WHVTRGAVLMYQGRK  | NS3  | 1525 | 1539 | HLA-DQA1*01:02/DQB1*06:02 | Dengue virus 1 | ELISPOT             | IFNg release | Positive |
| 869696  | WNTGEEVQVIAVEPG  | NS3  | 1564 | 1578 | HLA-DQA1*03:01/DQB1*03:02 | Dengue virus 1 | ELISPOT             | IFNg release | Positive |
| 95169   | YRILQRGLGRSQ     | NS3  | 23   | 35   | HLA-DR1                   | Dengue virus 1 | ELISPOT             | IFNg release | Positive |
| 195478  | IETLMLLALIAVLGT  | NS4a | 2146 | 2160 | HLA-DRB1*15:01            | Dengue virus 1 | ELISPOT             | IFNg release | Positive |
| 195485  | IGLLCVMASSALLWM  | NS4a | 2177 | 2191 | HLA-DRB1*07:01            | Dengue virus 1 | ELISPOT             | IFNg release | Positive |
| 195596  | KTSIGLLCVTASSAL  | NS4a | 2174 | 2188 | HLA-DRB1*07:01            | Dengue virus 1 | ELISPOT             | IFNg release | Positive |
| 195679  | LMLLALIAVLTTGGVT | NS4a | 2149 | 2163 | HLA-DRB1*08:02            | Dengue virus 1 | ELISPOT             | IFNg release | Positive |
| 195680  | LMLLALTAVLTGGVT  | NS4a | 2149 | 2163 | HLA-DRB1*01:01            | Dengue virus 1 | ELISPOT             | IFNg release | Positive |
| 196046  | LTIELMLLALIAALT  | NS4a | 2145 | 2159 | HLA-DRB1*01:01            | Dengue virus 1 | ELISPOT             | IFNg release | Positive |
| 196214  | WIAASILEFFLMVL   | NS4a | 2198 | 2212 | HLA-DRB1*15:01            | Dengue virus 1 | ELISPOT             | IFNg release | Positive |
| 196255  | YVIGLLFMILTVA    | NS4a | 2230 | 2244 | HLA-DRB1*11:01            | Dengue virus 1 | ELISPOT             | IFNg release | Positive |
| 539383  | HLTLRAQNALDNLVM  | NS4a | 2110 | 2124 | HLA-DRB3*02:02            | Dengue virus 1 | ELISPOT             | IFNg release | Positive |
| 539744  | NQLAYVIGLLFMIL   | NS4a | 2226 | 2240 | HLA-DRB1*15:02            | Dengue virus 1 | ELISPOT             | IFNg release | Positive |
| 738677  | DLLEIGKLPHQLTL   | NS4a | 2099 | 2113 | HLA-DRB1*11:04            | Dengue virus 1 | ELISPOT             | IFNg release | Positive |
| 739034  | GLGKTSIGLLCVMAS  | NS4a | 2171 | 2185 | HLA-DRB1*11:04            | Dengue virus 1 | ELISPOT             | IFNg release | Positive |



|         |                  |      |      |      |                           |                |         |              |              |
|---------|------------------|------|------|------|---------------------------|----------------|---------|--------------|--------------|
| 739085  | GVTLFFSLGRGLGKT  | NS4a | 2161 | 2175 | HLA-DRB1*01:02            | Dengue virus 1 | ELISPOT | IFNg release | Positive     |
| 867109  | HWIAASILEFFLMV   | NS4a | 2197 | 2211 | HLA-DRB1*04:01            | Dengue virus 1 | ELISPOT | IFNg release | Positive     |
| 867112  | IAASILEFFLMVLL   | NS4a | 2199 | 2213 | HLA-DQA1*01:01/DOB1*05:01 | Dengue virus 1 | ELISPOT | IFNg release | Positive     |
| 867567  | LCVMASSALLVWMANV | NS4a | 2180 | 2194 | HLA-DQA1*01:02/DOB1*06:02 | Dengue virus 1 | ELISPOT | IFNg release | Positive     |
| 867760  | LLCVMASSVLLWMAS  | NS4a | 2179 | 2193 | HLA-DQA1*01:02/DOB1*06:02 | Dengue virus 1 | ELISPOT | IFNg release | Positive     |
| 868132  | MLLALIAVLTTGGVTL | NS4a | 2150 | 2164 | HLA-DRB1*04:02            | Dengue virus 1 | ELISPOT | IFNg release | Positive     |
| 195114  | AGAGLAFSLMKSLGG  | NS4b | 2476 | 2490 | HLA-DRB1*04:01            | Dengue virus 1 | ELISPOT | IFNg release | Positive     |
| 195193  | AVLMLVAHYAIGPG   | NS4b | 2355 | 2369 | HLA-DRB1*01:01            | Dengue virus 1 | ELISPOT | IFNg release | Positive     |
| 195308  | FMLVAHYAIGPGLQ   | NS4b | 2357 | 2371 | HLA-DRB1*07:01            | Dengue virus 1 | ELISPOT | IFNg release | Positive     |
| 195441  | HATMLDVLDRPASAW  | NS4b | 2269 | 2283 | HLA-DRB1*03:01            | Dengue virus 1 | ELISPOT | IFNg release | Positive     |
| 195455  | HHHATMLDVLDRPAS  | NS4b | 2267 | 2281 | HLA-DRB1*03:01            | Dengue virus 1 | ELISPOT | IFNg release | Positive     |
| 195476  | IDLPVVDYDAKFEKQ  | NS4b | 2398 | 2412 | HLA-DRB1*03:01            | Dengue virus 1 | ELISPOT | IFNg release | Positive     |
| 195561  | KFWNTTIAVSMANIF  | NS4b | 2456 | 2470 | HLA-DRB1*07:01            | Dengue virus 1 | ELISPOT | IFNg release | Positive     |
| 195620  | LCTSQILLMRTTWAL  | NS4b | 2421 | 2435 | HLA-DRB1*04:01            | Dengue virus 1 | ELISPOT | IFNg release | Positive     |
| 195637  | LQQLMLLILCTSQL   | NS4b | 2413 | 2427 | HLA-DRB1*08:02            | Dengue virus 1 | ELISPOT | IFNg release | Positive     |
| 195682  | LMMLVAHYAIGPGLQ  | NS4b | 2357 | 2371 | HLA-DRB1*07:01            | Dengue virus 1 | ELISPOT | IFNg release | Positive     |
| 195760  | MLLILCTSQLLMRT   | NS4b | 2417 | 2431 | HLA-DRB1*07:01            | Dengue virus 1 | ELISPOT | IFNg release | Positive     |
| 195848  | QIMLLILCTSQLLM   | NS4b | 2415 | 2429 | HLA-DRB1*07:01            | Dengue virus 1 | ELISPOT | IFNg release | Positive     |
| 196143  | VLMLVAHYAIGPGL   | NS4b | 2356 | 2370 | HLA-DRB1*01:01            | Dengue virus 1 | ELISPOT | IFNg release | Positive     |
| 539322  | GLAFSLMKSLGGRR   | NS4b | 2479 | 2493 | HLA-DRB1*10:01            | Dengue virus 1 | ELISPOT | IFNg release | Positive     |
| 539725  | NISLTAIANQAAILM  | NS4b | 2307 | 2321 | HLA-DRB1*04:03            | Dengue virus 1 | ELISPOT | IFNg release | Positive     |
| 738560  | AWTLYAVATTITPM   | NS4b | 2282 | 2296 | HLA-DRB1*04:07            | Dengue virus 1 | ELISPOT | IFNg release | Positive     |
| 738686  | DLRPASAWTLYAVAT  | NS4b | 2276 | 2290 | HLA-DRB1*01:02            | Dengue virus 1 | ELISPOT | IFNg release | Positive     |
| 740732  | WTLYAVATTITPMM   | NS4b | 2283 | 2297 | HLA-DRB1*04:07            | Dengue virus 1 | ELISPOT | IFNg release | Positive     |
| 866002  | AIANQAAILMGLDKG  | NS4b | 2312 | 2326 | HLA-DQA1*01:02/DOB1*06:02 | Dengue virus 1 | ELISPOT | IFNg release | Positive     |
| 868336  | PLTLTAAVLMLAAHY  | NS4b | 2349 | 2363 | HLA-DQA1*01:02/DOB1*06:02 | Dengue virus 1 | ELISPOT | IFNg release | Positive     |
| 869401  | VDGIVADLDPPVVD   | NS4b | 2392 | 2406 | HLA-DQA1*01:01/DOB1*05:01 | Dengue virus 1 | ELISPOT | IFNg release | Positive     |
| 1066544 | ACLGKSYAQMWQLMY  | NS5  | 3244 | 3258 | HLA-DRB1*04:01            | Dengue virus 1 | ELISPOT | IFNg release | Positive-Low |
| 195147  | AKNGTVMDSVISRRDQ | NS5  | 3076 | 3090 | HLA-DRB1*03:01            | Dengue virus 1 | ELISPOT | IFNg release | Positive     |
| 195150  | AKWLWGLFSRNKKPR  | NS5  | 2870 | 2884 | HLA-DRB1*15:01            | Dengue virus 1 | ELISPOT | IFNg release | Positive     |
| 195168  | AQMWSQLMYFHRDLR  | NS5  | 3251 | 3265 | HLA-DRB1*13:01            | Dengue virus 1 | ELISPOT | IFNg release | Positive     |
| 195186  | ATNIQVAINQVRRL   | NS5  | 3352 | 3366 | HLA-DRB1*03:01            | Dengue virus 1 | ELISPOT | IFNg release | Positive     |
| 195208  | CVNMMGKREKKLGE   | NS5  | 2942 | 2956 | HLA-DRB1*11:01            | Dengue virus 1 | ELISPOT | IFNg release | Positive     |
| 195212  | DDRFBATLALNDMG   | NS5  | 3163 | 3177 | HLA-DRB1*04:01            | Dengue virus 1 | ELISPOT | IFNg release | Positive     |
| 195223  | DMGKVRKIDPQWEP   | NS5  | 3175 | 3189 | HLA-DRB1*03:01            | Dengue virus 1 | ELISPOT | IFNg release | Positive     |
| 195236  | EEFTRKVRSSNAIGA  | NS5  | 2889 | 2903 | HLA-DRB1*08:02            | Dengue virus 1 | ELISPOT | IFNg release | Positive     |
| 195354  | GEKVKRQLNQLSKSE  | NS5  | 2503 | 2517 | HLA-DRB1*04:01            | Dengue virus 1 | ELISPOT | IFNg release | Positive     |
| 195360  | GGMLVRNPLSRNSTH  | NS5  | 2694 | 2708 | HLA-DRB1*08:02            | Dengue virus 1 | ELISPOT | IFNg release | Positive     |
| 195385  | GLHKLGYLRDISKI   | NS5  | 3003 | 3017 | HLA-DRB1*08:02            | Dengue virus 1 | ELISPOT | IFNg release | Positive     |
| 195421  | GTGNIVSAVNMTSRM  | NS5  | 2716 | 2730 | HLA-DRB1*08:02            | Dengue virus 1 | ELISPOT | IFNg release | Positive     |
| 195438  | GYLRDISKIPGGNM   | NS5  | 3008 | 3022 | HLA-DRB1*08:02            | Dengue virus 1 | ELISPOT | IFNg release | Positive     |
| 195464  | HWFSRENSLGSVEGE  | NS5  | 2988 | 3002 | HLA-DRB1*04:01            | Dengue virus 1 | ELISPOT | IFNg release | Positive     |
| 195582  | KPIDDRFATALNAL   | NS5  | 3160 | 3174 | HLA-DRB1*04:01            | Dengue virus 1 | ELISPOT | IFNg release | Positive     |
| 195655  | LLATSIFKLTQYNKV  | NS5  | 3055 | 3069 | HLA-DRB1*07:01            | Dengue virus 1 | ELISPOT | IFNg release | Positive     |
| 195755  | MGKVRKIDPQWEP    | NS5  | 3176 | 3190 | HLA-DRB1*03:01            | Dengue virus 1 | ELISPOT | IFNg release | Positive     |
| 195781  | NEDHWFSRGNLSGV   | NS5  | 2985 | 2999 | HLA-DRB1*04:01            | Dengue virus 1 | ELISPOT | IFNg release | Positive     |
| 195783  | NENLYDYMSTMKRFK  | NS5  | 3368 | 3382 | HLA-DRB1*11:01            | Dengue virus 1 | ELISPOT | IFNg release | Positive     |
| 195786  | NGTVMDSVISRRDQ   | NS5  | 3078 | 3092 | HLA-DRB1*03:01            | Dengue virus 1 | ELISPOT | IFNg release | Positive     |
| 195824  | NLYDYMSTMKRFKNE  | NS5  | 3370 | 3384 | HLA-DRB1*14:02            | Dengue virus 1 | ELISPOT | IFNg release | Positive     |
| 195852  | QLIMKDGREIVVPCR  | NS5  | 3207 | 3221 | HLA-DRB1*03:01            | Dengue virus 1 | ELISPOT | IFNg release | Positive     |
| 195903  | RPKNGTVMDSVISRR  | NS5  | 3074 | 3088 | HLA-DRB1*03:01            | Dengue virus 1 | ELISPOT | IFNg release | Positive     |
| 195923  | RWLWGLFSRNKKPRI  | NS5  | 2871 | 2885 | HLA-DRB1*15:01            | Dengue virus 1 | ELISPOT | IFNg release | Positive     |
| 195956  | SIFKLTQYNKVVRVQ  | NS5  | 3059 | 3073 | HLA-DRB1*09:01            | Dengue virus 1 | ELISPOT | IFNg release | Positive     |
| 196031  | TCVYNMMGKREKKLG  | NS5  | 2941 | 2955 | HLA-DRB1*11:01            | Dengue virus 1 | ELISPOT | IFNg release | Positive     |
| 196039  | TGNIVSAVNMTSRML  | NS5  | 2717 | 2731 | HLA-DRB1*04:01            | Dengue virus 1 | ELISPOT | IFNg release | Positive     |
| 196191  | VTARWLWGLFSRNKK  | NS5  | 2868 | 2882 | HLA-DRB1*15:01            | Dengue virus 1 | ELISPOT | IFNg release | Positive     |
| 196211  | WATNIQVAINQVRRL  | NS5  | 3351 | 3365 | HLA-DRB1*03:01            | Dengue virus 1 | ELISPOT | IFNg release | Positive     |
| 196220  | WLWGLFSRNKKPRIC  | NS5  | 2872 | 2886 | HLA-DRB1*11:01            | Dengue virus 1 | ELISPOT | IFNg release | Positive     |
| 196241  | YQNKVVRVQRPKNG   | NS5  | 3065 | 3079 | HLA-DRB1*08:02            | Dengue virus 1 | ELISPOT | IFNg release | Positive     |
| 196242  | YQNKVVRVQRPKNG   | NS5  | 3065 | 3079 | HLA-DRB1*08:02            | Dengue virus 1 | ELISPOT | IFNg release | Positive     |
| 539096  | ATSIFKLTQYNKVVR  | NS5  | 3057 | 3071 | HLA-DRB1*14:04            | Dengue virus 1 | ELISPOT | IFNg release | Positive     |
| 539107  | AVNMTSRMLNFRFTM  | NS5  | 2723 | 2737 | HLA-DRB1*15:02            | Dengue virus 1 | ELISPOT | IFNg release | Positive     |
| 539350  | GTAKLRWFVERNLVK  | NS5  | 2551 | 2565 | HLA-DRB1*09:01            | Dengue virus 1 | ELISPOT | IFNg release | Positive     |
| 539396  | IDDRFBATLALNDM   | NS5  | 3162 | 3176 | HLA-DRB1*01:01            | Dengue virus 1 | ELISPOT | IFNg release | Positive     |
| 539435  | ISGDDCVKPIDDRFAT | NS5  | 3152 | 3166 | HLA class II              | Dengue virus 1 | ICS     | IFNg release | Positive     |
| 539509  | KSEFNKYKSGIMEVL  | NS5  | 2515 | 2529 | HLA-DRB1*15:02            | Dengue virus 1 | ELISPOT | IFNg release | Positive     |
| 539537  | LAKAIFKLTQYNKV   | NS5  | 3056 | 3070 | HLA-DRB1*14:04            | Dengue virus 1 | ELISPOT | IFNg release | Positive     |
| 539691  | MTSRMLNFRFTMAHR  | NS5  | 17   | 31   | HLA-DRB1*14:06            | Dengue virus 1 | ELISPOT | IFNg release | Positive     |
| 539700  | MVNGVVRLLTKPWV   | NS5  | 103  | 117  | HLA-DRB1*12:02            | Dengue virus 1 | ELISPOT | IFNg release | Positive     |
| 539702  | MVTQIAMTDTTTPGQ  | NS5  | 2829 | 2843 | HLA class II              | Dengue virus 1 | ICS     | IFNg release | Positive     |
| 539862  | RMLNFRFTMAHRKPT  | NS5  | 20   | 34   | HLA-DRB1*14:02            | Dengue virus 1 | ELISPOT | IFNg release | Positive     |
| 539905  | SHHFHQLIMKDGREI  | NS5  | 3202 | 3216 | HLA-DRB1*13:01            | Dengue virus 1 | ELISPOT | IFNg release | Positive     |
| 540001  | TSIFKLTQYNKVVRV  | NS5  | 3058 | 3072 | HLA-DRB1*09:01            | Dengue virus 1 | ELISPOT | IFNg release | Positive     |
| 540018  | TYGLNFTNTMEAQLI  | NS5  | 3098 | 3112 | HLA-DRB1*15:06            | Dengue virus 1 | ELISPOT | IFNg release | Positive     |
| 540020  | TYGLNFTNTMEVQLI  | NS5  | 3098 | 3112 | HLA-DRB1*04:03            | Dengue virus 1 | ELISPOT | IFNg release | Positive     |
| 540083  | VRVQRPKSGTVMDV   | NS5  | 96   | 110  | HLA-DRB1*13:01            | Dengue virus 1 | ELISPOT | IFNg release | Positive     |
| 540100  | VVKPIDDRFBATLAL  | NS5  | 3157 | 3171 | HLA class II              | Dengue virus 1 | ICS     | IFNg release | Positive     |
| 540138  | WQLMYFHRRLRLAA   | NS5  | 3254 | 3268 | HLA-DRB1*14:04            | Dengue virus 1 | ELISPOT | IFNg release | Positive     |
| 738814  | ENLYDYMSTMKRFKN  | NS5  | 3369 | 3383 | HLA-DRB1*14:02            | Dengue virus 1 | ELISPOT | IFNg release | Positive     |
| 740024  | QNKVVRVQRPKNGT   | NS5  | 3066 | 3080 | HLA-DRB1*14:06            | Dengue virus 1 | ELISPOT | IFNg release | Positive     |
| 740668  | VQLIQMESEGIFLP   | NS5  | 3109 | 3123 | HLA-DRB1*11:04            | Dengue virus 1 | ELISPOT | IFNg release | Positive     |
| 740786  | YLDYMSTMKRFKNES  | NS5  | 3371 | 3385 | HLA-DRB1*14:02            | Dengue virus 1 | ELISPOT | IFNg release | Positive     |
| 866481  | EAVEDERFVLDVHRE  | NS5  | 2916 | 2930 | HLA-DQA1*01:01/DOB1*05:01 | Dengue virus 1 | ELISPOT | IFNg release | Positive     |
| 867505  | KSYAQMWQLMYFHR   | NS5  | 3248 | 3262 | HLA-DRB1*01:01            | Dengue virus 1 | ELISPOT | IFNg release | Positive     |
| 868240  | NKVVRVQRPKNGTV   | NS5  | 3067 | 3081 | HLA-DRB1*01:01            | Dengue virus 1 | ELISPOT | IFNg release | Positive     |
| 868296  | PEHALATSIFKLT    | NS5  | 3051 | 3065 | HLA-DRB1*02:01            | Dengue virus 1 | ELISPOT | IFNg release | Positive     |
| 868641  | RFLFEALGFNMEDH   | NS5  | 2974 | 2988 | HLA-DRB1*04:01            | Dengue virus 1 | ELISPOT | IFNg release | Positive     |
| 869091  | TAKLRWFVERNLVKP  | NS5  | 2552 | 2566 | HLA-DQA1*01:01/DOB1*05:01 | Dengue virus 1 | ELISPOT | IFNg release | Positive     |



# CD4 DENV-2 Epitopes

| Epitope_ID | AminoAcid_Seq       | Protein_Name | Start | End | Allele         | Serotype       | Method/Technique | Assay Group  | Qualitative Measure |
|------------|---------------------|--------------|-------|-----|----------------|----------------|------------------|--------------|---------------------|
| 1066603    | ARNTPFNMLKKERNR     | C            | 8     | 22  | HLA-DRB1*11:01 | Dengue virus 2 | ELISPOT          | IFNg release | Positive-Low        |
| 150105     | AFLRFLTIPPTAGIL     | C            | 52    | 66  | HLA-DRB1*01:01 | Dengue virus 2 | ELISPOT          | IFNg release | Positive            |
| 150247     | GMIIMLIPTVMAFHL     | C            | 103   | 117 | HLA-DRB1*01:01 | Dengue virus 2 | ELISPOT          | IFNg release | Positive            |
| 150369     | LKLFMALVAFLRFLT     | C            | 44    | 58  | HLA-DRB1*01:01 | Dengue virus 2 | ELISPOT          | IFNg release | Positive            |
| 150404     | LRLFMALVAFLRFLT     | C            | 44    | 58  | HLA-DRB1*11:01 | Dengue virus 2 | ELISPOT          | IFNg release | Positive            |
| 180597     | LFMALVAFLRFLTIP     | C            | 46    | 60  | HLA class II   | Dengue virus 2 | ELISPOT          | IFNg release | Positive            |
| 180768     | TIKSKAINVLRGFR      | C            | 71    | 85  | HLA class II   | Dengue virus 2 | ELISPOT          | IFNg release | Positive            |
| 195120     | AGMIIMLIPTVMAFH     | C            | 102   | 116 | HLA-DRB1*08:02 | Dengue virus 2 | ELISPOT          | IFNg release | Positive            |
| 195121     | AGMIIMLIPTVVAFH     | C            | 102   | 116 | HLA-DRB1*08:02 | Dengue virus 2 | ELISPOT          | IFNg release | Positive            |
| 195307     | FMALVAFLRFLTIPP     | C            | 47    | 61  | HLA-DRB1*11:01 | Dengue virus 2 | ELISPOT          | IFNg release | Positive            |
| 195326     | FRKEIGRMLNILNRR     | C            | 84    | 98  | HLA-DRB1*04:01 | Dengue virus 2 | ELISPOT          | IFNg release | Positive            |
| 195369     | GIIMIIPTVMAFHL      | C            | 103   | 117 | HLA-DRB1*08:02 | Dengue virus 2 | ELISPOT          | IFNg release | Positive            |
| 195413     | GPLRLFMALVAFLRF     | C            | 42    | 56  | HLA-DRB1*04:01 | Dengue virus 2 | ELISPOT          | IFNg release | Positive            |
| 195417     | GRMLNILNRRRRTAG     | C            | 89    | 103 | HLA-DRB1*11:01 | Dengue virus 2 | ELISPOT          | IFNg release | Positive            |
| 195432     | GVIIMIIPTVMAFHL     | C            | 103   | 117 | HLA-DRB1*08:02 | Dengue virus 2 | ELISPOT          | IFNg release | Positive            |
| 195489     | IGRMLNILNRRRRRTA    | C            | 88    | 102 | HLA-DRB1*08:02 | Dengue virus 2 | ELISPOT          | IFNg release | Positive            |
| 195490     | IGRMLNILNRRRRRTA    | C            | 88    | 102 | HLA-DRB1*11:01 | Dengue virus 2 | ELISPOT          | IFNg release | Positive            |
| 195496     | IIMLIPTVMAFHLTT     | C            | 105   | 119 | HLA-DRB1*01:02 | Dengue virus 2 | ELISPOT          | IFNg release | Positive            |
| 195556     | KEIGRMLNILNRRRR     | C            | 86    | 100 | HLA-DRB1*08:02 | Dengue virus 2 | ELISPOT          | IFNg release | Positive            |
| 195573     | KLFMALVAFLRFLTI     | C            | 45    | 59  | HLA-DRB1*15:01 | Dengue virus 2 | ELISPOT          | IFNg release | Positive            |
| 195654     | LKLYMALVAFLRFLT     | C            | 44    | 58  | HLA-DRB1*15:01 | Dengue virus 2 | ELISPOT          | IFNg release | Positive            |
| 195730     | LVAFRLFTIPPTAG      | C            | 50    | 64  | HLA-DRB1*04:01 | Dengue virus 2 | ELISPOT          | IFNg release | Positive            |
| 195744     | MALVAFLRFLTIPPT     | C            | 48    | 62  | HLA-DRB1*04:01 | Dengue virus 2 | ELISPOT          | IFNg release | Positive            |
| 195886     | RGFRKEIGRMLNILN     | C            | 82    | 96  | HLA-DRB1*04:01 | Dengue virus 2 | ELISPOT          | IFNg release | Positive            |
| 195889     | RGPLKLFMALVAFLR     | C            | 41    | 55  | HLA-DRB1*04:01 | Dengue virus 2 | ELISPOT          | IFNg release | Positive            |
| 195899     | RMLNILNRRRRTAGV     | C            | 71    | 85  | HLA-DRB1*08:02 | Dengue virus 2 | ELISPOT          | IFNg release | Positive            |
| 195910     | RTAGVIIMMIPTVVA     | C            | 100   | 114 | HLA-DRB1*08:02 | Dengue virus 2 | ELISPOT          | IFNg release | Positive            |
| 195911     | RTASVIVMIPTVMA      | C            | 100   | 114 | HLA-DRB1*08:02 | Dengue virus 2 | ELISPOT          | IFNg release | Positive            |
| 196024     | TAGVIVMIPTVMAF      | C            | 101   | 115 | HLA-DRB1*08:02 | Dengue virus 2 | ELISPOT          | IFNg release | Positive            |
| 196064     | TPFNMLKKERNRVST     | C            | 11    | 25  | HLA-DRB1*08:02 | Dengue virus 2 | ELISPOT          | IFNg release | Positive            |
| 196084     | TVGVIIIMLIPTAMAF    | C            | 101   | 115 | HLA-DRB1*08:02 | Dengue virus 2 | ELISPOT          | IFNg release | Positive            |
| 196093     | VAFLRFLTIPPTAGI     | C            | 51    | 65  | HLA-DRB1*04:01 | Dengue virus 2 | ELISPOT          | IFNg release | Positive            |
| 196213     | WGTIKSKAINVLRG      | C            | 69    | 83  | HLA-DRB1*07:01 | Dengue virus 2 | ELISPOT          | IFNg release | Positive            |
| 26836      | IKSKAINVLRGFRKEIGRM | C            | 72    | 91  | HLA class II   | Dengue virus 2 | ELISPOT          | IFNg release | Positive            |
| 39098      | LRGFRKEIGRML        | C            | 81    | 92  | HLA-DPw4       | Dengue virus 2 | ICS              | IFNg release | Positive            |
| 53867      | RGFRKEIGRMLNILNRRRS | C            | 17    | 35  | HLA class II   | Dengue virus 2 | ELISPOT          | IFNg release | Positive            |
| 539046     | AFLRFLTIPPTVGIL     | C            | 52    | 66  | HLA-DRB1*10:01 | Dengue virus 2 | ELISPOT          | IFNg release | Positive            |
| 539051     | AFVAFLRFLTIPPTA     | C            | 9     | 23  | HLA-DRB1*15:02 | Dengue virus 2 | ELISPOT          | IFNg release | Positive            |
| 539083     | ALVAFLRFLTIPPTA     | C            | 49    | 63  | HLA-DRB1*12:02 | Dengue virus 2 | ELISPOT          | IFNg release | Positive            |
| 539213     | EIGRMLNILNKRRTT     | C            | 87    | 101 | HLA-DRB1*13:01 | Dengue virus 2 | ELISPOT          | IFNg release | Positive            |
| 539214     | EIGRMLNILNKRRTT     | C            | 87    | 101 | HLA-DRB1*12:02 | Dengue virus 2 | ELISPOT          | IFNg release | Positive            |
| 539264     | FLRFLTIPPTAGILK     | C            | 53    | 67  | HLA-DRB1*14:02 | Dengue virus 2 | ELISPOT          | IFNg release | Positive            |
| 539343     | GRMLNIMNRRRRRTAG    | C            | 89    | 103 | HLA-DRB1*13:01 | Dengue virus 2 | ELISPOT          | IFNg release | Positive            |
| 539410     | IKSKAINVLRGFRK      | C            | 72    | 86  | HLA-DRB1*14:04 | Dengue virus 2 | ELISPOT          | IFNg release | Positive            |
| 539514     | KSKAINVLRGFRKEI     | C            | 74    | 88  | HLA-DRB1*12:02 | Dengue virus 2 | ELISPOT          | IFNg release | Positive            |
| 539549     | LFTALVAFLRFLTIP     | C            | 46    | 60  | HLA-DRB1*15:06 | Dengue virus 2 | ELISPOT          | IFNg release | Positive            |
| 539612     | LQGRGPLKLFMALVA     | C            | 38    | 52  | HLA-DRB1*15:02 | Dengue virus 2 | ELISPOT          | IFNg release | Positive            |
| 539618     | LRGFRKEIGRMLNIL     | C            | 81    | 95  | HLA-DRB1*09:01 | Dengue virus 2 | ELISPOT          | IFNg release | Positive            |
| 539887     | RWGTIKSKAINVLR      | C            | 68    | 82  | HLA-DRB1*08:03 | Dengue virus 2 | ELISPOT          | IFNg release | Positive            |
| 540060     | VLRGFRKEIGRMLNI     | C            | 80    | 94  | HLA-DRB1*09:01 | Dengue virus 2 | ELISPOT          | IFNg release | Positive            |
| 540069     | VQQLTKRFLGMLQG      | C            | 26    | 40  | HLA-DRB1*13:01 | Dengue virus 2 | ELISPOT          | IFNg release | Positive            |
| 62853      | TAGILKRWGTTIKSKANVL | C            | 62    | 81  | HLA class II   | Dengue virus 2 | ELISPOT          | IFNg release | Positive            |
| 739176     | IGRMLNILNKRRTTA     | C            | 88    | 102 | HLA-DRB1*14:02 | Dengue virus 2 | ELISPOT          | IFNg release | Positive            |
| 739177     | IGRMLNILNKRRTSA     | C            | 88    | 102 | HLA-DRB1*14:02 | Dengue virus 2 | ELISPOT          | IFNg release | Positive            |
| 739179     | IGRMLNILNKRRTSV     | C            | 88    | 102 | HLA-DRB1*14:02 | Dengue virus 2 | ELISPOT          | IFNg release | Positive            |
| 739180     | IGRMLNILNKRRTTT     | C            | 88    | 102 | HLA-DRB1*14:02 | Dengue virus 2 | ELISPOT          | IFNg release | Positive            |
| 739181     | IGRMLNILNKRRTV      | C            | 42    | 56  | HLA-DRB1*14:02 | Dengue virus 2 | ELISPOT          | IFNg release | Positive            |
| 739182     | IGRMLNIMNKRRTTA     | C            | 88    | 102 | HLA-DRB1*14:02 | Dengue virus 2 | ELISPOT          | IFNg release | Positive            |
| 739183     | IGRMMNILNKRRTTA     | C            | 88    | 102 | HLA-DRB1*14:02 | Dengue virus 2 | ELISPOT          | IFNg release | Positive            |
| 739879     | PFNMLKKERNRVSTV     | C            | 12    | 26  | HLA-DRB1*14:02 | Dengue virus 2 | ELISPOT          | IFNg release | Positive            |
| 740399     | STPFNMLKKERNRVSV    | C            | 10    | 24  | HLA-DRB1*14:02 | Dengue virus 2 | ELISPOT          | IFNg release | Positive            |
| 740579     | VAFLRFLTIPPTAGI     | C            | 51    | 65  | HLA-DRB1*04:07 | Dengue virus 2 | ELISPOT          | IFNg release | Positive            |
| 857784     | LKRWGTIKSKAINV      | C            | 66    | 80  | HLA-DRB1*07:01 | Dengue virus 2 | ELISPOT          | IFNg release | Positive-Low        |
| 866992     | GPLKLYMALVAFLRF     | C            | 42    | 56  | HLA-DRB5*01:01 | Dengue virus 2 | ELISPOT          | IFNg release | Positive            |
| 867734     | LKGRKEIGRMLNIL      | C            | 81    | 95  | HLA-DRB3*02:02 | Dengue virus 2 | ELISPOT          | IFNg release | Positive            |
| 867910     | LRGFRKEIGRMLNIM     | C            | 81    | 95  | HLA-DRB3*02:02 | Dengue virus 2 | ELISPOT          | IFNg release | Positive            |
| 867911     | LRGFRREIGRMLNIL     | C            | 81    | 95  | HLA-DRB3*02:02 | Dengue virus 2 | ELISPOT          | IFNg release | Positive            |
| 868674     | RLFMALVAFLRFLTI     | C            | 45    | 59  | HLA-DPB1*04:02 | Dengue virus 2 | ELISPOT          | IFNg release | Positive            |
| 150280     | HPGFTLMAAILAYTI     | PreM         | 244   | 258 | HLA-DRB1*01:01 | Dengue virus 2 | ELISPOT          | IFNg release | Positive            |
| 150490     | PGFTIMAAILAYTIG     | PreM         | 245   | 259 | HLA-DRB1*01:01 | Dengue virus 2 | ELISPOT          | IFNg release | Positive            |
| 180708     | QRIETWILRHPGFTM     | PreM         | 121   | 135 | HLA class II   | Dengue virus 2 | ELISPOT          | IFNg release | Positive-Low        |
| 195318     | FQKILIFILLTAVAP     | PreM         | 263   | 277 | HLA-DRB1*07:01 | Dengue virus 2 | ELISPOT          | IFNg release | Positive            |
| 195320     | FQRTLIFILLTAVAP     | PreM         | 263   | 277 | HLA-DRB1*07:01 | Dengue virus 2 | ELISPOT          | IFNg release | Positive            |
| 195322     | FQRLVIFILLTAVAP     | PreM         | 263   | 277 | HLA-DRB1*07:01 | Dengue virus 2 | ELISPOT          | IFNg release | Positive            |
| 195448     | HFQRALIFILLTAVA     | PreM         | 262   | 276 | HLA-DRB1*07:01 | Dengue virus 2 | ELISPOT          | IFNg release | Positive            |
| 195503     | ILRHPPGFTIMAAILA    | PreM         | 127   | 141 | HLA-DRB1*07:01 | Dengue virus 2 | ELISPOT          | IFNg release | Positive            |
| 195504     | ILRHPPGFTLMAAILA    | PreM         | 241   | 255 | HLA-DRB1*15:01 | Dengue virus 2 | ELISPOT          | IFNg release | Positive            |
| 195702     | LRHPPGFTIMAAILAY    | PreM         | 242   | 256 | HLA-DRB1*11:01 | Dengue virus 2 | ELISPOT          | IFNg release | Positive            |
| 195862     | QRALIFILLTAVAPS     | PreM         | 264   | 278 | HLA-DRB1*15:01 | Dengue virus 2 | ELISPOT          | IFNg release | Positive            |
| 195863     | QRLVIFILLTAVAPS     | PreM         | 264   | 278 | HLA-DRB1*08:02 | Dengue virus 2 | ELISPOT          | IFNg release | Positive            |
| 195892     | RIETWILRHPGFTIM     | PreM         | 122   | 136 | HLA-DRB1*15:01 | Dengue virus 2 | ELISPOT          | IFNg release | Positive            |
| 196045     | THFQRALIFILLTAV     | PreM         | 261   | 275 | HLA-DRB1*07:01 | Dengue virus 2 | ELISPOT          | IFNg release | Positive            |
| 196141     | VLIFILLTAIAPSMT     | PreM         | 266   | 280 | HLA-DRB1*08:02 | Dengue virus 2 | ELISPOT          | IFNg release | Positive            |
| 196232     | YFQRLVIFILLTAVT     | PreM         | 262   | 276 | HLA-DRB1*07:01 | Dengue virus 2 | ELISPOT          | IFNg release | Positive            |
| 539881     | RVLIFILLTAIAPSM     | PreM         | 265   | 279 | HLA-DRB1*15:06 | Dengue virus 2 | ELISPOT          | IFNg release | Positive            |



|        |                       |      |      |      |                           |                |         |              |          |
|--------|-----------------------|------|------|------|---------------------------|----------------|---------|--------------|----------|
| 539943 | SVALPHVGMGLETR        | PreM | 206  | 220  | HLA-DRB1*15:02            | Dengue virus 2 | ELISPOT | IFNg release | Positive |
| 540130 | WILRHPGFTIMAAIL       | PreM | 126  | 140  | HLA-DRB1*15:06            | Dengue virus 2 | ELISPOT | IFNg release | Positive |
| 739425 | LAYTIGTTHFQRALI       | PreM | 254  | 268  | HLA-DRB1*04:07            | Dengue virus 2 | ELISPOT | IFNg release | Positive |
| 866485 | EDGVNMCTLMAIDLG       | PreM | 142  | 156  | HLA-DQA1*01:02/DQB1*06:02 | Dengue virus 2 | ELISPOT | IFNg release | Positive |
| 868650 | RHPGFTLMAAILAYT       | PreM | 243  | 257  | HLA-DQA1*01:02/DQB1*06:02 | Dengue virus 2 | ELISPOT | IFNg release | Positive |
| 144940 | RHVLGRLITVNPVIT       | E    | 345  | 359  | HLA-DRB1*08:02            | Dengue virus 2 | ELISPOT | IFNg release | Positive |
| 180564 | KKQDQVVVLGSQEGAM      | E    | 526  | 540  | HLA class II              | Dengue virus 2 | ELISPOT | IFNg release | Positive |
| 180568 | KNPHAKKQDVVVLGS       | E    | 521  | 535  | HLA class II              | Dengue virus 2 | ELISPOT | IFNg release | Positive |
| 180590 | LDRELITKEAKQPAT       | E    | 41   | 55   | HLA class II              | Dengue virus 2 | ELISPOT | IFNg release | Positive |
| 180820 | WLVRHQWFLDPLPW        | E    | 196  | 210  | HLA class II              | Dengue virus 2 | ELISPOT | IFNg release | Positive |
| 195351 | GATEIQMSSGNLLFT       | E    | 266  | 280  | HLA-DRB1*03:01            | Dengue virus 2 | ELISPOT | IFNg release | Positive |
| 195366 | GHLKCRLRMDKLQLK       | E    | 281  | 295  | HLA-DRB1*03:01            | Dengue virus 2 | ELISPOT | IFNg release | Positive |
| 195407 | GMNSRSTLSVSLVL        | E    | 467  | 481  | HLA-DRB1*07:01            | Dengue virus 2 | ELISPOT | IFNg release | Positive |
| 195638 | LGRLITVNPVITEKD       | E    | 628  | 642  | HLA-DRB1*08:02            | Dengue virus 2 | ELISPOT | IFNg release | Positive |
| 195716 | LSVSLVLGVVTLYL        | E    | 755  | 769  | HLA-DRB1*15:01            | Dengue virus 2 | ELISPOT | IFNg release | Positive |
| 195793 | NLEYITMITPHSGEE       | E    | 134  | 148  | HLA-DRB1*04:01            | Dengue virus 2 | ELISPOT | IFNg release | Positive |
| 195952 | SGVSWTMKILUGVII       | E    | 449  | 463  | HLA-DRB1*15:01            | Dengue virus 2 | ELISPOT | IFNg release | Positive |
| 196022 | SWTMKILIGVIITWI       | E    | 452  | 466  | HLA-DRB1*08:02            | Dengue virus 2 | ELISPOT | IFNg release | Positive |
| 196077 | TSLSVSLVLGVVTL        | E    | 753  | 767  | HLA-DRB1*07:01            | Dengue virus 2 | ELISPOT | IFNg release | Positive |
| 196140 | VLGRITVNPVITEK        | E    | 627  | 641  | HLA-DRB1*08:02            | Dengue virus 2 | ELISPOT | IFNg release | Positive |
| 196215 | WIQETLVTFKNPHA        | E    | 231  | 245  | HLA-DRB1*08:02            | Dengue virus 2 | ELISPOT | IFNg release | Positive |
| 539236 | ENLEYITVITPHSGE       | E    | 133  | 147  | HLA-DRB1*04:07            | Dengue virus 2 | ELISPOT | IFNg release | Positive |
| 539252 | FETTMRGAKRMAILG       | E    | 402  | 416  | HLA-DRB1*15:02            | Dengue virus 2 | ELISPOT | IFNg release | Positive |
| 539377 | HAKKQDQVVVLGSQEGAMH   | E    | 244  | 261  | HLA class II              | Dengue virus 2 | ICS     | IFNg release | Positive |
| 539427 | IQKTLVTFKNPHAK        | E    | 512  | 526  | HLA-DRB1*04:03            | Dengue virus 2 | ELISPOT | IFNg release | Positive |
| 539462 | KEMLVTFKNPHAKRQ       | E    | 514  | 528  | HLA-DRB1*04:03            | Dengue virus 2 | ELISPOT | IFNg release | Positive |
| 539464 | KETLVTFKNPHAKKQ       | E    | 234  | 248  | HLA-DRB1*10:01            | Dengue virus 2 | ELISPOT | IFNg release | Positive |
| 539479 | KKTLVTFKNPHAKKQ       | E    | 514  | 528  | HLA-DRB1*14:04            | Dengue virus 2 | ELISPOT | IFNg release | Positive |
| 539629 | LSVTLVLGVFVTLYL       | E    | 475  | 489  | HLA-DRB1*15:06            | Dengue virus 2 | ELISPOT | IFNg release | Positive |
| 539648 | LVTFKNPHAKKQDVV       | E    | 237  | 251  | HLA-DRB1*15:02            | Dengue virus 2 | ELISPOT | IFNg release | Positive |
| 539689 | MARGAKRMAILGDTAW      | E    | 406  | 420  | HLA-DRB1*15:06            | Dengue virus 2 | ELISPOT | IFNg release | Positive |
| 539733 | NLEYITVITPHSGEE       | E    | 134  | 148  | HLA-DRB1*04:07            | Dengue virus 2 | ELISPOT | IFNg release | Positive |
| 539806 | QKETLVTFKNPHAKK       | E    | 513  | 527  | HLA-DRB1*04:03            | Dengue virus 2 | ELISPOT | IFNg release | Positive |
| 65140  | TLVTFKNPHAKKQDV       | E    | 236  | 250  | HLA class II              | Dengue virus 2 | ELISPOT | IFNg release | Positive |
| 738866 | EYITVITPHSGEEHA       | E    | 136  | 150  | HLA-DRB1*04:07            | Dengue virus 2 | ELISPOT | IFNg release | Positive |
| 739010 | GGVFTSISGKALHQVF      | E    | 706  | 720  | HLA-DRB1*14:02            | Dengue virus 2 | ELISPOT | IFNg release | Positive |
| 740315 | SLSVSLVLGVVVTLY       | E    | 754  | 768  | HLA-DRB1*01:02            | Dengue virus 2 | ELISPOT | IFNg release | Positive |
| 741744 | MRCIGISNDRFVEGVSGSW   | E    | 281  | 300  | HLA class II              | Dengue virus 2 | ELISPOT | IFNg release | Positive |
| 866193 | ATEIQMSSGNLLFTG       | E    | 257  | 271  | HLA-DRB3*02:02            | Dengue virus 2 | ELISPOT | IFNg release | Positive |
| 866243 | AWMVHRQWFLDPLP        | E    | 205  | 219  | HLA-DQA1*01:01/DQB1*05:01 | Dengue virus 2 | ELISPOT | IFNg release | Positive |
| 867375 | KAWLVHRQWFLDLPF       | E    | 204  | 218  | HLA-DQA1*01:01/DQB1*05:01 | Dengue virus 2 | ELISPOT | IFNg release | Positive |
| 868347 | PPFGDSVVIIGVEPG       | E    | 371  | 385  | HLA-DQA1*03:01/DQB1*03:02 | Dengue virus 2 | ELISPOT | IFNg release | Positive |
| 868713 | RTGLDFNEMVLLQME       | E    | 178  | 192  | HLA-DQA1*01:02/DQB1*06:02 | Dengue virus 2 | ELISPOT | IFNg release | Positive |
| 869123 | TEKDSVPNIEAPPF        | E    | 349  | 363  | HLA-DQA1*03:01/DQB1*03:02 | Dengue virus 2 | ELISPOT | IFNg release | Positive |
| 869152 | TGLDFNEMVLLQMED       | E    | 189  | 203  | HLA-DQA1*03:01/DQB1*03:02 | Dengue virus 2 | ELISPOT | IFNg release | Positive |
| 869153 | TGLDFNEMVLLQMEN       | E    | 179  | 193  | HLA-DQA1*03:01/DQB1*03:02 | Dengue virus 2 | ELISPOT | IFNg release | Positive |
| 167759 | IMTGDIKGIMQA          | NS1  | 88   | 99   | HLA-DQ6                   | Dengue virus 2 | ELISPOT | IFNg release | Positive |
| 180396 | DGCWYGMERPLKEKEENLVNS | NS1  | 1102 | 1123 | HLA class II              | Dengue virus 2 | ICS     | IFNg release | Positive |
| 180603 | LKYSWKTWKGAKMLS       | NS1  | 111  | 125  | HLA class II              | Dengue virus 2 | ELISPOT | IFNg release | Positive |
| 180612 | LNNDTWKIEKASFIEV      | NS1  | 981  | 995  | HLA class II              | Dengue virus 2 | ELISPOT | IFNg release | Positive |
| 195458 | HNQTFIDGPETAEC        | NS1  | 904  | 918  | HLA-DRB1*04:01            | Dengue virus 2 | ELISPOT | IFNg release | Positive |
| 195576 | KLTIMTGDIKGIMQA       | NS1  | 85   | 99   | HLA-DRB1*03:01            | Dengue virus 2 | ELISPOT | IFNg release | Positive |
| 195583 | KQDVFCDSKLMSAAI       | NS1  | 949  | 963  | HLA-DRB1*03:01            | Dengue virus 2 | ELISPOT | IFNg release | Positive |
| 195845 | QDVFCDSKLMSAAIK       | NS1  | 175  | 189  | HLA-DRB1*03:01            | Dengue virus 2 | ELISPOT | IFNg release | Positive |
| 195880 | REKQDVFCDSKLMSA       | NS1  | 947  | 961  | HLA-DRB1*03:01            | Dengue virus 2 | ELISPOT | IFNg release | Positive |
| 195954 | SHNQTFIDGPETAEC       | NS1  | 903  | 917  | HLA-DRB1*04:01            | Dengue virus 2 | ELISPOT | IFNg release | Positive |
| 196133 | VKLTIMTGDIKGIMQ       | NS1  | 84   | 98   | HLA-DRB1*03:01            | Dengue virus 2 | ELISPOT | IFNg release | Positive |
| 539708 | NDTWKMEKASFIEVK       | NS1  | 982  | 996  | HLA-DRB1*09:01            | Dengue virus 2 | ELISPOT | IFNg release | Positive |
| 539828 | QYKFQSPESPSKLASA      | NS1  | 806  | 820  | HLA-DRB3*02:02            | Dengue virus 2 | ELISPOT | IFNg release | Positive |
| 738586 | CGIRSVRTLENLMWK       | NS1  | 55   | 69   | HLA-DRB1*11:04            | Dengue virus 2 | ELISPOT | IFNg release | Positive |
| 738766 | EGICGIRSVTRLLENL      | NS1  | 52   | 66   | HLA-DRB1*11:04            | Dengue virus 2 | ELISPOT | IFNg release | Positive |
| 739191 | IKGIMHAGKRSRLRPQ      | NS1  | 868  | 882  | HLA-DRB1*14:02            | Dengue virus 2 | ELISPOT | IFNg release | Positive |
| 739192 | IKGIMQAGKRSRLRPQ      | NS1  | 93   | 107  | HLA-DRB1*14:06            | Dengue virus 2 | ELISPOT | IFNg release | Positive |
| 739296 | KGIMQAGKRSRLPOP       | NS1  | 94   | 108  | HLA-DRB1*14:06            | Dengue virus 2 | ELISPOT | IFNg release | Positive |
| 866460 | DYFGVFVTNNIWLKL       | NS1  | 932  | 946  | HLA-DPB1*02:01            | Dengue virus 2 | ELISPOT | IFNg release | Positive |
| 866699 | FGVFTTNIWLKLREK       | NS1  | 935  | 949  | HLA-DPB1*04:01            | Dengue virus 2 | ELISPOT | IFNg release | Positive |
| 866829 | FGFFTTNIWLKLRE        | NS1  | 934  | 948  | HLA-DPB1*01:01            | Dengue virus 2 | ELISPOT | IFNg release | Positive |
| 866830 | FGVFTTNIWLKLKE        | NS1  | 934  | 948  | HLA-DPB1*04:01            | Dengue virus 2 | ELISPOT | IFNg release | Positive |
| 866831 | FGVFTTNIWLKLRE        | NS1  | 934  | 948  | HLA-DPB1*04:01            | Dengue virus 2 | ELISPOT | IFNg release | Positive |
| 867040 | HADMGYWIESALNDT       | NS1  | 970  | 984  | HLA-DQA1*01:01/DQB1*05:01 | Dengue virus 2 | ELISPOT | IFNg release | Positive |
| 869722 | YGFVFTTNIWLKLRL       | NS1  | 933  | 947  | HLA-DPB1*04:01            | Dengue virus 2 | ELISPOT | IFNg release | Positive |
| 150131 | ALTIKGLNPFTAFLT       | NS2a | 1308 | 1322 | HLA-DRB1*09:01            | Dengue virus 2 | ELISPOT | IFNg release | Positive |
| 150245 | GMGVTLALLAAYKV        | NS2a | 1196 | 1210 | HLA-DRB1*01:01            | Dengue virus 2 | ELISPOT | IFNg release | Positive |
| 150273 | GVTYLALLAAFKVRP       | NS2a | 1198 | 1212 | HLA-DRB1*01:01            | Dengue virus 2 | ELISPOT | IFNg release | Positive |
| 167819 | SSQKTDWIPALTIKGLNP    | NS2a | 184  | 203  | HLA-DP                    | Dengue virus 2 | ELISPOT | IFNg release | Positive |
| 195153 | ALLAAFKVRPTFAAG       | NS2a | 1203 | 1217 | HLA-DRB1*08:02            | Dengue virus 2 | ELISPOT | IFNg release | Positive |
| 195207 | CTILAVSVSPLLLT        | NS2a | 1144 | 1158 | HLA-DRB1*07:01            | Dengue virus 2 | ELISPOT | IFNg release | Positive |
| 195269 | ERYQLAVTTAILCV        | NS2a | 1268 | 1282 | HLA-DRB1*07:01            | Dengue virus 2 | ELISPOT | IFNg release | Positive |
| 195406 | GMMVLKIVRNMEKYQ       | NS2a | 1257 | 1271 | HLA-DRB1*08:02            | Dengue virus 2 | ELISPOT | IFNg release | Positive |
| 195523 | IPVLIIKGLNPATI        | NS2a | 1319 | 1333 | HLA-DRB1*08:02            | Dengue virus 2 | ELISPOT | IFNg release | Positive |
| 195567 | KHAILLVAVSFVTLI       | NS2a | 1157 | 1171 | HLA-DRB1*07:01            | Dengue virus 2 | ELISPOT | IFNg release | Positive |
| 195610 | LALGMMVLKIVRNME       | NS2a | 1254 | 1268 | HLA-DRB1*13:01            | Dengue virus 2 | ELISPOT | IFNg release | Positive |
| 195615 | LAUVSVSPLLLTSSQ       | NS2a | 1186 | 1200 | HLA-DRB1*07:01            | Dengue virus 2 | ELISPOT | IFNg release | Positive |
| 195650 | LKIVRNMEKYQLAVT       | NS2a | 1261 | 1275 | HLA-DRB1*13:01            | Dengue virus 2 | ELISPOT | IFNg release | Positive |
| 195688 | LNPTAIFLTLSRSTS       | NS2a | 1328 | 1342 | HLA-DRB1*07:01            | Dengue virus 2 | ELISPOT | IFNg release | Positive |
| 195712 | LSLTFIRSTPLIMA        | NS2a | 1275 | 1289 | HLA-DRB1*07:01            | Dengue virus 2 | ELISPOT | IFNg release | Positive |
| 195752 | MEKYQLAVTIMAILC       | NS2a | 1154 | 1168 | HLA-DRB1*04:07            | Dengue virus 2 | ELISPOT | IFNg release | Positive |
| 195753 | MEKYQLAVTIMAISC       | NS2a | 1267 | 1281 | HLA-DRB1*10:01            | Dengue virus 2 | ELISPOT | IFNg release | Positive |



|         |                      |      |      |      |                           |                |                     |              |              |
|---------|----------------------|------|------|------|---------------------------|----------------|---------------------|--------------|--------------|
| 195763  | MMVLKIVRKEMERYQL     | NS2a | 1258 | 1272 | HLA-DRB1*03:01            | Dengue virus 2 | ELISPOT             | IFNg release | Positive     |
| 195798  | NMEKYQLAVTIMAIL      | NS2a | 1266 | 1280 | HLA-DRB1*04:01            | Dengue virus 2 | ELISPOT             | IFNg release | Positive     |
| 195799  | NMEKYQLAVTIMAIS      | NS2a | 1266 | 1280 | HLA-DRB1*04:01            | Dengue virus 2 | ELISPOT             | IFNg release | Positive     |
| 196174  | VRNMEKYQLAVTIMA      | NS2a | 1264 | 1278 | HLA-DRB1*13:01            | Dengue virus 2 | ELISPOT             | IFNg release | Positive     |
| 196217  | WKVSCITLAAVSVSP      | NS2a | 1292 | 1306 | HLA-DRB1*04:01            | Dengue virus 2 | ELISPOT             | IFNg release | Positive     |
| 196218  | WKVSCITLAAVSVSP      | NS2a | 1292 | 1306 | HLA-DRB1*04:01            | Dengue virus 2 | ELISPOT             | IFNg release | Positive     |
| 196237  | YQLAVTIMAISCVPN      | NS2a | 1270 | 1284 | HLA-DRB1*08:02            | Dengue virus 2 | ELISPOT             | IFNg release | Positive     |
| 539077  | ALGIMVLKIMVRSMEK     | NS2a | 1255 | 1269 | HLA-DRB1*12:02            | Dengue virus 2 | ELISPOT             | IFNg release | Positive     |
| 539082  | ALTIKGLNPATILLT      | NS2a | 1322 | 1336 | HLA-DRB1*09:01            | Dengue virus 2 | ELISPOT             | IFNg release | Positive     |
| 539108  | AVSFVTLITGNMSFR      | NS2a | 1164 | 1178 | HLA-DRB1*10:01            | Dengue virus 2 | ELISPOT             | IFNg release | Positive     |
| 539110  | AWALGMMVLKIVRNMM     | NS2a | 1253 | 1267 | HLA-DRB1*13:01            | Dengue virus 2 | ELISPOT             | IFNg release | Positive     |
| 539231  | ENMLRTRVGTKHAILL     | NS2a | 1148 | 1162 | HLA-DRB1*08:03            | Dengue virus 2 | ELISPOT             | IFNg release | Positive     |
| 539392  | IALGIMVLKIMVRSME     | NS2a | 1254 | 1268 | HLA-DRB1*13:01            | Dengue virus 2 | ELISPOT             | IFNg release | Positive     |
| 539474  | KIVRNMEKYQLAVTI      | NS2a | 1262 | 1276 | HLA-DRB1*13:01            | Dengue virus 2 | ELISPOT             | IFNg release | Positive     |
| 539540  | LALLAAFKVRPTFAA      | NS2a | 1202 | 1216 | HLA-DRB1*14:04            | Dengue virus 2 | ELISPOT             | IFNg release | Positive     |
| 539556  | LGMIMLKLVRKMEKY      | NS2a | 1256 | 1270 | HLA-DRB1*12:02            | Dengue virus 2 | ELISPOT             | IFNg release | Positive     |
| 539557  | LGIMVLKIVRSMEKY      | NS2a | 1256 | 1270 | HLA-DRB1*12:02            | Dengue virus 2 | ELISPOT             | IFNg release | Positive     |
| 539561  | LGMIMLKIVRNMEKY      | NS2a | 1256 | 1270 | HLA-DRB1*13:01            | Dengue virus 2 | ELISPOT             | IFNg release | Positive     |
| 539562  | LGMIMVLKIVRNMEKY     | NS2a | 1256 | 1270 | HLA-DRB1*12:02            | Dengue virus 2 | ELISPOT             | IFNg release | Positive     |
| 539686  | MMVLKIVRNMEKYQL      | NS2a | 1244 | 1258 | HLA-DRB1*14:06            | Dengue virus 2 | ELISPOT             | IFNg release | Positive     |
| 539699  | MVLKIMVRSMEKYQLA     | NS2a | 1259 | 1273 | HLA-DRB1*13:01            | Dengue virus 2 | ELISPOT             | IFNg release | Positive     |
| 539706  | NAWKVSCITLAAVSV      | NS2a | 1290 | 1304 | HLA-DRB1*09:01            | Dengue virus 2 | ELISPOT             | IFNg release | Positive     |
| 539789  | PTAIFLTLSRTSKK       | NS2a | 1316 | 1330 | HLA-DRB1*04:03            | Dengue virus 2 | ELISPOT             | IFNg release | Positive     |
| 539893  | SCITLAAVSVSPILL      | NS2a | 1295 | 1309 | HLA-DRB1*10:01            | Dengue virus 2 | ELISPOT             | IFNg release | Positive     |
| 539959  | TAIFLTLSRTSKKR       | NS2a | 1317 | 1331 | HLA-DRB1*14:02            | Dengue virus 2 | ELISPOT             | IFNg release | Positive     |
| 540026  | VAVSFVTLITGNMSF      | NS2a | 1163 | 1177 | HLA-DRB1*10:01            | Dengue virus 2 | ELISPOT             | IFNg release | Positive     |
| 540086  | VSFVTLITGNMSFRD      | NS2a | 1165 | 1179 | HLA-DRB1*10:01            | Dengue virus 2 | ELISPOT             | IFNg release | Positive     |
| 540094  | VTYLALLAAFKVRPT      | NS2a | 1199 | 1213 | HLA-DRB1*12:02            | Dengue virus 2 | ELISPOT             | IFNg release | Positive     |
| 540154  | YLALLAAFKVRPTFA      | NS2a | 1201 | 1215 | HLA-DRB1*14:04            | Dengue virus 2 | ELISPOT             | IFNg release | Positive     |
| 740700  | VVSVSPILLTSSQKQ      | NS2a | 1188 | 1202 | HLA-DRB1*01:02            | Dengue virus 2 | ELISPOT             | IFNg release | Positive     |
| 866586  | EKYQLAVTIMAISCV      | NS2a | 1268 | 1282 | HLA-DQA1*01:02/DQB1*06:02 | Dengue virus 2 | ELISPOT             | IFNg release | Positive     |
| 866978  | GMALFLEMLRTRVG       | NS2a | 1141 | 1155 | HLA-DQA1*01:01/DQB1*05:01 | Dengue virus 2 | ELISPOT             | IFNg release | Positive     |
| 867216  | ILCVNPAVILQNAWK      | NS2a | 1279 | 1293 | HLA-DQA1*01:02/DQB1*06:02 | Dengue virus 2 | ELISPOT             | IFNg release | Positive     |
| 867571  | LCVNPNAVILQNAWKV     | NS2a | 1280 | 1294 | HLA-DRB4*01:01            | Dengue virus 2 | ELISPOT             | IFNg release | Positive     |
| 868918  | SLGVLGMALFLEEML      | NS2a | 1136 | 1150 | HLA-DQA1*05:01/DQB1*02:01 | Dengue virus 2 | ELISPOT             | IFNg release | Positive     |
| 869200  | TKHAILLVAVSFVTL      | NS2a | 1156 | 1170 | HLA-DPB1*04:01            | Dengue virus 2 | ELISPOT             | IFNg release | Positive     |
| 150433  | MAVGMMVSIASSLLK      | NS2b | 1354 | 1368 | HLA-DRB1*01:01            | Dengue virus 2 | ELISPOT             | IFNg release | Positive     |
| 167732  | DQAEISGSSPILSITISEDG | NS2b | 63   | 82   | HLA-DP                    | Dengue virus 2 | ELISPOT             | IFNg release | Positive     |
| 195239  | EEQTLTILIRTGILLV     | NS2b | 91   | 105  | HLA-DRB1*15:01            | Dengue virus 2 | ELISPOT             | IFNg release | Positive     |
| 195512  | IMAVGMMVSIASSLL      | NS2b | 8    | 22   | HLA-DRB1*07:01            | Dengue virus 2 | ELISPOT             | IFNg release | Positive     |
| 195723  | LTLIRTGILLVISGL      | NS2b | 1440 | 1454 | HLA-DRB1*15:06            | Dengue virus 2 | ELISPOT             | IFNg release | Positive     |
| 195869  | QTLTILIRTGILLVIS     | NS2b | 1438 | 1452 | HLA-DRB1*15:01            | Dengue virus 2 | ELISPOT             | IFNg release | Positive     |
| 195913  | RTGLLVISGVPFVSI      | NS2b | 1445 | 1459 | HLA-DRB1*08:02            | Dengue virus 2 | ELISPOT             | IFNg release | Positive     |
| 195992  | SSLLKNDIPMTGPLV      | NS2b | 19   | 33   | HLA-DRB1*03:01            | Dengue virus 2 | ELISPOT             | IFNg release | Positive     |
| 539574  | LIRTGILLVISGVPFV     | NS2b | 1443 | 1457 | HLA-DRB1*13:01            | Dengue virus 2 | ELISPOT             | IFNg release | Positive     |
| 866986  | GMVSIASSLLKNDI       | NS2b | 1357 | 1371 | HLA-DPB1*01:01            | Dengue virus 2 | ELISPOT             | IFNg release | Positive     |
| 1067121 | GKVVGLYGNVGVTRS      | NS3  | 1619 | 1633 | HLA-DRB1*15:01            | Dengue virus 2 | ELISPOT             | IFNg release | Positive     |
| 12372   | EHTGREIVDLMCHAT      | NS3  | 250  | 264  | HLA class II              | Dengue virus 2 | ELISPOT             | IFNg release | Positive     |
| 12606   | EIVDLMCHATFTMRL      | NS3  | 255  | 269  | HLA class II              | Dengue virus 2 | ELISPOT             | IFNg release | Positive     |
| 1392191 | GREIVDLMCHATFTM      | NS3  | 1728 | 1742 |                           | Dengue virus 2 | biological activity | activation   | Positive     |
| 139758  | GKTKRYLPAIVREAI      | NS3  | 1673 | 1687 | HLA-DRB1*09:01            | Dengue virus 2 | ELISPOT             | IFNg release | Positive     |
| 139762  | GLPIRYQTPAIRAEH      | NS3  | 1712 | 1726 | HLA-DRB1*04:03            | Dengue virus 2 | ELISPOT             | IFNg release | Positive     |
| 180698  | PNYNLIIMDEAHFTD      | NS3  | 1751 | 1765 | HLA class II              | Dengue virus 2 | ELISPOT             | IFNg release | Positive     |
| 180807  | VTDFKGTWVWFVPSI      | NS3  | 1826 | 1840 | HLA class II              | Dengue virus 2 | ELISPOT             | IFNg release | Positive-Low |
| 195154  | ALRGLPIRYQTPAIR      | NS3  | 1709 | 1723 | HLA-DRB1*08:02            | Dengue virus 2 | ELISPOT             | IFNg release | Positive     |
| 195295  | FHTMWHVTRGAVLHM      | NS3  | 1521 | 1535 | HLA-DRB1*07:01            | Dengue virus 2 | ELISPOT             | IFNg release | Positive     |
| 195420  | GTFTMWHVTRGAVL       | NS3  | 1519 | 1533 | HLA-DRB1*07:01            | Dengue virus 2 | ELISPOT             | IFNg release | Positive     |
| 195564  | KGKVVGLYGNVGVTR      | NS3  | 1618 | 1632 | HLA-DRB1*15:01            | Dengue virus 2 | ELISPOT             | IFNg release | Positive     |
| 195765  | MRLLSPVRVPPNYNLI     | NS3  | 1742 | 1756 | HLA-DRB1*13:01            | Dengue virus 2 | ELISPOT             | IFNg release | Positive     |
| 195888  | RLGLTLILAPTRVVA      | NS3  | 1689 | 1703 | HLA-DRB1*08:02            | Dengue virus 2 | ELISPOT             | IFNg release | Positive     |
| 21115   | GLRTLILAPTRVVAA      | NS3  | 1690 | 1704 | HLA-DRB1*04:03            | Dengue virus 2 | ELISPOT             | IFNg release | Positive     |
| 24916   | HTGREIVDLMCHATE      | NS3  | 251  | 265  | HLA-DPw2                  | Dengue virus 2 | ICS                 | IFNg release | Positive     |
| 26965   | ILAPTRVVAAMEEEA      | NS3  | 1695 | 1709 | HLA-DQA1*03:01/DQB1*03:02 | Dengue virus 2 | ELISPOT             | IFNg release | Positive     |
| 30396   | KEGERKKLPRWLDA       | NS3  | 584  | 598  | HLA class II              | Dengue virus 2 | ICS                 | IFNg release | Positive     |
| 31726   | KKVILQSRKTFDSEY      | NS3  | 1855 | 1869 | HLA-DRB1*12:02            | Dengue virus 2 | ELISPOT             | IFNg release | Positive     |
| 34231   | KVVGLYGNVGVTRSG      | NS3  | 145  | 159  | HLA class II              | Dengue virus 2 | ELISPOT             | IFNg release | Positive     |
| 36560   | LIIIMDEAHFTDPASI     | NS3  | 1755 | 1769 | HLA-DQA1*01:01/DQB1*05:01 | Dengue virus 2 | ELISPOT             | IFNg release | Positive     |
| 39103   | LRGLPIRYQTPAIRA      | NS3  | 1696 | 1710 | HLA-DRB1*14:02            | Dengue virus 2 | ELISPOT             | IFNg release | Positive     |
| 39225   | LRTLILAPTRVVAAE      | NS3  | 1691 | 1705 | HLA-DRB1*12:02            | Dengue virus 2 | ELISPOT             | IFNg release | Positive     |
| 4152    | ARGYSTRVEMGEAA       | NS3  | 1757 | 1771 | HLA-DRB1*04:07            | Dengue virus 2 | ELISPOT             | IFNg release | Positive     |
| 49766   | PTRVVAAMEEALRG       | NS3  | 223  | 237  | HLA-DRB1*15:01            | Dengue virus 2 | ICS                 | IFNg release | Positive     |
| 539025  | AAGIFMTATPPGSRD      | NS3  | 1784 | 1798 | HLA-DRB1*04:03            | Dengue virus 2 | ELISPOT             | IFNg release | Positive     |
| 539041  | AEMEELRGLPIRYQ       | NS3  | 1704 | 1718 | HLA-DRB1*13:01            | Dengue virus 2 | ELISPOT             | IFNg release | Positive     |
| 539200  | EDDIFRKKRLTIMDL      | NS3  | 1654 | 1668 | HLA-DRB1*13:01            | Dengue virus 2 | ELISPOT             | IFNg release | Positive     |
| 539203  | EEVRILAGPMPVTHS      | NS3  | 1899 | 1913 | HLA-DRB1*09:01            | Dengue virus 2 | ELISPOT             | IFNg release | Positive     |
| 539283  | GAYRIKQRGILGVSQ      | NS3  | 1496 | 1510 | HLA-DRB1*08:03            | Dengue virus 2 | ELISPOT             | IFNg release | Positive     |
| 539289  | GEAAGIFMTATPPGS      | NS3  | 1782 | 1796 | HLA-DRB1*04:03            | Dengue virus 2 | ELISPOT             | IFNg release | Positive     |
| 539448  | IVREAIKRLRTLIL       | NS3  | 1682 | 1696 | HLA-DRB1*12:02            | Dengue virus 2 | ELISPOT             | IFNg release | Positive     |
| 539467  | KGKTVWFVPSIKAGN      | NS3  | 1830 | 1844 | HLA-DRB1*08:03            | Dengue virus 2 | ELISPOT             | IFNg release | Positive     |
| 539573  | LILAPTRVVAAMEEE      | NS3  | 1694 | 1708 | HLA-DRB1*13:01            | Dengue virus 2 | ELISPOT             | IFNg release | Positive     |
| 539713  | NGKKVILQSRKTFDS      | NS3  | 1853 | 1867 | HLA-DRB1*12:02            | Dengue virus 2 | ELISPOT             | IFNg release | Positive     |
| 539850  | RLGLPIRYQTPAIRAE     | NS3  | 1711 | 1725 | HLA-DRB1*13:01            | Dengue virus 2 | ELISPOT             | IFNg release | Positive     |
| 539857  | RKNGKVKIQLSRKTF      | NS3  | 1851 | 1865 | HLA-DRB1*08:03            | Dengue virus 2 | ELISPOT             | IFNg release | Positive     |
| 540056  | VLMHKKGRIEPSWAD      | NS3  | 1518 | 1532 | HLA-DRB1*13:01            | Dengue virus 2 | ELISPOT             | IFNg release | Positive     |
| 54390   | RKLTIMDLHPGAGKT      | NS3  | 618  | 632  | HLA class II              | Dengue virus 2 | ICS                 | IFNg release | Positive     |
| 63672   | TFHTMWHVTRGAVLM      | NS3  | 45   | 59   | HLA class II              | Dengue virus 2 | ELISPOT             | IFNg release | Positive     |
| 64666   | TKRYLPAIVREAIKR      | NS3  | 200  | 214  | HLA class II              | Dengue virus 2 | ELISPOT             | IFNg release | Positive     |
| 739148  | IDKKGKVVGLYGNV       | NS3  | 1615 | 1629 | HLA-DRB1*01:02            | Dengue virus 2 | ELISPOT             | IFNg release | Positive     |



|         |                      |      |      |      |                           |                |         |              |              |
|---------|----------------------|------|------|------|---------------------------|----------------|---------|--------------|--------------|
| 740081  | REAIKRLRLILAP        | NS3  | 1670 | 1684 | HLA-DRB1*14:06            | Dengue virus 2 | ELISPOT | IFNg release | Positive     |
| 740193  | RTLILAPTRVVAEM       | NS3  | 1678 | 1692 | HLA-DRB1*14:06            | Dengue virus 2 | ELISPOT | IFNg release | Positive     |
| 866477  | EALRGLPIRYQTPAI      | NS3  | 1708 | 1722 | HLA-DRB4*01:01            | Dengue virus 2 | ELISPOT | IFNg release | Positive     |
| 868183  | MWHTVRGAVLMHRGK      | NS3  | 1524 | 1538 | HLA-DRB3*02:02            | Dengue virus 2 | ELISPOT | IFNg release | Positive     |
| 868724  | RTNDWDFVTTDISE       | NS3  | 1873 | 1887 | HLA-DQA1*03:01/DQB1*03:02 | Dengue virus 2 | ELISPOT | IFNg release | Positive     |
| 868734  | RYLPAIVREAIKRL       | NS3  | 1677 | 1691 | HLA-DRB4*01:01            | Dengue virus 2 | ELISPOT | IFNg release | Positive     |
| 869224  | TLILAPTRVVAEME       | NS3  | 1693 | 1707 | HLA-DQA1*01:02/DQB1*06:02 | Dengue virus 2 | ELISPOT | IFNg release | Positive     |
| 8911    | DKKGKVVGLYGNVGV      | NS3  | 141  | 155  | HLA-DRB1*15:01            | Dengue virus 2 | ICS     | IFNg release | Positive     |
| 150192  | ETLLLLTLAAVTGG       | NS4a | 2146 | 2160 | HLA-DRB1*01:01            | Dengue virus 2 | ELISPOT | IFNg release | Positive     |
| 150362  | LETLLLLTLATVTG       | NS4a | 2145 | 2159 | HLA-DRB1*01:01            | Dengue virus 2 | ELISPOT | IFNg release | Positive     |
| 167780  | LTNLNITEMGRLPFTMTQKA | NS4a | 2    | 21   | HLA class II              | Dengue virus 2 | ELISPOT | IFNg release | Positive     |
| 195107  | AASIIIEFFLIVLLI      | NS4a | 2185 | 2199 | HLA-DRB1*15:01            | Dengue virus 2 | ELISPOT | IFNg release | Positive     |
| 195355  | GGIFLFLMSGKGIGK      | NS4a | 2145 | 2159 | HLA-DRB1*11:01            | Dengue virus 2 | ELISPOT | IFNg release | Positive     |
| 195356  | GGIFLFLMSGRGIGK      | NS4a | 2159 | 2173 | HLA-DRB1*11:01            | Dengue virus 2 | ELISPOT | IFNg release | Positive     |
| 195414  | GRAYNHALSELPETL      | NS4a | 2131 | 2145 | HLA-DRB1*04:01            | Dengue virus 2 | ELISPOT | IFNg release | Positive     |
| 195635  | LGMCCIITASILWY       | NS4a | 2176 | 2190 | HLA-DRB1*07:01            | Dengue virus 2 | ELISPOT | IFNg release | Positive     |
| 195767  | MTLGMCCIIITASIL      | NS4a | 2160 | 2174 | HLA-DRB1*07:01            | Dengue virus 2 | ELISPOT | IFNg release | Positive     |
| 195810  | NQLTYVVAIALTLVA      | NS4a | 2225 | 2239 | HLA-DRB1*07:01            | Dengue virus 2 | ELISPOT | IFNg release | Positive     |
| 196054  | TLETLLLLTLATVT       | NS4a | 2144 | 2158 | HLA-DRB1*15:01            | Dengue virus 2 | ELISPOT | IFNg release | Positive     |
| 196089  | TVTGGIFLFLMSGKG      | NS4a | 2142 | 2156 | HLA-DRB1*11:01            | Dengue virus 2 | ELISPOT | IFNg release | Positive     |
| 539609  | LPTFMTQKARNALDN      | NS4a | 2092 | 2106 | HLA-DRB1*10:01            | Dengue virus 2 | ELISPOT | IFNg release | Positive     |
| 539801  | QDNQLTYVVAIALTV      | NS4a | 2223 | 2237 | HLA-DRB1*15:02            | Dengue virus 2 | ELISPOT | IFNg release | Positive     |
| 539804  | QIQPHWIAASIIIEF      | NS4a | 2192 | 2206 | HLA-DRB1*13:01            | Dengue virus 2 | ELISPOT | IFNg release | Positive     |
| 540148  | YAIQIQPHWIAASII      | NS4a | 2176 | 2190 | HLA-DRB1*13:01            | Dengue virus 2 | ELISPOT | IFNg release | Positive     |
| 738567  | AYNHALSELPETLET      | NS4a | 2119 | 2133 | HLA-DRB1*04:07            | Dengue virus 2 | ELISPOT | IFNg release | Positive     |
| 150611  | TAALLLVVAHYAIG       | NS4b | 2351 | 2365 | HLA-DRB1*01:01            | Dengue virus 2 | ELISPOT | IFNg release | Positive     |
| 150636  | TLTAALLLVVAHYAI      | NS4b | 2335 | 2349 | HLA-DRB1*01:01            | Dengue virus 2 | ELISPOT | IFNg release | Positive     |
| 195115  | AGAGLLFSIMKNTTN      | NS4b | 2474 | 2488 | HLA-DRB1*11:01            | Dengue virus 2 | ELISPOT | IFNg release | Positive     |
| 195118  | AGLLFSIMRNTTSAR      | NS4b | 2476 | 2490 | HLA-DRB1*04:01            | Dengue virus 2 | ELISPOT | IFNg release | Positive     |
| 195270  | ESENILDILRPAS        | NS4b | 2265 | 2279 | HLA-DRB1*03:01            | Dengue virus 2 | ELISPOT | IFNg release | Positive     |
| 195347  | GAGLLFSIMKNTTNT      | NS4b | 2475 | 2489 | HLA-DRB1*11:01            | Dengue virus 2 | ELISPOT | IFNg release | Positive     |
| 195387  | GLLFFIMKNTTNR        | NS4b | 2477 | 2491 | HLA-DRB1*04:01            | Dengue virus 2 | ELISPOT | IFNg release | Positive     |
| 195393  | GLLFSIMKNTANTRR      | NS4b | 2463 | 2477 | HLA-DRB1*04:01            | Dengue virus 2 | ELISPOT | IFNg release | Positive     |
| 195394  | GLLFSIMKNTNARR       | NS4b | 2477 | 2491 | HLA-DRB1*04:01            | Dengue virus 2 | ELISPOT | IFNg release | Positive     |
| 195395  | GLLFSIMKNTTNSRR      | NS4b | 2477 | 2491 | HLA-DRB1*04:01            | Dengue virus 2 | ELISPOT | IFNg release | Positive     |
| 195396  | GLLFSIMKNTTSARR      | NS4b | 2477 | 2491 | HLA-DRB1*04:01            | Dengue virus 2 | ELISPOT | IFNg release | Positive     |
| 195397  | GLLFSIMKNTTSTRR      | NS4b | 2477 | 2491 | HLA-DRB1*04:01            | Dengue virus 2 | ELISPOT | IFNg release | Positive     |
| 195398  | GLLFSVMKNTTNR        | NS4b | 2477 | 2491 | HLA-DRB1*04:01            | Dengue virus 2 | ELISPOT | IFNg release | Positive     |
| 195621  | LCVTVQLMMRTTWA       | NS4b | 2405 | 2419 | HLA-DRB1*07:01            | Dengue virus 2 | ELISPOT | IFNg release | Positive     |
| 195629  | LFSIMKNTTNRRTG       | NS4b | 2479 | 2493 | HLA-DRB1*03:01            | Dengue virus 2 | ELISPOT | IFNg release | Positive     |
| 195658  | LLFSIMKNTTNR         | NS4b | 2478 | 2492 | HLA-DRB1*04:01            | Dengue virus 2 | ELISPOT | IFNg release | Positive     |
| 195659  | LLFSIMRNTTTARRG      | NS4b | 2478 | 2492 | HLA-DRB1*04:01            | Dengue virus 2 | ELISPOT | IFNg release | Positive     |
| 195718  | LTAAFLVVAHYAI        | NS4b | 2350 | 2364 | HLA-DRB1*07:01            | Dengue virus 2 | ELISPOT | IFNg release | Positive     |
| 195827  | PESNILDILRPASA       | NS4b | 2266 | 2280 | HLA-DRB1*03:01            | Dengue virus 2 | ELISPOT | IFNg release | Positive     |
| 195882  | RFWNTTIAVSMANIF      | NS4b | 2454 | 2468 | HLA-DRB1*07:01            | Dengue virus 2 | ELISPOT | IFNg release | Positive     |
| 195974  | SNILDILRPASAWT       | NS4b | 2155 | 2169 | HLA-DRB1*03:01            | Dengue virus 2 | ELISPOT | IFNg release | Positive     |
| 195980  | SQVNPITLTAALLL       | NS4b | 2343 | 2357 | HLA-DQA1*01:02/DQB1*06:02 | Dengue virus 2 | ELISPOT | IFNg release | Positive     |
| 539327  | GLLFSIMKNTTNR        | NS4b | 2477 | 2491 | HLA-DRB1*14:02            | Dengue virus 2 | ELISPOT | IFNg release | Positive     |
| 539724  | NIFRGSYLAGAGLLF      | NS4b | 2452 | 2466 | HLA-DRB1*09:01            | Dengue virus 2 | ELISPOT | IFNg release | Positive     |
| 539755  | PASAWTLVAVATTFV      | NS4b | 2277 | 2291 | HLA-DRB1*09:01            | Dengue virus 2 | ELISPOT | IFNg release | Positive     |
| 739437  | LDIDLRPASAWTLYA      | NS4b | 2257 | 2271 | HLA-DRB1*01:02            | Dengue virus 2 | ELISPOT | IFNg release | Positive     |
| 866802  | FWNTTIAVSMANIF       | NS4b | 2455 | 2469 | HLA-DQA1*01:02/DQB1*06:02 | Dengue virus 2 | ELISPOT | IFNg release | Positive     |
| 867335  | ITLTAALLLIAHYA       | NS4b | 2348 | 2362 | HLA-DPB1*04:02            | Dengue virus 2 | ELISPOT | IFNg release | Positive     |
| 867709  | LILCVTVQLMMRTTW      | NS4b | 2417 | 2431 | HLA-DPB1*04:02            | Dengue virus 2 | ELISPOT | IFNg release | Positive     |
| 867860  | LLVLCVTVQLMMRTT      | NS4b | 2416 | 2430 | HLA-DPB1*04:02            | Dengue virus 2 | ELISPOT | IFNg release | Positive     |
| 869089  | TAIANQATVLMGLGK      | NS4b | 2309 | 2323 | HLA-DQA1*01:02/DQB1*06:02 | Dengue virus 2 | ELISPOT | IFNg release | Positive     |
| 869090  | TAIANQATVLMGLGR      | NS4b | 2309 | 2323 | HLA-DQA1*01:02/DQB1*06:02 | Dengue virus 2 | ELISPOT | IFNg release | Positive     |
| 1066545 | ACLGKSYAQMWLSLMY     | NS5  | 3243 | 3257 | HLA-DRB1*04:01            | Dengue virus 2 | ELISPOT | IFNg release | Positive-Low |
| 150597  | SRAIWYMWVLGARFLE     | NS5  | 2962 | 2976 | HLA-DRB1*01:01            | Dengue virus 2 | ELISPOT | IFNg release | Positive     |
| 167817  | SRLNALGKSEFQI        | NS5  | 15   | 27   | HLA class II              | Dengue virus 2 | ELISPOT | IFNg release | Positive     |
| 180579  | KSYAQMWLSLMYFHR      | NS5  | 3247 | 3261 | HLA-DRB5*01:01            | Dengue virus 2 | ELISPOT | IFNg release | Positive     |
| 180582  | KTWAYHGSYETKQTG      | NS5  | 2792 | 2806 | HLA class II              | Dengue virus 2 | ICS     | IFNg release | Positive     |
| 190862  | MVTQAMAMDTTTPFGQQR   | NS5  | 2828 | 2844 | HLA class II              | Dengue virus 2 | ICS     | IFNg release | Positive     |
| 195111  | ACLGKSYAQMWTLMY      | NS5  | 3243 | 3257 | HLA-DRB1*04:01            | Dengue virus 2 | ELISPOT | IFNg release | Positive     |
| 195200  | CETCVYNNMMGKREK      | NS5  | 2924 | 2938 | HLA-DRB1*11:01            | Dengue virus 2 | ELISPOT | IFNg release | Positive     |
| 195213  | DELIGRARISQAGAW      | NS5  | 3223 | 3237 | HLA-DRB1*08:02            | Dengue virus 2 | ELISPOT | IFNg release | Positive     |
| 195233  | EDHWFSRENSLGSVE      | NS5  | 2985 | 2999 | HLA-DRB1*04:01            | Dengue virus 2 | ELISPOT | IFNg release | Positive     |
| 195241  | EGEGVFKSIQHLTVT      | NS5  | 3101 | 3115 | HLA-DRB1*07:01            | Dengue virus 2 | ELISPOT | IFNg release | Positive     |
| 195250  | ELIMKDGKLVVPCR       | NS5  | 3206 | 3220 | HLA-DRB1*03:01            | Dengue virus 2 | ELISPOT | IFNg release | Positive     |
| 195251  | ELIMKDGKLVVPCR       | NS5  | 3206 | 3220 | HLA-DRB1*03:01            | Dengue virus 2 | ELISPOT | IFNg release | Positive     |
| 195380  | GKSYAQMWLSLMYFHR     | NS5  | 3232 | 3246 | HLA-DRB1*04:01            | Dengue virus 2 | ELISPOT | IFNg release | Positive     |
| 195384  | GLFKSIQHLTSQEEI      | NS5  | 3118 | 3132 | HLA-DRB1*11:01            | Dengue virus 2 | ELISPOT | IFNg release | Positive     |
| 195409  | GNIVSSVNMISRMIL      | NS5  | 2717 | 2731 | HLA-DRB1*07:01            | Dengue virus 2 | ELISPOT | IFNg release | Positive     |
| 195428  | GTVMIDIISRRDQRGS     | NS5  | 3078 | 3092 | HLA-DRB1*03:01            | Dengue virus 2 | ELISPOT | IFNg release | Positive     |
| 195445  | HFHELIMKDGRILVV      | NS5  | 3203 | 3217 | HLA-DRB1*03:01            | Dengue virus 2 | ELISPOT | IFNg release | Positive     |
| 195446  | HFHELVMKDGRVLVV      | NS5  | 3203 | 3217 | HLA-DRB1*13:01            | Dengue virus 2 | ELISPOT | IFNg release | Positive     |
| 195460  | HRGLYILRDVSRKEG      | NS5  | 3004 | 3018 | HLA-DRB1*08:02            | Dengue virus 2 | ELISPOT | IFNg release | Positive     |
| 195513  | IMKDGRKLVVPCRNQ      | NS5  | 3207 | 3221 | HLA-DRB1*03:01            | Dengue virus 2 | ELISPOT | IFNg release | Positive     |
| 195640  | LGYLIRDVSKKEGGA      | NS5  | 2992 | 3006 | HLA-DRB1*03:01            | Dengue virus 2 | ELISPOT | IFNg release | Positive     |
| 195642  | LHKLGYILRDVSKKE      | NS5  | 3003 | 3017 | HLA-DRB1*08:02            | Dengue virus 2 | ELISPOT | IFNg release | Positive     |
| 195750  | MEGEGIFKSIQHLTA      | NS5  | 3114 | 3128 | HLA-DRB1*11:01            | Dengue virus 2 | ELISPOT | IFNg release | Positive     |
| 195759  | MLINRFTMKHKKATY      | NS5  | 2729 | 2743 | HLA-DRB1*11:01            | Dengue virus 2 | ELISPOT | IFNg release | Positive     |
| 195800  | NMISRMILINRFTMKH     | NS5  | 2724 | 2738 | HLA-DRB1*08:02            | Dengue virus 2 | ELISPOT | IFNg release | Positive     |
| 195801  | NMISRMILINRFTMRH     | NS5  | 6    | 20   | HLA-DRB1*08:02            | Dengue virus 2 | ELISPOT | IFNg release | Positive     |
| 195948  | SGNIVSSVNMISRMIL     | NS5  | 2716 | 2730 | HLA-DRB1*04:01            | Dengue virus 2 | ELISPOT | IFNg release | Positive     |
| 196040  | TGNIVSSVNMISRMIL     | NS5  | 2716 | 2730 | HLA-DRB1*04:01            | Dengue virus 2 | ELISPOT | IFNg release | Positive     |
| 196161  | VNMISRMILINRFTMR     | NS5  | 2723 | 2737 | HLA-DRB1*10:01            | Dengue virus 2 | ELISPOT | IFNg release | Positive     |
| 196187  | VSSVNMISRMILINRF     | NS5  | 2720 | 2734 | HLA-DRB1*15:01            | Dengue virus 2 | ELISPOT | IFNg release | Positive     |



|        |                   |     |      |      |                           |                |         |              |          |
|--------|-------------------|-----|------|------|---------------------------|----------------|---------|--------------|----------|
| 196210 | WAKNIQTAINQVRS    | NS5 | 3336 | 3350 | HLA-DRB1*03:01            | Dengue virus 2 | ELISPOT | IFNg release | Positive |
| 196223 | WSLMYFHRRDLRLAA   | NS5 | 3253 | 3267 | HLA-DRB1*03:01            | Dengue virus 2 | ELISPOT | IFNg release | Positive |
| 196225 | WTLMYFHRRDLRLAA   | NS5 | 3253 | 3267 | HLA-DRB1*03:01            | Dengue virus 2 | ELISPOT | IFNg release | Positive |
| 196243 | YQNKVVRVQRPTPRG   | NS5 | 3064 | 3078 | HLA-DRB1*08:02            | Dengue virus 2 | ELISPOT | IFNg release | Positive |
| 32939  | KPWDIIPMV         | NS5 | 2821 | 2829 | HLA class II              | Dengue virus 2 | ELISA   | IL-2 release | Positive |
| 32941  | KPWDVLPV          | NS5 | 2821 | 2829 | HLA class II              | Dengue virus 2 | ELISA   | IL-2 release | Positive |
| 32942  | KPWDVLPV          | NS5 | 2821 | 2829 | HLA class II              | Dengue virus 2 | ELISA   | IL-2 release | Positive |
| 32943  | KPWDVVPV          | NS5 | 2821 | 2829 | HLA class II              | Dengue virus 2 | ELISA   | IL-2 release | Positive |
| 539144 | CVVKPLDDRFASALTAL | NS5 | 3156 | 3172 | HLA class II              | Dengue virus 2 | ICS     | IFNg release | Positive |
| 539150 | DDRFASALTALNDMG   | NS5 | 3162 | 3176 | HLA-DRB1*04:03            | Dengue virus 2 | ELISPOT | IFNg release | Positive |
| 539161 | DHWFSRGNSLSGVEG   | NS5 | 2986 | 3000 | HLA-DRB1*09:01            | Dengue virus 2 | ELISPOT | IFNg release | Positive |
| 539195 | EAIFKLTQYQNKVVRV  | NS5 | 3057 | 3071 | HLA-DRB1*09:01            | Dengue virus 2 | ELISPOT | IFNg release | Positive |
| 539348 | GSALKRWFVERNMV    | NS5 | 2549 | 2563 | HLA-DRB1*09:01            | Dengue virus 2 | ELISPOT | IFNg release | Positive |
| 539436 | ISGDDCVVKPLDDRF   | NS5 | 3151 | 3166 | HLA class II              | Dengue virus 2 | ICS     | IFNg release | Positive |
| 539438 | ISRMLINRFTMRHKK   | NS5 | 8    | 22   | HLA-DRB1*14:02            | Dengue virus 2 | ELISPOT | IFNg release | Positive |
| 539560 | LGKNEFQIYKSGIQ    | NS5 | 2511 | 2525 | HLA-DRB1*15:02            | Dengue virus 2 | ELISPOT | IFNg release | Positive |
| 539599 | LMYFHRRDLRLAANA   | NS5 | 3255 | 3269 | HLA-DRB1*13:01            | Dengue virus 2 | ELISPOT | IFNg release | Positive |
| 539603 | LNTFTNMEAQLIRQM   | NS5 | 3100 | 3114 | HLA-DRB1*10:01            | Dengue virus 2 | ELISPOT | IFNg release | Positive |
| 539668 | MISRMLINRFTMKHK   | NS5 | 2725 | 2739 | HLA-DRB1*14:04            | Dengue virus 2 | ELISPOT | IFNg release | Positive |
| 539669 | MISRMLINRFTMRHK   | NS5 | 7    | 21   | HLA-DRB1*14:06            | Dengue virus 2 | ELISPOT | IFNg release | Positive |
| 539871 | RRDLRLAANAICSAV   | NS5 | 3260 | 3274 | HLA-DRB3*02:02            | Dengue virus 2 | ELISPOT | IFNg release | Positive |
| 539932 | SRMLINRFTMKHKA    | NS5 | 2727 | 2741 | HLA-DRB1*08:03            | Dengue virus 2 | ELISPOT | IFNg release | Positive |
| 540064 | VNGVVRLLTKPVDVI   | NS5 | 2812 | 2826 | HLA-DRB1*12:02            | Dengue virus 2 | ELISPOT | IFNg release | Positive |
| 540065 | VNGVVRLLTKPVDV    | NS5 | 2812 | 2826 | HLA-DRB1*12:02            | Dengue virus 2 | ELISPOT | IFNg release | Positive |
| 540066 | VNMISRMLINRFTMK   | NS5 | 2723 | 2737 | HLA-DRB1*12:02            | Dengue virus 2 | ELISPOT | IFNg release | Positive |
| 738754 | EEFTRKVRNSAALGA   | NS5 | 2874 | 2888 | HLA-DRB1*11:04            | Dengue virus 2 | ELISPOT | IFNg release | Positive |
| 739166 | IFKLTQYQNKVVRVQR  | NS5 | 3045 | 3059 | HLA-DRB1*14:06            | Dengue virus 2 | ELISPOT | IFNg release | Positive |
| 739791 | NLVRQLSGVDVFFTP   | NS5 | 2599 | 2613 | HLA-DRB1*01:02            | Dengue virus 2 | ELISPOT | IFNg release | Positive |
| 740675 | VRNSAALGAIFTDEN   | NS5 | 2880 | 2894 | HLA-DRB1*11:04            | Dengue virus 2 | ELISPOT | IFNg release | Positive |
| 866015 | AIWYMWLGARFLEFE   | NS5 | 2964 | 2978 | HLA-DPB1*01:01            | Dengue virus 2 | ELISPOT | IFNg release | Positive |
| 866172 | ASGNIVSSVNMISRM   | NS5 | 2715 | 2729 | HLA-DRB3*02:02            | Dengue virus 2 | ELISPOT | IFNg release | Positive |
| 866566 | EKKLAIAIFKLTQYQ   | NS5 | 3051 | 3065 | HLA-DPB1*01:01            | Dengue virus 2 | ELISPOT | IFNg release | Positive |
| 866648 | ETCVYNMMGKREKKL   | NS5 | 2939 | 2953 | HLA-DRB5*01:01            | Dengue virus 2 | ELISPOT | IFNg release | Positive |
| 867419 | KKLAIAIFKLTQYQNK  | NS5 | 3053 | 3067 | HLA-DPB1*02:01            | Dengue virus 2 | ELISPOT | IFNg release | Positive |
| 867433 | KLAIAIFKLTQYQNKV  | NS5 | 3054 | 3068 | HLA-DPB1*02:01            | Dengue virus 2 | ELISPOT | IFNg release | Positive |
| 867514 | KTPVESWEEIPYLGK   | NS5 | 3318 | 3332 | HLA-DQA1*01:01/DQB1*05:01 | Dengue virus 2 | ELISPOT | IFNg release | Positive |
| 867600 | LEFEALGFLNEDHWF   | NS5 | 2975 | 2989 | HLA-DPB1*04:01            | Dengue virus 2 | ELISPOT | IFNg release | Positive |
| 868637 | RDLRLAANAICSAVP   | NS5 | 3261 | 3275 | HLA-DQA1*05:01/DQB1*02:01 | Dengue virus 2 | ELISPOT | IFNg release | Positive |
| 868640 | RFLEFEALGFLNEDH   | NS5 | 2973 | 2987 | HLA-DPB1*01:01            | Dengue virus 2 | ELISPOT | IFNg release | Positive |
| 868668 | RKVRNSAALGAIFTD   | NS5 | 2892 | 2906 | HLA-DRB3*02:02            | Dengue virus 2 | ELISPOT | IFNg release | Positive |
| 869082 | SYAQMWSLMYFHRRD   | NS5 | 3248 | 3262 | HLA-DPB1*04:01            | Dengue virus 2 | ELISPOT | IFNg release | Positive |
| 869083 | SYAQMWTLMYFHRRD   | NS5 | 3248 | 3262 | HLA-DPB1*04:01            | Dengue virus 2 | ELISPOT | IFNg release | Positive |
| 869148 | TFVESWEDIPYLGKR   | NS5 | 3319 | 3333 | HLA-DQA1*01:01/DQB1*05:01 | Dengue virus 2 | ELISPOT | IFNg release | Positive |
| 869292 | TPVESWEEVPYLGKR   | NS5 | 3319 | 3333 | HLA-DQA1*01:01/DQB1*05:01 | Dengue virus 2 | ELISPOT | IFNg release | Positive |
| 869307 | TRKVRNSAALGAIFT   | NS5 | 2891 | 2905 | HLA-DRB3*02:02            | Dengue virus 2 | ELISPOT | IFNg release | Positive |
| 869426 | VESWEEIPYLGKRED   | NS5 | 3321 | 3335 | HLA-DQA1*01:01/DQB1*05:01 | Dengue virus 2 | ELISPOT | IFNg release | Positive |



CD4 DENV-3 Epitopes

| Epitope_ID | AminoAcid_Seq        | Protein_Name | Start | End | Allele                    | Serotype       | Method/Technique | Assay Group  | Qualitative Measure |
|------------|----------------------|--------------|-------|-----|---------------------------|----------------|------------------|--------------|---------------------|
| 1068391    | TGKPSINMLKRVNR       | C            | 8     | 22  | HLA-DRB1*11:01            | Dengue virus 3 | ELISPOT          | IFNg release | Positive-Low        |
| 195205     | CLMMMLPATLAFHLT      | C            | 104   | 118 | HLA-DRB1*15:01            | Dengue virus 3 | ELISPOT          | IFNg release | Positive            |
| 195289     | FCLMMMLPATLAFHL      | C            | 103   | 117 | HLA-DRB1*01:01            | Dengue virus 3 | ELISPOT          | IFNg release | Positive            |
| 195303     | FKKEISNMLSINKR       | C            | 37    | 51  | HLA-DRB1*04:01            | Dengue virus 3 | ELISPOT          | IFNg release | Positive            |
| 195306     | FLRFLAIPPTAGVLA      | C            | 6     | 20  | HLA-DRB1*01:01            | Dengue virus 3 | ELISPOT          | IFNg release | Positive            |
| 195469     | IAFLRFLAIPPTAGV      | C            | 4     | 18  | HLA-DRB1*04:01            | Dengue virus 3 | ELISPOT          | IFNg release | Positive            |
| 195497     | IKVLKGFKKEISNML      | C            | 31    | 45  | HLA-DRB1*04:01            | Dengue virus 3 | ELISPOT          | IFNg release | Positive            |
| 195517     | INMLKRVNRNVSTGP      | C            | 13    | 27  | HLA-DRB1*08:02            | Dengue virus 3 | ELISPOT          | IFNg release | Positive            |
| 195518     | INMLKRVNRNVSTGS      | C            | 13    | 27  | HLA-DRB1*08:02            | Dengue virus 3 | ELISPOT          | IFNg release | Positive            |
| 195519     | INMLKRVNRNVSTGT      | C            | 13    | 27  | HLA-DRB1*08:02            | Dengue virus 3 | ELISPOT          | IFNg release | Positive            |
| 195536     | ISNMLSINKRKKT        | C            | 41    | 55  | HLA-DRB1*11:01            | Dengue virus 3 | ELISPOT          | IFNg release | Positive            |
| 195559     | KEISNMLSINKRK        | C            | 39    | 53  | HLA-DRB1*04:01            | Dengue virus 3 | ELISPOT          | IFNg release | Positive            |
| 195597     | KTSLCLMMILPAALA      | C            | 53    | 67  | HLA-DRB1*01:01            | Dengue virus 3 | ELISPOT          | IFNg release | Positive            |
| 195598     | KTSLCLVMILPAALA      | C            | 100   | 114 | HLA-DRB1*01:01            | Dengue virus 3 | ELISPOT          | IFNg release | Positive            |
| 195611     | LARWGTFKKSGAIKV      | C            | 19    | 33  | HLA-DRB1*07:01            | Dengue virus 3 | ELISPOT          | IFNg release | Positive            |
| 195618     | LCLMMIMPAAALFHL      | C            | 103   | 117 | HLA-DRB1*01:01            | Dengue virus 3 | ELISPOT          | IFNg release | Positive            |
| 195649     | LKGFKKEISNLSII       | C            | 34    | 48  | HLA-DRB1*07:01            | Dengue virus 3 | ELISPOT          | IFNg release | Positive            |
| 195803     | NMLKRVNRNVSTGPQ      | C            | 14    | 28  | HLA-DRB1*11:01            | Dengue virus 3 | ELISPOT          | IFNg release | Positive            |
| 195961     | SINMLKRVNRNVSTG      | C            | 12    | 26  | HLA-DRB1*08:02            | Dengue virus 3 | ELISPOT          | IFNg release | Positive            |
| 195966     | SLCLMMIMPAAALFH      | C            | 102   | 116 | HLA-DRB1*08:02            | Dengue virus 3 | ELISPOT          | IFNg release | Positive            |
| 195967     | SLCLMMMLPATLAFH      | C            | 102   | 116 | HLA-DRB1*08:02            | Dengue virus 3 | ELISPOT          | IFNg release | Positive            |
| 36858      | LKGFKKEISNML         | C            | 81    | 92  | HLA-DPw4                  | Dengue virus 3 | ICS              | IFNg release | Positive            |
| 539277     | GAIKVLKGFKKEISN      | C            | 29    | 43  | HLA-DRB1*12:02            | Dengue virus 3 | ELISPOT          | IFNg release | Positive            |
| 539447     | IVNRRKKTSLCLMMM      | C            | 94    | 108 | HLA-DRB1*13:01            | Dengue virus 3 | ELISPOT          | IFNg release | Positive            |
| 539502     | KPSINMLKRVNRNVS      | C            | 10    | 24  | HLA-DRB1*08:03            | Dengue virus 3 | ELISPOT          | IFNg release | Positive            |
| 539512     | KSGAIKVLKGFKKEI      | C            | 27    | 41  | HLA-DRB1*12:02            | Dengue virus 3 | ELISPOT          | IFNg release | Positive            |
| 539787     | PSINMLKRVNRNVST      | C            | 11    | 25  | HLA-DRB1*14:04            | Dengue virus 3 | ELISPOT          | IFNg release | Positive            |
| 539897     | SGAIKVLKGFKKEIS      | C            | 28    | 42  | HLA-DRB1*14:04            | Dengue virus 3 | ELISPOT          | IFNg release | Positive            |
| 539906     | SIINRRKRTSLCLMM      | C            | 93    | 107 | HLA-DRB1*13:01            | Dengue virus 3 | ELISPOT          | IFNg release | Positive            |
| 539926     | SNMLSINKRKKTSL       | C            | 42    | 56  | HLA-DRB1*12:02            | Dengue virus 3 | ELISPOT          | IFNg release | Positive            |
| 540118     | WGSFKKSGAVKVLRG      | C            | 69    | 83  | HLA-DRB1*09:01            | Dengue virus 3 | ELISPOT          | IFNg release | Positive            |
| 540119     | WGTFKKLGAIKVLKG      | C            | 69    | 83  | HLA-DRB1*09:01            | Dengue virus 3 | ELISPOT          | IFNg release | Positive            |
| 540120     | WGTFKKLGAIKVLRG      | C            | 69    | 83  | HLA-DRB1*09:01            | Dengue virus 3 | ELISPOT          | IFNg release | Positive            |
| 540121     | WGTFKKSGAIKVLKG      | C            | 22    | 36  | HLA-DRB1*09:01            | Dengue virus 3 | ELISPOT          | IFNg release | Positive            |
| 540122     | WGTFKKSGAIKVLKS      | C            | 69    | 83  | HLA-DRB1*09:01            | Dengue virus 3 | ELISPOT          | IFNg release | Positive            |
| 540123     | WGTFKKSGAIKVLRG      | C            | 69    | 83  | HLA-DRB1*09:01            | Dengue virus 3 | ELISPOT          | IFNg release | Positive            |
| 540124     | WGTFKKSGAIRVLRG      | C            | 69    | 83  | HLA-DRB1*09:01            | Dengue virus 3 | ELISPOT          | IFNg release | Positive            |
| 591709     | LRGFKKEISNLSII       | C            | 81    | 95  | HLA-DRB1*13:02            | Dengue virus 3 | ELISPOT          | IFNg release | Positive            |
| 591723     | NMLSINKRKKTSLC       | C            | 90    | 104 | HLA-DRB1*11:01            | Dengue virus 3 | ELISPOT          | IFNg release | Positive            |
| 591746     | RGFKKEISNLSIIN       | C            | 82    | 96  | HLA-DRB1*04:01            | Dengue virus 3 | ELISPOT          | IFNg release | Positive            |
| 738443     | AFLRFLAIPPTAGVL      | C            | 52    | 66  | HLA-DRB1*04:07            | Dengue virus 3 | ELISPOT          | IFNg release | Positive            |
| 740207     | RWGTFKKSGAIKVLK      | C            | 68    | 82  | HLA-DRB1*14:02            | Dengue virus 3 | ELISPOT          | IFNg release | Positive            |
| 867744     | LKSFKKEISNLSI        | C            | 81    | 95  | HLA-DRB3*02:02            | Dengue virus 3 | ELISPOT          | IFNg release | Positive            |
| 867909     | LRGFKKEISNLSII       | C            | 64    | 78  | HLA-DRB3*02:02            | Dengue virus 3 | ELISPOT          | IFNg release | Positive            |
| 868645     | RGLLNGQGPMLLVMA      | C            | 15    | 29  | HLA-DRB3*02:02            | Dengue virus 3 | ELISPOT          | IFNg release | Positive            |
| 868733     | RWGTFKKSGAIKVLR      | C            | 48    | 62  | HLA-DRB3*02:02            | Dengue virus 3 | ELISPOT          | IFNg release | Positive            |
| 195602     | KVVIFILLMLVTPSM      | PreM         | 265   | 279 | HLA-DRB1*01:01            | Dengue virus 3 | ELISPOT          | IFNg release | Positive            |
| 195726     | LTQKVIFILLMLVT       | PreM         | 262   | 276 | HLA-DRB1*11:01            | Dengue virus 3 | ELISPOT          | IFNg release | Positive            |
| 195830     | PGFTILALFLAHYIG      | PreM         | 245   | 259 | HLA-DRB1*15:06            | Dengue virus 3 | ELISPOT          | IFNg release | Positive            |
| 195968     | SLIQKVIFILLMLV       | PreM         | 261   | 275 | HLA-DRB1*15:06            | Dengue virus 3 | ELISPOT          | IFNg release | Positive            |
| 196067     | TQKVIFILLMLVTP       | PreM         | 263   | 277 | HLA-DRB1*15:06            | Dengue virus 3 | ELISPOT          | IFNg release | Positive            |
| 196203     | VVIFILLMLVTPSMT      | PreM         | 266   | 280 | HLA-DRB1*07:01            | Dengue virus 3 | ELISPOT          | IFNg release | Positive            |
| 539529     | KVVIFILLVTPSM        | PreM         | 265   | 279 | HLA-DRB1*15:06            | Dengue virus 3 | ELISPOT          | IFNg release | Positive            |
| 539808     | QKVIFILLMLVTPS       | PreM         | 264   | 278 | HLA-DRB1*15:06            | Dengue virus 3 | ELISPOT          | IFNg release | Positive            |
| 540004     | TSLTQKVIFILLML       | PreM         | 260   | 274 | HLA-DPB1*04:02            | Dengue virus 3 | ELISPOT          | IFNg release | Positive            |
| 867082     | HPGFTILALFLAHYI      | PreM         | 244   | 258 | HLA-DPB1*02:01            | Dengue virus 3 | ELISPOT          | IFNg release | Positive            |
| 869302     | TQKVIFILLMLVTP       | PreM         | 263   | 277 | HLA-DPB1*04:02            | Dengue virus 3 | ELISPOT          | IFNg release | Positive            |
| 119134     | EGKVQYENLKVTYI       | E            | 126   | 140 | HLA-DR2                   | Dengue virus 3 | ELISPOT          | IFNg release | Positive            |
| 119289     | NGRLITANPVVTKEE      | E            | 626   | 640 | HLA-DRB1*08:02            | Dengue virus 3 | ELISPOT          | IFNg release | Positive            |
| 119327     | RKELLVTFKNAHAK       | E            | 231   | 245 | HLA-DR2                   | Dengue virus 3 | ELISPOT          | IFNg release | Positive            |
| 13376      | EMILLTMKNKAWMHV      | E            | 473   | 487 | HLA-DRB1*13:01            | Dengue virus 3 | ELISPOT          | IFNg release | Positive            |
| 195215     | DFNEMILLTMKNKAW      | E            | 470   | 484 | HLA-DRB1*14:04            | Dengue virus 3 | ELISPOT          | IFNg release | Positive            |
| 195252     | ELLVTFKNAHAKQGE      | E            | 513   | 527 | HLA-DRB1*04:01            | Dengue virus 3 | ELISPOT          | IFNg release | Positive            |
| 195341     | FVLKKEVSETQHG        | E            | 584   | 598 | HLA-DRB1*04:01            | Dengue virus 3 | ELISPOT          | IFNg release | Positive            |
| 195365     | GHLKRLKMDKLELK       | E            | 559   | 573 | HLA-DRB1*03:01            | Dengue virus 3 | ELISPOT          | IFNg release | Positive            |
| 195416     | GRILITANPVVTKEE      | E            | 627   | 641 | HLA-DRB1*08:02            | Dengue virus 3 | ELISPOT          | IFNg release | Positive            |
| 195813     | NRKELLVTFKNAHAK      | E            | 510   | 524 | HLA-DRB1*04:01            | Dengue virus 3 | ELISPOT          | IFNg release | Positive            |
| 196033     | TFVLKKEVSETQHG       | E            | 583   | 597 | HLA-DRB1*04:01            | Dengue virus 3 | ELISPOT          | IFNg release | Positive            |
| 196170     | VQHENLKVTYITVH       | E            | 130   | 144 | HLA-DRB1*07:01            | Dengue virus 3 | ELISPOT          | IFNg release | Positive            |
| 196172     | VQYENLKVTYITVH       | E            | 410   | 424 | HLA-DRB1*07:01            | Dengue virus 3 | ELISPOT          | IFNg release | Positive            |
| 539400     | IEGKVQYENLKTYV       | E            | 405   | 419 | HLA-DRB1*15:02            | Dengue virus 3 | ELISPOT          | IFNg release | Positive            |
| 539460     | KELLVTFKNAHAKQ       | E            | 512   | 526 | HLA-DRB1*08:03            | Dengue virus 3 | ELISPOT          | IFNg release | Positive            |
| 539476     | KELLVTFKNAHAK        | E            | 511   | 525 | HLA-DRB1*14:04            | Dengue virus 3 | ELISPOT          | IFNg release | Positive            |
| 539559     | LGMVHVQIFGSAYTA      | E            | 710   | 724 | HLA-DRB1*04:03            | Dengue virus 3 | ELISPOT          | IFNg release | Positive            |
| 539710     | NEMILLTMKNKAWMV      | E            | 472   | 486 | HLA-DRB1*04:03            | Dengue virus 3 | ELISPOT          | IFNg release | Positive            |
| 539856     | RKELLTTFKNAHAK       | E            | 511   | 525 | HLA-DRB1*04:03            | Dengue virus 3 | ELISPOT          | IFNg release | Positive            |
| 591605     | AFVLKKEVSETQHG       | E            | 303   | 317 | HLA-DRB1*04:01            | Dengue virus 3 | ELISPOT          | IFNg release | Positive            |
| 591719     | NEMILLTMKNRAWMV      | E            | 474   | 488 | HLA-DRB1*11:01            | Dengue virus 3 | ELISPOT          | IFNg release | Positive            |
| 739011     | GGVLSLGKVMHQIF       | E            | 704   | 718 | HLA-DRB1*11:04            | Dengue virus 3 | ELISPOT          | IFNg release | Positive            |
| 739041     | GMSYAMCTNTFVLK       | E            | 574   | 588 | HLA-DRB1*04:07            | Dengue virus 3 | ELISPOT          | IFNg release | Positive            |
| 739344     | KMVHVQIFGSAYTALF     | E            | 31    | 45  | HLA-DRB3*02:02            | Dengue virus 3 | ELISPOT          | IFNg release | Positive            |
| 740409     | SVGGVLSLGKVMHQ       | E            | 702   | 716 | HLA-DRB1*11:04            | Dengue virus 3 | ELISPOT          | IFNg release | Positive            |
| 741746     | MRCVGVGNRDFVEGLSGATW | E            | 281   | 300 | HLA class II              | Dengue virus 3 | ELISPOT          | IFNg release | Positive            |
| 866574     | EIQNSGGTSIFAGHL      | E            | 547   | 561 | HLA-DQA1*01:02/DQB1*06:02 | Dengue virus 3 | ELISPOT          | IFNg release | Positive            |
| 867374     | KAWIVHRQWFFDLPL      | E            | 482   | 496 | HLA-DQA1*01:01/DQB1*05:01 | Dengue virus 3 | ELISPOT          | IFNg release | Positive            |
| 867377     | KCRLKMDKLELKGMS      | E            | 562   | 576 | HLA-DRB3*02:02            | Dengue virus 3 | ELISPOT          | IFNg release | Positive            |
| 868175     | MVHRQWFFDLPLPW       | E            | 485   | 499 | HLA-DQA1*01:01/DQB1*05:01 | Dengue virus 3 | ELISPOT          | IFNg release | Positive            |
| 869693     | WMVHRQWFFDLPLPW      | E            | 87    | 101 | HLA-DQA1*01:01/DQB1*05:01 | Dengue virus 3 | ELISPOT          | IFNg release | Positive            |



|         |                     |      |      |      |                           |                |         |              |          |
|---------|---------------------|------|------|------|---------------------------|----------------|---------|--------------|----------|
| 190705  | AKIVTAETQNSSFII     | NS1  | 894  | 908  | HLA-DRB1*04:01            | Dengue virus 3 | ELISPOT | IFNg release | Positive |
| 190823  | KLTVVVGDIIGVLEQ     | NS1  | 85   | 99   | HLA-DR2                   | Dengue virus 3 | ELISPOT | IFNg release | Positive |
| 190825  | KQIANELNYILWENN     | NS1  | 69   | 83   | HLA-DR2                   | Dengue virus 3 | ELISPOT | IFNg release | Positive |
| 190996  | TEQYKQADSPKRLA      | NS1  | 802  | 816  | HLA-DRB5*01:01            | Dengue virus 3 | ELISPOT | IFNg release | Positive |
| 195164  | ANELNYILWENNIKL     | NS1  | 845  | 859  | HLA-DRB1*03:01            | Dengue virus 3 | ELISPOT | IFNg release | Positive |
| 195419  | GSWKLEKASLIEVK      | NS1  | 981  | 995  | HLA-DRB1*01:01            | Dengue virus 3 | ELISPOT | IFNg release | Positive |
| 195577  | KLTVVVGDTIGVLEQ     | NS1  | 858  | 872  | HLA-DRB1*03:01            | Dengue virus 3 | ELISPOT | IFNg release | Positive |
| 195692  | LNLYLWENNIKLTVV     | NS1  | 848  | 862  | HLA-DRB1*03:01            | Dengue virus 3 | ELISPOT | IFNg release | Positive |
| 195782  | NELNYILWENNIKLT     | NS1  | 846  | 860  | HLA-DRB1*03:01            | Dengue virus 3 | ELISPOT | IFNg release | Positive |
| 196235  | YKFQADSPKRLATAI     | NS1  | 805  | 819  | HLA-DRB1*03:01            | Dengue virus 3 | ELISPOT | IFNg release | Positive |
| 539070  | AKIVTAETRNSSFII     | NS1  | 121  | 135  | HLA-DRB1*13:01            | Dengue virus 3 | ELISPOT | IFNg release | Positive |
| 539457  | KAKIVIAETQNSSFI     | NS1  | 893  | 907  | HLA-DRB1*13:01            | Dengue virus 3 | ELISPOT | IFNg release | Positive |
| 539717  | NGSWKLEKASLIEVK     | NS1  | 980  | 994  | HLA-DRB1*09:01            | Dengue virus 3 | ELISPOT | IFNg release | Positive |
| 539825  | QYKQADSPKRLATA      | NS1  | 804  | 818  | HLA-DRB3*02:02            | Dengue virus 3 | ELISPOT | IFNg release | Positive |
| 866698  | FGVFTTNILWLKRDV     | NS1  | 933  | 947  | HLA-DPB1*04:01            | Dengue virus 3 | ELISPOT | IFNg release | Positive |
| 866700  | FGVFTTNILWLKREV     | NS1  | 933  | 947  | HLA-DPB1*01:01            | Dengue virus 3 | ELISPOT | IFNg release | Positive |
| 867042  | HADMGYWIESQKNGS     | NS1  | 968  | 982  | HLA-DQA1*01:01/DQB1*05:01 | Dengue virus 3 | ELISPOT | IFNg release | Positive |
| 167810  | RENLLGVGLAMATTLQLPE | NS2a | 1224 | 1243 | HLA-DP                    | Dengue virus 3 | ELISPOT | IFNg release | Positive |
| 195123  | AGVFFTVLLLSGQI      | NS2a | 1159 | 1173 | HLA-DRB1*07:01            | Dengue virus 3 | ELISPOT | IFNg release | Positive |
| 195125  | AGVIFTFVLLLSGQI     | NS2a | 1159 | 1173 | HLA-DRB1*07:01            | Dengue virus 3 | ELISPOT | IFNg release | Positive |
| 195128  | AGVLFMFVLLLSGQI     | NS2a | 1159 | 1173 | HLA-DRB1*07:01            | Dengue virus 3 | ELISPOT | IFNg release | Positive |
| 195133  | AHTFIMIGSNASDRM     | NS2a | 1179 | 1193 | HLA-DRB1*04:01            | Dengue virus 3 | ELISPOT | IFNg release | Positive |
| 195134  | AHTLIMIGSNASDRM     | NS2a | 1179 | 1193 | HLA-DRB1*04:01            | Dengue virus 3 | ELISPOT | IFNg release | Positive |
| 195166  | ANTFIMIGSNASDRM     | NS2a | 1179 | 1193 | HLA-DRB1*04:01            | Dengue virus 3 | ELISPOT | IFNg release | Positive |
| 195197  | AWRTATLILAGVSL      | NS2a | 1289 | 1303 | HLA-DRB1*01:01            | Dengue virus 3 | ELISPOT | IFNg release | Positive |
| 195222  | DMAHTLIMIGSNASD     | NS2a | 1177 | 1191 | HLA-DRB1*04:01            | Dengue virus 3 | ELISPOT | IFNg release | Positive |
| 195335  | FTFVLLLSGQITWRD     | NS2a | 1163 | 1177 | HLA-DRB1*15:02            | Dengue virus 3 | ELISPOT | IFNg release | Positive |
| 195337  | FTLTVAWRTATLILA     | NS2a | 1284 | 1298 | HLA-DRB1*07:01            | Dengue virus 3 | ELISPOT | IFNg release | Positive |
| 195342  | FVLLLSGQITWRDMA     | NS2a | 1165 | 1179 | HLA-DRB1*01:01            | Dengue virus 3 | ELISPOT | IFNg release | Positive |
| 195429  | GVFFTFVLLLSGQIT     | NS2a | 1160 | 1174 | HLA-DRB1*04:01            | Dengue virus 3 | ELISPOT | IFNg release | Positive |
| 195433  | GVLFTFVLLLSGQIT     | NS2a | 1160 | 1174 | HLA-DRB1*15:06            | Dengue virus 3 | ELISPOT | IFNg release | Positive |
| 195456  | HMIAGILFMFVLLLS     | NS2a | 1156 | 1170 | HLA-DRB1*11:01            | Dengue virus 3 | ELISPOT | IFNg release | Positive |
| 195457  | HMIAGVFFTFVLLLS     | NS2a | 1156 | 1170 | HLA-DRB1*11:01            | Dengue virus 3 | ELISPOT | IFNg release | Positive |
| 195462  | HTLIMIGSNASDRMG     | NS2a | 1180 | 1194 | HLA-DRB1*04:01            | Dengue virus 3 | ELISPOT | IFNg release | Positive |
| 195481  | IFTLTVAWRTATLIL     | NS2a | 1283 | 1297 | HLA-DRB1*07:01            | Dengue virus 3 | ELISPOT | IFNg release | Positive |
| 195609  | LALGFFLRKLTSREN     | NS2a | 1212 | 1226 | HLA-DRB1*11:01            | Dengue virus 3 | ELISPOT | IFNg release | Positive |
| 195630  | LFTFVLLLSGQITWR     | NS2a | 1162 | 1176 | HLA-DRB1*07:01            | Dengue virus 3 | ELISPOT | IFNg release | Positive |
| 195632  | LGFFLRKLTSRENLL     | NS2a | 1214 | 1228 | HLA-DRB1*11:01            | Dengue virus 3 | ELISPOT | IFNg release | Positive |
| 195644  | LIMIGSNASDRMGMG     | NS2a | 1182 | 1196 | HLA-DRB1*04:01            | Dengue virus 3 | ELISPOT | IFNg release | Positive |
| 195645  | LISLTCSTNIFTTLTV    | NS2a | 1274 | 1288 | HLA-DRB1*07:01            | Dengue virus 3 | ELISPOT | IFNg release | Positive |
| 195729  | LTVAWRTATLILAGV     | NS2a | 1286 | 1300 | HLA-DPB1*04:02            | Dengue virus 3 | ELISPOT | IFNg release | Positive |
| 195734  | LVSLTCSNTILTLTV     | NS2a | 1274 | 1288 | HLA-DRB1*07:01            | Dengue virus 3 | ELISPOT | IFNg release | Positive |
| 195740  | LWTALVSLTCSNTIF     | NS2a | 1270 | 1284 | HLA-DRB1*07:01            | Dengue virus 3 | ELISPOT | IFNg release | Positive |
| 195743  | MAHTLIMIGSNASDR     | NS2a | 1178 | 1192 | HLA-DRB1*04:01            | Dengue virus 3 | ELISPOT | IFNg release | Positive |
| 195757  | MGVTYLALIAFKIQ      | NS2a | 1195 | 1209 | HLA-DRB1*07:01            | Dengue virus 3 | ELISPOT | IFNg release | Positive |
| 195819  | NTIFTLTVAWRTATL     | NS2a | 1281 | 1295 | HLA-DRB1*07:01            | Dengue virus 3 | ELISPOT | IFNg release | Positive |
| 195836  | PLFIFSLKDTLKRRS     | NS2a | 1330 | 1344 | HLA-DRB1*11:01            | Dengue virus 3 | ELISPOT | IFNg release | Positive |
| 195912  | RTATLILAGVSLLPV     | NS2a | 1291 | 1305 | HLA-DRB1*03:01            | Dengue virus 3 | ELISPOT | IFNg release | Positive |
| 196123  | VGVLFTFVLLLSGQI     | NS2a | 1159 | 1173 | HLA-DRB1*07:01            | Dengue virus 3 | ELISPOT | IFNg release | Positive |
| 539075  | ALGFFLRKLTSRENLL    | NS2a | 1213 | 1227 | HLA-DRB1*12:02            | Dengue virus 3 | ELISPOT | IFNg release | Positive |
| 539370  | GVTYLALIAFKIQP      | NS2a | 1196 | 1210 | HLA-DRB1*10:01            | Dengue virus 3 | ELISPOT | IFNg release | Positive |
| 539429  | IQPFLALGFFLRLKL     | NS2a | 1208 | 1222 | HLA-DRB1*15:06            | Dengue virus 3 | ELISPOT | IFNg release | Positive |
| 539568  | LIAFKIQPFLALGF      | NS2a | 1202 | 1216 | HLA-DRB1*15:06            | Dengue virus 3 | ELISPOT | IFNg release | Positive |
| 539802  | QFETYQLWTALVSLT     | NS2a | 1264 | 1278 | HLA-DRB1*15:02            | Dengue virus 3 | ELISPOT | IFNg release | Positive |
| 540048  | VLFTFVLLLSGQITW     | NS2a | 1161 | 1175 | HLA-DRB1*09:01            | Dengue virus 3 | ELISPOT | IFNg release | Positive |
| 540093  | VTYLALIAFKIQPF      | NS2a | 1197 | 1211 | HLA-DRB1*04:03            | Dengue virus 3 | ELISPOT | IFNg release | Positive |
| 865959  | AGALFTFVLLLSGQI     | NS2a | 1159 | 1173 | HLA-DPB1*04:02            | Dengue virus 3 | ELISPOT | IFNg release | Positive |
| 867116  | IAGVFFTFVLLLSGQ     | NS2a | 1158 | 1172 | HLA-DPB1*01:01            | Dengue virus 3 | ELISPOT | IFNg release | Positive |
| 867442  | KLITQFETYQLWTAL     | NS2a | 1260 | 1274 | HLA-DPB1*02:01            | Dengue virus 3 | ELISPOT | IFNg release | Positive |
| 867551  | LALIAFKIQPFLAL      | NS2a | 1200 | 1214 | HLA-DPB1*04:01            | Dengue virus 3 | ELISPOT | IFNg release | Positive |
| 867702  | LIAFKIQPFLTLGF      | NS2a | 1202 | 1216 | HLA-DPB1*01:01            | Dengue virus 3 | ELISPOT | IFNg release | Positive |
| 868046  | MALKLITQFETYQLW     | NS2a | 1257 | 1271 | HLA-DPB1*01:01            | Dengue virus 3 | ELISPOT | IFNg release | Positive |
| 868109  | MIAGVIFTFVLLLSG     | NS2a | 1157 | 1171 | HLA-DPB1*04:02            | Dengue virus 3 | ELISPOT | IFNg release | Positive |
| 868303  | PFLALGFFLRLKLSR     | NS2a | 1210 | 1224 | HLA-DPB1*01:01            | Dengue virus 3 | ELISPOT | IFNg release | Positive |
| 868329  | PLPLFIFSLKDTLKR     | NS2a | 1328 | 1342 | HLA-DPB1*01:01            | Dengue virus 3 | ELISPOT | IFNg release | Positive |
| 868551  | QPFLALGFFLRLKLS     | NS2a | 1209 | 1223 | HLA-DPB1*02:01            | Dengue virus 3 | ELISPOT | IFNg release | Positive |
| 869256  | TLTVAWRTATLILAG     | NS2a | 1285 | 1299 | HLA-DPB1*04:02            | Dengue virus 3 | ELISPOT | IFNg release | Positive |
| 869298  | TQFETYQLWTALISL     | NS2a | 1263 | 1277 | HLA-DPB1*04:02            | Dengue virus 3 | ELISPOT | IFNg release | Positive |
| 869592  | VQPFALGFFLRLKL      | NS2a | 1208 | 1222 | HLA-DPB1*01:01            | Dengue virus 3 | ELISPOT | IFNg release | Positive |
| 167823  | TMRIKDDTENILTLLKTA  | NS2b | 83   | 102  | HLA-DRB1*15:01            | Dengue virus 3 | ELISPOT | IFNg release | Positive |
| 195180  | ASSLLRNDVPMAGPL     | NS2b | 1361 | 1375 | HLA-DRB1*03:01            | Dengue virus 3 | ELISPOT | IFNg release | Positive |
| 195403  | GLVSILASSLLRNDV     | NS2b | 1355 | 1369 | HLA-DRB1*01:01            | Dengue virus 3 | ELISPOT | IFNg release | Positive |
| 195789  | NILTVLLKTALLIVS     | NS2b | 1436 | 1450 | HLA-DRB1*01:01            | Dengue virus 3 | ELISPOT | IFNg release | Positive |
| 195994  | SSLLRNDVPMAGPL      | NS2b | 1362 | 1376 | HLA-DRB1*03:01            | Dengue virus 3 | ELISPOT | IFNg release | Positive |
| 196152  | VMAVGLVSILASSLL     | NS2b | 1351 | 1365 | HLA-DRB1*07:01            | Dengue virus 3 | ELISPOT | IFNg release | Positive |
| 539100  | AVGLVSILASSLLRN     | NS2b | 1353 | 1367 | HLA-DRB1*10:01            | Dengue virus 3 | ELISPOT | IFNg release | Positive |
| 540087  | VSGIFPYSIPATLLV     | NS2b | 1449 | 1463 | HLA-DRB1*09:01            | Dengue virus 3 | ELISPOT | IFNg release | Positive |
| 739173  | IGLVSILASSLLRND     | NS2b | 1354 | 1368 | HLA-DRB1*11:04            | Dengue virus 3 | ELISPOT | IFNg release | Positive |
| 1067120 | GKVVGLYGNVGVTKN     | NS3  | 1617 | 1631 | HLA-DRB1*15:01            | Dengue virus 3 | ELISPOT | IFNg release | Positive |
| 150544  | RRLRTLILAPTRVVA     | NS3  | 1688 | 1702 | HLA-DRB1*01:01            | Dengue virus 3 | ELISPOT | IFNg release | Positive |
| 150617  | TFTMRLLSPVRPNY      | NS3  | 1738 | 1752 | HLA-DRB1*01:01            | Dengue virus 3 | ELISPOT | IFNg release | Positive |
| 190307  | REIWDLMCHATF        | NS3  | 255  | 266  | HLA-DPA1*01:03/DPB1*02:01 | Dengue virus 3 | ELISA   | IL-2 release | Positive |
| 190710  | ANCLRRNGKKVQLS      | NS3  | 1846 | 1860 | HLA-DRB1*13:01            | Dengue virus 3 | ELISPOT | IFNg release | Positive |
| 190732  | EAAAFMTATPPGTA      | NS3  | 1782 | 1796 | HLA-DRB1*04:03            | Dengue virus 3 | ELISPOT | IFNg release | Positive |
| 190774  | GKTVVWFVPSIKAGND    | NS3  | 357  | 371  | HLA-DR2                   | Dengue virus 3 | ELISPOT | IFNg release | Positive |
| 195144  | AIVREAIKRLRLTLI     | NS3  | 1680 | 1694 | HLA-DRB1*08:02            | Dengue virus 3 | ELISPOT | IFNg release | Positive |
| 195243  | EGKVVGLYGNGVVTK     | NS3  | 5    | 19   | HLA-DRB1*15:01            | Dengue virus 3 | ELISPOT | IFNg release | Positive |
| 195297  | FHTMWHVTRGAULTY     | NS3  | 1519 | 1533 | HLA-DRB1*07:01            | Dengue virus 3 | ELISPOT | IFNg release | Positive |
| 195430  | GVFHTMWHVTRGAUL     | NS3  | 1517 | 1531 | HLA-DRB1*07:01            | Dengue virus 3 | ELISPOT | IFNg release | Positive |
| 195898  | RLRTLILAPTRVAA      | NS3  | 1689 | 1703 | HLA-DRB1*04:03            | Dengue virus 3 | ELISPOT | IFNg release | Positive |
| 21420   | GNEWITDFVGKTVWF     | NS3  | 31   | 45   | HLA-DRB1*15:01            | Dengue virus 3 | ICS     | IFNg release | Positive |



|        |                      |      |      |      |                           |                |                   |                     |          |
|--------|----------------------|------|------|------|---------------------------|----------------|-------------------|---------------------|----------|
| 28422  | IRYQTATK             | NS3  | 241  | 249  | HLA-DR15                  | Dengue virus 3 | 51 chromium       | cytotoxicity        | Positive |
| 30395  | KEGEKKLRPRWLDA       | NS3  | 585  | 599  | HLA class II              | Dengue virus 3 | ICS               | IFNg release        | Positive |
| 38401  | LPAlVREAIKRRRL       | NS3  | 1678 | 1692 | HLA-DRB3*02:02            | Dengue virus 3 | ELISPOT           | IFNg release        | Positive |
| 39     | AAAlFMTATPPGTAD      | NS3  | 1783 | 1797 | HLA-DRB1*04:03            | Dengue virus 3 | ELISPOT           | IFNg release        | Positive |
| 45670  | NREGKVVLGYNGVV       | NS3  | 141  | 155  | HLA-DRB1*15:01            | Dengue virus 3 | multimer/tetramer | qualitative binding | Positive |
| 49767  | PTRVAAEMEEAMKG       | NS3  | 1697 | 1711 | HLA-DRB1*15:01            | Dengue virus 3 | ICS               | IFNg release        | Positive |
| 539028 | AAIFMTATPPGTADA      | NS3  | 1784 | 1798 | HLA-DRB1*10:01            | Dengue virus 3 | ELISPOT           | IFNg release        | Positive |
| 539052 | AGKTVWFVPSIKAGN      | NS3  | 1829 | 1843 | HLA-DRB1*08:03            | Dengue virus 3 | ELISPOT           | IFNg release        | Positive |
| 539432 | IREAIKRRRLTLILA      | NS3  | 1682 | 1696 | HLA-DRB1*08:03            | Dengue virus 3 | ELISPOT           | IFNg release        | Positive |
| 539578 | LKGLPIRYQTATKS       | NS3  | 1709 | 1723 | HLA-DRB1*13:01            | Dengue virus 3 | ELISPOT           | IFNg release        | Positive |
| 539607 | LPiRYQTATKSEHT       | NS3  | 1712 | 1726 | HLA-DRB1*13:01            | Dengue virus 3 | ELISPOT           | IFNg release        | Positive |
| 539714 | NGKKVIQLSRKTFDT      | NS3  | 1852 | 1866 | HLA-DRB1*12:02            | Dengue virus 3 | ELISPOT           | IFNg release        | Positive |
| 539777 | PKNFQTMPIGIFTT       | NS3  | 1579 | 1593 | HLA-DRB1*04:03            | Dengue virus 3 | ELISPOT           | IFNg release        | Positive |
| 539838 | REAIKRRRLTLILA       | NS3  | 1683 | 1697 | HLA-DRB1*14:04            | Dengue virus 3 | ELISPOT           | IFNg release        | Positive |
| 539844 | REGKVVLGYNGVVV       | NS3  | 1615 | 1629 | HLA-DRB1*01:02            | Dengue virus 3 | ELISPOT           | IFNg release        | Positive |
| 539991 | TMRLSPVRVPNNYL       | NS3  | 1740 | 1754 | HLA-DRB1*13:01            | Dengue virus 3 | ELISPOT           | IFNg release        | Positive |
| 540037 | VGKTVWFVPSIKAGN      | NS3  | 1829 | 1843 | HLA-DRB1*08:03            | Dengue virus 3 | ELISPOT           | IFNg release        | Positive |
| 540039 | VGLYNGVSVTKNGGY      | NS3  | 9    | 23   | HLA-DRB1*15:06            | Dengue virus 3 | ELISPOT           | IFNg release        | Positive |
| 54455  | RKYLPAIVRE           | NS3  | 202  | 211  | HLA-DR15                  | Dengue virus 3 | 51 chromium       | cytotoxicity        | Positive |
| 55024  | RNLTIMDLHPGSGKT      | NS3  | 187  | 201  | HLA class II              | Dengue virus 3 | ICS               | IFNg release        | Positive |
| 66127  | TRVAAEMEEA           | NS3  | 225  | 235  | HLA-DR15                  | Dengue virus 3 | 51 chromium       | cytotoxicity        | Positive |
| 68015  | VDLMCHATFT           | NS3  | 258  | 267  | HLA-DPw2                  | Dengue virus 3 | 51 chromium       | cytotoxicity        | Positive |
| 70708  | VREAIKRRRLTLILA      | NS3  | 1682 | 1696 | HLA-DRB1*12:02            | Dengue virus 3 | ELISPOT           | IFNg release        | Positive |
| 72654  | WITDFVGKTVW          | NS3  | 1824 | 1834 | HLA-DR15                  | Dengue virus 3 | 51 chromium       | cytotoxicity        | Positive |
| 866771 | FQITTGEIGAALDF       | NS3  | 1589 | 1603 | HLA-DQA1*03:01/DQB1*03:02 | Dengue virus 3 | ELISPOT           | IFNg release        | Positive |
| 867106 | HTMWHVTRGAVLTYN      | NS3  | 1520 | 1534 | HLA-DQA1*05:01/DQB1*02:01 | Dengue virus 3 | ELISPOT           | IFNg release        | Positive |
| 867358 | IVREAIKRRRLTLIL      | NS3  | 1681 | 1695 | HLA-DRB3*02:02            | Dengue virus 3 | ELISPOT           | IFNg release        | Positive |
| 867534 | KYLPAlVREAIKRRRL     | NS3  | 1676 | 1690 | HLA-DRB4*01:01            | Dengue virus 3 | ELISPOT           | IFNg release        | Positive |
| 867875 | LNDWDFVTTDISEM       | NS3  | 1873 | 1887 | HLA-DQA1*03:01/DQB1*03:02 | Dengue virus 3 | ELISPOT           | IFNg release        | Positive |
| 869278 | TMWHVTRGAVLTHNG      | NS3  | 1521 | 1535 | HLA-DQA1*05:01/DQB1*02:01 | Dengue virus 3 | ELISPOT           | IFNg release        | Positive |
| 869689 | WHVTRGAVLTYNGKR      | NS3  | 1523 | 1537 | HLA-DQA1*05:01/DQB1*02:01 | Dengue virus 3 | ELISPOT           | IFNg release        | Positive |
| 167755 | IAlDLVTEIGRPVSHLAHRT | NS4a | 2    | 21   | HLA class II              | Dengue virus 3 | ELISPOT           | IFNg release        | Positive |
| 195199 | AYVVIGILTLAAIVA      | NS4a | 2227 | 2241 | HLA-DRB1*01:01            | Dengue virus 3 | ELISPOT           | IFNg release        | Positive |
| 195522 | IPLQWIASAIVLEFF      | NS4a | 2192 | 2206 | HLA-DRB1*01:01            | Dengue virus 3 | ELISPOT           | IFNg release        | Positive |
| 195742 | MADVPQLQWIASAIVL     | NS4a | 2189 | 2203 | HLA-DRB1*07:01            | Dengue virus 3 | ELISPOT           | IFNg release        | Positive |
| 195828 | PETMETLLLLGLML       | NS4a | 2141 | 2155 | HLA-DRB1*15:06            | Dengue virus 3 | ELISPOT           | IFNg release        | Positive |
| 196056 | TLLLLGLMILLTGGA      | NS4a | 2146 | 2160 | HLA-DRB1*15:06            | Dengue virus 3 | ELISPOT           | IFNg release        | Positive |
| 196168 | VPLQWIASAIVLEFF      | NS4a | 2192 | 2206 | HLA-DRB1*01:01            | Dengue virus 3 | ELISPOT           | IFNg release        | Positive |
| 539900 | SGMLWMADVPLQWIA      | NS4a | 2184 | 2198 | HLA-DRB1*04:03            | Dengue virus 3 | ELISPOT           | IFNg release        | Positive |
| 739020 | GIGKTSJGLICIVS       | NS4a | 2169 | 2183 | HLA-DRB1*11:04            | Dengue virus 3 | ELISPOT           | IFNg release        | Positive |
| 739464 | LFLISGKGIGKTSIG      | NS4a | 2162 | 2176 | HLA-DRB1*01:02            | Dengue virus 3 | ELISPOT           | IFNg release        | Positive |
| 869474 | VIGILTAAIIAANE       | NS4a | 2230 | 2244 | HLA-DQA1*01:02/DQB1*06:02 | Dengue virus 3 | ELISPOT           | IFNg release        | Positive |
| 195346 | GAGLAFSIMGVSVGTG     | NS4b | 2474 | 2488 | HLA-DRB1*04:01            | Dengue virus 3 | ELISPOT           | IFNg release        | Positive |
| 195607 | LAFSIMKSVGTGKRG      | NS4b | 2477 | 2491 | HLA-DRB1*04:01            | Dengue virus 3 | ELISPOT           | IFNg release        | Positive |
| 195617 | LCAVQLLLMRTSWAL      | NS4b | 2418 | 2432 | HLA-DRB1*15:01            | Dengue virus 3 | ELISPOT           | IFNg release        | Positive |
| 195624 | LDPIVYDSKFEKQLG      | NS4b | 2397 | 2411 | HLA-DRB1*03:01            | Dengue virus 3 | ELISPOT           | IFNg release        | Positive |
| 195663 | LLLITHYAIIGPGLQ      | NS4b | 2354 | 2368 | HLA-DRB1*07:01            | Dengue virus 3 | ELISPOT           | IFNg release        | Positive |
| 195664 | LLLMTSWSALCEALT      | NS4b | 2423 | 2437 | HLA-DRB1*04:01            | Dengue virus 3 | ELISPOT           | IFNg release        | Positive |
| 195807 | NPLTLTAAILLLITH      | NS4b | 2345 | 2359 | HLA-DRB1*07:01            | Dengue virus 3 | ELISPOT           | IFNg release        | Positive |
| 195871 | QVMMLLVLCVQLLLM      | NS4b | 2412 | 2426 | HLA-DRB1*01:01            | Dengue virus 3 | ELISPOT           | IFNg release        | Positive |
| 196023 | TAAVLLLITHYAIIG      | NS4b | 2350 | 2364 | HLA-DRB1*15:01            | Dengue virus 3 | ELISPOT           | IFNg release        | Positive |
| 196137 | VLCAVQLLLMRTSWA      | NS4b | 2417 | 2431 | HLA-DRB1*12:02            | Dengue virus 3 | ELISPOT           | IFNg release        | Positive |
| 196155 | VMLLVLCVQLLLMR       | NS4b | 2413 | 2427 | HLA-DRB1*03:01            | Dengue virus 3 | ELISPOT           | IFNg release        | Positive |
| 196163 | VNPLTLTAAVLLLIT      | NS4b | 2344 | 2358 | HLA-DRB1*01:01            | Dengue virus 3 | ELISPOT           | IFNg release        | Positive |
| 738453 | AGLAFSIMGVSVGTGK     | NS4b | 2475 | 2489 | HLA-DRB1*04:07            | Dengue virus 3 | ELISPOT           | IFNg release        | Positive |
| 867986 | LTLTAAVLLLATHYA      | NS4b | 2347 | 2361 | HLA-DQA1*01:02/DQB1*06:02 | Dengue virus 3 | ELISPOT           | IFNg release        | Positive |
| 868878 | SLAAIANQAVVLMGL      | NS4b | 2306 | 2320 | HLA-DQA1*01:02/DQB1*06:02 | Dengue virus 3 | ELISPOT           | IFNg release        | Positive |
| 869526 | VLLLVTHYAIIGPGL      | NS4b | 2353 | 2367 | HLA-DPB1*02:01            | Dengue virus 3 | ELISPOT           | IFNg release        | Positive |
| 167753 | HVNAEPETPNMDVIGERIKR | NS5  | 263  | 282  | HLA class II              | Dengue virus 3 | ELISPOT           | IFNg release        | Positive |
| 167769 | KKLNQLSRKEFDL        | NS5  | 15   | 27   | HLA-DP                    | Dengue virus 3 | ELISPOT           | IFNg release        | Positive |
| 195136 | AlFKLTYQNKVVVKVQ     | NS5  | 3056 | 3070 | HLA-DRB1*09:01            | Dengue virus 3 | ELISPOT           | IFNg release        | Positive |
| 195204 | CLGKAYAQMWSLMYF      | NS5  | 3243 | 3257 | HLA-DRB1*04:01            | Dengue virus 3 | ELISPOT           | IFNg release        | Positive |
| 195273 | ETKGVRLKRMAISG       | NS5  | 3138 | 3152 | HLA-DRB1*11:01            | Dengue virus 3 | ELISPOT           | IFNg release        | Positive |
| 195382 | GKVRKDIPOWQPSKG      | NS5  | 3175 | 3189 | HLA-DRB1*03:01            | Dengue virus 3 | ELISPOT           | IFNg release        | Positive |
| 195408 | GNIVASVNMVSRLL       | NS5  | 3    | 17   | HLA-DRB1*03:01            | Dengue virus 3 | ELISPOT           | IFNg release        | Positive |
| 195410 | GNIVSSVNMVSRLLL      | NS5  | 2715 | 2729 | HLA-DRB1*03:01            | Dengue virus 3 | ELISPOT           | IFNg release        | Positive |
| 195437 | GYLRDISKIPGGAM       | NS5  | 43   | 57   | HLA-DRB1*08:02            | Dengue virus 3 | ELISPOT           | IFNg release        | Positive |
| 195568 | KHGGMLVRNPLSRNS      | NS5  | 2689 | 2703 | HLA-DRB1*08:02            | Dengue virus 3 | ELISPOT           | IFNg release        | Positive |
| 195641 | LHKLGYLRLDISKIP      | NS5  | 39   | 53   | HLA-DRB1*03:01            | Dengue virus 3 | ELISPOT           | IFNg release        | Positive |
| 195668 | LLNRFMTTHRRPTIE      | NS5  | 16   | 30   | HLA-DRB1*11:01            | Dengue virus 3 | ELISPOT           | IFNg release        | Positive |
| 195779 | NDMGKVRKDKPQWQP      | NS5  | 3172 | 3186 | HLA-DRB1*03:01            | Dengue virus 3 | ELISPOT           | IFNg release        | Positive |
| 195780 | NEDHWFSDNSYSYGV      | NS5  | 2982 | 2996 | HLA-DRB1*04:01            | Dengue virus 3 | ELISPOT           | IFNg release        | Positive |
| 195806 | NMVSRLLLNRFMTTH      | NS5  | 2722 | 2736 | HLA-DRB1*08:02            | Dengue virus 3 | ELISPOT           | IFNg release        | Positive |
| 195812 | NRFMTTHRRPTIEKD      | NS5  | 18   | 32   | HLA-DRB1*11:01            | Dengue virus 3 | ELISPOT           | IFNg release        | Positive |
| 195875 | RAIWYMWLGAARYLF      | NS5  | 2961 | 2975 | HLA-DRB1*01:01            | Dengue virus 3 | ELISPOT           | IFNg release        | Positive |
| 195939 | SCVYNMMGKREKILG      | NS5  | 2938 | 2952 | HLA-DRB1*11:01            | Dengue virus 3 | ELISPOT           | IFNg release        | Positive |
| 196038 | TGNIVASVNMVSRLL      | NS5  | 2    | 16   | HLA-DRB1*04:01            | Dengue virus 3 | ELISPOT           | IFNg release        | Positive |
| 196041 | TGNIVSSVNMVSRLL      | NS5  | 2714 | 2728 | HLA-DRB1*04:01            | Dengue virus 3 | ELISPOT           | IFNg release        | Positive |
| 196162 | VNMVSRLLLNRFMTMT     | NS5  | 9    | 23   | HLA-DRB1*11:01            | Dengue virus 3 | ELISPOT           | IFNg release        | Positive |
| 196221 | WLWRTLGRNKPRLC       | NS5  | 157  | 171  | HLA-DRB1*14:02            | Dengue virus 3 | ELISPOT           | IFNg release        | Positive |
| 196222 | WNIVKLMSGKDVFLY      | NS5  | 2611 | 2625 | HLA-DRB1*15:01            | Dengue virus 3 | ELISPOT           | IFNg release        | Positive |
| 196224 | WSLMYFHRRDLRLAS      | NS5  | 3252 | 3266 | HLA-DRB1*03:01            | Dengue virus 3 | ELISPOT           | IFNg release        | Positive |
| 196239 | YQNKVVKVQRPYTKG      | NS5  | 3062 | 3076 | HLA-DRB1*08:02            | Dengue virus 3 | ELISPOT           | IFNg release        | Positive |
| 231420 | RYLEFEALGFLNEDH      | NS5  | 2971 | 2985 | HLA-DPB1*04:01            | Dengue virus 3 | ELISPOT           | IFNg release        | Positive |
| 32944  | KPWDVVPTV            | NS5  | 2819 | 2827 | HLA class II              | Dengue virus 3 | ELISA             | IL-2 release        | Positive |
| 539444 | IVASVNMVSRLLLN       | NS5  | 2717 | 2731 | HLA-DRB1*12:02            | Dengue virus 3 | ELISPOT           | IFNg release        | Positive |
| 539449 | IVSSVNMVSRLLLN       | NS5  | 2717 | 2731 | HLA-DRB1*11:04            | Dengue virus 3 | ELISPOT           | IFNg release        | Positive |
| 539458 | KCGSCVYNMMGKREK      | NS5  | 2935 | 2949 | HLA-DRB1*13:01            | Dengue virus 3 | ELISPOT           | IFNg release        | Positive |
| 539600 | LMYFHRDLRLASNA       | NS5  | 3254 | 3268 | HLA-DRB1*13:01            | Dengue virus 3 | ELISPOT           | IFNg release        | Positive |
| 539604 | LNTFTNMEEAQLVRQM     | NS5  | 3098 | 3112 | HLA-DRB1*10:01            | Dengue virus 3 | ELISPOT           | IFNg release        | Positive |
| 539704 | NAIFKLTLYQNKVVVKV    | NS5  | 3055 | 3069 | HLA-DRB1*09:01            | Dengue virus 3 | ELISPOT           | IFNg release        | Positive |



|        |                   |     |      |      |                           |                |         |              |          |
|--------|-------------------|-----|------|------|---------------------------|----------------|---------|--------------|----------|
| 539726 | NIVASVNMVSRLLLN   | NS5 | 2716 | 2730 | HLA-DRB1*15:06            | Dengue virus 3 | ELISPOT | IFNg release | Positive |
| 539739 | NMEVQLVRQMEGEV    | NS5 | 3103 | 3117 | HLA-DRB1*13:01            | Dengue virus 3 | ELISPOT | IFNg release | Positive |
| 539831 | RATWAQNIPTAIQQV   | NS5 | 3346 | 3360 | HLA-DRB1*09:01            | Dengue virus 3 | ELISPOT | IFNg release | Positive |
| 539872 | RRDLRLASNAICSAV   | NS5 | 3259 | 3273 | HLA-DRB1*04:03            | Dengue virus 3 | ELISPOT | IFNg release | Positive |
| 539916 | SLMYFHRRDLRLASN   | NS5 | 3253 | 3267 | HLA-DRB1*13:01            | Dengue virus 3 | ELISPOT | IFNg release | Positive |
| 539945 | SVNMVSRLLLNRF     | NS5 | 2720 | 2734 | HLA-DRB1*12:02            | Dengue virus 3 | ELISPOT | IFNg release | Positive |
| 540019 | TYGLNTFTNMEAQLV   | NS5 | 3095 | 3109 | HLA-DRB1*04:03            | Dengue virus 3 | ELISPOT | IFNg release | Positive |
| 540025 | VASVNMVSRLLLNRF   | NS5 | 2718 | 2732 | HLA-DRB1*14:04            | Dengue virus 3 | ELISPOT | IFNg release | Positive |
| 540090 | VSSVNMVSRLLLNRF   | NS5 | 2718 | 2732 | HLA-DRB1*14:04            | Dengue virus 3 | ELISPOT | IFNg release | Positive |
| 540152 | YKTWAYHGSYEVKAT   | NS5 | 2789 | 2803 | HLA-DRB1*09:01            | Dengue virus 3 | ELISPOT | IFNg release | Positive |
| 591602 | ACLGKAYAQMWTLMY   | NS5 | 3242 | 3256 | HLA-DRB1*04:01            | Dengue virus 3 | ELISPOT | IFNg release | Positive |
| 738537 | ASVNMVSRLLLNRF    | NS5 | 7    | 21   | HLA-DRB1*14:06            | Dengue virus 3 | ELISPOT | IFNg release | Positive |
| 738753 | EEFLDYMPMSMKRFRK  | NS5 | 3367 | 3381 | HLA-DRB1*14:02            | Dengue virus 3 | ELISPOT | IFNg release | Positive |
| 738759 | EFLDYMPMSMKRFRKE  | NS5 | 3368 | 3382 | HLA-DRB1*14:06            | Dengue virus 3 | ELISPOT | IFNg release | Positive |
| 738829 | ERELHKLKCGSCVY    | NS5 | 2927 | 2941 | HLA-DRB1*11:04            | Dengue virus 3 | ELISPOT | IFNg release | Positive |
| 740771 | YGLNTFTNMEVQLVR   | NS5 | 3096 | 3110 | HLA-DRB1*04:07            | Dengue virus 3 | ELISPOT | IFNg release | Positive |
| 857703 | IWYMWLGARYLEFEA   | NS5 | 2963 | 2977 | HLA-DPB1*04:01            | Dengue virus 3 | ELISPOT | IFNg release | Positive |
| 866168 | ARYLEFEALGFLNED   | NS5 | 2970 | 2984 | HLA-DQA1*03:01/DQB1*03:02 | Dengue virus 3 | ELISPOT | IFNg release | Positive |
| 867015 | GSCVYNMMGKREKRL   | NS5 | 2937 | 2951 | HLA-DRB5*01:01            | Dengue virus 3 | ELISPOT | IFNg release | Positive |
| 867376 | KAYAQMWSLMYFHRR   | NS5 | 3246 | 3260 | HLA-DRB5*01:01            | Dengue virus 3 | ELISPOT | IFNg release | Positive |
| 868338 | PMSTYGVWNIIVKLMSG | NS5 | 2605 | 2619 | HLA-DQA1*01:01/DQB1*05:01 | Dengue virus 3 | ELISPOT | IFNg release | Positive |
| 868748 | SAKLQWFVERNMVIP   | NS5 | 2549 | 2563 | HLA-DQA1*01:01/DQB1*05:01 | Dengue virus 3 | ELISPOT | IFNg release | Positive |
| 869489 | VKPIDDRFANALLAL   | NS5 | 3157 | 3171 | HLA-DPB1*01:01            | Dengue virus 3 | ELISPOT | IFNg release | Positive |
| 869705 | WYMWLGARYLEFEAL   | NS5 | 2964 | 2978 | HLA-DQA1*05:01/DQB1*02:01 | Dengue virus 3 | ELISPOT | IFNg release | Positive |



# CD4 DENV-4 Epitopes

| Epitope_ID | AminoAcid_Seq         | Protein_Name | Start | End  | Allele                    | Serotype       | Method/Technique | Assay Group  | Qualitative Measure |
|------------|-----------------------|--------------|-------|------|---------------------------|----------------|------------------|--------------|---------------------|
| 1067635    | LKRWGQLKKNKAIKI       | C            | 65    | 79   | HLA-DRB1*07:01            | Dengue virus 4 | ELISPOT          | IFNg release | Positive-Low        |
| 1068575    | VVRPPFNMLKRRNR        | C            | 7     | 21   | HLA-DRB1*11:01            | Dengue virus 4 | ELISPOT          | IFNg release | Positive-Low        |
| 17605      | FRKEIGRML             | C            | 83    | 91   | HLA-DPw4                  | Dengue virus 4 | 51 chromium      | cytotoxicity | Positive            |
| 195316     | FNMLKRRNRVSTPQ        | C            | 12    | 26   | HLA-DRB1*04:01            | Dengue virus 4 | ELISPOT          | IFNg release | Positive            |
| 195325     | FRKEIGRMLNILNGR       | C            | 19    | 33   | HLA-DRB1*04:01            | Dengue virus 4 | ELISPOT          | IFNg release | Positive            |
| 195483     | IGFRKEIGRMLNILN       | C            | 81    | 95   | HLA-DRB1*04:01            | Dengue virus 4 | ELISPOT          | IFNg release | Positive            |
| 195488     | IGRMLNILNRRKRST       | C            | 87    | 101  | HLA-DRB1*14:02            | Dengue virus 4 | ELISPOT          | IFNg release | Positive            |
| 195580     | KNKAIKILIGFRKEI       | C            | 53    | 67   | HLA-DRB1*15:01            | Dengue virus 4 | ELISPOT          | IFNg release | Positive            |
| 195587     | KRWGQLKKNKAIKIL       | C            | 46    | 60   | HLA-DRB1*08:03            | Dengue virus 4 | ELISPOT          | IFNg release | Positive            |
| 195651     | LKKNKAIKILTGFRK       | C            | 51    | 65   | HLA-DRB1*14:04            | Dengue virus 4 | ELISPOT          | IFNg release | Positive            |
| 195768     | MTLLCLIPTAMAFHL       | C            | 102   | 116  | HLA-DRB1*01:01            | Dengue virus 4 | ELISPOT          | IFNg release | Positive            |
| 195900     | RMVLAFITFLRVLSI       | C            | 44    | 58   | HLA-DRB1*11:01            | Dengue virus 4 | ELISPOT          | IFNg release | Positive            |
| 195922     | RWGQLKKTKAIKILT       | C            | 67    | 81   | HLA-DRB1*07:01            | Dengue virus 4 | ELISPOT          | IFNg release | Positive            |
| 196065     | TPQGLVKRFSSGLFS       | C            | 24    | 38   | HLA-DRB1*15:01            | Dengue virus 4 | ELISPOT          | IFNg release | Positive            |
| 196134     | VLAFITFLRVLSIPP       | C            | 26    | 40   | HLA-DRB1*04:01            | Dengue virus 4 | ELISPOT          | IFNg release | Positive            |
| 36533      | LIGFRKEIGRML          | C            | 80    | 91   | HLA-DPw4                  | Dengue virus 4 | ICS              | IFNg release | Positive            |
| 539044     | AFITFLRVLSIPPTA       | C            | 28    | 42   | HLA-DRB1*04:03            | Dengue virus 4 | ELISPOT          | IFNg release | Positive            |
| 539255     | FITFLRVLSIPPTAG       | C            | 49    | 63   | HLA-DRB1*04:07            | Dengue virus 4 | ELISPOT          | IFNg release | Positive            |
| 539294     | GFRKEIGRMLNILNG       | C            | 54    | 68   | HLA-DRB3*02:02            | Dengue virus 4 | ELISPOT          | IFNg release | Positive            |
| 539496     | KNKAIKILTGFRKEI       | C            | 53    | 67   | HLA-DRB1*12:02            | Dengue virus 4 | ELISPOT          | IFNg release | Positive            |
| 539536     | LAFITFLRVLSIPPT       | C            | 27    | 41   | HLA-DRB1*12:02            | Dengue virus 4 | ELISPOT          | IFNg release | Positive            |
| 539571     | LIGFRKEIGRMLNIL       | C            | 80    | 94   | HLA-DRB1*09:01            | Dengue virus 4 | ELISPOT          | IFNg release | Positive            |
| 539581     | LKKNKAIKILIGFRK       | C            | 51    | 65   | HLA-DRB1*14:04            | Dengue virus 4 | ELISPOT          | IFNg release | Positive            |
| 539632     | LTGFRKEIGRMLNIL       | C            | 52    | 66   | HLA-DRB3*02:02            | Dengue virus 4 | ELISPOT          | IFNg release | Positive            |
| 539898     | SGKGPLRMVLAFITF       | C            | 18    | 32   | HLA-DRB1*15:06            | Dengue virus 4 | ELISPOT          | IFNg release | Positive            |
| 539987     | TLLCLIPTVMAFHLS       | C            | 103   | 117  | HLA-DRB1*04:03            | Dengue virus 4 | ELISPOT          | IFNg release | Positive            |
| 540116     | WGQLKKNKAIKILIG       | C            | 68    | 82   | HLA-DRB1*09:01            | Dengue virus 4 | ELISPOT          | IFNg release | Positive            |
| 69367      | VLAFITFLR             | C            | 46    | 54   | HLA-DPw4                  | Dengue virus 4 | 51 chromium      | cytotoxicity | Positive            |
| 739059     | GRMLNILNGRKRSTI       | C            | 88    | 102  | HLA-DRB1*14:06            | Dengue virus 4 | ELISPOT          | IFNg release | Positive            |
| 739060     | GRMLNILNGRKRSTM       | C            | 88    | 102  | HLA-DRB1*14:02            | Dengue virus 4 | ELISPOT          | IFNg release | Positive            |
| 739175     | IGRMLNILNGRKRST       | C            | 87    | 101  | HLA-DRB1*14:02            | Dengue virus 4 | ELISPOT          | IFNg release | Positive            |
| 739178     | IGRMLNILNRRRRST       | C            | 87    | 101  | HLA-DRB1*14:02            | Dengue virus 4 | ELISPOT          | IFNg release | Positive            |
| 740156     | RPPFNMLKRRNRVS        | C            | 9     | 23   | HLA-DRB1*14:02            | Dengue virus 4 | ELISPOT          | IFNg release | Positive            |
| 868517     | QLKKNKAIKILTGFR       | C            | 42    | 56   | HLA-DQA1*01:02/DQB1*06:02 | Dengue virus 4 | ELISPOT          | IFNg release | Positive            |
| 868732     | RWGQLKKNKAIKILI       | C            | 39    | 53   | HLA-DRB3*02:02            | Dengue virus 4 | ELISPOT          | IFNg release | Positive            |
| 195283     | FALLAGFMAYMIGQT       | PreM         | 246   | 260  | HLA-DRB1*01:01            | Dengue virus 4 | ELISPOT          | IFNg release | Positive            |
| 195505     | ILRNPGFALLAGFMA       | PreM         | 240   | 254  | HLA-DRB1*01:01            | Dengue virus 4 | ELISPOT          | IFNg release | Positive            |
| 195526     | IQRVFFILMMLVAP        | PreM         | 262   | 276  | HLA-DRB1*07:01            | Dengue virus 4 | ELISPOT          | IFNg release | Positive            |
| 195901     | RNPGFALLAGFMAYM       | PreM         | 242   | 256  | HLA-DRB1*15:01            | Dengue virus 4 | ELISPOT          | IFNg release | Positive            |
| 195916     | RTVFFVLMMLVAPSY       | PreM         | 264   | 278  | HLA-DRB1*01:01            | Dengue virus 4 | ELISPOT          | IFNg release | Positive            |
| 539395     | IDCWCNLTSAWVMYG       | PreM         | 117   | 131  | HLA-DQA1*01:02/DQB1*06:02 | Dengue virus 4 | ELISPOT          | IFNg release | Positive            |
| 539820     | QRTVFFILMMLVAPS       | PreM         | 263   | 277  | HLA-DRB1*13:01            | Dengue virus 4 | ELISPOT          | IFNg release | Positive            |
| 867174     | IGQTGIQRTVFFILM       | PreM         | 257   | 271  | HLA-DPB1*02:01            | Dengue virus 4 | ELISPOT          | IFNg release | Positive            |
| 869119     | TEGINCTLIAMDLG        | PreM         | 113   | 127  | HLA-DQA1*01:02/DQB1*06:02 | Dengue virus 4 | ELISPOT          | IFNg release | Positive            |
| 869670     | WCNLTSTWVMYGTCT       | PreM         | 180   | 194  | HLA-DQA1*01:02/DQB1*06:02 | Dengue virus 4 | ELISPOT          | IFNg release | Positive            |
| 167808     | RDVNKEKVVGRVISSTPLAE  | E            | 340   | 359  | HLA class II              | Dengue virus 4 | ELISPOT          | IFNg release | Positive            |
| 195202     | CIAVGGITFLFGFTV       | E            | 758   | 772  | HLA-DRB1*15:01            | Dengue virus 4 | ELISPOT          | IFNg release | Positive            |
| 195227     | DSYVIGVGNSALT         | E            | 654   | 668  | HLA-DRB1*15:06            | Dengue virus 4 | ELISPOT          | IFNg release | Positive            |
| 195272     | ESTYRGAKRMAILGE       | E            | 682   | 696  | HLA-DRB1*15:06            | Dengue virus 4 | ELISPOT          | IFNg release | Positive            |
| 195358     | GGLFTSLGKAVHQVF       | E            | 705   | 719  | HLA-DRB1*11:01            | Dengue virus 4 | ELISPOT          | IFNg release | Positive            |
| 195364     | GGVSWMIRILIGILV       | E            | 449   | 463  | HLA-DRB1*15:06            | Dengue virus 4 | ELISPOT          | IFNg release | Positive            |
| 195434     | GVSWMIRILIGFLVL       | E            | 729   | 743  | HLA-DRB1*08:02            | Dengue virus 4 | ELISPOT          | IFNg release | Positive            |
| 195435     | GVSWMIRILIGLLVL       | E            | 729   | 743  | HLA-DRB1*15:06            | Dengue virus 4 | ELISPOT          | IFNg release | Positive            |
| 195436     | GVSWMVRILIGFLVL       | E            | 450   | 464  | HLA-DRB1*08:02            | Dengue virus 4 | ELISPOT          | IFNg release | Positive            |
| 195472     | IAVGGITLFLGFTVH       | E            | 480   | 494  | HLA-DRB1*15:01            | Dengue virus 4 | ELISPOT          | IFNg release | Positive            |
| 195473     | IAVGGITLFLGFTVQ       | E            | 759   | 773  | HLA-DRB1*15:01            | Dengue virus 4 | ELISPOT          | IFNg release | Positive            |
| 195625     | LESTYRGAKRMAILG       | E            | 681   | 695  | HLA-DRB1*14:02            | Dengue virus 4 | ELISPOT          | IFNg release | Positive            |
| 196036     | TGIQRTVFFVLMMLV       | E            | 44    | 58   | HLA-DRB1*07:01            | Dengue virus 4 | ELISPOT          | IFNg release | Positive            |
| 196189     | VSWIIRILIGLLVLW       | E            | 451   | 465  | HLA-DRB1*15:06            | Dengue virus 4 | ELISPOT          | IFNg release | Positive            |
| 539230     | EMILMKMKKTWLVH        | E            | 474   | 488  | HLA-DRB1*12:02            | Dengue virus 4 | ELISPOT          | IFNg release | Positive            |
| 539298     | GGVSWMVRILIGLLV       | E            | 449   | 463  | HLA-DRB1*15:06            | Dengue virus 4 | ELISPOT          | IFNg release | Positive            |
| 539379     | HAKRQDVTVLGSQEGAMH    | E            | 523   | 540  | HLA class II              | Dengue virus 4 | ICS              | IFNg release | Positive            |
| 539463     | KERMVTFKVPHPAKRG      | E            | 513   | 527  | HLA-DRB1*04:03            | Dengue virus 4 | ELISPOT          | IFNg release | Positive            |
| 539734     | NLEYTVVTVHNGDT        | E            | 197   | 211  | HLA-DRB1*04:07            | Dengue virus 4 | ELISPOT          | IFNg release | Positive            |
| 540036     | VGGLFTSLGKAVHQV       | E            | 704   | 718  | HLA-DRB1*09:01            | Dengue virus 4 | ELISPOT          | IFNg release | Positive            |
| 540051     | VLGSQEGAMHSALAGA      | E            | 531   | 546  | HLA class II              | Dengue virus 4 | ICS              | IFNg release | Positive            |
| 540080     | VRILIGFLVLWIGTN       | E            | 455   | 469  | HLA-DRB1*15:06            | Dengue virus 4 | ELISPOT          | IFNg release | Positive            |
| 738809     | ENLEYTVVTVHNGD        | E            | 196   | 210  | HLA-DRB1*04:07            | Dengue virus 4 | ELISPOT          | IFNg release | Positive            |
| 738886     | FESTYRGAKRMAILG       | E            | 681   | 695  | HLA-DRB1*14:02            | Dengue virus 4 | ELISPOT          | IFNg release | Positive            |
| 741747     | MRCVGVGNRDFEVGSGGAW   | E            | 280   | 299  | HLA class II              | Dengue virus 4 | ELISPOT          | IFNg release | Positive            |
| 195791     | NIMWKQITNELNYVL       | NS1          | 839   | 853  | HLA-DRB1*04:07            | Dengue virus 4 | ELISPOT          | IFNg release | Positive            |
| 195822     | NVMWKQITNELNYVL       | NS1          | 1     | 15   | HLA-DRB1*04:07            | Dengue virus 4 | ELISPOT          | IFNg release | Positive            |
| 539829     | QYQFPESPAPLASA        | NS1          | 805   | 819  | HLA-DRB1*09:01            | Dengue virus 4 | ELISPOT          | IFNg release | Positive            |
| 866696     | FGMFTTNIMWKMFREG      | NS1          | 934   | 948  | HLA-DPB1*04:01            | Dengue virus 4 | ELISPOT          | IFNg release | Positive            |
| 867043     | HADMGYWIESSKNQT       | NS1          | 969   | 983  | HLA-DQA1*01:01/DQB1*05:01 | Dengue virus 4 | ELISPOT          | IFNg release | Positive            |
| 167725     | AMITTLTSLPHDLMELIDGIS | NS2a         | 50    | 69   | HLA class II              | Dengue virus 4 | ELISPOT          | IFNg release | Positive            |
| 195156     | ALSLTFTIRSTMPLVM      | NS2a         | 1274  | 1288 | HLA-DRB1*07:01            | Dengue virus 4 | ELISPOT          | IFNg release | Positive            |
| 195157     | ALSLTFTIRSTMSLVM      | NS2a         | 1274  | 1288 | HLA-DRB1*04:01            | Dengue virus 4 | ELISPOT          | IFNg release | Positive            |
| 195158     | ALSLTFTIRSTTPLVM      | NS2a         | 1274  | 1288 | HLA-DRB1*07:01            | Dengue virus 4 | ELISPOT          | IFNg release | Positive            |
| 195190     | AVFKMSPGVVLGVFL       | NS2a         | 1204  | 1218 | HLA-DRB1*01:01            | Dengue virus 4 | ELISPOT          | IFNg release | Positive            |
| 195220     | DLMEFDIGISLGLIL       | NS2a         | 1244  | 1258 | HLA-DRB1*07:01            | Dengue virus 4 | ELISPOT          | IFNg release | Positive            |
| 195221     | DLMELISGISLGLIL       | NS2a         | 1243  | 1257 | HLA-DRB1*07:01            | Dengue virus 4 | ELISPOT          | IFNg release | Positive            |
| 195541     | ITALILGAQALPVYL       | NS2a         | 1320  | 1334 | HLA-DRB1*01:01            | Dengue virus 4 | ELISPOT          | IFNg release | Positive            |
| 195571     | KHMLLVVVTTLCAII       | NS2a         | 1156  | 1170 | HLA-DRB1*08:02            | Dengue virus 4 | ELISPOT          | IFNg release | Positive            |
| 195608     | LAIMAVFKMSPGVYL       | NS2a         | 1200  | 1214 | HLA-DRB1*13:01            | Dengue virus 4 | ELISPOT          | IFNg release | Positive            |



|         |                   |      |      |      |                           |                |                     |              |          |
|---------|-------------------|------|------|------|---------------------------|----------------|---------------------|--------------|----------|
| 195699  | LQKQSHWVEITALIL   | NS2a | 1311 | 1325 | HLA-DRB1*07:01            | Dengue virus 4 | ELISPOT             | IFNg release | Positive |
| 195746  | MAVFKMSPGYLVGVF   | NS2a | 1203 | 1217 | HLA-DRB1*07:01            | Dengue virus 4 | ELISPOT             | IFNg release | Positive |
| 195837  | PLVMAWRTIMAVLFV   | NS2a | 1285 | 1299 | HLA-DRB1*01:01            | Dengue virus 4 | ELISPOT             | IFNg release | Positive |
| 195864  | QSHWVEITALILGAQ   | NS2a | 1314 | 1328 | HLA-DRB1*07:01            | Dengue virus 4 | ELISPOT             | IFNg release | Positive |
| 196060  | TQPLVMAWRTIMAVL   | NS2a | 1283 | 1297 | HLA-DRB1*03:01            | Dengue virus 4 | ELISPOT             | IFNg release | Positive |
| 196061  | TMSLVMAWRTIMAVL   | NS2a | 1283 | 1297 | HLA-DRB1*03:01            | Dengue virus 4 | ELISPOT             | IFNg release | Positive |
| 196070  | TRKHMILAVVITLCA   | NS2a | 1154 | 1168 | HLA-DRB1*08:02            | Dengue virus 4 | ELISPOT             | IFNg release | Positive |
| 196227  | VWEITALILGAQALP   | NS2a | 1317 | 1331 | HLA-DRB1*01:01            | Dengue virus 4 | ELISPOT             | IFNg release | Positive |
| 196252  | YVLGIFLRKLTSTRET  | NS2a | 1212 | 1226 | HLA-DRB1*11:01            | Dengue virus 4 | ELISPOT             | IFNg release | Positive |
| 196253  | YVLGVFLRKLTSTRET  | NS2a | 1212 | 1226 | HLA-DRB1*11:01            | Dengue virus 4 | ELISPOT             | IFNg release | Positive |
| 539130  | CLRRRVTRKHMILAV   | NS2a | 1148 | 1162 | HLA-DRB1*08:03            | Dengue virus 4 | ELISPOT             | IFNg release | Positive |
| 539131  | CLRRRVTRKHMILVV   | NS2a | 1148 | 1162 | HLA-DRB1*08:03            | Dengue virus 4 | ELISPOT             | IFNg release | Positive |
| 539198  | ECLRRRVTRKHMILA   | NS2a | 1147 | 1161 | HLA-DRB1*13:01            | Dengue virus 4 | ELISPOT             | IFNg release | Positive |
| 539360  | GVFLRKLTSTRETALM  | NS2a | 1215 | 1229 | HLA-DRB1*10:01            | Dengue virus 4 | ELISPOT             | IFNg release | Positive |
| 539406  | IGGQIHLMIAVFKM    | NS2a | 1194 | 1208 | HLA-DRB1*13:01            | Dengue virus 4 | ELISPOT             | IFNg release | Positive |
| 539407  | IGGQTHLMIAVFKM    | NS2a | 1194 | 1208 | HLA-DRB1*13:01            | Dengue virus 4 | ELISPOT             | IFNg release | Positive |
| 539433  | IRSTMPLVMMAVRTIM  | NS2a | 1280 | 1294 | HLA-DRB1*13:01            | Dengue virus 4 | ELISPOT             | IFNg release | Positive |
| 539434  | IRSTMSLVMAVRTIM   | NS2a | 1280 | 1294 | HLA-DRB1*13:01            | Dengue virus 4 | ELISPOT             | IFNg release | Positive |
| 539555  | LGIFLRKLTSTRETAL  | NS2a | 1214 | 1228 | HLA-DRB1*08:03            | Dengue virus 4 | ELISPOT             | IFNg release | Positive |
| 539565  | LGIVFLRKLTSTRETAL | NS2a | 1214 | 1228 | HLA-DRB1*08:03            | Dengue virus 4 | ELISPOT             | IFNg release | Positive |
| 539627  | LSLTFIRSTMPLVMA   | NS2a | 1275 | 1289 | HLA-DRB1*10:01            | Dengue virus 4 | ELISPOT             | IFNg release | Positive |
| 539628  | LSLTFIRSTPLVMA    | NS2a | 1275 | 1289 | HLA-DRB1*08:03            | Dengue virus 4 | ELISPOT             | IFNg release | Positive |
| 539664  | MGGQIHLMIAVFKM    | NS2a | 1194 | 1208 | HLA-DRB1*13:01            | Dengue virus 4 | ELISPOT             | IFNg release | Positive |
| 539687  | MPLVMAWRTIMAVLF   | NS2a | 1284 | 1298 | HLA-DRB1*12:02            | Dengue virus 4 | ELISPOT             | IFNg release | Positive |
| 539919  | SLTFIRSTMPLVMAW   | NS2a | 1276 | 1290 | HLA-DRB1*09:01            | Dengue virus 4 | ELISPOT             | IFNg release | Positive |
| 539921  | SLTFIRSTPLIMAW    | NS2a | 1276 | 1290 | HLA-DRB1*04:03            | Dengue virus 4 | ELISPOT             | IFNg release | Positive |
| 539930  | SRETALMVIGMAMTT   | NS2a | 1223 | 1237 | HLA-DRB1*15:06            | Dengue virus 4 | ELISPOT             | IFNg release | Positive |
| 539937  | STMPLVMAWRTIMAV   | NS2a | 1282 | 1296 | HLA-DRB1*13:01            | Dengue virus 4 | ELISPOT             | IFNg release | Positive |
| 539961  | TALMVIGMAMTTLS    | NS2a | 1226 | 1240 | HLA-DRB1*01:02            | Dengue virus 4 | ELISPOT             | IFNg release | Positive |
| 539962  | TALMVIGMAMTTVLS   | NS2a | 1226 | 1240 | HLA-DRB1*15:06            | Dengue virus 4 | ELISPOT             | IFNg release | Positive |
| 540033  | VFKMSPGYLVGVFLR   | NS2a | 1205 | 1219 | HLA-DRB1*09:01            | Dengue virus 4 | ELISPOT             | IFNg release | Positive |
| 540053  | LVGVFLRKLTSTRETA  | NS2a | 1213 | 1227 | HLA-DRB1*14:04            | Dengue virus 4 | ELISPOT             | IFNg release | Positive |
| 738559  | AVVITLCAILGGTL    | NS2a | 1161 | 1175 | HLA-DRB1*01:02            | Dengue virus 4 | ELISPOT             | IFNg release | Positive |
| 738742  | ECLRRRVTRKHMILV   | NS2a | 1147 | 1161 | HLA-DRB1*14:02            | Dengue virus 4 | ELISPOT             | IFNg release | Positive |
| 740701  | VVTLPICRSTCLQK    | NS2a | 1299 | 1313 | HLA-DRB1*11:04            | Dengue virus 4 | ELISPOT             | IFNg release | Positive |
| 867048  | HDLMEFDIGISLGLI   | NS2a | 1243 | 1257 | HLA-DQA1*01:01/DQB1*05:01 | Dengue virus 4 | ELISPOT             | IFNg release | Positive |
| 867110  | HWVEITALILGAQAL   | NS2a | 1316 | 1330 | HLA-DQA1*03:01/DQB1*03:02 | Dengue virus 4 | ELISPOT             | IFNg release | Positive |
| 867874  | LMVIGMAMTTVLSIP   | NS2a | 1228 | 1242 | HLA-DQA1*01:02/DQB1*06:02 | Dengue virus 4 | ELISPOT             | IFNg release | Positive |
| 867969  | LTFIRSTPLVMAWR    | NS2a | 1277 | 1291 | HLA-DRB3*02:02            | Dengue virus 4 | ELISPOT             | IFNg release | Positive |
| 195404  | GLVSLGSAKLNNDV    | NS2b | 9    | 23   | HLA-DRB1*01:02            | Dengue virus 4 | ELISPOT             | IFNg release | Positive |
| 195511  | IMAVGLVSLGSAALL   | NS2b | 1352 | 1366 | HLA-DRB1*01:01            | Dengue virus 4 | ELISPOT             | IFNg release | Positive |
| 195662  | LLLAAYVMSSGSSADL  | NS2b | 1381 | 1395 | HLA-DRB1*04:01            | Dengue virus 4 | ELISPOT             | IFNg release | Positive |
| 195748  | MAVGLVSLGSAALLK   | NS2b | 1353 | 1367 | HLA-DRB1*01:01            | Dengue virus 4 | ELISPOT             | IFNg release | Positive |
| 195931  | SALKKNDVPLAGPMV   | NS2b | 1363 | 1377 | HLA-DRB1*03:01            | Dengue virus 4 | ELISPOT             | IFNg release | Positive |
| 196062  | TNMITLLVKLALITV   | NS2b | 1436 | 1450 | HLA-DRB1*08:02            | Dengue virus 4 | ELISPOT             | IFNg release | Positive |
| 539101  | AVGLVSLGSAALLKN   | NS2b | 1354 | 1368 | HLA-DRB1*10:01            | Dengue virus 4 | ELISPOT             | IFNg release | Positive |
| 869635  | VTMTLVWYMWQVKTQR  | NS2b | 1460 | 1474 | HLA-DPB1*01:01            | Dengue virus 4 | ELISPOT             | IFNg release | Positive |
| 1067119 | GKGVILGYNGVVTKS   | NS3  | 1618 | 1632 | HLA-DRB1*15:01            | Dengue virus 4 | ELISPOT             | IFNg release | Positive |
| 12605   | EIVDLMCHAT        | NS3  | 255  | 264  | HLA-DPW2                  | Dengue virus 4 | 51 chromium         | cytotoxicity | Positive |
| 1392192 | GREIVDLMCHATFTT   | NS3  | 1727 | 1741 |                           | Dengue virus 4 | biological activity | activation   | Positive |
| 156711  | LAPTRVVAAMEEAL    | NS3  | 1695 | 1709 | HLA class II              | Dengue virus 4 | 51 chromium         | cytotoxicity | Positive |
| 195244  | EGVYRIMQRGLFGKT   | NS3  | 1494 | 1508 | HLA-DRB1*11:01            | Dengue virus 4 | ELISPOT             | IFNg release | Positive |
| 195298  | FHTMWHVTRGSVICH   | NS3  | 1520 | 1534 | HLA-DRB1*07:01            | Dengue virus 4 | ELISPOT             | IFNg release | Positive |
| 195353  | GEIGAVTLDFKPGTS   | NS3  | 1595 | 1609 | HLA-DRB1*03:01            | Dengue virus 4 | ELISPOT             | IFNg release | Positive |
| 195563  | KGKVIGLYNGGVVTK   | NS3  | 5    | 19   | HLA-DRB1*15:01            | Dengue virus 4 | ELISPOT             | IFNg release | Positive |
| 195695  | LPVWLSYKVASAGIS   | NS3  | 2016 | 2030 | HLA-DRB1*08:02            | Dengue virus 4 | ELISPOT             | IFNg release | Positive |
| 195838  | PNYNLIVMDEAHFTD   | NS3  | 1750 | 1764 | HLA-DRB1*03:01            | Dengue virus 4 | ELISPOT             | IFNg release | Positive |
| 195962  | SIVREALKRRLRTL    | NS3  | 1680 | 1694 | HLA-DRB1*11:01            | Dengue virus 4 | ELISPOT             | IFNg release | Positive |
| 196032  | TEGVYRIMQRGLFGK   | NS3  | 146  | 160  | HLA-DRB1*11:01            | Dengue virus 4 | ELISPOT             | IFNg release | Positive |
| 33192   | KRLTIMDLHPGAGKT   | NS3  | 186  | 200  | HLA class II              | Dengue virus 4 | ICS                 | IFNg release | Positive |
| 45689   | NRKGKIVGLYNGGVV   | NS3  | 141  | 155  | HLA-DRB1*15:01            | Dengue virus 4 | ICS                 | IFNg release | Positive |
| 53505   | REGKKKLRRPWLDR    | NS3  | 585  | 599  | HLA class II              | Dengue virus 4 | ICS                 | IFNg release | Positive |
| 539020  | AAAFMTATPPGATD    | NS3  | 1783 | 1797 | HLA-DRB1*10:01            | Dengue virus 4 | ELISPOT             | IFNg release | Positive |
| 539021  | AAAFMTATPPGSID    | NS3  | 1783 | 1797 | HLA-DRB1*04:07            | Dengue virus 4 | ELISPOT             | IFNg release | Positive |
| 539023  | AAAFMTATPPGTID    | NS3  | 1783 | 1797 | HLA-DRB1*04:03            | Dengue virus 4 | ELISPOT             | IFNg release | Positive |
| 539024  | AAAFMTATPPGTID    | NS3  | 1783 | 1797 | HLA-DRB1*04:03            | Dengue virus 4 | ELISPOT             | IFNg release | Positive |
| 539026  | AAAFMTATPPGATDP   | NS3  | 1784 | 1798 | HLA-DRB1*09:01            | Dengue virus 4 | ELISPOT             | IFNg release | Positive |
| 539080  | ALRGLPIRYQTPAVK   | NS3  | 96   | 110  | HLA-DRB1*13:01            | Dengue virus 4 | ELISPOT             | IFNg release | Positive |
| 539359  | GVFHTMWHVTRGSVI   | NS3  | 1518 | 1532 | HLA-DRB1*08:03            | Dengue virus 4 | ELISPOT             | IFNg release | Positive |
| 539520  | KVIGLYNGGVVTKSG   | NS3  | 7    | 21   | HLA-DRB1*15:06            | Dengue virus 4 | ELISPOT             | IFNg release | Positive |
| 539547  | LFKTLTGEIHAVTLD   | NS3  | 1589 | 1603 | HLA-DRB1*10:01            | Dengue virus 4 | ELISPOT             | IFNg release | Positive |
| 539767  | PGLFKTLTGEIAVAT   | NS3  | 1587 | 1601 | HLA-DRB1*10:01            | Dengue virus 4 | ELISPOT             | IFNg release | Positive |
| 539803  | QGKTVMFVPSIKAGN   | NS3  | 1829 | 1843 | HLA-DRB1*08:03            | Dengue virus 4 | ELISPOT             | IFNg release | Positive |
| 539859  | RKSGKKVIQLSRKTF   | NS3  | 1850 | 1864 | HLA-DRB1*08:03            | Dengue virus 4 | ELISPOT             | IFNg release | Positive |
| 539899  | SGKKVIQLSRKTFDT   | NS3  | 1852 | 1866 | HLA-DRB1*12:02            | Dengue virus 4 | ELISPOT             | IFNg release | Positive |
| 540077  | VREAKRRLRTL VLA   | NS3  | 1682 | 1696 | HLA-DRB1*08:03            | Dengue virus 4 | ELISPOT             | IFNg release | Positive |
| 68977   | VIGLYNGGV         | NS3  | 146  | 154  | HLA-DRB1*15:01            | Dengue virus 4 | 51 chromium         | cytotoxicity | Positive |
| 739036  | GLPIRYQTPAVKSEH   | NS3  | 1711 | 1725 | HLA-DRB1*14:06            | Dengue virus 4 | ELISPOT             | IFNg release | Positive |
| 739563  | LRGLPIRYQTPAVKS   | NS3  | 1709 | 1723 | HLA-DRB1*14:06            | Dengue virus 4 | ELISPOT             | IFNg release | Positive |
| 863140  | TRVEMGEAAIFMTA    | NS3  | 1776 | 1790 | HLA-DQA1*03:01/DQB1*03:02 | Dengue virus 4 | ELISPOT             | IFNg release | Positive |
| 867453  | KLTDWDFVVTDISE    | NS3  | 1872 | 1886 | HLA-DQA1*03:01/DQB1*03:02 | Dengue virus 4 | ELISPOT             | IFNg release | Positive |
| 868371  | PRWLDARVYADPMAL   | NS3  | 2067 | 2081 | HLA-DQA1*03:01/DQB1*03:02 | Dengue virus 4 | ELISPOT             | IFNg release | Positive |
| 167758  | ILTEIASLPTLSSRAKL | NS4a | 6    | 23   | HLA-DP                    | Dengue virus 4 | ELISPOT             | IFNg release | Positive |
| 195176  | ASLPTLSSRAKLAL    | NS4a | 2103 | 2117 | HLA-DRB1*07:01            | Dengue virus 4 | ELISPOT             | IFNg release | Positive |
| 195224  | DNQLIYVILTITII    | NS4a | 2223 | 2237 | HLA-DRB1*15:01            | Dengue virus 4 | ELISPOT             | IFNg release | Positive |
| 195274  | ETLMLVALLGAMTAV   | NS4a | 2145 | 2159 | HLA-DRB1*08:02            | Dengue virus 4 | ELISPOT             | IFNg release | Positive |
| 195386  | GLITIAVASGLLWVA   | NS4a | 2176 | 2190 | HLA-DRB1*07:01            | Dengue virus 4 | ELISPOT             | IFNg release | Positive |
| 195551  | IYVILTITIALVA     | NS4a | 2227 | 2241 | HLA-DRB1*01:01            | Dengue virus 4 | ELISPOT             | IFNg release | Positive |



|         |                   |      |      |      |                           |                |         |              |              |
|---------|-------------------|------|------|------|---------------------------|----------------|---------|--------------|--------------|
| 195575  | KLMSGLIAIVASGL    | NS4a | 2172 | 2186 | HLA-DRB1*08:02            | Dengue virus 4 | ELISPOT | IFNg release | Positive     |
| 195648  | LIYVILTILIALV     | NS4a | 2226 | 2240 | HLA-DRB1*07:01            | Dengue virus 4 | ELISPOT | IFNg release | Positive     |
| 195809  | NQLIYVILTITIIG    | NS4a | 2224 | 2238 | HLA-DRB1*08:02            | Dengue virus 4 | ELISPOT | IFNg release | Positive     |
| 195853  | QLIYVILTIAIGL     | NS4a | 2225 | 2239 | HLA-DRB1*15:02            | Dengue virus 4 | ELISPOT | IFNg release | Positive     |
| 195876  | RAKLALDNIVMLHTT   | NS4a | 2112 | 2126 | HLA-DRB1*03:01            | Dengue virus 4 | ELISPOT | IFNg release | Positive     |
| 196058  | TLMLVALLGAMTAGI   | NS4a | 2146 | 2160 | HLA-DRB1*01:01            | Dengue virus 4 | ELISPOT | IFNg release | Positive     |
| 196250  | YVILAILTIGLVAA    | NS4a | 2228 | 2242 | HLA-DRB1*08:02            | Dengue virus 4 | ELISPOT | IFNg release | Positive     |
| 196251  | YVILALLTISLIAA    | NS4a | 2228 | 2242 | HLA-DRB1*15:02            | Dengue virus 4 | ELISPOT | IFNg release | Positive     |
| 539165  | DILTEIASLPTYLSS   | NS4a | 2097 | 2111 | HLA-DRB1*04:07            | Dengue virus 4 | ELISPOT | IFNg release | Positive     |
| 539313  | GKAYQHAIINELPESL  | NS4a | 2130 | 2144 | HLA-DRB1*10:01            | Dengue virus 4 | ELISPOT | IFNg release | Positive     |
| 539631  | LTEIASLPTYLSSRA   | NS4a | 2099 | 2113 | HLA-DRB1*04:03            | Dengue virus 4 | ELISPOT | IFNg release | Positive     |
| 539638  | LVALLGAMTAGIFLF   | NS4a | 2149 | 2163 | HLA-DRB1*09:01            | Dengue virus 4 | ELISPOT | IFNg release | Positive     |
| 539666  | MGLITIAVASGLLVV   | NS4a | 2175 | 2189 | HLA-DRB1*09:01            | Dengue virus 4 | ELISPOT | IFNg release | Positive     |
| 738568  | AYQHAIINELPESLET  | NS4a | 2132 | 2146 | HLA-DRB1*04:07            | Dengue virus 4 | ELISPOT | IFNg release | Positive     |
| 867726  | LIYVILTITIIGLI    | NS4a | 2226 | 2240 | HLA-DRB1*04:02            | Dengue virus 4 | ELISPOT | IFNg release | Positive     |
| 868951  | SLPTYLSSRAKLALD   | NS4a | 2104 | 2118 | HLA-DRB3*02:02            | Dengue virus 4 | ELISPOT | IFNg release | Positive     |
| 195177  | ASLVMLLVHAIIGP    | NS4b | 2348 | 2362 | HLA-DRB1*13:01            | Dengue virus 4 | ELISPOT | IFNg release | Positive     |
| 195214  | DFGFYQVKTTETILD   | NS4b | 2254 | 2268 | HLA-DRB1*04:01            | Dengue virus 4 | ELISPOT | IFNg release | Positive     |
| 195219  | DLEPISYDPKFEKQL   | NS4b | 2393 | 2407 | HLA-DRB1*03:01            | Dengue virus 4 | ELISPOT | IFNg release | Positive     |
| 195276  | ETILDVDLRPASAW    | NS4b | 2263 | 2277 | HLA-DRB1*03:01            | Dengue virus 4 | ELISPOT | IFNg release | Positive     |
| 195383  | GLAFSLIKNAQTPRR   | NS4b | 2473 | 2487 | HLA-DRB1*04:01            | Dengue virus 4 | ELISPOT | IFNg release | Positive     |
| 195592  | KTETILDVDLRPAS    | NS4b | 2261 | 2275 | HLA-DRB1*03:01            | Dengue virus 4 | ELISPOT | IFNg release | Positive     |
| 195616  | LCAGQLLLMRTTWAF   | NS4b | 2415 | 2429 | HLA-DRB1*04:01            | Dengue virus 4 | ELISPOT | IFNg release | Positive     |
| 195719  | LTASLAMLVHYAI     | NS4b | 2346 | 2360 | HLA-DRB1*07:01            | Dengue virus 4 | ELISPOT | IFNg release | Positive     |
| 195720  | LTASLVMLLVHYAI    | NS4b | 2346 | 2360 | HLA-DRB1*12:02            | Dengue virus 4 | ELISPOT | IFNg release | Positive     |
| 196048  | TILDVDLRPASAWTL   | NS4b | 2265 | 2279 | HLA-DRB1*03:01            | Dengue virus 4 | ELISPOT | IFNg release | Positive     |
| 196052  | TKTDFGFYQVKTTET   | NS4b | 2251 | 2265 | HLA-DRB1*04:01            | Dengue virus 4 | ELISPOT | IFNg release | Positive     |
| 196055  | TUJASLVMLLVHYAI   | NS4b | 2345 | 2359 | HLA-DRB1*01:01            | Dengue virus 4 | ELISPOT | IFNg release | Positive     |
| 196082  | TLIASLVMLLVHYA    | NS4b | 2344 | 2358 | HLA-DRB1*13:01            | Dengue virus 4 | ELISPOT | IFNg release | Positive     |
| 196208  | WAFCEVLATATGPIL   | NS4b | 2427 | 2441 | HLA-DRB1*07:01            | Dengue virus 4 | ELISPOT | IFNg release | Positive     |
| 196209  | WAFCEVLATATGPVL   | NS4b | 2427 | 2441 | HLA-DRB1*07:01            | Dengue virus 4 | ELISPOT | IFNg release | Positive     |
| 196226  | WTLVAVATTITPML    | NS4b | 2277 | 2291 | HLA-DRB1*07:01            | Dengue virus 4 | ELISPOT | IFNg release | Positive     |
| 539057  | AGQLLLMRTTWAFCE   | NS4b | 2417 | 2431 | HLA-DRB1*13:01            | Dengue virus 4 | ELISPOT | IFNg release | Positive     |
| 539185  | DVDLRPASAWTLAYV   | NS4b | 2268 | 2282 | HLA-DRB1*09:01            | Dengue virus 4 | ELISPOT | IFNg release | Positive     |
| 539584  | LLAMGCYSQVNPPTL   | NS4b | 2332 | 2346 | HLA-DRB1*09:01            | Dengue virus 4 | ELISPOT | IFNg release | Positive     |
| 539639  | LVHYAIIGPGLQAKA   | NS4b | 2354 | 2368 | HLA-DQA1*05:01/DQB1*02:01 | Dengue virus 4 | ELISPOT | IFNg release | Positive     |
| 539661  | MGCYSQVNPPTLIAS   | NS4b | 2335 | 2349 | HLA-DRB1*09:01            | Dengue virus 4 | ELISPOT | IFNg release | Positive     |
| 738447  | AFSLIKNAQTPRRGT   | NS4b | 2475 | 2489 | HLA-DRB1*14:06            | Dengue virus 4 | ELISPOT | IFNg release | Positive     |
| 738500  | AMGCYSQVNPPTLIA   | NS4b | 2334 | 2348 | HLA-DRB1*04:07            | Dengue virus 4 | ELISPOT | IFNg release | Positive     |
| 738897  | FGFYQVKTTETILDV   | NS4b | 2255 | 2269 | HLA-DRB1*04:07            | Dengue virus 4 | ELISPOT | IFNg release | Positive     |
| 739202  | ILDVDLRPASAWTLY   | NS4b | 2266 | 2280 | HLA-DRB1*01:02            | Dengue virus 4 | ELISPOT | IFNg release | Positive     |
| 739417  | LAFLSLIKNAQTPRRG  | NS4b | 2474 | 2488 | HLA-DRB1*14:02            | Dengue virus 4 | ELISPOT | IFNg release | Positive     |
| 867009  | GRFWNTTIAVSTANI   | NS4b | 2449 | 2463 | HLA-DQA1*01:02/DQB1*06:02 | Dengue virus 4 | ELISPOT | IFNg release | Positive     |
| 1066543 | ACLGKAYAQMWVSLMY  | NS5  | 3240 | 3254 | HLA-DRB1*04:01            | Dengue virus 4 | ELISPOT | IFNg release | Positive-Low |
| 195230  | DYMPVMKRYSAPESS   | NS5  | 3369 | 3383 | HLA-DRB1*11:01            | Dengue virus 4 | ELISPOT | IFNg release | Positive     |
| 195235  | EEFISKVRSNAIGA    | NS5  | 2884 | 2898 | HLA-DRB1*08:02            | Dengue virus 4 | ELISPOT | IFNg release | Positive     |
| 195240  | EEYVDYMPVMKRYSA   | NS5  | 3365 | 3379 | HLA-DRB1*11:01            | Dengue virus 4 | ELISPOT | IFNg release | Positive     |
| 195279  | EYVDYMPVMKRYSAPE  | NS5  | 3366 | 3380 | HLA-DRB1*11:01            | Dengue virus 4 | ELISPOT | IFNg release | Positive     |
| 195411  | GNIVSSVNTTSKMLL   | NS5  | 2713 | 2727 | HLA-DRB1*04:01            | Dengue virus 4 | ELISPOT | IFNg release | Positive     |
| 195454  | HHFHKIFMKDGRSLV   | NS5  | 3199 | 3213 | HLA-DRB1*03:01            | Dengue virus 4 | ELISPOT | IFNg release | Positive     |
| 195499  | ILAKAIFKLTYYQNKV  | NS5  | 3050 | 3064 | HLA-DRB1*07:01            | Dengue virus 4 | ELISPOT | IFNg release | Positive     |
| 195593  | KTFMKDGRSLVPPCR   | NS5  | 3202 | 3216 | HLA-DRB1*03:01            | Dengue virus 4 | ELISPOT | IFNg release | Positive     |
| 195737  | LWCGSLIGLSSRATW   | NS5  | 3333 | 3347 | HLA-DRB1*11:01            | Dengue virus 4 | ELISPOT | IFNg release | Positive     |
| 195764  | MPVMKRYSAPESEGE   | NS5  | 3371 | 3385 | HLA-DRB1*08:02            | Dengue virus 4 | ELISPOT | IFNg release | Positive     |
| 195815  | NRVWIEDNPNMTDKT   | NS5  | 3302 | 3316 | HLA-DRB1*03:01            | Dengue virus 4 | ELISPOT | IFNg release | Positive     |
| 195823  | NWLWALLGKKKNPRL   | NS5  | 2866 | 2880 | HLA-DRB1*14:02            | Dengue virus 4 | ELISPOT | IFNg release | Positive     |
| 195835  | PKPGTRMVMTTANW    | NS5  | 2853 | 2867 | HLA-DRB1*04:01            | Dengue virus 4 | ELISPOT | IFNg release | Positive     |
| 195858  | QMWVSLMYFHRDLRL   | NS5  | 3248 | 3262 | HLA-DRB1*15:01            | Dengue virus 4 | ELISPOT | IFNg release | Positive     |
| 195879  | REEFISKVRSNAIGA   | NS5  | 2883 | 2897 | HLA-DRB1*04:01            | Dengue virus 4 | ELISPOT | IFNg release | Positive     |
| 195919  | RVWIEDNPNMIDKTP   | NS5  | 3303 | 3317 | HLA-DRB1*03:01            | Dengue virus 4 | ELISPOT | IFNg release | Positive     |
| 196071  | TRMVMTTANWLVWAL   | NS5  | 2857 | 2871 | HLA-DRB1*04:01            | Dengue virus 4 | ELISPOT | IFNg release | Positive     |
| 196092  | TYQNKVNTLVRPTPR   | NS5  | 3059 | 3073 | HLA-DRB1*08:02            | Dengue virus 4 | ELISPOT | IFNg release | Positive     |
| 196105  | VDYMPVMKRYSAPEF   | NS5  | 3368 | 3382 | HLA-DRB1*11:01            | Dengue virus 4 | ELISPOT | IFNg release | Positive     |
| 196106  | VDYMPVMKRYSAPESE  | NS5  | 3368 | 3382 | HLA-DRB1*11:01            | Dengue virus 4 | ELISPOT | IFNg release | Positive     |
| 196230  | YAQMWVSLMYFHRDL   | NS5  | 3246 | 3260 | HLA-DRB1*15:01            | Dengue virus 4 | ELISPOT | IFNg release | Positive     |
| 539149  | DCVVKPLDERFSTLLF  | NS5  | 3152 | 3166 | HLA class II              | Dengue virus 4 | ICS     | IFNg release | Positive     |
| 539222  | EKPDMTIIGRRLQRL   | NS5  | 2757 | 2771 | HLA-DRB1*12:02            | Dengue virus 4 | ELISPOT | IFNg release | Positive     |
| 539251  | FEFYKRSGLIEDVRT   | NS5  | 2512 | 2526 | HLA-DRB1*09:01            | Dengue virus 4 | ELISPOT | IFNg release | Positive     |
| 539354  | GTRMVMTTANWLVWA   | NS5  | 2856 | 2870 | HLA-DRB1*04:03            | Dengue virus 4 | ELISPOT | IFNg release | Positive     |
| 539456  | KAIFKLTYYQNKVVKV  | NS5  | 3053 | 3067 | HLA-DRB1*09:01            | Dengue virus 4 | ELISPOT | IFNg release | Positive     |
| 539493  | KMLNRFTRHRKPT     | NS5  | 2724 | 2738 | HLA-DRB1*13:01            | Dengue virus 4 | ELISPOT | IFNg release | Positive     |
| 539498  | KPDMTIIGRRLQRLQ   | NS5  | 2758 | 2772 | HLA-DRB1*08:03            | Dengue virus 4 | ELISPOT | IFNg release | Positive     |
| 539553  | LGEFGRAKGSRAIWY   | NS5  | 2949 | 2963 | HLA-DRB1*09:01            | Dengue virus 4 | ELISPOT | IFNg release | Positive     |
| 539656  | MAISGDDCVVKPLDERF | NS5  | 3146 | 3162 | HLA class II              | Dengue virus 4 | ICS     | IFNg release | Positive     |
| 539703  | MVTQLAMTDITPPGQQR | NS5  | 2824 | 2840 | HLA class II              | Dengue virus 4 | ICS     | IFNg release | Positive     |
| 539769  | PGTRMVMTTANWLVW   | NS5  | 2855 | 2869 | HLA-DRB1*04:03            | Dengue virus 4 | ELISPOT | IFNg release | Positive     |
| 539770  | PHHKILAKAIFKLTY   | NS5  | 3046 | 3060 | HLA-DRB1*12:02            | Dengue virus 4 | ELISPOT | IFNg release | Positive     |
| 540007  | TTSKMLLNRFTRHR    | NS5  | 2721 | 2735 | HLA-DRB1*13:01            | Dengue virus 4 | ELISPOT | IFNg release | Positive     |
| 540041  | VGTYGLNTFTNMEVQ   | NS5  | 3091 | 3105 | HLA-DRB1*15:06            | Dengue virus 4 | ELISPOT | IFNg release | Positive     |
| 739405  | KVRSNAAGAVGFQEE   | NS5  | 2889 | 2903 | HLA-DRB1*01:02            | Dengue virus 4 | ELISPOT | IFNg release | Positive     |
| 740013  | QLIRQMEAGVITQD    | NS5  | 3105 | 3119 | HLA-DRB1*01:02            | Dengue virus 4 | ELISPOT | IFNg release | Positive     |
| 866364  | DERFSTLLFLNDMG    | NS5  | 3159 | 3173 | HLA-DRB1*01:01            | Dengue virus 4 | ELISPOT | IFNg release | Positive     |
| 866633  | ESCVVNMKGREKKL    | NS5  | 2935 | 2949 | HLA-DRB5*01:01            | Dengue virus 4 | ELISPOT | IFNg release | Positive     |
| 867070  | HKIFMKDGRSLVPC    | NS5  | 3202 | 3216 | HLA-DRB3*02:02            | Dengue virus 4 | ELISPOT | IFNg release | Positive     |
| 867315  | ISKVRSNAAGAVFQ    | NS5  | 2887 | 2901 | HLA-DRB3*02:02            | Dengue virus 4 | ELISPOT | IFNg release | Positive     |
| 867411  | KILAKAIFKLTYYQNK  | NS5  | 3049 | 3063 | HLA-DRB1*04:02            | Dengue virus 4 | ELISPOT | IFNg release | Positive     |
| 867473  | KPLDERFGTSLFLFN   | NS5  | 3156 | 3170 | HLA-DRB1*01:01            | Dengue virus 4 | ELISPOT | IFNg release | Positive     |
| 867575  | LDERFGTSLFLFNDM   | NS5  | 3158 | 3172 | HLA-DRB1*04:01            | Dengue virus 4 | ELISPOT | IFNg release | Positive     |



|        |                |     |      |      |                           |                |         |              |          |
|--------|----------------|-----|------|------|---------------------------|----------------|---------|--------------|----------|
| 868638 | RDRLASMAICSAVP | NS5 | 3258 | 3272 | HLA-DQA1*01:02/DQB1*06:02 | Dengue virus 4 | ELISPOT | IFNg release | Positive |
|--------|----------------|-----|------|------|---------------------------|----------------|---------|--------------|----------|



# CD8 DENV-1 Epitopes

| Epitope_ID | AminoAcid_Seq     | Protein_Name | Start | End  | Allele      | Serotype       | Method/Technique | Assay Group  | Qualitative Measure   |
|------------|-------------------|--------------|-------|------|-------------|----------------|------------------|--------------|-----------------------|
| 150255     | GPMKLVMAFI        | C            | 43    | 52   | HLA-B*07:02 | Dengue virus 1 | ELISPOT          | IFNg release | Positive              |
| 180637     | MAFIAFLRF         | C            | 48    | 56   | HLA-B*35:01 | Dengue virus 1 | ELISPOT          | IFNg release | Positive              |
| 183175     | FIAFLRFLA         | C            | 50    | 58   | HLA-A*68:02 | Dengue virus 1 | ELISPOT          | IFNg release | Positive              |
| 183220     | FNMLKRARNR        | C            | 14    | 23   | HLA-A*33:01 | Dengue virus 1 | ELISPOT          | IFNg release | Positive              |
| 183800     | IMNRRKRVS         | C            | 94    | 102  | HLA-B*08:01 | Dengue virus 1 | ELISPOT          | IFNg release | Positive              |
| 184003     | KEISSMLNIM        | C            | 86    | 95   | HLA-B*40:01 | Dengue virus 1 | ELISPOT          | IFNg release | Positive              |
| 184458     | LLMLLPTAL         | C            | 83    | 91   | HLA-B*08:01 | Dengue virus 1 | ELISPOT          | IFNg release | Positive              |
| 184835     | MKLVMAFI          | C            | 44    | 53   | HLA-B*35:01 | Dengue virus 1 | ELISPOT          | IFNg release | Positive              |
| 184844     | MLKRERNRV         | C            | 15    | 23   | HLA-B*08:01 | Dengue virus 1 | ELISPOT          | IFNg release | Positive              |
| 184880     | MNRRKRVS          | C            | 95    | 103  | HLA-B*08:01 | Dengue virus 1 | ELISPOT          | IFNg release | Positive              |
| 185102     | NRRKRVS           | C            | 96    | 104  | HLA-B*08:01 | Dengue virus 1 | ELISPOT          | IFNg release | Positive              |
| 185492     | RRKRVS            | C            | 97    | 106  | HLA-B*08:01 | Dengue virus 1 | ELISPOT          | IFNg release | Positive              |
| 240082     | MVLALITFL         | C            | 24    | 32   | HLA-A*02:01 | Dengue virus 1 | ELISPOT          | IFNg release | Positive              |
| 150378     | LLMLVTPSM         | PreM         | 271   | 279  | HLA-B*08:01 | Dengue virus 1 | ELISPOT          | IFNg release | Positive              |
| 183596     | HPGFTVIALF        | PreM         | 244   | 253  | HLA-B*35:01 | Dengue virus 1 | ELISPOT          | IFNg release | Positive              |
| 16554      | FLDLPLPWT         | E            | 213   | 221  | HLA-A2      | Dengue virus 1 | ICS              | IFNg release | Positive              |
| 183421     | GLNSRSTSL         | E            | 747   | 755  | HLA-B*08:01 | Dengue virus 1 | ELISPOT          | IFNg release | Positive              |
| 183654     | IAGGMVTLY         | E            | 760   | 768  | HLA-B*35:01 | Dengue virus 1 | ELISPOT          | IFNg release | Positive              |
| 184377     | LGLNSRSTSL        | E            | 746   | 755  | HLA-B*08:01 | Dengue virus 1 | ELISPOT          | IFNg release | Positive              |
| 184626     | LTDYGALT          | E            | 456   | 464  | HLA-A*01:01 | Dengue virus 1 | ELISPOT          | IFNg release | Positive              |
| 185212     | PTSEIQLTDY        | E            | 449   | 458  | HLA-A*01:01 | Dengue virus 1 | ELISPOT          | IFNg release | Positive              |
| 185893     | TEVTNP            | E            | 329   | 337  | HLA-B*40:01 | Dengue virus 1 | ELISPOT          | IFNg release | Positive              |
| 186524     | WTMKIGIGIL        | E            | 733   | 742  | HLA-B*08:01 | Dengue virus 1 | ELISPOT          | IFNg release | Positive              |
| 186551     | YENLKYVIV         | E            | 412   | 421  | HLA-B*40:01 | Dengue virus 1 | ELISPOT          | IFNg release | Positive              |
| 419306     | PTLDIELLK         | E            | 319   | 327  | HLA-A*11:01 | Dengue virus 1 | ELISPOT          | IFNg release | Positive              |
| 50596      | QEGAMHTAL         | E            | 536   | 544  | HLA-A*02:01 | Dengue virus 1 | ELISPOT          | IFNg release | Positive              |
| 588005     | RDFVEGLSGATWVDVVL | E            | 289   | 305  | HLA class I | Dengue virus 1 | ICS              | IFNg release | Positive              |
| 590597     | VEGLSGATWVDVLEHG  | E            | 292   | 308  | HLA class I | Dengue virus 1 | ICS              | IFNg release | Positive-Intermediate |
| 150258     | GPWHLGKLEL        | NS1          | 1041  | 1050 | HLA-B*07:02 | Dengue virus 1 | ELISPOT          | IFNg release | Positive              |
| 180836     | YGGPISQHN         | NS1          | 1022  | 1031 | HLA-B*35:01 | Dengue virus 1 | ELISPOT          | IFNg release | Positive              |
| 183619     | HTWTEQYKF         | NS1          | 801   | 809  | HLA-B57     | Dengue virus 1 | 51 chromium      | cytotoxicity | Positive              |
| 60104      | SPKRLSAAI         | NS1          | 813   | 821  | HLA-B*08:01 | Dengue virus 1 | ELISPOT          | IFNg release | Positive              |
| 180641     | MALSI             | NS2a         | 1297  | 1305 | HLA-B*51:01 | Dengue virus 1 | ELISPOT          | IFNg release | Positive              |
| 183245     | FQSHQLWATL        | NS2a         | 1267  | 1276 | HLA-B*15:01 | Dengue virus 1 | ELISPOT          | IFNg release | Positive              |
| 183246     | FRRLTSREVL        | NS2a         | 1220  | 1229 | HLA-B*08:01 | Dengue virus 1 | ELISPOT          | IFNg release | Positive              |
| 183252     | FSLHYAWKTM        | NS2a         | 1286  | 1295 | HLA-B*35:01 | Dengue virus 1 | ELISPOT          | IFNg release | Positive              |
| 184274     | LALMATFKM         | NS2a         | 1202  | 1210 | HLA-B*35:01 | Dengue virus 1 | ELISPOT          | IFNg release | Positive              |
| 184623     | LTDQSHQL          | NS2a         | 1264  | 1272 | HLA-A*01:01 | Dengue virus 1 | ELISPOT          | IFNg release | Positive              |
| 184736     | MAMVL             | NS2a         | 1295  | 1303 | HLA-B*35:01 | Dengue virus 1 | ELISPOT          | IFNg release | Positive              |
| 184856     | MLMTGT            | NS2a         | 1158  | 1167 | HLA-B*35:01 | Dengue virus 1 | ELISPOT          | IFNg release | Positive              |
| 185468     | RPMFAVGLLF        | NS2a         | 1211  | 1220 | HLA-B*35:01 | Dengue virus 1 | ELISPOT          | IFNg release | Positive              |
| 419037     | RPMFAVGLIF        | NS2a         | 1211  | 1220 | HLA-B*35:01 | Dengue virus 1 | ELISPOT          | IFNg release | Positive              |
| 150254     | GPLVAGLL          | NS2b         | 1375  | 1383 | HLA-B*07:02 | Dengue virus 1 | ELISPOT          | IFNg release | Positive              |
| 185651     | SILLSLLK          | NS2b         | 1360  | 1368 | HLA-A*11:01 | Dengue virus 1 | ELISPOT          | IFNg release | Positive              |
| 419005     | LLAVSGVYPM        | NS2b         | 1448  | 1457 | HLA-B*15:01 | Dengue virus 1 | ELISPOT          | IFNg release | Positive              |
| 13346      | EMAEALKGMP        | NS3          | 231   | 245  | HLA class I | Dengue virus 1 | ELISPOT          | IFNg release | Positive              |
| 133501     | AIVREAIKR         | NS3          | 1682  | 1690 | HLA-A*02:01 | Dengue virus 1 | ELISPOT          | IFNg release | Positive              |
| 150169     | DPRLCKPV          | NS3          | 1900  | 1908 | HLA-B*07:02 | Dengue virus 1 | ELISPOT          | IFNg release | Positive              |
| 150341     | KPGTSGSPI         | NS3          | 1606  | 1614 | HLA-B*07:02 | Dengue virus 1 | ELISPOT          | IFNg release | Positive              |
| 150538     | RPRWLDART         | NS3          | 2068  | 2076 | HLA-B*07:02 | Dengue virus 1 | ELISPOT          | IFNg release | Positive              |
| 150556     | RVIDPRRLCK        | NS3          | 1897  | 1906 | HLA-A*03:01 | Dengue virus 1 | ELISPOT          | IFNg release | Positive              |
| 150643     | PEGIIPALF         | NS3          | 1976  | 1985 | HLA-B*35:01 | Dengue virus 1 | ELISPOT          | IFNg release | Positive              |
| 167826     | TSGTYVSAIAQAKASQE | NS3          | 157   | 173  | HLA class I | Dengue virus 1 | ELISPOT          | IFNg release | Positive              |
| 180373     | APTRVVASEM        | NS3          | 1698  | 1707 | HLA class I | Dengue virus 1 | ELISPOT          | IFNg release | Positive              |
| 180408     | DPASIAARGY        | NS3          | 1766  | 1775 | HLA-B*35:01 | Dengue virus 1 | ELISPOT          | IFNg release | Positive              |
| 180423     | EERDIPERSW        | NS3          | 1811  | 1820 | HLA-B*44:02 | Dengue virus 1 | ELISPOT          | IFNg release | Positive              |
| 180472     | GEARKTFVEL        | NS3          | 2003  | 2012 | HLA-B*40:01 | Dengue virus 1 | ELISPOT          | IFNg release | Positive              |
| 180670     | MPVTVASAAQ        | NS3          | 1923  | 1932 | HLA-B*35:01 | Dengue virus 1 | ELISPOT          | IFNg release | Positive              |
| 180682     | NPEIEDDIF         | NS3          | 1650  | 1658 | HLA-B*35:01 | Dengue virus 1 | ELISPOT          | IFNg release | Positive              |
| 180804     | VPNNYMIIM         | NS3          | 1751  | 1759 | HLA-B*51:01 | Dengue virus 1 | ELISPOT          | IFNg release | Positive              |
| 182519     | AIKRKLRTL         | NS3          | 1687  | 1695 | HLA-B*08:01 | Dengue virus 1 | ELISPOT          | IFNg release | Positive              |
| 182772     | DISEMGANF         | NS3          | 1885  | 1893 | HLA-A*26:01 | Dengue virus 1 | ELISPOT          | IFNg release | Positive              |
| 183223     | FPGKTVWFVP        | NS3          | 1830  | 1839 | HLA-B*35:01 | Dengue virus 1 | ELISPOT          | IFNg release | Positive              |
| 183229     | FPQSNV            | NS3          | 1801  | 1810 | HLA-B*35:01 | Dengue virus 1 | ELISPOT          | IFNg release | Positive              |
| 183598     | HPGSGKTRRY        | NS3          | 1670  | 1679 | HLA-B*35:01 | Dengue virus 1 | ELISPOT          | IFNg release | Positive              |
| 183929     | IYRILQRGLL        | NS3          | 1497  | 1506 | HLA-B*08:01 | Dengue virus 1 | ELISPOT          | IFNg release | Positive              |
| 184316     | LEENMDVEIW        | NS3          | 2049  | 2058 | HLA-B*44:03 | Dengue virus 1 | ELISPOT          | IFNg release | Positive              |
| 184884     | MPIRYQTAV         | NS3          | 1714  | 1723 | HLA-B*35:01 | Dengue virus 1 | ELISPOT          | IFNg release | Positive              |
| 184896     | MPVTVASAA         | NS3          | 1923  | 1931 | HLA-B*35:01 | Dengue virus 1 | ELISPOT          | IFNg release | Positive              |
| 185124     | NTPEGIIPA         | NS3          | 1975  | 1983 | HLA-A*68:02 | Dengue virus 1 | ELISPOT          | IFNg release | Positive              |
| 185125     | NTPEGIIPAL        | NS3          | 1975  | 1984 | HLA-A*68:02 | Dengue virus 1 | ELISPOT          | IFNg release | Positive              |
| 185327     | QYIMGQPL          | NS3          | 1947  | 1955 | HLA-A*24:02 | Dengue virus 1 | ELISPOT          | IFNg release | Positive              |
| 185741     | SPVRVPNNYM        | NS3          | 1747  | 1756 | HLA-B*35:01 | Dengue virus 1 | ELISPOT          | IFNg release | Positive              |
| 185827     | SYKVASEG          | NS3          | 2023  | 2031 | HLA-A*24:02 | Dengue virus 1 | ELISPOT          | IFNg release | Positive              |
| 186284     | VLDDGIYRI         | NS3          | 1492  | 1500 | HLA-A*02:01 | Dengue virus 1 | ELISPOT          | IFNg release | Positive              |
| 186559     | YKVASEGQY         | NS3          | 2024  | 2033 | HLA-B*35:01 | Dengue virus 1 | ELISPOT          | IFNg release | Positive              |
| 186603     | YSDPLALREF        | NS3          | 2077  | 2086 | HLA-B*35:01 | Dengue virus 1 | ELISPOT          | IFNg release | Positive              |
| 22825      | GTSGSPVNNR        | NS3          | 133   | 142  | HLA-B*57:01 | Dengue virus 1 | 51 chromium      | cytotoxicity | Positive              |
| 32147      | KLRTLVLAPTRV      | NS3          | 216   | 230  | HLA class I | Dengue virus 1 | ELISPOT          | IFNg release | Positive              |



|         |                       |      |      |      |             |                |                   |                     |               |
|---------|-----------------------|------|------|------|-------------|----------------|-------------------|---------------------|---------------|
| 35237   | LDNINTPEGIIPALFEPERE  | NS3  | 496  | 515  | HLA class I | Dengue virus 1 | ELISPOT           | IFNg release        | Positive      |
| 38400   | LPAIVREAI             | NS3  | 1680 | 1688 | HLA-B*53:01 | Dengue virus 1 | ELISPOT           | IFNg release        | Positive      |
| 38766   | LPVWLSYKV             | NS3  | 2018 | 2026 | HLA-B*51:01 | Dengue virus 1 | ELISPOT           | IFNg release        | Positive      |
| 39095   | LRGEARKTFVELMRR       | NS3  | 526  | 540  | HLA class I | Dengue virus 1 | ELISPOT           | IFNg release        | Positive      |
| 419024  | NMIIMDEAHF            | NS3  | 1755 | 1764 | HLA-B*15:01 | Dengue virus 1 | ELISPOT           | IFNg release        | Positive      |
| 419124  | AVEPGKNPK             | NS3  | 1574 | 1582 | HLA-A*11:01 | Dengue virus 1 | ELISPOT           | IFNg release        | Positive      |
| 419125  | AVKSEHTGR             | NS3  | 1722 | 1730 | HLA-A*11:01 | Dengue virus 1 | ELISPOT           | IFNg release        | Positive      |
| 419229  | IYRILQRGL             | NS3  | 1497 | 1505 | HLA-A*24:02 | Dengue virus 1 | ELISPOT           | IFNg release        | Positive      |
| 50894   | QGKRLEPSWASVKKDLISYG  | NS3  | 1536 | 1555 | HLA class I | Dengue virus 1 | ELISPOT           | IFNg release        | Positive      |
| 539170  | DLMCHATF              | NS3  | 1734 | 1741 | HLA-B*08:01 | Dengue virus 1 | ICS               | IFNg release        | Positive      |
| 539663  | MGEAAAFMTATPPGSV      | NS3  | 1782 | 1798 | HLA class I | Dengue virus 1 | ICS               | IFNg release        | Positive      |
| 539750  | NVRTLILAPTRVVASEM     | NS3  | 1690 | 1706 | HLA class I | Dengue virus 1 | ICS               | IFNg release        | Positive      |
| 539753  | NYNMIIMDEAHFTDPA      | NS3  | 1753 | 1768 | HLA class I | Dengue virus 1 | ICS               | IFNg release        | Positive      |
| 56309   | RVIDPRRCL             | NS3  | 1897 | 1905 | HLA-B*07:02 | Dengue virus 1 | ELISPOT           | IFNg release        | Positive      |
| 585710  | LAPTRVASEM            | NS3  | 83   | 93   | HLA class I | Dengue virus 1 | ICS               | IFNg release        | Positive-High |
| 62184   | SVKDKLISYGGGWRF       | NS3  | 71   | 85   | HLA class I | Dengue virus 1 | ELISPOT           | IFNg release        | Positive      |
| 65546   | TPEGIIPAL             | NS3  | 1976 | 1984 | HLA class I | Dengue virus 1 | 51 chromium       | cytotoxicity        | Positive      |
| 65549   | TPEGIIPSM             | NS3  | 1975 | 1983 | HLA-B*53:01 | Dengue virus 1 | 51 chromium       | cytotoxicity        | Positive      |
| 150649  | TPQDNQLAYV            | NS4a | 2222 | 2231 | HLA-B*07:02 | Dengue virus 1 | ELISPOT           | IFNg release        | Positive      |
| 180780  | TPQDNQLAY             | NS4a | 2222 | 2230 | HLA-B*35:01 | Dengue virus 1 | ELISPOT           | IFNg release        | Positive      |
| 182912  | EFFLMVLLI             | NS4a | 2206 | 2214 | HLA-A*24:02 | Dengue virus 1 | ELISPOT           | IFNg release        | Positive      |
| 183162  | FFLMVLLIPE            | NS4a | 2207 | 2216 | HLA-A*33:01 | Dengue virus 1 | ELISPOT           | IFNg release        | Positive      |
| 183813  | IPEPDRQRT             | NS4a | 2214 | 2223 | HLA-B*35:01 | Dengue virus 1 | ELISPOT           | IFNg release        | Positive      |
| 184522  | LPDTIETLM             | NS4a | 2142 | 2150 | HLA-B*35:01 | Dengue virus 1 | ELISPOT           | IFNg release        | Positive      |
| 184523  | LPDTIETLML            | NS4a | 2142 | 2151 | HLA-B*35:01 | Dengue virus 1 | ELISPOT           | IFNg release        | Positive      |
| 184554  | LPQHLTQRAQ            | NS4a | 2107 | 2116 | HLA-B*35:01 | Dengue virus 1 | ELISPOT           | IFNg release        | Positive      |
| 184739  | MASSVLLWM             | NS4a | 2183 | 2191 | HLA-B*35:01 | Dengue virus 1 | ELISPOT           | IFNg release        | Positive      |
| 419128  | AYRHAMEEL             | NS4a | 2134 | 2142 | HLA-A*24:02 | Dengue virus 1 | ELISPOT           | IFNg release        | Positive-High |
| 41986   | MLLALIAVL             | NS4a | 2150 | 2158 | HLA-A2      | Dengue virus 1 | ICS               | IFNg release        | Positive      |
| 133716  | TLYAVATTI             | NS4b | 2284 | 2292 | HLA-A*02:01 | Dengue virus 1 | ELISPOT           | IFNg release        | Positive      |
| 150474  | NPLTLTAAV             | NS4b | 2348 | 2356 | HLA-B*07:02 | Dengue virus 1 | ELISPOT           | IFNg release        | Positive      |
| 150579  | SPGKFWNTTI            | NS4b | 2453 | 2462 | HLA-B*07:02 | Dengue virus 1 | ELISPOT           | IFNg release        | Positive      |
| 180382  | ATGPLTTLV             | NS4b | 2442 | 2450 | HLA-B*58:01 | Dengue virus 1 | ELISPOT           | IFNg release        | Positive      |
| 183594  | HPASAWTLYA            | NS4b | 2278 | 2287 | HLA-B*35:01 | Dengue virus 1 | ELISPOT           | IFNg release        | Positive      |
| 186427  | VYDAKFEK              | NS4b | 2403 | 2411 | HLA-A*11:01 | Dengue virus 1 | ELISPOT           | IFNg release        | Positive      |
| 27180   | ILLMRTTWA             | NS4b | 2426 | 2434 | HLA-A2      | Dengue virus 1 | ICS               | IFNg release        | Positive      |
| 41093   | MANIFRGSY             | NS4b | 2466 | 2474 | HLA-B*35:01 | Dengue virus 1 | ELISPOT           | IFNg release        | Positive      |
| 64286   | TIENTANISLTAIA        | NS4b | 2300 | 2314 | HLA class I | Dengue virus 1 | ELISPOT           | IFNg release        | Positive      |
| 69652   | VLMVLVAHYA            | NS4b | 2356 | 2364 | HLA-A2      | Dengue virus 1 | ICS               | IFNg release        | Positive      |
| 74558   | YLAGAGLAF             | NS4b | 2474 | 2482 | HLA-B*07:02 | Dengue virus 1 | ELISPOT           | IFNg release        | Positive      |
| 1068332 | SSWEDVPYL             | NS5  | 3323 | 3331 | HLA-A*02:01 | Dengue virus 1 | ELISPOT           | IFNg release        | Positive      |
| 133702  | SRNSTHEMY             | NS5  | 2703 | 2711 | HLA-A*02:01 | Dengue virus 1 | ELISPOT           | IFNg release        | Positive      |
| 14325   | ETACLKSY              | NS5  | 3242 | 3250 | HLA-A*26:01 | Dengue virus 1 | ELISPOT           | IFNg release        | Positive      |
| 150308  | IPMATYGWNL            | NS5  | 2607 | 2616 | HLA-B*07:02 | Dengue virus 1 | ELISPOT           | IFNg release        | Positive      |
| 150674  | TVMDISRR              | NS5  | 3080 | 3088 | HLA-A*11:01 | Dengue virus 1 | multimer/tetramer | qualitative binding | Positive      |
| 180376  | ASSMVNGVVR            | NS5  | 2809 | 2818 | HLA-B*57:01 | Dengue virus 1 | ELISPOT           | IFNg release        | Positive      |
| 180411  | DTTPFGQQR             | NS5  | 2837 | 2845 | HLA-A*68:01 | Dengue virus 1 | ELISPOT           | IFNg release        | Positive      |
| 180548  | KAKGSRAIW             | NS5  | 2959 | 2967 | HLA-B*57:01 | Dengue virus 1 | ELISPOT           | IFNg release        | Positive      |
| 180571  | KPRICTREEF            | NS5  | 2882 | 2891 | HLA-B*07:02 | Dengue virus 1 | ELISPOT           | IFNg release        | Positive      |
| 180723  | RLEFEALGF             | NS5  | 2974 | 2983 | HLA-A*23:01 | Dengue virus 1 | ELISPOT           | IFNg release        | Positive      |
| 182554  | ALLATSIFK             | NS5  | 3054 | 3062 | HLA-A*11:01 | Dengue virus 1 | ELISPOT           | IFNg release        | Positive      |
| 182599  | AQMWQLMYF             | NS5  | 3251 | 3259 | HLA-B*15:01 | Dengue virus 1 | ELISPOT           | IFNg release        | Positive      |
| 182836  | DYMTSMKRF             | NS5  | 3373 | 3381 | HLA-A*24:02 | Dengue virus 1 | ELISPOT           | IFNg release        | Positive      |
| 183147  | FCSHHFHL              | NS5  | 3200 | 3208 | HLA-B*08:01 | Dengue virus 1 | ELISPOT           | IFNg release        | Positive      |
| 183275  | FTNMEVQLIR            | NS5  | 3104 | 3113 | HLA-B*35:01 | Dengue virus 1 | ELISPOT           | IFNg release        | Positive      |
| 183828  | IPMVTQIAM             | NS5  | 2827 | 2835 | HLA-B*07:02 | Dengue virus 1 | ELISPOT           | IFNg release        | Positive      |
| 184212  | KVRKDIPQW             | NS5  | 3178 | 3186 | HLA-B*57:01 | Dengue virus 1 | ELISPOT           | IFNg release        | Positive      |
| 184787  | MEVQLVRQM             | NS5  | 3107 | 3115 | HLA-B*40:01 | Dengue virus 1 | ELISPOT           | IFNg release        | Positive      |
| 184849  | MLLNRTTMA             | NS5  | 24   | 32   | HLA-B*08:01 | Dengue virus 1 | ELISPOT           | IFNg release        | Positive      |
| 184898  | MQRKHGGML             | NS5  | 2689 | 2697 | HLA-B*08:01 | Dengue virus 1 | ELISPOT           | IFNg release        | Positive      |
| 184956  | MITEDMLSVW            | NS5  | 3296 | 3305 | HLA-B*58:01 | Dengue virus 1 | ICS               | IFNg release        | Positive      |
| 185279  | QMQRKHGGML            | NS5  | 2688 | 2697 | HLA-B*08:01 | Dengue virus 1 | ELISPOT           | IFNg release        | Positive      |
| 185354  | REIVPCRNRQ            | NS5  | 3214 | 3223 | HLA-B*40:01 | Dengue virus 1 | ELISPOT           | IFNg release        | Positive      |
| 185485  | RQMESEGIFL            | NS5  | 3113 | 3122 | HLA-B*15:01 | Dengue virus 1 | ELISPOT           | IFNg release        | Positive      |
| 186150  | TVMDVISRR             | NS5  | 3080 | 3088 | HLA-A*68:01 | Dengue virus 1 | ELISPOT           | IFNg release        | Positive      |
| 186176  | TWSIAHHQW             | NS5  | 3286 | 3295 | HLA-A*23:01 | Dengue virus 1 | ELISPOT           | IFNg release        | Positive      |
| 186217  | VEDERFWDL             | NS5  | 2918 | 2926 | HLA-B*40:01 | Dengue virus 1 | ELISPOT           | IFNg release        | Positive      |
| 419208  | GVEGEGHLK             | NS5  | 2998 | 3006 | HLA-A*11:01 | Dengue virus 1 | ELISPOT           | IFNg release        | Positive-High |
| 5223    | ATYGNLVVK             | NS5  | 2610 | 2618 | HLA-A*03:01 | Dengue virus 1 | ELISPOT           | IFNg release        | Positive      |
| 539435  | ISGDDCVVKPIDDRFAT     | NS5  | 3152 | 3168 | HLA class I | Dengue virus 1 | ICS               | IFNg release        | Positive      |
| 539702  | MVTQIAMTDTTPFGQQR     | NS5  | 2829 | 2845 | HLA class I | Dengue virus 1 | ICS               | IFNg release        | Positive      |
| 540100  | VVKPIDDRFATALTALN     | NS5  | 3157 | 3173 | HLA class I | Dengue virus 1 | ICS               | IFNg release        | Positive      |
| 62903   | TAKWLWGFLSRNKKPRICR   | NS5  | 2869 | 2888 | HLA class I | Dengue virus 1 | ELISPOT           | IFNg release        | Positive      |
| 65567   | TPFGQQRVF             | NS5  | 2839 | 2847 | HLA class I | Dengue virus 1 | ELISPOT           | IFNg release        | Positive      |
| 67362   | TYGWNLVKL             | NS5  | 2611 | 2619 | HLA-A*24:02 | Dengue virus 1 | ELISPOT           | IFNg release        | Positive      |
| 72563   | WHYDEDNPKYKTWAYHGSYEV | NS5  | 2784 | 2803 | HLA class I | Dengue virus 1 | ELISPOT           | IFNg release        | Positive      |
| 73076   | WSIAHHQW              | NS5  | 3287 | 3295 | HLA-B*57:01 | Dengue virus 1 | ELISPOT           | IFNg release        | Positive      |



# CD8 DENV-2 Epitopes

| Epitope_ID | AminoAcid_Seq      | Protein_Name | Start | End  | Allele      | Serotype       | Method/Technique | Assay Group  | Qualitative Measure |
|------------|--------------------|--------------|-------|------|-------------|----------------|------------------|--------------|---------------------|
| 110018     | VAFRLFLTI          | C            | 51    | 59   | HLA-B*08:01 | Dengue virus 2 | ELISPOT          | IFNg release | Positive            |
| 150252     | GPLKLFMAL          | C            | 42    | 50   | HLA-B*08:01 | Dengue virus 2 | ELISPOT          | IFNg release | Positive            |
| 183766     | ILNRRRTA           | C            | 94    | 102  | HLA-B*08:01 | Dengue virus 2 | ELISPOT          | IFNg release | Positive            |
| 184378     | LGMQLQGRGPL        | C            | 35    | 44   | HLA-B*08:01 | Dengue virus 2 | ELISPOT          | IFNg release | Positive            |
| 184518     | LNRRRTAG           | C            | 95    | 103  | HLA-B*08:01 | Dengue virus 2 | ELISPOT          | IFNg release | Positive            |
| 184643     | LTIPTTAGIL         | C            | 21    | 30   | HLA-B*08:01 | Dengue virus 2 | ELISPOT          | IFNg release | Positive            |
| 185104     | NRRRTAGV           | C            | 96    | 104  | HLA-B*08:01 | Dengue virus 2 | ELISPOT          | IFNg release | Positive            |
| 185399     | RKKARSTPF          | C            | 5     | 13   | HLA-B*08:01 | Dengue virus 2 | ELISPOT          | IFNg release | Positive            |
| 186354     | VQQLTKRFSL         | C            | 26    | 35   | HLA-B*08:01 | Dengue virus 2 | ELISPOT          | IFNg release | Positive            |
| 150224     | FTIMAAILAY         | PreM         | 247   | 256  | HLA-B*35:01 | Dengue virus 2 | ELISPOT          | IFNg release | Positive            |
| 150299     | ILLTAVAPSM         | PreM         | 270   | 279  | HLA-B*08:01 | Dengue virus 2 | ELISPOT          | IFNg release | Positive            |
| 150571     | SLLFKTEDGV         | PreM         | 136   | 145  | HLA-A*02:01 | Dengue virus 2 | ELISPOT          | IFNg release | Positive            |
| 150634     | TLMAMDLGEL         | PreM         | 149   | 158  | HLA-A*02:01 | Dengue virus 2 | ELISPOT          | IFNg release | Positive            |
| 180588     | LAYTIGTTTHF        | PreM         | 254   | 263  | HLA-B*35:01 | Dengue virus 2 | ELISPOT          | IFNg release | Positive            |
| 180818     | WILRHHPGFTMMAAIL   | PreM         | 126   | 140  | HLA class I | Dengue virus 2 | ICS              | IFNg release | Positive            |
| 183577     | HFQRALIFIL         | PreM         | 262   | 271  | HLA-B*08:01 | Dengue virus 2 | ELISPOT          | IFNg release | Positive            |
| 183621     | HVQRIETWIL         | PreM         | 233   | 242  | HLA-B*08:01 | Dengue virus 2 | ELISPOT          | IFNg release | Positive            |
| 186264     | VGRQEKKGSL         | PreM         | 128   | 137  | HLA-B*08:01 | Dengue virus 2 | ELISPOT          | IFNg release | Positive            |
| 150115     | AIYGAAFSGV         | E            | 722   | 731  | HLA-A*02:01 | Dengue virus 2 | ELISPOT          | IFNg release | Positive            |
| 150319     | ITEAELTGY          | E            | 450   | 458  | HLA-A*01:01 | Dengue virus 2 | ELISPOT          | IFNg release | Positive            |
| 150399     | LQMENKAWLV         | E            | 231   | 240  | HLA-B*08:01 | Dengue virus 2 | ELISPOT          | IFNg release | Positive            |
| 150456     | MSYSMCTGKF         | E            | 577   | 586  | HLA-B*35:01 | Dengue virus 2 | ELISPOT          | IFNg release | Positive            |
| 150529     | RLITVNPVIL         | E            | 630   | 638  | HLA-A*02:01 | Dengue virus 2 | ELISPOT          | IFNg release | Positive            |
| 150531     | RLRMDKLQL          | E            | 566   | 574  | HLA-B*08:01 | Dengue virus 2 | ELISPOT          | IFNg release | Positive            |
| 150578     | SPCKIPFEIM         | E            | 611   | 620  | HLA-B*35:01 | Dengue virus 2 | ELISPOT          | IFNg release | Positive            |
| 150725     | WLVHRQWFL          | E            | 486   | 494  | HLA-B*08:01 | Dengue virus 2 | ELISPOT          | IFNg release | Positive            |
| 16553      | FDLPLPLWL          | E            | 213   | 221  | HLA-A2      | Dengue virus 2 | ICS              | TNF release  | Positive            |
| 180433     | EPGQLKLNWF         | E            | 663   | 672  | HLA-B*35:01 | Dengue virus 2 | ELISPOT          | IFNg release | Positive            |
| 180453     | FGAIYGAAF          | E            | 720   | 728  | HLA-B*35:01 | Dengue virus 2 | ELISPOT          | IFNg release | Positive            |
| 180528     | IPFEIMDLEK         | E            | 615   | 624  | HLA-B*35:01 | Dengue virus 2 | ELISPOT          | IFNg release | Positive            |
| 180563     | KILIGVITWIGMNS     | E            | 456   | 470  | HLA class I | Dengue virus 2 | ICS              | IFNg release | Positive            |
| 180618     | LPLPWLPGAD         | E            | 496   | 505  | HLA-B*35:01 | Dengue virus 2 | ELISPOT          | IFNg release | Positive            |
| 180726     | RMAILGDTAWDFGSL    | E            | 691   | 705  | HLA-B7      | Dengue virus 2 | ICS              | IFNg release | Positive            |
| 180816     | WNGNGCLFGKGGIVT    | E            | 381   | 395  | HLA class I | Dengue virus 2 | ICS              | IFNg release | Positive            |
| 182846     | EAKQPATLR          | E            | 329   | 337  | HLA-A*68:01 | Dengue virus 2 | ELISPOT          | IFNg release | Positive            |
| 183310     | GAAFSGVSW          | E            | 725   | 733  | HLA-B*58:01 | Dengue virus 2 | ELISPOT          | IFNg release | Positive            |
| 183437     | GMNSRSTSL          | E            | 747   | 755  | HLA-B*08:01 | Dengue virus 2 | ELISPOT          | IFNg release | Positive            |
| 183708     | IGMNSRSTSL         | E            | 746   | 755  | HLA-B*08:01 | Dengue virus 2 | ELISPOT          | IFNg release | Positive            |
| 183747     | ILIGVIITW          | E            | 737   | 745  | HLA-B*58:01 | Dengue virus 2 | ELISPOT          | IFNg release | Positive            |
| 183748     | ILIGVVITW          | E            | 737   | 745  | HLA-B*58:01 | Dengue virus 2 | ELISPOT          | IFNg release | Positive            |
| 183781     | IMDLEKRHVL         | E            | 619   | 628  | HLA-B*08:01 | Dengue virus 2 | ELISPOT          | IFNg release | Positive            |
| 183840     | IQKETLVTF          | E            | 512   | 520  | HLA-B*15:01 | Dengue virus 2 | ELISPOT          | IFNg release | Positive            |
| 183841     | IQMSSGNLLF         | E            | 550   | 559  | HLA-A*23:01 | Dengue virus 2 | ELISPOT          | IFNg release | Positive            |
| 184300     | LATLRKYCI          | E            | 53    | 61   | HLA-B*08:01 | Dengue virus 2 | ELISPOT          | IFNg release | Positive            |
| 184337     | LEKRHVLGRL         | E            | 622   | 631  | HLA-B*08:01 | Dengue virus 2 | ELISPOT          | IFNg release | Positive            |
| 184467     | LLQMEDKAWL         | E            | 478   | 487  | HLA-B*08:01 | Dengue virus 2 | ELISPOT          | IFNg release | Positive            |
| 184571     | LQLKGMSYSM         | E            | 572   | 581  | HLA-B*08:01 | Dengue virus 2 | ELISPOT          | IFNg release | Positive            |
| 184755     | MDLEKRHVL          | E            | 620   | 628  | HLA-B*08:01 | Dengue virus 2 | ELISPOT          | IFNg release | Positive            |
| 184899     | MRGAKRMAI          | E            | 686   | 694  | HLA-B*08:01 | Dengue virus 2 | ELISPOT          | IFNg release | Positive            |
| 184900     | MRGAKRMAIL         | E            | 686   | 695  | HLA-B*08:01 | Dengue virus 2 | ELISPOT          | IFNg release | Positive            |
| 184920     | MSSGNLLFTG         | E            | 552   | 561  | HLA-B*58:01 | Dengue virus 2 | ELISPOT          | IFNg release | Positive            |
| 185758     | SRSTSLSVSL         | E            | 750   | 759  | HLA-B*08:01 | Dengue virus 2 | ELISPOT          | IFNg release | Positive            |
| 185831     | SYSMCTGKF          | E            | 578   | 586  | HLA-A*23:01 | Dengue virus 2 | ELISPOT          | IFNg release | Positive            |
| 27061      | ILGDTAWDFG         | E            | 96    | 105  | HLA class I | Dengue virus 2 | ELISPOT          | IFNg release | Positive            |
| 41407      | MENKAWLVHRQWFLD    | E            | 201   | 215  | HLA-B*37:01 | Dengue virus 2 | ICS              | IFNg release | Positive            |
| 51388      | QLKGMSYSM          | E            | 573   | 581  | HLA-B*08:01 | Dengue virus 2 | ELISPOT          | IFNg release | Positive            |
| 583702     | GVSGGSWVDIVLEHGSCV | E            | 14    | 31   | HLA class I | Dengue virus 2 | ICS              | IFNg release | Positive-Low        |
| 150259     | GPWHLGKLEM         | NS1          | 1041  | 1050 | HLA-B*35:01 | Dengue virus 2 | ELISPOT          | IFNg release | Positive            |
| 180450     | FAGPVSQHNY         | NS1          | 1022  | 1031 | HLA-B*35:01 | Dengue virus 2 | ELISPOT          | IFNg release | Positive            |
| 180496     | GVFTTNIWLLKLEKEQ   | NS1          | 936   | 950  | HLA class I | Dengue virus 2 | ICS              | IFNg release | Positive            |
| 180689     | NRAVHADMGYWIESA    | NS1          | 966   | 980  | HLA class I | Dengue virus 2 | ICS              | IFNg release | Positive            |
| 182938     | KEENLVNSL          | NS1          | 1115  | 1124 | HLA-B*08:01 | Dengue virus 2 | ELISPOT          | IFNg release | Positive            |
| 184512     | LMWKQITPEL         | NS1          | 841   | 850  | HLA-B*08:01 | Dengue virus 2 | ELISPOT          | IFNg release | Positive            |
| 185342     | RAVHADMGY          | NS1          | 192   | 200  | HLA-B*58:01 | Dengue virus 2 | ELISPOT          | IFNg release | Positive            |
| 185465     | RPLKEKEENL         | NS1          | 1111  | 1120 | HLA-B*08:01 | Dengue virus 2 | ELISPOT          | IFNg release | Positive            |
| 186474     | WKTWGGAKKML        | NS1          | 890   | 899  | HLA-B*08:01 | Dengue virus 2 | ELISPOT          | IFNg release | Positive            |
| 19225      | GEDGCWYGM          | NS1          | 1100  | 1108 | HLA-B*40:01 | Dengue virus 2 | ELISPOT          | IFNg release | Positive            |
| 150206     | FLEMLRTRV          | NS2a         | 1131  | 1140 | HLA-A*02:01 | Dengue virus 2 | ELISPOT          | IFNg release | Positive            |
| 150300     | ILLVAVSFV          | NS2a         | 1146  | 1154 | HLA-A*02:01 | Dengue virus 2 | ELISPOT          | IFNg release | Positive            |
| 150391     | LMMTTIGIVL         | NS2a         | 1228  | 1237 | HLA-B*08:01 | Dengue virus 2 | ELISPOT          | IFNg release | Positive            |
| 150415     | LTDALALGM          | NS2a         | 1250  | 1258 | HLA-A*01:01 | Dengue virus 2 | ELISPOT          | IFNg release | Positive            |
| 150448     | MMATIGIAL          | NS2a         | 1229  | 1237 | HLA-B*35:01 | Dengue virus 2 | ELISPOT          | IFNg release | Positive            |
| 150449     | MMATIGIAL          | NS2a         | 1229  | 1238 | HLA-A*02:01 | Dengue virus 2 | ELISPOT          | IFNg release | Positive            |
| 150457     | MTDDIGMGV          | NS2a         | 1191  | 1199 | HLA-A*01:01 | Dengue virus 2 | ELISPOT          | IFNg release | Positive            |
| 150540     | RPTFAAGLLL         | NS2a         | 1211  | 1220 | HLA-B*07:02 | Dengue virus 2 | ELISPOT          | IFNg release | Positive            |
| 150640     | TMTDDIGMGV         | NS2a         | 1176  | 1185 | HLA-A*02:01 | Dengue virus 2 | ELISPOT          | IFNg release | Positive            |
| 150741     | YQLAVTIMA          | NS2a         | 1157  | 1165 | HLA-A*02:01 | Dengue virus 2 | ELISPOT          | IFNg release | Positive            |
| 180671     | MSFRDLGRVM         | NS2a         | 1175  | 1184 | HLA-B*35:01 | Dengue virus 2 | ELISPOT          | IFNg release | Positive            |



|        |                  |      |      |      |             |                |                   |                     |              |
|--------|------------------|------|------|------|-------------|----------------|-------------------|---------------------|--------------|
| 180717 | RDLGRVMVMVGATMT  | NS2a | 51   | 65   | HLA class I | Dengue virus 2 | ICS               | IFNg release        | Positive     |
| 180735 | RVGTHKAILLVAVSF  | NS2a | 1153 | 1167 | HLA class I | Dengue virus 2 | ICS               | IFNg release        | Positive     |
| 183741 | ILCVPNAVIL       | NS2a | 1279 | 1288 | HLA-B*08:01 | Dengue virus 2 | ELISPOT           | IFNg release        | Positive     |
| 183825 | IPLALTIKGL       | NS2a | 1319 | 1328 | HLA-B*08:01 | Dengue virus 2 | ELISPOT           | IFNg release        | Positive     |
| 184864 | MLRTRVGTK        | NS2a | 1149 | 1157 | HLA-B*08:01 | Dengue virus 2 | ELISPOT           | IFNg release        | Positive     |
| 186041 | TRVGTKHAIL       | NS2a | 1152 | 1161 | HLA-B*08:01 | Dengue virus 2 | ELISPOT           | IFNg release        | Positive     |
| 150101 | AAAWYLWEV        | NS2b | 1463 | 1471 | HLA-A*02:01 | Dengue virus 2 | ELISPOT           | IFNg release        | Positive     |
| 150243 | GLLTVCYVL        | NS2b | 1381 | 1389 | HLA-A*02:01 | Dengue virus 2 | ELISPOT           | IFNg release        | Positive     |
| 150304 | IMAVGMVSI        | NS2b | 1353 | 1361 | HLA-A*02:01 | Dengue virus 2 | ELISPOT           | IFNg release        | Positive     |
| 150381 | LLVISGLFPV       | NS2b | 1448 | 1457 | HLA-A*02:01 | Dengue virus 2 | ELISPOT           | IFNg release        | Positive     |
| 150425 | LVISGLFPV        | NS2b | 1449 | 1457 | HLA-A*02:01 | Dengue virus 2 | ELISPOT           | IFNg release        | Positive     |
| 150584 | SPILSITISE       | NS2b | 1416 | 1425 | HLA-B*35:01 | Dengue virus 2 | ELISPOT           | IFNg release        | Positive     |
| 150610 | TAAAWYLWEV       | NS2b | 117  | 126  | HLA-A*02:01 | Dengue virus 2 | ELISPOT           | IFNg release        | Positive     |
| 180529 | IPITAAAWY        | NS2b | 1459 | 1467 | HLA-B*35:01 | Dengue virus 2 | ELISPOT           | IFNg release        | Positive     |
| 180531 | IPMTGPLVAG       | NS2b | 1371 | 1380 | HLA-B*35:01 | Dengue virus 2 | ELISPOT           | IFNg release        | Positive     |
| 180538 | ISGLFPVSIPITAAA  | NS2b | 106  | 120  | HLA class I | Dengue virus 2 | ICS               | IFNg release        | Positive     |
| 180646 | MAVGMVSIL        | NS2b | 1354 | 1362 | HLA-B*35:01 | Dengue virus 2 | ELISPOT           | IFNg release        | Positive     |
| 183779 | IMAVGMVSIL       | NS2b | 1353 | 1362 | HLA-B*08:01 | Dengue virus 2 | ELISPOT           | IFNg release        | Positive     |
| 183819 | IPITAAAWYL       | NS2b | 1459 | 1468 | HLA-B*08:01 | Dengue virus 2 | ELISPOT           | IFNg release        | Positive     |
| 10643  | DVKKDLISY        | NS3  | 71   | 79   | HLA-B62     | Dengue virus 2 | 51 chromium       | cytotoxicity        | Positive     |
| 11063  | EAHFTDPASIAARGY  | NS3  | 285  | 299  | HLA class I | Dengue virus 2 | ELISPOT           | IFNg release        | Positive     |
| 11125  | EALRGLPIR        | NS3  | 233  | 241  | HLA class I | Dengue virus 2 | ELISPOT           | IFNg release        | Positive     |
| 124391 | KTFVDLMRR        | NS3  | 2006 | 2014 | HLA-A*11:01 | Dengue virus 2 | ELISPOT           | IFNg release        | Positive     |
| 13358  | EMEEALRGLPIRYQT  | NS3  | 230  | 244  | HLA class I | Dengue virus 2 | ELISPOT           | IFNg release        | Positive     |
| 136890 | TPPGSRDPF        | NS3  | 1792 | 1800 | HLA-B*35:01 | Dengue virus 2 | ELISPOT           | IFNg release        | Positive     |
| 150137 | APTRVVAEM        | NS3  | 222  | 231  | HLA-B7      | Dengue virus 2 | multimer/tetramer | qualitative binding | Positive     |
| 150167 | DLMRRGDLVP       | NS3  | 2010 | 2019 | HLA-A*02:01 | Dengue virus 2 | ELISPOT           | IFNg release        | Positive     |
| 150217 | FPQSNAPIM        | NS3  | 1800 | 1808 | HLA-B*35:01 | Dengue virus 2 | ELISPOT           | IFNg release        | Positive     |
| 150346 | KTFDSVYK         | NS3  | 1863 | 1871 | HLA-A*11:01 | Dengue virus 2 | multimer/tetramer | qualitative binding | Positive     |
| 150450 | MPVTHSSAA        | NS3  | 1922 | 1930 | HLA-B*08:01 | Dengue virus 2 | ELISPOT           | IFNg release        | Positive     |
| 150451 | MPVTHSSAAQ       | NS3  | 1922 | 1931 | HLA-B*35:01 | Dengue virus 2 | ELISPOT           | IFNg release        | Positive     |
| 150526 | RIYSDPLALK       | NS3  | 2074 | 2083 | HLA-A*11:01 | Dengue virus 2 | ELISPOT           | IFNg release        | Positive     |
| 150595 | SQIGAGVYK        | NS3  | 1509 | 1517 | HLA-A*11:01 | Dengue virus 2 | ELISPOT           | IFNg release        | Positive     |
| 150644 | TPEGIIPSMF       | NS3  | 1975 | 1984 | HLA-B*53:01 | Dengue virus 2 | ELISPOT           | IFNg release        | Positive     |
| 150693 | VPNYNLIIM        | NS3  | 1750 | 1758 | HLA-B*07:02 | Dengue virus 2 | ELISPOT           | IFNg release        | Positive     |
| 150740 | YLPAlVREA        | NS3  | 1678 | 1686 | HLA-A*02:01 | Dengue virus 2 | ELISPOT           | IFNg release        | Positive     |
| 17802  | FSPGTSGPSIIDKKG  | NS3  | 130  | 144  | HLA class I | Dengue virus 2 | ELISPOT           | IFNg release        | Positive     |
| 180360 | AAEGINVADRRWCDF  | NS3  | 2026 | 2040 | HLA-A24     | Dengue virus 2 | ELISPOT           | IFNg release        | Positive     |
| 180407 | DNINTPEGIIPSMFE  | NS3  | 496  | 510  | HLA-B35     | Dengue virus 2 | ELISPOT           | IFNg release        | Positive     |
| 180428 | EGEWKEGEEVQLAL   | NS3  | 1561 | 1575 | HLA class I | Dengue virus 2 | ICS               | IFNg release        | Positive     |
| 180440 | EREIPERSWNSGHEW  | NS3  | 336  | 350  | HLA-B*57:01 | Dengue virus 2 | ELISPOT           | IFNg release        | Positive     |
| 180460 | FPQSNAPIMD       | NS3  | 1800 | 1809 | HLA-B*35:01 | Dengue virus 2 | ELISPOT           | IFNg release        | Positive     |
| 180471 | GEARKTFVDL       | NS3  | 2002 | 2011 | HLA-B*40:01 | Dengue virus 2 | ELISPOT           | IFNg release        | Positive     |
| 180503 | HPGAGKTKRY       | NS3  | 1669 | 1678 | HLA-B*35:01 | Dengue virus 2 | ELISPOT           | IFNg release        | Positive     |
| 180507 | HTGREIVDLMCHATF  | NS3  | 1726 | 1740 | HLA class I | Dengue virus 2 | ELISPOT           | IFNg release        | Positive     |
| 180575 | KRYLPAIVREAIKRG  | NS3  | 201  | 215  | HLA-A*31:01 | Dengue virus 2 | ELISPOT           | IFNg release        | Positive     |
| 180589 | LDARISYDPLALKEF  | NS3  | 596  | 610  | HLA class I | Dengue virus 2 | ELISPOT           | IFNg release        | Positive     |
| 180605 | LMCHATFTM        | NS3  | 1734 | 1742 | HLA-B*15:01 | Dengue virus 2 | ELISPOT           | IFNg release        | Positive     |
| 180611 | LMRRGDLVPVWLAYRV | NS3  | 2011 | 2025 | HLA-B*55:02 | Dengue virus 2 | ICS               | IFNg release        | Positive     |
| 180617 | LPIRYQTPAI       | NS3  | 1713 | 1722 | HLA-B*35:01 | Dengue virus 2 | ELISPOT           | IFNg release        | Positive     |
| 180623 | LPVWLAYKV        | NS3  | 2017 | 2025 | HLA-B*51:01 | Dengue virus 2 | ELISPOT           | IFNg release        | Positive     |
| 180624 | LPVWLAYKVA       | NS3  | 2017 | 2026 | HLA-B*35:01 | Dengue virus 2 | ELISPOT           | IFNg release        | Positive     |
| 180625 | LPVWLAYRV        | NS3  | 2017 | 2025 | HLA-B*51:01 | Dengue virus 2 | ELISPOT           | IFNg release        | Positive     |
| 180626 | LPVWLAYRVA       | NS3  | 2017 | 2026 | HLA-B*51:01 | Dengue virus 2 | ELISPOT           | IFNg release        | Positive     |
| 180647 | MEEALRGLPIRYQTP  | NS3  | 1706 | 1720 | HLA class I | Dengue virus 2 | ELISPOT           | IFNg release        | Positive     |
| 180724 | RGEARKTFVDLMRRG  | NS3  | 2001 | 2015 | HLA class I | Dengue virus 2 | ELISPOT           | IFNg release        | Positive     |
| 180734 | RSWNSGHEW        | NS3  | 342  | 350  | HLA-B*58:01 | Dengue virus 2 | ICS               | IFNg release        | Positive     |
| 180750 | SPGTSGPSIIDKKGK  | NS3  | 131  | 145  | HLA-A*11:01 | Dengue virus 2 | ELISPOT           | IFNg release        | Positive     |
| 180756 | STRVEMGEAAGIFMT  | NS3  | 301  | 315  | HLA-B*40:06 | Dengue virus 2 | ELISPOT           | IFNg release        | Positive-Low |
| 182687 | AYRIKQIGIL       | NS3  | 1497 | 1506 | HLA-B*08:01 | Dengue virus 2 | ELISPOT           | IFNg release        | Positive     |
| 182848 | EARKTFVDL        | NS3  | 2003 | 2011 | HLA-B*08:01 | Dengue virus 2 | ELISPOT           | IFNg release        | Positive     |
| 182892 | EENMEVEIW        | NS3  | 2049 | 2057 | HLA-B*44:02 | Dengue virus 2 | ELISPOT           | IFNg release        | Positive     |
| 182898 | EEREIPERSW       | NS3  | 1810 | 1819 | HLA-B*44:03 | Dengue virus 2 | ELISPOT           | IFNg release        | Positive     |
| 183347 | GERKKLKPRW       | NS3  | 2061 | 2070 | HLA-B*44:03 | Dengue virus 2 | ELISPOT           | IFNg release        | Positive     |
| 183724 | IKRGLRTLIL       | NS3  | 1687 | 1696 | HLA-B*08:01 | Dengue virus 2 | ELISPOT           | IFNg release        | Positive     |
| 184318 | LEENMEVEIW       | NS3  | 2048 | 2057 | HLA-B*44:02 | Dengue virus 2 | ELISPOT           | IFNg release        | Positive     |
| 185200 | PRRCMKPVIL       | NS3  | 1900 | 1909 | HLA-B*08:01 | Dengue virus 2 | ELISPOT           | IFNg release        | Positive     |
| 185388 | RIKQKIGILY       | NS3  | 1499 | 1508 | HLA-B*15:01 | Dengue virus 2 | ELISPOT           | IFNg release        | Positive     |
| 186211 | VDRKGKVVGL       | NS3  | 1615 | 1624 | HLA-B*08:01 | Dengue virus 2 | ELISPOT           | IFNg release        | Positive     |
| 186242 | VEMGEAAGIF       | NS3  | 1779 | 1788 | HLA-B*44:03 | Dengue virus 2 | ELISPOT           | IFNg release        | Positive     |
| 186301 | VLMHRGKRI        | NS3  | 1532 | 1540 | HLA-B*08:01 | Dengue virus 2 | ELISPOT           | IFNg release        | Positive     |
| 22816  | GTSGSPIADK       | NS3  | 1608 | 1617 | HLA-A*11:01 | Dengue virus 2 | multimer/tetramer | qualitative binding | Positive     |
| 22817  | GTSGSPIADKK      | NS3  | 1608 | 1618 | HLA-A11     | Dengue virus 2 | ELISPOT           | IFNg release        | Positive     |
| 22818  | GTSGSPIIDK       | NS3  | 133  | 142  | HLA-A*11:01 | Dengue virus 2 | ELISPOT           | IFNg release        | Positive     |
| 22819  | GTSGSPIIDKK      | NS3  | 133  | 143  | HLA-A11     | Dengue virus 2 | 51 chromium       | cytotoxicity        | Positive     |
| 22823  | GTSGSPIVDK       | NS3  | 133  | 142  | HLA-A11     | Dengue virus 2 | 51 chromium       | cytotoxicity        | Positive     |
| 22824  | GTSGSPIVDK       | NS3  | 1608 | 1617 | HLA-A*11:01 | Dengue virus 2 | 51 chromium       | cytotoxicity        | Positive     |
| 25929  | IEPSWADVKKDLISY  | NS3  | 65   | 79   | HLA class I | Dengue virus 2 | ELISPOT           | IFNg release        | Positive     |
| 26965  | ILAPTRVVAEMEEA   | NS3  | 220  | 234  | HLA class I | Dengue virus 2 | ELISPOT           | IFNg release        | Positive     |
| 27770  | INYADRRWCF       | NS3  | 555  | 564  | HLA-A24     | Dengue virus 2 | ELISPOT           | IFNg release        | Positive     |
| 2859   | ALRGLPIRY        | NS3  | 234  | 242  | HLA-A*03:01 | Dengue virus 2 | 51 chromium       | cytotoxicity        | Positive     |



|        |                    |      |      |      |             |                |                   |                     |              |
|--------|--------------------|------|------|------|-------------|----------------|-------------------|---------------------|--------------|
| 35238  | LDNINTPEGIIPSMF    | NS3  | 495  | 509  | HLA class I | Dengue virus 2 | ELISPOT           | IFNg release        | Positive     |
| 46575  | NYADRKWCF          | NS3  | 2031 | 2039 | HLA-A24     | Dengue virus 2 | 51 chromium       | cytotoxicity        | Positive     |
| 46576  | NYADRRWCF          | NS3  | 556  | 564  | HLA-A24     | Dengue virus 2 | ELISPOT           | IFNg release        | Positive     |
| 539620 | LRTLILAPTRVVAEM    | NS3  | 1691 | 1706 | HLA class I | Dengue virus 2 | ICS               | IFNg release        | Positive     |
| 539751 | NYNLIIMDEAHFTDPA   | NS3  | 1752 | 1767 | HLA class I | Dengue virus 2 | ICS               | IFNg release        | Positive     |
| 539752 | NYNLIIMDEAHFTDPASI | NS3  | 1752 | 1769 | HLA class I | Dengue virus 2 | ICS               | IFNg release        | Positive     |
| 539985 | TLILAPTRVVAEMEEA   | NS3  | 1693 | 1709 | HLA class I | Dengue virus 2 | ICS               | IFNg release        | Positive     |
| 54176  | RIKQKGIL           | NS3  | 1499 | 1506 | HLA-B8      | Dengue virus 2 | ELISPOT           | IFNg release        | Positive     |
| 5542   | AVSLDFSPGTSGSPI    | NS3  | 125  | 139  | HLA class I | Dengue virus 2 | ELISPOT           | IFNg release        | Positive     |
| 56310  | RVIDPRRCMK         | NS3  | 1896 | 1905 | HLA-A*31:01 | Dengue virus 2 | ELISPOT           | IFNg release        | Positive     |
| 57554  | SEMAGNFKA          | NS3  | 1872 | 1880 | HLA-B*44:03 | Dengue virus 2 | ELISPOT           | IFNg release        | Positive     |
| 65548  | TPEGIIPSL          | NS3  | 1975 | 1983 | HLA-B35     | Dengue virus 2 | 51 chromium       | cytotoxicity        | Positive     |
| 65550  | TPEGIIPSMFEPERE    | NS3  | 500  | 514  | HLA class I | Dengue virus 2 | ELISPOT           | IFNg release        | Positive     |
| 67210  | TVWVFVPSIK         | NS3  | 358  | 366  | HLA class I | Dengue virus 2 | ELISPOT           | IFNg release        | Positive     |
| 790    | ADVKKDLISYGGGWK    | NS3  | 70   | 84   | HLA class I | Dengue virus 2 | ELISPOT           | IFNg release        | Positive     |
| 8910   | DKKKGKVVGL         | NS3  | 1616 | 1624 | HLA-B8      | Dengue virus 2 | ELISPOT           | IFNg release        | Positive     |
| 150289 | ILLEFLLIV          | NS4a | 2202 | 2210 | HLA-A*02:01 | Dengue virus 2 | ELISPOT           | IFNg release        | Positive     |
| 150461 | MTQKARNAL          | NS4a | 2110 | 2118 | HLA-B*07:02 | Dengue virus 2 | ELISPOT           | IFNg release        | Positive     |
| 150612 | TAEAGGRAY          | NS4a | 2126 | 2134 | HLA-B*35:01 | Dengue virus 2 | ELISPOT           | IFNg release        | Positive     |
| 150752 | YVVIALLTV          | NS4a | 2229 | 2237 | HLA-A*02:01 | Dengue virus 2 | ELISPOT           | IFNg release        | Positive     |
| 150753 | YVVIALLTVV         | NS4a | 2229 | 2238 | HLA-A*02:01 | Dengue virus 2 | ELISPOT           | IFNg release        | Positive     |
| 180620 | LPTFMTQKAR         | NS4a | 2106 | 2115 | HLA-B*35:01 | Dengue virus 2 | ELISPOT           | IFNg release        | Positive     |
| 180781 | TPQDNQLTY          | NS4a | 2221 | 2229 | HLA-B*35:01 | Dengue virus 2 | ELISPOT           | IFNg release        | Positive     |
| 185447 | RNALDNLAVL         | NS4a | 2115 | 2124 | HLA-B*08:01 | Dengue virus 2 | ELISPOT           | IFNg release        | Positive     |
| 2877   | ALSELPETL          | NS4a | 2137 | 2145 | HLA-A*02:01 | Dengue virus 2 | ELISPOT           | IFNg release        | Positive     |
| 37557  | LLLTLLATV          | NS4a | 56   | 64   | HLA-A2      | Dengue virus 2 | ICS               | IFNg release        | Positive     |
| 51562  | QLTYVVIALL         | NS4a | 2226 | 2235 | HLA-A*08:01 | Dengue virus 2 | ELISPOT           | IFNg release        | Positive     |
| 150147 | ATVLMGLGK          | NS4b | 2315 | 2323 | HLA-A*11:01 | Dengue virus 2 | multimer/tetramer | qualitative binding | Positive     |
| 150373 | LLILCVTQV          | NS4b | 2416 | 2424 | HLA-A*02:01 | Dengue virus 2 | ELISPOT           | IFNg release        | Positive     |
| 150377 | LLLVAHYAI          | NS4b | 2355 | 2363 | HLA-A*02:01 | Dengue virus 2 | ELISPOT           | IFNg release        | Positive     |
| 150387 | LMGLGKGWPL         | NS4b | 2318 | 2327 | HLA-B*02:01 | Dengue virus 2 | ELISPOT           | IFNg release        | Positive     |
| 150389 | LMMRTTWAL          | NS4b | 2425 | 2433 | HLA-B*08:01 | Dengue virus 2 | ELISPOT           | IFNg release        | Positive     |
| 150445 | MLLILCVTQV         | NS4b | 2415 | 2424 | HLA-A*02:01 | Dengue virus 2 | ELISPOT           | IFNg release        | Positive     |
| 150534 | RPASAWTLY          | NS4b | 2276 | 2284 | HLA-B*07:02 | Dengue virus 2 | ELISPOT           | IFNg release        | Positive     |
| 150639 | TLYAVATTFV         | NS4b | 2282 | 2291 | HLA-A*02:01 | Dengue virus 2 | ELISPOT           | IFNg release        | Positive     |
| 150679 | VIDLDPIPY          | NS4b | 2395 | 2403 | HLA-A*01:01 | Dengue virus 2 | ELISPOT           | IFNg release        | Positive     |
| 150686 | VLMMRTTWA          | NS4b | 2424 | 2432 | HLA-B*08:01 | Dengue virus 2 | ELISPOT           | IFNg release        | Positive     |
| 16757  | FLLVAHYAI          | NS4b | 112  | 120  | HLA-A2      | Dengue virus 2 | ICS               | TNF release         | Positive     |
| 180380 | ATGPISLW           | NS4b | 2440 | 2448 | HLA-B*58:01 | Dengue virus 2 | ELISPOT           | IFNg release        | Positive     |
| 180387 | CEALTATGPISTLW     | NS4b | 191  | 205  | HLA class I | Dengue virus 2 | ELISPOT           | IFNg release        | Positive     |
| 180512 | IANQATVLM          | NS4b | 2311 | 2319 | HLA-B*35:01 | Dengue virus 2 | ELISPOT           | IFNg release        | Positive     |
| 180514 | IAVSMANIF          | NS4b | 2460 | 2468 | HLA-B*35:01 | Dengue virus 2 | ELISPOT           | IFNg release        | Positive     |
| 180601 | LILCVTQVLM         | NS4b | 2417 | 2426 | HLA-B*35:01 | Dengue virus 2 | ELISPOT           | IFNg release        | Positive     |
| 180789 | TVIDLPIPYDPKFE     | NS4b | 2394 | 2408 | HLA class I | Dengue virus 2 | ELISPOT           | IFNg release        | Positive     |
| 180794 | VATTFVTPM          | NS4b | 2286 | 2294 | HLA-B*35:01 | Dengue virus 2 | ELISPOT           | IFNg release        | Positive     |
| 180802 | VPLLAIGCY          | NS4b | 2334 | 2342 | HLA-A*35:01 | Dengue virus 2 | ELISPOT           | IFNg release        | Positive     |
| 182747 | CYSQVNPITL         | NS4b | 2341 | 2350 | HLA-A*24:02 | Dengue virus 2 | ELISPOT           | IFNg release        | Positive     |
| 183670 | IENSSVNVSL         | NS4b | 2299 | 2308 | HLA-B*08:01 | Dengue virus 2 | ELISPOT           | IFNg release        | Positive     |
| 184439 | LLILCVTQVL         | NS4b | 2416 | 2425 | HLA-B*08:01 | Dengue virus 2 | ELISPOT           | IFNg release        | Positive     |
| 184814 | MGLGKGWPL          | NS4b | 2319 | 2327 | HLA-B*08:01 | Dengue virus 2 | ELISPOT           | IFNg release        | Positive     |
| 186002 | TPMLRHSIE          | NS4b | 2292 | 2300 | HLA-B*08:01 | Dengue virus 2 | ELISPOT           | IFNg release        | Positive     |
| 240933 | TPMLRHSI           | NS4b | 2292 | 2299 | HLA-B*07:02 | Dengue virus 2 | ELISPOT           | IFNg release        | Positive     |
| 35568  | LEKTKKDL           | NS4b | 2249 | 2256 | HLA-B8      | Dengue virus 2 | ELISPOT           | IFNg release        | Positive     |
| 10587  | DVFFTPPEK          | NS5  | 2622 | 2630 | HLA class I | Dengue virus 2 | ELISPOT           | IFNg release        | Positive     |
| 150227 | FTMRHKKATY         | NS5  | 2734 | 2743 | HLA-B*35:01 | Dengue virus 2 | ELISPOT           | IFNg release        | Positive     |
| 150309 | IPMSTYGVNWL        | NS5  | 2605 | 2614 | HLA-B*07:02 | Dengue virus 2 | ELISPOT           | IFNg release        | Positive     |
| 150541 | RPTPRGTVM          | NS5  | 3073 | 3081 | HLA-B*07:02 | Dengue virus 2 | ELISPOT           | IFNg release        | Positive     |
| 150554 | RTTWISHAK          | NS5  | 3283 | 3291 | HLA-A*11:01 | Dengue virus 2 | ELISPOT           | IFNg release        | Positive     |
| 150655 | TPRMCTREEF         | NS5  | 2881 | 2890 | HLA-B*35:01 | Dengue virus 2 | ELISPOT           | IFNg release        | Positive     |
| 150698 | VPYLGKREDQ         | NS5  | 3327 | 3336 | HLA-B*07:02 | Dengue virus 2 | ELISPOT           | IFNg release        | Positive     |
| 150750 | YTDYMPMSMK         | NS5  | 3370 | 3378 | HLA-A*01:01 | Dengue virus 2 | ELISPOT           | IFNg release        | Positive     |
| 161186 | RLTKPWVDVPMVTQ     | NS5  | 326  | 340  | HLA-B*55:02 | Dengue virus 2 | ICS               | IFNg release        | Positive     |
| 163027 | NIQTAINQV          | NS5  | 3353 | 3361 | HLA-A*02:01 | Dengue virus 2 | ELISPOT           | IFNg release        | Positive-Low |
| 163620 | TITEEIAVQ          | NS5  | 3127 | 3135 | HLA-A*02:01 | Dengue virus 2 | ELISPOT           | IFNg release        | Positive     |
| 174066 | CGGLKNVREVKGTLKGG  | NS5  | 2582 | 2598 | HLA-A2      | Dengue virus 2 | ICS               | IFNg release        | Positive     |
| 180437 | EPKEGTKKLM         | NS5  | 2856 | 2865 | HLA-B*35:01 | Dengue virus 2 | ELISPOT           | IFNg release        | Positive     |
| 180443 | ETACLGKSYA         | NS5  | 3241 | 3250 | HLA-A*26:01 | Dengue virus 2 | ELISPOT           | IFNg release        | Positive     |
| 180483 | GKKKTPRMCTREEFT    | NS5  | 2877 | 2891 | HLA class I | Dengue virus 2 | ELISPOT           | IFNg release        | Positive     |
| 180488 | GPGEHEPIPM         | NS5  | 2598 | 2607 | HLA-B*35:01 | Dengue virus 2 | ELISPOT           | IFNg release        | Positive     |
| 180500 | HKKLAEAIKLTQYN     | NS5  | 3052 | 3066 | HLA class I | Dengue virus 2 | ELISPOT           | IFNg release        | Positive     |
| 180579 | KSYAQMWSLMYFHRR    | NS5  | 3247 | 3261 | HLA class I | Dengue virus 2 | ELISPOT           | IFNg release        | Positive     |
| 180582 | KTWAYHGSYETKQTG    | NS5  | 2792 | 2806 | HLA class I | Dengue virus 2 | ICS               | IFNg release        | Positive     |
| 180584 | KVRKDIQQW          | NS5  | 3177 | 3185 | HLA-B*57:01 | Dengue virus 2 | ELISPOT           | IFNg release        | Positive     |
| 180606 | LMKITAEWLW         | NS5  | 2864 | 2873 | HLA-B*53:01 | Dengue virus 2 | ELISPOT           | IFNg release        | Positive     |
| 180643 | MAMTDITTFPGQQRVF   | NS5  | 2832 | 2846 | HLA class I | Dengue virus 2 | ELISPOT           | IFNg release        | Positive     |
| 180667 | MPMSKFRRE          | NS5  | 3374 | 3383 | HLA-B*53:01 | Dengue virus 2 | ELISPOT           | IFNg release        | Positive     |
| 180668 | MPSVIEKMET         | NS5  | 2678 | 2687 | HLA-B*53:01 | Dengue virus 2 | ELISPOT           | IFNg release        | Positive     |
| 180675 | MSTYGVNWLVRLOSGV   | NS5  | 2607 | 2621 | HLA class I | Dengue virus 2 | ELISPOT           | IFNg release        | Positive     |
| 180681 | NEEYTDYMPMSMKRFR   | NS5  | 3367 | 3381 | HLA class I | Dengue virus 2 | ELISPOT           | IFNg release        | Positive     |
| 180758 | SWHYDQDHPYKWTWAY   | NS5  | 291  | 305  | HLA class I | Dengue virus 2 | ELISPOT           | IFNg release        | Positive     |
| 180774 | TLRLNLVENWLNNN     | NS5  | 2652 | 2666 | HLA class I | Dengue virus 2 | ELISPOT           | IFNg release        | Positive     |



|        |                   |     |      |      |             |                |             |              |              |
|--------|-------------------|-----|------|------|-------------|----------------|-------------|--------------|--------------|
| 180814 | WAYHGSYET         | NS5 | 2794 | 2802 | HLA-B*35:01 | Dengue virus 2 | ELISPOT     | IFNγ release | Positive     |
| 180817 | WHYDQDHPY         | NS5 | 2783 | 2791 | HLA-B*35:01 | Dengue virus 2 | ELISPOT     | IFNγ release | Positive     |
| 180828 | YAQMWSLMYF        | NS5 | 3249 | 3258 | HLA-B*35:01 | Dengue virus 2 | ELISPOT     | IFNγ release | Positive     |
| 182855 | EAVEDGRFWE        | NS5 | 2915 | 2924 | HLA-B*58:01 | Dengue virus 2 | ELISPOT     | IFNγ release | Positive     |
| 184131 | KREDQWCGSL        | NS5 | 3332 | 3341 | HLA-B*08:01 | Dengue virus 2 | ELISPOT     | IFNγ release | Positive     |
| 184234 | KWKSRNLAL         | NS5 | 2503 | 2511 | HLA-B*08:01 | Dengue virus 2 | ELISPOT     | IFNγ release | Positive     |
| 184373 | LGKKKTIPRM        | NS5 | 2876 | 2884 | HLA-B*08:01 | Dengue virus 2 | ELISPOT     | IFNγ release | Positive     |
| 184840 | MLINRFTMR         | NS5 | 2729 | 2737 | HLA-B*08:01 | Dengue virus 2 | ELISPOT     | IFNγ release | Positive     |
| 184957 | MTTEDMLTVW        | NS5 | 3295 | 3304 | HLA-B*58:01 | Dengue virus 2 | ICS         | IFNγ release | Positive     |
| 185491 | RREEEAGVL         | NS5 | 3381 | 3390 | HLA-B*08:01 | Dengue virus 2 | ELISPOT     | IFNγ release | Positive     |
| 185931 | TKQTGSASSM        | NS5 | 2802 | 2811 | HLA-B*08:01 | Dengue virus 2 | ELISPOT     | IFNγ release | Positive     |
| 186219 | VEDGRFWEL         | NS5 | 2917 | 2925 | HLA-B*40:01 | Dengue virus 2 | ELISPOT     | IFNγ release | Positive     |
| 190862 | MVTQMAMTDTPFGQQR  | NS5 | 2828 | 2844 | HLA class I | Dengue virus 2 | ICS         | IFNγ release | Positive     |
| 31747  | KLAEAIKFL         | NS5 | 3054 | 3062 | HLA-A*02:01 | Dengue virus 2 | ELISPOT     | IFNγ release | Positive-Low |
| 32939  | KPWDIIPMV         | NS5 | 2821 | 2829 | HLA-B*55:02 | Dengue virus 2 | 51 chromium | cytotoxicity | Positive     |
| 32941  | KPWDVLPMPV        | NS5 | 2821 | 2829 | HLA class I | Dengue virus 2 | 51 chromium | cytotoxicity | Positive     |
| 32942  | KPWDVLPTV         | NS5 | 2821 | 2829 | HLA class I | Dengue virus 2 | 51 chromium | cytotoxicity | Positive     |
| 32943  | KPWDVVPMPV        | NS5 | 2821 | 2829 | HLA-B*51:01 | Dengue virus 2 | 51 chromium | cytotoxicity | Positive     |
| 53476  | REDQWCGSL         | NS5 | 3333 | 3341 | HLA-B*40:01 | Dengue virus 2 | ELISPOT     | IFNγ release | Positive     |
| 539144 | CVVKPLDDRFASALTAL | NS5 | 3156 | 3172 | HLA class I | Dengue virus 2 | ICS         | IFNγ release | Positive     |
| 539436 | ISGDDCVVKPLDDRFA  | NS5 | 3151 | 3166 | HLA class I | Dengue virus 2 | ICS         | IFNγ release | Positive     |
| 69671  | VLNPMPSV          | NS5 | 2673 | 2681 | HLA-A*02:01 | Dengue virus 2 | ELISPOT     | IFNγ release | Positive     |
| 73428  | YAQMWSLMY         | NS5 | 3249 | 3257 | HLA-B*15:01 | Dengue virus 2 | ELISPOT     | IFNγ release | Positive     |
| 74305  | YILRDVSKK         | NS5 | 517  | 525  | HLA class I | Dengue virus 2 | ELISPOT     | IFNγ release | Positive     |



# CD8 DENV-3 Epitopes

| Epitope_ID | AminoAcid_Seq   | Protein_Name | Start | End  | Allele      | Serotype       | Method/Technique    | Assay Group   | Qualitative Measure |
|------------|-----------------|--------------|-------|------|-------------|----------------|---------------------|---------------|---------------------|
| 180390     | CLMMMLPATL      | C            | 104   | 113  | HLA-A*02:01 | Dengue virus 3 | ELISPOT             | IFNg release  | Positive            |
| 180577     | KSGAIKVLK       | C            | 74    | 82   | HLA-A*11:01 | Dengue virus 3 | ELISPOT             | IFNg release  | Positive            |
| 180609     | LMMMLPATL       | C            | 105   | 113  | HLA-A*02:01 | Dengue virus 3 | ELISPOT             | IFNg release  | Positive            |
| 184260     | LAIPPTAGVL      | C            | 57    | 66   | HLA-B*08:01 | Dengue virus 3 | ELISPOT             | IFNg release  | Positive            |
| 184264     | LAKRFSRGL       | C            | 29    | 37   | HLA-B*08:01 | Dengue virus 3 | ELISPOT             | IFNg release  | Positive            |
| 184265     | LAKRFSRGLL      | C            | 29    | 38   | HLA-B*08:01 | Dengue virus 3 | ELISPOT             | IFNg release  | Positive            |
| 184845     | MLKRVNRNV       | C            | 15    | 23   | HLA-B*08:01 | Dengue virus 3 | ELISPOT             | IFNg release  | Positive            |
| 185260     | QLAKRFSRG       | C            | 28    | 36   | HLA-B*08:01 | Dengue virus 3 | ELISPOT             | IFNg release  | Positive            |
| 180464     | FTILALFLAH      | PreM         | 247   | 256  | HLA-B*35:01 | Dengue virus 3 | ELISPOT             | IFNg release  | Positive            |
| 180504     | HPGFTILALF      | PreM         | 244   | 253  | HLA-B*35:01 | Dengue virus 3 | ELISPOT             | IFNg release  | Positive            |
| 184658     | LTQKVIFIL       | PreM         | 262   | 271  | HLA-B*08:01 | Dengue virus 3 | ELISPOT             | IFNg release  | Positive            |
| 185685     | SLLFKTASG       | PreM         | 136   | 144  | HLA-B*08:01 | Dengue virus 3 | ELISPOT             | IFNg release  | Positive            |
| 13119      | ELKGMSYAM       | E            | 155   | 163  | HLA-B*08:01 | Dengue virus 3 | ELISPOT             | IFNg release  | Positive            |
| 15796      | FFDLPLPWT       | E            | 211   | 219  | HLA-A2      | Dengue virus 3 | ICS                 | IFNg release  | Positive            |
| 180613     | LPEEQDQNY       | E            | 82    | 90   | HLA-B*35:01 | Dengue virus 3 | ELISPOT             | IFNg release  | Positive            |
| 180657     | MLVTPSMTM       | E            | 273   | 281  | HLA-B*35:01 | Dengue virus 3 | ELISPOT             | IFNg release  | Positive            |
| 183793     | IMKIGIGVLL      | E            | 452   | 461  | HLA-B*08:01 | Dengue virus 3 | ELISPOT             | IFNg release  | Positive            |
| 183843     | IQNSGGTSIF      | E            | 131   | 140  | HLA-B*15:01 | Dengue virus 3 | ELISPOT             | IFNg release  | Positive            |
| 184299     | LATLRKLCI       | E            | 53    | 61   | HLA-B*08:01 | Dengue virus 3 | ELISPOT             | IFNg release  | Positive            |
| 184412     | LKGMSYAMCL      | E            | 156   | 165  | HLA-B*08:01 | Dengue virus 3 | ELISPOT             | IFNg release  | Positive            |
| 184536     | LPEYGLGLE       | E            | 453   | 462  | HLA-B*35:01 | Dengue virus 3 | ELISPOT             | IFNg release  | Positive            |
| 184568     | LPWTSGATT       | E            | 496   | 504  | HLA-B*35:01 | Dengue virus 3 | ELISPOT             | IFNg release  | Positive            |
| 184924     | MSYAMCTNTF      | E            | 575   | 584  | HLA-B*35:01 | Dengue virus 3 | ELISPOT             | IFNg release  | Positive            |
| 184965     | MVHQIFGSAY      | E            | 713   | 722  | HLA-B*15:01 | Dengue virus 3 | ELISPOT             | IFNg release  | Positive            |
| 185419     | RLKMDKLEL       | E            | 148   | 156  | HLA-B*08:01 | Dengue virus 3 | ELISPOT             | IFNg release  | Positive            |
| 186029     | TPTWNRKEL       | E            | 226   | 234  | HLA-B*07:02 | Dengue virus 3 | ELISPOT             | IFNg release  | Positive-Low        |
| 186470     | WIMKIGIGVL      | E            | 451   | 460  | HLA-B*08:01 | Dengue virus 3 | ELISPOT             | IFNg release  | Positive            |
| 589817     | SGATWVDVLEHGCV  | E            | 268   | 283  | HLA class I | Dengue virus 3 | ICS                 | IFNg release  | Positive-High       |
| 150537     | RPGYHTQTA       | NS1          | 1030  | 1038 | HLA-B*07:02 | Dengue virus 3 | ELISPOT             | IFNg release  | Positive            |
| 150546     | RSCTLPLRY       | NS1          | 1087  | 1096 | HLA-A*01:01 | Dengue virus 3 | ELISPOT             | IFNg release  | Positive            |
| 180738     | RYMGEDGCWY      | NS1          | 1095  | 1104 | HLA-A*24:02 | Dengue virus 3 | ELISPOT             | IFNg release  | Positive            |
| 182939     | EKEENMVKSL      | NS1          | 1113  | 1122 | HLA-B*08:01 | Dengue virus 3 | ELISPOT             | IFNg release  | Positive            |
| 183723     | IKLTVVVGDI      | NS1          | 857   | 866  | HLA-B*08:01 | Dengue virus 3 | ELISPOT             | IFNg release  | Positive            |
| 184585     | LRTTIVSGKL      | NS1          | 64    | 73   | HLA-B*08:01 | Dengue virus 3 | ELISPOT             | IFNg release  | Positive            |
| 185464     | RPINEKEENM      | NS1          | 1109  | 1118 | HLA-B*35:01 | Dengue virus 3 | ELISPOT             | IFNg release  | Positive            |
| 185573     | RYMGEDGCW       | NS1          | 1095  | 1103 | HLA-A*24:02 | Dengue virus 3 | ELISPOT             | IFNg release  | Positive            |
| 185734     | SPKRLATAI       | NS1          | 811   | 819  | HLA-B*08:01 | Dengue virus 3 | ELISPOT             | IFNg release  | Positive            |
| 183395     | GKKHMIAGVL      | NS2a         | 1153  | 1162 | HLA-B*08:01 | Dengue virus 3 | ELISPOT             | IFNg release  | Positive            |
| 183587     | HMIAGVFTF       | NS2a         | 368   | 377  | HLA-A*24:02 | Dengue virus 3 | ELISPOT             | IFNg release  | Positive            |
| 184254     | LAILFEEVM       | NS2a         | 1140  | 1148 | HLA-B*35:01 | Dengue virus 3 | ELISPOT             | IFNg release  | Positive            |
| 184819     | MIAGVFTF        | NS2a         | 369   | 377  | HLA-B*35:01 | Dengue virus 3 | ELISPOT             | IFNg release  | Positive            |
| 185978     | TMGVLCILAI      | NS2a         | 1134  | 1143 | HLA-B*08:01 | Dengue virus 3 | ELISPOT             | IFNg release  | Positive            |
| 186175     | TWRDMAHTLI      | NS2a         | 1174  | 1183 | HLA-A*24:02 | Dengue virus 3 | ELISPOT             | IFNg release  | Positive            |
| 180622     | LPVWLAHKVA      | NS3          | 226   | 235  | HLA-B*35:01 | Dengue virus 3 | ELISPOT             | IFNg release  | Positive            |
| 182917     | EKFDAAGR        | NS3          | 2083  | 2091 | HLA-A*33:01 | Dengue virus 3 | ELISPOT             | IFNg release  | Positive            |
| 184065     | KLNDWDFV        | NS3          | 399   | 407  | HLA-A*02:01 | Dengue virus 3 | ELISPOT             | IFNg release  | Positive-High       |
| 186234     | VEIWTKEGK       | NS3          | 2053  | 2062 | HLA-B*40:01 | Dengue virus 3 | ELISPOT             | IFNg release  | Positive            |
| 19434      | GESRKTFFE       | NS3          | 2001  | 2009 | HLA-B7      | Dengue virus 3 | 51 chromium         | cytotoxicity  | Positive            |
| 19435      | GESRKTVEL       | NS3          | 211   | 220  | HLA-B*40:01 | Dengue virus 3 | ICS                 | IFNg release  | Positive            |
| 22820      | GTSGPSIINR      | NS3          | 133   | 142  | HLA-A*11:01 | Dengue virus 3 | 51 chromium         | cytotoxicity  | Positive            |
| 22821      | GTSGPSIINRE     | NS3          | 133   | 143  | HLA-A11     | Dengue virus 3 | ICS                 | IFNg release  | Positive            |
| 3124       | AMKGLPIRY       | NS3          | 1708  | 1716 | HLA-B62     | Dengue virus 3 | 51 chromium         | cytotoxicity  | Positive            |
| 34605      | KYTDKRWCF       | NS3          | 240   | 248  | HLA-A24     | Dengue virus 3 | ELISPOT             | IFNg release  | Positive            |
| 590435     | TRVVAEMEAMKGLPI | NS3          | 1698  | 1714 | HLA class I | Dengue virus 3 | ICS                 | IFNg release  | Positive-Low        |
| 62183      | SVKKDLISY       | NS3          | 71    | 79   | HLA-B62     | Dengue virus 3 | 51 chromium         | cytotoxicity  | Positive            |
| 183165     | FFMMVLLIPE      | NS4a         | 2205  | 2214 | HLA-A*33:01 | Dengue virus 3 | ELISPOT             | IFNg release  | Positive            |
| 37494      | LLGLMILL        | NS4a         | 2148  | 2156 | HLA-A2      | Dengue virus 3 | ICS                 | IFNg release  | Positive            |
| 180381     | ATGPITLW        | NS4b         | 2439  | 2447 | HLA-B*58:01 | Dengue virus 3 | ELISPOT             | IFNg release  | Positive            |
| 180788     | TKRDLGMSK       | NS4b         | 2250  | 2259 | HLA-A*11:01 | Dengue virus 3 | ELISPOT             | IFNg release  | Positive            |
| 183796     | IMKSVGTGK       | NS4b         | 2481  | 2489 | HLA-A*03:01 | Dengue virus 3 | ELISPOT             | IFNg release  | Positive            |
| 37534      | LLLMRTSWA       | NS4b         | 2423  | 2431 | HLA-A2      | Dengue virus 3 | biological activity | proliferation | Positive            |
| 69612      | VLLLVTHYA       | NS4b         | 2353  | 2361 | HLA-A2      | Dengue virus 3 | ICS                 | IFNg release  | Positive            |
| 1067501    | KPIDDRFAN       | NS5          | 3158  | 3166 | HLA-B*07:02 | Dengue virus 3 | ELISPOT             | IFNg release  | Positive            |
| 180572     | KPRLCTREEF      | NS5          | 2879  | 2888 | HLA-B*07:02 | Dengue virus 3 | ELISPOT             | IFNg release  | Positive            |
| 180650     | MEITAEWLW       | NS5          | 2863  | 2871 | HLA-B*58:01 | Dengue virus 3 | ELISPOT             | IFNg release  | Positive            |
| 180678     | MVSRLLLNR       | NS5          | 2723  | 2731 | HLA-A*11:01 | Dengue virus 3 | ELISPOT             | IFNg release  | Positive            |
| 180728     | RPRLCTREEF      | NS5          | 2879  | 2888 | HLA-B*07:02 | Dengue virus 3 | ELISPOT             | IFNg release  | Positive            |
| 180737     | RYLEFEALGF      | NS5          | 2971  | 2980 | HLA-A*24:02 | Dengue virus 3 | ELISPOT             | IFNg release  | Positive            |
| 180801     | VMGITAEWLW      | NS5          | 2862  | 2871 | HLA-B*53:01 | Dengue virus 3 | ELISPOT             | IFNg release  | Positive            |
| 182553     | ALLALNDMGK      | NS5          | 3167  | 3176 | HLA-A*03:01 | Dengue virus 3 | ELISPOT             | IFNg release  | Positive            |
| 185710     | SMINGVVKL       | NS5          | 318   | 326  | HLA-A*02:01 | Dengue virus 3 | ELISPOT             | IFNg release  | Positive            |
| 186127     | TTWEDVPYL       | NS5          | 3321  | 3329 | HLA-A*02:01 | Dengue virus 3 | ELISPOT             | IFNg release  | Positive            |
| 186215     | VEDEDFWKL       | NS5          | 2915  | 2923 | HLA-B*40:01 | Dengue virus 3 | ELISPOT             | IFNg release  | Positive            |



|       |           |     |      |      |             |                |             |              |          |
|-------|-----------|-----|------|------|-------------|----------------|-------------|--------------|----------|
| 32944 | KPWDVVPTV | NS5 | 2819 | 2827 | HLA class I | Dengue virus 3 | 51 chromium | cytotoxicity | Positive |
|-------|-----------|-----|------|------|-------------|----------------|-------------|--------------|----------|



# CD8 DENV-4 Epitopes

| Epitope_ID | AminoAcid_Seq        | Protein_Name | Start | End  | Allele      | Serotype       | Method/Technique | Assay Group  | Qualitative Measure |
|------------|----------------------|--------------|-------|------|-------------|----------------|------------------|--------------|---------------------|
| 180541     | ITLLCLIPTV           | C            | 102   | 111  | HLA-A*02:01 | Dengue virus 4 | ELISPOT          | IFNg release | Positive            |
| 180810     | VTYECPLL             | PreM         | 162   | 170  | HLA-A*02:01 | Dengue virus 4 | ELISPOT          | IFNg release | Positive            |
| 182707     | CNLTSTWVMY           | PreM         | 181   | 190  | HLA-A*30:02 | Dengue virus 4 | ELISPOT          | IFNg release | Positive            |
| 182971     | EMCEDTVTY            | PreM         | 156   | 164  | HLA-B*35:01 | Dengue virus 4 | ELISPOT          | IFNg release | Positive            |
| 186303     | VLMMLVAPSY           | PreM         | 17    | 26   | HLA-B*15:01 | Dengue virus 4 | ELISPOT          | IFNg release | Positive            |
| 185147     | NYKERMVTF            | E            | 511   | 519  | HLA-A*24:02 | Dengue virus 4 | ELISPOT          | IFNg release | Positive            |
| 185817     | SWMIRILIGF           | E            | 161   | 170  | HLA-A*24:02 | Dengue virus 4 | ELISPOT          | IFNg release | Positive            |
| 583701     | GVSGGAWVDLVLEHGGCV   | E            | 14    | 31   | HLA class I | Dengue virus 4 | ICS              | IFNg release | Positive-Low        |
| 183667     | IEKASLIEV            | NS1          | 986   | 994  | HLA-B*40:01 | Dengue virus 4 | ELISPOT          | IFNg release | Positive            |
| 185050     | NFLEVEDYGF           | NS1          | 925   | 934  | HLA-A*24:02 | Dengue virus 4 | ELISPOT          | IFNg release | Positive            |
| 240130     | PPASDLKYSW           | NS1          | 880   | 889  | HLA-B*53:01 | Dengue virus 4 | ELISPOT          | IFNg release | Positive            |
| 167725     | AMTTTSLIPHDLMELIDGIS | NS2a         | 50    | 69   | HLA class I | Dengue virus 4 | ELISPOT          | IFNg release | Positive            |
| 182562     | ALPVYLMTL            | NS2a         | 1329  | 1337 | HLA-A*02:01 | Dengue virus 4 | ELISPOT          | IFNg release | Positive            |
| 183818     | IPHDLMELI            | NS2a         | 1241  | 1249 | HLA-B*53:01 | Dengue virus 4 | ELISPOT          | IFNg release | Positive            |
| 184390     | LIDGISLGL            | NS2a         | 1248  | 1256 | HLA-A*01:01 | Dengue virus 4 | ELISPOT          | IFNg release | Positive            |
| 184566     | LPVYLMTLMK           | NS2a         | 1330  | 1339 | HLA-B*35:01 | Dengue virus 4 | ELISPOT          | IFNg release | Positive            |
| 184591     | LSIPHDLMEF           | NS2a         | 1239  | 1248 | HLA-A*01:01 | Dengue virus 4 | ELISPOT          | IFNg release | Positive            |
| 182901     | EETNMITLL            | NS2b         | 1434  | 1442 | HLA-B*40:01 | Dengue virus 4 | ELISPOT          | IFNg release | Positive            |
| 186584     | YPLAIPVTM            | NS2b         | 1454  | 1462 | HLA-B*53:01 | Dengue virus 4 | ELISPOT          | IFNg release | Positive            |
| 239411     | ALWVYVQVK            | NS2b         | 1463  | 1471 | HLA-A*03:01 | Dengue virus 4 | ELISPOT          | IFNg release | Positive            |
| 418991     | IPVTMALWY            | NS2b         | 1458  | 1466 | HLA-B*35:01 | Dengue virus 4 | ELISPOT          | IFNg release | Positive            |
| 156711     | LAPTRVVAEMEEAL       | NS3          | 1695  | 1709 | HLA-B7      | Dengue virus 4 | 51 chromium      | cytotoxicity | Positive            |
| 180473     | GEFRLRGEQR           | NS3          | 1995  | 2004 | HLA-B*40:01 | Dengue virus 4 | ELISPOT          | IFNg release | Positive            |
| 180475     | GEQRKTFVEL           | NS3          | 2001  | 2010 | HLA-B*40:01 | Dengue virus 4 | ELISPOT          | IFNg release | Positive            |
| 180640     | MALKDFKEF            | NS3          | 2079  | 2087 | HLA-B*35:01 | Dengue virus 4 | ELISPOT          | IFNg release | Positive            |
| 180648     | MEGVFHTMW            | NS3          | 1516  | 1524 | HLA-B*44:03 | Dengue virus 4 | ELISPOT          | IFNg release | Positive            |
| 180778     | TPEGIPTLF            | NS3          | 1974  | 1983 | HLA-B*07:02 | Dengue virus 4 | ELISPOT          | IFNg release | Positive            |
| 180843     | YPKTKLTDWD           | NS3          | 1868  | 1877 | HLA-B*35:01 | Dengue virus 4 | ELISPOT          | IFNg release | Positive            |
| 180850     | YTEGIPTL             | NS3          | 1973  | 1982 | HLA-A*02:06 | Dengue virus 4 | ELISPOT          | IFNg release | Positive            |
| 182563     | ALSEGVYRI            | NS3          | 1491  | 1499 | HLA-A*02:01 | Dengue virus 4 | ELISPOT          | IFNg release | Positive            |
| 182919     | EFRLRGEQR            | NS3          | 1996  | 2004 | HLA-A*33:01 | Dengue virus 4 | ELISPOT          | IFNg release | Positive            |
| 183231     | FPQSNSPIED           | NS3          | 1799  | 1808 | HLA-B*35:01 | Dengue virus 4 | ELISPOT          | IFNg release | Positive            |
| 183338     | GEIGAVTLDF           | NS3          | 1595  | 1604 | HLA-B*44:03 | Dengue virus 4 | ELISPOT          | IFNg release | Positive            |
| 183407     | GLFGKTVQGV           | NS3          | 1503  | 1512 | HLA-A*02:01 | Dengue virus 4 | ELISPOT          | IFNg release | Positive            |
| 183427     | GLYGNKVVTK           | NS3          | 1622  | 1631 | HLA-A*03:01 | Dengue virus 4 | ELISPOT          | IFNg release | Positive            |
| 184079     | KLTDWDFVV            | NS3          | 398   | 406  | HLA-A*02:01 | Dengue virus 4 | ELISPOT          | IFNg release | Positive            |
| 186008     | TPPGATDPF            | NS3          | 1791  | 1799 | HLA-B*35:01 | Dengue virus 4 | ELISPOT          | IFNg release | Positive            |
| 186347     | VPNYNLIVM            | NS3          | 1749  | 1757 | HLA-B*35:01 | Dengue virus 4 | ELISPOT          | IFNg release | Positive            |
| 186602     | YSDPLALRE            | NS3          | 2077  | 2085 | HLA-A*01:01 | Dengue virus 4 | ELISPOT          | IFNg release | Positive            |
| 195838     | PNYNLIVMDEAHFTD      | NS3          | 1750  | 1764 | HLA class I | Dengue virus 4 | ICS              | IFNg release | Positive            |
| 22822      | GTSGSPINRK           | NS3          | 133   | 143  | HLA-A11     | Dengue virus 4 | 51 chromium      | cytotoxicity | Positive            |
| 239768     | GTSGSPINRK           | NS3          | 1607  | 1616 | HLA-A*03:01 | Dengue virus 4 | ELISPOT          | IFNg release | Positive            |
| 34918      | LAPTRVVAEME          | NS3          | 221   | 232  | HLA-B7      | Dengue virus 4 | 51 chromium      | cytotoxicity | Positive            |
| 539058     | AHFTDPSSVAARGYST     | NS3          | 1760  | 1776 | HLA class I | Dengue virus 4 | ICS              | IFNg release | Positive            |
| 539576     | LIVMDEAHFTDPSSVAA    | NS3          | 1754  | 1770 | HLA class I | Dengue virus 4 | ICS              | IFNg release | Positive            |
| 540029     | VEMGEAAAIFMTATPPG    | NS3          | 1778  | 1794 | HLA class I | Dengue virus 4 | ICS              | IFNg release | Positive            |
| 581940     | APTRVVAEMEEALRGL     | NS3          | 1558  | 1574 | HLA class I | Dengue virus 4 | ICS              | IFNg release | Positive-Low        |
| 62616      | SYKDREWCF            | NS3          | 389   | 397  | HLA-A24     | Dengue virus 4 | ELISPOT          | IFNg release | Positive            |
| 65552      | TPEGIPTL             | NS3          | 500   | 508  | HLA-B*35:01 | Dengue virus 4 | 51 chromium      | cytotoxicity | Positive            |
| 180596     | LETMLVALL            | NS4a         | 2144  | 2153 | HLA-B*40:01 | Dengue virus 4 | ELISPOT          | IFNg release | Positive            |
| 182508     | AIASVGLLW            | NS4a         | 2179  | 2188 | HLA-B*44:02 | Dengue virus 4 | ELISPOT          | IFNg release | Positive            |
| 182926     | EIASLPTYL            | NS4a         | 2101  | 2109 | HLA-A*68:02 | Dengue virus 4 | ELISPOT          | IFNg release | Positive            |
| 183650     | IAVASGLLW            | NS4a         | 2180  | 2188 | HLA-B*57:01 | Dengue virus 4 | ELISPOT          | IFNg release | Positive            |
| 184531     | LPSELETML            | NS4a         | 2140  | 2149 | HLA-B*35:01 | Dengue virus 4 | ELISPOT          | IFNg release | Positive            |
| 185881     | TEIASLPTYL           | NS4a         | 2100  | 2109 | HLA-B*40:01 | Dengue virus 4 | ELISPOT          | IFNg release | Positive            |
| 186620     | YVILTILT             | NS4a         | 2228  | 2236 | HLA-A*24:02 | Dengue virus 4 | ELISPOT          | IFNg release | Positive            |
| 42083      | MLVALLGAM            | NS4a         | 56    | 64   | HLA-A2      | Dengue virus 4 | ICS              | IFNg release | Positive            |
| 136826     | CYSQVNPPTL           | NS4b         | 2337  | 2346 | HLA-A*24:02 | Dengue virus 4 | ELISPOT          | IFNg release | Positive            |
| 150647     | TPMLRHTIEN           | NS4b         | 2288  | 2297 | HLA-B*07:02 | Dengue virus 4 | ELISPOT          | IFNg release | Positive            |
| 180379     | ATGPILTLLW           | NS4b         | 2436  | 2444 | HLA-B*58:01 | Dengue virus 4 | ELISPOT          | IFNg release | Positive            |
| 180383     | ATGPVLTLLW           | NS4b         | 2436  | 2444 | HLA-B*58:01 | Dengue virus 4 | ELISPOT          | IFNg release | Positive            |
| 180587     | LATGPVLTLLW          | NS4b         | 2435  | 2444 | HLA-B*53:01 | Dengue virus 4 | ELISPOT          | IFNg release | Positive            |
| 180764     | TETTLDDVDL           | NS4b         | 2262  | 2271 | HLA-B*40:01 | Dengue virus 4 | ELISPOT          | IFNg release | Positive            |
| 180803     | VPLLAMGCY            | NS4b         | 2330  | 2338 | HLA-B*35:01 | Dengue virus 4 | ELISPOT          | IFNg release | Positive            |
| 183672     | IENTSANLSL           | NS4b         | 2295  | 2304 | HLA-B*40:01 | Dengue virus 4 | ELISPOT          | IFNg release | Positive            |
| 184453     | LLLMRTTWAF           | NS4b         | 2420  | 2429 | HLA-A*24:02 | Dengue virus 4 | ELISPOT          | IFNg release | Positive            |
| 184713     | LYAVATTIL            | NS4b         | 2279  | 2287 | HLA-A*24:02 | Dengue virus 4 | ELISPOT          | IFNg release | Positive            |
| 186330     | VMLLVHYAI            | NS4b         | 2351  | 2359 | HLA-A*24:02 | Dengue virus 4 | ELISPOT          | IFNg release | Positive            |
| 37535      | LLLMRTTWA            | NS4b         | 76    | 84   | HLA-A2      | Dengue virus 4 | ICS              | TNF release  | Positive            |
| 40472      | LVMLLVHYA            | NS4b         | 6     | 14   | HLA-A2      | Dengue virus 4 | ICS              | IFNg release | Positive            |
| 1067215    | HSWEDIPLY            | NS5          | 3319  | 3327 | HLA-A*02:01 | Dengue virus 4 | ELISPOT          | IFNg release | Positive            |
| 150548     | RSNAAIGAVF           | NS5          | 2891  | 2900 | HLA-B*15:01 | Dengue virus 4 | ELISPOT          | IFNg release | Positive            |
| 180684     | NPRLCCTREEF          | NS5          | 2877  | 2886 | HLA-B*07:02 | Dengue virus 4 | ELISPOT          | IFNg release | Positive            |
| 180718     | REDLWCGSL            | NS5          | 3330  | 3338 | HLA-B*40:01 | Dengue virus 4 | ELISPOT          | IFNg release | Positive            |



|        |                   |     |      |      |             |                |         |                      |          |
|--------|-------------------|-----|------|------|-------------|----------------|---------|----------------------|----------|
| 183353 | GESSSNPTI         | NS5 | 2635 | 2643 | HLA-B*44:02 | Dengue virus 4 | ELISPOT | IFN $\gamma$ release | Positive |
| 183570 | HEMYWVSGV         | NS5 | 2703 | 2711 | HLA-B*44:02 | Dengue virus 4 | ELISPOT | IFN $\gamma$ release | Positive |
| 184051 | KLGEFGRK          | NS5 | 2948 | 2956 | HLA-A*03:01 | Dengue virus 4 | ELISPOT | IFN $\gamma$ release | Positive |
| 184130 | KREDLWCGSL        | NS5 | 3329 | 3338 | HLA-B*08:01 | Dengue virus 4 | ELISPOT | IFN $\gamma$ release | Positive |
| 184375 | LGKSYAQMWW        | NS5 | 3246 | 3254 | HLA-B*57:01 | Dengue virus 4 | ELISPOT | IFN $\gamma$ release | Positive |
| 184954 | MTTEDMLKVW        | NS5 | 3292 | 3301 | HLA class I | Dengue virus 4 | ICS     | IFN $\gamma$ release | Positive |
| 185232 | QEEHKETWHY        | NS5 | 2772 | 2781 | HLA-B*44:02 | Dengue virus 4 | ELISPOT | IFN $\gamma$ release | Positive |
| 186453 | WEPKSGWKNW        | NS5 | 3182 | 3191 | HLA-B*44:02 | Dengue virus 4 | ELISPOT | IFN $\gamma$ release | Positive |
| 186550 | YDQENPYRTW        | NS5 | 2781 | 2790 | HLA-B*44:02 | Dengue virus 4 | ELISPOT | IFN $\gamma$ release | Positive |
| 186640 | YYMATLKNV         | NS5 | 2576 | 2584 | HLA-A*24:02 | Dengue virus 4 | ELISPOT | IFN $\gamma$ release | Positive |
| 186641 | YYMATLKNT         | NS5 | 2576 | 2585 | HLA-A*24:02 | Dengue virus 4 | ELISPOT | IFN $\gamma$ release | Positive |
| 419017 | MPAMKRYSA         | NS5 | 3371 | 3380 | HLA-B*35:01 | Dengue virus 4 | ELISPOT | IFN $\gamma$ release | Positive |
| 419048 | SPRLCTREEF        | NS5 | 2877 | 2886 | HLA-B*07:02 | Dengue virus 4 | ELISPOT | IFN $\gamma$ release | Positive |
| 539149 | DCVVKPLDERFSTLLF  | NS5 | 3152 | 3168 | HLA class I | Dengue virus 4 | ICS     | IFN $\gamma$ release | Positive |
| 539656 | MAISGDDCVVKPLDERF | NS5 | 3146 | 3162 | HLA class I | Dengue virus 4 | ICS     | IFN $\gamma$ release | Positive |
| 539703 | MVTQLAMTDTTPFGQQR | NS5 | 2824 | 2840 | HLA class I | Dengue virus 4 | ICS     | IFN $\gamma$ release | Positive |



***Supplementary Table S2. Dengue polyprotein sequences of circulating viruses from India.***

*Details of the 107 full length sequences of circulating dengue viruses from India are shown.*



| NCBI_ID    | Strain_Name                   | Host  | Date       | Continent | Country | Prot_Name   | Virus_Type     |
|------------|-------------------------------|-------|------------|-----------|---------|-------------|----------------|
| UBI73847.1 | FT_MD_169_R4_DENV1D_III_India | Human | 2018-01-01 | Asia      | India   | polyprotein | Dengue virus 1 |
| ASD49619.1 | 3083                          | Human | 2014-01-01 | Asia      | India   | polyprotein | Dengue virus 1 |
| AFZ40118.1 | DENV-1/IND/55290/2005         | Human | 2005-01-01 | Asia      | India   | polyprotein | Dengue virus 1 |
| ANC57581.1 | DENV1-16687                   | Human | 2011-01-01 | Asia      | India   | polyprotein | Dengue virus 1 |
| QCZ25006.1 | FT_DNS1_295_S13_R3            | Human | 2016-10-06 | Asia      | India   | polyprotein | Dengue virus 1 |
| QCZ25005.1 | FT_DNS1_311_S14_R3            | Human | 2016-10-05 | Asia      | India   | polyprotein | Dengue virus 1 |
| QCZ25004.1 | FT_DNS1_323_S15_R3            | Human | 2016-10-07 | Asia      | India   | polyprotein | Dengue virus 1 |
| QCZ25002.1 | FT_DNS1_442_S18_R3            | Human | 2016-10-20 | Asia      | India   | polyprotein | Dengue virus 1 |
| QCZ25000.1 | FT_DNS1_449_S21_R3            | Human | 2016-08-10 | Asia      | India   | polyprotein | Dengue virus 1 |
| QCZ24998.1 | FT_DNS1_456_S24_R3            | Human | 2016-10-24 | Asia      | India   | polyprotein | Dengue virus 1 |
| QCZ24995.1 | FT_DNS1_492_S91_R3            | Human | 2016-04-09 | Asia      | India   | polyprotein | Dengue virus 1 |
| QCZ24994.1 | FT_DNS1_495_S92_R3            | Human | 2016-10-27 | Asia      | India   | polyprotein | Dengue virus 1 |
| QBA57534.1 | MCVR0543AC/2017               | Human | 2017-04-26 | Asia      | India   | polyprotein | Dengue virus 1 |
| QBA57538.1 | MCVR1715AD/2017               | Human | 2017-10-22 | Asia      | India   | polyprotein | Dengue virus 1 |
| AJP08954.1 | NIV_K130706770_India          | Human | 2013-01-07 | Asia      | India   | polyprotein | Dengue virus 1 |
| QCE20686.1 | R1_BC03_SP9_22042017          | Human | 2017-04-22 | Asia      | India   | polyprotein | Dengue virus 1 |
| AXX75607.1 | R1_J10                        | Human | 2016-01-01 | Asia      | India   | polyprotein | Dengue virus 1 |
| AXX75606.1 | R1_J47                        | Human | 2016-01-01 | Asia      | India   | polyprotein | Dengue virus 1 |
| AFN54940.1 | RGC8294                       | Human | 2007-07-26 | Asia      | India   | polyprotein | Dengue virus 1 |
| AFN54941.1 | RGC8419                       | Human | 2008-10-23 | Asia      | India   | polyprotein | Dengue virus 1 |
| AFN54942.1 | RGC8585                       | Human | 2009-04-05 | Asia      | India   | polyprotein | Dengue virus 1 |
| AFN54943.1 | RGC8592                       | Human | 2009-04-06 | Asia      | India   | polyprotein | Dengue virus 1 |
| AHZ44537.1 | RR107                         | Human | 2011-01-01 | Asia      | India   | polyprotein | Dengue virus 1 |
| AFZ40223.1 | RR121                         | Human | 2010-01-01 | Asia      | India   | polyprotein | Dengue virus 1 |
| AFZ40224.1 | RR57                          | Human | 2009-01-01 | Asia      | India   | polyprotein | Dengue virus 1 |
| QCE20685.1 | SI290                         | Human | 2016-01-09 | Asia      | India   | polyprotein | Dengue virus 1 |
| AXX75608.1 | T24_S68                       | Human | 2012-01-01 | Asia      | India   | polyprotein | Dengue virus 1 |
| AXX75609.1 | T28_S69                       | Human | 2012-01-01 | Asia      | India   | polyprotein | Dengue virus 1 |
| ASD49618.1 | UOH_21749                     | Human | 2014-01-01 | Asia      | India   | polyprotein | Dengue virus 1 |
| AFZ40227.1 | 1392                          | Human | 2009-01-01 | Asia      | India   | polyprotein | Dengue virus 2 |
| AYJ72763.1 | Cosmopolitan_1                | Human | 2012-11-08 | Asia      | India   | polyprotein | Dengue virus 2 |
| AYJ72772.1 | Cosmopolitan_10               | Human | 2012-01-01 | Asia      | India   | polyprotein | Dengue virus 2 |
| AYJ72773.1 | Cosmopolitan_11               | Human | 2014-10-28 | Asia      | India   | polyprotein | Dengue virus 2 |
| AYJ72774.1 | Cosmopolitan_12               | Human | 2013-08-19 | Asia      | India   | polyprotein | Dengue virus 2 |
| AYJ72775.1 | Cosmopolitan_13               | Human | 2013-09-04 | Asia      | India   | polyprotein | Dengue virus 2 |
| AYJ72776.1 | Cosmopolitan_14               | Human | 2014-09-16 | Asia      | India   | polyprotein | Dengue virus 2 |
| AYJ72777.1 | Cosmopolitan_15               | Human | 2015-09-09 | Asia      | India   | polyprotein | Dengue virus 2 |
| AYJ72778.1 | Cosmopolitan_16               | Human | 2015-08-31 | Asia      | India   | polyprotein | Dengue virus 2 |
| AYJ72779.1 | Cosmopolitan_17               | Human | 2014-10-25 | Asia      | India   | polyprotein | Dengue virus 2 |
| AYJ72780.1 | Cosmopolitan_18               | Human | 2013-09-09 | Asia      | India   | polyprotein | Dengue virus 2 |
| AYJ72764.1 | Cosmopolitan_2                | Human | 2014-01-01 | Asia      | India   | polyprotein | Dengue virus 2 |
| AYJ72765.1 | Cosmopolitan_3                | Human | 2013-08-30 | Asia      | India   | polyprotein | Dengue virus 2 |
| AYJ72766.1 | Cosmopolitan_4                | Human | 2014-09-22 | Asia      | India   | polyprotein | Dengue virus 2 |
| AYJ72767.1 | Cosmopolitan_5                | Human | 2014-11-07 | Asia      | India   | polyprotein | Dengue virus 2 |
| AYJ72768.1 | Cosmopolitan_6                | Human | 2012-10-08 | Asia      | India   | polyprotein | Dengue virus 2 |
| AYJ72769.1 | Cosmopolitan_7                | Human | 2012-10-19 | Asia      | India   | polyprotein | Dengue virus 2 |
| AYJ72770.1 | Cosmopolitan_8                | Human | 2012-10-19 | Asia      | India   | polyprotein | Dengue virus 2 |
| AYJ72771.1 | Cosmopolitan_9                | Human | 2012-09-24 | Asia      | India   | polyprotein | Dengue virus 2 |
| ACQ44493.1 | DENV-2/IN/BID-V2961/2006      | Human | 2006-01-01 | Asia      | India   | polyprotein | Dengue virus 2 |
| AFZ40121.1 | DENV-2/IND/053598/2005        | Human | 2005-01-01 | Asia      | India   | polyprotein | Dengue virus 2 |
| ANC57597.1 | DENV2-2627                    | Human | 2006-01-01 | Asia      | India   | polyprotein | Dengue virus 2 |
| QCZ24979.1 | FT_AJ_27_S45_R3               | Human | 2017-10-05 | Asia      | India   | polyprotein | Dengue virus 2 |
| QCZ24978.1 | FT_DNS1_101_S4_R3             | Human | 2016-09-08 | Asia      | India   | polyprotein | Dengue virus 2 |
| QCZ24977.1 | FT_DNS1_105_S5_R3             | Human | 2016-09-08 | Asia      | India   | polyprotein | Dengue virus 2 |
| QCZ24976.1 | FT_DNS1_251_S9_R3             | Human | 2016-09-11 | Asia      | India   | polyprotein | Dengue virus 2 |
| QCZ24974.1 | FT_DNS1_440_S17_R3            | Human | 2016-10-19 | Asia      | India   | polyprotein | Dengue virus 2 |
| QCZ24973.1 | FT_DNS1_443_S19_R3            | Human | 2016-10-20 | Asia      | India   | polyprotein | Dengue virus 2 |
| QCZ24971.1 | FT_DNS1_468_S30_R3            | Human | 2016-10-05 | Asia      | India   | polyprotein | Dengue virus 2 |
| QCZ24970.1 | FT_DNS1_469_S31_R3            | Human | 2016-10-13 | Asia      | India   | polyprotein | Dengue virus 2 |
| QCZ24969.1 | FT_DNS1_472_S32_R3            | Human | 2016-10-13 | Asia      | India   | polyprotein | Dengue virus 2 |
| QCZ24966.1 | FT_J221_S36_R2                | Human | 2016-08-26 | Asia      | India   | polyprotein | Dengue virus 2 |
| QCZ24965.1 | FT_J250_S45_R2                | Human | 2016-08-31 | Asia      | India   | polyprotein | Dengue virus 2 |
| QBA57539.1 | MCVR1233AD/2017               | Human | 2017-10-12 | Asia      | India   | polyprotein | Dengue virus 2 |
| QBA57535.1 | MCVR2188AB/2016               | Human | 2016-10-26 | Asia      | India   | polyprotein | Dengue virus 2 |
| QBA57537.1 | MCVR7291AD/2018               | Human | 2018-04-23 | Asia      | India   | polyprotein | Dengue virus 2 |



|            |                                   |       |            |      |       |                        |                |
|------------|-----------------------------------|-------|------------|------|-------|------------------------|----------------|
| AFZ40226.1 | Od2112                            | Human | 2011-01-01 | Asia | India | polyprotein            | Dengue virus 2 |
| AI199332.1 | P23085 INDI-60                    | Human | 2007-04-01 | Asia | India | polyprotein            | Dengue virus 2 |
| AYJ72757.1 | R1_J17_DENV2                      | Human | 2016-01-01 | Asia | India | flavivirus polyprotein | Dengue virus 2 |
| AYJ72758.1 | R1_J22_DENV2                      | Human | 2016-01-01 | Asia | India | flavivirus polyprotein | Dengue virus 2 |
| AYJ72759.1 | R1_J30_DENV2                      | Human | 2016-01-01 | Asia | India | flavivirus polyprotein | Dengue virus 2 |
| AYJ72760.1 | R1_J36_DENV2                      | Human | 2016-01-01 | Asia | India | flavivirus polyprotein | Dengue virus 2 |
| AYJ72761.1 | R1_J45_DENV2                      | Human | 2016-01-01 | Asia | India | flavivirus polyprotein | Dengue virus 2 |
| AYJ72762.1 | R1_J46_DENV2                      | Human | 2016-01-01 | Asia | India | flavivirus polyprotein | Dengue virus 2 |
| ARO52692.1 | RGCB880/2010                      | Human | 2010-09-01 | Asia | India | polyprotein            | Dengue virus 2 |
| ARO52693.1 | RGCB921/2011                      | Human | 2011-01-03 | Asia | India | polyprotein            | Dengue virus 2 |
| AFZ40225.1 | RR44                              | Human | 2009-01-01 | Asia | India | polyprotein            | Dengue virus 2 |
| AYE66920.1 | UoH_583351                        | Human | 2014-01-01 | Asia | India | polyprotein            | Dengue virus 2 |
| AYE66919.1 | UoH_58620                         | Human | 2014-01-01 | Asia | India | polyprotein            | Dengue virus 2 |
| ADM63678.1 | DEL-72                            | Human | 2008-01-01 | Asia | India | polyprotein            | Dengue virus 3 |
| AFZ40126.1 | DENV-3/IND/58760/2005             | Human | 2005-01-01 | Asia | India | polyprotein            | Dengue virus 3 |
| AFZ40127.1 | DENV-3/IND/59826/2005             | Human | 2005-01-01 | Asia | India | polyprotein            | Dengue virus 3 |
| ANC57607.1 | DENV3-2994                        | Human | 2009-01-01 | Asia | India | polyprotein            | Dengue virus 3 |
| ANC57612.1 | DENV3-9468                        | Human | 2011-01-01 | Asia | India | polyprotein            | Dengue virus 3 |
| QCZ25021.1 | FT_AJ_39_S47_R3                   | Human | 2017-10-12 | Asia | India | polyprotein            | Dengue virus 3 |
| QCZ25020.1 | FT_DNS1_473_S33_R3                | Human | 2016-10-14 | Asia | India | polyprotein            | Dengue virus 3 |
| QCZ25019.1 | FT_DNS1_494_S54_R3                | Human | 2016-08-24 | Asia | India | polyprotein            | Dengue virus 3 |
| QCZ25016.1 | FT_J226_S40_R2                    | Human | 2016-08-26 | Asia | India | polyprotein            | Dengue virus 3 |
| QCZ25017.1 | FT_J92_S12_R2                     | Human | 2016-08-10 | Asia | India | polyprotein            | Dengue virus 3 |
| QBA57533.1 | MCVR7048AB/2017                   | Human | 2017-02-21 | Asia | India | polyprotein            | Dengue virus 3 |
| QEP41653.1 | MD_33_R4_DENV3_III_India          | Human | 2017-10-27 | Asia | India | polyprotein            | Dengue virus 3 |
| ACV04798.1 | ND143                             | Human | 2007-01-01 | Asia | India | polyprotein            | Dengue virus 3 |
| AXX75610.1 | R1_J18                            | Human | 2016-01-01 | Asia | India | polyprotein            | Dengue virus 3 |
| AXX75612.1 | R1_J29                            | Human | 2016-01-01 | Asia | India | polyprotein            | Dengue virus 3 |
| AXX75611.1 | R1_J51                            | Human | 2016-01-01 | Asia | India | polyprotein            | Dengue virus 3 |
| AML29863.1 | Rajasthan.India/Balotra 87-s/2013 | Human | 2013-11-11 | Asia | India | polyprotein            | Dengue virus 3 |
| AXX75613.1 | T38_S72                           | Human | 2013-01-01 | Asia | India | polyprotein            | Dengue virus 3 |
| QEP41661   | MD_177_R4_DENV3_III_India         | Human | 2018-10-13 | Asia | India | polyprotein            | Dengue virus 3 |
| QEP41655   | MD_137_R4_DENV3_III_India         | Human | 2018-09-06 | Asia | India | polyprotein            | Dengue virus 3 |
| AVW85694.1 | D4/IND/PUNE/IRSHA-FG-01 (1028)    | Human | 2016-01-01 | Asia | India | polyprotein            | Dengue virus 4 |
| AVW85695.1 | D4/IND/PUNE/IRSHA-FG-02 (S-41)    | Human | 2016-01-01 | Asia | India | polyprotein            | Dengue virus 4 |
| AVW85696.1 | D4/IND/PUNE/IRSHA-FG-03 (S-49)    | Human | 2016-01-01 | Asia | India | polyprotein            | Dengue virus 4 |
| AFZ40130.1 | DENV-4/IND/0952326/2009           | Human | 2009-01-01 | Asia | India | polyprotein            | Dengue virus 4 |
| ANC57613.1 | DENV4-3274                        | Human | 2009-01-01 | Asia | India | polyprotein            | Dengue virus 4 |
| QBA57536.1 | MCVR4454AC/2017                   | Human | 2017-07-08 | Asia | India | polyprotein            | Dengue virus 4 |
| QCE20687.1 | R1_BC09_SP50_Blr_IND_04062017     | Human | 2017-06-04 | Asia | India | polyprotein            | Dengue virus 4 |
| ARB18129.1 | UOH_23916                         | Human | 2015-01-01 | Asia | India | polyprotein            | Dengue virus 4 |
| QDZ58859   | FT_MD_139_R4                      | Human | 2018-11-09 | Asia | India | polyprotein            | Dengue virus 4 |



**Supplementary Table S3. Alignment of CD4 and CD8 epitopes in circulating viruses from India.**

*Detailed information on the globally reported CD8/CD4 T cell epitopes that are not present in any of the viral isolates, present in all of the viral isolates, present in only 81% – <100% or 51% – 80% or in only >0% – 50% of viral isolates for each of the epitopes for all the four dengue serotypes. The globally reported CD4/CD8 T cell epitopes are organized into eight categories: DENV-1 specific CD4 epitopes, DENV-2 specific CD4 epitopes, DENV-3 specific CD4 epitopes, DENV-4 specific CD4 epitopes, DENV-1 specific CD8 epitopes, DENV-2 specific CD8 epitopes, DENV-3 specific CD8 epitopes and DENV-4 specific CD8 epitopes. In each category, identity in individual viral isolates is detailed. Green color shade and number 1 indicates 100% identity in the given viral isolate. Pink color shade and number zero indicates not identical in the given viral isolate.*



### CD4 DENV-1 Epitopes

[illegible]



[illegible]















[illegible]



### CD4 DENV-3 Epitopes

[illegible]



[illegible]



|        |                      |      |      |      |                           |           |                |                          |              |          |   |   |   |   |   |   |   |   |   |   |   |   |   |   |   |   |   |
|--------|----------------------|------|------|------|---------------------------|-----------|----------------|--------------------------|--------------|----------|---|---|---|---|---|---|---|---|---|---|---|---|---|---|---|---|---|
| 739553 | LGMMHQFGSAYTA        | E    | 710  | 728  | HLA-DRB1*04:03            | 81% <100% | Dengue virus 3 | ELISPT                   | IFNg release | Positive | 1 | 1 | 1 | 1 | 0 | 1 | 1 | 1 | 1 | 1 | 1 | 0 | 1 | 1 | 1 | 1 | 1 |
| 739011 | GGVNSLGMKHQHF        | E    | 704  | 714  | HLA-DRB1*11:04            | 81% <100% | Dengue virus 3 | ELISPT                   | IFNg release | Positive | 1 | 1 | 1 | 1 | 0 | 1 | 1 | 1 | 1 | 1 | 1 | 1 | 0 | 1 | 1 | 1 | 1 |
| 739041 | GMSVMACNTFVLVK       | E    | 574  | 588  | HLA-DRB1*04:07            | 81% <100% | Dengue virus 3 | ELISPT                   | IFNg release | Positive | 1 | 1 | 1 | 1 | 1 | 0 | 1 | 1 | 1 | 1 | 1 | 1 | 1 | 1 | 1 | 1 | 1 |
| 739344 | KMHHQFGSAYTALF       | E    | 31   | 45   | HLA-DRB3*02:02            | 81% <100% | Dengue virus 3 | ELISPT                   | IFNg release | Positive | 1 | 1 | 1 | 1 | 1 | 0 | 1 | 1 | 1 | 1 | 1 | 1 | 1 | 0 | 1 | 1 | 1 |
| 740409 | MVGVSJNSLGMKHQ       | E    | 702  | 716  | HLA-DRB1*11:04            | 81% <100% | Dengue virus 3 | ELISPT                   | IFNg release | Positive | 1 | 1 | 1 | 1 | 1 | 0 | 1 | 1 | 1 | 1 | 1 | 1 | 1 | 1 | 1 | 1 | 1 |
| 741747 | SGKVGVHQRHVGLSGATW   | E    | 281  | 300  | HLA-C*08:01               | 81% <100% | Dengue virus 3 | ELISPT                   | IFNg release | Positive | 1 | 1 | 1 | 1 | 1 | 1 | 0 | 1 | 1 | 1 | 1 | 1 | 1 | 1 | 1 | 1 | 1 |
| 868175 | MYHRQWFDFPLPWMT      | E    | 485  | 499  | HLA-DQA1*01:01/DQB1*05:01 | 81% <100% | Dengue virus 3 | ELISPT                   | IFNg release | Positive | 1 | 1 | 1 | 1 | 1 | 1 | 1 | 1 | 1 | 1 | 1 | 1 | 1 | 1 | 1 | 1 | 1 |
| 190705 | AKVIETATNSSFII       | NS1  | 894  | 908  | HLA-DRB1*04:01            | 81% <100% | Dengue virus 3 | ELISPT                   | IFNg release | Positive | 0 | 1 | 1 | 1 | 1 | 1 | 1 | 1 | 1 | 1 | 1 | 1 | 0 | 1 | 1 | 1 | 1 |
| 190996 | TEGYKFQADSPKRLA      | NS1  | 802  | 816  | HLA-DRB5*01:01            | 81% <100% | Dengue virus 3 | ELISPT                   | IFNg release | Positive | 1 | 1 | 1 | 1 | 1 | 1 | 1 | 1 | 1 | 1 | 1 | 1 | 1 | 1 | 1 | 1 | 1 |
| 195419 | GSWKLVKLSELEIVCT     | NS1  | 981  | 995  | HLA-DRB1*01:01            | 81% <100% | Dengue virus 3 | ELISPT                   | IFNg release | Positive | 1 | 1 | 1 | 1 | 1 | 0 | 1 | 1 | 1 | 1 | 1 | 1 | 1 | 1 | 0 | 1 | 1 |
| 195577 | LKTVVGDITGVELEQ      | NS1  | 858  | 872  | HLA-DRB1*03:01            | 81% <100% | Dengue virus 3 | ELISPT                   | IFNg release | Positive | 1 | 1 | 1 | 1 | 1 | 1 | 1 | 1 | 1 | 1 | 1 | 1 | 1 | 1 | 1 | 1 | 1 |
| 196219 | KYGFQASPKRLATA       | NS1  | 805  | 819  | HLA-DRB1*03:01            | 81% <100% | Dengue virus 3 | ELISPT                   | IFNg release | Positive | 1 | 1 | 1 | 1 | 1 | 1 | 1 | 1 | 1 | 1 | 1 | 1 | 1 | 1 | 1 | 1 | 1 |
| 196712 | NGSWLKLEAGLEVW       | NS1  | 980  | 994  | HLA-DRB1*09:01            | 81% <100% | Dengue virus 3 | ELISPT                   | IFNg release | Positive | 1 | 1 | 1 | 1 | 1 | 0 | 1 | 1 | 1 | 1 | 1 | 1 | 1 | 1 | 1 | 0 | 1 |
| 539825 | QKFKQDASPCKRLATA     | NS1  | 804  | 818  | HLA-DRB3*02:02            | 81% <100% | Dengue virus 3 | ELISPT                   | IFNg release | Positive | 1 | 1 | 1 | 1 | 0 | 1 | 1 | 1 | 1 | 1 | 1 | 1 | 1 | 1 | 1 | 1 | 1 |
| 167810 | RENNLLGVGLAMATTQLQPE | NS2a | 1224 | 1243 | HLA-DP                    | 81% <100% | Dengue virus 3 | ELISPT                   | IFNg release | Positive | 1 | 1 | 1 | 1 | 0 | 1 | 1 | 1 | 1 | 1 | 1 | 1 | 1 | 0 | 1 | 1 | 1 |
| 195632 | LGFFLRKLTSRNNL       | N52a | 1234 | 1228 | HLA-DRB1*11:01            | 81% <100% | Dengue virus 3 | ELISPT                   | IFNg release | Positive | 1 | 1 | 1 | 1 | 1 | 1 | 1 | 1 | 1 | 1 | 1 | 1 | 1 | 1 | 1 | 1 | 1 |
| 195645 | LDSRSRTFTTLTV        | N52a | 1274 | 1288 | HLA-DRB1*02:01            | 81% <100% | Dengue virus 3 | ELISPT                   | IFNg release | Positive | 1 | 1 | 1 | 1 | 1 | 1 | 1 | 1 | 1 | 1 | 1 | 1 | 1 | 1 | 1 | 1 | 1 |
| 195836 | PILFSLDKTKVRHS       | N52a | 1300 | 1344 | HLA-DRB1*11:01            | 81% <100% | Dengue virus 3 | ELISPT                   | IFNg release | Positive | 1 | 1 | 1 | 1 | 1 | 1 | 1 | 1 | 1 | 1 | 1 | 1 | 0 | 1 | 1 | 1 | 1 |
| 195912 | RTATUAGAOLSVLPV      | NS2a | 1291 | 1305 | HLA-DRB1*03:01            | 81% <100% | Dengue virus 3 | ELISPT                   | IFNg release | Positive | 1 | 1 | 1 | 1 | 0 | 1 | 1 | 1 | 1 | 1 | 1 | 1 | 1 | 1 | 1 | 0 | 1 |
| 767442 | KLTFQETVQLWTAL       | NS2a | 1260 | 1274 | HLA-DRB1*02:01            | 81% <100% | Dengue virus 3 | ELISPT                   | IFNg release | Positive | 1 | 1 | 1 | 1 | 1 | 1 | 1 | 1 | 1 | 1 | 1 | 0 | 1 | 1 | 1 | 1 | 1 |
| 860406 | MAKLTKTETQETVQLW     | NS2a | 1257 | 1271 | HLA-DRB1*01:01            | 81% <100% | Dengue virus 3 | ELISPT                   | IFNg release | Positive | 1 | 0 | 1 | 1 | 1 | 1 | 1 | 1 | 1 | 1 | 1 | 1 | 1 | 1 | 1 | 0 | 1 |
| 868319 | PILPLFSLDKTKLR       | NS2a | 1328 | 1342 | HLA-DRB1*01:01            | 81% <100% | Dengue virus 3 | ELISPT                   | IFNg release | Positive | 1 | 1 | 1 | 1 | 1 | 1 | 1 | 1 | 1 | 1 | 1 | 1 | 1 | 1 | 1 | 0 | 1 |
| 868794 | TOFETVQLWTALVLS      | NS2a | 1263 | 1277 | HLA-DRB1*02:01            | 81% <100% | Dengue virus 3 | ELISPT                   | IFNg release | Positive | 1 | 1 | 1 | 1 | 1 | 1 | 1 | 1 | 1 | 1 | 1 | 1 | 1 | 1 | 1 | 1 | 1 |
| 195180 | ASLLNDVPMAGPLV       | NS2b | 1361 | 1375 | HLA-DRB1*03:01            | 81% <100% | Dengue virus 3 | ELISPT                   | IFNg release | Positive | 1 | 0 | 1 | 1 | 1 | 1 | 1 | 1 | 1 | 1 | 1 | 1 | 1 | 1 | 1 | 1 | 1 |
| 195789 | NLTLVLLKLTALLVS      | NS2b | 1436 | 1450 | HLA-DRB1*01:01            | 81% <100% | Dengue virus 3 | ELISPT                   | IFNg release | Positive | 1 | 1 | 0 | 1 | 1 | 1 | 1 | 1 | 1 | 1 | 1 | 1 | 1 | 1 | 1 | 0 | 1 |
| 195994 | SSLRNDVPMAGPLV       | NS2b | 1362 | 1376 | HLA-DRB1*03:01            | 81% <100% | Dengue virus 3 | ELISPT                   | IFNg release | Positive | 1 | 1 | 1 | 1 | 1 | 1 | 1 | 1 | 1 | 1 | 1 | 1 | 1 | 1 | 1 | 1 | 1 |
| 150544 | RLRLTLUATPRTVA       | NS3  | 1688 | 1702 | HLA-DRB1*01:01            | 81% <100% | Dengue virus 3 | ELISPT                   | IFNg release | Positive | 1 | 1 | 0 | 1 | 1 | 1 | 1 | 1 | 1 | 1 | 1 | 1 | 1 | 1 | 1 | 1 | 1 |
| 190732 | EAAMFMTATPPTGA       | NS3  | 1782 | 1796 | HLA-DRB1*04:03            | 81% <100% | Dengue virus 3 | ELISPT                   | IFNg release | Positive | 0 | 1 | 1 | 1 | 1 | 1 | 1 | 1 | 1 | 1 | 1 | 1 | 1 | 1 | 1 | 1 | 1 |
| 195901 | RLRLTLUATPRTVA       | NS3  | 1689 | 1703 | HLA-DRB1*04:03            | 81% <100% | Dengue virus 3 | ELISPT                   | IFNg release | Positive | 1 | 1 | 1 | 1 | 1 | 1 | 1 | 1 | 1 | 1 | 1 | 1 | 1 | 1 | 1 | 1 | 1 |
| 30395  | KGEEKKLKRPWILDA      | NS3  | 585  | 599  | HLA-class II              | 81% <100% | Dengue virus 3 | ICS                      | IFNg release | Positive | 1 | 0 | 1 | 1 | 1 | 1 | 1 | 1 | 1 | 1 | 1 | 1 | 0 | 1 | 1 | 1 | 1 |
| 39     | AAAFMTATPPTGAD       | NS3  | 1783 | 1797 | HLA-DRB1*04:03            | 81% <100% | Dengue virus 3 | ELISPT                   | IFNg release | Positive | 0 | 1 | 1 | 1 | 1 | 1 | 1 | 1 | 1 | 1 | 1 | 1 | 0 | 1 | 1 | 1 | 1 |
| 539028 | AAAFMTATPPTGAD       | NS3  | 1784 | 1798 | HLA-DRB1*10:01            | 81% <100% | Dengue virus 3 | ELISPT                   | IFNg release | Positive | 0 | 1 | 1 | 1 | 1 | 1 | 1 | 1 | 1 | 1 | 1 | 1 | 0 | 1 | 1 | 1 | 1 |
| 193818 | REAKIRRLRTLAP        | NS3  | 1683 | 1697 | HLA-DRB1*14:04            | 81% <100% | Dengue virus 3 | ELISPT                   | IFNg release | Positive | 1 | 0 | 0 | 1 | 1 | 1 | 1 | 1 | 1 | 1 | 1 | 1 | 1 | 1 | 1 | 1 | 1 |
| 540019 | VGILNGVGVTKNGGY      | NS3  | 9    | 23   | HLA-DRB1*15:06            | 81% <100% | Dengue virus 3 | ELISPT                   | IFNg release | Positive | 1 | 1 | 1 | 1 | 1 | 1 | 1 | 1 | 1 | 1 | 1 | 1 | 1 | 1 | 1 | 1 | 1 |
| 55024  | RNTIMDLVRSQGT        | NS3  | 187  | 201  | HLA-class II              | 81% <100% | Dengue virus 3 | ICS                      | IFNg release | Positive | 1 | 1 | 1 | 1 | 1 | 1 | 1 | 1 | 1 | 1 | 1 | 1 | 1 | 1 | 1 | 1 | 1 |
| 66127  | TRVAAEMEEA           | NS3  | 225  | 235  | HLA-DR15                  | 81% <100% | Dengue virus 3 | 51 chromium cytotoxicity |              | Positive | 1 | 1 | 1 | 1 | 0 | 1 | 1 | 1 | 1 | 1 | 1 | 1 | 1 | 1 | 1 | 1 | 1 |
| 867875 | LNDWDFVYTDISEM       | NS3  | 1873 | 1887 | HLA-DQA1*03:01/DQB1*03:02 | 81% <100% | Dengue virus 3 | ELISPT                   | IFNg release | Positive | 1 | 0 | 1 | 1 | 1 | 1 | 1 | 1 | 1 | 1 | 1 | 1 | 1 | 1 | 1 | 1 | 1 |
| 195522 | LPLQWIASAVLEFF       | NS4a | 2192 | 2206 | HLA-DRB1*01:01            | 81% <100% | Dengue virus 3 | ELISPT                   | IFNg release | Positive | 1 | 1 | 1 | 1 | 1 | 1 | 1 | 1 | 1 | 1 | 1 | 1 | 0 | 1 | 1 | 1 | 1 |
| 195828 | PETMETLLGLLML        | NS4a | 2141 | 2155 | HLA-DRB1*15:06            | 81% <100% | Dengue virus 3 | ELISPT                   | IFNg release | Positive | 1 | 1 | 1 | 1 | 1 | 1 | 1 | 1 | 1 | 1 | 1 | 1 | 1 | 1 | 1 | 1 | 1 |
| 196065 | TULLGLMLTQGA         | NS4a | 2146 | 2160 | HLA-DRB1*15:06            | 81% <100% | Dengue virus 3 | ELISPT                   | IFNg release | Positive | 1 | 1 | 1 | 1 | 1 | 1 | 1 | 1 | 1 | 1 | 1 | 1 | 1 | 1 | 1 | 1 | 1 |
| 739464 | LTLSGQSGTSGISG       | NS4a | 2162 | 2176 | HLA-DRB1*02:02            | 81% <100% | Dengue virus 3 | ELISPT                   | IFNg release | Positive | 1 | 1 | 1 | 1 | 0 | 1 | 1 | 1 | 1 | 1 | 1 | 1 | 1 | 1 | 1 | 1 | 1 |
| 167753 | HVNAPEPTPNMDVGERIK   | N55  | 263  | 282  | HLA-class II              | 81% <100% | Dengue virus 3 | ELISPT                   | IFNg release | Positive | 1 | 1 | 1 | 1 | 1 | 0 | 1 | 1 | 1 | 1 | 1 | 1 | 1 | 1 | 1 | 1 | 1 |
| 195382 | KGVRKDIPQWQSPK       | N55  | 3175 | 3189 | HLA-DRB1*03:01            | 81% <100% | Dengue virus 3 | ELISPT                   | IFNg release | Positive | 1 | 1 | 1 | 1 | 1 | 1 | 1 | 1 | 1 | 1 | 1 | 1 | 0 | 0 | 1 | 1 | 1 |
| 195668 | LLRNTMTTHRPTE        | N55  | 16   | 30   | HLA-DRB1*11:01            | 81% <100% | Dengue virus 3 | ELISPT                   | IFNg release | Positive | 1 | 1 | 1 | 1 | 0 | 0 | 1 | 1 | 1 | 1 | 1 | 1 | 1 | 1 | 1 | 1 | 1 |
| 195779 | NDMGSVKRDPQWQSP      | N55  | 3172 | 3186 | HLA-DRB1*03:01            | 81% <100% | Dengue virus 3 | ELISPT                   | IFNg release | Positive | 1 | 1 | 1 | 1 | 1 | 1 | 1 | 1 | 1 | 1 | 1 | 1 | 0 | 1 | 1 | 1 | 1 |
| 195817 | NRTMTTHRPTEISD       | N55  | 18   | 32   | HLA-DRB1*11:01            | 81% <100% | Dengue virus 3 | ELISPT                   | IFNg release | Positive | 1 | 1 | 1 | 1 | 1 | 1 | 1 | 1 | 1 | 1 | 1 | 1 | 1 | 1 | 1 | 1 | 1 |
| 195875 | RAIWMWMLGARLYEF      | N55  | 2961 | 2975 | HLA-DRB1*01:01            | 81% <100% | Dengue virus 3 | ELISPT                   | IFNg release | Positive | 0 | 1 | 1 | 1 | 0 | 1 | 1 | 1 | 1 | 1 | 1 | 1 | 0 | 0 | 1 | 1 | 1 |
| 195939 | SCVNMNMKKREKGLG      | N55  | 2938 | 2952 | HLA-DRB1*11:01            | 81% <100% | Dengue virus 3 | ELISPT                   | IFNg release | Positive | 1 | 0 | 1 | 1 | 1 | 1 | 1 | 1 | 1 | 1 | 1 | 1 | 1 | 1 | 1 | 1 | 1 |
| 231420 | LFLEFALGFUNEDH       | N55  | 2971 | 2985 | HLA-DRB1*04:01            | 81% <100% | Dengue virus 3 | ELISPT                   | IFNg release | Positive | 1 | 1 | 1 | 1 | 1 | 0 | 1 | 1 | 1 | 1 | 1 | 1 | 1 | 1 | 1 | 1 | 1 |
| 539458 | KCCSGVNMNMKKREK      | N55  | 2935 | 2949 | HLA-DRB1*13:01            | 81% <100% | Dengue virus 3 | ELISPT                   | IFNg release | Positive | 1 | 1 | 1 | 1 | 1 | 1 | 1 | 1 | 1 | 1 | 1 | 1 | 1 | 1 | 1 | 1 | 1 |
| 539831 | RATWAGNPITAQGV       | N55  | 3346 | 3360 | HLA-DRB1*09:01            | 81% <100% | Dengue virus 3 | ELISPT                   | IFNg release | Positive | 1 | 1 | 1 | 1 | 1 | 1 | 1 | 1 | 1 | 1 | 1 | 1 | 1 | 1 | 1 | 1 | 1 |
| 74871  | ESFLDYLSKARFRK       | N55  | 3367 | 3381 | HLA-DRB1*14:01            | 81% <100% | Dengue virus 3 | ELISPT                   | IFNg release | Positive | 1 | 1 | 1 | 1 | 1 | 0 | 1 | 1 | 1 | 1 | 1 | 1 | 1 | 1 | 1 | 1 | 1 |
| 738759 | FLDYNSPMKRRFK        | N55  | 3368 | 3382 | HLA-DRB1*14:06            | 81% <100% | Dengue virus 3 | ELISPT                   | IFNg release | Positive | 1 | 1 | 1 | 1 | 1 | 1 | 1 | 1 | 1 | 1 | 1 | 1 | 1 | 1 | 1 | 1 | 1 |
| 857703 | IWMWMLGARLYEFA       | N55  | 2963 | 2977 | HLA-DRB1*04:01            | 81% <100% | Dengue virus 3 | ELISPT                   | IFNg release | Positive | 0 | 1 | 1 | 1 | 1 | 1 | 1 | 1 | 1 | 1 | 1 | 1 | 0 | 0 | 1 | 1 | 1 |
| 867015 | GSVNMNMKKREKLL       | NS5  | 2937 | 2951 | HLA-DRB5*01:01            | 81% <100% | Dengue virus 3 | ELISPT                   | IFNg release | Positive | 1 | 0 | 1 | 1 | 1 | 1 | 1 | 1 | 1 | 1 | 1 | 1 | 1 | 1 | 1 | 1 | 1 |
| 868338 | PMSTYGVNMVLMSSG      | N55  | 2605 | 2619 | HLA-DQA1*01:01/DQB1*05:01 | 81% <100% | Dengue virus 3 | ELISPT                   | IFNg release | Positive | 1 | 1 | 1 | 1 | 1 | 1 | 1 | 1 | 1 | 1 | 1 | 1 | 1 | 1 | 1 | 1 | 1 |
| 195865 | WPMWMLGARLYEFA       | N55  | 2964 | 2978 | HLA-DQA1*01:01/DQB1*05:01 | 81% <100% | Dengue virus 3 | ELISPT                   | IFNg release | Positive | 1 | 1 | 1 | 1 | 1 | 1 | 1 | 1 | 1 | 1 | 1 | 1 | 1 | 1 | 1 | 1 | 1 |
| 195407 | IKVLGKGFKEKSNL       | C    |      |      |                           |           |                |                          |              |          |   |   |   |   |   |   |   |   |   |   |   |   |   |   |   |   |   |



|        |                  |      |      |      |                |           |                |         |              |          |   |   |   |   |   |   |   |   |   |   |   |   |   |   |   |   |   |   |   |   |
|--------|------------------|------|------|------|----------------|-----------|----------------|---------|--------------|----------|---|---|---|---|---|---|---|---|---|---|---|---|---|---|---|---|---|---|---|---|
| 869526 | VLLLVTHYAI GPGL  | NS4b | 2353 | 2367 | HLA-DPB1*02:01 | >0% - 50% | Dengue virus 3 | ELISPOT | IFNγ release | Positive | 0 | 0 | 0 | 0 | 0 | 1 | 1 | 1 | 0 | 1 | 1 | 1 | 0 | 0 | 0 | 1 | 0 | 0 | 1 | 1 |
| 196239 | YQNKVVVKVQRPTPKG | NS5  | 3062 | 3076 | HLA-DRB1*08:02 | >0% - 50% | Dengue virus 3 | ELISPOT | IFNγ release | Positive | 0 | 0 | 0 | 0 | 0 | 0 | 0 | 0 | 0 | 0 | 0 | 0 | 0 | 1 | 0 | 0 | 0 | 0 | 0 | 0 |



### CD4 DENV-4 Epitopes

|            |                       |              |       |      |                           |      |                |                  |              |                     | NCBI IDs of DENV-4 circulating strains from India, (100% identity=1,green ; else 0 , red) |            |            |            |            |            |           |            |          |  |
|------------|-----------------------|--------------|-------|------|---------------------------|------|----------------|------------------|--------------|---------------------|-------------------------------------------------------------------------------------------|------------|------------|------------|------------|------------|-----------|------------|----------|--|
| Epitope_ID | AA_Seq                | Protein_Name | Start | End  | Allele                    | step | Serotype       | Method/Technique | Assay Group  | Qualitative Measure | AVW85694.1                                                                                | AVW85695.1 | AVW85696.1 | AF240130.1 | ANCS7613.1 | QBAS7536.1 | QC20687.1 | ARB18129.1 | QD258859 |  |
| 195483     | IGFRKEIGRMLNILN       | C            | 81    | 95   | HLA-DRB1*04:01            | 0%   | Dengue virus 4 | ELISPOT          | IFNg release | Positive            | 0                                                                                         | 0          | 0          | 0          | 0          | 0          | 0         | 0          | 0        |  |
| 195488     | IGRMLNILNRRKRST       | C            | 87    | 101  | HLA-DRB1*14:02            | 0%   | Dengue virus 4 | ELISPOT          | IFNg release | Positive            | 0                                                                                         | 0          | 0          | 0          | 0          | 0          | 0         | 0          | 0        |  |
| 195580     | KNKAIKILIGFRKEI       | C            | 53    | 67   | HLA-DRB1*15:01            | 0%   | Dengue virus 4 | ELISPOT          | IFNg release | Positive            | 0                                                                                         | 0          | 0          | 0          | 0          | 0          | 0         | 0          | 0        |  |
| 195768     | MTLLCLIPTAMAFHL       | C            | 102   | 116  | HLA-DRB1*01:01            | 0%   | Dengue virus 4 | ELISPOT          | IFNg release | Positive            | 0                                                                                         | 0          | 0          | 0          | 0          | 0          | 0         | 0          | 0        |  |
| 195922     | RWGQLKKTKAIKILT       | C            | 67    | 81   | HLA-DRB1*07:01            | 0%   | Dengue virus 4 | ELISPOT          | IFNg release | Positive            | 0                                                                                         | 0          | 0          | 0          | 0          | 0          | 0         | 0          | 0        |  |
| 196065     | TPQGLVKRFSSGLFS       | C            | 24    | 38   | HLA-DRB1*15:01            | 0%   | Dengue virus 4 | ELISPOT          | IFNg release | Positive            | 0                                                                                         | 0          | 0          | 0          | 0          | 0          | 0         | 0          | 0        |  |
| 36533      | LIGFRKEIGRML          | C            | 80    | 91   | HLA-DPw4                  | 0%   | Dengue virus 4 | ICS              | IFNg release | Positive            | 0                                                                                         | 0          | 0          | 0          | 0          | 0          | 0         | 0          | 0        |  |
| 539571     | LIGFRKEIGRMLNIL       | C            | 80    | 94   | HLA-DRB1*09:01            | 0%   | Dengue virus 4 | ELISPOT          | IFNg release | Positive            | 0                                                                                         | 0          | 0          | 0          | 0          | 0          | 0         | 0          | 0        |  |
| 539581     | LKKNKAIKILIGFRK       | C            | 51    | 65   | HLA-DRB1*14:04            | 0%   | Dengue virus 4 | ELISPOT          | IFNg release | Positive            | 0                                                                                         | 0          | 0          | 0          | 0          | 0          | 0         | 0          | 0        |  |
| 540116     | WGQLKKNKAIKILIG       | C            | 68    | 82   | HLA-DRB1*09:01            | 0%   | Dengue virus 4 | ELISPOT          | IFNg release | Positive            | 0                                                                                         | 0          | 0          | 0          | 0          | 0          | 0         | 0          | 0        |  |
| 739606     | GRMLNILNGRKRSTM       | C            | 88    | 102  | HLA-DRB1*14:02            | 0%   | Dengue virus 4 | ELISPOT          | IFNg release | Positive            | 0                                                                                         | 0          | 0          | 0          | 0          | 0          | 0         | 0          | 0        |  |
| 739178     | IGRMLNILNRRRRST       | C            | 87    | 101  | HLA-DRB1*14:02            | 0%   | Dengue virus 4 | ELISPOT          | IFNg release | Positive            | 0                                                                                         | 0          | 0          | 0          | 0          | 0          | 0         | 0          | 0        |  |
| 868732     | RWGQLKKNKAIKILI       | C            | 39    | 53   | HLA-DRB3*02:02            | 0%   | Dengue virus 4 | ELISPOT          | IFNg release | Positive            | 0                                                                                         | 0          | 0          | 0          | 0          | 0          | 0         | 0          | 0        |  |
| 195916     | RTVFFVLMLMLVAPSY      | PreM         | 264   | 278  | HLA-DRB1*01:01            | 0%   | Dengue virus 4 | ELISPOT          | IFNg release | Positive            | 0                                                                                         | 0          | 0          | 0          | 0          | 0          | 0         | 0          | 0        |  |
| 869670     | WCNLTSWTVMVYGTCT      | PreM         | 180   | 194  | HLA-DQA1*01:02/DOB1*06:02 | 0%   | Dengue virus 4 | ELISPOT          | IFNg release | Positive            | 0                                                                                         | 0          | 0          | 0          | 0          | 0          | 0         | 0          | 0        |  |
| 167808     | RDVNEKVGVRVISTPLAE    | E            | 340   | 359  | HLA class II              | 0%   | Dengue virus 4 | ELISPOT          | IFNg release | Positive            | 0                                                                                         | 0          | 0          | 0          | 0          | 0          | 0         | 0          | 0        |  |
| 195227     | DSYIVIGVGNLSALT       | E            | 654   | 668  | HLA-DRB1*15:06            | 0%   | Dengue virus 4 | ELISPOT          | IFNg release | Positive            | 0                                                                                         | 0          | 0          | 0          | 0          | 0          | 0         | 0          | 0        |  |
| 195364     | GGVSWMIRILIGILV       | E            | 449   | 463  | HLA-DRB1*15:06            | 0%   | Dengue virus 4 | ELISPOT          | IFNg release | Positive            | 0                                                                                         | 0          | 0          | 0          | 0          | 0          | 0         | 0          | 0        |  |
| 195434     | GVSWMIRILIGFLVL       | E            | 729   | 743  | HLA-DRB1*08:02            | 0%   | Dengue virus 4 | ELISPOT          | IFNg release | Positive            | 0                                                                                         | 0          | 0          | 0          | 0          | 0          | 0         | 0          | 0        |  |
| 195435     | GVSWMIRILIGLLVL       | E            | 729   | 743  | HLA-DRB1*15:06            | 0%   | Dengue virus 4 | ELISPOT          | IFNg release | Positive            | 0                                                                                         | 0          | 0          | 0          | 0          | 0          | 0         | 0          | 0        |  |
| 195625     | LESTYRGAKRMAILG       | E            | 681   | 695  | HLA-DRB1*14:02            | 0%   | Dengue virus 4 | ELISPOT          | IFNg release | Positive            | 0                                                                                         | 0          | 0          | 0          | 0          | 0          | 0         | 0          | 0        |  |
| 196036     | TGIQRTVFFVLMLLV       | E            | 44    | 58   | HLA-DRB1*07:01            | 0%   | Dengue virus 4 | ELISPOT          | IFNg release | Positive            | 0                                                                                         | 0          | 0          | 0          | 0          | 0          | 0         | 0          | 0        |  |
| 196189     | VSWIIRILIGLLVLW       | E            | 451   | 465  | HLA-DRB1*15:06            | 0%   | Dengue virus 4 | ELISPOT          | IFNg release | Positive            | 0                                                                                         | 0          | 0          | 0          | 0          | 0          | 0         | 0          | 0        |  |
| 539230     | EMILMKMKKKTWLVH       | E            | 474   | 488  | HLA-DRB1*12:02            | 0%   | Dengue virus 4 | ELISPOT          | IFNg release | Positive            | 0                                                                                         | 0          | 0          | 0          | 0          | 0          | 0         | 0          | 0        |  |
| 195791     | NIMWVKQITNELNYVL      | NS1          | 839   | 853  | HLA-DRB1*04:07            | 0%   | Dengue virus 4 | ELISPOT          | IFNg release | Positive            | 0                                                                                         | 0          | 0          | 0          | 0          | 0          | 0         | 0          | 0        |  |
| 539829     | QYQOPESPARLASA        | NS1          | 805   | 819  | HLA-DRB1*09:01            | 0%   | Dengue virus 4 | ELISPOT          | IFNg release | Positive            | 0                                                                                         | 0          | 0          | 0          | 0          | 0          | 0         | 0          | 0        |  |
| 167725     | AMITTLTSLPHDLMEIDIGIS | NS2a         | 50    | 69   | HLA class II              | 0%   | Dengue virus 4 | ELISPOT          | IFNg release | Positive            | 0                                                                                         | 0          | 0          | 0          | 0          | 0          | 0         | 0          | 0        |  |
| 195156     | ALSLTFIRSTMPLVM       | NS2a         | 1274  | 1288 | HLA-DRB1*07:01            | 0%   | Dengue virus 4 | ELISPOT          | IFNg release | Positive            | 0                                                                                         | 0          | 0          | 0          | 0          | 0          | 0         | 0          | 0        |  |
| 195157     | ALSLTFIRSTMSLVM       | NS2a         | 1274  | 1288 | HLA-DRB1*04:01            | 0%   | Dengue virus 4 | ELISPOT          | IFNg release | Positive            | 0                                                                                         | 0          | 0          | 0          | 0          | 0          | 0         | 0          | 0        |  |
| 195158     | ALSLTFIRSTTPLVM       | NS2a         | 1274  | 1288 | HLA-DRB1*07:01            | 0%   | Dengue virus 4 | ELISPOT          | IFNg release | Positive            | 0                                                                                         | 0          | 0          | 0          | 0          | 0          | 0         | 0          | 0        |  |
| 195190     | AVFKMSPGVYGVFL        | NS2a         | 1204  | 1218 | HLA-DRB1*01:01            | 0%   | Dengue virus 4 | ELISPOT          | IFNg release | Positive            | 0                                                                                         | 0          | 0          | 0          | 0          | 0          | 0         | 0          | 0        |  |
| 195221     | DLMELISGISLGLIL       | NS2a         | 1243  | 1257 | HLA-DRB1*07:01            | 0%   | Dengue virus 4 | ELISPOT          | IFNg release | Positive            | 0                                                                                         | 0          | 0          | 0          | 0          | 0          | 0         | 0          | 0        |  |
| 195746     | MAVFKMSPGVYGVFL       | NS2a         | 1203  | 1217 | HLA-DRB1*07:01            | 0%   | Dengue virus 4 | ELISPOT          | IFNg release | Positive            | 0                                                                                         | 0          | 0          | 0          | 0          | 0          | 0         | 0          | 0        |  |
| 196061     | TMSLVMAWRTIMAVL       | NS2a         | 1283  | 1297 | HLA-DRB1*03:01            | 0%   | Dengue virus 4 | ELISPOT          | IFNg release | Positive            | 0                                                                                         | 0          | 0          | 0          | 0          | 0          | 0         | 0          | 0        |  |
| 196070     | TRKHMLAVVITLCA        | NS2a         | 1154  | 1168 | HLA-DRB1*08:02            | 0%   | Dengue virus 4 | ELISPOT          | IFNg release | Positive            | 0                                                                                         | 0          | 0          | 0          | 0          | 0          | 0         | 0          | 0        |  |
| 196253     | YVLGVFLRKLTSLRET      | NS2a         | 1212  | 1226 | HLA-DRB1*11:01            | 0%   | Dengue virus 4 | ELISPOT          | IFNg release | Positive            | 0                                                                                         | 0          | 0          | 0          | 0          | 0          | 0         | 0          | 0        |  |
| 539130     | CLRRRVTRKHMLAV        | NS2a         | 1148  | 1162 | HLA-DRB1*08:03            | 0%   | Dengue virus 4 | ELISPOT          | IFNg release | Positive            | 0                                                                                         | 0          | 0          | 0          | 0          | 0          | 0         | 0          | 0        |  |
| 539198     | ECLRRRVTRKHMLA        | NS2a         | 1147  | 1161 | HLA-DRB1*13:01            | 0%   | Dengue virus 4 | ELISPOT          | IFNg release | Positive            | 0                                                                                         | 0          | 0          | 0          | 0          | 0          | 0         | 0          | 0        |  |
| 539360     | GVFLRKLTSLRETALM      | NS2a         | 1215  | 1229 | HLA-DRB1*10:01            | 0%   | Dengue virus 4 | ELISPOT          | IFNg release | Positive            | 0                                                                                         | 0          | 0          | 0          | 0          | 0          | 0         | 0          | 0        |  |
| 539406     | IGGQIHLAIMAVFKM       | NS2a         | 1194  | 1208 | HLA-DRB1*13:01            | 0%   | Dengue virus 4 | ELISPOT          | IFNg release | Positive            | 0                                                                                         | 0          | 0          | 0          | 0          | 0          | 0         | 0          | 0        |  |
| 539407     | IGGQTHLAIMAVFKM       | NS2a         | 1194  | 1208 | HLA-DRB1*13:01            | 0%   | Dengue virus 4 | ELISPOT          | IFNg release | Positive            | 0                                                                                         | 0          | 0          | 0          | 0          | 0          | 0         | 0          | 0        |  |
| 539433     | IRSTMPLVMAWRTIM       | NS2a         | 1280  | 1294 | HLA-DRB1*13:01            | 0%   | Dengue virus 4 | ELISPOT          | IFNg release | Positive            | 0                                                                                         | 0          | 0          | 0          | 0          | 0          | 0         | 0          | 0        |  |
| 539434     | IRSTMSLVMAWRTIM       | NS2a         | 1280  | 1294 | HLA-DRB1*13:01            | 0%   | Dengue virus 4 | ELISPOT          | IFNg release | Positive            | 0                                                                                         | 0          | 0          | 0          | 0          | 0          | 0         | 0          | 0        |  |
| 539565     | LGVFLRKLTSLRETAL      | NS2a         | 1214  | 1228 | HLA-DRB1*08:03            | 0%   | Dengue virus 4 | ELISPOT          | IFNg release | Positive            | 0                                                                                         | 0          | 0          | 0          | 0          | 0          | 0         | 0          | 0        |  |
| 539627     | LSLTFIRSTMPLVMA       | NS2a         | 1275  | 1289 | HLA-DRB1*10:01            | 0%   | Dengue virus 4 | ELISPOT          | IFNg release | Positive            | 0                                                                                         | 0          | 0          | 0          | 0          | 0          | 0         | 0          | 0        |  |
| 539628     | LSLTFIRSTPLVMA        | NS2a         | 1275  | 1289 | HLA-DRB1*08:03            | 0%   | Dengue virus 4 | ELISPOT          | IFNg release | Positive            | 0                                                                                         | 0          | 0          | 0          | 0          | 0          | 0         | 0          | 0        |  |
| 539919     | SLTFIRSTMPLVMAW       | NS2a         | 1276  | 1290 | HLA-DRB1*09:01            | 0%   | Dengue virus 4 | ELISPOT          | IFNg release | Positive            | 0                                                                                         | 0          | 0          | 0          | 0          | 0          | 0         | 0          | 0        |  |
| 539921     | SLTFIRSTPLIMAW        | NS2a         | 1276  | 1290 | HLA-DRB1*04:03            | 0%   | Dengue virus 4 | ELISPOT          | IFNg release | Positive            | 0                                                                                         | 0          | 0          | 0          | 0          | 0          | 0         | 0          | 0        |  |
| 539961     | TALMVIGMAMTTTSL       | NS2a         | 1226  | 1240 | HLA-DRB1*01:02            | 0%   | Dengue virus 4 | ELISPOT          | IFNg release | Positive            | 0                                                                                         | 0          | 0          | 0          | 0          | 0          | 0         | 0          | 0        |  |
| 540033     | VFKMSPGVYGVFLR        | NS2a         | 1205  | 1219 | HLA-DRB1*09:01            | 0%   | Dengue virus 4 | ELISPOT          | IFNg release | Positive            | 0                                                                                         | 0          | 0          | 0          | 0          | 0          | 0         | 0          | 0        |  |
| 540053     | VLGVFLRKLTSLRET       | NS2a         | 1213  | 1227 | HLA-DRB1*14:04            | 0%   | Dengue virus 4 | ELISPOT          | IFNg release | Positive            | 0                                                                                         | 0          | 0          | 0          | 0          | 0          | 0         | 0          | 0        |  |
| 738559     | AVVITLCAIILGSLT       | NS2a         | 1161  | 1175 | HLA-DRB1*01:02            | 0%   | Dengue virus 4 | ELISPOT          | IFNg release | Positive            | 0                                                                                         | 0          | 0          | 0          | 0          | 0          | 0         | 0          | 0        |  |
| 867669     | LTFIRSTPLVMAWR        | NS2a         | 1277  | 1291 | HLA-DRB3*02:02            | 0%   | Dengue virus 4 | ELISPOT          | IFNg release | Positive            | 0                                                                                         | 0          | 0          | 0          | 0          | 0          | 0         | 0          | 0        |  |
| 45689      | NRKGKIVGLYGNGV        | NS3          | 141   | 155  | HLA-DRB1*15:01            | 0%   | Dengue virus 4 | ICS              | IFNg release | Positive            | 0                                                                                         | 0          | 0          | 0          | 0          | 0          | 0         | 0          | 0        |  |
| 53505      | REGEKKLRPRWLDR        | NS3          | 585   | 599  | HLA class II              | 0%   | Dengue virus 4 | ICS              | IFNg release | Positive            | 0                                                                                         | 0          | 0          | 0          | 0          | 0          | 0         | 0          | 0        |  |
| 539020     | AAAFMTATPPGATD        | NS3          | 1783  | 1797 | HLA-DRB1*10:01            | 0%   | Dengue virus 4 | ELISPOT          | IFNg release | Positive            | 0                                                                                         | 0          | 0          | 0          | 0          | 0          | 0         | 0          | 0        |  |
| 539021     | AAAFMTATPPGSDI        | NS3          | 1783  | 1797 | HLA-DRB1*04:07            | 0%   | Dengue virus 4 | ELISPOT          | IFNg release | Positive            | 0                                                                                         | 0          | 0          | 0          | 0          | 0          | 0         | 0          | 0        |  |
| 539023     | AAAFMTATPPGTID        | NS3          | 1783  | 1797 | HLA-DRB1*04:03            | 0%   | Dengue virus 4 | ELISPOT          | IFNg release | Positive            | 0                                                                                         | 0          | 0          | 0          | 0          | 0          | 0         | 0          | 0        |  |
| 539026     | AAAFMTATPPGATDP       | NS3          | 1784  | 1798 | HLA-DRB1*09:01            | 0%   | Dengue virus 4 | ELISPOT          | IFNg release | Positive            | 0                                                                                         | 0          | 0          | 0          | 0          | 0          | 0         | 0          | 0        |  |
| 540077     | VREAIKRRRLTLVLA       | NS3          | 1682  | 1696 | HLA-DRB1*08:03            | 0%   | Dengue virus 4 | ELISPOT          | IFNg release | Positive            | 0                                                                                         | 0          | 0          | 0          | 0          | 0          | 0         | 0          | 0        |  |
| 868371     | PRWLDAVRYADPMAL       | NS3          | 2067  | 2081 | HLA-DQA1*03:01/DOB1*03:02 | 0%   | Dengue virus 4 | ELISPOT          | IFNg release | Positive            | 0                                                                                         | 0          | 0          | 0          | 0          | 0          | 0         | 0          | 0        |  |
| 195386     | GLTIAVASGLLWMA        | NS4a         | 2176  | 2190 | HLA-DRB1*07:01            | 0%   | Dengue virus 4 | ELISPOT          | IFNg release | Positive            | 0                                                                                         | 0          | 0          | 0          | 0          | 0          | 0         | 0          | 0        |  |



|         |                     |      |      |      |                           |      |                |             |              |              |   |   |   |   |   |   |   |   |   |
|---------|---------------------|------|------|------|---------------------------|------|----------------|-------------|--------------|--------------|---|---|---|---|---|---|---|---|---|
| 195551  | IYVILTILTIALVA      | NS4a | 2227 | 2241 | HLA-DRB1*01:01            | 0%   | Dengue virus 4 | ELISPOT     | IFNg release | Positive     | 0 | 0 | 0 | 0 | 0 | 0 | 0 | 0 | 0 |
| 195648  | LIYVILTITIALV       | NS4a | 2226 | 2240 | HLA-DRB1*07:01            | 0%   | Dengue virus 4 | ELISPOT     | IFNg release | Positive     | 0 | 0 | 0 | 0 | 0 | 0 | 0 | 0 | 0 |
| 195853  | QLIYVILTILAIGL      | NS4a | 2225 | 2239 | HLA-DRB1*15:02            | 0%   | Dengue virus 4 | ELISPOT     | IFNg release | Positive     | 0 | 0 | 0 | 0 | 0 | 0 | 0 | 0 | 0 |
| 196250  | YVILAILTIGLVAA      | NS4a | 2228 | 2242 | HLA-DRB1*08:02            | 0%   | Dengue virus 4 | ELISPOT     | IFNg release | Positive     | 0 | 0 | 0 | 0 | 0 | 0 | 0 | 0 | 0 |
| 196251  | YVILALLTISLIAA      | NS4a | 2228 | 2242 | HLA-DRB1*15:02            | 0%   | Dengue virus 4 | ELISPOT     | IFNg release | Positive     | 0 | 0 | 0 | 0 | 0 | 0 | 0 | 0 | 0 |
| 539666  | MGLTIIVASGLLWV      | NS4a | 2175 | 2189 | HLA-DRB1*09:01            | 0%   | Dengue virus 4 | ELISPOT     | IFNg release | Positive     | 0 | 0 | 0 | 0 | 0 | 0 | 0 | 0 | 0 |
| 867726  | LIYVILTITIIGLI      | NS4a | 2226 | 2240 | HLA-DPB1*04:02            | 0%   | Dengue virus 4 | ELISPOT     | IFNg release | Positive     | 0 | 0 | 0 | 0 | 0 | 0 | 0 | 0 | 0 |
| 195719  | LTASLAMLVHYAI       | NS4b | 2346 | 2360 | HLA-DRB1*07:01            | 0%   | Dengue virus 4 | ELISPOT     | IFNg release | Positive     | 0 | 0 | 0 | 0 | 0 | 0 | 0 | 0 | 0 |
| 196055  | TLIASLVMLLVHYAI     | NS4b | 2345 | 2359 | HLA-DRB1*01:01            | 0%   | Dengue virus 4 | ELISPOT     | IFNg release | Positive     | 0 | 0 | 0 | 0 | 0 | 0 | 0 | 0 | 0 |
| 196082  | TTIASLVMLLVHYA      | NS4b | 2344 | 2358 | HLA-DRB1*13:01            | 0%   | Dengue virus 4 | ELISPOT     | IFNg release | Positive     | 0 | 0 | 0 | 0 | 0 | 0 | 0 | 0 | 0 |
| 196209  | WAFCEVLTLATGPVL     | NS4b | 2427 | 2441 | HLA-DRB1*07:01            | 0%   | Dengue virus 4 | ELISPOT     | IFNg release | Positive     | 0 | 0 | 0 | 0 | 0 | 0 | 0 | 0 | 0 |
| 539661  | MGCSQVNPTTLIA       | NS4b | 2335 | 2349 | HLA-DRB1*09:01            | 0%   | Dengue virus 4 | ELISPOT     | IFNg release | Positive     | 0 | 0 | 0 | 0 | 0 | 0 | 0 | 0 | 0 |
| 738500  | AMGCYSQVNPNTLIA     | NS4b | 2334 | 2348 | HLA-DRB1*04:07            | 0%   | Dengue virus 4 | ELISPOT     | IFNg release | Positive     | 0 | 0 | 0 | 0 | 0 | 0 | 0 | 0 | 0 |
| 195230  | DYMPMVMKRSVPSES     | NS5  | 3369 | 3383 | HLA-DRB1*11:01            | 0%   | Dengue virus 4 | ELISPOT     | IFNg release | Positive     | 0 | 0 | 0 | 0 | 0 | 0 | 0 | 0 | 0 |
| 195593  | KTFMKDGRSLVPCR      | NS5  | 3202 | 3216 | HLA-DRB1*03:01            | 0%   | Dengue virus 4 | ELISPOT     | IFNg release | Positive     | 0 | 0 | 0 | 0 | 0 | 0 | 0 | 0 | 0 |
| 195764  | MPVMKRYSPASEEG      | NS5  | 3371 | 3385 | HLA-DRB1*08:02            | 0%   | Dengue virus 4 | ELISPOT     | IFNg release | Positive     | 0 | 0 | 0 | 0 | 0 | 0 | 0 | 0 | 0 |
| 195835  | PKPGTRMVTMTTANW     | NS5  | 2853 | 2867 | HLA-DRB1*04:01            | 0%   | Dengue virus 4 | ELISPOT     | IFNg release | Positive     | 0 | 0 | 0 | 0 | 0 | 0 | 0 | 0 | 0 |
| 195919  | RWIEDNPNMIDKTP      | NS5  | 3303 | 3317 | HLA-DRB1*03:01            | 0%   | Dengue virus 4 | ELISPOT     | IFNg release | Positive     | 0 | 0 | 0 | 0 | 0 | 0 | 0 | 0 | 0 |
| 196071  | TRMVMTTTANWLWAL     | NS5  | 2857 | 2871 | HLA-DRB1*04:01            | 0%   | Dengue virus 4 | ELISPOT     | IFNg release | Positive     | 0 | 0 | 0 | 0 | 0 | 0 | 0 | 0 | 0 |
| 196092  | TYQNKKVKVLRPTPR     | NS5  | 3059 | 3073 | HLA-DRB1*08:02            | 0%   | Dengue virus 4 | ELISPOT     | IFNg release | Positive     | 0 | 0 | 0 | 0 | 0 | 0 | 0 | 0 | 0 |
| 196106  | VDYMPVMKRYSPASE     | NS5  | 3368 | 3382 | HLA-DRB1*11:01            | 0%   | Dengue virus 4 | ELISPOT     | IFNg release | Positive     | 0 | 0 | 0 | 0 | 0 | 0 | 0 | 0 | 0 |
| 539222  | EKPDMTIIGRRLLRL     | NS5  | 2757 | 2771 | HLA-DRB1*12:02            | 0%   | Dengue virus 4 | ELISPOT     | IFNg release | Positive     | 0 | 0 | 0 | 0 | 0 | 0 | 0 | 0 | 0 |
| 539354  | GTRMVMTTTANWLWA     | NS5  | 2856 | 2870 | HLA-DRB1*04:03            | 0%   | Dengue virus 4 | ELISPOT     | IFNg release | Positive     | 0 | 0 | 0 | 0 | 0 | 0 | 0 | 0 | 0 |
| 539493  | KMLLNRFTRHRKPT      | NS5  | 2724 | 2738 | HLA-DRB1*13:01            | 0%   | Dengue virus 4 | ELISPOT     | IFNg release | Positive     | 0 | 0 | 0 | 0 | 0 | 0 | 0 | 0 | 0 |
| 539498  | KPDMTIIGRRLLRLQ     | NS5  | 2758 | 2772 | HLA-DRB1*08:03            | 0%   | Dengue virus 4 | ELISPOT     | IFNg release | Positive     | 0 | 0 | 0 | 0 | 0 | 0 | 0 | 0 | 0 |
| 539769  | PGTRMVTMTTANWLW     | NS5  | 2855 | 2869 | HLA-DRB1*04:03            | 0%   | Dengue virus 4 | ELISPOT     | IFNg release | Positive     | 0 | 0 | 0 | 0 | 0 | 0 | 0 | 0 | 0 |
| 540007  | TSKMLLNRFTRTHR      | NS5  | 2721 | 2735 | HLA-DRB1*13:01            | 0%   | Dengue virus 4 | ELISPOT     | IFNg release | Positive     | 0 | 0 | 0 | 0 | 0 | 0 | 0 | 0 | 0 |
| 867473  | KPLDERFGTSLFLN      | NS5  | 3156 | 3170 | HLA-DPB1*01:01            | 0%   | Dengue virus 4 | ELISPOT     | IFNg release | Positive     | 0 | 0 | 0 | 0 | 0 | 0 | 0 | 0 | 0 |
| 867575  | LDERFGTSLFLNDM      | NS5  | 3158 | 3172 | HLA-DPB1*04:01            | 0%   | Dengue virus 4 | ELISPOT     | IFNg release | Positive     | 0 | 0 | 0 | 0 | 0 | 0 | 0 | 0 | 0 |
| 1067635 | LKRWGQLKKNKAIKI     | C    | 65   | 79   | HLA-DRB1*07:01            | 100% | Dengue virus 4 | ELISPOT     | IFNg release | Positive-Low | 1 | 1 | 1 | 1 | 1 | 1 | 1 | 1 | 1 |
| 1068575 | VVRPPFNMLKRENR      | C    | 7    | 21   | HLA-DRB1*11:01            | 100% | Dengue virus 4 | ELISPOT     | IFNg release | Positive-Low | 1 | 1 | 1 | 1 | 1 | 1 | 1 | 1 | 1 |
| 17605   | FRKEIGRML           | C    | 83   | 91   | HLA-DPw4                  | 100% | Dengue virus 4 | 51 chromium | cytotoxicity | Positive     | 1 | 1 | 1 | 1 | 1 | 1 | 1 | 1 | 1 |
| 195316  | FNMLKRENRNVSTPQ     | C    | 12   | 26   | HLA-DRB1*04:01            | 100% | Dengue virus 4 | ELISPOT     | IFNg release | Positive     | 1 | 1 | 1 | 1 | 1 | 1 | 1 | 1 | 1 |
| 195325  | FRKEIGRMLNLNGR      | C    | 19   | 33   | HLA-DRB1*04:01            | 100% | Dengue virus 4 | ELISPOT     | IFNg release | Positive     | 1 | 1 | 1 | 1 | 1 | 1 | 1 | 1 | 1 |
| 195587  | KRWGQLKKNKAIKIL     | C    | 46   | 60   | HLA-DRB1*08:03            | 100% | Dengue virus 4 | ELISPOT     | IFNg release | Positive     | 1 | 1 | 1 | 1 | 1 | 1 | 1 | 1 | 1 |
| 195651  | LKKNKAIKITGFRK      | C    | 51   | 65   | HLA-DRB1*14:04            | 100% | Dengue virus 4 | ELISPOT     | IFNg release | Positive     | 1 | 1 | 1 | 1 | 1 | 1 | 1 | 1 | 1 |
| 195900  | RMVLAFITFLRVLSI     | C    | 44   | 58   | HLA-DRB1*11:01            | 100% | Dengue virus 4 | ELISPOT     | IFNg release | Positive     | 1 | 1 | 1 | 1 | 1 | 1 | 1 | 1 | 1 |
| 196134  | VLAFITFLRVLSIPP     | C    | 26   | 40   | HLA-DRB1*04:01            | 100% | Dengue virus 4 | ELISPOT     | IFNg release | Positive     | 1 | 1 | 1 | 1 | 1 | 1 | 1 | 1 | 1 |
| 539044  | AFITFLRVLSIPPTA     | C    | 28   | 42   | HLA-DRB1*04:03            | 100% | Dengue virus 4 | ELISPOT     | IFNg release | Positive     | 1 | 1 | 1 | 1 | 1 | 1 | 1 | 1 | 1 |
| 539255  | FITFLRVLSIPPTAG     | C    | 49   | 63   | HLA-DRB1*04:07            | 100% | Dengue virus 4 | ELISPOT     | IFNg release | Positive     | 1 | 1 | 1 | 1 | 1 | 1 | 1 | 1 | 1 |
| 539294  | GFRKEIGRMLNLING     | C    | 54   | 68   | HLA-DRB3*02:02            | 100% | Dengue virus 4 | ELISPOT     | IFNg release | Positive     | 1 | 1 | 1 | 1 | 1 | 1 | 1 | 1 | 1 |
| 539496  | KNKAIKITGFRKEI      | C    | 53   | 67   | HLA-DRB1*12:02            | 100% | Dengue virus 4 | ELISPOT     | IFNg release | Positive     | 1 | 1 | 1 | 1 | 1 | 1 | 1 | 1 | 1 |
| 539536  | LAFITFLRVLSIPTT     | C    | 27   | 41   | HLA-DRB1*12:02            | 100% | Dengue virus 4 | ELISPOT     | IFNg release | Positive     | 1 | 1 | 1 | 1 | 1 | 1 | 1 | 1 | 1 |
| 539632  | LTGFRKEIGRMLNIL     | C    | 52   | 66   | HLA-DRB3*02:02            | 100% | Dengue virus 4 | ELISPOT     | IFNg release | Positive     | 1 | 1 | 1 | 1 | 1 | 1 | 1 | 1 | 1 |
| 69367   | VLAFITFLR           | C    | 46   | 54   | HLA-DPw4                  | 100% | Dengue virus 4 | 51 chromium | cytotoxicity | Positive     | 1 | 1 | 1 | 1 | 1 | 1 | 1 | 1 | 1 |
| 739175  | IGRMLNINLGRKRST     | C    | 87   | 101  | HLA-DRB1*14:02            | 100% | Dengue virus 4 | ELISPOT     | IFNg release | Positive     | 1 | 1 | 1 | 1 | 1 | 1 | 1 | 1 | 1 |
| 740156  | RPPFNMLKRENRVRS     | C    | 9    | 23   | HLA-DRB1*14:02            | 100% | Dengue virus 4 | ELISPOT     | IFNg release | Positive     | 1 | 1 | 1 | 1 | 1 | 1 | 1 | 1 | 1 |
| 868517  | QLKKNKAIKITGFR      | C    | 42   | 56   | HLA-DQA1*01:02/QQB1*06:02 | 100% | Dengue virus 4 | ELISPOT     | IFNg release | Positive     | 1 | 1 | 1 | 1 | 1 | 1 | 1 | 1 | 1 |
| 195283  | FALLAGFMAYMIGQT     | PreM | 246  | 260  | HLA-DRB1*01:01            | 100% | Dengue virus 4 | ELISPOT     | IFNg release | Positive     | 1 | 1 | 1 | 1 | 1 | 1 | 1 | 1 | 1 |
| 195505  | ILRNPGFALLAGFMA     | PreM | 240  | 254  | HLA-DRB1*01:01            | 100% | Dengue virus 4 | ELISPOT     | IFNg release | Positive     | 1 | 1 | 1 | 1 | 1 | 1 | 1 | 1 | 1 |
| 195901  | RNPGFALLAGFMAYM     | PreM | 242  | 256  | HLA-DRB1*15:01            | 100% | Dengue virus 4 | ELISPOT     | IFNg release | Positive     | 1 | 1 | 1 | 1 | 1 | 1 | 1 | 1 | 1 |
| 539395  | IDCWCNLTSAWVMYG     | PreM | 117  | 131  | HLA-DQA1*01:02/QQB1*06:02 | 100% | Dengue virus 4 | ELISPOT     | IFNg release | Positive     | 1 | 1 | 1 | 1 | 1 | 1 | 1 | 1 | 1 |
| 869119  | TEGINKCTLIAMDGL     | PreM | 113  | 127  | HLA-DQA1*01:02/QQB1*06:02 | 100% | Dengue virus 4 | ELISPOT     | IFNg release | Positive     | 1 | 1 | 1 | 1 | 1 | 1 | 1 | 1 | 1 |
| 195202  | CIAVGGITFLFGFTV     | E    | 758  | 772  | HLA-DRB1*15:01            | 100% | Dengue virus 4 | ELISPOT     | IFNg release | Positive     | 1 | 1 | 1 | 1 | 1 | 1 | 1 | 1 | 1 |
| 195272  | ESTYRGAKRMAILGE     | E    | 682  | 696  | HLA-DRB1*15:06            | 100% | Dengue virus 4 | ELISPOT     | IFNg release | Positive     | 1 | 1 | 1 | 1 | 1 | 1 | 1 | 1 | 1 |
| 539379  | HAKRQDVTVLGSQEGAMH  | E    | 523  | 540  | HLA class II              | 100% | Dengue virus 4 | ICS         | IFNg release | Positive     | 1 | 1 | 1 | 1 | 1 | 1 | 1 | 1 | 1 |
| 539734  | NLEYTVVTVHNGDTP     | E    | 197  | 211  | HLA-DRB1*04:07            | 100% | Dengue virus 4 | ELISPOT     | IFNg release | Positive     | 1 | 1 | 1 | 1 | 1 | 1 | 1 | 1 | 1 |
| 738809  | ENLEYTVVTVHNGDT     | E    | 196  | 210  | HLA-DRB1*04:07            | 100% | Dengue virus 4 | ELISPOT     | IFNg release | Positive     | 1 | 1 | 1 | 1 | 1 | 1 | 1 | 1 | 1 |
| 738886  | FESTYRGAKRMAILG     | E    | 681  | 695  | HLA-DRB1*14:02            | 100% | Dengue virus 4 | ELISPOT     | IFNg release | Positive     | 1 | 1 | 1 | 1 | 1 | 1 | 1 | 1 | 1 |
| 741747  | MRCVGVGNRDFVEGVSGAW | E    | 280  | 299  | HLA class II              | 100% | Dengue virus 4 | ELISPOT     | IFNg release | Positive     | 1 | 1 | 1 | 1 | 1 | 1 | 1 | 1 | 1 |
| 195541  | ITALILGAQALPVYL     | NS2a | 1320 | 1334 | HLA-DRB1*01:01            | 100% | Dengue virus 4 | ELISPOT     | IFNg release | Positive     | 1 | 1 | 1 | 1 | 1 | 1 | 1 | 1 | 1 |
| 195699  | LQKQSHWVEITAILIL    | NS2a | 1311 | 1325 | HLA-DRB1*07:01            | 100% | Dengue virus 4 | ELISPOT     | IFNg release | Positive     | 1 | 1 | 1 | 1 | 1 | 1 | 1 | 1 | 1 |
| 195837  | PLVMQAWRTIMAVLFV    | NS2a | 1285 | 1299 | HLA-DRB1*01:01            | 100% | Dengue virus 4 | ELISPOT     | IFNg release | Positive     | 1 | 1 | 1 | 1 | 1 | 1 | 1 | 1 | 1 |
| 195864  | QSHWVEITAILILGAQ    | NS2a | 1314 | 1328 | HLA-DRB1*07:01            | 100% | Dengue virus 4 | ELISPOT     | IFNg release | Positive     | 1 | 1 | 1 | 1 | 1 | 1 | 1 | 1 | 1 |
| 196060  | TMPLVMQAWRTIMAVL    | NS2a | 1283 | 1297 | HLA-DRB1*03:01            | 100% | Dengue virus 4 | ELISPOT     | IFNg release | Positive     | 1 | 1 | 1 | 1 | 1 | 1 | 1 | 1 | 1 |
| 196227  | VWEITAILILGAQALP    | NS2a | 1317 | 1331 | HLA-DRB1*01:01            | 100% | Dengue virus 4 | ELISPOT     | IFNg release | Positive     | 1 | 1 | 1 | 1 | 1 | 1 | 1 | 1 | 1 |



|         |                    |      |      |      |                           |      |                |             |              |              |   |   |   |   |   |   |   |   |   |   |
|---------|--------------------|------|------|------|---------------------------|------|----------------|-------------|--------------|--------------|---|---|---|---|---|---|---|---|---|---|
| 539131  | CLRRRVTRKHMLV      | NS2a | 1148 | 1162 | HLA-DRB1*08:03            | 100% | Dengue virus 4 | ELISPOT     | IFNg release | Positive     | 1 | 1 | 1 | 1 | 1 | 1 | 1 | 1 | 1 | 1 |
| 539687  | MLPLVMAWRITMAVL    | NS2a | 1284 | 1298 | HLA-DRB1*12:02            | 100% | Dengue virus 4 | ELISPOT     | IFNg release | Positive     | 1 | 1 | 1 | 1 | 1 | 1 | 1 | 1 | 1 | 1 |
| 539937  | STPLVMAWRITMAV     | NS2a | 1282 | 1296 | HLA-DRB1*13:01            | 100% | Dengue virus 4 | ELISPOT     | IFNg release | Positive     | 1 | 1 | 1 | 1 | 1 | 1 | 1 | 1 | 1 | 1 |
| 738742  | ECLRRRVTRKHMLV     | NS2a | 1147 | 1161 | HLA-DRB1*14:02            | 100% | Dengue virus 4 | ELISPOT     | IFNg release | Positive     | 1 | 1 | 1 | 1 | 1 | 1 | 1 | 1 | 1 | 1 |
| 867110  | HWVEITALILGAQAL    | NS2a | 1316 | 1330 | HLA-DQA1*03:01/DQB1*03:02 | 100% | Dengue virus 4 | ELISPOT     | IFNg release | Positive     | 1 | 1 | 1 | 1 | 1 | 1 | 1 | 1 | 1 | 1 |
| 195511  | IMAVGLVSLGSGALL    | NS2b | 1352 | 1366 | HLA-DRB1*01:01            | 100% | Dengue virus 4 | ELISPOT     | IFNg release | Positive     | 1 | 1 | 1 | 1 | 1 | 1 | 1 | 1 | 1 | 1 |
| 195662  | LLLAAYVMSGSSADL    | NS2b | 1381 | 1395 | HLA-DRB1*04:01            | 100% | Dengue virus 4 | ELISPOT     | IFNg release | Positive     | 1 | 1 | 1 | 1 | 1 | 1 | 1 | 1 | 1 | 1 |
| 196062  | TNMITLLVKLALIV     | NS2b | 1436 | 1450 | HLA-DRB1*08:02            | 100% | Dengue virus 4 | ELISPOT     | IFNg release | Positive     | 1 | 1 | 1 | 1 | 1 | 1 | 1 | 1 | 1 | 1 |
| 869635  | VTMTLWYVMWQVKTQR   | NS2b | 1460 | 1474 | HLA-DPB1*01:01            | 100% | Dengue virus 4 | ELISPOT     | IFNg release | Positive     | 1 | 1 | 1 | 1 | 1 | 1 | 1 | 1 | 1 | 1 |
| 1067119 | GKVIGLYGNGVVTKS    | NS3  | 1618 | 1632 | HLA-DRB1*15:01            | 100% | Dengue virus 4 | ELISPOT     | IFNg release | Positive     | 1 | 1 | 1 | 1 | 1 | 1 | 1 | 1 | 1 | 1 |
| 12605   | EIVDLMCHAT         | NS3  | 255  | 264  | HLA-DPw2                  | 100% | Dengue virus 4 | 51 chromium | cytotoxicity | Positive     | 1 | 1 | 1 | 1 | 1 | 1 | 1 | 1 | 1 | 1 |
| 156711  | LAPTRVVAEMEEL      | NS3  | 1695 | 1709 | HLA class II              | 100% | Dengue virus 4 | 51 chromium | cytotoxicity | Positive     | 1 | 1 | 1 | 1 | 1 | 1 | 1 | 1 | 1 | 1 |
| 195298  | FHTMWHVTRGSVICH    | NS3  | 1520 | 1534 | HLA-DRB1*07:01            | 100% | Dengue virus 4 | ELISPOT     | IFNg release | Positive     | 1 | 1 | 1 | 1 | 1 | 1 | 1 | 1 | 1 | 1 |
| 195563  | KGKVIPLYGNGGVTK    | NS3  | 5    | 19   | HLA-DRB1*15:01            | 100% | Dengue virus 4 | ELISPOT     | IFNg release | Positive     | 1 | 1 | 1 | 1 | 1 | 1 | 1 | 1 | 1 | 1 |
| 195695  | LPVWLSYKVASAGIS    | NS3  | 2016 | 2030 | HLA-DRB1*08:02            | 100% | Dengue virus 4 | ELISPOT     | IFNg release | Positive     | 1 | 1 | 1 | 1 | 1 | 1 | 1 | 1 | 1 | 1 |
| 195838  | PNYNILVMDDEAFTD    | NS3  | 1750 | 1764 | HLA-DRB1*03:01            | 100% | Dengue virus 4 | ELISPOT     | IFNg release | Positive     | 1 | 1 | 1 | 1 | 1 | 1 | 1 | 1 | 1 | 1 |
| 33192   | KRLTIMDLHPGAGKT    | NS3  | 186  | 200  | HLA class II              | 100% | Dengue virus 4 | ICS         | IFNg release | Positive     | 1 | 1 | 1 | 1 | 1 | 1 | 1 | 1 | 1 | 1 |
| 539024  | AAAFIMTATPPGTTD    | NS3  | 1783 | 1797 | HLA-DRB1*04:03            | 100% | Dengue virus 4 | ELISPOT     | IFNg release | Positive     | 1 | 1 | 1 | 1 | 1 | 1 | 1 | 1 | 1 | 1 |
| 539080  | ALRGLPIRYQTPAVK    | NS3  | 96   | 110  | HLA-DRB1*13:01            | 100% | Dengue virus 4 | ELISPOT     | IFNg release | Positive     | 1 | 1 | 1 | 1 | 1 | 1 | 1 | 1 | 1 | 1 |
| 539359  | GVFHTMWHVTRGSVI    | NS3  | 1518 | 1532 | HLA-DRB1*08:03            | 100% | Dengue virus 4 | ELISPOT     | IFNg release | Positive     | 1 | 1 | 1 | 1 | 1 | 1 | 1 | 1 | 1 | 1 |
| 539520  | KVIGLYGNGGVTKSG    | NS3  | 7    | 21   | HLA-DRB1*15:06            | 100% | Dengue virus 4 | ELISPOT     | IFNg release | Positive     | 1 | 1 | 1 | 1 | 1 | 1 | 1 | 1 | 1 | 1 |
| 539803  | QGKTWVFPSPKAGN     | NS3  | 1829 | 1843 | HLA-DRB1*08:03            | 100% | Dengue virus 4 | ELISPOT     | IFNg release | Positive     | 1 | 1 | 1 | 1 | 1 | 1 | 1 | 1 | 1 | 1 |
| 68977   | VIGLYGNGV          | NS3  | 146  | 154  | HLA-DRB1*15:01            | 100% | Dengue virus 4 | 51 chromium | cytotoxicity | Positive     | 1 | 1 | 1 | 1 | 1 | 1 | 1 | 1 | 1 | 1 |
| 863140  | TRVEMGEAAAFIMTA    | NS3  | 1776 | 1790 | HLA-DQA1*03:01/DQB1*03:02 | 100% | Dengue virus 4 | ELISPOT     | IFNg release | Positive     | 1 | 1 | 1 | 1 | 1 | 1 | 1 | 1 | 1 | 1 |
| 867453  | KLTDWDFVVTDDISE    | NS3  | 1872 | 1886 | HLA-DQA1*03:01/DQB1*03:02 | 100% | Dengue virus 4 | ELISPOT     | IFNg release | Positive     | 1 | 1 | 1 | 1 | 1 | 1 | 1 | 1 | 1 | 1 |
| 167758  | ILTEIASLPTYLSSRAKL | NS4a | 6    | 23   | HLA-DP                    | 100% | Dengue virus 4 | ELISPOT     | IFNg release | Positive     | 1 | 1 | 1 | 1 | 1 | 1 | 1 | 1 | 1 | 1 |
| 195176  | ASLPTYLSSRAKLAL    | NS4a | 2103 | 2117 | HLA-DRB1*07:01            | 100% | Dengue virus 4 | ELISPOT     | IFNg release | Positive     | 1 | 1 | 1 | 1 | 1 | 1 | 1 | 1 | 1 | 1 |
| 195224  | DNQLIYVILTLTI      | NS4a | 2223 | 2237 | HLA-DRB1*15:01            | 100% | Dengue virus 4 | ELISPOT     | IFNg release | Positive     | 1 | 1 | 1 | 1 | 1 | 1 | 1 | 1 | 1 | 1 |
| 195809  | NQLIYVILTLITIG     | NS4a | 2224 | 2238 | HLA-DRB1*08:02            | 100% | Dengue virus 4 | ELISPOT     | IFNg release | Positive     | 1 | 1 | 1 | 1 | 1 | 1 | 1 | 1 | 1 | 1 |
| 195876  | RAKLALDNIVMLHTT    | NS4a | 2112 | 2126 | HLA-DRB1*03:01            | 100% | Dengue virus 4 | ELISPOT     | IFNg release | Positive     | 1 | 1 | 1 | 1 | 1 | 1 | 1 | 1 | 1 | 1 |
| 539165  | DILTEIASLPTYLSS    | NS4a | 2097 | 2111 | HLA-DRB1*04:07            | 100% | Dengue virus 4 | ELISPOT     | IFNg release | Positive     | 1 | 1 | 1 | 1 | 1 | 1 | 1 | 1 | 1 | 1 |
| 539313  | GKAYQHALLNELPEL    | NS4a | 2130 | 2144 | HLA-DRB1*10:01            | 100% | Dengue virus 4 | ELISPOT     | IFNg release | Positive     | 1 | 1 | 1 | 1 | 1 | 1 | 1 | 1 | 1 | 1 |
| 539631  | LTEIASLPTYLSSRA    | NS4a | 2099 | 2113 | HLA-DRB1*04:03            | 100% | Dengue virus 4 | ELISPOT     | IFNg release | Positive     | 1 | 1 | 1 | 1 | 1 | 1 | 1 | 1 | 1 | 1 |
| 738568  | AYQHALLNELPESET    | NS4a | 2132 | 2146 | HLA-DRB1*04:07            | 100% | Dengue virus 4 | ELISPOT     | IFNg release | Positive     | 1 | 1 | 1 | 1 | 1 | 1 | 1 | 1 | 1 | 1 |
| 868951  | SLPTYLSSRAKLALD    | NS4a | 2104 | 2118 | HLA-DRB3*02:02            | 100% | Dengue virus 4 | ELISPOT     | IFNg release | Positive     | 1 | 1 | 1 | 1 | 1 | 1 | 1 | 1 | 1 | 1 |
| 195177  | ASLVMLLVHYAIGP     | NS4b | 2348 | 2362 | HLA-DRB1*13:01            | 100% | Dengue virus 4 | ELISPOT     | IFNg release | Positive     | 1 | 1 | 1 | 1 | 1 | 1 | 1 | 1 | 1 | 1 |
| 195219  | DLEPISYDPKFEQL     | NS4b | 2393 | 2407 | HLA-DRB1*03:01            | 100% | Dengue virus 4 | ELISPOT     | IFNg release | Positive     | 1 | 1 | 1 | 1 | 1 | 1 | 1 | 1 | 1 | 1 |
| 195276  | ETITLDVDLRPASAW    | NS4b | 2263 | 2277 | HLA-DRB1*03:01            | 100% | Dengue virus 4 | ELISPOT     | IFNg release | Positive     | 1 | 1 | 1 | 1 | 1 | 1 | 1 | 1 | 1 | 1 |
| 195592  | KTETITLDVLRPAS     | NS4b | 2261 | 2275 | HLA-DRB1*03:01            | 100% | Dengue virus 4 | ELISPOT     | IFNg release | Positive     | 1 | 1 | 1 | 1 | 1 | 1 | 1 | 1 | 1 | 1 |
| 195616  | LCAGQLLMRTTWAF     | NS4b | 2415 | 2429 | HLA-DRB1*04:01            | 100% | Dengue virus 4 | ELISPOT     | IFNg release | Positive     | 1 | 1 | 1 | 1 | 1 | 1 | 1 | 1 | 1 | 1 |
| 195720  | LTASLVMLLVHYAI     | NS4b | 2346 | 2360 | HLA-DRB1*12:02            | 100% | Dengue virus 4 | ELISPOT     | IFNg release | Positive     | 1 | 1 | 1 | 1 | 1 | 1 | 1 | 1 | 1 | 1 |
| 196048  | TITDVLDRPASAWTL    | NS4b | 2265 | 2279 | HLA-DRB1*03:01            | 100% | Dengue virus 4 | ELISPOT     | IFNg release | Positive     | 1 | 1 | 1 | 1 | 1 | 1 | 1 | 1 | 1 | 1 |
| 196208  | WAFCEVLTATGPIL     | NS4b | 2427 | 2441 | HLA-DRB1*07:01            | 100% | Dengue virus 4 | ELISPOT     | IFNg release | Positive     | 1 | 1 | 1 | 1 | 1 | 1 | 1 | 1 | 1 | 1 |
| 196226  | WTLYAVATILTIPML    | NS4b | 2277 | 2291 | HLA-DRB1*07:01            | 100% | Dengue virus 4 | ELISPOT     | IFNg release | Positive     | 1 | 1 | 1 | 1 | 1 | 1 | 1 | 1 | 1 | 1 |
| 539057  | AGQLLMRTTWAFCE     | NS4b | 2417 | 2431 | HLA-DRB1*13:01            | 100% | Dengue virus 4 | ELISPOT     | IFNg release | Positive     | 1 | 1 | 1 | 1 | 1 | 1 | 1 | 1 | 1 | 1 |
| 539185  | DVDLRPASAWTLAYV    | NS4b | 2268 | 2282 | HLA-DRB1*09:01            | 100% | Dengue virus 4 | ELISPOT     | IFNg release | Positive     | 1 | 1 | 1 | 1 | 1 | 1 | 1 | 1 | 1 | 1 |
| 539639  | LVHYAIIIGPLQAKA    | NS4b | 2354 | 2368 | HLA-DQA1*05:01/DQB1*02:01 | 100% | Dengue virus 4 | ELISPOT     | IFNg release | Positive     | 1 | 1 | 1 | 1 | 1 | 1 | 1 | 1 | 1 | 1 |
| 739202  | ITDVLDRPASAWTLY    | NS4b | 2266 | 2280 | HLA-DRB1*01:02            | 100% | Dengue virus 4 | ELISPOT     | IFNg release | Positive     | 1 | 1 | 1 | 1 | 1 | 1 | 1 | 1 | 1 | 1 |
| 1066543 | ACL GKAYAQMWLSLMY  | NS5  | 3240 | 3254 | HLA-DRB1*04:01            | 100% | Dengue virus 4 | ELISPOT     | IFNg release | Positive-Low | 1 | 1 | 1 | 1 | 1 | 1 | 1 | 1 | 1 | 1 |
| 195235  | EEFISKVRSNAIGA     | NS5  | 2884 | 2898 | HLA-DRB1*08:02            | 100% | Dengue virus 4 | ELISPOT     | IFNg release | Positive     | 1 | 1 | 1 | 1 | 1 | 1 | 1 | 1 | 1 | 1 |
| 195240  | EEVDYMPVMKRYSA     | NS5  | 3365 | 3379 | HLA-DRB1*11:01            | 100% | Dengue virus 4 | ELISPOT     | IFNg release | Positive     | 1 | 1 | 1 | 1 | 1 | 1 | 1 | 1 | 1 | 1 |
| 195279  | EVVDYMPVMKRYSP     | NS5  | 3366 | 3380 | HLA-DRB1*11:01            | 100% | Dengue virus 4 | ELISPOT     | IFNg release | Positive     | 1 | 1 | 1 | 1 | 1 | 1 | 1 | 1 | 1 | 1 |
| 195737  | LCWGSILIGLSRATW    | NS5  | 3333 | 3347 | HLA-DRB1*11:01            | 100% | Dengue virus 4 | ELISPOT     | IFNg release | Positive     | 1 | 1 | 1 | 1 | 1 | 1 | 1 | 1 | 1 | 1 |
| 195815  | NRVWIEDNPNMMDKT    | NS5  | 3302 | 3316 | HLA-DRB1*03:01            | 100% | Dengue virus 4 | ELISPOT     | IFNg release | Positive     | 1 | 1 | 1 | 1 | 1 | 1 | 1 | 1 | 1 | 1 |
| 195823  | NWLWALLGKKKNPLR    | NS5  | 2866 | 2880 | HLA-DRB1*14:02            | 100% | Dengue virus 4 | ELISPOT     | IFNg release | Positive     | 1 | 1 | 1 | 1 | 1 | 1 | 1 | 1 | 1 | 1 |
| 195858  | QMWSLMYFHRDLRL     | NS5  | 3248 | 3262 | HLA-DRB1*15:01            | 100% | Dengue virus 4 | ELISPOT     | IFNg release | Positive     | 1 | 1 | 1 | 1 | 1 | 1 | 1 | 1 | 1 | 1 |
| 195879  | REFISKVRSNAIGA     | NS5  | 2883 | 2897 | HLA-DRB1*04:01            | 100% | Dengue virus 4 | ELISPOT     | IFNg release | Positive     | 1 | 1 | 1 | 1 | 1 | 1 | 1 | 1 | 1 | 1 |
| 196105  | VDYMPVMKRYSAFFE    | NS5  | 3368 | 3382 | HLA-DRB1*11:01            | 100% | Dengue virus 4 | ELISPOT     | IFNg release | Positive     | 1 | 1 | 1 | 1 | 1 | 1 | 1 | 1 | 1 | 1 |
| 196230  | YAQMWSLMYFHRDL     | NS5  | 3246 | 3260 | HLA-DRB1*15:01            | 100% | Dengue virus 4 | ELISPOT     | IFNg release | Positive     | 1 | 1 | 1 | 1 | 1 | 1 | 1 | 1 | 1 | 1 |
| 539251  | FEFYKRSGLIEVDRT    | NS5  | 2512 | 2526 | HLA-DRB1*09:01            | 100% | Dengue virus 4 | ELISPOT     | IFNg release | Positive     | 1 | 1 | 1 | 1 | 1 | 1 | 1 | 1 | 1 | 1 |
| 539553  | LGEFGRAKSGRAIWT    | NS5  | 2949 | 2963 | HLA-DRB1*09:01            | 100% | Dengue virus 4 | ELISPOT     | IFNg release | Positive     | 1 | 1 | 1 | 1 | 1 | 1 | 1 | 1 | 1 | 1 |
| 539656  | MAISGDDCVKPLDERF   | NS5  | 3146 | 3162 | HLA class II              | 100% | Dengue virus 4 | ICS         | IFNg release | Positive     | 1 | 1 | 1 | 1 | 1 | 1 | 1 | 1 | 1 | 1 |
| 539703  | MVTQLAMTDTPFGQQR   | NS5  | 2824 | 2840 | HLA class II              | 100% | Dengue virus 4 | ICS         | IFNg release | Positive     | 1 | 1 | 1 | 1 | 1 | 1 | 1 | 1 | 1 | 1 |
| 539770  | PHHKILAKAIFKLT     | NS5  | 3046 | 3060 | HLA-DRB1*12:02            | 100% | Dengue virus 4 | ELISPOT     | IFNg release | Positive     | 1 | 1 | 1 | 1 | 1 | 1 | 1 | 1 | 1 | 1 |
| 540041  | VTGYLNTFTNMEVQ     | NS5  | 3091 | 3105 | HLA-DRB1*15:06            | 100% | Dengue virus 4 | ELISPOT     | IFNg release | Positive     | 1 | 1 | 1 | 1 | 1 | 1 | 1 | 1 | 1 | 1 |
| 866633  | ESCYNMIMGKREKLL    | NS5  | 2935 | 2949 | HLA-DRB5*01:01            | 100% | Dengue virus 4 | ELISPOT     | IFNg release | Positive     | 1 | 1 | 1 | 1 | 1 | 1 | 1 | 1 | 1 | 1 |



|         |                  |      |      |      |                           |             |                |                     |              |          |   |   |   |   |   |   |   |   |   |
|---------|------------------|------|------|------|---------------------------|-------------|----------------|---------------------|--------------|----------|---|---|---|---|---|---|---|---|---|
| 868638  | RDRLASMAICSAVP   | NS5  | 3258 | 3272 | HLA-DQA1*01:02/DQB1*06:02 | 100%        | Dengue virus 4 | ELISPOT             | IFNg release | Positive | 1 | 1 | 1 | 1 | 1 | 1 | 1 | 1 | 1 |
| 539898  | SGKGPLRMVLAFITF  | C    | 18   | 32   | HLA-DRB1*15:06            | 81% - <100% | Dengue virus 4 | ELISPOT             | IFNg release | Positive | 1 | 1 | 1 | 1 | 1 | 1 | 0 | 1 | 1 |
| 739059  | GRMLNINLGRKRSTI  | C    | 88   | 102  | HLA-DRB1*14:06            | 81% - <100% | Dengue virus 4 | ELISPOT             | IFNg release | Positive | 1 | 1 | 1 | 1 | 1 | 1 | 0 | 1 | 1 |
| 539463  | KERMVTFKVPVHAKRQ | E    | 513  | 527  | HLA-DRB1*04:03            | 81% - <100% | Dengue virus 4 | ELISPOT             | IFNg release | Positive | 1 | 1 | 1 | 1 | 0 | 1 | 1 | 1 | 1 |
| 540080  | VRILGFLVLWIGTN   | E    | 455  | 469  | HLA-DRB1*15:06            | 81% - <100% | Dengue virus 4 | ELISPOT             | IFNg release | Positive | 1 | 1 | 1 | 1 | 1 | 0 | 1 | 1 | 1 |
| 195822  | NVMWVKQITNELNYVL | NS1  | 1    | 15   | HLA-DRB1*04:07            | 81% - <100% | Dengue virus 4 | ELISPOT             | IFNg release | Positive | 1 | 1 | 1 | 1 | 1 | 1 | 0 | 1 | 1 |
| 867043  | HADMGYWIESSKNQT  | NS1  | 969  | 983  | HLA-DQA1*01:01/DQB1*05:01 | 81% - <100% | Dengue virus 4 | ELISPOT             | IFNg release | Positive | 1 | 1 | 1 | 1 | 1 | 1 | 0 | 1 | 1 |
| 195571  | KHMLVVVVITLCAI   | NS2a | 1156 | 1170 | HLA-DRB1*08:02            | 81% - <100% | Dengue virus 4 | ELISPOT             | IFNg release | Positive | 1 | 1 | 1 | 1 | 0 | 1 | 1 | 1 | 1 |
| 195404  | GLVSLGSLALKNDV   | NS2b | 9    | 23   | HLA-DRB1*01:02            | 81% - <100% | Dengue virus 4 | ELISPOT             | IFNg release | Positive | 1 | 1 | 1 | 1 | 1 | 1 | 0 | 1 | 1 |
| 195748  | MAVGLVSLGSLALK   | NS2b | 1353 | 1367 | HLA-DRB1*01:01            | 81% - <100% | Dengue virus 4 | ELISPOT             | IFNg release | Positive | 1 | 1 | 1 | 1 | 1 | 1 | 0 | 1 | 1 |
| 195931  | SALLKNDVPLAGPMV  | NS2b | 1363 | 1377 | HLA-DRB1*03:01            | 81% - <100% | Dengue virus 4 | ELISPOT             | IFNg release | Positive | 1 | 1 | 1 | 1 | 1 | 1 | 0 | 1 | 1 |
| 539101  | AVGLVSLGSLALKN   | NS2b | 1354 | 1368 | HLA-DRB1*10:01            | 81% - <100% | Dengue virus 4 | ELISPOT             | IFNg release | Positive | 1 | 1 | 1 | 1 | 1 | 1 | 0 | 1 | 1 |
| 1392192 | GREIVDLMCATFTT   | NS3  | 1727 | 1741 |                           | 81% - <100% | Dengue virus 4 | biological activity | activation   | Positive | 1 | 1 | 1 | 1 | 1 | 1 | 0 | 1 | 1 |
| 195244  | EGVYRIMQRGLFGKT  | NS3  | 1494 | 1508 | HLA-DRB1*11:01            | 81% - <100% | Dengue virus 4 | ELISPOT             | IFNg release | Positive | 1 | 1 | 1 | 1 | 1 | 1 | 0 | 1 | 1 |
| 195353  | GEIGAVTLDFKPGTS  | NS3  | 1595 | 1609 | HLA-DRB1*03:01            | 81% - <100% | Dengue virus 4 | ELISPOT             | IFNg release | Positive | 1 | 1 | 1 | 1 | 0 | 1 | 1 | 1 | 1 |
| 196032  | TEGVYRIMQRGLFGK  | NS3  | 146  | 160  | HLA-DRB1*11:01            | 81% - <100% | Dengue virus 4 | ELISPOT             | IFNg release | Positive | 1 | 1 | 1 | 1 | 1 | 1 | 0 | 1 | 1 |
| 539547  | LFKLTLTGEIGAVTLD | NS3  | 1589 | 1603 | HLA-DRB1*10:01            | 81% - <100% | Dengue virus 4 | ELISPOT             | IFNg release | Positive | 1 | 1 | 1 | 1 | 0 | 1 | 1 | 1 | 1 |
| 739767  | PLGFKLTGTGEIGAVT | NS3  | 1587 | 1601 | HLA-DRB1*10:01            | 81% - <100% | Dengue virus 4 | ELISPOT             | IFNg release | Positive | 1 | 1 | 1 | 1 | 0 | 1 | 1 | 1 | 1 |
| 739036  | GLPIRYQTPAVKSEH  | NS3  | 1711 | 1725 | HLA-DRB1*14:06            | 81% - <100% | Dengue virus 4 | ELISPOT             | IFNg release | Positive | 1 | 1 | 0 | 1 | 1 | 1 | 1 | 1 | 1 |
| 739563  | LRGLPIRYQTPAVKS  | NS3  | 1709 | 1723 | HLA-DRB1*14:06            | 81% - <100% | Dengue virus 4 | ELISPOT             | IFNg release | Positive | 1 | 1 | 0 | 1 | 1 | 1 | 1 | 1 | 1 |
| 195274  | ETLMLVALLGAMTAG  | NS4a | 2145 | 2159 | HLA-DRB1*08:02            | 81% - <100% | Dengue virus 4 | ELISPOT             | IFNg release | Positive | 1 | 1 | 1 | 0 | 1 | 1 | 1 | 1 | 1 |
| 195575  | KLSMGLIAIAVASGL  | NS4a | 2172 | 2186 | HLA-DRB1*08:02            | 81% - <100% | Dengue virus 4 | ELISPOT             | IFNg release | Positive | 1 | 1 | 1 | 1 | 0 | 1 | 1 | 1 | 1 |
| 196058  | TLMLVALLGAMTAGI  | NS4a | 2146 | 2160 | HLA-DRB1*01:01            | 81% - <100% | Dengue virus 4 | ELISPOT             | IFNg release | Positive | 1 | 1 | 1 | 0 | 1 | 1 | 1 | 1 | 1 |
| 539638  | LVALLGAMTAGIFLF  | NS4a | 2149 | 2163 | HLA-DRB1*09:01            | 81% - <100% | Dengue virus 4 | ELISPOT             | IFNg release | Positive | 1 | 1 | 1 | 0 | 1 | 1 | 1 | 1 | 1 |
| 539584  | LLAMGCYSQVNPPTL  | NS4b | 2332 | 2346 | HLA-DRB1*09:01            | 81% - <100% | Dengue virus 4 | ELISPOT             | IFNg release | Positive | 1 | 1 | 1 | 1 | 0 | 1 | 1 | 1 | 1 |
| 867009  | GRFWNTTIAVSTANI  | NS4b | 2449 | 2463 | HLA-DQA1*01:02/DQB1*06:02 | 81% - <100% | Dengue virus 4 | ELISPOT             | IFNg release | Positive | 1 | 1 | 1 | 1 | 1 | 1 | 0 | 1 | 1 |
| 195454  | HHFKIFMKDGRSLV   | NS5  | 3199 | 3213 | HLA-DRB1*03:01            | 81% - <100% | Dengue virus 4 | ELISPOT             | IFNg release | Positive | 1 | 1 | 1 | 1 | 1 | 1 | 0 | 1 | 1 |
| 195499  | ILAKAIFKLTQYQNV  | NS5  | 3050 | 3064 | HLA-DRB1*07:01            | 81% - <100% | Dengue virus 4 | ELISPOT             | IFNg release | Positive | 1 | 1 | 1 | 1 | 0 | 1 | 1 | 1 | 1 |
| 539149  | DCVVKPLDERFSTSLF | NS5  | 3152 | 3168 | HLA class II              | 81% - <100% | Dengue virus 4 | ICS                 | IFNg release | Positive | 1 | 1 | 1 | 1 | 0 | 1 | 1 | 1 | 1 |
| 539456  | KAIFKLTQYQNVVKV  | NS5  | 3053 | 3067 | HLA-DRB1*09:01            | 81% - <100% | Dengue virus 4 | ELISPOT             | IFNg release | Positive | 1 | 1 | 1 | 1 | 0 | 1 | 1 | 1 | 1 |
| 739405  | KVRSNAAIGAVFQEE  | NS5  | 2889 | 2903 | HLA-DRB1*01:02            | 81% - <100% | Dengue virus 4 | ELISPOT             | IFNg release | Positive | 1 | 1 | 1 | 0 | 1 | 1 | 1 | 1 | 1 |
| 866364  | DERFSTSLFLNDMG   | NS5  | 3159 | 3173 | HLA-DPB1*01:01            | 81% - <100% | Dengue virus 4 | ELISPOT             | IFNg release | Positive | 1 | 1 | 1 | 1 | 0 | 1 | 1 | 1 | 1 |
| 867070  | HKIFMKDGRSLVVP   | NS5  | 3202 | 3216 | HLA-DRB3*02:02            | 81% - <100% | Dengue virus 4 | ELISPOT             | IFNg release | Positive | 1 | 1 | 1 | 1 | 1 | 1 | 0 | 1 | 1 |
| 867315  | ISKVRSNAAIGAVFQ  | NS5  | 2887 | 2901 | HLA-DRB3*02:02            | 81% - <100% | Dengue virus 4 | ELISPOT             | IFNg release | Positive | 1 | 1 | 1 | 0 | 1 | 1 | 1 | 1 | 1 |
| 867411  | KILAKAIFKLTQYQNK | NS5  | 3049 | 3063 | HLA-DPB1*04:02            | 81% - <100% | Dengue virus 4 | ELISPOT             | IFNg release | Positive | 1 | 1 | 1 | 1 | 0 | 1 | 1 | 1 | 1 |
| 195436  | GVSWMVRILGFLVQ   | E    | 450  | 464  | HLA-DRB1*08:02            | 51%-80%     | Dengue virus 4 | ELISPOT             | IFNg release | Positive | 1 | 1 | 1 | 1 | 1 | 0 | 0 | 1 | 1 |
| 195473  | IAVGGITLFLGFTVQ  | E    | 759  | 773  | HLA-DRB1*15:01            | 51%-80%     | Dengue virus 4 | ELISPOT             | IFNg release | Positive | 1 | 1 | 1 | 1 | 0 | 0 | 1 | 0 | 1 |
| 540051  | VLGSQEGAMHSALAGA | E    | 531  | 546  | HLA class II              | 51%-80%     | Dengue virus 4 | ICS                 | IFNg release | Positive | 1 | 1 | 1 | 0 | 0 | 1 | 1 | 0 | 1 |
| 195608  | LAIMAVFKMSPGVVL  | NS2a | 1200 | 1214 | HLA-DRB1*13:01            | 51%-80%     | Dengue virus 4 | ELISPOT             | IFNg release | Positive | 1 | 0 | 1 | 1 | 1 | 0 | 0 | 1 | 0 |
| 539664  | MGGQIHAIAMAVFKM  | NS2a | 1194 | 1208 | HLA-DRB1*13:01            | 51%-80%     | Dengue virus 4 | ELISPOT             | IFNg release | Positive | 1 | 0 | 1 | 1 | 1 | 0 | 0 | 1 | 0 |
| 539930  | SRETALMVGIMAMIT  | NS2a | 1223 | 1237 | HLA-DRB1*15:06            | 51%-80%     | Dengue virus 4 | ELISPOT             | IFNg release | Positive | 1 | 0 | 1 | 1 | 1 | 1 | 0 | 1 | 0 |
| 539962  | TALMVIGMAMTTVLS  | NS2a | 1226 | 1240 | HLA-DRB1*15:06            | 51%-80%     | Dengue virus 4 | ELISPOT             | IFNg release | Positive | 1 | 0 | 1 | 1 | 1 | 1 | 0 | 1 | 0 |
| 867874  | LMVIGMAMTTVLSIP  | NS2a | 1228 | 1242 | HLA-DQA1*01:02/DQB1*06:02 | 51%-80%     | Dengue virus 4 | ELISPOT             | IFNg release | Positive | 1 | 0 | 1 | 1 | 1 | 0 | 0 | 1 | 0 |
| 195962  | SIVREALKRRLRTL   | NS3  | 1680 | 1694 | HLA-DRB1*11:01            | 51%-80%     | Dengue virus 4 | ELISPOT             | IFNg release | Positive | 1 | 1 | 1 | 1 | 1 | 1 | 0 | 0 | 1 |
| 539859  | RKSGKKVIQLSRKTF  | NS3  | 1850 | 1864 | HLA-DRB1*08:03            | 51%-80%     | Dengue virus 4 | ELISPOT             | IFNg release | Positive | 1 | 1 | 1 | 1 | 0 | 0 | 1 | 1 | 1 |
| 539899  | SGKKVIQLSRKTFDT  | NS3  | 1852 | 1866 | HLA-DRB1*12:02            | 51%-80%     | Dengue virus 4 | ELISPOT             | IFNg release | Positive | 1 | 1 | 1 | 1 | 0 | 0 | 1 | 1 | 1 |
| 195214  | DFGIFYQVKTETITLD | NS4b | 2254 | 2268 | HLA-DRB1*04:01            | 51%-80%     | Dengue virus 4 | ELISPOT             | IFNg release | Positive | 1 | 1 | 1 | 1 | 0 | 1 | 1 | 1 | 1 |
| 195383  | GLAFSLIKNAQTPRR  | NS4b | 2473 | 2487 | HLA-DRB1*04:01            | 51%-80%     | Dengue virus 4 | ELISPOT             | IFNg release | Positive | 0 | 1 | 1 | 1 | 0 | 0 | 1 | 1 | 1 |
| 196052  | TKTDFGIFYQVKTET  | NS4b | 2251 | 2265 | HLA-DRB1*04:01            | 51%-80%     | Dengue virus 4 | ELISPOT             | IFNg release | Positive | 1 | 1 | 1 | 0 | 1 | 1 | 0 | 0 | 1 |
| 738447  | AFSLIKNAQTPRRGT  | NS4b | 2475 | 2489 | HLA-DRB1*14:06            | 51%-80%     | Dengue virus 4 | ELISPOT             | IFNg release | Positive | 0 | 1 | 1 | 1 | 0 | 0 | 1 | 1 | 1 |
| 738897  | FGFYQVKTETITLDV  | NS4b | 2255 | 2269 | HLA-DRB1*04:07            | 51%-80%     | Dengue virus 4 | ELISPOT             | IFNg release | Positive | 1 | 1 | 1 | 1 | 0 | 1 | 1 | 1 | 1 |
| 739417  | LAFSLIKNAQTPRRG  | NS4b | 2474 | 2488 | HLA-DRB1*14:02            | 51%-80%     | Dengue virus 4 | ELISPOT             | IFNg release | Positive | 0 | 1 | 1 | 1 | 0 | 0 | 1 | 1 | 1 |
| 195411  | GNIVSSVNTTSKMLL  | NS5  | 2713 | 2727 | HLA-DRB1*04:01            | 51%-80%     | Dengue virus 4 | ELISPOT             | IFNg release | Positive | 1 | 1 | 1 | 1 | 0 | 1 | 1 | 0 | 1 |
| 539987  | TLCLLIPTVMAHFLS  | C    | 103  | 117  | HLA-DRB1*04:03            | >0% - 50%   | Dengue virus 4 | ELISPOT             | IFNg release | Positive | 1 | 0 | 0 | 1 | 1 | 1 | 0 | 1 | 0 |
| 195526  | IQRTVFFILMMLVAP  | PreM | 262  | 276  | HLA-DRB1*07:01            | >0% - 50%   | Dengue virus 4 | ELISPOT             | IFNg release | Positive | 0 | 0 | 0 | 1 | 1 | 1 | 0 | 1 | 0 |
| 539820  | QRTVFFILMMLVAPS  | PreM | 263  | 277  | HLA-DRB1*13:01            | >0% - 50%   | Dengue virus 4 | ELISPOT             | IFNg release | Positive | 0 | 0 | 0 | 1 | 1 | 1 | 0 | 1 | 0 |
| 867174  | IGQGTGIQRTVFILM  | PreM | 257  | 271  | HLA-DPB1*02:01            | >0% - 50%   | Dengue virus 4 | ELISPOT             | IFNg release | Positive | 0 | 0 | 0 | 1 | 1 | 1 | 0 | 1 | 0 |
| 195358  | GGLFTSLGKAVHQVF  | E    | 705  | 719  | HLA-DRB1*11:01            | >0% - 50%   | Dengue virus 4 | ELISPOT             | IFNg release | Positive | 0 | 0 | 0 | 0 | 0 | 0 | 1 | 1 | 0 |
| 195472  | IAVGGITLFLGFTVH  | E    | 480  | 494  | HLA-DRB1*15:01            | >0% - 50%   | Dengue virus 4 | ELISPOT             | IFNg release | Positive | 0 | 0 | 0 | 1 | 1 | 1 | 0 | 1 | 0 |
| 539298  | GGVSWMVRILIGLLV  | E    | 449  | 463  | HLA-DRB1*15:06            | >0% - 50%   | Dengue virus 4 | ELISPOT             | IFNg release | Positive | 0 | 0 | 0 | 0 | 0 | 1 | 0 | 0 | 0 |
| 540036  | VGGLFTSLGKAVHQV  | E    | 704  | 718  | HLA-DRB1*09:01            | >0% - 50%   | Dengue virus 4 | ELISPOT             | IFNg release | Positive | 0 | 0 | 0 | 0 | 0 | 0 | 1 | 1 | 0 |
| 866696  | FGMFTTNIMWMKFREG | NS1  | 934  | 948  | HLA-DPB1*04:01            | >0% - 50%   | Dengue virus 4 | ELISPOT             | IFNg release | Positive | 0 | 0 | 0 | 1 | 1 | 1 | 0 | 1 | 0 |
| 195220  | DLMEFIDIGSLGUIL  | NS2a | 1244 | 1258 | HLA-DRB1*07:01            | >0% - 50%   | Dengue virus 4 | ELISPOT             | IFNg release | Positive | 0 | 1 | 1 | 0 | 0 | 0 | 0 | 0 | 0 |
| 196252  | YVLGIFLRKLTSTRET | NS2a | 1212 | 1226 | HLA-DRB1*11:01            | >0% - 50%   | Dengue virus 4 | ELISPOT             | IFNg release | Positive | 1 | 0 | 0 | 1 | 1 | 1 | 0 | 1 | 0 |
| 539555  | LGIFLRKLTSTRETAL | NS2a | 1214 | 1228 | HLA-DRB1*08:03            | >0% - 50%   | Dengue virus 4 | ELISPOT             | IFNg release | Positive | 1 | 0 | 0 | 1 | 1 | 1 | 0 | 1 | 0 |
| 740701  | VVTLIPLCRTSCLQK  | NS2a | 1299 | 1313 | HLA-DRB1*11:04            | >0% - 50%   | Dengue virus 4 | ELISPOT             | IFNg release | Positive | 0 | 0 | 0 | 1 | 1 | 1 | 0 | 1 | 0 |







### CD8 DENV-1 Epitopes

| NCBI (ID# DQ45136) circulating strains from India, 100% identity=1,green =else,0,red |                 |              |       |      |             |      |                |                    |                     |                     |           |            |             |             |             |             |             |             |             |             |             |             |             |             |             |             |             |             |             |             |             |             |             |
|--------------------------------------------------------------------------------------|-----------------|--------------|-------|------|-------------|------|----------------|--------------------|---------------------|---------------------|-----------|------------|-------------|-------------|-------------|-------------|-------------|-------------|-------------|-------------|-------------|-------------|-------------|-------------|-------------|-------------|-------------|-------------|-------------|-------------|-------------|-------------|-------------|
| Accession                                                                            | AA Seq          | Protein Name | Start | End  | Allele      | step | Serotype       | Method/Technique   | Assay Group         | Qualitative Measure | UBH3847.1 | AS049619.1 | 1A02F0118.1 | 1A0C57581.1 | 1C0C25006.1 | 1C2C25005.1 | 1C0C25004.1 | 1C2C25002.1 | 1C2C25000.1 | 1C2C24998.1 | 1C2C24995.1 | 1C2C24994.1 | 1A06F4940.1 | 1A06F4941.1 | 1A06F4942.1 | 1A06F4943.1 | 1A0424337.1 | 1A0420223.1 | 1A0420214.1 | 1C2C20685.1 | 1A0X75606.1 | 1A0X75609.1 | 1A0X49618.1 |
| 184844                                                                               | MILKERVIR       | N3           | 15    | 23   | HLA-B*08:01 | 0%   | Dengue virus 1 | ELISPOT            | IFN-g release       | Positive            | 0         | 0          | 0           | 0           | 0           | 0           | 0           | 0           | 0           | 0           | 0           | 0           | 0           | 0           | 0           | 0           | 0           | 0           | 0           | 0           | 0           | 0           | 0           |
| 184845                                                                               | MILKERVIR       | N3           | 24    | 32   | HLA-A*02:01 | 0%   | Dengue virus 1 | ELISPOT            | IFN-g release       | Positive            | 0         | 0          | 0           | 0           | 0           | 0           | 0           | 0           | 0           | 0           | 0           | 0           | 0           | 0           | 0           | 0           | 0           | 0           | 0           | 0           | 0           | 0           | 0           |
| 186081                                                                               | MALSVLFL        | N52a         | 1297  | 1305 | HLA-B*51:01 | 0%   | Dengue virus 1 | ELISPOT            | IFN-g release       | Positive            | 0         | 0          | 0           | 0           | 0           | 0           | 0           | 0           | 0           | 0           | 0           | 0           | 0           | 0           | 0           | 0           | 0           | 0           | 0           | 0           | 0           | 0           | 0           |
| 419307                                                                               | RPMAWGLFL       | N52a         | 1211  | 1220 | HLA-B*35:01 | 0%   | Dengue virus 1 | ELISPOT            | IFN-g release       | Positive            | 0         | 0          | 0           | 0           | 0           | 0           | 0           | 0           | 0           | 0           | 0           | 0           | 0           | 0           | 0           | 0           | 0           | 0           | 0           | 0           | 0           | 0           | 0           |
| 150254                                                                               | GPVVGSLAL       | N62a         | 1275  | 1283 | HLA-B*07:02 | 0%   | Dengue virus 1 | ELISPOT            | IFN-g release       | Positive            | 0         | 0          | 0           | 0           | 0           | 0           | 0           | 0           | 0           | 0           | 0           | 0           | 0           | 0           | 0           | 0           | 0           | 0           | 0           | 0           | 0           | 0           | 0           |
| 180682                                                                               | NIKEEDDF        | N53          | 1650  | 1658 | HLA-B*35:01 | 0%   | Dengue virus 1 | ELISPOT            | IFN-g release       | Positive            | 0         | 0          | 0           | 0           | 0           | 0           | 0           | 0           | 0           | 0           | 0           | 0           | 0           | 0           | 0           | 0           | 0           | 0           | 0           | 0           | 0           | 0           | 0           |
| 32347                                                                                | KILRTLAPFIRNVAS | N53          | 216   | 230  | HLA class I | 0%   | Dengue virus 1 | ELISPOT            | IFN-g release       | Positive            | 0         | 0          | 0           | 0           | 0           | 0           | 0           | 0           | 0           | 0           | 0           | 0           | 0           | 0           | 0           | 0           | 0           | 0           | 0           | 0           | 0           | 0           | 0           |
| 539758                                                                               | KILRTLAPFIRNVAS | N53          | 1680  | 1708 | HLA class I | 0%   | Dengue virus 1 | ELISPOT            | IFN-g release       | Positive            | 0         | 0          | 0           | 0           | 0           | 0           | 0           | 0           | 0           | 0           | 0           | 0           | 0           | 0           | 0           | 0           | 0           | 0           | 0           | 0           | 0           | 0           | 0           |
| 32347                                                                                | TPGIGFSM        | N53          | 1975  | 1981 | HLA-B*53:01 | 0%   | Dengue virus 1 | 51 chromium        | cytotoxicity        | Positive            | 0         | 0          | 0           | 0           | 0           | 0           | 0           | 0           | 0           | 0           | 0           | 0           | 0           | 0           | 0           | 0           | 0           | 0           | 0           | 0           | 0           | 0           | 0           |
| 150674                                                                               | TWMDIHR         | N55          | 3080  | 3088 | HLA-A*11:01 | 0%   | Dengue virus 1 | multimer/heteramer | qualitative binding | Positive            | 0         | 0          | 0           | 0           | 0           | 0           | 0           | 0           | 0           | 0           | 0           | 0           | 0           | 0           | 0           | 0           | 0           | 0           | 0           | 0           | 0           | 0           | 0           |
| 1803787                                                                              | MICQLVWQK       | N53          | 1207  | 1215 | HLA-B*40:01 | 0%   | Dengue virus 1 | ELISPOT            | IFN-g release       | Positive            | 0         | 0          | 0           | 0           | 0           | 0           | 0           | 0           | 0           | 0           | 0           | 0           | 0           | 0           | 0           | 0           | 0           | 0           | 0           | 0           | 0           | 0           | 0           |
| 150674                                                                               | LMVLVPSM        | PreM         | 271   | 279  | HLA-B*08:01 | 100% | Dengue virus 1 | ELISPOT            | IFN-g release       | Positive            | 1         | 1          | 1           | 1           | 1           | 1           | 1           | 1           | 1           | 1           | 1           | 1           | 1           | 1           | 1           | 1           | 1           | 1           | 1           | 1           | 1           | 1           | 1           |
| 183931                                                                               | TEVTPAVL        | E            | 329   | 337  | HLA-B*40:01 | 100% | Dengue virus 1 | ELISPOT            | IFN-g release       | Positive            | 1         | 1          | 1           | 1           | 1           | 1           | 1           | 1           | 1           | 1           | 1           | 1           | 1           | 1           | 1           | 1           | 1           | 1           | 1           | 1           | 1           | 1           | 1           |
| 183931                                                                               | YKLVKPVVY       | E            | 421   | 421  | HLA-B*40:01 | 100% | Dengue virus 1 | ELISPOT            | IFN-g release       | Positive            | 1         | 1          | 1           | 1           | 1           | 1           | 1           | 1           | 1           | 1           | 1           | 1           | 1           | 1           | 1           | 1           | 1           | 1           | 1           | 1           | 1           | 1           | 1           |
| 183931                                                                               | QEGAMITL        | E            | 536   | 544  | HLA-A*02:01 | 100% | Dengue virus 1 | ELISPOT            | IFN-g release       | Positive            | 1         | 1          | 1           | 1           | 1           | 1           | 1           | 1           | 1           | 1           | 1           | 1           | 1           | 1           | 1           | 1           | 1           | 1           | 1           | 1           | 1           | 1           | 1           |
| 150254                                                                               | GPVHGLGEL       | N51          | 104   | 105  | HLA-B*07:02 | 100% | Dengue virus 1 | ELISPOT            | IFN-g release       | Positive            | 1         | 1          | 1           | 1           | 1           | 1           | 1           | 1           | 1           | 1           | 1           | 1           | 1           | 1           | 1           | 1           | 1           | 1           | 1           | 1           | 1           | 1           | 1           |
| 183931                                                                               | TRFTRVLEL       | N52a         | 1220  | 1225 | HLA-B*08:01 | 0%   | Dengue virus 1 | ELISPOT            | IFN-g release       | Positive            | 1         | 1          | 1           | 1           | 1           | 1           | 1           | 1           | 1           | 1           | 1           | 1           | 1           | 1           | 1           | 1           | 1           | 1           | 1           | 1           | 1           | 1           | 1           |
| 183931                                                                               | LALAMATVIR      | N52a         | 1402  | 1410 | HLA-B*51:01 | 100% | Dengue virus 1 | ELISPOT            | IFN-g release       | Positive            | 1         | 1          | 1           | 1           | 1           | 1           | 1           | 1           | 1           | 1           | 1           | 1           | 1           | 1           | 1           | 1           | 1           | 1           | 1           | 1           | 1           | 1           | 1           |
| 183931                                                                               | MLMTLGLTA       | N52a         | 1318  | 1367 | HLA-B*35:01 | 0%   | Dengue virus 1 | ELISPOT            | IFN-g release       | Positive            | 1         | 1          | 1           | 1           | 1           | 1           | 1           | 1           | 1           | 1           | 1           | 1           | 1           | 1           | 1           | 1           | 1           | 1           | 1           | 1           | 1           | 1           | 1           |
| 183931                                                                               | EMALGLKMPHFVET  | N53          | 211   | 245  | HLA class I | 100% | Dengue virus 1 | ELISPOT            | IFN-g release       | Positive            | 1         | 1          | 1           | 1           | 1           | 1           | 1           | 1           | 1           | 1           | 1           | 1           | 1           | 1           | 1           | 1           | 1           | 1           | 1           | 1           | 1           | 1           | 1           |
| 183931                                                                               | EPVITGSDP       | N53          | 1608  | 1614 | HLA-B*07:02 | 100% | Dengue virus 1 | ELISPOT            | IFN-g release       | Positive            | 1         | 1          | 1           | 1           | 1           | 1           | 1           | 1           | 1           | 1           | 1           | 1           | 1           | 1           | 1           | 1           | 1           | 1           | 1           | 1           | 1           | 1           | 1           |
| 183931                                                                               | RPWLDART        | N53          | 2068  | 2076 | HLA-B*07:02 | 100% | Dengue virus 1 | ELISPOT            | IFN-g release       | Positive            | 1         | 1          | 1           | 1           | 1           | 1           | 1           | 1           | 1           | 1           | 1           | 1           | 1           | 1           | 1           | 1           | 1           | 1           | 1           | 1           | 1           | 1           | 1           |
| 183931                                                                               | GEAKYVIEL       | N53          | 2003  | 2012 | HLA-B*40:01 | 100% | Dengue virus 1 | ELISPOT            | IFN-g release       | Positive            | 1         | 1          | 1           | 1           | 1           | 1           | 1           | 1           | 1           | 1           | 1           | 1           | 1           | 1           | 1           | 1           | 1           | 1           | 1           | 1           | 1           | 1           | 1           |
| 183931                                                                               | VPTVYDMMK       | N53          | 1711  | 1750 | HLA-B*51:01 | 100% | Dengue virus 1 | ELISPOT            | IFN-g release       | Positive            | 1         | 1          | 1           | 1           | 1           | 1           | 1           | 1           | 1           | 1           | 1           | 1           | 1           | 1           | 1           | 1           | 1           | 1           | 1           | 1           | 1           | 1           | 1           |
| 183931                                                                               | TPQDANVQD       | N53          | 1803  | 1810 | HLA-B*35:01 | 100% | Dengue virus 1 | ELISPOT            | IFN-g release       | Positive            | 1         | 1          | 1           | 1           | 1           | 1           | 1           | 1           | 1           | 1           | 1           | 1           | 1           | 1           | 1           | 1           | 1           | 1           | 1           | 1           | 1           | 1           | 1           |
| 183931                                                                               | HPGSGITFRY      | N53          | 1670  | 1679 | HLA-B*35:01 | 100% | Dengue virus 1 | ELISPOT            | IFN-g release       | Positive            | 1         | 1          | 1           | 1           | 1           | 1           | 1           | 1           | 1           | 1           | 1           | 1           | 1           | 1           | 1           | 1           | 1           | 1           | 1           | 1           | 1           | 1           | 1           |
| 183931                                                                               | LENNMDVTE       | N53          | 2049  | 2058 | HLA-A*03:01 | 100% | Dengue virus 1 | ELISPOT            | IFN-g release       | Positive            | 1         | 1          | 1           | 1           | 1           | 1           | 1           | 1           | 1           | 1           | 1           | 1           | 1           | 1           | 1           | 1           | 1           | 1           | 1           | 1           | 1           | 1           | 1           |
| 183931                                                                               | MPVQTVAT        | N53          | 1714  | 1723 | HLA-B*35:01 | 100% | Dengue virus 1 | ELISPOT            | IFN-g release       | Positive            | 1         | 1          | 1           | 1           | 1           | 1           | 1           | 1           | 1           | 1           | 1           | 1           | 1           | 1           | 1           | 1           | 1           | 1           | 1           | 1           | 1           | 1           | 1           |
| 183931                                                                               | SPVTPVNNYM      | N53          | 1747  | 1756 | HLA-B*35:01 | 100% | Dengue virus 1 | ELISPOT            | IFN-g release       | Positive            | 1         | 1          | 1           | 1           | 1           | 1           | 1           | 1           | 1           | 1           | 1           | 1           | 1           | 1           | 1           | 1           | 1           | 1           | 1           | 1           | 1           | 1           | 1           |
| 183931                                                                               | SVNVASG         | N53          | 2023  | 2031 | HLA-B*40:01 | 100% | Dengue virus 1 | ELISPOT            | IFN-g release       | Positive            | 1         | 1          | 1           | 1           | 1           | 1           | 1           | 1           | 1           | 1           | 1           | 1           | 1           | 1           | 1           | 1           | 1           | 1           | 1           | 1           | 1           | 1           | 1           |
| 183931                                                                               | VLDGSDYH        | N53          | 1492  | 1500 | HLA-A*02:01 | 100% | Dengue virus 1 | ELISPOT            | IFN-g release       | Positive            | 1         | 1          | 1           | 1           | 1           | 1           | 1           | 1           | 1           | 1           | 1           | 1           | 1           | 1           | 1           | 1           | 1           | 1           | 1           | 1           | 1           | 1           | 1           |
| 183931                                                                               | YKSGEDQV        | N53          | 2024  | 2033 | HLA-B*35:01 | 100% | Dengue virus 1 | ELISPOT            | IFN-g release       | Positive            | 1         | 1          | 1           | 1           | 1           | 1           | 1           | 1           | 1           | 1           | 1           | 1           | 1           | 1           | 1           | 1           | 1           | 1           | 1           | 1           | 1           | 1           | 1           |
| 183931                                                                               | GTSGSPVIRN      | N53          | 113   | 142  | HLA-B*7:01  | 100% | Dengue virus 1 | 51 chromium        | cytotoxicity        | Positive            | 1         | 1          | 1           | 1           | 1           | 1           | 1           | 1           | 1           | 1           | 1           | 1           | 1           | 1           | 1           | 1           | 1           | 1           | 1           | 1           | 1           | 1           | 1           |
| 183931                                                                               | LPWLVSVK        | N53          | 2018  | 2026 | HLA-B*51:01 | 100% | Dengue virus 1 | ELISPOT            | IFN-g release       | Positive            | 1         | 1          | 1           | 1           | 1           | 1           | 1           | 1           | 1           | 1           | 1           | 1           | 1           | 1           | 1           | 1           | 1           | 1           | 1           | 1           | 1           | 1           | 1           |
| 183931                                                                               | LIIEAKRTPLFMR   | N53          | 526   | 540  | HLA class I | 100% | Dengue virus 1 | ELISPOT            | IFN-g release       | Positive            | 1         | 1          | 1           | 1           | 1           | 1           | 1           | 1           | 1           | 1           | 1           | 1           | 1           | 1           | 1           | 1           | 1           | 1           | 1           | 1           | 1           | 1           | 1           |
| 183931                                                                               | NIRNANDLAV      | N53          | 1715  | 1744 | HLA-B*1:01  | 100% | Dengue virus 1 | ELISPOT            | IFN-g release       | Positive            | 1         | 1          | 1           | 1           | 1           | 1           | 1           | 1           | 1           | 1           | 1           | 1           | 1           | 1           | 1           | 1           | 1           | 1           | 1           | 1           | 1           | 1           | 1           |
| 183931                                                                               | IVDSRICAL       | N53          | 1897  | 1905 | HLA-B*07:02 | 100% | Dengue virus 1 | ELISPOT            | IFN-g release       | Positive            | 1         | 1          | 1           | 1           | 1           | 1           | 1           | 1           | 1           | 1           | 1           | 1           | 1           | 1           | 1           | 1           | 1           | 1           | 1           | 1           | 1           | 1           | 1           |
| 183931                                                                               | TPQDNLAV        | N54a         | 2222  | 2231 | HLA-B*07:02 | 100% | Dengue virus 1 | ELISPOT            | IFN-g release       | Positive            | 1         | 1          | 1           | 1           | 1           | 1           | 1           | 1           | 1           | 1           | 1           | 1           | 1           | 1           | 1           | 1           | 1           | 1           | 1           | 1           | 1           | 1           | 1           |
| 183931                                                                               | TPQDNLAV        | N54a         | 2222  | 2230 | HLA-B*35:01 | 100% | Dengue virus 1 | ELISPOT            | IFN-g release       | Positive            | 1         | 1          | 1           | 1           | 1           | 1           | 1           | 1           | 1           | 1           | 1           | 1           | 1           | 1           | 1           | 1           | 1           | 1           | 1           | 1           | 1           | 1           | 1           |
| 183931                                                                               | LPQVTEAL        | N54a         | 2142  | 2150 | HLA-B*51:01 | 100% | Dengue virus 1 | ELISPOT            | IFN-g release       | Positive            | 1         | 1          | 1           | 1           | 1           | 1           | 1           | 1           | 1           | 1           | 1           | 1           | 1           | 1           | 1           | 1           | 1           | 1           | 1           | 1           | 1           | 1           | 1           |
| 183931                                                                               | LPQVTEAL        | N54a         | 2142  | 2151 | HLA-B*35:01 | 100% | Dengue virus 1 | ELISPOT            | IFN-g release       | Positive            | 1         | 1          | 1           | 1           | 1           | 1           | 1           | 1           | 1           | 1           | 1           | 1           | 1           | 1           | 1           | 1           | 1           | 1           | 1           | 1           | 1           | 1           | 1           |
| 183931                                                                               | AVRSMREL        | N54a         | 2134  | 2142 | HLA-A*24:02 | 100% | Dengue virus 1 | ELISPOT            | IFN-g release       | Positive High       | 1         | 1          | 1           | 1           | 1           | 1           | 1           | 1           | 1           | 1           | 1           | 1           | 1           | 1           | 1           | 1           | 1           | 1           | 1           | 1           | 1           | 1           | 1           |
| 183931                                                                               | MLALALAL        | N54a         | 1450  | 1458 | HLA-A2      | 100% | Dengue virus 1 | ELISPOT            | IFN-g release       | Positive            | 1         | 1          | 1           | 1           | 1           | 1           | 1           | 1           | 1           | 1           | 1           | 1           | 1           | 1           | 1           | 1           | 1           | 1           | 1           | 1           | 1           | 1           | 1           |
| 183931                                                                               | NPLTALAV        | N54b         | 2348  | 2356 | HLA-B*07:02 | 100% | Dengue virus 1 | ELISPOT            | IFN-g release       | Positive            | 1         | 1          | 1           | 1           | 1           | 1           | 1           | 1           | 1           | 1           | 1           | 1           | 1           | 1           | 1           | 1           | 1           | 1           | 1           | 1           | 1           | 1           | 1           |
| 183931                                                                               | VYVDFAEK        | N54b         | 2403  | 2411 | HLA-A*11:01 | 100% | Dengue virus 1 | ELISPOT            | IFN-g release       | Positive            | 1         | 1          | 1           | 1           | 1           | 1           | 1           | 1           | 1           | 1           | 1           | 1           | 1           | 1           | 1           | 1           | 1           | 1           | 1           | 1           | 1           | 1           | 1           |
| 183931                                                                               | ILIMRTVLA       | N54b         | 2426  | 2434 | HLA-A2      | 100% | Dengue virus 1 | ELISPOT            | IFN-g release       | Positive            | 1         | 1          | 1           | 1           | 1           | 1           | 1           | 1           | 1           | 1           | 1           | 1           | 1           | 1           | 1           | 1           | 1           | 1           | 1           | 1           | 1           | 1           | 1           |
| 183931                                                                               | MANFRSRY        | N54b         | 2466  | 2474 | HLA-B*35:01 | 100% | Dengue virus 1 | ELISPOT            | IFN-g release       | Positive            | 1         | 1          | 1           | 1           | 1           | 1           | 1           | 1           | 1           | 1           | 1           | 1           | 1           | 1           | 1           | 1           | 1           | 1           | 1           | 1           | 1           | 1           | 1           |
| 183931                                                                               | VLMVAVTA        | N54b         | 2356  | 2364 | HLA-A2      | 100% | Dengue virus 1 | ELISPOT            | IFN-g release       | Positive            | 1         | 1          | 1           | 1           | 1           | 1           | 1           | 1           | 1           | 1           | 1           | 1           | 1           | 1           | 1           | 1           | 1           | 1           | 1           | 1           | 1           | 1           | 1           |
| 183931                                                                               | ILACAGVLA       | N54b         | 2474  | 2482 | HLA-B*07:02 | 100% | Dengue virus 1 | ELISPOT            | IFN-g release       | Positive            | 1         | 1          | 1           | 1           | 1           | 1           | 1           | 1           | 1           | 1           | 1           | 1           | 1           | 1           | 1           | 1           | 1           | 1           | 1           | 1           | 1           | 1           | 1           |
| 183931                                                                               | SRNTHDMY        | N55          | 2703  | 2711 | HLA         |      |                |                    |                     |                     |           |            |             |             |             |             |             |             |             |             |             |             |             |             |             |             |             |             |             |             |             |             |             |



[illegible]







|        |             |      |      |      |      |      |      |      |      |      |      |      |      |      |      |      |      |      |      |      |      |     |     |     |     |     |     |     |     |     |     |     |     |     |     |     |     |     |     |     |     |     |     |     |     |     |     |     |     |     |     |     |     |     |     |     |     |     |     |     |     |     |     |     |     |     |     |     |     |     |     |     |     |     |     |     |     |     |     |     |     |     |     |     |     |     |     |     |     |     |     |     |     |     |     |     |     |     |     |     |     |     |     |     |     |     |     |     |     |     |     |     |     |     |     |     |     |     |     |     |     |     |     |     |     |     |     |     |     |     |     |     |     |     |     |     |     |     |     |     |     |     |     |     |     |     |     |     |     |     |     |     |     |     |     |     |     |     |     |     |     |     |     |     |     |     |     |     |     |     |     |     |     |     |     |     |     |     |     |     |     |     |     |     |     |     |     |     |     |     |     |     |     |     |     |     |     |     |     |     |     |     |     |     |     |     |     |     |     |     |     |     |     |     |     |     |     |     |     |     |     |     |     |     |     |     |     |     |     |     |     |     |     |     |     |     |     |     |     |     |     |     |     |     |     |     |     |     |     |     |     |     |     |     |     |     |     |     |     |     |     |     |     |     |     |     |     |     |     |     |     |     |     |     |     |     |     |     |     |     |     |     |     |     |     |     |     |     |     |     |     |     |     |     |     |     |     |     |     |     |     |     |     |     |     |     |     |     |     |     |     |     |     |     |     |     |     |     |     |     |     |     |     |     |     |     |     |     |     |     |     |     |     |     |     |     |     |     |     |     |     |     |     |     |     |     |     |     |     |     |     |     |     |     |     |     |     |     |     |     |     |     |     |     |     |     |     |     |     |     |     |     |     |     |     |     |     |     |     |     |     |     |     |     |     |     |     |     |     |     |     |     |     |     |     |     |     |     |     |     |     |     |     |     |     |     |     |     |     |     |     |     |     |     |     |     |     |     |     |     |     |     |     |     |     |     |     |     |     |     |     |     |     |     |     |     |     |     |     |     |     |     |     |     |     |     |     |     |     |     |     |     |     |     |     |     |     |     |     |     |     |     |     |     |     |     |     |     |     |     |     |     |     |     |     |     |     |     |     |     |     |     |     |     |     |     |     |     |     |     |     |     |     |     |     |     |     |     |     |     |     |     |     |     |     |     |     |     |     |     |     |     |     |     |     |     |     |     |     |     |     |     |     |     |     |     |     |     |     |     |     |     |     |     |     |     |     |     |     |     |     |     |     |     |     |     |     |     |     |     |     |     |     |     |     |     |     |     |     |     |     |     |     |     |     |     |     |     |     |     |     |     |     |     |     |     |     |     |     |     |     |     |     |     |     |     |     |     |     |     |     |     |     |     |     |     |     |     |     |     |     |     |     |     |     |     |     |     |     |     |     |     |     |     |     |     |     |     |     |     |     |     |     |     |     |     |     |     |     |     |     |     |     |     |     |     |     |     |     |     |     |     |     |     |     |     |     |     |     |     |     |     |     |     |     |     |     |     |     |     |     |     |     |     |     |     |     |     |     |     |     |     |     |     |     |     |     |     |     |     |     |     |     |     |     |     |     |     |     |     |     |     |     |     |     |     |     |     |     |     |     |     |     |     |     |     |     |     |     |     |     |     |     |     |     |     |     |     |     |     |     |     |     |     |     |     |     |     |     |     |     |     |     |     |     |     |     |     |     |     |     |     |     |     |     |     |     |     |     |     |     |     |     |     |     |     |     |     |     |     |     |     |     |     |     |     |     |     |     |     |     |     |     |     |     |     |     |     |     |     |     |     |     |     |     |     |     |     |     |     |     |     |     |     |     |     |     |     |     |     |     |     |     |     |     |     |     |     |     |     |     |     |     |     |     |     |     |     |     |     |     |     |     |     |     |     |     |     |     |     |     |     |     |     |     |     |     |     |     |     |     |     |     |     |     |     |     |     |     |     |     |     |     |     |     |     |     |     |     |     |     |     |     |     |     |     |     |     |     |     |     |     |     |     |     |     |     |     |     |     |     |     |     |     |     |     |     |     |     |     |     |     |     |     |     |     |     |     |     |     |     |     |     |     |     |     |     |     |     |     |     |     |     |     |     |     |     |     |     |     |     |    |    |    |    |    |    |    |    |    |    |    |    |    |    |    |    |    |    |    |    |    |    |    |    |    |    |    |    |    |    |    |    |    |    |    |    |    |    |    |    |    |    |    |    |    |    |    |    |    |    |    |    |    |    |    |    |    |    |    |    |    |    |    |    |    |    |    |    |    |    |    |    |    |    |    |    |    |    |    |    |    |    |    |    |    |    |    |    |    |    |   |   |   |   |   |   |   |   |   |   |
|--------|-------------|------|------|------|------|------|------|------|------|------|------|------|------|------|------|------|------|------|------|------|------|-----|-----|-----|-----|-----|-----|-----|-----|-----|-----|-----|-----|-----|-----|-----|-----|-----|-----|-----|-----|-----|-----|-----|-----|-----|-----|-----|-----|-----|-----|-----|-----|-----|-----|-----|-----|-----|-----|-----|-----|-----|-----|-----|-----|-----|-----|-----|-----|-----|-----|-----|-----|-----|-----|-----|-----|-----|-----|-----|-----|-----|-----|-----|-----|-----|-----|-----|-----|-----|-----|-----|-----|-----|-----|-----|-----|-----|-----|-----|-----|-----|-----|-----|-----|-----|-----|-----|-----|-----|-----|-----|-----|-----|-----|-----|-----|-----|-----|-----|-----|-----|-----|-----|-----|-----|-----|-----|-----|-----|-----|-----|-----|-----|-----|-----|-----|-----|-----|-----|-----|-----|-----|-----|-----|-----|-----|-----|-----|-----|-----|-----|-----|-----|-----|-----|-----|-----|-----|-----|-----|-----|-----|-----|-----|-----|-----|-----|-----|-----|-----|-----|-----|-----|-----|-----|-----|-----|-----|-----|-----|-----|-----|-----|-----|-----|-----|-----|-----|-----|-----|-----|-----|-----|-----|-----|-----|-----|-----|-----|-----|-----|-----|-----|-----|-----|-----|-----|-----|-----|-----|-----|-----|-----|-----|-----|-----|-----|-----|-----|-----|-----|-----|-----|-----|-----|-----|-----|-----|-----|-----|-----|-----|-----|-----|-----|-----|-----|-----|-----|-----|-----|-----|-----|-----|-----|-----|-----|-----|-----|-----|-----|-----|-----|-----|-----|-----|-----|-----|-----|-----|-----|-----|-----|-----|-----|-----|-----|-----|-----|-----|-----|-----|-----|-----|-----|-----|-----|-----|-----|-----|-----|-----|-----|-----|-----|-----|-----|-----|-----|-----|-----|-----|-----|-----|-----|-----|-----|-----|-----|-----|-----|-----|-----|-----|-----|-----|-----|-----|-----|-----|-----|-----|-----|-----|-----|-----|-----|-----|-----|-----|-----|-----|-----|-----|-----|-----|-----|-----|-----|-----|-----|-----|-----|-----|-----|-----|-----|-----|-----|-----|-----|-----|-----|-----|-----|-----|-----|-----|-----|-----|-----|-----|-----|-----|-----|-----|-----|-----|-----|-----|-----|-----|-----|-----|-----|-----|-----|-----|-----|-----|-----|-----|-----|-----|-----|-----|-----|-----|-----|-----|-----|-----|-----|-----|-----|-----|-----|-----|-----|-----|-----|-----|-----|-----|-----|-----|-----|-----|-----|-----|-----|-----|-----|-----|-----|-----|-----|-----|-----|-----|-----|-----|-----|-----|-----|-----|-----|-----|-----|-----|-----|-----|-----|-----|-----|-----|-----|-----|-----|-----|-----|-----|-----|-----|-----|-----|-----|-----|-----|-----|-----|-----|-----|-----|-----|-----|-----|-----|-----|-----|-----|-----|-----|-----|-----|-----|-----|-----|-----|-----|-----|-----|-----|-----|-----|-----|-----|-----|-----|-----|-----|-----|-----|-----|-----|-----|-----|-----|-----|-----|-----|-----|-----|-----|-----|-----|-----|-----|-----|-----|-----|-----|-----|-----|-----|-----|-----|-----|-----|-----|-----|-----|-----|-----|-----|-----|-----|-----|-----|-----|-----|-----|-----|-----|-----|-----|-----|-----|-----|-----|-----|-----|-----|-----|-----|-----|-----|-----|-----|-----|-----|-----|-----|-----|-----|-----|-----|-----|-----|-----|-----|-----|-----|-----|-----|-----|-----|-----|-----|-----|-----|-----|-----|-----|-----|-----|-----|-----|-----|-----|-----|-----|-----|-----|-----|-----|-----|-----|-----|-----|-----|-----|-----|-----|-----|-----|-----|-----|-----|-----|-----|-----|-----|-----|-----|-----|-----|-----|-----|-----|-----|-----|-----|-----|-----|-----|-----|-----|-----|-----|-----|-----|-----|-----|-----|-----|-----|-----|-----|-----|-----|-----|-----|-----|-----|-----|-----|-----|-----|-----|-----|-----|-----|-----|-----|-----|-----|-----|-----|-----|-----|-----|-----|-----|-----|-----|-----|-----|-----|-----|-----|-----|-----|-----|-----|-----|-----|-----|-----|-----|-----|-----|-----|-----|-----|-----|-----|-----|-----|-----|-----|-----|-----|-----|-----|-----|-----|-----|-----|-----|-----|-----|-----|-----|-----|-----|-----|-----|-----|-----|-----|-----|-----|-----|-----|-----|-----|-----|-----|-----|-----|-----|-----|-----|-----|-----|-----|-----|-----|-----|-----|-----|-----|-----|-----|-----|-----|-----|-----|-----|-----|-----|-----|-----|-----|-----|-----|-----|-----|-----|-----|-----|-----|-----|-----|-----|-----|-----|-----|-----|-----|-----|-----|-----|-----|-----|-----|-----|-----|-----|-----|-----|-----|-----|-----|-----|-----|-----|-----|-----|-----|-----|-----|-----|-----|-----|-----|-----|-----|-----|-----|-----|-----|-----|-----|-----|-----|-----|-----|-----|-----|-----|-----|-----|-----|-----|-----|-----|-----|-----|-----|-----|-----|-----|-----|-----|-----|-----|-----|-----|-----|-----|-----|-----|-----|-----|-----|-----|-----|-----|-----|-----|-----|-----|-----|-----|-----|-----|-----|-----|-----|-----|-----|-----|-----|-----|-----|-----|-----|-----|-----|-----|-----|-----|-----|-----|-----|-----|-----|-----|-----|-----|-----|-----|-----|-----|-----|-----|-----|-----|-----|-----|-----|-----|-----|-----|-----|-----|-----|-----|-----|-----|-----|-----|-----|-----|-----|-----|-----|-----|-----|-----|-----|-----|-----|-----|-----|-----|-----|-----|-----|-----|-----|-----|-----|-----|-----|-----|-----|-----|-----|-----|-----|-----|-----|-----|-----|-----|-----|-----|-----|-----|-----|-----|-----|-----|-----|-----|-----|-----|-----|-----|-----|-----|-----|-----|-----|-----|-----|-----|-----|-----|-----|-----|-----|-----|-----|-----|-----|-----|----|----|----|----|----|----|----|----|----|----|----|----|----|----|----|----|----|----|----|----|----|----|----|----|----|----|----|----|----|----|----|----|----|----|----|----|----|----|----|----|----|----|----|----|----|----|----|----|----|----|----|----|----|----|----|----|----|----|----|----|----|----|----|----|----|----|----|----|----|----|----|----|----|----|----|----|----|----|----|----|----|----|----|----|----|----|----|----|----|----|---|---|---|---|---|---|---|---|---|---|
| 100000 | Ameghinella | 1026 | 1019 | 1017 | 1016 | 1015 | 1014 | 1013 | 1012 | 1011 | 1010 | 1009 | 1008 | 1007 | 1006 | 1005 | 1004 | 1003 | 1002 | 1001 | 1000 | 999 | 998 | 997 | 996 | 995 | 994 | 993 | 992 | 991 | 990 | 989 | 988 | 987 | 986 | 985 | 984 | 983 | 982 | 981 | 980 | 979 | 978 | 977 | 976 | 975 | 974 | 973 | 972 | 971 | 970 | 969 | 968 | 967 | 966 | 965 | 964 | 963 | 962 | 961 | 960 | 959 | 958 | 957 | 956 | 955 | 954 | 953 | 952 | 951 | 950 | 949 | 948 | 947 | 946 | 945 | 944 | 943 | 942 | 941 | 940 | 939 | 938 | 937 | 936 | 935 | 934 | 933 | 932 | 931 | 930 | 929 | 928 | 927 | 926 | 925 | 924 | 923 | 922 | 921 | 920 | 919 | 918 | 917 | 916 | 915 | 914 | 913 | 912 | 911 | 910 | 909 | 908 | 907 | 906 | 905 | 904 | 903 | 902 | 901 | 900 | 899 | 898 | 897 | 896 | 895 | 894 | 893 | 892 | 891 | 890 | 889 | 888 | 887 | 886 | 885 | 884 | 883 | 882 | 881 | 880 | 879 | 878 | 877 | 876 | 875 | 874 | 873 | 872 | 871 | 870 | 869 | 868 | 867 | 866 | 865 | 864 | 863 | 862 | 861 | 860 | 859 | 858 | 857 | 856 | 855 | 854 | 853 | 852 | 851 | 850 | 849 | 848 | 847 | 846 | 845 | 844 | 843 | 842 | 841 | 840 | 839 | 838 | 837 | 836 | 835 | 834 | 833 | 832 | 831 | 830 | 829 | 828 | 827 | 826 | 825 | 824 | 823 | 822 | 821 | 820 | 819 | 818 | 817 | 816 | 815 | 814 | 813 | 812 | 811 | 810 | 809 | 808 | 807 | 806 | 805 | 804 | 803 | 802 | 801 | 800 | 799 | 798 | 797 | 796 | 795 | 794 | 793 | 792 | 791 | 790 | 789 | 788 | 787 | 786 | 785 | 784 | 783 | 782 | 781 | 780 | 779 | 778 | 777 | 776 | 775 | 774 | 773 | 772 | 771 | 770 | 769 | 768 | 767 | 766 | 765 | 764 | 763 | 762 | 761 | 760 | 759 | 758 | 757 | 756 | 755 | 754 | 753 | 752 | 751 | 750 | 749 | 748 | 747 | 746 | 745 | 744 | 743 | 742 | 741 | 740 | 739 | 738 | 737 | 736 | 735 | 734 | 733 | 732 | 731 | 730 | 729 | 728 | 727 | 726 | 725 | 724 | 723 | 722 | 721 | 720 | 719 | 718 | 717 | 716 | 715 | 714 | 713 | 712 | 711 | 710 | 709 | 708 | 707 | 706 | 705 | 704 | 703 | 702 | 701 | 700 | 699 | 698 | 697 | 696 | 695 | 694 | 693 | 692 | 691 | 690 | 689 | 688 | 687 | 686 | 685 | 684 | 683 | 682 | 681 | 680 | 679 | 678 | 677 | 676 | 675 | 674 | 673 | 672 | 671 | 670 | 669 | 668 | 667 | 666 | 665 | 664 | 663 | 662 | 661 | 660 | 659 | 658 | 657 | 656 | 655 | 654 | 653 | 652 | 651 | 650 | 649 | 648 | 647 | 646 | 645 | 644 | 643 | 642 | 641 | 640 | 639 | 638 | 637 | 636 | 635 | 634 | 633 | 632 | 631 | 630 | 629 | 628 | 627 | 626 | 625 | 624 | 623 | 622 | 621 | 620 | 619 | 618 | 617 | 616 | 615 | 614 | 613 | 612 | 611 | 610 | 609 | 608 | 607 | 606 | 605 | 604 | 603 | 602 | 601 | 600 | 599 | 598 | 597 | 596 | 595 | 594 | 593 | 592 | 591 | 590 | 589 | 588 | 587 | 586 | 585 | 584 | 583 | 582 | 581 | 580 | 579 | 578 | 577 | 576 | 575 | 574 | 573 | 572 | 571 | 570 | 569 | 568 | 567 | 566 | 565 | 564 | 563 | 562 | 561 | 560 | 559 | 558 | 557 | 556 | 555 | 554 | 553 | 552 | 551 | 550 | 549 | 548 | 547 | 546 | 545 | 544 | 543 | 542 | 541 | 540 | 539 | 538 | 537 | 536 | 535 | 534 | 533 | 532 | 531 | 530 | 529 | 528 | 527 | 526 | 525 | 524 | 523 | 522 | 521 | 520 | 519 | 518 | 517 | 516 | 515 | 514 | 513 | 512 | 511 | 510 | 509 | 508 | 507 | 506 | 505 | 504 | 503 | 502 | 501 | 500 | 499 | 498 | 497 | 496 | 495 | 494 | 493 | 492 | 491 | 490 | 489 | 488 | 487 | 486 | 485 | 484 | 483 | 482 | 481 | 480 | 479 | 478 | 477 | 476 | 475 | 474 | 473 | 472 | 471 | 470 | 469 | 468 | 467 | 466 | 465 | 464 | 463 | 462 | 461 | 460 | 459 | 458 | 457 | 456 | 455 | 454 | 453 | 452 | 451 | 450 | 449 | 448 | 447 | 446 | 445 | 444 | 443 | 442 | 441 | 440 | 439 | 438 | 437 | 436 | 435 | 434 | 433 | 432 | 431 | 430 | 429 | 428 | 427 | 426 | 425 | 424 | 423 | 422 | 421 | 420 | 419 | 418 | 417 | 416 | 415 | 414 | 413 | 412 | 411 | 410 | 409 | 408 | 407 | 406 | 405 | 404 | 403 | 402 | 401 | 400 | 399 | 398 | 397 | 396 | 395 | 394 | 393 | 392 | 391 | 390 | 389 | 388 | 387 | 386 | 385 | 384 | 383 | 382 | 381 | 380 | 379 | 378 | 377 | 376 | 375 | 374 | 373 | 372 | 371 | 370 | 369 | 368 | 367 | 366 | 365 | 364 | 363 | 362 | 361 | 360 | 359 | 358 | 357 | 356 | 355 | 354 | 353 | 352 | 351 | 350 | 349 | 348 | 347 | 346 | 345 | 344 | 343 | 342 | 341 | 340 | 339 | 338 | 337 | 336 | 335 | 334 | 333 | 332 | 331 | 330 | 329 | 328 | 327 | 326 | 325 | 324 | 323 | 322 | 321 | 320 | 319 | 318 | 317 | 316 | 315 | 314 | 313 | 312 | 311 | 310 | 309 | 308 | 307 | 306 | 305 | 304 | 303 | 302 | 301 | 300 | 299 | 298 | 297 | 296 | 295 | 294 | 293 | 292 | 291 | 290 | 289 | 288 | 287 | 286 | 285 | 284 | 283 | 282 | 281 | 280 | 279 | 278 | 277 | 276 | 275 | 274 | 273 | 272 | 271 | 270 | 269 | 268 | 267 | 266 | 265 | 264 | 263 | 262 | 261 | 260 | 259 | 258 | 257 | 256 | 255 | 254 | 253 | 252 | 251 | 250 | 249 | 248 | 247 | 246 | 245 | 244 | 243 | 242 | 241 | 240 | 239 | 238 | 237 | 236 | 235 | 234 | 233 | 232 | 231 | 230 | 229 | 228 | 227 | 226 | 225 | 224 | 223 | 222 | 221 | 220 | 219 | 218 | 217 | 216 | 215 | 214 | 213 | 212 | 211 | 210 | 209 | 208 | 207 | 206 | 205 | 204 | 203 | 202 | 201 | 200 | 199 | 198 | 197 | 196 | 195 | 194 | 193 | 192 | 191 | 190 | 189 | 188 | 187 | 186 | 185 | 184 | 183 | 182 | 181 | 180 | 179 | 178 | 177 | 176 | 175 | 174 | 173 | 172 | 171 | 170 | 169 | 168 | 167 | 166 | 165 | 164 | 163 | 162 | 161 | 160 | 159 | 158 | 157 | 156 | 155 | 154 | 153 | 152 | 151 | 150 | 149 | 148 | 147 | 146 | 145 | 144 | 143 | 142 | 141 | 140 | 139 | 138 | 137 | 136 | 135 | 134 | 133 | 132 | 131 | 130 | 129 | 128 | 127 | 126 | 125 | 124 | 123 | 122 | 121 | 120 | 119 | 118 | 117 | 116 | 115 | 114 | 113 | 112 | 111 | 110 | 109 | 108 | 107 | 106 | 105 | 104 | 103 | 102 | 101 | 100 | 99 | 98 | 97 | 96 | 95 | 94 | 93 | 92 | 91 | 90 | 89 | 88 | 87 | 86 | 85 | 84 | 83 | 82 | 81 | 80 | 79 | 78 | 77 | 76 | 75 | 74 | 73 | 72 | 71 | 70 | 69 | 68 | 67 | 66 | 65 | 64 | 63 | 62 | 61 | 60 | 59 | 58 | 57 | 56 | 55 | 54 | 53 | 52 | 51 | 50 | 49 | 48 | 47 | 46 | 45 | 44 | 43 | 42 | 41 | 40 | 39 | 38 | 37 | 36 | 35 | 34 | 33 | 32 | 31 | 30 | 29 | 28 | 27 | 26 | 25 | 24 | 23 | 22 | 21 | 20 | 19 | 18 | 17 | 16 | 15 | 14 | 13 | 12 | 11 | 10 | 9 | 8 | 7 | 6 | 5 | 4 | 3 | 2 | 1 | 0 |
|--------|-------------|------|------|------|------|------|------|------|------|------|------|------|------|------|------|------|------|------|------|------|------|-----|-----|-----|-----|-----|-----|-----|-----|-----|-----|-----|-----|-----|-----|-----|-----|-----|-----|-----|-----|-----|-----|-----|-----|-----|-----|-----|-----|-----|-----|-----|-----|-----|-----|-----|-----|-----|-----|-----|-----|-----|-----|-----|-----|-----|-----|-----|-----|-----|-----|-----|-----|-----|-----|-----|-----|-----|-----|-----|-----|-----|-----|-----|-----|-----|-----|-----|-----|-----|-----|-----|-----|-----|-----|-----|-----|-----|-----|-----|-----|-----|-----|-----|-----|-----|-----|-----|-----|-----|-----|-----|-----|-----|-----|-----|-----|-----|-----|-----|-----|-----|-----|-----|-----|-----|-----|-----|-----|-----|-----|-----|-----|-----|-----|-----|-----|-----|-----|-----|-----|-----|-----|-----|-----|-----|-----|-----|-----|-----|-----|-----|-----|-----|-----|-----|-----|-----|-----|-----|-----|-----|-----|-----|-----|-----|-----|-----|-----|-----|-----|-----|-----|-----|-----|-----|-----|-----|-----|-----|-----|-----|-----|-----|-----|-----|-----|-----|-----|-----|-----|-----|-----|-----|-----|-----|-----|-----|-----|-----|-----|-----|-----|-----|-----|-----|-----|-----|-----|-----|-----|-----|-----|-----|-----|-----|-----|-----|-----|-----|-----|-----|-----|-----|-----|-----|-----|-----|-----|-----|-----|-----|-----|-----|-----|-----|-----|-----|-----|-----|-----|-----|-----|-----|-----|-----|-----|-----|-----|-----|-----|-----|-----|-----|-----|-----|-----|-----|-----|-----|-----|-----|-----|-----|-----|-----|-----|-----|-----|-----|-----|-----|-----|-----|-----|-----|-----|-----|-----|-----|-----|-----|-----|-----|-----|-----|-----|-----|-----|-----|-----|-----|-----|-----|-----|-----|-----|-----|-----|-----|-----|-----|-----|-----|-----|-----|-----|-----|-----|-----|-----|-----|-----|-----|-----|-----|-----|-----|-----|-----|-----|-----|-----|-----|-----|-----|-----|-----|-----|-----|-----|-----|-----|-----|-----|-----|-----|-----|-----|-----|-----|-----|-----|-----|-----|-----|-----|-----|-----|-----|-----|-----|-----|-----|-----|-----|-----|-----|-----|-----|-----|-----|-----|-----|-----|-----|-----|-----|-----|-----|-----|-----|-----|-----|-----|-----|-----|-----|-----|-----|-----|-----|-----|-----|-----|-----|-----|-----|-----|-----|-----|-----|-----|-----|-----|-----|-----|-----|-----|-----|-----|-----|-----|-----|-----|-----|-----|-----|-----|-----|-----|-----|-----|-----|-----|-----|-----|-----|-----|-----|-----|-----|-----|-----|-----|-----|-----|-----|-----|-----|-----|-----|-----|-----|-----|-----|-----|-----|-----|-----|-----|-----|-----|-----|-----|-----|-----|-----|-----|-----|-----|-----|-----|-----|-----|-----|-----|-----|-----|-----|-----|-----|-----|-----|-----|-----|-----|-----|-----|-----|-----|-----|-----|-----|-----|-----|-----|-----|-----|-----|-----|-----|-----|-----|-----|-----|-----|-----|-----|-----|-----|-----|-----|-----|-----|-----|-----|-----|-----|-----|-----|-----|-----|-----|-----|-----|-----|-----|-----|-----|-----|-----|-----|-----|-----|-----|-----|-----|-----|-----|-----|-----|-----|-----|-----|-----|-----|-----|-----|-----|-----|-----|-----|-----|-----|-----|-----|-----|-----|-----|-----|-----|-----|-----|-----|-----|-----|-----|-----|-----|-----|-----|-----|-----|-----|-----|-----|-----|-----|-----|-----|-----|-----|-----|-----|-----|-----|-----|-----|-----|-----|-----|-----|-----|-----|-----|-----|-----|-----|-----|-----|-----|-----|-----|-----|-----|-----|-----|-----|-----|-----|-----|-----|-----|-----|-----|-----|-----|-----|-----|-----|-----|-----|-----|-----|-----|-----|-----|-----|-----|-----|-----|-----|-----|-----|-----|-----|-----|-----|-----|-----|-----|-----|-----|-----|-----|-----|-----|-----|-----|-----|-----|-----|-----|-----|-----|-----|-----|-----|-----|-----|-----|-----|-----|-----|-----|-----|-----|-----|-----|-----|-----|-----|-----|-----|-----|-----|-----|-----|-----|-----|-----|-----|-----|-----|-----|-----|-----|-----|-----|-----|-----|-----|-----|-----|-----|-----|-----|-----|-----|-----|-----|-----|-----|-----|-----|-----|-----|-----|-----|-----|-----|-----|-----|-----|-----|-----|-----|-----|-----|-----|-----|-----|-----|-----|-----|-----|-----|-----|-----|-----|-----|-----|-----|-----|-----|-----|-----|-----|-----|-----|-----|-----|-----|-----|-----|-----|-----|-----|-----|-----|-----|-----|-----|-----|-----|-----|-----|-----|-----|-----|-----|-----|-----|-----|-----|-----|-----|-----|-----|-----|-----|-----|-----|-----|-----|-----|-----|-----|-----|-----|-----|-----|-----|-----|-----|-----|-----|-----|-----|-----|-----|-----|-----|-----|-----|-----|-----|-----|-----|-----|-----|-----|-----|-----|-----|-----|-----|-----|-----|-----|-----|-----|-----|-----|-----|-----|-----|-----|-----|-----|-----|-----|-----|-----|-----|-----|-----|-----|-----|-----|-----|-----|-----|-----|-----|-----|-----|-----|-----|-----|-----|-----|-----|-----|-----|-----|-----|-----|-----|-----|-----|-----|-----|-----|-----|-----|-----|-----|-----|-----|-----|-----|-----|-----|-----|-----|-----|-----|-----|-----|-----|-----|-----|-----|-----|-----|-----|-----|-----|-----|-----|-----|-----|-----|-----|-----|-----|-----|-----|-----|-----|-----|-----|-----|-----|-----|-----|-----|-----|-----|-----|-----|-----|-----|-----|-----|-----|-----|-----|-----|-----|-----|-----|-----|-----|-----|-----|-----|-----|-----|-----|-----|-----|-----|-----|-----|-----|-----|-----|-----|-----|-----|-----|-----|-----|-----|-----|-----|-----|-----|----|----|----|----|----|----|----|----|----|----|----|----|----|----|----|----|----|----|----|----|----|----|----|----|----|----|----|----|----|----|----|----|----|----|----|----|----|----|----|----|----|----|----|----|----|----|----|----|----|----|----|----|----|----|----|----|----|----|----|----|----|----|----|----|----|----|----|----|----|----|----|----|----|----|----|----|----|----|----|----|----|----|----|----|----|----|----|----|----|----|---|---|---|---|---|---|---|---|---|---|



## CD8 DENV-3 Epitopes

|            |                  |              |       |      |             |      |                |                     |               |                     | NCBI IDs of DENV-3 circulating strains from India, (100% identity=1_green; else 0_red) |             |            |           |              |            |            |            |            |            |             |            |          |              |            |            |          |              |          |          |
|------------|------------------|--------------|-------|------|-------------|------|----------------|---------------------|---------------|---------------------|----------------------------------------------------------------------------------------|-------------|------------|-----------|--------------|------------|------------|------------|------------|------------|-------------|------------|----------|--------------|------------|------------|----------|--------------|----------|----------|
| Epitope_ID | AA_Seq           | Protein_Name | Start | End  | Allele      | step | Serotype       | Method/Technique    | Assay Group   | Qualitative Measure | KDM63678                                                                               | .AF240126.1 | AF240127.1 | ANCS57607 | .JANC57612.3 | QC225021.1 | QC225020.1 | QC225019.1 | QC225016.1 | QC225017.1 | QBAS57533.1 | QEP41653.1 | ACV04798 | .JAXX75610.1 | AXX75612.1 | AXX75611.1 | AML29863 | .JAXX75613.1 | QEP41661 | QEP41655 |
| 180390     | CLMMMLPATL       | C            | 104   | 113  | HLA-A*02:01 | 0%   | Dengue virus 3 | ELISPOT             | IFNγ release  | Positive            | 0                                                                                      | 0           | 0          | 0         | 0            | 0          | 0          | 0          | 0          | 0          | 0           | 0          | 0        | 0            | 0          | 0          | 0        | 0            | 0        | 0        |
| 180609     | LMMLMLPATL       | C            | 105   | 113  | HLA-A*02:01 | 0%   | Dengue virus 3 | ELISPOT             | IFNγ release  | Positive            | 0                                                                                      | 0           | 0          | 0         | 0            | 0          | 0          | 0          | 0          | 0          | 0           | 0          | 0        | 0            | 0          | 0          | 0        | 0            | 0        | 0        |
| 183799     | IMKIGIGVLL       | E            | 452   | 461  | HLA-B*08:01 | 0%   | Dengue virus 3 | ELISPOT             | IFNγ release  | Positive            | 0                                                                                      | 0           | 0          | 0         | 0            | 0          | 0          | 0          | 0          | 0          | 0           | 0          | 0        | 0            | 0          | 0          | 0        | 0            | 0        | 0        |
| 184412     | LKGSYAMCL        | E            | 156   | 165  | HLA-B*08:01 | 0%   | Dengue virus 3 | ELISPOT             | IFNγ release  | Positive            | 0                                                                                      | 0           | 0          | 0         | 0            | 0          | 0          | 0          | 0          | 0          | 0           | 0          | 0        | 0            | 0          | 0          | 0        | 0            | 0        | 0        |
| 186470     | WIMKIGIGVL       | E            | 451   | 460  | HLA-B*08:01 | 0%   | Dengue virus 3 | ELISPOT             | IFNγ release  | Positive            | 0                                                                                      | 0           | 0          | 0         | 0            | 0          | 0          | 0          | 0          | 0          | 0           | 0          | 0        | 0            | 0          | 0          | 0        | 0            | 0        | 0        |
| 185464     | RPINKEENM        | NS1          | 1109  | 1118 | HLA-B*35:01 | 0%   | Dengue virus 3 | ELISPOT             | IFNγ release  | Positive            | 0                                                                                      | 0           | 0          | 0         | 0            | 0          | 0          | 0          | 0          | 0          | 0           | 0          | 0        | 0            | 0          | 0          | 0        | 0            | 0        | 0        |
| 183395     | GKXHMIAGVL       | NS2a         | 1153  | 1162 | HLA-B*08:01 | 0%   | Dengue virus 3 | ELISPOT             | IFNγ release  | Positive            | 0                                                                                      | 0           | 0          | 0         | 0            | 0          | 0          | 0          | 0          | 0          | 0           | 0          | 0        | 0            | 0          | 0          | 0        | 0            | 0        | 0        |
| 3124       | AMKGLPIRY        | NS3          | 1708  | 1716 | HLA-B62     | 0%   | Dengue virus 3 | S1 chromium         | cytotoxicity  | Positive            | 0                                                                                      | 0           | 0          | 0         | 0            | 0          | 0          | 0          | 0          | 0          | 0           | 0          | 0        | 0            | 0          | 0          | 0        | 0            | 0        | 0        |
| 590435     | TRVVAEMEAAMKGLPI | NS3          | 1698  | 1714 | HLA class I | 0%   | Dengue virus 3 | ICS                 | IFNγ release  | Positive-Low        | 0                                                                                      | 0           | 0          | 0         | 0            | 0          | 0          | 0          | 0          | 0          | 0           | 0          | 0        | 0            | 0          | 0          | 0        | 0            | 0        | 0        |
| 180572     | KPRLCTREFE       | NS5          | 2879  | 2888 | HLA-B*07:02 | 0%   | Dengue virus 3 | ELISPOT             | IFNγ release  | Positive            | 0                                                                                      | 0           | 0          | 0         | 0            | 0          | 0          | 0          | 0          | 0          | 0           | 0          | 0        | 0            | 0          | 0          | 0        | 0            | 0        | 0        |
| 180801     | VMGITAEWLV       | NS5          | 2862  | 2871 | HLA-B*53:01 | 0%   | Dengue virus 3 | ELISPOT             | IFNγ release  | Positive            | 0                                                                                      | 0           | 0          | 0         | 0            | 0          | 0          | 0          | 0          | 0          | 0           | 0          | 0        | 0            | 0          | 0          | 0        | 0            | 0        | 0        |
| 186127     | TIWEDVWLV        | NS5          | 3321  | 3329 | HLA-A*02:01 | 0%   | Dengue virus 3 | ELISPOT             | IFNγ release  | Positive            | 0                                                                                      | 0           | 0          | 0         | 0            | 0          | 0          | 0          | 0          | 0          | 0           | 0          | 0        | 0            | 0          | 0          | 0        | 0            | 0        | 0        |
| 32944      | KPWVDVPTV        | NS5          | 2819  | 2827 | HLA class I | 0%   | Dengue virus 3 | S1 chromium         | cytotoxicity  | Positive            | 0                                                                                      | 0           | 0          | 0         | 0            | 0          | 0          | 0          | 0          | 0          | 0           | 0          | 0        | 0            | 0          | 0          | 0        | 0            | 0        | 0        |
| 180464     | FTILALFLAH       | PreM         | 247   | 256  | HLA-B*35:01 | 100% | Dengue virus 3 | ELISPOT             | IFNγ release  | Positive            | 1                                                                                      | 1           | 1          | 1         | 1            | 1          | 1          | 1          | 1          | 1          | 1           | 1          | 1        | 1            | 1          | 1          | 1        | 1            | 1        | 1        |
| 180504     | HPGFTILALF       | PreM         | 244   | 253  | HLA-B*35:01 | 100% | Dengue virus 3 | ELISPOT             | IFNγ release  | Positive            | 1                                                                                      | 1           | 1          | 1         | 1            | 1          | 1          | 1          | 1          | 1          | 1           | 1          | 1        | 1            | 1          | 1          | 1        | 1            | 1        | 1        |
| 185685     | SLFKTAGS         | PreM         | 136   | 144  | HLA-B*08:01 | 100% | Dengue virus 3 | ELISPOT             | IFNγ release  | Positive            | 1                                                                                      | 1           | 1          | 1         | 1            | 1          | 1          | 1          | 1          | 1          | 1           | 1          | 1        | 1            | 1          | 1          | 1        | 1            | 1        | 1        |
| 180613     | LPEEQDQNY        | E            | 82    | 90   | HLA-B*35:01 | 100% | Dengue virus 3 | ELISPOT             | IFNγ release  | Positive            | 1                                                                                      | 1           | 1          | 1         | 1            | 1          | 1          | 1          | 1          | 1          | 1           | 1          | 1        | 1            | 1          | 1          | 1        | 1            | 1        | 1        |
| 180617     | MLVTPSMTM        | E            | 273   | 281  | HLA-B*35:01 | 100% | Dengue virus 3 | ELISPOT             | IFNγ release  | Positive            | 1                                                                                      | 1           | 1          | 1         | 1            | 1          | 1          | 1          | 1          | 1          | 1           | 1          | 1        | 1            | 1          | 1          | 1        | 1            | 1        | 1        |
| 183843     | IQKSGTISF        | E            | 131   | 140  | HLA-B*15:01 | 100% | Dengue virus 3 | ELISPOT             | IFNγ release  | Positive            | 1                                                                                      | 1           | 1          | 1         | 1            | 1          | 1          | 1          | 1          | 1          | 1           | 1          | 1        | 1            | 1          | 1          | 1        | 1            | 1        | 1        |
| 184399     | LATLRKLCI        | E            | 53    | 61   | HLA-B*08:01 | 100% | Dengue virus 3 | ELISPOT             | IFNγ release  | Positive            | 1                                                                                      | 1           | 1          | 1         | 1            | 1          | 1          | 1          | 1          | 1          | 1           | 1          | 1        | 1            | 1          | 1          | 1        | 1            | 1        | 1        |
| 184536     | LPEYTGLE         | E            | 453   | 462  | HLA-B*35:01 | 100% | Dengue virus 3 | ELISPOT             | IFNγ release  | Positive            | 1                                                                                      | 1           | 1          | 1         | 1            | 1          | 1          | 1          | 1          | 1          | 1           | 1          | 1        | 1            | 1          | 1          | 1        | 1            | 1        | 1        |
| 185419     | RKMDKLEL         | E            | 148   | 156  | HLA-B*08:01 | 100% | Dengue virus 3 | ELISPOT             | IFNγ release  | Positive            | 1                                                                                      | 1           | 1          | 1         | 1            | 1          | 1          | 1          | 1          | 1          | 1           | 1          | 1        | 1            | 1          | 1          | 1        | 1            | 1        | 1        |
| 180537     | RPGYHTQT         | NS1          | 1030  | 1038 | HLA-B*07:02 | 100% | Dengue virus 3 | ELISPOT             | IFNγ release  | Positive            | 1                                                                                      | 1           | 1          | 1         | 1            | 1          | 1          | 1          | 1          | 1          | 1           | 1          | 1        | 1            | 1          | 1          | 1        | 1            | 1        | 1        |
| 180546     | RSCTLPPLRY       | NS1          | 1087  | 1096 | HLA-A*01:01 | 100% | Dengue virus 3 | ELISPOT             | IFNγ release  | Positive            | 1                                                                                      | 1           | 1          | 1         | 1            | 1          | 1          | 1          | 1          | 1          | 1           | 1          | 1        | 1            | 1          | 1          | 1        | 1            | 1        | 1        |
| 180738     | RYMGEDGCWV       | NS1          | 1095  | 1104 | HLA-A*24:02 | 100% | Dengue virus 3 | ELISPOT             | IFNγ release  | Positive            | 1                                                                                      | 1           | 1          | 1         | 1            | 1          | 1          | 1          | 1          | 1          | 1           | 1          | 1        | 1            | 1          | 1          | 1        | 1            | 1        | 1        |
| 182939     | EKENMMKSL        | NS1          | 1113  | 1122 | HLA-B*08:01 | 100% | Dengue virus 3 | ELISPOT             | IFNγ release  | Positive            | 1                                                                                      | 1           | 1          | 1         | 1            | 1          | 1          | 1          | 1          | 1          | 1           | 1          | 1        | 1            | 1          | 1          | 1        | 1            | 1        | 1        |
| 184685     | LKRTTYSGLK       | NS1          | 64    | 73   | HLA-B*08:01 | 100% | Dengue virus 3 | ELISPOT             | IFNγ release  | Positive            | 1                                                                                      | 1           | 1          | 1         | 1            | 1          | 1          | 1          | 1          | 1          | 1           | 1          | 1        | 1            | 1          | 1          | 1        | 1            | 1        | 1        |
| 185573     | RYMGEDGCW        | NS1          | 1095  | 1103 | HLA-A*24:02 | 100% | Dengue virus 3 | ELISPOT             | IFNγ release  | Positive            | 1                                                                                      | 1           | 1          | 1         | 1            | 1          | 1          | 1          | 1          | 1          | 1           | 1          | 1        | 1            | 1          | 1          | 1        | 1            | 1        | 1        |
| 185734     | SPKRLATAI        | NS1          | 811   | 819  | HLA-B*08:01 | 100% | Dengue virus 3 | ELISPOT             | IFNγ release  | Positive            | 1                                                                                      | 1           | 1          | 1         | 1            | 1          | 1          | 1          | 1          | 1          | 1           | 1          | 1        | 1            | 1          | 1          | 1        | 1            | 1        | 1        |
| 186175     | TWRDMAHTLI       | NS2a         | 1174  | 1183 | HLA-A*24:02 | 100% | Dengue virus 3 | ELISPOT             | IFNγ release  | Positive            | 1                                                                                      | 1           | 1          | 1         | 1            | 1          | 1          | 1          | 1          | 1          | 1           | 1          | 1        | 1            | 1          | 1          | 1        | 1            | 1        | 1        |
| 182917     | EKQFAAGR         | NS3          | 2083  | 2091 | HLA-A*33:01 | 100% | Dengue virus 3 | ELISPOT             | IFNγ release  | Positive            | 1                                                                                      | 1           | 1          | 1         | 1            | 1          | 1          | 1          | 1          | 1          | 1           | 1          | 1        | 1            | 1          | 1          | 1        | 1            | 1        | 1        |
| 186234     | VEWTKGEK         | NS3          | 2053  | 2062 | HLA-B*40:01 | 100% | Dengue virus 3 | ELISPOT             | IFNγ release  | Positive            | 1                                                                                      | 1           | 1          | 1         | 1            | 1          | 1          | 1          | 1          | 1          | 1           | 1          | 1        | 1            | 1          | 1          | 1        | 1            | 1        | 1        |
| 19434      | GESKRTVE         | NS3          | 2001  | 2009 | HLA-B7      | 100% | Dengue virus 3 | S1 chromium         | cytotoxicity  | Positive            | 1                                                                                      | 1           | 1          | 1         | 1            | 1          | 1          | 1          | 1          | 1          | 1           | 1          | 1        | 1            | 1          | 1          | 1        | 1            | 1        | 1        |
| 19435      | GESKRTVE         | NS3          | 211   | 220  | HLA-B*40:01 | 100% | Dengue virus 3 | ICS                 | IFNγ release  | Positive            | 1                                                                                      | 1           | 1          | 1         | 1            | 1          | 1          | 1          | 1          | 1          | 1           | 1          | 1        | 1            | 1          | 1          | 1        | 1            | 1        | 1        |
| 22820      | GTSGSPINR        | NS3          | 133   | 142  | HLA-A*11:01 | 100% | Dengue virus 3 | S1 chromium         | cytotoxicity  | Positive            | 1                                                                                      | 1           | 1          | 1         | 1            | 1          | 1          | 1          | 1          | 1          | 1           | 1          | 1        | 1            | 1          | 1          | 1        | 1            | 1        | 1        |
| 22821      | GTSGSPINR        | NS3          | 133   | 143  | HLA-A11     | 100% | Dengue virus 3 | ICS                 | IFNγ release  | Positive            | 1                                                                                      | 1           | 1          | 1         | 1            | 1          | 1          | 1          | 1          | 1          | 1           | 1          | 1        | 1            | 1          | 1          | 1        | 1            | 1        | 1        |
| 34605      | KYTDRKWCF        | NS3          | 240   | 248  | HLA-A24     | 100% | Dengue virus 3 | ELISPOT             | IFNγ release  | Positive            | 1                                                                                      | 1           | 1          | 1         | 1            | 1          | 1          | 1          | 1          | 1          | 1           | 1          | 1        | 1            | 1          | 1          | 1        | 1            | 1        | 1        |
| 62183      | SVKKDUSY         | NS3          | 71    | 79   | HLA-B62     | 100% | Dengue virus 3 | S1 chromium         | cytotoxicity  | Positive            | 1                                                                                      | 1           | 1          | 1         | 1            | 1          | 1          | 1          | 1          | 1          | 1           | 1          | 1        | 1            | 1          | 1          | 1        | 1            | 1        | 1        |
| 183165     | FFMMVLLIPE       | NS4a         | 2205  | 2214 | HLA-A*33:01 | 100% | Dengue virus 3 | ELISPOT             | IFNγ release  | Positive            | 1                                                                                      | 1           | 1          | 1         | 1            | 1          | 1          | 1          | 1          | 1          | 1           | 1          | 1        | 1            | 1          | 1          | 1        | 1            | 1        | 1        |
| 183796     | IMKSVGTGK        | NS4b         | 2481  | 2489 | HLA-A*03:01 | 100% | Dengue virus 3 | ELISPOT             | IFNγ release  | Positive            | 1                                                                                      | 1           | 1          | 1         | 1            | 1          | 1          | 1          | 1          | 1          | 1           | 1          | 1        | 1            | 1          | 1          | 1        | 1            | 1        | 1        |
| 37534      | LLLMRTSWA        | NS4b         | 2423  | 2431 | HLA-A2      | 100% | Dengue virus 3 | biological activity | proliferation | Positive            | 1                                                                                      | 1           | 1          | 1         | 1            | 1          | 1          | 1          | 1          | 1          | 1           | 1          | 1        | 1            | 1          | 1          | 1        | 1            | 1        | 1        |
| 1807501    | KPIDDRFAN        | NS5          | 3158  | 3166 | HLA-B*07:02 | 100% | Dengue virus 3 | ELISPOT             | IFNγ release  | Positive            | 1                                                                                      | 1           | 1          | 1         | 1            | 1          | 1          | 1          | 1          | 1          | 1           | 1          | 1        | 1            | 1          | 1          | 1        | 1            | 1        | 1        |
| 180650     | METAEWLV         | NS5          | 2863  | 2871 | HLA-B*58:01 | 100% | Dengue virus 3 | ELISPOT             | IFNγ release  | Positive            | 1                                                                                      | 1           | 1          | 1         | 1            | 1          | 1          | 1          | 1          | 1          | 1           | 1          | 1        | 1            | 1          | 1          | 1        | 1            | 1        | 1        |
| 180728     | RPRLCTREFE       | NS5          | 2879  | 2888 | HLA-B*07:02 | 100% | Dengue virus 3 | ELISPOT             | IFNγ release  | Positive            | 1                                                                                      | 1           | 1          | 1         | 1            | 1          | 1          | 1          | 1          | 1          | 1           | 1          | 1        | 1            | 1          | 1          | 1        | 1            | 1        | 1        |
| 182553     | ALLALNDMGK       | NS5          | 3167  | 3176 | HLA-A*03:01 | 100% | Dengue virus 3 | ELISPOT             | IFNγ release  | Positive            | 1                                                                                      | 1           | 1          | 1         | 1            | 1          | 1          | 1          | 1          | 1          | 1           | 1          | 1        | 1            | 1          | 1          | 1        | 1            | 1        | 1        |



### CD8 DENV-4 Epitopes

|            |                      |              |       |      |             |      |                |                  |              |                     | NCBI IDs of DENV-4 circulating strains from India, (100% identity=1, green ; else 0, red) |          |          |            |            |            |           |           |          |
|------------|----------------------|--------------|-------|------|-------------|------|----------------|------------------|--------------|---------------------|-------------------------------------------------------------------------------------------|----------|----------|------------|------------|------------|-----------|-----------|----------|
| Epitope_ID | AA_Seq               | Protein_Name | Start | End  | Allele      | step | Serotype       | Method/Technique | Assay Group  | Qualitative Measure | AVW85694                                                                                  | AVW85695 | AVW85696 | AF240130.1 | ANCS7613.1 | CBAS7536.1 | CC20687.1 | AR81829.1 | QD258859 |
| 180810     | VTYECPLLV            | PreM         | 162   | 170  | HLA-A*02:01 | 0%   | Dengue virus 4 | ELISPOT          | IFNg release | Positive            | 0                                                                                         | 0        | 0        | 0          | 0          | 0          | 0         | 0         | 0        |
| 182707     | CNLTSTWVMY           | PreM         | 181   | 190  | HLA-A*30:02 | 0%   | Dengue virus 4 | ELISPOT          | IFNg release | Positive            | 0                                                                                         | 0        | 0        | 0          | 0          | 0          | 0         | 0         | 0        |
| 186303     | VLMMLVAPSY           | PreM         | 17    | 26   | HLA-B*15:01 | 0%   | Dengue virus 4 | ELISPOT          | IFNg release | Positive            | 0                                                                                         | 0        | 0        | 0          | 0          | 0          | 0         | 0         | 0        |
| 185147     | NYKERMMVTF           | E            | 511   | 519  | HLA-A*24:02 | 0%   | Dengue virus 4 | ELISPOT          | IFNg release | Positive            | 0                                                                                         | 0        | 0        | 0          | 0          | 0          | 0         | 0         | 0        |
| 185817     | SWMIRILIGF           | E            | 161   | 170  | HLA-A*24:02 | 0%   | Dengue virus 4 | ELISPOT          | IFNg release | Positive            | 0                                                                                         | 0        | 0        | 0          | 0          | 0          | 0         | 0         | 0        |
| 240130     | PPASDLKYSW           | NS1          | 880   | 889  | HLA-B*53:01 | 0%   | Dengue virus 4 | ELISPOT          | IFNg release | Positive            | 0                                                                                         | 0        | 0        | 0          | 0          | 0          | 0         | 0         | 0        |
| 167725     | AMTTTSLIPHDLMELIDGIS | NS2a         | 50    | 69   | HLA class I | 0%   | Dengue virus 4 | ELISPOT          | IFNg release | Positive            | 0                                                                                         | 0        | 0        | 0          | 0          | 0          | 0         | 0         | 0        |
| 239411     | ALWYVWQVK            | NS2b         | 1463  | 1471 | HLA-A*03:01 | 0%   | Dengue virus 4 | ELISPOT          | IFNg release | Positive            | 0                                                                                         | 0        | 0        | 0          | 0          | 0          | 0         | 0         | 0        |
| 418991     | IPVTMALWY            | NS2b         | 1458  | 1466 | HLA-B*35:01 | 0%   | Dengue virus 4 | ELISPOT          | IFNg release | Positive            | 0                                                                                         | 0        | 0        | 0          | 0          | 0          | 0         | 0         | 0        |
| 180640     | MALKDFKEF            | NS3          | 2079  | 2087 | HLA-B*35:01 | 0%   | Dengue virus 4 | ELISPOT          | IFNg release | Positive            | 0                                                                                         | 0        | 0        | 0          | 0          | 0          | 0         | 0         | 0        |
| 182563     | ALSEGVYRI            | NS3          | 1491  | 1499 | HLA-A*02:01 | 0%   | Dengue virus 4 | ELISPOT          | IFNg release | Positive            | 0                                                                                         | 0        | 0        | 0          | 0          | 0          | 0         | 0         | 0        |
| 186008     | TPPGATDPF            | NS3          | 1791  | 1799 | HLA-B*35:01 | 0%   | Dengue virus 4 | ELISPOT          | IFNg release | Positive            | 0                                                                                         | 0        | 0        | 0          | 0          | 0          | 0         | 0         | 0        |
| 186602     | YSDPLALRE            | NS3          | 2077  | 2085 | HLA-A*01:01 | 0%   | Dengue virus 4 | ELISPOT          | IFNg release | Positive            | 0                                                                                         | 0        | 0        | 0          | 0          | 0          | 0         | 0         | 0        |
| 239768     | GTSGSPIINK           | NS3          | 1607  | 1616 | HLA-A*03:01 | 0%   | Dengue virus 4 | ELISPOT          | IFNg release | Positive            | 0                                                                                         | 0        | 0        | 0          | 0          | 0          | 0         | 0         | 0        |
| 180383     | ATGPVLT LW           | NS4b         | 2436  | 2444 | HLA-B*58:01 | 0%   | Dengue virus 4 | ELISPOT          | IFNg release | Positive            | 0                                                                                         | 0        | 0        | 0          | 0          | 0          | 0         | 0         | 0        |
| 180587     | LATGPVLT LW          | NS4b         | 2435  | 2444 | HLA-B*53:01 | 0%   | Dengue virus 4 | ELISPOT          | IFNg release | Positive            | 0                                                                                         | 0        | 0        | 0          | 0          | 0          | 0         | 0         | 0        |
| 184375     | LGKSYAQMW            | NS5          | 3246  | 3254 | HLA-B*57:01 | 0%   | Dengue virus 4 | ELISPOT          | IFNg release | Positive            | 0                                                                                         | 0        | 0        | 0          | 0          | 0          | 0         | 0         | 0        |
| 419017     | MPAMKRYAP            | NS5          | 3371  | 3380 | HLA-B*35:01 | 0%   | Dengue virus 4 | ELISPOT          | IFNg release | Positive            | 0                                                                                         | 0        | 0        | 0          | 0          | 0          | 0         | 0         | 0        |
| 419048     | SPRLCTREEF           | NS5          | 2877  | 2886 | HLA-B*07:02 | 0%   | Dengue virus 4 | ELISPOT          | IFNg release | Positive            | 0                                                                                         | 0        | 0        | 0          | 0          | 0          | 0         | 0         | 0        |
| 182971     | EMCEDTVTY            | PreM         | 156   | 164  | HLA-B*35:01 | 100% | Dengue virus 4 | ELISPOT          | IFNg release | Positive            | 1                                                                                         | 1        | 1        | 1          | 1          | 1          | 1         | 1         | 1        |
| 583701     | GVSGGAWVDLVLEHGGCV   | E            | 14    | 31   | HLA class I | 100% | Dengue virus 4 | ICS              | IFNg release | Positive-Low        | 1                                                                                         | 1        | 1        | 1          | 1          | 1          | 1         | 1         | 1        |
| 183667     | IEKASLIEV            | NS1          | 986   | 994  | HLA-B*40:01 | 100% | Dengue virus 4 | ELISPOT          | IFNg release | Positive            | 1                                                                                         | 1        | 1        | 1          | 1          | 1          | 1         | 1         | 1        |
| 185050     | NFLEVEDYGF           | NS1          | 925   | 934  | HLA-A*24:02 | 100% | Dengue virus 4 | ELISPOT          | IFNg release | Positive            | 1                                                                                         | 1        | 1        | 1          | 1          | 1          | 1         | 1         | 1        |
| 182562     | ALPVYLMTL            | NS2a         | 1329  | 1337 | HLA-A*02:01 | 100% | Dengue virus 4 | ELISPOT          | IFNg release | Positive            | 1                                                                                         | 1        | 1        | 1          | 1          | 1          | 1         | 1         | 1        |
| 184566     | LPVYLMTLMK           | NS2a         | 1330  | 1339 | HLA-B*35:01 | 100% | Dengue virus 4 | ELISPOT          | IFNg release | Positive            | 1                                                                                         | 1        | 1        | 1          | 1          | 1          | 1         | 1         | 1        |
| 182901     | EETNMITLL            | NS2b         | 1434  | 1442 | HLA-B*40:01 | 100% | Dengue virus 4 | ELISPOT          | IFNg release | Positive            | 1                                                                                         | 1        | 1        | 1          | 1          | 1          | 1         | 1         | 1        |
| 186584     | YPLAIPVTM            | NS2b         | 1454  | 1462 | HLA-B*53:01 | 100% | Dengue virus 4 | ELISPOT          | IFNg release | Positive            | 1                                                                                         | 1        | 1        | 1          | 1          | 1          | 1         | 1         | 1        |
| 156711     | LAPTRVVAEMEEL        | NS3          | 1695  | 1709 | HLA-B7      | 100% | Dengue virus 4 | 51 chromium      | cytotoxicity | Positive            | 1                                                                                         | 1        | 1        | 1          | 1          | 1          | 1         | 1         | 1        |
| 180473     | GFRLRGEQR            | NS3          | 1995  | 2004 | HLA-B*40:01 | 100% | Dengue virus 4 | ELISPOT          | IFNg release | Positive            | 1                                                                                         | 1        | 1        | 1          | 1          | 1          | 1         | 1         | 1        |
| 180648     | MEGVFHTMW            | NS3          | 1516  | 1524 | HLA-B*44:03 | 100% | Dengue virus 4 | ELISPOT          | IFNg release | Positive            | 1                                                                                         | 1        | 1        | 1          | 1          | 1          | 1         | 1         | 1        |
| 180778     | TPEGIPTLF            | NS3          | 1974  | 1983 | HLA-B*07:02 | 100% | Dengue virus 4 | ELISPOT          | IFNg release | Positive            | 1                                                                                         | 1        | 1        | 1          | 1          | 1          | 1         | 1         | 1        |
| 180843     | YPKTKLTDWD           | NS3          | 1868  | 1877 | HLA-B*35:01 | 100% | Dengue virus 4 | ELISPOT          | IFNg release | Positive            | 1                                                                                         | 1        | 1        | 1          | 1          | 1          | 1         | 1         | 1        |
| 182919     | EFRLRGEQR            | NS3          | 1996  | 2004 | HLA-A*33:01 | 100% | Dengue virus 4 | ELISPOT          | IFNg release | Positive            | 1                                                                                         | 1        | 1        | 1          | 1          | 1          | 1         | 1         | 1        |
| 183407     | GLFGKTQGVG           | NS3          | 1503  | 1512 | HLA-A*02:01 | 100% | Dengue virus 4 | ELISPOT          | IFNg release | Positive            | 1                                                                                         | 1        | 1        | 1          | 1          | 1          | 1         | 1         | 1        |
| 183427     | GLYGNGVVTK           | NS3          | 1622  | 1631 | HLA-A*03:01 | 100% | Dengue virus 4 | ELISPOT          | IFNg release | Positive            | 1                                                                                         | 1        | 1        | 1          | 1          | 1          | 1         | 1         | 1        |
| 184079     | KLTDWDFVW            | NS3          | 398   | 406  | HLA-A*02:01 | 100% | Dengue virus 4 | ELISPOT          | IFNg release | Positive            | 1                                                                                         | 1        | 1        | 1          | 1          | 1          | 1         | 1         | 1        |
| 186347     | VPNNYLIVM            | NS3          | 1749  | 1757 | HLA-B*35:01 | 100% | Dengue virus 4 | ELISPOT          | IFNg release | Positive            | 1                                                                                         | 1        | 1        | 1          | 1          | 1          | 1         | 1         | 1        |
| 195838     | PNYNLIVMDEAHFTD      | NS3          | 1750  | 1764 | HLA class I | 100% | Dengue virus 4 | ICS              | IFNg release | Positive            | 1                                                                                         | 1        | 1        | 1          | 1          | 1          | 1         | 1         | 1        |
| 22822      | GTSGSPIINRK          | NS3          | 133   | 143  | HLA-A11     | 100% | Dengue virus 4 | 51 chromium      | cytotoxicity | Positive            | 1                                                                                         | 1        | 1        | 1          | 1          | 1          | 1         | 1         | 1        |
| 34918      | LAPTRVVAEME          | NS3          | 221   | 232  | HLA-B7      | 100% | Dengue virus 4 | 51 chromium      | cytotoxicity | Positive            | 1                                                                                         | 1        | 1        | 1          | 1          | 1          | 1         | 1         | 1        |
| 539058     | AHFTDPSSVAARGYST     | NS3          | 1760  | 1776 | HLA class I | 100% | Dengue virus 4 | ICS              | IFNg release | Positive            | 1                                                                                         | 1        | 1        | 1          | 1          | 1          | 1         | 1         | 1        |
| 539576     | LIVMDEAHFTDPSSVAA    | NS3          | 1754  | 1770 | HLA class I | 100% | Dengue virus 4 | ICS              | IFNg release | Positive            | 1                                                                                         | 1        | 1        | 1          | 1          | 1          | 1         | 1         | 1        |
| 540029     | VEMGEAAAFMTATPPG     | NS3          | 1778  | 1794 | HLA class I | 100% | Dengue virus 4 | ICS              | IFNg release | Positive            | 1                                                                                         | 1        | 1        | 1          | 1          | 1          | 1         | 1         | 1        |
| 581940     | APTRVVAEMEELRGL      | NS3          | 1558  | 1574 | HLA class I | 100% | Dengue virus 4 | ICS              | IFNg release | Positive-Low        | 1                                                                                         | 1        | 1        | 1          | 1          | 1          | 1         | 1         | 1        |
| 65552      | TPEGIPTLF            | NS3          | 500   | 508  | HLA-B*35:01 | 100% | Dengue virus 4 | 51 chromium      | cytotoxicity | Positive            | 1                                                                                         | 1        | 1        | 1          | 1          | 1          | 1         | 1         | 1        |
| 182926     | EIASLPTYL            | NS4a         | 2101  | 2109 | HLA-A*68:02 | 100% | Dengue virus 4 | ELISPOT          | IFNg release | Positive            | 1                                                                                         | 1        | 1        | 1          | 1          | 1          | 1         | 1         | 1        |
| 184531     | LPESLETML            | NS4a         | 2140  | 2149 | HLA-B*35:01 | 100% | Dengue virus 4 | ELISPOT          | IFNg release | Positive            | 1                                                                                         | 1        | 1        | 1          | 1          | 1          | 1         | 1         | 1        |
| 185881     | TEIASLPTYL           | NS4a         | 2100  | 2109 | HLA-B*40:01 | 100% | Dengue virus 4 | ELISPOT          | IFNg release | Positive            | 1                                                                                         | 1        | 1        | 1          | 1          | 1          | 1         | 1         | 1        |
| 186620     | YVILTILT             | NS4a         | 2228  | 2236 | HLA-A*24:02 | 100% | Dengue virus 4 | ELISPOT          | IFNg release | Positive            | 1                                                                                         | 1        | 1        | 1          | 1          | 1          | 1         | 1         | 1        |
| 150647     | TPMLRHTIEN           | NS4b         | 2288  | 2297 | HLA-B*07:02 | 100% | Dengue virus 4 | ELISPOT          | IFNg release | Positive            | 1                                                                                         | 1        | 1        | 1          | 1          | 1          | 1         | 1         | 1        |
| 180379     | ATGPILT LW           | NS4b         | 2436  | 2444 | HLA-B*58:01 | 100% | Dengue virus 4 | ELISPOT          | IFNg release | Positive            | 1                                                                                         | 1        | 1        | 1          | 1          | 1          | 1         | 1         | 1        |
| 180764     | TETITLVDL            | NS4b         | 2262  | 2271 | HLA-B*40:01 | 100% | Dengue virus 4 | ELISPOT          | IFNg release | Positive            | 1                                                                                         | 1        | 1        | 1          | 1          | 1          | 1         | 1         | 1        |
| 180803     | VPLLAMGCY            | NS4b         | 2330  | 2338 | HLA-B*35:01 | 100% | Dengue virus 4 | ELISPOT          | IFNg release | Positive            | 1                                                                                         | 1        | 1        | 1          | 1          | 1          | 1         | 1         | 1        |
| 183672     | IENTSANLSL           | NS4b         | 2295  | 2304 | HLA-B*40:01 | 100% | Dengue virus 4 | ELISPOT          | IFNg release | Positive            | 1                                                                                         | 1        | 1        | 1          | 1          | 1          | 1         | 1         | 1        |
| 184453     | LLLMRTTWAF           | NS4b         | 2420  | 2429 | HLA-A*24:02 | 100% | Dengue virus 4 | ELISPOT          | IFNg release | Positive            | 1                                                                                         | 1        | 1        | 1          | 1          | 1          | 1         | 1         | 1        |
| 184713     | LYAVATITL            | NS4b         | 2279  | 2287 | HLA-A*24:02 | 100% | Dengue virus 4 | ELISPOT          | IFNg release | Positive            | 1                                                                                         | 1        | 1        | 1          | 1          | 1          | 1         | 1         | 1        |
| 186330     | VMLLVHYAI            | NS4b         | 2351  | 2359 | HLA-A*24:02 | 100% | Dengue virus 4 | ELISPOT          | IFNg release | Positive            | 1                                                                                         | 1        | 1        | 1          | 1          | 1          | 1         | 1         | 1        |



|         |                   |      |      |      |             |             |                |         |              |          |   |   |   |   |   |   |   |   |
|---------|-------------------|------|------|------|-------------|-------------|----------------|---------|--------------|----------|---|---|---|---|---|---|---|---|
| 37535   | LLLMRTTWA         | NS4b | 76   | 84   | HLA-A2      | 100%        | Dengue virus 4 | ICS     | TNF release  | Positive | 1 | 1 | 1 | 1 | 1 | 1 | 1 | 1 |
| 40472   | LVMLLVHYA         | NS4b | 6    | 14   | HLA-A2      | 100%        | Dengue virus 4 | ICS     | IFNg release | Positive | 1 | 1 | 1 | 1 | 1 | 1 | 1 | 1 |
| 1067215 | HSWEDIPYL         | NS5  | 3319 | 3327 | HLA-A*02:01 | 100%        | Dengue virus 4 | ELISPOT | IFNg release | Positive | 1 | 1 | 1 | 1 | 1 | 1 | 1 | 1 |
| 180684  | NPRLCTREEF        | NS5  | 2877 | 2886 | HLA-B*07:02 | 100%        | Dengue virus 4 | ELISPOT | IFNg release | Positive | 1 | 1 | 1 | 1 | 1 | 1 | 1 | 1 |
| 180718  | REDLWCGSL         | NS5  | 3330 | 3338 | HLA-B*40:01 | 100%        | Dengue virus 4 | ELISPOT | IFNg release | Positive | 1 | 1 | 1 | 1 | 1 | 1 | 1 | 1 |
| 183353  | GESSNPTI          | NS5  | 2635 | 2643 | HLA-B*44:02 | 100%        | Dengue virus 4 | ELISPOT | IFNg release | Positive | 1 | 1 | 1 | 1 | 1 | 1 | 1 | 1 |
| 183570  | HEMYWVSGV         | NS5  | 2703 | 2711 | HLA-B*44:02 | 100%        | Dengue virus 4 | ELISPOT | IFNg release | Positive | 1 | 1 | 1 | 1 | 1 | 1 | 1 | 1 |
| 184051  | KLGEFGRK          | NS5  | 2948 | 2956 | HLA-A*03:01 | 100%        | Dengue virus 4 | ELISPOT | IFNg release | Positive | 1 | 1 | 1 | 1 | 1 | 1 | 1 | 1 |
| 184130  | KREDLWCGSL        | NS5  | 3329 | 3338 | HLA-B*08:01 | 100%        | Dengue virus 4 | ELISPOT | IFNg release | Positive | 1 | 1 | 1 | 1 | 1 | 1 | 1 | 1 |
| 184954  | MTTEDMLKVW        | NS5  | 3292 | 3301 | HLA class I | 100%        | Dengue virus 4 | ICS     | IFNg release | Positive | 1 | 1 | 1 | 1 | 1 | 1 | 1 | 1 |
| 186453  | WEPKSGWKNNW       | NS5  | 3182 | 3191 | HLA-B*44:02 | 100%        | Dengue virus 4 | ELISPOT | IFNg release | Positive | 1 | 1 | 1 | 1 | 1 | 1 | 1 | 1 |
| 186550  | YDQENPYRTW        | NS5  | 2781 | 2790 | HLA-B*44:02 | 100%        | Dengue virus 4 | ELISPOT | IFNg release | Positive | 1 | 1 | 1 | 1 | 1 | 1 | 1 | 1 |
| 186640  | YYMATLKNNV        | NS5  | 2576 | 2584 | HLA-A*24:02 | 100%        | Dengue virus 4 | ELISPOT | IFNg release | Positive | 1 | 1 | 1 | 1 | 1 | 1 | 1 | 1 |
| 186641  | YYMATLKNVT        | NS5  | 2576 | 2585 | HLA-A*24:02 | 100%        | Dengue virus 4 | ELISPOT | IFNg release | Positive | 1 | 1 | 1 | 1 | 1 | 1 | 1 | 1 |
| 539656  | MAISGDDCVVKPLDERF | NS5  | 3146 | 3162 | HLA class I | 100%        | Dengue virus 4 | ICS     | IFNg release | Positive | 1 | 1 | 1 | 1 | 1 | 1 | 1 | 1 |
| 539703  | MVTQLAMTDITPFGQQR | NS5  | 2824 | 2840 | HLA class I | 100%        | Dengue virus 4 | ICS     | IFNg release | Positive | 1 | 1 | 1 | 1 | 1 | 1 | 1 | 1 |
| 180475  | GEQRKTFVEL        | NS3  | 2001 | 2010 | HLA-B*40:01 | 81% - <100% | Dengue virus 4 | ELISPOT | IFNg release | Positive | 1 | 1 | 1 | 1 | 1 | 1 | 0 | 1 |
| 183231  | FPQSNSPIED        | NS3  | 1799 | 1808 | HLA-B*35:01 | 81% - <100% | Dengue virus 4 | ELISPOT | IFNg release | Positive | 1 | 1 | 1 | 1 | 1 | 1 | 0 | 1 |
| 183338  | GEIGAVTLDF        | NS3  | 1595 | 1604 | HLA-B*44:03 | 81% - <100% | Dengue virus 4 | ELISPOT | IFNg release | Positive | 1 | 1 | 1 | 1 | 1 | 0 | 1 | 1 |
| 62616   | SYKDREWCF         | NS3  | 389  | 397  | HLA-A24     | 81% - <100% | Dengue virus 4 | ELISPOT | IFNg release | Positive | 1 | 1 | 1 | 1 | 1 | 1 | 0 | 1 |
| 180596  | LETLMVALL         | NS4a | 2144 | 2153 | HLA-B*40:01 | 81% - <100% | Dengue virus 4 | ELISPOT | IFNg release | Positive | 1 | 1 | 1 | 0 | 1 | 1 | 1 | 1 |
| 182508  | AIASVGLLW         | NS4a | 2179 | 2188 | HLA-B*44:02 | 81% - <100% | Dengue virus 4 | ELISPOT | IFNg release | Positive | 1 | 1 | 1 | 1 | 1 | 0 | 1 | 1 |
| 183650  | IAVASGLLW         | NS4a | 2180 | 2188 | HLA-B*57:01 | 81% - <100% | Dengue virus 4 | ELISPOT | IFNg release | Positive | 1 | 1 | 1 | 1 | 1 | 0 | 1 | 1 |
| 42083   | MLVALLGAM         | NS4a | 56   | 64   | HLA-A2      | 81% - <100% | Dengue virus 4 | ICS     | IFNg release | Positive | 1 | 1 | 1 | 1 | 0 | 1 | 1 | 1 |
| 136826  | CYSQVNPTTL        | NS4b | 2337 | 2346 | HLA-A*24:02 | 81% - <100% | Dengue virus 4 | ELISPOT | IFNg release | Positive | 1 | 1 | 1 | 1 | 1 | 0 | 1 | 1 |
| 150548  | RSNAAIGAVF        | NS5  | 2891 | 2900 | HLA-B*15:01 | 81% - <100% | Dengue virus 4 | ELISPOT | IFNg release | Positive | 1 | 1 | 1 | 1 | 0 | 1 | 1 | 1 |
| 185232  | QEEHKETWHY        | NS5  | 2772 | 2781 | HLA-B*44:02 | 81% - <100% | Dengue virus 4 | ELISPOT | IFNg release | Positive | 1 | 1 | 1 | 1 | 1 | 0 | 1 | 1 |
| 539149  | DCVVKPLDERFSTSLLF | NS5  | 3152 | 3168 | HLA class I | 81% - <100% | Dengue virus 4 | ICS     | IFNg release | Positive | 1 | 1 | 1 | 1 | 1 | 0 | 1 | 1 |
| 184591  | LSIPHDLMEF        | NS2a | 1239 | 1248 | HLA-A*01:01 | 51%-80%     | Dengue virus 4 | ELISPOT | IFNg release | Positive | 0 | 1 | 1 | 1 | 1 | 1 | 0 | 0 |
| 180850  | YTPGIIPTL         | NS3  | 1973 | 1982 | HLA-A*02:06 | 51%-80%     | Dengue virus 4 | ELISPOT | IFNg release | Positive | 0 | 1 | 0 | 1 | 1 | 1 | 1 | 1 |
| 180541  | ITLLCLIPTV        | C    | 102  | 111  | HLA-A*02:01 | >0% - 50%   | Dengue virus 4 | ELISPOT | IFNg release | Positive | 1 | 0 | 0 | 0 | 1 | 1 | 0 | 0 |
| 183818  | IPHDLMELI         | NS2a | 1241 | 1249 | HLA-B*53:01 | >0% - 50%   | Dengue virus 4 | ELISPOT | IFNg release | Positive | 1 | 0 | 0 | 0 | 0 | 1 | 1 | 0 |
| 184390  | LIDGISLGL         | NS2a | 1248 | 1256 | HLA-A*01:01 | >0% - 50%   | Dengue virus 4 | ELISPOT | IFNg release | Positive | 1 | 0 | 0 | 0 | 0 | 1 | 1 | 0 |



**Supplementary Table S4. Globally reported dengue specific CD4 and CD8 T cell epitopes that are present in each of the six different dengue vaccine candidates.** Detailed information of the full-length sequences of the vaccine constructs for each of the six vaccines and all four serotypes within each vaccine is provided. Next, portion provides the identity of each of the globally reported CD4 epitopes and CD8 epitopes in each of the six vaccine candidates. Green color shade and number 1 indicates 100% identity in the given vaccine construct. Pink color shade and number zero indicates not identical in the given vaccine construct.



### Vaccine Information

|        | Accession   | Strain name                        | NCBI ID     | Country | Complete Sequence | AA Seq                                                                                                                                                                                                                                                                                                                                                                                                                                                                                                                                                                                                                                                                                                                                                                                                                                                                                                                                                                                                                                                                                                                                                                                                                                                                                                                                                                                                                                                                                                                                                                                                                                                                                                                                                                                                                                                                                                                                                                                                                                                                                                                                                                                                                                                                                                                                                                                                                                                                                                                                                                                                                                                                                                                                                                                                                                                                                                                                                                                                                                                                                                                                                                                                                                                                                                                                                                                                                                                                                                                                                                                                                                                                                                                                                                                                                                                                                                                                                                                                                                                                                                                                                                                                                                                                                                                                                                                                                                                                                                                                                                                                                                                                                                                                                                                                                                                                                                                                                                                                                                                                                                                                                                                                                                                                                                                                                                                                                                                                                                                                                                                                                                                                                                                                                                                                                                                                                                                                                                                                                                                                                                                                                                                                                                                                                                                                                                                                                                                                                                                                                                                                                                                                                                              |
|--------|-------------|------------------------------------|-------------|---------|-------------------|---------------------------------------------------------------------------------------------------------------------------------------------------------------------------------------------------------------------------------------------------------------------------------------------------------------------------------------------------------------------------------------------------------------------------------------------------------------------------------------------------------------------------------------------------------------------------------------------------------------------------------------------------------------------------------------------------------------------------------------------------------------------------------------------------------------------------------------------------------------------------------------------------------------------------------------------------------------------------------------------------------------------------------------------------------------------------------------------------------------------------------------------------------------------------------------------------------------------------------------------------------------------------------------------------------------------------------------------------------------------------------------------------------------------------------------------------------------------------------------------------------------------------------------------------------------------------------------------------------------------------------------------------------------------------------------------------------------------------------------------------------------------------------------------------------------------------------------------------------------------------------------------------------------------------------------------------------------------------------------------------------------------------------------------------------------------------------------------------------------------------------------------------------------------------------------------------------------------------------------------------------------------------------------------------------------------------------------------------------------------------------------------------------------------------------------------------------------------------------------------------------------------------------------------------------------------------------------------------------------------------------------------------------------------------------------------------------------------------------------------------------------------------------------------------------------------------------------------------------------------------------------------------------------------------------------------------------------------------------------------------------------------------------------------------------------------------------------------------------------------------------------------------------------------------------------------------------------------------------------------------------------------------------------------------------------------------------------------------------------------------------------------------------------------------------------------------------------------------------------------------------------------------------------------------------------------------------------------------------------------------------------------------------------------------------------------------------------------------------------------------------------------------------------------------------------------------------------------------------------------------------------------------------------------------------------------------------------------------------------------------------------------------------------------------------------------------------------------------------------------------------------------------------------------------------------------------------------------------------------------------------------------------------------------------------------------------------------------------------------------------------------------------------------------------------------------------------------------------------------------------------------------------------------------------------------------------------------------------------------------------------------------------------------------------------------------------------------------------------------------------------------------------------------------------------------------------------------------------------------------------------------------------------------------------------------------------------------------------------------------------------------------------------------------------------------------------------------------------------------------------------------------------------------------------------------------------------------------------------------------------------------------------------------------------------------------------------------------------------------------------------------------------------------------------------------------------------------------------------------------------------------------------------------------------------------------------------------------------------------------------------------------------------------------------------------------------------------------------------------------------------------------------------------------------------------------------------------------------------------------------------------------------------------------------------------------------------------------------------------------------------------------------------------------------------------------------------------------------------------------------------------------------------------------------------------------------------------------------------------------------------------------------------------------------------------------------------------------------------------------------------------------------------------------------------------------------------------------------------------------------------------------------------------------------------------------------------------------------------------------------------------------------------------------------------------------------------------------|
| DENV-1 | NAU054343.1 | Naura Island Western Pacific 4542S | NP_054343.1 | N/A     | Yes               | MINNQRKGTGPPSNMLKRRNRNVSTGQAKRFSGLGSGDGPMLVMAAFILRFLPATTAGLAWGTGSKXANVLGRFKESNMNNRRKRSYTMLLMLPTLAHLTRTGGEPHVMVSGKRGSKLLTSKAGVMCTLUMDGLGEMDCTMYKCPTRTEEDVDCVNCATNEVTVYTCQGTGGEHRDRKRSVALPHVGLGTRTETVMSSEGAAGKQIVETWALRHPGTGTFIALFAHGTSTQGVITFLLVPTSPAMMRVCYGNDRVNEGVSATVVDVHSGCTVMAKNPTDLIELKTETPAALRLCKEASNTTQPTGDEATVEEDTNGPKRVDYWGNGVGGNGGLGKSGATGCTCAKCYVFLKEDGQVHVKRTIVYVTHGGHGTQNETGHTTATTPQWQSLTDYQALTDLCSPHTGDNNMLTKMKXSVLWVKQDLPFLPWPGATGTSFTVMNRQDLVYTKTHAKRQVYLVGSGEGAMTALTATGTGTGTTFAGHLKRLAMDLLEGUQVYCTGSEGTGELAVTQNTLQVQKTEGAPCGSPGSDRGRNENLTVYPTKSPNEAPAGPTGSPKALAAAGVAGAKLSLWYKKGSSGGMKEFATARGARMALGDTAWDVGSGGVTGVLHGHTGTATGVLFGVSTVMKIGDITGLTWGLNKRSTLSMTCIAGVMNLYLVNQVAGQSCVNMVKRGLEKCGSGGTYNEVHTWTEQZQDAPSKRLAAGVANGWGCGRSARTLENNMVKQSNELNHLNEMDKMTVTVGDSVSGLAGGKKMRPQMKHVSXWKGKMGAGQITDTPDPTPEPCDNQKRWANVSDYEGDGTGFTWNLKKNDSYTKDCHRLMAAKSDAAVAMHAWSEKENTHAKLEASIFCYVTPPSHTLVSDNHLSESMIRPQKQSDKNRYQPTQDZAGVHNLGDNQVTVYVTVGSDVHNGKQVNTLQVQKTEGAPCGSPGSDRGRNENLTVYPTKSPNEAPAGPTGSPKALAAAGVAGAKLSLWYKKGSSGGMKEFATARGARMALGDTAWDVGSGGVTGVLHGHTGTATGVLFGVSTVMKIGDITGLTWGLNKRSTLSMTCIAGVMNLYLVNQVAGQSCVNMVKRGLEKCGSGGTYNEVHTWTEQZQDAPSKRLAAGVANGWGCGRSARTLENNMVKQSNELNHLNEMDKMTVTVGDSVSGLAGGKKMRPQMKHVSXWKGKMGAGQITDTPDPTPEPCDNQKRWANVSDYEGDGTGFTWNLKKNDSYTKDCHRLMAAKSDAAVAMHAWSEKENTHAKLEASIFCYVTPPSHTLVSDNHLSESMIRPQKQSDKNRYQPTQDZAGVHNLGDNQVTVYVTVGSDVHNGKQVNTLQVQKTEGAPCGSPGSDRGRNENLTVYPTKSPNEAPAGPTGSPKALAAAGVAGAKLSLWYKKGSSGGMKEFATARGARMALGDTAWDVGSGGVTGVLHGHTGTATGVLFGVSTVMKIGDITGLTWGLNKRSTLSMTCIAGVMNLYLVNQVAGQSCVNMVKRGLEKCGSGGTYNEVHTWTEQZQDAPSKRLAAGVANGWGCGRSARTLENNMVKQSNELNHLNEMDKMTVTVGDSVSGLAGGKKMRPQMKHVSXWKGKMGAGQITDTPDPTPEPCDNQKRWANVSDYEGDGTGFTWNLKKNDSYTKDCHRLMAAKSDAAVAMHAWSEKENTHAKLEASIFCYVTPPSHTLVSDNHLSESMIRPQKQSDKNRYQPTQDZAGVHNLGDNQVTVYVTVGSDVHNGKQVNTLQVQKTEGAPCGSPGSDRGRNENLTVYPTKSPNEAPAGPTGSPKALAAAGVAGAKLSLWYKKGSSGGMKEFATARGARMALGDTAWDVGSGGVTGVLHGHTGTATGVLFGVSTVMKIGDITGLTWGLNKRSTLSMTCIAGVMNLYLVNQVAGQSCVNMVKRGLEKCGSGGTYNEVHTWTEQZQDAPSKRLAAGVANGWGCGRSARTLENNMVKQSNELNHLNEMDKMTVTVGDSVSGLAGGKKMRPQMKHVSXWKGKMGAGQITDTPDPTPEPCDNQKRWANVSDYEGDGTGFTWNLKKNDSYTKDCHRLMAAKSDAAVAMHAWSEKENTHAKLEASIFCYVTPPSHTLVSDNHLSESMIRPQKQSDKNRYQPTQDZAGVHNLGDNQVTVYVTVGSDVHNGKQVNTLQVQKTEGAPCGSPGSDRGRNENLTVYPTKSPNEAPAGPTGSPKALAAAGVAGAKLSLWYKKGSSGGMKEFATARGARMALGDTAWDVGSGGVTGVLHGHTGTATGVLFGVSTVMKIGDITGLTWGLNKRSTLSMTCIAGVMNLYLVNQVAGQSCVNMVKRGLEKCGSGGTYNEVHTWTEQZQDAPSKRLAAGVANGWGCGRSARTLENNMVKQSNELNHLNEMDKMTVTVGDSVSGLAGGKKMRPQMKHVSXWKGKMGAGQITDTPDPTPEPCDNQKRWANVSDYEGDGTGFTWNLKKNDSYTKDCHRLMAAKSDAAVAMHAWSEKENTHAKLEASIFCYVTPPSHTLVSDNHLSESMIRPQKQSDKNRYQPTQDZAGVHNLGDNQVTVYVTVGSDVHNGKQVNTLQVQKTEGAPCGSPGSDRGRNENLTVYPTKSPNEAPAGPTGSPKALAAAGVAGAKLSLWYKKGSSGGMKEFATARGARMALGDTAWDVGSGGVTGVLHGHTGTATGVLFGVSTVMKIGDITGLTWGLNKRSTLSMTCIAGVMNLYLVNQVAGQSCVNMVKRGLEKCGSGGTYNEVHTWTEQZQDAPSKRLAAGVANGWGCGRSARTLENNMVKQSNELNHLNEMDKMTVTVGDSVSGLAGGKKMRPQMKHVSXWKGKMGAGQITDTPDPTPEPCDNQKRWANVSDYEGDGTGFTWNLKKNDSYTKDCHRLMAAKSDAAVAMHAWSEKENTHAKLEASIFCYVTPPSHTLVSDNHLSESMIRPQKQSDKNRYQPTQDZAGVHNLGDNQVTVYVTVGSDVHNGKQVNTLQVQKTEGAPCGSPGSDRGRNENLTVYPTKSPNEAPAGPTGSPKALAAAGVAGAKLSLWYKKGSSGGMKEFATARGARMALGDTAWDVGSGGVTGVLHGHTGTATGVLFGVSTVMKIGDITGLTWGLNKRSTLSMTCIAGVMNLYLVNQVAGQSCVNMVKRGLEKCGSGGTYNEVHTWTEQZQDAPSKRLAAGVANGWGCGRSARTLENNMVKQSNELNHLNEMDKMTVTVGDSVSGLAGGKKMRPQMKHVSXWKGKMGAGQITDTPDPTPEPCDNQKRWANVSDYEGDGTGFTWNLKKNDSYTKDCHRLMAAKSDAAVAMHAWSEKENTHAKLEASIFCYVTPPSHTLVSDNHLSESMIRPQKQSDKNRYQPTQDZAGVHNLGDNQVTVYVTVGSDVHNGKQVNTLQVQKTEGAPCGSPGSDRGRNENLTVYPTKSPNEAPAGPTGSPKALAAAGVAGAKLSLWYKKGSSGGMKEFATARGARMALGDTAWDVGSGGVTGVLHGHTGTATGVLFGVSTVMKIGDITGLTWGLNKRSTLSMTCIAGVMNLYLVNQVAGQSCVNMVKRGLEKCGSGGTYNEVHTWTEQZQDAPSKRLAAGVANGWGCGRSARTLENNMVKQSNELNHLNEMDKMTVTVGDSVSGLAGGKKMRPQMKHVSXWKGKMGAGQITDTPDPTPEPCDNQKRWANVSDYEGDGTGFTWNLKKNDSYTKDCHRLMAAKSDAAVAMHAWSEKENTHAKLEASIFCYVTPPSHTLVSDNHLSESMIRPQKQSDKNRYQPTQDZAGVHNLGDNQVTVYVTVGSDVHNGKQVNTLQVQKTEGAPCGSPGSDRGRNENLTVYPTKSPNEAPAGPTGSPKALAAAGVAGAKLSLWYKKGSSGGMKEFATARGARMALGDTAWDVGSGGVTGVLHGHTGTATGVLFGVSTVMKIGDITGLTWGLNKRSTLSMTCIAGVMNLYLVNQVAGQSCVNMVKRGLEKCGSGGTYNEVHTWTEQZQDAPSKRLAAGVANGWGCGRSARTLENNMVKQSNELNHLNEMDKMTVTVGDSVSGLAGGKKMRPQMKHVSXWKGKMGAGQITDTPDPTPEPCDNQKRWANVSDYEGDGTGFTWNLKKNDSYTKDCHRLMAAKSDAAVAMHAWSEKENTHAKLEASIFCYVTPPSHTLVSDNHLSESMIRPQKQSDKNRYQPTQDZAGVHNLGDNQVTVYVTVGSDVHNGKQVNTLQVQKTEGAPCGSPGSDRGRNENLTVYPTKSPNEAPAGPTGSPKALAAAGVAGAKLSLWYKKGSSGGMKEFATARGARMALGDTAWDVGSGGVTGVLHGHTGTATGVLFGVSTVMKIGDITGLTWGLNKRSTLSMTCIAGVMNLYLVNQVAGQSCVNMVKRGLEKCGSGGTYNEVHTWTEQZQDAPSKRLAAGVANGWGCGRSARTLENNMVKQSNELNHLNEMDKMTVTVGDSVSGLAGGKKMRPQMKHVSXWKGKMGAGQITDTPDPTPEPCDNQKRWANVSDYEGDGTGFTWNLKKNDSYTKDCHRLMAAKSDAAVAMHAWSEKENTHAKLEASIFCYVTPPSHTLVSDNHLSESMIRPQKQSDKNRYQPTQDZAGVHNLGDNQVTVYVTVGSDVHNGKQVNTLQVQKTEGAPCGSPGSDRGRNENLTVYPTKSPNEAPAGPTGSPKALAAAGVAGAKLSLWYKKGSSGGMKEFATARGARMALGDTAWDVGSGGVTGVLHGHTGTATGVLFGVSTVMKIGDITGLTWGLNKRSTLSMTCIAGVMNLYLVNQVAGQSCVNMVKRGLEKCGSGGTYNEVHTWTEQZQDAPSKRLAAGVANGWGCGRSARTLENNMVKQSNELNHLNEMDKMTVTVGDSVSGLAGGKKMRPQMKHVSXWKGKMGAGQITDTPDPTPEPCDNQKRWANVSDYEGDGTGFTWNLKKNDSYTKDCHRLMAAKSDAAVAMHAWSEKENTHAKLEASIFCYVTPPSHTLVSDNHLSESMIRPQKQSDKNRYQPTQDZAGVHNLGDNQVTVYVTVGSDVHNGKQVNTLQVQKTEGAPCGSPGSDRGRNENLTVYPTKSPNEAPAGPTGSPKALAAAGVAGAKLSLWYKKGSSGGMKEFATARGARMALGDTAWDVGSGGVTGVLHGHTGTATGVLFGVSTVMKIGDITGLTWGLNKRSTLSMTCIAGVMNLYLVNQVAGQSCVNMVKRGLEKCGSGGTYNEVHTWTEQZQDAPSKRLAAGVANGWGCGRSARTLENNMVKQSNELNHLNEMDKMTVTVGDSVSGLAGGKKMRPQMKHVSXWKGKMGAGQITDTPDPTPEPCDNQKRWANVSDYEGDGTGFTWNLKKNDSYTKDCHRLMAAKSDAAVAMHAWSEKENTHAKLEASIFCYVTPPSHTLVSDNHLSESMIRPQKQSDKNRYQPTQDZAGVHNLGDNQVTVYVTVGSDVHNGKQVNTLQVQKTEGAPCGSPGSDRGRNENLTVYPTKSPNEAPAGPTGSPKALAAAGVAGAKLSLWYKKGSSGGMKEFATARGARMALGDTAWDVGSGGVTGVLHGHTGTATGVLFGVSTVMKIGDITGLTWGLNKRSTLSMTCIAGVMNLYLVNQVAGQSCVNMVKRGLEKCGSGGTYNEVHTWTEQZQDAPSKRLAAGVANGWGCGRSARTLENNMVKQSNELNHLNEMDKMTVTVGDSVSGLAGGKKMRPQMKHVSXWKGKMGAGQITDTPDPTPEPCDNQKRWANVSDYEGDGTGFTWNLKKNDSYTKDCHRLMAAKSDAAVAMHAWSEKENTHAKLEASIFCYVTPPSHTLVSDNHLSESMIRPQKQSDKNRYQPTQDZAGVHNLGDNQVTVYVTVGSDVHNGKQVNTLQVQKTEGAPCGSPGSDRGRNENLTVYPTKSPNEAPAGPTGSPKALAAAGVAGAKLSLWYKKGSSGGMKEFATARGARMALGDTAWDVGSGGVTGVLHGHTGTATGVLFGVSTVMKIGDITGLTWGLNKRSTLSMTCIAGVMNLYLVNQVAGQSCVNMVKRGLEKCGSGGTYNEVHTWTEQZQDAPSKRLAAGVANGWGCGRSARTLENNMVKQSNELNHLNEMDKMTVTVGDSVSGLAGGKKMRPQMKHVSXWKGKMGAGQITDTPDPTPEPCDNQKRWANVSDYEGDGTGFTWNLKKNDSYTKDCHRLMAAKSDAAVAMHAWSEKENTHAKLEASIFCYVTPPSHTLVSDNHLSESMIRPQKQSDKNRYQPTQDZAGVHNLGDNQVTVYVTVGSDVHNGKQVNTLQVQKTEGAPCGSPGSDRGRNENLTVYPTKSPNEAPAGPTGSPKALAAAGVAGAKLSLWYKKGSSGGMKEFATARGARMALGDTAWDVGSGGVTGVLHGHTGTATGVLFGVSTVMKIGDITGLTWGLNKRSTLSMTCIAGVMNLYLVNQVAGQSCVNMVKRGLEKCGSGGTYNEVHTWTEQZQDAPSKRLAAGVANGWGCGRSARTLENNMVKQSNELNHLNEMDKMTVTVGDSVSGLAGGKKMRPQMKHVSXW |







|        |        |                                    |                               |             |     |                                                                                                                                                                                                                                                                                                                                                                                                                                                                                                                                                                                                                                                                                                                                                                                                                                                                                                                                                                                                                                                                                                                                                                                                                                                                                                                                                                                                                                                                                                                                                                                                                                                                                                                                                                                                                                                                                                                                                                                                                                                                                                                                                                                                                                                                                                                                                                                                                                                                                                                                                                                                                                                                                                                                                                                                                                                                                                                                                                                                                                                                                                                                                                                                                                                                                                                                                                                                                  |
|--------|--------|------------------------------------|-------------------------------|-------------|-----|------------------------------------------------------------------------------------------------------------------------------------------------------------------------------------------------------------------------------------------------------------------------------------------------------------------------------------------------------------------------------------------------------------------------------------------------------------------------------------------------------------------------------------------------------------------------------------------------------------------------------------------------------------------------------------------------------------------------------------------------------------------------------------------------------------------------------------------------------------------------------------------------------------------------------------------------------------------------------------------------------------------------------------------------------------------------------------------------------------------------------------------------------------------------------------------------------------------------------------------------------------------------------------------------------------------------------------------------------------------------------------------------------------------------------------------------------------------------------------------------------------------------------------------------------------------------------------------------------------------------------------------------------------------------------------------------------------------------------------------------------------------------------------------------------------------------------------------------------------------------------------------------------------------------------------------------------------------------------------------------------------------------------------------------------------------------------------------------------------------------------------------------------------------------------------------------------------------------------------------------------------------------------------------------------------------------------------------------------------------------------------------------------------------------------------------------------------------------------------------------------------------------------------------------------------------------------------------------------------------------------------------------------------------------------------------------------------------------------------------------------------------------------------------------------------------------------------------------------------------------------------------------------------------------------------------------------------------------------------------------------------------------------------------------------------------------------------------------------------------------------------------------------------------------------------------------------------------------------------------------------------------------------------------------------------------------------------------------------------------------------------------------------------------|
| DENVax |        |                                    |                               |             |     | <p>MNNQBKKAKNTFNNMLKRRNRNVTSQQLTKRPSGLMLQGRGP.LKLFMAALVFLRFTPTTPTAGLKRWGTIKKSAINVLRGRKEDGRMLNRRRRSAGIMLJPTVMAHLLTRNGEPHIMVSRQBXGLKFKTTFDGVNMCTLMAMD.LGELCEDTITYKC</p> <p>PLRKQNEIDEDWCNISTWVYTGICTMGEHRRKRSVALVPHVGGGLGLETRETETWMSSEGAWKHVQREITVILHHPGFTNMAALATYGTTFEQALFILLTAVTPSMTRCICQMSMRDHYEGVSGSVSDVHLEHSGCTVIMAKNPTLDFELKLTAKCP</p> <p>ATLRLCYEAKLTNTTTEKCP.TQSGPSLAEQDQVCHVSHMWONGNGGLGFGGGVCTAFMPCCKNMKGAVKQVPPNLTFTVTPHSGEHVANGDTQAGHGETKTPQGSSTAEALTGYCTVMECPSTQDPMENKLLDMHAKNANLVHRQWFLDPLP</p> <p>WLPDAGTQSGSNWIKETLVTFNKNHAKQDVVVLGSGEGAMHITALTGATEIQHSSGNLLFTGHLKCLRLRMKDLQLKGMSYSACTGKFKVKKEAETHQCTVTRVQVQEGDQSGCPKCFEIMDLKRRH.LGNLTVPNPTKEDSPVNEIAPFPFGDSYHIVGEPGL</p> <p>KLNVFKYKGGSSQMFETTRMGAKRMALGDTAWDFSGSLGDDVTSIGKALHQFGYGAAPGSVSWTMKILGVITWIGMNSRSTLSVTLVGVITVLGVMMQADQSGCVSWNNKELCCSGGFTNDHNTWTEQYKQFQSPESKLASAQKHAHEEGCGRSV</p> <p>TRLEMLMKWQPTPLNMLSENEVLTMTDQKGMAGKSLPQPTLEYSWYTGAAJMLSTEDHNGZFLTDGPTACCPNTNNAWHLSEYDYSQVFTTNWHLKEXQDVDCSSLSMSAANDNAHADQHWIESALNDTKHEKASFEVKNCHW</p> <p>PKSHLTWSNGVLESEMI.PKNLAGVPSQHNVRPGVHTQTGPWH.LKLEMDFOCDGTVTVTEDCGNRGPSLRTTAGSKLITEWCSCSCTPLPLRREGDGCWVGMERPLKKEENLNSVLSYTAGHQGVQDNFSLGVLMALFLEMLRTNTRTGHAILLVAVS</p> <p>FVTLITGNMFSRDLGRVMMVATMTDDIGMGVYTLALLAFAKVRPTFAAGLLRLKLSKELMMTTGIVLSQZTIFETLELTDALAGMMVLMVMRNMEXQLAVTMMALCVPAVILQNAVQVSTLAVVSPVLLTSSQOKTQWIP.LTKIGLNP.TAFLT</p> <p>TLSDTSKRWKSWP.NEAMAGVYALASLLKNDNPMTGFLVAGGLTVCYW.TGSDADLEERAQDWWEDQAEQSGSSPLSTISDGSMSHNEEELCTLTILRTGLLSVGLSPVSPITAAWYLVWVWKQABGLW.DWDPFPFPMG.ALEEDGAVRKQKIGLY</p> <p>SGSGADQVYEGETHVMMVHTGALMHRGKRIEPPVMDVWGLDVSVEGGWVLEGEWKEEGEEDQAL.EPFGNPPAAVOTPLSLFTTACGTIGASLQSDPSCTSGSPHKKKGLVGEVNGO.VTSSGAVNSHAJTEKEDNEPDEQDFKRBRLTMDL.HPGAGAT</p> <p>KRYLPAIVREAKRG.LRTLAPTRVAAEMEARLPLRQYTPAIRAETHGREIVDLMCHATTMBLLSPVVPNNLIMDEAHTDPASAARGVSTRVEMGEAGFMATPPGSRDPFQSNAPIDDEREPEBSWSEHWEVTDPRGKTVAVFVPSKAGNDI</p> <p>JAELCRNGKVKVLSKRTDSEYKVKTRNDWDVFTVTDISENANFKAERVDKPRCKMKPVLT.DGEVVLAGMPVTHSSAQRGRGKGNPKNENQDYMGEPLINDEDCAHWWEAMLLDNINTPLEGIPSMFPEREKVDAIDGERPLRGEAKTPYDOLMR</p> <p>RSQD.PVWLAVYVAGVAGVADNRVCFQGVNNKQLENVDEIKTEGERKLLPWNLDARYOPLALKEKFEFAKGSKLTMLTJENGRPTMTQKQALDNLAVJITADAGGAVNALSEL.PETLITLLTLATYTGSGFLRNGSGKMTLQMCCH</p> <p>TASILLWYAQIOPHHVAAISILEFFLVLLIPEPEKQTPQDNGLTYVAALTVVAATMANEMGFLKTXDKDLGSGIATQQFESNILDIDLRPASAWLYAVATTFVPM.LRHSIENSNNVSLTAANQATVLMGLGKSWPLKMDIOPV.LLAGCYQZQNPTLTAALF</p> <p>LLVAVYAIQGLQKATREAQKRAAGIMKNPVDGTVLDPPDPKFEKQLGVMLLVLYCQVLMKRTWALCFALTATGPSTLWEGNPRGFWNITLAVSMANFRGJLAGALFSIMKNTNTRRGTGNGIGLETGKWSKRNALGKSEFQYKXSG</p> <p>IQEDORTLAREGKGETDHHAVSGASLNPVFNENAVYFEGVLDGCCRGWSYTCGLNVRKVLTYGSGPHEPPEHSTGVNWLVLGGVDFVPPKCCD.LTCIGESNPPTVEAGATLVN.LNVEWLNWNTQCKVCLNPPMPSVHERMEAL</p> <p>QKRYSGALVRNPLRSNSTHEHMMVSNASGNVSVNMSRMLNRTMYRK.KATYEPDVLGSGTRNIGISEPNLD.HIGKRIEKQJQHETSWHYDQDHPKYTWAWHYSYETKQTSASSANWNGVWV.LTKP.WDVP.MV.TQMAMITDTPFGQORVFEKVDTR</p> <p>TOEPKEGKTKL.MKITAEWLWELCKKTPRMCTREETRVKYSNAALGAFTDENKWSAREAVEDSRFVELVDKERNLHLEGKCTCVNMMGKREKILGEFGAAK.GSAWYMW.LGARLFEALGFLNEDNHWFSRENLSGVEGEGHLYLRDVSKEG</p> <p>GAWYADDTADWDTRITLEDLKNEMVTHNMEGKHLLAJAFKLTQNKVYRVQRP.PRGTVMDHSRRDQSGQZVGTGLNTFTNMEALJRMQEGEGVYQKLTITTEIAJONWLARQGERLSMAAGSDGVVPLDQFASALDMLMGKLRQDQ</p> <p>QWFSRQWQWVTVQTFQZSHFHELJMKDGRVLYPCNNDQLGRARISQAGVCLRETKLCSHQZQWVSLMPTHRSQDLAAACASVPSHWVPTSTRTVWSHAKHEWMTTEMLTNWNVWQBPWMEDETPVESHKEPFLGREGDQWCSGL</p> <p>GLTSRATWAKQAQINQVRSIGNEEYDYMPMSMRFRREEEAGVLW</p> |
| TVQV   | DENV-1 | Nauru Island Western Pacific 45AZS | NP_72460.2                    | N/A         | Yes | <p>MIRCVGNGNDFVEGLSGATVVDVVLHGGCVYTMAKNPTLDELKTEATQLATRLK.CIEGKNTITTDSSRCPTQGEALTVEEQDTNFCRRTPYDRGWGNGCG.LFGKGLSTCAKFCVTKLEGKIVYENLKYSVIVTVMHQDQHVNETTEHGTATTTPQAP</p> <p>TSEQLTGYGALT.DCSPHTGLDFNEMVLLTMKKXSWLVYH.QWFLDPLPWTSAGTSASTQBNWRQD.LLVTKTAHAKQEVVVLGSGEGAMHITALTGATEIQSGTSIFAGHLKCLRMKDLKLGMSYAMCTLTVLKKVESETQHTLVQVYKTEGTDAPCKIP</p> <p>PHSSQDQGVYQWQRLTANPVYTKKEEPMNEADPPGDEIVYGAERALKSWKXSSGKMEATARGARRMAL.GDTAWDFSGVGGVYVLSLGR.MYHQIFGYSATLAFSGVSWMKGIGVLLVWGLNKNMTSMSCSAGIHTLVGVVQVHMLTSDRGEPR</p> <p>PHMVSQBERKSLFKTSAGVMNCTLAMLD.GELCEDTMYTKVCRITTEP.DDVCNCAETWTVYTGCTQSGTGEHRRKRSVALAPHVSLGLETRTETVMSSEGAWKHQVQVETVLAHPHFATVLAHAHQSTQKQGIIFLLMLVTPSMA</p>                                                                                                                                                                                                                                                                                                                                                                                                                                                                                                                                                                                                                                                                                                                                                                                                                                                                                                                                                                                                                                                                                                                                                                                                                                                                                                                                                                                                                                                                                                                                                                                                                                                                                                                                                                                                                                                                                                                                                                                                                                                                                                                                                                                                                                                                                                                                                                                                                                                                                                                                                                                                                                                                                                                                      |
|        | DENV-3 | H87                                | VIPR_ALG4_323525_499_1977.1   | Brazil      | No  | <p>MIRCVGNGNDFVEGLSGATVVDVVLHGGCVYTMAKNPTLDELKTEATQLATRLK.CIEGKNTITTDSSRCPTQGEALTVEEQDQNVYCKHYVDRGWGNGCG.LFGKGLSTCAKFCVTKLEGKIVYENLKYSVIVTVMHQDQHVNETQVYTABTSQAST</p> <p>AEALPEYGTGLECSPRTGLDFNEMVLLTMKNKAWMMHRQWFFDLPWPWTSGATTEPTNWRKELLVTKNAHAKQEVVVLGSGEGAMHITALTGATEIQSGTSIFAGHLKCLRMKDLKLGMSYAMCTLTVLKKVESETQHTLVQVYKTEGTDAPCKIP</p> <p>STEDGQZGQAHNRGTANPVYTKKEEPMNEADPPGDEIVYGAERALKSWKXSSGKMEATARGARRMAL.GDTAWDFSGVGGVYVLSLGR.MYHQIFGYSATLAFSGVSWMKGIGVLLVWGLNKNMTSMSCSAGIHTLVGVVQVHMLTSDRGEPR</p> <p>MYGFSRQWQWVTVQTFQZSHFHELJMKDGRVLYPCNNDQLGRARISQAGVCLRETKLCSHQZQWVSLMPTHRSQDLAAACASVPSHWVPTSTRTVWSHAKHEWMTTEMLTNWNVWQBPWMEDETPVESHKEPFLGREGDQWCSGL</p>                                                                                                                                                                                                                                                                                                                                                                                                                                                                                                                                                                                                                                                                                                                                                                                                                                                                                                                                                                                                                                                                                                                                                                                                                                                                                                                                                                                                                                                                                                                                                                                                                                                                                                                                                                                                                                                                                                                                                                                                                                                                                                                                                                                                                                                                                                                                                                                                                                                                                                                                                                                                                                                                                                                                              |
|        | DENV-4 | H241                               | VIPR_ALG4_61652905_931_2415.1 | Philippines | Yes | <p>MIRCVGNGNDFVEGSGGAWDVLVHGGCVYTMAGKQKPLTDFELKTTAK.EVALLRTYCEASSNITTATRCPTQSGEPLKEEQDQDQYCRDQVDRGWGNGCG.LFGKGLSTCAKFCVTKLEGKIVYENLKYSVIVTVMHQDQHVNETQVYTABTSQAST</p> <p>SPSVLVL.PDYGLTLDCEPSGDFNEMLMKMKXSWLVYH.QWFLDPLPWAGADTYEDWNNKERNMTRVPHAKRQVTVV.GSGEGAMHITALTGATEIQSGTSIFAGHLKCLRMKDLKLGMSYAMCTLTVLKKVESETQHTLVQVYKTEGTDAPCKIP</p> <p>JAGAPCVPIERBDVNEK.EKVGRISSTPFAEYTNVSNVLEPPFGDSYVGVGDSAL.THWFKSGSGKMLESTRMGAKRMAL.GDTAWDFSGVGGVYVLSLGR.MYHQIFGYSATLAFSGVSWMKGIGVLLVWGLNKNMTSMSCSAGIHTLVGVVQVHMLTSDRGEPR</p> <p>STRDGEPMVIAHGERGRPLPKTTTEGNKCTLIAMDLEGMEDTVYECPLNTTEPDEIDCWNLTSAWVMYGTCTQSGERRRKRKSVLTPHSGMGLTETRAEVMSSSEGAWKHQVQVETVLAHPHFATVLAHAHQSTQKQGIIFLLMLVTPSMA</p>                                                                                                                                                                                                                                                                                                                                                                                                                                                                                                                                                                                                                                                                                                                                                                                                                                                                                                                                                                                                                                                                                                                                                                                                                                                                                                                                                                                                                                                                                                                                                                                                                                                                                                                                                                                                                                                                                                                                                                                                                                                                                                                                                                                                                                                                                                                                                                                                                                                                                                                                                                                                                                                                                                                           |
|        | DENV-2 | ngc-2007                           | QBK46951.1                    | Thailand    | Yes | <p>PHLTRNGEPHIMVSRQBXGLKFKTTFDGVNMCTLMAMD.LGELCEDTITYKC.PFLKQNEIDEDWCNISTWVYTGICTTTEHRRKRSVALVPHVGGGLGLETRETETWMSSEGAWKHVQREITVILHHPGFTNMAALATYGTTFEQALFILLTAVTPSM</p> <p>TRCICQMSMRDHYEGVSGSVSDVHLEHSGCTVIMAKNPTLDFELKLTAKQPLATLRYKCEAKLTNTTDSRCPTQSGEPLNEEQDKRVCVCHSMVDRGWGNGCG.LFGKGLSTCAKFCVTKLEGKIVYENLKYSVIVTVMHQDQHVNETTEHGTATTTPQAP</p> <p>STAEALTGYCTVMECPSTQDPMENKLLDMHAKNANLVHRQWFLDPLP.WPAGADTYEDWNNKERNMTRVPHAKRQVTVV.GSGEGAMHITALTGATEIQSGTSIFAGHLKCLRMKDLKLGMSYAMCTLTVLKKVESETQHTLVQVYKTEGTDAPCKIP</p> <p>COUPTEMDLKRNLGR.LTVNPTVTEQSPVNEADPPGDEIVYGAERALKSWKXSSGKMEATARGARRMAL.GDTAWDFSGVGGVYVLSLGR.MYHQIFGYSATLAFSGVSWMKGIGVLLVWGLNKNMTSMSCSAGIHTLVGVVQVHMLTSDRGEPR</p>                                                                                                                                                                                                                                                                                                                                                                                                                                                                                                                                                                                                                                                                                                                                                                                                                                                                                                                                                                                                                                                                                                                                                                                                                                                                                                                                                                                                                                                                                                                                                                                                                                                                                                                                                                                                                                                                                                                                                                                                                                                                                                                                                                                                                                                                                                                                                                                                                                                                                                                                                                                                                                                                                                                         |



## CD4 DENV-1 Epitopes

| Epitope_ID | AA_Sequence      | Protein_Name | Start | End  | Allele                    | Step | Serotype       | Method/Technique | Assay Group  | Qualitative Measure | DENV-1 constructs of vaccines (100% identity=1, green; else 0, red) |      |      |           |        |       |
|------------|------------------|--------------|-------|------|---------------------------|------|----------------|------------------|--------------|---------------------|---------------------------------------------------------------------|------|------|-----------|--------|-------|
|            |                  |              |       |      |                           |      |                |                  |              |                     | T003                                                                | T0EN | DPIV | Dengvaxia | DENVax | TV/DV |
| 195246     | EISNMLNRRKRT     | C            | 87    | 101  | HLA-DRB1*13:01            | 0%   | Dengue virus 1 | ELISPOT          | IFNg release | Positive            | 0                                                                   | 0    | 0    | 0         | 0      | 0     |
| 195560     | KEVSNNMLNRRKRT   | C            | 86    | 100  | HLA-DRB1*13:01            | 0%   | Dengue virus 1 | ELISPOT          | IFNg release | Positive            | 0                                                                   | 0    | 0    | 0         | 0      | 0     |
| 195884     | RGFKFENSLMISIN   | C            | 82    | 96   | HLA-DRB1*04:01            | 0%   | Dengue virus 1 | ELISPOT          | IFNg release | Positive            | 0                                                                   | 0    | 0    | 0         | 0      | 0     |
| 196188     | VSVLFMLFLTAFLAH  | C            | 102   | 116  | HLA-DRB1*01:01            | 0%   | Dengue virus 1 | ELISPOT          | IFNg release | Positive            | 0                                                                   | 0    | 0    | 0         | 0      | 0     |
| 539048     | AFMAFLRFLAIPPTA  | C            | 27    | 41   | HLA-DRB1*15:02            | 0%   | Dengue virus 1 | ELISPOT          | IFNg release | Positive            | 0                                                                   | 0    | 0    | 0         | 0      | 0     |
| 539681     | MLNRRKRRSVTILM   | C            | 91    | 105  | HLA-DRB1*13:01            | 0%   | Dengue virus 1 | ELISPOT          | IFNg release | Positive            | 0                                                                   | 0    | 0    | 0         | 0      | 0     |
| 539816     | QPSFMMLKRRNRVS   | C            | 10    | 24   | HLA-DRB1*08:03            | 0%   | Dengue virus 1 | ELISPOT          | IFNg release | Positive            | 0                                                                   | 0    | 0    | 0         | 0      | 0     |
| 195359     | IGLFTSVGLIHLQVF  | E            | 706   | 720  | HLA-DRB1*11:01            | 0%   | Dengue virus 1 | ELISPOT          | IFNg release | Positive            | 0                                                                   | 0    | 0    | 0         | 0      | 0     |
| 195404     | IGSLFTSVGLIHLQVF | E            | 705   | 719  | HLA-DRB1*07:01            | 0%   | Dengue virus 1 | ELISPOT          | IFNg release | Positive            | 0                                                                   | 0    | 0    | 0         | 0      | 0     |
| 539840     | REDLVTKFTAHAKK   | E            | 513   | 527  | HLA-DRB1*04:03            | 0%   | Dengue virus 1 | ELISPOT          | IFNg release | Positive            | 0                                                                   | 0    | 0    | 0         | 0      | 0     |
| 539854     | RKDLVTKFTAHAKK   | E            | 513   | 527  | HLA-DRB1*04:03            | 0%   | Dengue virus 1 | ELISPOT          | IFNg release | Positive            | 0                                                                   | 0    | 0    | 0         | 0      | 0     |
| 867045     | HAKQEVAVVLSQEG   | E            | 244   | 258  | HLA-DQA1*03:01/DOB1*03:02 | 0%   | Dengue virus 1 | ELISPOT          | IFNg release | Positive            | 0                                                                   | 0    | 0    | 0         | 0      | 0     |
| 869085     | SVYVAGKQKALKLS   | E            | 376   | 390  | HLA-DRB5*01:01            | 0%   | Dengue virus 1 | ELISPOT          | IFNg release | Positive            | 0                                                                   | 0    | 0    | 0         | 0      | 0     |
| 869690     | WLIAHQWFLDLPLPW  | E            | 206   | 220  | HLA-DQA1*01:01/DOB1*05:01 | 0%   | Dengue virus 1 | ELISPOT          | IFNg release | Positive            | 0                                                                   | 0    | 0    | 0         | 0      | 0     |
| 195684     | LNHLLENDIKFTVV   | NS1          | 850   | 864  | HLA-DRB1*03:01            | 0%   | Dengue virus 1 | ELISPOT          | IFNg release | Positive            | 0                                                                   | 0    | 0    | 0         | 0      | 0     |
| 195690     | LNVLLENDIMKFTVV  | NS1          | 850   | 864  | HLA-DRB1*03:01            | 0%   | Dengue virus 1 | ELISPOT          | IFNg release | Positive            | 0                                                                   | 0    | 0    | 0         | 0      | 0     |
| 591686     | KFTVVVGDVSGILAQ  | NS1          | 860   | 874  | HLA-DRB1*03:01            | 0%   | Dengue virus 1 | ELISPOT          | IFNg release | Positive            | 1                                                                   | 1    | 1    | 1         | 0      | 0     |
| 868492     | QISNELNVLENDIM   | NS1          | 845   | 859  | HLA-DPB1*01:01            | 0%   | Dengue virus 1 | ELISPOT          | IFNg release | Positive            | 0                                                                   | 0    | 0    | 0         | 0      | 0     |
| 868630     | QYKQADSPVKKLSAA  | NS1          | 806   | 820  | HLA-DRB3*02:02            | 0%   | Dengue virus 1 | ELISPOT          | IFNg release | Positive            | 0                                                                   | 0    | 0    | 0         | 0      | 0     |
| 195196     | AWKTMAMALSIVSLF  | NS2a         | 1291  | 1305 | HLA-DRB1*08:02            | 0%   | Dengue virus 1 | ELISPOT          | IFNg release | Positive            | 0                                                                   | 0    | 0    | 0         | 0      | 0     |
| 195285     | FAVGLFRRTLSREI   | NS2a         | 1214  | 1228 | HLA-DRB1*11:01            | 0%   | Dengue virus 1 | ELISPOT          | IFNg release | Positive            | 0                                                                   | 0    | 0    | 0         | 0      | 0     |
| 195323     | FOSHQWATLLSLTF   | NS2a         | 1267  | 1281 | HLA-DPB1*04:02            | 0%   | Dengue virus 1 | ELISPOT          | IFNg release | Positive            | 1                                                                   | 1    | 1    | 0         | 0      | 0     |
| 195389     | GLLFRKTSREVLIL   | NS2a         | 1217  | 1231 | HLA-DRB1*11:01            | 0%   | Dengue virus 1 | ELISPOT          | IFNg release | Positive            | 0                                                                   | 0    | 0    | 0         | 0      | 0     |
| 195390     | GLLFRKTSREVLIL   | NS2a         | 1217  | 1231 | HLA-DRB1*07:01            | 0%   | Dengue virus 1 | ELISPOT          | IFNg release | Positive            | 0                                                                   | 0    | 0    | 0         | 0      | 0     |
| 195392     | GLLFRKTSREVLIL   | NS2a         | 1217  | 1231 | HLA-DRB1*10:01            | 0%   | Dengue virus 1 | ELISPOT          | IFNg release | Positive            | 0                                                                   | 0    | 0    | 0         | 0      | 0     |
| 195422     | GLTAVLLIMQGLT    | NS2a         | 1162  | 1176 | HLA-DRB1*01:01            | 0%   | Dengue virus 1 | ELISPOT          | IFNg release | Positive            | 0                                                                   | 0    | 0    | 0         | 0      | 0     |
| 195423     | GLTAVLLIMQGLT    | NS2a         | 1162  | 1176 | HLA-DRB1*15:01            | 0%   | Dengue virus 1 | ELISPOT          | IFNg release | Positive            | 0                                                                   | 0    | 0    | 0         | 0      | 0     |
| 195613     | LAFLVLLIMQGLTWN  | NS2a         | 1164  | 1178 | HLA-DRB1*15:06            | 0%   | Dengue virus 1 | ELISPOT          | IFNg release | Positive            | 0                                                                   | 0    | 0    | 0         | 0      | 0     |
| 195614     | LAFLVLLIMQGLTWN  | NS2a         | 1214  | 1228 | HLA-DRB1*11:01            | 0%   | Dengue virus 1 | ELISPOT          | IFNg release | Positive            | 0                                                                   | 0    | 0    | 0         | 0      | 0     |
| 195670     | LLSTFTKFTSLHYA   | NS2a         | 1276  | 1290 | HLA-DRB1*07:01            | 0%   | Dengue virus 1 | ELISPOT          | IFNg release | Positive            | 0                                                                   | 0    | 0    | 1         | 0      | 0     |
| 195713     | LSLFTKFTSLHYA    | NS2a         | 1277  | 1291 | HLA-DRB1*03:01            | 0%   | Dengue virus 1 | ELISPOT          | IFNg release | Positive            | 0                                                                   | 0    | 0    | 0         | 0      | 0     |
| 195756     | MLGLFRRLTSREVL   | NS2a         | 1216  | 1230 | HLA-DRB1*11:01            | 0%   | Dengue virus 1 | ELISPOT          | IFNg release | Positive            | 0                                                                   | 0    | 0    | 0         | 0      | 0     |
| 195881     | REVLLTVGLSLVAC   | NS2a         | 1226  | 1240 | HLA-DRB1*07:01            | 0%   | Dengue virus 1 | ELISPOT          | IFNg release | Positive            | 0                                                                   | 0    | 0    | 0         | 0      | 0     |
| 195959     | SLIEVMSRWRSRK    | NS2a         | 1143  | 1157 | HLA-DRB1*11:04            | 0%   | Dengue virus 1 | ELISPOT          | IFNg release | Positive            | 0                                                                   | 0    | 0    | 0         | 0      | 0     |
| 539624     | LSLFTKFTSLHYA    | NS2a         | 1277  | 1291 | HLA-DRB1*14:04            | 0%   | Dengue virus 1 | ELISPOT          | IFNg release | Positive            | 0                                                                   | 0    | 0    | 0         | 0      | 0     |
| 539625     | LSLFTKFTSLHYA    | NS2a         | 1277  | 1291 | HLA-DRB1*14:04            | 0%   | Dengue virus 1 | ELISPOT          | IFNg release | Positive            | 0                                                                   | 0    | 0    | 0         | 0      | 0     |
| 539626     | LSLFTKFTSLHYA    | NS2a         | 1275  | 1289 | HLA-DRB1*14:04            | 0%   | Dengue virus 1 | ELISPOT          | IFNg release | Positive            | 0                                                                   | 0    | 0    | 0         | 0      | 0     |
| 539651     | LVPFLLIMQGLTWS   | NS2a         | 1164  | 1178 | HLA-DRB1*15:06            | 0%   | Dengue virus 1 | ELISPOT          | IFNg release | Positive            | 0                                                                   | 0    | 0    | 0         | 0      | 0     |
| 539657     | MLSLVATLLSLTF    | NS2a         | 1297  | 1311 | HLA-DRB1*15:06            | 0%   | Dengue virus 1 | ELISPOT          | IFNg release | Positive            | 0                                                                   | 0    | 0    | 0         | 0      | 0     |
| 539679     | MLMTGTLAVFLLIM   | NS2a         | 1158  | 1172 | HLA-DRB1*15:06            | 0%   | Dengue virus 1 | ELISPOT          | IFNg release | Positive            | 0                                                                   | 0    | 0    | 0         | 0      | 0     |
| 539680     | MLMTGTLAVFLLIM   | NS2a         | 1158  | 1172 | HLA-DRB1*15:06            | 0%   | Dengue virus 1 | ELISPOT          | IFNg release | Positive            | 0                                                                   | 0    | 0    | 0         | 0      | 0     |
| 539912     | SLDYAWKTMAMALSI  | NS2a         | 1287  | 1301 | HLA-DRB1*09:01            | 0%   | Dengue virus 1 | ELISPOT          | IFNg release | Positive            | 0                                                                   | 0    | 0    | 0         | 0      | 0     |
| 539918     | SLTFTKFTSLHHAW   | NS2a         | 1278  | 1292 | HLA-DRB1*14:04            | 0%   | Dengue virus 1 | ELISPOT          | IFNg release | Positive            | 0                                                                   | 0    | 0    | 0         | 0      | 0     |
| 539974     | TGTLVFLLLTIGQL   | NS2a         | 1161  | 1175 | HLA-DRB1*15:06            | 0%   | Dengue virus 1 | ELISPOT          | IFNg release | Positive            | 0                                                                   | 0    | 0    | 0         | 0      | 0     |
| 540006     | TTLTSLTFTSLSL    | NS2a         | 1274  | 1288 | HLA-DRB1*12:02            | 0%   | Dengue virus 1 | ELISPOT          | IFNg release | Positive            | 0                                                                   | 0    | 0    | 0         | 0      | 0     |
| 591779     | TLAVFLLLIMQGLTW  | NS2a         | 36    | 50   | HLA-DRB1*11:01            | 0%   | Dengue virus 1 | ELISPOT          | IFNg release | Positive            | 1                                                                   | 1    | 1    | 1         | 0      | 0     |
| 739424     | LAFLVLLIMQGLTWN  | NS2a         | 1164  | 1178 | HLA-DRB1*11:04            | 0%   | Dengue virus 1 | ELISPOT          | IFNg release | Positive            | 0                                                                   | 0    | 0    | 0         | 0      | 0     |
| 739578     | LSLFTKFTSLHHAA   | NS2a         | 1277  | 1291 | HLA-DRB1*04:07            | 0%   | Dengue virus 1 | ELISPOT          | IFNg release | Positive            | 0                                                                   | 0    | 0    | 0         | 0      | 0     |
| 866118     | AMALSVSLFCLLS    | NS2a         | 1296  | 1310 | HLA-DPB1*04:01            | 0%   | Dengue virus 1 | ELISPOT          | IFNg release | Positive            | 0                                                                   | 0    | 0    | 0         | 0      | 0     |
| 866767     | FQSYQLWATLLSLTF  | NS2a         | 1267  | 1281 | HLA-DPB1*04:02            | 0%   | Dengue virus 1 | ELISPOT          | IFNg release | Positive            | 0                                                                   | 0    | 0    | 0         | 0      | 0     |
| 866873     | GILAFVLLIMQGLT   | NS2a         | 1162  | 1176 | HLA-DPB1*04:02            | 0%   | Dengue virus 1 | ELISPOT          | IFNg release | Positive            | 0                                                                   | 0    | 0    | 0         | 0      | 0     |
| 867997     | TSREILLTVGLSL    | NS2a         | 1223  | 1237 | HLA-DPB1*04:02            | 0%   | Dengue virus 1 | ELISPOT          | IFNg release | Positive            | 0                                                                   | 0    | 0    | 0         | 0      | 0     |
| 868513     | OPHQLWATLLSLTF   | NS2a         | 1268  | 1282 | HLA-DPB1*04:02            | 0%   | Dengue virus 1 | ELISPOT          | IFNg release | Positive            | 0                                                                   | 0    | 0    | 0         | 0      | 0     |
| 869103     | TDOPHQLWATLLSL   | NS2a         | 1267  | 1279 | HLA-DPB1*04:02            | 0%   | Dengue virus 1 | ELISPOT          | IFNg release | Positive            | 0                                                                   | 0    | 0    | 0         | 0      | 0     |
| 866200     | ATLFLVTFWQKKCOR  | NS2b         | 1461  | 1475 | HLA-DPB1*01:01            | 0%   | Dengue virus 1 | ELISPOT          | IFNg release | Positive            | 0                                                                   | 0    | 0    | 0         | 0      | 0     |
| 24915      | HTGKEVDLMCHATE   | NS3          | 251   | 265  | HLA-DPw2                  | 0%   | Dengue virus 1 | ICS              | IFNg release | Positive            | 0                                                                   | 0    | 0    | 0         | 0      | 0     |
| 539839     | REARRKRLTILAP    | NS3          | 1685  | 1699 | HLA-DRB1*14:04            | 0%   | Dengue virus 1 | ELISPOT          | IFNg release | Positive            | 0                                                                   | 0    | 0    | 0         | 0      | 0     |
| 539993     | TNCLRRKNGKRWQLS  | NS3          | 1848  | 1862 | HLA-DRB1*13:01            | 0%   | Dengue virus 1 | ELISPOT          | IFNg release | Positive            | 0                                                                   | 0    | 0    | 0         | 0      | 0     |
| 540071     | VREAIKKRLTILUA   | NS3          | 1684  | 1698 | HLA-DRB1*12:02            | 0%   | Dengue virus 1 | ELISPOT          | IFNg release | Positive            | 0                                                                   | 0    | 0    | 0         | 0      | 0     |
| 540075     | VREAIKKRLTILUA   | NS3          | 1684  | 1698 | HLA-DRB1*12:02            | 0%   | Dengue virus 1 | ELISPOT          | IFNg release | Positive            | 1                                                                   | 1    | 1    | 1         | 0      | 0     |
| 54391      | RKLTIMKLPGSGKIT  | NS3          | 1662  | 1676 | HLA class II              | 0%   | Dengue virus 1 | ICS              | IFNg release | Positive            | 0                                                                   | 0    | 0    | 0         | 0      | 0     |
| 738417     | AAAFMTATPPGSAE   | NS3          | 1785  | 1799 | HLA-DRB1*04:07            | 0%   | Dengue virus 1 | ELISPOT          | IFNg release | Positive            | 0                                                                   | 0    | 0    | 0         | 0      | 0     |
| 738418     | AAAFMTATPPGSAE   | NS3          | 1785  | 1799 | HLA-DRB1*04:07            | 0%   | Dengue virus 1 | ELISPOT          | IFNg release | Positive            | 0                                                                   | 0    | 0    | 0         | 0      | 0     |
| 195596     | KTSIGLLCVTASSAL  | NS4a         | 2174  | 2188 | HLA-DRB1*07:01            | 0%   | Dengue virus 1 | ELISPOT          | IFNg release | Positive            | 0                                                                   | 0    | 0    | 0         | 0      | 0     |
| 195680     | LMLLALVATLGGVY   | NS4a         | 2149  | 2163 | HLA-DRB1*01:01            | 0%   | Dengue virus 1 | ELISPOT          | IFNg release | Positive            | 0                                                                   | 0    | 0    | 0         | 0      | 0     |
| 196046     | TIETMLLAIAIAALT  | NS4a         | 2145  | 2159 | HLA-DRB1*01:01            | 0%   | Dengue virus 1 | ELISPOT          | IFNg release | Positive            | 0                                                                   | 0    | 0    | 0         | 0      | 0     |
| 739083     | GVLVFLSNGIGLGT   | NS4a         | 2161  | 2175 | HLA-DRB1*01:02            | 0%   | Dengue virus 1 | ELISPOT          | IFNg release | Positive            | 1                                                                   | 1    | 1    | 0         | 0      | 0     |
| 195308     | FLMLVAHYAIGRGLQ  | NS4b         | 2357  | 2371 | HLA-DRB1*07:01            | 0%   | Dengue virus 1 | ELISPOT          | IFNg release | Positive            | 0                                                                   | 0    | 0    | 0         | 0      | 0     |
| 868336     | PLTLTAALVLAHAHY  | NS4b         | 2349  | 2363 | HLA-DQA1*01:02/DOB1*06:02 | 0%   | Dengue virus 1 | ELISPOT          | IFNg release | Positive            | 0                                                                   | 0    | 0    | 0         | 0      | 0     |
| 195781     | NEDHVSRSNGSLSGV  | NS5          | 2985  | 2999 | HLA-DRB1*04:01            | 0%   | Dengue virus 1 | ELISPOT          | IFNg release | Positive            | 0                                                                   | 0    | 0    | 0         | 0      | 0     |
| 539509     | KSEFNIVRSKGIMEV  | NS5          | 2515  | 2529 | HLA-DRB1*15:02            | 0%   | Dengue virus 1 | ELISPOT          | IFNg release | Positive            | 0                                                                   | 0    | 0    | 0         | 0      | 0     |
| 539537     | LAKAIFLTYQNKVV   | NS5          | 3056  | 3070 | HLA-DRB1*14:04            | 0%   | Dengue virus 1 | ELISPOT          | IFNg release | Positive            | 0                                                                   | 0    | 0    | 0         | 0      | 0     |
| 195368     | GIIFILLMLVTPSMA  | PreM         | 266   | 280  | HLA-DRB1*01:01            | 100% | Dengue virus 1 | ELISPOT          | IFNg release | Positive            | 1                                                                   | 1    | 1    | 0         | 1      | 1     |
| 195562     | GIIFILLMLVTPSMA  | PreM         | 265   | 279  | HLA-DRB1*08:02            | 100% | Dengue virus 1 | ELISPOT          | IFNg release | Positive            | 1                                                                   | 1    | 1    | 0         | 1      | 1     |
| 195477     | IELLTCTVTPAVLR   | E            | 38    | 52   | HLA-DRB1*04:01            | 100% | Dengue virus 1 | ELISPOT          | IFNg release | Positive            | 1                                                                   | 1    | 1    | 1         | 1      | 1     |
| 540052     | VLSGQEGAMHTALGA  | E            | 247   | 262  | HLA class II              | 100% | Dengue virus 1 | ICS              | IFNg release | Positive            | 1                                                                   | 1    | 1    | 1         | 1      | 1     |
| 540104     | VVLGQEGAMHTALGT  | E            | 245   | 261  | HLA class II              | 100% | Dengue virus 1 | ICS              | IFNg release | Positive            | 1                                                                   | 1    | 1    | 1         | 1      | 1     |
| 591514     | SSIGKMFATARG     | E            | 396   | 408  | HLA-DQB                   | 100% | Dengue virus 1 | ELISPOT          | IFNg release | Positive            | 1                                                                   | 1    | 1    | 0         | 1      | 1     |
| 866284     | DDQRAWNIWEVDYG   | NS1          | 181   | 195  | HLA-DQA1*01:01/DOB1*05:01 | 100% | Dengue virus 1 | ELISPOT          | IFNg release | Positive            | 0                                                                   | 0    | 0    | 0         | 0      | 0     |
| 867041     | HADMGWIEVERKNT   | NS1          | 231   | 245  | HLA-DQA1*01:01/DOB1*05:01 | 100% | Dengue virus 1 | ELISPOT          | IFNg release | Positive            | 1                                                                   | 1    | 1    | 0         | 0      | 0     |
| 868574     | QRAWNIWEVDYRG    | NS1          | 183   | 197  | HLA-DQA1*01:01/DOB1*05:01 | 100% | Dengue virus 1 | ELISPOT          | IFNg release | Positive            | 1                                                                   | 1    | 1    | 0         | 0      | 0     |
| 195963     | RLMLVAHYAIGRGLQ  | NS2a         | 1325  | 1339 | HLA-DRB1*15:01            | 100% | Dengue virus 1 | ELISPOT          | IFNg release | Positive            | 0                                                                   | 0    | 0    | 0         | 0      | 0     |
| 539888     | RNSRKMMLTIGTLAFV | NS2a         | 1153  | 1167 | HLA-DRB1*04:03            | 100% |                |                  |              |                     |                                                                     |      |      |           |        |       |



|        |                      |      |      |      |                           |           |               |        |              |          |   |   |   |   |   |   |
|--------|----------------------|------|------|------|---------------------------|-----------|---------------|--------|--------------|----------|---|---|---|---|---|---|
| 539495 | KNGAKVLRFGKKEI       | C    | 52   | 66   | HLA-DRB1*12:02            | 81% <100% | Denguevirus 1 | ELSPOT | IFNg release | Positive | 1 | 1 | 1 | 0 | 0 | 0 |
| 539613 | LRLFAIPTAGILAR       | C    | 32   | 46   | HLA-DRB1*04:03            | 81% <100% | Denguevirus 1 | ELSPOT | IFNg release | Positive | 1 | 1 | 1 | 0 | 0 | 0 |
| 539711 | NGAKVLRFGKKEIS       | C    | 53   | 67   | HLA-DRB1*13:01            | 81% <100% | Denguevirus 1 | ELSPOT | IFNg release | Positive | 1 | 1 | 1 | 0 | 0 | 0 |
| 539785 | PSFNMLKRRNRVST       | C    | 11   | 25   | HLA-DRB1*10:01            | 81% <100% | Denguevirus 1 | ELSPOT | IFNg release | Positive | 1 | 1 | 1 | 0 | 0 | 0 |
| 738927 | LRFLAIPPTAGILA       | C    | 41   | 55   | HLA-DRB1*14:02            | 81% <100% | Denguevirus 1 | ELSPOT | IFNg release | Positive | 1 | 1 | 1 | 0 | 0 | 0 |
| 195887 | RKSKLLFKTSAGVNM      | PrEm | 111  | 125  | HLA-DRB1*07:01            | 81% <100% | Denguevirus 1 | ELSPOT | IFNg release | Positive | 1 | 1 | 1 | 0 | 1 | 1 |
| 539510 | KSLVLRFGKKEIMCT      | PrEm | 121  | 137  | HLA-DRB1*10:03            | 81% <100% | Denguevirus 1 | ELSPOT | IFNg release | Positive | 1 | 1 | 1 | 1 | 1 | 1 |
| 867912 | LHRPGFTVTLALAH       | PrEm | 242  | 256  | HLA-DPB1*02:01            | 81% <100% | Denguevirus 1 | ELSPOT | IFNg release | Positive | 1 | 1 | 1 | 0 | 0 | 0 |
| 195345 | AKFKCVTLLEGKIVQ      | E    | 117  | 131  | HLA-DRB1*11:01            | 81% <100% | Denguevirus 1 | ELSPOT | IFNg release | Positive | 1 | 1 | 1 | 1 | 1 | 1 |
| 195216 | DIELLKTETVNPAL       | E    | 37   | 51   | HLA-DRB1*04:01            | 81% <100% | Denguevirus 1 | ELSPOT | IFNg release | Positive | 1 | 1 | 1 | 1 | 1 | 1 |
| 195260 | ENLKYSVTVVTHDGT      | E    | 128  | 142  | HLA-DRB1*07:01            | 81% <100% | Denguevirus 1 | ELSPOT | IFNg release | Positive | 1 | 1 | 1 | 1 | 1 | 1 |
| 195362 | GGVTSVTVLQHQVF       | E    | 426  | 440  | HLA-DRB1*11:01            | 81% <100% | Denguevirus 1 | ELSPOT | IFNg release | Positive | 0 | 0 | 0 | 0 | 0 | 0 |
| 195547 | IVQYENKYSVTVT        | E    | 124  | 138  | HLA-DRB1*15:02            | 81% <100% | Denguevirus 1 | ELSPOT | IFNg release | Positive | 1 | 1 | 1 | 1 | 1 | 1 |
| 195623 | DIELLKTETVNPAP       | E    | 36   | 50   | HLA-DRB1*04:01            | 81% <100% | Denguevirus 1 | ELSPOT | IFNg release | Positive | 1 | 1 | 1 | 1 | 1 | 1 |
| 195646 | LITANPVTIDKQPV       | E    | 346  | 360  | HLA-DRB1*03:01            | 81% <100% | Denguevirus 1 | ELSPOT | IFNg release | Positive | 1 | 1 | 1 | 0 | 1 | 1 |
| 195814 | NRQDILVFTAKAHK       | E    | 227  | 241  | HLA-DRB1*04:01            | 81% <100% | Denguevirus 1 | ELSPOT | IFNg release | Positive | 1 | 1 | 1 | 1 | 1 | 1 |
| 195874 | QYENLKYSVTVVTH       | E    | 126  | 140  | HLA-DRB1*07:01            | 81% <100% | Denguevirus 1 | ELSPOT | IFNg release | Positive | 1 | 1 | 1 | 1 | 1 | 1 |
| 196053 | TDIELLKTETVNP        | E    | 35   | 49   | HLA-DRB1*04:01            | 81% <100% | Denguevirus 1 | ELSPOT | IFNg release | Positive | 1 | 1 | 1 | 1 | 1 | 1 |
| 539169 | DLTLVFTAKHAKQGE      | E    | 230  | 244  | HLA-DRB1*14:04            | 81% <100% | Denguevirus 1 | ELSPOT | IFNg release | Positive | 1 | 1 | 1 | 1 | 1 | 1 |
| 539378 | HAKQEVTVLQSGEGAMH    | E    | 239  | 253  | HLA class II              | 81% <100% | Denguevirus 1 | ICS    | IFNg release | Positive | 1 | 1 | 1 | 1 | 1 | 1 |
| 539593 | LLVTFTAKHAKQEV       | E    | 236  | 250  | HLA-DRB1*14:02            | 81% <100% | Denguevirus 1 | ELSPOT | IFNg release | Positive | 1 | 1 | 1 | 1 | 1 | 1 |
| 539800 | RLVLRFGKKEIMAKQ      | E    | 229  | 243  | HLA-DRB1*10:01            | 81% <100% | Denguevirus 1 | ELSPOT | IFNg release | Positive | 1 | 1 | 1 | 1 | 1 | 1 |
| 539869 | RQDLVTFTAKHAK        | E    | 228  | 242  | HLA-DRB1*08:03            | 81% <100% | Denguevirus 1 | ELSPOT | IFNg release | Positive | 1 | 1 | 1 | 1 | 1 | 1 |
| 741745 | MRCVYIGNRDFVEGLSGATW | E    | 281  | 300  | HLA class II              | 81% <100% | Denguevirus 1 | ELSPOT | IFNg release | Positive | 1 | 1 | 1 | 1 | 1 | 1 |
| 868013 | LWHQWFLDPLPLWT       | E    | 487  | 501  | HLA-DQA1*01:01/DQB1*05:01 | 81% <100% | Denguevirus 1 | ELSPOT | IFNg release | Positive | 1 | 1 | 1 | 1 | 1 | 1 |
| 869691 | VLWHQWFLDPLPLPW      | E    | 486  | 500  | HLA-DQA1*01:01/DQB1*05:01 | 81% <100% | Denguevirus 1 | ELSPOT | IFNg release | Positive | 1 | 1 | 1 | 1 | 1 | 1 |
| 132583 | QYKQFQADSPKRLSA      | NS1  | 31   | 45   | HLA-DRB1*03:01            | 81% <100% | Denguevirus 1 | ELSPOT | IFNg release | Positive | 1 | 1 | 1 | 0 | 0 | 0 |
| 195579 | KNETWKLARASHIEV      | NS1  | 206  | 220  | HLA-DRB1*07:01            | 81% <100% | Denguevirus 1 | ELSPOT | IFNg release | Positive | 1 | 1 | 1 | 0 | 0 | 0 |
| 195685 | LNHLLNDMMKFTVH       | NS1  | 75   | 89   | HLA-DRB1*03:01            | 81% <100% | Denguevirus 1 | ELSPOT | IFNg release | Positive | 1 | 1 | 1 | 0 | 0 | 0 |
| 195784 | NETWKLARASHIEV       | NS1  | 207  | 221  | HLA-DRB1*07:01            | 81% <100% | Denguevirus 1 | ELSPOT | IFNg release | Positive | 1 | 1 | 1 | 0 | 0 | 0 |
| 539401 | ISEKENTWKLARASFI     | NS1  | 202  | 218  | HLA class II              | 81% <100% | Denguevirus 1 | ICS    | IFNg release | Positive | 1 | 1 | 1 | 0 | 0 | 0 |
| 869135 | TEQYKQADSPKRLS       | NS1  | 65   | 79   | HLA-DRB5*01:01            | 81% <100% | Denguevirus 1 | ELSPOT | IFNg release | Positive | 1 | 1 | 1 | 0 | 0 | 0 |
| 195286 | FAVGLFRRLTSREV       | NS2a | 1214 | 1228 | HLA-DRB1*08:03            | 81% <100% | Denguevirus 1 | ELSPOT | IFNg release | Positive | 1 | 1 | 1 | 0 | 0 | 0 |
| 195391 | GLLFRRLTSREVL        | NS2a | 1217 | 1231 | HLA-DRB1*08:03            | 81% <100% | Denguevirus 1 | ELSPOT | IFNg release | Positive | 1 | 1 | 1 | 0 | 0 | 0 |
| 195665 | LLTIGLSLVASVEL       | NS2a | 1229 | 1243 | HLA-DRB1*07:01            | 81% <100% | Denguevirus 1 | ELSPOT | IFNg release | Positive | 0 | 0 | 0 | 0 | 0 | 0 |
| 195674 | LLTIGLSLVASVEL       | NS2a | 1230 | 1244 | HLA-DRB1*07:01            | 81% <100% | Denguevirus 1 | ELSPOT | IFNg release | Positive | 0 | 0 | 0 | 0 | 0 | 0 |
| 195708 | LSLDRB1*01:01        | NS2a | 1229 | 1243 | HLA-DRB1*01:01            | 81% <100% | Denguevirus 1 | ELSPOT | IFNg release | Positive | 1 | 1 | 1 | 0 | 0 | 0 |
| 539094 | ATFKMPMPFAVGLF       | NS2a | 1206 | 1220 | HLA-DRB1*01:02            | 81% <100% | Denguevirus 1 | ELSPOT | IFNg release | Positive | 0 | 0 | 0 | 0 | 0 | 0 |
| 539205 | IEVMRSRWSRKMLMT      | NS2a | 1147 | 1161 | HLA-DRB1*13:01            | 81% <100% | Denguevirus 1 | ELSPOT | IFNg release | Positive | 1 | 1 | 1 | 0 | 0 | 0 |
| 539398 | IEVMRSRWSRKMLMT      | NS2a | 1146 | 1160 | HLA-DRB1*13:01            | 81% <100% | Denguevirus 1 | ELSPOT | IFNg release | Positive | 1 | 1 | 1 | 0 | 0 | 0 |
| 540038 | VGLFRRLTSREVL        | NS2a | 1216 | 1230 | HLA-DRB1*08:03            | 81% <100% | Denguevirus 1 | ELSPOT | IFNg release | Positive | 1 | 1 | 1 | 0 | 0 | 0 |
| 540155 | YLALMATFKMPMPFA      | NS2a | 1201 | 1215 | HLA-DRB1*13:01            | 81% <100% | Denguevirus 1 | ELSPOT | IFNg release | Positive | 0 | 0 | 0 | 0 | 0 | 0 |
| 738553 | AVGLFRRLTSREV        | NS2a | 1215 | 1229 | HLA-DRB1*01:02            | 81% <100% | Denguevirus 1 | ELSPOT | IFNg release | Positive | 1 | 1 | 1 | 0 | 0 | 0 |
| 868098 | MGMGTLYALMATFK       | NS2a | 456  | 470  | HLA-DRB5*01:01            | 81% <100% | Denguevirus 1 | ELSPOT | IFNg release | Positive | 0 | 0 | 0 | 0 | 0 | 0 |
| 868100 | MGQLTWNDLRLCIM       | NS2a | 433  | 447  | HLA-DPB1*04:02            | 81% <100% | Denguevirus 1 | ELSPOT | IFNg release | Positive | 1 | 1 | 1 | 0 | 0 | 0 |
| 195191 | AVGISVLLSLKCN        | NS2b | 1355 | 1369 | HLA-DRB1*08:02            | 81% <100% | Denguevirus 1 | ELSPOT | IFNg release | Positive | 1 | 1 | 1 | 1 | 0 | 0 |
| 195228 | DTLTKLTKALLVAS       | NS2b | 1438 | 1452 | HLA-DRB1*08:02            | 81% <100% | Denguevirus 1 | ELSPOT | IFNg release | Positive | 0 | 0 | 0 | 0 | 0 | 0 |
| 195508 | ILVEVQDGMTRKID       | NS2b | 68   | 82   | HLA-DRB1*03:01            | 81% <100% | Denguevirus 1 | ELSPOT | IFNg release | Positive | 1 | 1 | 1 | 0 | 0 | 0 |
| 195510 | IMAVGISVLLSL         | NS2b | 1353 | 1367 | HLA-DRB1*07:01            | 81% <100% | Denguevirus 1 | ELSPOT | IFNg release | Positive | 1 | 1 | 1 | 1 | 0 | 0 |
| 195715 | LSLKNLNDVPLAGFL      | NS2b | 1363 | 1377 | HLA-DRB1*03:01            | 81% <100% | Denguevirus 1 | ELSPOT | IFNg release | Positive | 1 | 1 | 1 | 1 | 0 | 0 |
| 195724 | LTLLKATLILKSGV       | NS2b | 1440 | 1454 | HLA-DRB1*08:02            | 81% <100% | Denguevirus 1 | ELSPOT | IFNg release | Positive | 0 | 0 | 0 | 0 | 0 | 0 |
| 195878 | RODILTLLKATLLA       | NS2b | 1436 | 1450 | HLA-DRB1*12:02            | 81% <100% | Denguevirus 1 | ELSPOT | IFNg release | Positive | 1 | 1 | 1 | 0 | 0 | 0 |
| 195993 | SSLKNDDVPLAGFL       | NS2b | 1364 | 1378 | HLA-DRB1*03:01            | 81% <100% | Denguevirus 1 | ELSPOT | IFNg release | Positive | 1 | 1 | 1 | 1 | 0 | 0 |
| 196111 | VEVQDGMTRKID         | NS2b | 1421 | 1435 | HLA-DRB1*03:01            | 81% <100% | Denguevirus 1 | ELSPOT | IFNg release | Positive | 1 | 1 | 1 | 0 | 0 | 0 |
| 866201 | ATLEWVFWYQMKDDE      | NS2b | 1461 | 1475 | HLA-DPB1*01:01            | 81% <100% | Denguevirus 1 | ELSPOT | IFNg release | Positive | 1 | 1 | 1 | 0 | 0 | 0 |
| 867359 | IVSLLSLKNDDVP        | NS2b | 1358 | 1372 | HLA-DPB1*04:02            | 81% <100% | Denguevirus 1 | ELSPOT | IFNg release | Positive | 1 | 1 | 1 | 1 | 0 | 0 |
| 867544 | LAGPLIAGMGACIAC      | NS2b | 1373 | 1387 | HLA-DQA1*01:02/DQB1*06:02 | 81% <100% | Denguevirus 1 | ELSPOT | IFNg release | Positive | 1 | 1 | 1 | 1 | 0 | 0 |
| 167826 | TSGYVISAIAQKASGE     | NS3  | 157  | 173  | HLA class II              | 81% <100% | Denguevirus 1 | ELSPOT | IFNg release | Positive | 1 | 1 | 1 | 0 | 0 | 0 |
| 195143 | AIVREAKRLRLTL        | NS3  | 1682 | 1696 | HLA-DRB1*11:01            | 81% <100% | Denguevirus 1 | ELSPOT | IFNg release | Positive | 0 | 0 | 0 | 0 | 0 | 0 |
| 195163 | ANCLRRKNGKRVQLS      | NS3  | 1849 | 1863 | HLA-DRB1*13:01            | 81% <100% | Denguevirus 1 | ELSPOT | IFNg release | Positive | 0 | 0 | 0 | 0 | 0 | 0 |
| 195165 | ANFRADRVIRPRCL       | NS3  | 1891 | 1905 | HLA-DRB1*03:01            | 81% <100% | Denguevirus 1 | ELSPOT | IFNg release | Positive | 1 | 1 | 1 | 0 | 0 | 0 |
| 195201 | CHATTVMRLSPVVR       | NS3  | 1737 | 1751 | HLA-DRB1*01:01            | 81% <100% | Denguevirus 1 | ELSPOT | IFNg release | Positive | 1 | 1 | 1 | 0 | 0 | 0 |
| 195242 | EGKVLGVNGVVT         | NS3  | 1618 | 1632 | HLA-DRB1*15:01            | 81% <100% | Denguevirus 1 | ELSPOT | IFNg release | Positive | 1 | 1 | 1 | 0 | 0 | 0 |
| 195296 | HTHMWHVIRGAVLMY      | NS3  | 1521 | 1535 | HLA-DRB1*07:01            | 81% <100% | Denguevirus 1 | ELSPOT | IFNg release | Positive | 1 | 1 | 1 | 0 | 0 | 0 |
| 195337 | GYRLDGLGRSGV         | NS3  | 1496 | 1510 | HLA-DRB1*11:01            | 81% <100% | Denguevirus 1 | ELSPOT | IFNg release | Positive | 1 | 1 | 1 | 0 | 0 | 0 |
| 195349 | GNKVLGVNGVVT         | NS3  | 1499 | 1513 | HLA-DRB1*15:01            | 81% <100% | Denguevirus 1 | ELSPOT | IFNg release | Positive | 1 | 1 | 1 | 0 | 0 | 0 |
| 195549 | IVYLRQGLGRSGV        | NS3  | 1494 | 1511 | HLA-DRB1*15:01            | 81% <100% | Denguevirus 1 | ELSPOT | IFNg release | Positive | 1 | 1 | 1 | 0 | 0 | 0 |
| 195585 | RKRLTLAPTRVR         | NS3  | 1689 | 1703 | HLA-DRB1*10:01            | 81% <100% | Denguevirus 1 | ELSPOT | IFNg release | Positive | 0 | 0 | 0 | 0 | 0 | 0 |
| 195705 | RLTLAPTRVASEM        | NS3  | 1692 | 1706 | HLA-DRB1*08:02            | 81% <100% | Denguevirus 1 | ELSPOT | IFNg release | Positive | 0 | 0 | 0 | 0 | 0 | 0 |
| 195777 | NCLRKNGKRVQLSR       | NS3  | 1849 | 1863 | HLA-DRB1*11:01            | 81% <100% | Denguevirus 1 | ELSPOT | IFNg release | Positive | 0 | 0 | 0 | 0 | 0 | 0 |
| 195778 | NDIANCLRKNGKRV       | NS3  | 1845 | 1859 | HLA-DRB1*11:01            | 81% <100% | Denguevirus 1 | ELSPOT | IFNg release | Positive | 0 | 0 | 0 | 0 | 0 | 0 |
| 195896 | RKRLTLAPTRVRA        | NS3  | 1690 | 1704 | HLA-DRB1*01:01            | 81% <100% | Denguevirus 1 | ELSPOT | IFNg release | Positive | 0 | 0 | 0 | 0 | 0 | 0 |
| 195914 | RLTLAPTRVASEM        | NS3  | 1693 | 1707 | HLA-DRB1*10:01            | 81% <100% | Denguevirus 1 | ELSPOT | IFNg release | Positive | 0 | 0 | 0 | 0 | 0 | 0 |
| 196138 | VLDGGVYRILQGLL       | NS3  | 1492 | 1506 | HLA-DRB1*11:01            | 81% <100% | Denguevirus 1 | ELSPOT | IFNg release | Positive | 1 | 1 | 1 | 0 | 0 | 0 |
| 196197 | VTGVAVLVYQGRKLE      | NS3  | 1527 | 1541 | HLA-DRB1*15:01            | 81% <100% | Denguevirus 1 | ELSPOT | IFNg release | Positive | 1 | 1 | 1 | 0 | 0 | 0 |
| 30397  | KEGKRRKLPRWLD        | NS3  | 585  | 599  | HLA class II              | 81% <100% | Denguevirus 1 | ICS    | IFNg release | Positive | 1 | 1 | 1 | 0 | 0 | 0 |
| 45669  | NREGKVLGVNGVV        | NS3  | 141  | 155  | HLA-DRB1*15:01            | 81% <100% | Denguevirus 1 | ICS    | IFNg release | Positive | 1 | 1 | 1 | 0 | 0 | 0 |
| 49768  | PTRVASEMAEALGK       | NS3  | 224  | 238  | HLA-DRB1*15:01            | 81% <100% | Denguevirus 1 | ICS    | IFNg release | Positive | 1 | 1 | 1 | 0 | 0 | 0 |
| 539022 | AAAFITPATPGSSVE      | NS3  | 1785 | 1799 | HLA-DRB1*04:03            | 81% <100% | Denguevirus 1 | ELSPOT | IFNg release | Positive | 1 | 1 | 1 | 0 | 0 | 0 |
| 539072 | AAAFITPATPGSSVE      | NS3  | 1786 | 1800 | HLA-DRB1*10:01            | 81% <100% | Denguevirus 1 | ELSPOT | IFNg release | Positive | 1 | 1 | 1 | 0 | 0 | 0 |
| 539155 | DGVRILQGLGRS         | NS3  | 1495 | 1509 | HLA-DRB1*12:02            | 81% <100% | Denguevirus 1 | ELSPOT | IFNg release | Positive | 1 | 1 | 1 | 0 | 0 | 0 |
| 539171 | DLMCHATTMBRLSP       | NS3  | 1734 | 1748 | HLA-DRB1*13:01            | 81% <100% | Denguevirus 1 | ELSPOT | IFNg release | Positive | 1 | 1 | 1 | 0 |   |   |



|         |                         |       |      |      |                           |             |               |                     |              |              |   |   |   |   |   |   |
|---------|-------------------------|-------|------|------|---------------------------|-------------|---------------|---------------------|--------------|--------------|---|---|---|---|---|---|
| 868296  | PEHALLATSIFKLT          | N55   | 3051 | 3065 | HLA-DPB1*02:01            | 81% - <100% | Denguevirus 1 | ELISPOT             | IFNg release | Positive     | 1 | 1 | 1 | 0 | 0 | 0 |
| 868641  | RLEFEAFGLFMEDH          | N55   | 2974 | 2988 | HLA-DPB1*04:01            | 81% - <100% | Denguevirus 1 | ELISPOT             | IFNg release | Positive     | 1 | 1 | 1 | 0 | 0 | 0 |
| 195540  | ISSMLNIMNRRKRSV         | C     | 76   | 90   | HLA-DRB1*14:02            | 51%-80%     | Denguevirus 1 | ELISPOT             | IFNg release | Positive     | 0 | 0 | 0 | 0 | 0 | 0 |
| 195885  | RGFKKESSMLNIMN          | C     | 60   | 74   | HLA-DRB1*04:01            | 51%-80%     | Denguevirus 1 | ELISPOT             | IFNg release | Positive     | 0 | 0 | 0 | 0 | 0 | 0 |
| 539258  | FKKEISSMLNIMNRR         | C     | 62   | 76   | HLA-DRB1*10:01            | 51%-80%     | Denguevirus 1 | ELISPOT             | IFNg release | Positive     | 0 | 0 | 0 | 0 | 0 | 0 |
| 539459  | KEISSMLNIMNRRKR         | C     | 64   | 78   | HLA-DRB1*14:04            | 51%-80%     | Denguevirus 1 | ELISPOT             | IFNg release | Positive     | 0 | 0 | 0 | 0 | 0 | 0 |
| 539475  | KGEISSMLNIMNRRK         | C     | 63   | 77   | HLA-DRB1*14:04            | 51%-80%     | Denguevirus 1 | ELISPOT             | IFNg release | Positive     | 0 | 0 | 0 | 0 | 0 | 0 |
| 539617  | LRGFKKEISSMLNIM         | C     | 59   | 73   | HLA-DRB1*13:01            | 51%-80%     | Denguevirus 1 | ELISPOT             | IFNg release | Positive     | 0 | 0 | 0 | 0 | 0 | 0 |
| 540059  | VLRFKKEISSMLNIM         | C     | 68   | 82   | HLA-DRB1*04:07            | 51%-80%     | Denguevirus 1 | ELISPOT             | IFNg release | Positive     | 0 | 0 | 0 | 0 | 0 | 0 |
| 195831  | PGFTVIALFLAHAGI         | PreM  | 245  | 259  | HLA-DRB1*15:01            | 51%-80%     | Denguevirus 1 | ELISPOT             | IFNg release | Positive     | 1 | 1 | 1 | 0 | 1 | 1 |
| 196085  | TVIALFLAHAGITS          | PreM  | 248  | 262  | HLA-DRB1*07:01            | 51%-80%     | Denguevirus 1 | ELISPOT             | IFNg release | Positive     | 1 | 1 | 1 | 0 | 1 | 1 |
| 867083  | HPGFTVIALFLAHAI         | PreM  | 244  | 258  | HLA-DPB1*02:01            | 51%-80%     | Denguevirus 1 | ELISPOT             | IFNg release | Positive     | 1 | 1 | 1 | 0 | 1 | 1 |
| 539679  | GVSWTVMKIGILLIT         | E     | 445  | 459  | HLA-DRB1*15:02            | 51%-80%     | Denguevirus 1 | ELISPOT             | IFNg release | Positive     | 1 | 1 | 1 | 0 | 1 | 1 |
| 539670  | MKIGILLITWGLGN          | E     | 450  | 464  | HLA-DRB1*15:06            | 51%-80%     | Denguevirus 1 | ELISPOT             | IFNg release | Positive     | 1 | 1 | 1 | 0 | 1 | 1 |
| 867101  | HTALTGATEIQTSGT         | E     | 541  | 555  | HLA-DQA1*01:02/DQB1*06:02 | 51%-80%     | Denguevirus 1 | ELISPOT             | IFNg release | Positive     | 1 | 1 | 1 | 1 | 1 | 1 |
| 195162  | AMVLSIVSLFPLCLS         | N52a  | 1296 | 1310 | HLA-DRB1*15:01            | 51%-80%     | Denguevirus 1 | ELISPOT             | IFNg release | Positive     | 0 | 0 | 0 | 1 | 0 | 0 |
| 195595  | KTMAMVLSIVSLFPL         | N52a  | 1293 | 1307 | HLA-DRB1*03:01            | 51%-80%     | Denguevirus 1 | ELISPOT             | IFNg release | Positive     | 0 | 0 | 0 | 1 | 0 | 0 |
| 195745  | MAMVLSIVSLFPLCL         | N52a  | 1295 | 1309 | HLA-DRB1*07:01            | 51%-80%     | Denguevirus 1 | ELISPOT             | IFNg release | Positive     | 0 | 0 | 0 | 1 | 0 | 0 |
| 196216  | WKTAMAMVLSIVSLF         | N52a  | 1292 | 1306 | HLA-DRB1*08:02            | 51%-80%     | Denguevirus 1 | ELISPOT             | IFNg release | Positive     | 0 | 0 | 0 | 1 | 0 | 0 |
| 1392180 | GREVDLMCHATFTM          | N53   | 1730 | 1744 | HLA-DRB1*03:01            | 51%-80%     | Denguevirus 1 | biological activity | activation   | Positive     | 1 | 1 | 1 | 0 | 0 | 0 |
| 869696  | WNTGEEVQVIAVEFG         | N53   | 1564 | 1578 | HLA-DQA1*03:01/DQB1*03:02 | 51%-80%     | Denguevirus 1 | ELISPOT             | IFNg release | Positive     | 0 | 0 | 0 | 0 | 0 | 0 |
| 539383  | HLTLBAQNLNLNLM          | N54a  | 2110 | 2124 | HLA-DRB1*02:02            | 51%-80%     | Denguevirus 1 | ELISPOT             | IFNg release | Positive     | 0 | 0 | 0 | 0 | 0 | 0 |
| 195186  | ATNQVAIQNRRLI           | N55   | 3352 | 3366 | HLA-DRB1*03:01            | 51%-80%     | Denguevirus 1 | ELISPOT             | IFNg release | Positive     | 1 | 1 | 1 | 0 | 0 | 0 |
| 195385  | GLHLKGYLRDISKI          | N55   | 3003 | 3017 | HLA-DRB1*08:02            | 51%-80%     | Denguevirus 1 | ELISPOT             | IFNg release | Positive     | 1 | 1 | 1 | 0 | 0 | 0 |
| 195783  | NENYDVTMSMKRFK          | N55   | 3368 | 3382 | HLA-DRB1*11:01            | 51%-80%     | Denguevirus 1 | ELISPOT             | IFNg release | Positive     | 0 | 0 | 0 | 0 | 0 | 0 |
| 195824  | NKYDVTMSMKRFKNE         | N55   | 3370 | 3384 | HLA-DRB1*14:02            | 51%-80%     | Denguevirus 1 | ELISPOT             | IFNg release | Positive     | 0 | 0 | 0 | 0 | 0 | 0 |
| 539350  | GTAKRWFWERNLYK          | N55   | 2551 | 2565 | HLA-DRB1*09:01            | 51%-80%     | Denguevirus 1 | ELISPOT             | IFNg release | Positive     | 1 | 1 | 1 | 0 | 0 | 0 |
| 539691  | MTRSMLNIRNFTMAHR        | N55   | 17   | 31   | HLA-DRB1*14:06            | 51%-80%     | Denguevirus 1 | ELISPOT             | IFNg release | Positive     | 1 | 1 | 1 | 0 | 0 | 0 |
| 738814  | ENLYDVTMSMKRFKN         | N55   | 3369 | 3383 | HLA-DRB1*14:02            | 51%-80%     | Denguevirus 1 | ELISPOT             | IFNg release | Positive     | 0 | 0 | 0 | 0 | 0 | 0 |
| 740786  | LYDVTMSMKRFKNES         | N55   | 3371 | 3385 | HLA-DRB1*14:02            | 51%-80%     | Denguevirus 1 | ELISPOT             | IFNg release | Positive     | 0 | 0 | 0 | 0 | 0 | 0 |
| 866481  | EAVEDERFWDLVHRE         | N55   | 2916 | 2930 | HLA-DQA1*01:01/DQB1*05:01 | 51%-80%     | Denguevirus 1 | ELISPOT             | IFNg release | Positive     | 1 | 1 | 1 | 0 | 0 | 0 |
| 869091  | TAKLRWFWERNLVKP         | N55   | 2552 | 2566 | HLA-DQA1*01:01/DQB1*05:01 | 51%-80%     | Denguevirus 1 | ELISPOT             | IFNg release | Positive     | 1 | 1 | 1 | 0 | 0 | 0 |
| 1067569 | LARWGSFKKGAIKVV         | C     | 66   | 80   | HLA-DRB1*07:01            | >0% -50%    | Denguevirus 1 | ELISPOT             | IFNg release | Positive-Low | 1 | 1 | 1 | 0 | 0 | 0 |
| 195315  | FMMLKARRNRVSTVS         | C     | 13   | 27   | HLA-DRB1*08:02            | >0% -50%    | Denguevirus 1 | ELISPOT             | IFNg release | Positive     | 1 | 1 | 1 | 0 | 0 | 0 |
| 195498  | IKVLGRFKKEISSML         | C     | 78   | 92   | HLA-DRB1*04:01            | >0% -50%    | Denguevirus 1 | ELISPOT             | IFNg release | Positive     | 1 | 1 | 1 | 0 | 0 | 0 |
| 195535  | ISMLNIMNRRKRSV          | C     | 88   | 102  | HLA-DRB1*08:02            | >0% -50%    | Denguevirus 1 | ELISPOT             | IFNg release | Positive     | 1 | 1 | 1 | 0 | 0 | 0 |
| 195557  | KEISSMLNIMNRRKR         | C     | 86   | 100  | HLA-DRB1*13:01            | >0% -50%    | Denguevirus 1 | ELISPOT             | IFNg release | Positive     | 1 | 1 | 1 | 0 | 0 | 0 |
| 195805  | NMLNIMNRRKRSVTM         | C     | 90   | 104  | HLA-DRB1*11:01            | >0% -50%    | Denguevirus 1 | ELISPOT             | IFNg release | Positive     | 1 | 1 | 1 | 0 | 0 | 0 |
| 195883  | RGFKKEISSMLNIMN         | C     | 82   | 96   | HLA-DRB1*04:01            | >0% -50%    | Denguevirus 1 | ELISPOT             | IFNg release | Positive     | 1 | 1 | 1 | 0 | 0 | 0 |
| 196146  | VLRFKKEISSMLNIM         | C     | 80   | 94   | HLA-DRB1*04:01            | >0% -50%    | Denguevirus 1 | ELISPOT             | IFNg release | Positive     | 1 | 1 | 1 | 0 | 0 | 0 |
| 196195  | VTMLFMFLPTALFAH         | C     | 102  | 116  | HLA-DRB1*04:01            | >0% -50%    | Denguevirus 1 | ELISPOT             | IFNg release | Positive     | 0 | 0 | 0 | 0 | 0 | 0 |
| 39096   | LRGFKKEISSMLN           | C     | 81   | 95   | HLA-DPw4                  | >0% -50%    | Denguevirus 1 | ICS                 | TNF release  | Positive     | 1 | 1 | 1 | 0 | 0 | 0 |
| 539257  | FKKEISSMLNIMNRR         | C     | 84   | 98   | HLA-DRB1*04:03            | >0% -50%    | Denguevirus 1 | ELISPOT             | IFNg release | Positive     | 1 | 1 | 1 | 0 | 0 | 0 |
| 539278  | GAIKVLGRFKKEISS         | C     | 76   | 90   | HLA-DRB1*12:02            | >0% -50%    | Denguevirus 1 | ELISPOT             | IFNg release | Positive     | 1 | 1 | 1 | 0 | 0 | 0 |
| 539616  | LRGFKKEISSMLNIM         | C     | 81   | 95   | HLA-DRB1*10:01            | >0% -50%    | Denguevirus 1 | ELISPOT             | IFNg release | Positive     | 1 | 1 | 1 | 0 | 0 | 0 |
| 539780  | PMKLVMAFAIRLFL          | C     | 21   | 35   | HLA-DRB1*13:01            | >0% -50%    | Denguevirus 1 | ELISPOT             | IFNg release | Positive     | 1 | 1 | 1 | 0 | 0 | 0 |
| 539866  | RPSFNLKRVNRNRS          | C     | 10   | 24   | HLA-DRB1*08:03            | >0% -50%    | Denguevirus 1 | ELISPOT             | IFNg release | Positive     | 0 | 0 | 0 | 0 | 0 | 0 |
| 540117  | WGSFKKGAIKVLGR          | C     | 47   | 61   | HLA-DRB1*09:01            | >0% -50%    | Denguevirus 1 | ELISPOT             | IFNg release | Positive     | 1 | 1 | 1 | 0 | 0 | 0 |
| 740331  | SMMLNIMNRRKRSVT         | C     | 89   | 103  | HLA-DRB1*14:02            | >0% -50%    | Denguevirus 1 | ELISPOT             | IFNg release | Positive     | 1 | 1 | 1 | 0 | 0 | 0 |
| 867523  | KVLGRFKKEISSMLN         | C     | 79   | 93   | HLA-DRB1*02:02            | >0% -50%    | Denguevirus 1 | ELISPOT             | IFNg release | Positive     | 1 | 1 | 1 | 0 | 0 | 0 |
| 95107   | KLVMAFAIRLFL            | C     | 45   | 57   | HLA-DPw4                  | >0% -50%    | Denguevirus 1 | ELISPOT             | IFNg release | Positive     | 1 | 1 | 1 | 0 | 0 | 0 |
| 195589  | KSLLTKTSVNMCTM          | PreM  | 135  | 149  | HLA-DRB1*07:01            | >0% -50%    | Denguevirus 1 | ELISPOT             | IFNg release | Positive     | 0 | 0 | 0 | 0 | 0 | 0 |
| 869062  | SVGNMKTCLIAMDLG         | PreM  | 142  | 156  | HLA-DQA1*01:02/DQB1*06:02 | >0% -50%    | Denguevirus 1 | ELISPOT             | IFNg release | Positive     | 0 | 0 | 0 | 0 | 0 | 0 |
| 195361  | GGVTSVGVKLWHOIF         | E     | 426  | 440  | HLA-DRB1*11:01            | >0% -50%    | Denguevirus 1 | ELISPOT             | IFNg release | Positive     | 0 | 0 | 0 | 1 | 0 | 0 |
| 867378  | KCRLLMKDKLTILKGM        | E     | 564  | 578  | HLA-DRB3*02:02            | >0% -50%    | Denguevirus 1 | ELISPOT             | IFNg release | Positive     | 0 | 0 | 0 | 1 | 1 | 0 |
| 195785  | NETWKLTASRFASVE         | N51   | 982  | 996  | HLA-DRB1*07:01            | >0% -50%    | Denguevirus 1 | ELISPOT             | IFNg release | Positive     | 0 | 0 | 0 | 0 | 0 | 0 |
| 738503  | ANGILQAGKMIRRPQ         | N51   | 868  | 882  | HLA-DRB1*14:06            | >0% -50%    | Denguevirus 1 | ELISPOT             | IFNg release | Positive     | 0 | 0 | 0 | 0 | 0 | 0 |
| 740562  | TVVVGDAAGILQAQK         | N51   | 862  | 876  | HLA-DRB1*01:02            | >0% -50%    | Denguevirus 1 | ELISPOT             | IFNg release | Positive     | 0 | 0 | 0 | 0 | 0 | 0 |
| 866693  | FGIFTINWILKDRS          | N51   | 196  | 210  | HLA-DPB1*04:01            | >0% -50%    | Denguevirus 1 | ELISPOT             | IFNg release | Positive     | 1 | 1 | 1 | 0 | 0 | 0 |
| 867405  | KIIGADIQNTFTIID         | N51   | 897  | 911  | HLA-DPB1*04:02            | >0% -50%    | Denguevirus 1 | ELISPOT             | IFNg release | Positive     | 0 | 0 | 0 | 0 | 0 | 0 |
| 869721  | YGGFIFTINWILKLR         | N51   | 194  | 208  | HLA-DPB1*02:01            | >0% -50%    | Denguevirus 1 | ELISPOT             | IFNg release | Positive     | 1 | 1 | 1 | 0 | 0 | 0 |
| 167816  | SLVASVLPNSLELGGDLAMGIMI | N52a  | 109  | 133  | HLA class II              | >0% -50%    | Denguevirus 1 | ELISPOT             | IFNg release | Positive     | 0 | 0 | 0 | 0 | 0 | 0 |
| 539086  | AMGIMILKLTDFGS          | N52a  | 1255 | 1269 | HLA-DRB1*04:03            | >0% -50%    | Denguevirus 1 | ELISPOT             | IFNg release | Positive     | 0 | 0 | 0 | 1 | 0 | 0 |
| 539272  | FSHYAWKTMAMVLS          | N52a  | 1286 | 1300 | HLA-DRB1*09:01            | >0% -50%    | Denguevirus 1 | ELISPOT             | IFNg release | Positive     | 0 | 0 | 0 | 1 | 0 | 0 |
| 539517  | KTFSHYAWKTMAMM          | N52a  | 1283 | 1297 | HLA-DRB1*09:01            | >0% -50%    | Denguevirus 1 | ELISPOT             | IFNg release | Positive     | 1 | 1 | 1 | 0 | 0 | 0 |
| 539913  | SLHYAWKTMAMVLSI         | N52a  | 1287 | 1301 | HLA-DRB1*09:01            | >0% -50%    | Denguevirus 1 | ELISPOT             | IFNg release | Positive     | 0 | 0 | 0 | 1 | 0 | 0 |
| 539970  | FTSLHYAWKTMAMVLS        | N52a  | 1285 | 1299 | HLA-DRB1*14:06            | >0% -50%    | Denguevirus 1 | ELISPOT             | IFNg release | Positive     | 0 | 0 | 0 | 1 | 0 | 0 |
| 738679  | DURLCIMVGNANSD          | N52a  | 1179 | 1193 | HLA-DRB1*11:04            | >0% -50%    | Denguevirus 1 | ELISPOT             | IFNg release | Positive     | 1 | 1 | 1 | 0 | 0 | 0 |
| 739508  | LLCISIMEEVMSRS          | N52a  | 1139 | 1153 | HLA-DRB1*11:04            | >0% -50%    | Denguevirus 1 | ELISPOT             | IFNg release | Positive     | 1 | 1 | 1 | 0 | 0 | 0 |
| 867232  | ILKLLTDFQSHQWLWA        | N52a  | 1260 | 1274 | HLA-DPB1*01:01            | >0% -50%    | Denguevirus 1 | ELISPOT             | IFNg release | Positive     | 0 | 0 | 0 | 1 | 0 | 0 |
| 195622  | LDGQYIRIMQRGLLG         | N53   | 1493 | 1507 | HLA-DRB1*11:01            | >0% -50%    | Denguevirus 1 | ELISPOT             | IFNg release | Positive     | 0 | 0 | 0 | 0 | 0 | 0 |
| 539156  | GVYIRIMQRGLLGRS         | N53   | 1495 | 1509 | HLA-DRB1*12:02            | >0% -50%    | Denguevirus 1 | ELISPOT             | IFNg release | Positive     | 0 | 0 | 0 | 0 | 0 | 0 |
| 539309  | GVYIRIMQRGLLGRSQ        | N53   | 1496 | 1510 | HLA-DRB1*14:04            | >0% -50%    | Denguevirus 1 | ELISPOT             | IFNg release | Positive     | 0 | 0 | 0 | 0 | 0 | 0 |
| 866721  | FKTPFGEVGAIALDF         | N53   | 1591 | 1605 | HLA-DQA1*03:01/DQB1*03:02 | >0% -50%    | Denguevirus 1 | ELISPOT             | IFNg release | Positive     | 1 | 1 | 1 | 0 | 0 | 0 |
| 867025  | GVQFQENFHTMWHVHT        | N53   | 1514 | 1528 | HLA-DPB1*04:01            | >0% -50%    | Denguevirus 1 | ELISPOT             | IFNg release | Positive     | 0 | 0 | 0 | 0 | 0 | 0 |
| 195485  | IGLLCMVASSALLWM         | N54a  | 2177 | 2191 | HLA-DRB1*07:01            | >0% -50%    | Denguevirus 1 | ELISPOT             | IFNg release | Positive     | 0 | 0 | 0 | 0 | 0 | 0 |
| 867567  | LCVMASSALLWMANV         | N54a  | 2180 | 2194 | HLA-DQA1*01:02/DQB1*06:02 | >0% -50%    | Denguevirus 1 | ELISPOT             | IFNg release | Positive     | 0 | 0 | 0 | 0 | 0 | 0 |
| 195441  | HATMDVLCRPPASAW         | N54b  | 2269 | 2283 | HLA-DRB1*03:01            | >0% -50%    | Denguevirus 1 | ELISPOT             | IFNg release | Positive     | 0 | 0 | 0 | 0 | 0 | 0 |
| 195455  | HHHATMDVLCRPPAS         | N54b  | 2267 | 2281 | HLA-DRB1*03:01            | >0% -50%    | Denguevirus 1 | ELISPOT             | IFNg release | Positive     | 0 | 0 | 0 | 0 | 0 | 0 |
| 195561  | KPWATTIASMANIF          | N54b  | 2456 | 2470 | HLA-DRB1*07:01            | >0% -50%    | Denguevirus 1 | ELISPOT             | IFNg release | Positive     | 1 | 1 | 1 | 0 | 0 | 0 |
| 738686  | DLRPPASAWTLVAVAT        | N54b  | 2276 | 2290 | HLA-DRB1*01:02            | >0% -50%    | Denguevirus 1 | ELISPOT             | IFNg release | Positive     | 0 | 0 | 0 | 0 | 0 | 0 |
| 740732  | WTLVAVATTITPMM          | N54b  | 2283 | 2297 | HLA-DRB1*04:07            | >0% -50%    | Denguevirus 1 | ELISPOT             | IFNg release | Positive     | 0 | 0 | 0 | 0 | 0 | 0 |
| 195147  | AKNGTVMDVMSRRDQ         | N55   | 3076 | 3090 | HLA-DRB1*03:01            | >0% -50%    | Denguevirus 1 | ELISPOT             | IFNg release | Positive     | 1 | 1 | 1 | 0 | 0 | 0 |
| 195582  | KPIDDRFATALTALN         | N55</ |      |      |                           |             |               |                     |              |              |   |   |   |   |   |   |



## CD4 DENV-2 Epitopes

| Epitope_ID | AA_Seq              | Protein_Name | Start | End  | Allele                    | Step | Serotype       | Method/Technique | Assay Group  | Qualitative Measure | DENV-2 constructs of vaccines (100% identity=1, green ; else 0, red) |      |      |           |        |      |
|------------|---------------------|--------------|-------|------|---------------------------|------|----------------|------------------|--------------|---------------------|----------------------------------------------------------------------|------|------|-----------|--------|------|
|            |                     |              |       |      |                           |      |                |                  |              |                     | TV003                                                                | TDEN | DPV1 | Dengvaxia | DENVax | TV0V |
| 150404     | LRLFMALVFLRLT       | C            | 44    | 58   | HLA-DRB1*11:01            | 0%   | Dengue virus 2 | ELISPOT          | IFNg release | Positive            | 0                                                                    | 0    | 0    | 0         | 0      | 0    |
| 195121     | AGMILMPTVFAFH       | C            | 102   | 116  | HLA-DRB1*08:02            | 0%   | Dengue virus 2 | ELISPOT          | IFNg release | Positive            | 0                                                                    | 0    | 0    | 0         | 0      | 0    |
| 195369     | GILMIPTVMMAFL       | C            | 103   | 117  | HLA-DRB1*08:02            | 0%   | Dengue virus 2 | ELISPOT          | IFNg release | Positive            | 0                                                                    | 0    | 0    | 0         | 0      | 0    |
| 195413     | GPRLRFMALVAFRL      | C            | 42    | 56   | HLA-DRB1*04:01            | 0%   | Dengue virus 2 | ELISPOT          | IFNg release | Positive            | 0                                                                    | 0    | 0    | 0         | 0      | 0    |
| 195432     | GVLMIPTVMMAFHL      | C            | 103   | 117  | HLA-DRB1*08:02            | 0%   | Dengue virus 2 | ELISPOT          | IFNg release | Positive            | 0                                                                    | 0    | 0    | 0         | 0      | 0    |
| 195490     | IGRMLNLRSSRRRTA     | C            | 88    | 102  | HLA-DRB1*11:01            | 0%   | Dengue virus 2 | ELISPOT          | IFNg release | Positive            | 0                                                                    | 0    | 0    | 0         | 0      | 0    |
| 195654     | LKLYMALVAFRLT       | C            | 44    | 58   | HLA-DRB1*15:01            | 0%   | Dengue virus 2 | ELISPOT          | IFNg release | Positive            | 0                                                                    | 0    | 0    | 0         | 0      | 0    |
| 195910     | RTAGVIMMPTVFA       | C            | 100   | 114  | HLA-DRB1*08:02            | 0%   | Dengue virus 2 | ELISPOT          | IFNg release | Positive            | 0                                                                    | 0    | 0    | 0         | 0      | 0    |
| 195911     | RTASVIMMPTVMA       | C            | 100   | 114  | HLA-DRB1*08:02            | 0%   | Dengue virus 2 | ELISPOT          | IFNg release | Positive            | 0                                                                    | 0    | 0    | 0         | 0      | 0    |
| 196024     | TAGVIMMPTVMAF       | C            | 101   | 115  | HLA-DRB1*08:02            | 0%   | Dengue virus 2 | ELISPOT          | IFNg release | Positive            | 0                                                                    | 0    | 0    | 0         | 0      | 0    |
| 196084     | TVGVIMMPTVMAF       | C            | 101   | 115  | HLA-DRB1*08:02            | 0%   | Dengue virus 2 | ELISPOT          | IFNg release | Positive            | 0                                                                    | 0    | 0    | 0         | 0      | 0    |
| 53867      | RGFRKEIGRMLNLRSS    | C            | 17    | 35   | HLA class II              | 0%   | Dengue virus 2 | ELISPOT          | IFNg release | Positive            | 0                                                                    | 0    | 0    | 0         | 0      | 0    |
| 539046     | AFRLFTIPPVTGIL      | C            | 52    | 66   | HLA-DRB1*10:01            | 0%   | Dengue virus 2 | ELISPOT          | IFNg release | Positive            | 0                                                                    | 0    | 0    | 0         | 0      | 0    |
| 539051     | AFVAFRLFTIPTTA      | C            | 9     | 23   | HLA-DRB1*15:02            | 0%   | Dengue virus 2 | ELISPOT          | IFNg release | Positive            | 0                                                                    | 0    | 0    | 0         | 0      | 0    |
| 539213     | EIGRMLNLRNRRRT      | C            | 87    | 101  | HLA-DRB1*13:01            | 0%   | Dengue virus 2 | ELISPOT          | IFNg release | Positive            | 0                                                                    | 0    | 0    | 0         | 0      | 0    |
| 539343     | GRMLNIMNRRRTTAG     | C            | 89    | 103  | HLA-DRB1*13:01            | 0%   | Dengue virus 2 | ELISPOT          | IFNg release | Positive            | 0                                                                    | 0    | 0    | 0         | 0      | 0    |
| 539549     | LFTALVAFRLFTIP      | C            | 46    | 60   | HLA-DRB1*15:06            | 0%   | Dengue virus 2 | ELISPOT          | IFNg release | Positive            | 0                                                                    | 0    | 0    | 0         | 0      | 0    |
| 62853      | TAGILKRWGTTKSKANVL  | C            | 62    | 81   | HLA class II              | 0%   | Dengue virus 2 | ELISPOT          | IFNg release | Positive            | 0                                                                    | 0    | 0    | 0         | 0      | 0    |
| 739176     | IGRMLNLRNRRRTA      | C            | 88    | 102  | HLA-DRB1*14:02            | 0%   | Dengue virus 2 | ELISPOT          | IFNg release | Positive            | 0                                                                    | 0    | 0    | 0         | 0      | 0    |
| 739177     | IGRMLNLRNRRRSA      | C            | 88    | 102  | HLA-DRB1*14:02            | 0%   | Dengue virus 2 | ELISPOT          | IFNg release | Positive            | 0                                                                    | 1    | 0    | 0         | 1      | 0    |
| 739179     | IGRMLNLRNRRRSV      | C            | 88    | 102  | HLA-DRB1*14:02            | 0%   | Dengue virus 2 | ELISPOT          | IFNg release | Positive            | 0                                                                    | 0    | 0    | 0         | 0      | 0    |
| 739180     | IGRMLNLRNRRRTT      | C            | 88    | 102  | HLA-DRB1*14:02            | 0%   | Dengue virus 2 | ELISPOT          | IFNg release | Positive            | 0                                                                    | 0    | 0    | 0         | 0      | 0    |
| 739182     | IGRMLNLRNRRRTA      | C            | 88    | 102  | HLA-DRB1*14:02            | 0%   | Dengue virus 2 | ELISPOT          | IFNg release | Positive            | 0                                                                    | 0    | 0    | 0         | 0      | 0    |
| 739183     | IGRMLNLRNRRRTA      | C            | 88    | 102  | HLA-DRB1*14:02            | 0%   | Dengue virus 2 | ELISPOT          | IFNg release | Positive            | 0                                                                    | 0    | 0    | 0         | 0      | 0    |
| 740399     | STFPMMLKERNRVS      | C            | 10    | 24   | HLA-DRB1*14:02            | 0%   | Dengue virus 2 | ELISPOT          | IFNg release | Positive            | 0                                                                    | 0    | 0    | 0         | 0      | 0    |
| 740579     | VAFRLFSTIPTAGI      | C            | 51    | 65   | HLA-DRB1*04:07            | 0%   | Dengue virus 2 | ELISPOT          | IFNg release | Positive            | 0                                                                    | 0    | 0    | 0         | 0      | 0    |
| 866992     | GPLKLYMALVAFRL      | C            | 42    | 56   | HLA-DRB5*01:01            | 0%   | Dengue virus 2 | ELISPOT          | IFNg release | Positive            | 0                                                                    | 0    | 0    | 0         | 0      | 0    |
| 867734     | LKGFKEIGRMLNLR      | C            | 81    | 95   | HLA-DRB3*02:02            | 0%   | Dengue virus 2 | ELISPOT          | IFNg release | Positive            | 0                                                                    | 0    | 0    | 0         | 0      | 0    |
| 867910     | LRGFRKEIGRMLNIM     | C            | 81    | 95   | HLA-DRB3*02:02            | 0%   | Dengue virus 2 | ELISPOT          | IFNg release | Positive            | 0                                                                    | 0    | 0    | 0         | 0      | 0    |
| 867911     | LRGFRKEIGRMLNLR     | C            | 81    | 95   | HLA-DRB3*02:02            | 0%   | Dengue virus 2 | ELISPOT          | IFNg release | Positive            | 0                                                                    | 0    | 0    | 0         | 0      | 0    |
| 868674     | LRFMALVAFRLTLT      | C            | 45    | 59   | HLA-DPB1*04:02            | 0%   | Dengue virus 2 | ELISPOT          | IFNg release | Positive            | 0                                                                    | 0    | 0    | 0         | 0      | 0    |
| 150280     | HPFGFTLMAALAYTI     | PreM         | 244   | 258  | HLA-DRB1*01:01            | 0%   | Dengue virus 2 | ELISPOT          | IFNg release | Positive            | 0                                                                    | 0    | 0    | 0         | 0      | 0    |
| 180708     | ORIETWILRHFGFTM     | PreM         | 121   | 135  | HLA class II              | 0%   | Dengue virus 2 | ELISPOT          | IFNg release | Positive-Low        | 0                                                                    | 0    | 0    | 0         | 1      | 0    |
| 195318     | FOKILFLITLAVAP      | PreM         | 263   | 277  | HLA-DRB1*07:01            | 0%   | Dengue virus 2 | ELISPOT          | IFNg release | Positive            | 0                                                                    | 0    | 0    | 0         | 0      | 0    |
| 195320     | FORTLFLITLAVAP      | PreM         | 263   | 277  | HLA-DRB1*07:01            | 0%   | Dengue virus 2 | ELISPOT          | IFNg release | Positive            | 0                                                                    | 0    | 0    | 0         | 0      | 0    |
| 195448     | HQRAFLITLATA        | PreM         | 262   | 276  | HLA-DRB1*07:01            | 0%   | Dengue virus 2 | ELISPOT          | IFNg release | Positive            | 1                                                                    | 1    | 1    | 1         | 0      | 1    |
| 195504     | ILRHFGFTLMAALA      | PreM         | 241   | 255  | HLA-DRB1*15:01            | 0%   | Dengue virus 2 | ELISPOT          | IFNg release | Positive            | 0                                                                    | 0    | 0    | 0         | 0      | 0    |
| 196045     | THSRALFLLTAV        | PreM         | 261   | 275  | HLA-DRB1*07:01            | 0%   | Dengue virus 2 | ELISPOT          | IFNg release | Positive            | 1                                                                    | 1    | 1    | 1         | 1      | 1    |
| 196232     | YQFRLIFLLTAVT       | PreM         | 262   | 276  | HLA-DRB1*07:01            | 0%   | Dengue virus 2 | ELISPOT          | IFNg release | Positive            | 0                                                                    | 0    | 0    | 0         | 0      | 0    |
| 739425     | LYATIGTTHFORALI     | PreM         | 254   | 268  | HLA-DRB1*04:07            | 0%   | Dengue virus 2 | ELISPOT          | IFNg release | Positive            | 1                                                                    | 1    | 1    | 1         | 1      | 1    |
| 866485     | EDGVNMCITLMAIDLG    | PreM         | 142   | 156  | HLA-DQA1*01:01/DOB1*06:02 | 0%   | Dengue virus 2 | ELISPOT          | IFNg release | Positive            | 0                                                                    | 0    | 0    | 0         | 0      | 0    |
| 86650      | RHPGFTLMAALAYTI     | PreM         | 243   | 257  | HLA-DQA1*01:02/DOB1*06:02 | 0%   | Dengue virus 2 | ELISPOT          | IFNg release | Positive            | 0                                                                    | 0    | 0    | 0         | 0      | 0    |
| 195793     | NLEYTIMTPHSGEE      | E            | 134   | 148  | HLA-DRB1*04:01            | 0%   | Dengue virus 2 | ELISPOT          | IFNg release | Positive            | 0                                                                    | 0    | 0    | 0         | 0      | 0    |
| 195952     | SGVSWTKMLIGVIL      | E            | 449   | 463  | HLA-DRB1*15:01            | 0%   | Dengue virus 2 | ELISPOT          | IFNg release | Positive            | 0                                                                    | 1    | 0    | 1         | 1      | 0    |
| 196022     | SVWTKMLIGVITWI      | E            | 452   | 466  | HLA-DRB1*08:02            | 0%   | Dengue virus 2 | ELISPOT          | IFNg release | Positive            | 0                                                                    | 1    | 0    | 1         | 1      | 0    |
| 539427     | IQKTLVTFKNPHAK      | E            | 512   | 526  | HLA-DRB1*04:03            | 0%   | Dengue virus 2 | ELISPOT          | IFNg release | Positive            | 0                                                                    | 0    | 0    | 0         | 0      | 0    |
| 539462     | KEMLVTFKNPHAKRQ     | E            | 514   | 528  | HLA-DRB1*04:03            | 0%   | Dengue virus 2 | ELISPOT          | IFNg release | Positive            | 0                                                                    | 0    | 0    | 0         | 0      | 0    |
| 539479     | KKTLVTFKNPHAKRQ     | E            | 514   | 528  | HLA-DRB1*14:04            | 0%   | Dengue virus 2 | ELISPOT          | IFNg release | Positive            | 0                                                                    | 0    | 0    | 0         | 0      | 0    |
| 539629     | LSVTLLVGVFTVLYL     | E            | 475   | 489  | HLA-DRB1*15:06            | 0%   | Dengue virus 2 | ELISPOT          | IFNg release | Positive            | 0                                                                    | 0    | 0    | 0         | 0      | 0    |
| 738866     | EYTIMTPHSGEEHA      | E            | 136   | 150  | HLA-DRB1*04:07            | 0%   | Dengue virus 2 | ELISPOT          | IFNg release | Positive            | 1                                                                    | 0    | 1    | 0         | 1      | 1    |
| 867375     | KAWLVHRRQFLDLPF     | E            | 204   | 218  | HLA-DQA1*01:01/DOB1*05:01 | 0%   | Dengue virus 2 | ELISPOT          | IFNg release | Positive            | 0                                                                    | 0    | 0    | 0         | 0      | 0    |
| 868347     | PPFGFTLMAALAYTI     | E            | 371   | 385  | HLA-DQA1*03:01/DOB1*03:02 | 0%   | Dengue virus 2 | ELISPOT          | IFNg release | Positive            | 0                                                                    | 0    | 0    | 0         | 0      | 0    |
| 195954     | SHNDSVIGDEPTEA      | NS1          | 903   | 917  | HLA-DRB1*04:01            | 0%   | Dengue virus 2 | ELISPOT          | IFNg release | Positive            | 0                                                                    | 1    | 0    | 0         | 1      | 0    |
| 539708     | NDTWKMEKASFEVKE     | NS1          | 982   | 996  | HLA-DRB1*09:01            | 0%   | Dengue virus 2 | ELISPOT          | IFNg release | Positive            | 0                                                                    | 0    | 0    | 0         | 0      | 0    |
| 739191     | IKGIMHAGKSLRPQ      | NS1          | 868   | 882  | HLA-DRB1*14:02            | 0%   | Dengue virus 2 | ELISPOT          | IFNg release | Positive            | 0                                                                    | 0    | 0    | 0         | 0      | 0    |
| 866699     | FGVFTTNWILKREK      | NS1          | 935   | 949  | HLA-DPB1*04:01            | 0%   | Dengue virus 2 | ELISPOT          | IFNg release | Positive            | 0                                                                    | 0    | 1    | 0         | 0      | 0    |
| 866829     | GGFTFTTNWILKRE      | NS1          | 934   | 948  | HLA-DPB1*01:01            | 0%   | Dengue virus 2 | ELISPOT          | IFNg release | Positive            | 0                                                                    | 0    | 0    | 0         | 0      | 0    |
| 866831     | GGVFTTNWILKRE       | NS1          | 934   | 948  | HLA-DPB1*04:01            | 0%   | Dengue virus 2 | ELISPOT          | IFNg release | Positive            | 0                                                                    | 0    | 1    | 0         | 0      | 0    |
| 869722     | YGVFTTNWILKRL       | NS1          | 933   | 947  | HLA-DPB1*04:01            | 0%   | Dengue virus 2 | ELISPOT          | IFNg release | Positive            | 0                                                                    | 0    | 1    | 0         | 0      | 0    |
| 150245     | GMGVITLALLAAVYK     | NS2a         | 1196  | 1210 | HLA-DRB1*01:01            | 0%   | Dengue virus 2 | ELISPOT          | IFNg release | Positive            | 0                                                                    | 0    | 0    | 0         | 0      | 0    |
| 167819     | SSQKTDVITPLATIKGLNP | NS2a         | 184   | 203  | HLA-DP                    | 0%   | Dengue virus 2 | ELISPOT          | IFNg release | Positive            | 0                                                                    | 1    | 0    | 0         | 1      | 0    |
| 195269     | ERYQLAVTITAIICV     | NS2a         | 1268  | 1282 | HLA-DRB1*07:01            | 0%   | Dengue virus 2 | ELISPOT          | IFNg release | Positive            | 0                                                                    | 0    | 0    | 0         | 0      | 0    |
| 195523     | IPVLVLIGLNPTAI      | NS2a         | 1319  | 1333 | HLA-DRB1*08:02            | 0%   | Dengue virus 2 | ELISPOT          | IFNg release | Positive            | 0                                                                    | 0    | 0    | 0         | 0      | 0    |
| 195712     | LSLTHIRSTPLIIMA     | NS2a         | 1275  | 1289 | HLA-DRB1*07:01            | 0%   | Dengue virus 2 | ELISPOT          | IFNg release | Positive            | 0                                                                    | 0    | 0    | 0         | 0      | 0    |
| 195763     | MMVLKIVRKMERQYL     | NS2a         | 1258  | 1272 | HLA-DRB1*03:01            | 0%   | Dengue virus 2 | ELISPOT          | IFNg release | Positive            | 0                                                                    | 0    | 0    | 0         | 0      | 0    |
| 196217     | WVSCITLAAVSVSP      | NS2a         | 1292  | 1306 | HLA-DRB1*04:01            | 0%   | Dengue virus 2 | ELISPOT          | IFNg release | Positive            | 0                                                                    | 0    | 0    | 0         | 0      | 0    |
| 539077     | ALGIMLVKIVRSMEK     | NS2a         | 1255  | 1269 | HLA-DRB1*12:02            | 0%   | Dengue virus 2 | ELISPOT          | IFNg release | Positive            | 0                                                                    | 0    | 0    | 0         | 0      | 0    |
| 539082     | ALTKGLWYTAAILT      | NS2a         | 1232  | 1246 | HLA-DRB1*09:01            | 0%   | Dengue virus 2 | ELISPOT          | IFNg release | Positive            | 0                                                                    | 0    | 0    | 0         | 0      | 0    |
| 539110     | AWALGMVYLKIVRNM     | NS2a         | 1253  | 1267 | HLA-DRB1*13:01            | 0%   | Dengue virus 2 | ELISPOT          | IFNg release | Positive            | 0                                                                    | 0    | 0    | 0         | 0      | 0    |
| 539392     | ILGIMVLKIVRSME      | NS2a         | 1254  | 1268 | HLA-DRB1*13:01            | 0%   | Dengue virus 2 | ELISPOT          | IFNg release | Positive            | 0                                                                    | 0    | 0    | 0         | 0      | 0    |
| 539556     | ILGIMVLKIVRMEKY     | NS2a         | 1256  | 1270 | HLA-DRB1*12:02            | 0%   | Dengue virus 2 | ELISPOT          | IFNg release | Positive            | 0                                                                    | 0    | 0    | 0         | 0      | 0    |
| 539557     | LGIMVLKIVRSMEKY     | NS2a         | 1256  | 1270 | HLA-DRB1*12:02            | 0%   | Dengue virus 2 | ELISPOT          | IFNg release | Positive            | 0                                                                    | 0    | 0    | 0         | 0      | 0    |
| 539706     | NAWKVSCITLAAVSV     | NS2a         | 1290  | 1304 | HLA-DRB1*09:01            | 0%   | Dengue virus 2 | ELISPOT          | IFNg release | Positive            | 0                                                                    | 0    | 0    | 0         | 0      | 0    |
| 539893     | SCITLAAVSVSPILL     | NS2a         | 1295  | 1309 | HLA-DRB1*10:01            | 0%   | Dengue virus 2 | ELISPOT          | IFNg release | Positive            | 0                                                                    | 0    | 0    | 0         | 0      | 0    |
| 195913     | RTGLLVISGVFVSI      | NS2b         | 1445  | 1459 | HLA-DRB1*08:02            | 0%   | Dengue virus 2 | ELISPOT          | IFNg release | Positive            | 0                                                                    | 0    | 0    | 0         | 0      | 0    |
| 539574     | LIRTLGVISGVFPV      | NS2b         | 1443  | 1457 | HLA-DRB1*13:01            | 0%   | Dengue virus 2 | ELISPOT          | IFNg release | Positive            | 0                                                                    | 0    | 0    | 0         | 0      | 0    |
| 24916      | HTGREIVDLCHATE      | NS3          | 251   | 265  | HLA-DPw2                  | 0%   | Dengue virus 2 | ICS              | IFNg release | Positive            | 0                                                                    | 0    | 0    | 0         | 0      | 0    |
| 539283     | GAYRKIGRLIGVSG      | NS3          | 1496  | 1510 | HLA-DRB1*08:03            | 0%   | Dengue virus 2 | ELISPOT          | IFNg release | Positive            | 0                                                                    | 0    | 0    | 0         | 0      | 0    |
| 54390      | RKTLMDLHPGAGTK      | NS3          | 618   | 632  | HLA class II              | 0%   | Dengue virus 2 | ICS              | IFNg release | Positive            | 0                                                                    | 0    | 1    | 0         | 0      | 0    |
| 868183     | MWHTVGAVALMHKRG     | NS3          | 1524  | 1538 | HLA-DRB3*02:02            | 0%   | Dengue virus 2 | ELISPOT          | IFNg release | Positive            | 0                                                                    | 0    | 0    | 0         | 0      | 0    |
| 150192     | ELLTLTLAAVIGG       | NS4a         | 2146  | 2160 | HLA-DRB1*01:01            | 0%   | Dengue virus 2 | ELISPOT          | IFNg release | Positive            | 0                                                                    | 0    | 0    | 0         | 0      | 0    |
| 195810     | NLTWYMAILLTVA       | NS4a         | 2225  | 2239 | HLA-DRB1*07:01            | 0%   | Dengue virus 2 | ELISPOT          | IFNg release | Positive            | 0                                                                    | 0    | 0    | 0         | 0      | 0    |
| 195118     | AGLLFSMIRNTTSAR     | NS4b         | 2476  | 2490 | HLA-DRB1*04:01            | 0%   | Dengue virus 2 | ELISPOT          | IFNg release | Positive            | 0                                                                    | 0    | 0    | 0         | 0      | 0    |
| 195270     | ESSENLDDLRPAS       | NS4b         | 2265  | 2279 | HLA-DRB1*03:01            | 0%   | Dengue virus 2 | ELISPOT          | IFNg release | Positive            | 0                                                                    | 0    |      |           |        |      |



|         |                     |      |      |      |                           |           |                |                     |              |              |   |   |   |   |   |   |
|---------|---------------------|------|------|------|---------------------------|-----------|----------------|---------------------|--------------|--------------|---|---|---|---|---|---|
| 539689  | MRGAKRMALIGTAW      | E    | 406  | 420  | HLA-DRB1*15:06            | 100%      | Dengue virus 2 | ELISPOT             | IFNg release | Positive     | 1 | 1 | 1 | 1 | 1 | 0 |
| 741744  | MRCIGISNRDFFVGVSSGW | E    | 281  | 300  | HLA class II              | 100%      | Dengue virus 2 | ELISPOT             | IFNg release | Positive     | 1 | 1 | 1 | 1 | 0 | 1 |
| 866193  | ATEQMSSGNLLFTG      | E    | 257  | 271  | HLA-DRB3*02:02            | 100%      | Dengue virus 2 | ELISPOT             | IFNg release | Positive     | 1 | 1 | 1 | 1 | 1 | 1 |
| 150273  | GVTYLLAALFAKVRP     | NS2a | 1198 | 1212 | HLA-DRB1*01:01            | 100%      | Dengue virus 2 | ELISPOT             | IFNg release | Positive     | 0 | 1 | 1 | 0 | 1 | 0 |
| 540094  | VTYLLAALFAKVRPT     | NS2a | 1199 | 1213 | HLA-DRB1*12:02            | 100%      | Dengue virus 2 | ELISPOT             | IFNg release | Positive     | 0 | 1 | 1 | 0 | 1 | 0 |
| 150433  | MANGMVSILASLLKE     | NS2b | 1354 | 1368 | HLA-DRB1*01:01            | 100%      | Dengue virus 2 | ELISPOT             | IFNg release | Positive     | 0 | 1 | 1 | 0 | 1 | 0 |
| 150512  | IMAKMVSILASLL       | NS2b | 8    | 22   | HLA-DRB1*07:01            | 100%      | Dengue virus 2 | ELISPOT             | IFNg release | Positive     | 0 | 1 | 1 | 0 | 1 | 0 |
| 155992  | SLLKNDIPMTGFLV      | NS2b | 19   | 33   | HLA-DRB1*03:01            | 100%      | Dengue virus 2 | ELISPOT             | IFNg release | Positive     | 0 | 1 | 1 | 0 | 1 | 0 |
| 866986  | GMVSISSALSKNDI      | NS2b | 1357 | 1371 | HLA-DRB1*01:01            | 100%      | Dengue virus 2 | ELISPOT             | IFNg release | Positive     | 0 | 1 | 1 | 0 | 1 | 0 |
| 1067121 | GKGVGLYGVNGSVVTRS   | NS3  | 1619 | 1633 | HLA-DRB1*15:01            | 100%      | Dengue virus 2 | ELISPOT             | IFNg release | Positive     | 0 | 1 | 1 | 0 | 1 | 0 |
| 12372   | EHTGFEVLDLMCHAT     | NS3  | 250  | 264  | HLA class II              | 100%      | Dengue virus 2 | ELISPOT             | IFNg release | Positive     | 0 | 1 | 1 | 0 | 1 | 0 |
| 12606   | EIVDLDMCHATTMRL     | NS3  | 255  | 269  | HLA class II              | 100%      | Dengue virus 2 | ELISPOT             | IFNg release | Positive     | 0 | 1 | 1 | 0 | 1 | 0 |
| 1392191 | GREIVDLDMCHATTM     | NS3  | 1728 | 1742 | HLA class II              | 100%      | Dengue virus 2 | biological activity | activation   | Positive     | 0 | 1 | 1 | 0 | 1 | 0 |
| 139758  | GKTKRYLPALVREAI     | NS3  | 1673 | 1687 | HLA-DRB1*09:01            | 100%      | Dengue virus 2 | ELISPOT             | IFNg release | Positive     | 0 | 1 | 1 | 0 | 1 | 0 |
| 180698  | PNNYLIMDEAHTFD      | NS3  | 1751 | 1765 | HLA class II              | 100%      | Dengue virus 2 | ELISPOT             | IFNg release | Positive     | 0 | 1 | 1 | 0 | 1 | 0 |
| 195295  | FHTMMVHVRGAVLMH     | NS3  | 1521 | 1535 | HLA-DRB1*07:01            | 100%      | Dengue virus 2 | ELISPOT             | IFNg release | Positive     | 0 | 1 | 1 | 0 | 1 | 0 |
| 195420  | GFTHTMMVHVRGAVL     | NS3  | 1519 | 1533 | HLA-DRB1*07:01            | 100%      | Dengue virus 2 | ELISPOT             | IFNg release | Positive     | 0 | 1 | 1 | 0 | 1 | 0 |
| 195888  | RGLRTLAPTRVVA       | NS3  | 1689 | 1703 | HLA-DRB1*08:02            | 100%      | Dengue virus 2 | ELISPOT             | IFNg release | Positive     | 0 | 1 | 1 | 0 | 1 | 0 |
| 21115   | GLRTLILAPTRVVA      | NS3  | 1690 | 1704 | HLA-DRB1*04:03            | 100%      | Dengue virus 2 | ELISPOT             | IFNg release | Positive     | 0 | 1 | 1 | 0 | 1 | 0 |
| 26965   | ILAPTRVVAEMEEA      | NS3  | 1695 | 1709 | HLA-DQA1*03:01/DOB1*03:02 | 100%      | Dengue virus 2 | ELISPOT             | IFNg release | Positive     | 0 | 1 | 1 | 0 | 1 | 0 |
| 34231   | KVVLGVGVNGVITRSR    | NS3  | 145  | 159  | HLA class II              | 100%      | Dengue virus 2 | ELISPOT             | IFNg release | Positive     | 0 | 1 | 1 | 0 | 1 | 0 |
| 36560   | LIIMDEAHTFD         | NS3  | 1755 | 1769 | HLA-DQA1*01:01/DOB1*05:01 | 100%      | Dengue virus 2 | ELISPOT             | IFNg release | Positive     | 0 | 1 | 1 | 0 | 1 | 0 |
| 39215   | RLTLAPTRVVAE        | NS3  | 1691 | 1705 | HLA-DRB1*12:02            | 100%      | Dengue virus 2 | ELISPOT             | IFNg release | Positive     | 0 | 1 | 1 | 0 | 1 | 0 |
| 49766   | PTRVVAEMEEALRG      | NS3  | 223  | 237  | HLA-DRB1*15:01            | 100%      | Dengue virus 2 | ICS                 | IFNg release | Positive     | 0 | 1 | 1 | 0 | 1 | 0 |
| 539025  | AAGIFTATPPGSRD      | NS3  | 1784 | 1798 | HLA-DRB1*04:03            | 100%      | Dengue virus 2 | ELISPOT             | IFNg release | Positive     | 0 | 1 | 1 | 0 | 1 | 0 |
| 539041  | AEMEEALRGLPIRYQ     | NS3  | 1704 | 1718 | HLA-DRB1*13:01            | 100%      | Dengue virus 2 | ELISPOT             | IFNg release | Positive     | 0 | 1 | 1 | 0 | 1 | 0 |
| 539289  | GEAAGIFTATPPGGS     | NS3  | 1782 | 1796 | HLA-DRB1*04:03            | 100%      | Dengue virus 2 | ELISPOT             | IFNg release | Positive     | 0 | 1 | 1 | 0 | 1 | 0 |
| 539448  | IVREAIKRLTLIL       | NS3  | 1682 | 1696 | HLA-DRB1*12:02            | 100%      | Dengue virus 2 | ELISPOT             | IFNg release | Positive     | 0 | 1 | 1 | 0 | 1 | 0 |
| 539573  | LILAPTRVVAEMEE      | NS3  | 1694 | 1708 | HLA-DRB1*13:01            | 100%      | Dengue virus 2 | ELISPOT             | IFNg release | Positive     | 0 | 1 | 1 | 0 | 1 | 0 |
| 540056  | VLMMHKGRIEFSWAD     | NS3  | 1518 | 1532 | HLA-DRB1*13:01            | 100%      | Dengue virus 2 | ELISPOT             | IFNg release | Positive     | 0 | 1 | 1 | 0 | 1 | 0 |
| 63672   | FTHTMVHVRGAVLM      | NS3  | 45   | 59   | HLA class II              | 100%      | Dengue virus 2 | ELISPOT             | IFNg release | Positive     | 0 | 1 | 1 | 0 | 1 | 0 |
| 64666   | TKRYLPALVREAIK      | NS3  | 200  | 214  | HLA class II              | 100%      | Dengue virus 2 | ELISPOT             | IFNg release | Positive     | 0 | 1 | 1 | 0 | 1 | 0 |
| 740081  | REAIKRLTLILAP       | NS3  | 1670 | 1684 | HLA-DRB1*14:06            | 100%      | Dengue virus 2 | ELISPOT             | IFNg release | Positive     | 0 | 1 | 1 | 0 | 1 | 0 |
| 740193  | RTLILAPTRVVAEM      | NS3  | 1678 | 1692 | HLA-DRB1*14:06            | 100%      | Dengue virus 2 | ELISPOT             | IFNg release | Positive     | 0 | 1 | 1 | 0 | 1 | 0 |
| 866477  | EALRGPIRYQITGAI     | NS3  | 1708 | 1722 | HLA-DRB1*11:01            | 100%      | Dengue virus 2 | ELISPOT             | IFNg release | Positive     | 0 | 1 | 1 | 0 | 1 | 0 |
| 866734  | RYLPALVREAIK        | NS3  | 1671 | 1685 | HLA-DRB1*04:03            | 100%      | Dengue virus 2 | ELISPOT             | IFNg release | Positive     | 0 | 1 | 1 | 0 | 1 | 0 |
| 866724  | TLTLAPTRVVAEME      | NS3  | 1691 | 1705 | HLA-DQA1*01:02/DOB1*06:02 | 100%      | Dengue virus 2 | ELISPOT             | IFNg release | Positive     | 0 | 1 | 1 | 0 | 1 | 0 |
| 150362  | LETLLTLTLATVIG      | NS4a | 2145 | 2159 | HLA-DRB1*01:01            | 100%      | Dengue virus 2 | ELISPOT             | IFNg release | Positive     | 0 | 1 | 1 | 0 | 1 | 0 |
| 195107  | ASILEFEFIVLIL       | NS4a | 2185 | 2199 | HLA-DRB1*15:01            | 100%      | Dengue virus 2 | ELISPOT             | IFNg release | Positive     | 0 | 1 | 1 | 0 | 1 | 0 |
| 195767  | MTLGMCCITASILL      | NS4a | 2160 | 2174 | HLA-DRB1*07:01            | 100%      | Dengue virus 2 | ELISPOT             | IFNg release | Positive     | 0 | 1 | 1 | 0 | 1 | 0 |
| 196054  | LETLLTLTLATVIG      | NS4a | 2144 | 2158 | HLA-DRB1*15:01            | 100%      | Dengue virus 2 | ELISPOT             | IFNg release | Positive     | 0 | 1 | 1 | 0 | 1 | 0 |
| 738567  | AYNHALSEPETLET      | NS4a | 2119 | 2133 | HLA-DRB1*04:07            | 100%      | Dengue virus 2 | ELISPOT             | IFNg release | Positive     | 0 | 1 | 1 | 0 | 1 | 0 |
| 195882  | RFWNTITAVSMANIF     | NS4b | 2454 | 2468 | HLA-DRB1*07:01            | 100%      | Dengue virus 2 | ELISPOT             | IFNg release | Positive     | 0 | 1 | 1 | 0 | 1 | 0 |
| 195974  | SNLIDILRPASAWT      | NS4b | 2155 | 2169 | HLA-DRB1*03:01            | 100%      | Dengue virus 2 | ELISPOT             | IFNg release | Positive     | 0 | 1 | 1 | 0 | 1 | 0 |
| 539724  | NIIFRGSLAGALFL      | NS4b | 2452 | 2466 | HLA-DRB1*09:01            | 100%      | Dengue virus 2 | ELISPOT             | IFNg release | Positive     | 0 | 1 | 1 | 0 | 1 | 0 |
| 739437  | LDLILRPASAWTLVA     | NS4b | 2257 | 2271 | HLA-DRB1*01:02            | 100%      | Dengue virus 2 | ELISPOT             | IFNg release | Positive     | 0 | 1 | 1 | 0 | 1 | 0 |
| 866802  | FWNTITAVSMANIFR     | NS4b | 2455 | 2469 | HLA-DQA1*01:02/DOB1*06:02 | 100%      | Dengue virus 2 | ELISPOT             | IFNg release | Positive     | 0 | 1 | 1 | 0 | 1 | 0 |
| 866989  | TAIANGQATVLMGLK     | NS4b | 2309 | 2323 | HLA-DQA1*01:02/DOB1*06:02 | 100%      | Dengue virus 2 | ELISPOT             | IFNg release | Positive     | 0 | 1 | 1 | 0 | 1 | 0 |
| 190862  | MVTQMAMTITPFGQDR    | NS5  | 2828 | 2844 | HLA class II              | 100%      | Dengue virus 2 | ICS                 | IFNg release | Positive     | 0 | 1 | 1 | 0 | 1 | 0 |
| 195200  | CEICVNMIMKGRREK     | NS5  | 2924 | 2938 | HLA-DRB1*11:01            | 100%      | Dengue virus 2 | ELISPOT             | IFNg release | Positive     | 0 | 1 | 1 | 0 | 1 | 0 |
| 196213  | DELIGBARISGAGW      | NS5  | 3223 | 3237 | HLA-DRB1*08:02            | 100%      | Dengue virus 2 | ELISPOT             | IFNg release | Positive     | 0 | 1 | 1 | 0 | 1 | 0 |
| 196263  | EDMHWFSRENSLSVE     | NS5  | 2985 | 2999 | HLA-DRB1*04:01            | 100%      | Dengue virus 2 | ELISPOT             | IFNg release | Positive     | 0 | 1 | 1 | 0 | 1 | 0 |
| 195409  | GNIVSSNMISRMIL      | NS5  | 2717 | 2731 | HLA-DRB1*07:01            | 100%      | Dengue virus 2 | ELISPOT             | IFNg release | Positive     | 0 | 1 | 1 | 0 | 1 | 0 |
| 195948  | SGNIVSSNMISRMIL     | NS5  | 2716 | 2730 | HLA-DRB1*04:01            | 100%      | Dengue virus 2 | ELISPOT             | IFNg release | Positive     | 0 | 1 | 1 | 0 | 1 | 0 |
| 196187  | VSSVNMISRMILNRF     | NS5  | 2720 | 2734 | HLA-DRB1*15:01            | 100%      | Dengue virus 2 | ELISPOT             | IFNg release | Positive     | 0 | 1 | 1 | 0 | 1 | 0 |
| 196210  | WAKNQITAINQVRS      | NS5  | 3336 | 3350 | HLA-DRB1*03:01            | 100%      | Dengue virus 2 | ELISPOT             | IFNg release | Positive     | 0 | 0 | 1 | 0 | 0 | 0 |
| 539436  | ISGDDCVKPLDDRFA     | NS5  | 3151 | 3166 | HLA class II              | 100%      | Dengue virus 2 | ICS                 | IFNg release | Positive     | 0 | 1 | 1 | 0 | 1 | 0 |
| 539871  | RRLDLRLAANAICSAV    | NS5  | 3260 | 3274 | HLA-DRB3*02:02            | 100%      | Dengue virus 2 | ELISPOT             | IFNg release | Positive     | 0 | 1 | 1 | 0 | 1 | 0 |
| 866172  | ASGNIVSSNMISRM      | NS5  | 2715 | 2729 | HLA-DRB3*02:02            | 100%      | Dengue virus 2 | ELISPOT             | IFNg release | Positive     | 0 | 1 | 1 | 0 | 1 | 0 |
| 867600  | LEFALGFLNEDHWF      | NS5  | 2975 | 2989 | HLA-DRB1*04:01            | 100%      | Dengue virus 2 | ELISPOT             | IFNg release | Positive     | 0 | 1 | 1 | 0 | 1 | 0 |
| 868037  | RDLRLAANAICSAVP     | NS5  | 3261 | 3275 | HLA-DQA1*05:01/DOB1*02:01 | 100%      | Dengue virus 2 | ELISPOT             | IFNg release | Positive     | 0 | 1 | 1 | 0 | 1 | 0 |
| 868640  | RLEFALGFLNEDH       | NS5  | 2973 | 2987 | HLA-DRB1*01:01            | 100%      | Dengue virus 2 | ELISPOT             | IFNg release | Positive     | 0 | 1 | 1 | 0 | 1 | 0 |
| 869426  | VESWEIPEYVKRED      | NS5  | 3321 | 3335 | HLA-DQA1*01:01/DOB1*05:01 | 100%      | Dengue virus 2 | ELISPOT             | IFNg release | Positive     | 0 | 1 | 1 | 0 | 1 | 0 |
| 1066603 | ARNPTFNMILKRENR     | C    | 8    | 22   | HLA-DRB1*11:01            | 81% <100% | Dengue virus 2 | ELISPOT             | IFNg release | Positive-Low | 0 | 1 | 1 | 0 | 0 | 0 |
| 150105  | AFRLRFLTIPTAGIL     | C    | 52   | 66   | HLA-DRB1*01:01            | 81% <100% | Dengue virus 2 | ELISPOT             | IFNg release | Positive     | 0 | 1 | 1 | 0 | 1 | 0 |
| 150369  | LKLFMALVAFRLRFL     | C    | 44   | 58   | HLA-DRB1*01:01            | 81% <100% | Dengue virus 2 | ELISPOT             | IFNg release | Positive     | 0 | 1 | 1 | 0 | 1 | 0 |
| 180597  | LFMALVAFRLTIPT      | C    | 66   | 80   | HLA class II              | 81% <100% | Dengue virus 2 | ELISPOT             | IFNg release | Positive     | 0 | 1 | 1 | 0 | 1 | 0 |
| 180768  | TIKSKAINVLRGPR      | C    | 71   | 85   | HLA class II              | 81% <100% | Dengue virus 2 | ELISPOT             | IFNg release | Positive     | 0 | 1 | 1 | 0 | 1 | 0 |
| 195307  | FMALVAFRLTIPT       | C    | 47   | 61   | HLA-DRB1*11:01            | 81% <100% | Dengue virus 2 | ELISPOT             | IFNg release | Positive     | 0 | 1 | 1 | 0 | 1 | 0 |
| 195573  | KLFMALVAFRLTLI      | C    | 45   | 59   | HLA-DRB1*15:01            | 81% <100% | Dengue virus 2 | ELISPOT             | IFNg release | Positive     | 0 | 1 | 1 | 0 | 1 | 0 |
| 195730  | LVAFRLTIPTTPTAG     | C    | 50   | 64   | HLA-DRB1*04:01            | 81% <100% | Dengue virus 2 | ELISPOT             | IFNg release | Positive     | 0 | 1 | 1 | 0 | 1 | 0 |
| 195744  | MALVAFRLTIPTTPT     | C    | 48   | 62   | HLA-DRB1*04:01            | 81% <100% | Dengue virus 2 | ELISPOT             | IFNg release | Positive     | 0 | 1 | 1 | 0 | 1 | 0 |
| 195889  | RGLPKLFMALVAFRL     | C    | 41   | 55   | HLA-DRB1*04:01            | 81% <100% | Dengue virus 2 | ELISPOT             | IFNg release | Positive     | 0 | 1 | 1 | 0 | 1 | 0 |
| 196064  | TPFNMILKRENRVST     | C    | 11   | 25   | HLA-DRB1*08:02            | 81% <100% | Dengue virus 2 | ELISPOT             | IFNg release | Positive     | 0 | 1 | 1 | 0 | 1 | 0 |
| 196093  | VAFRLTIPTTPTAGI     | C    | 51   | 65   | HLA-DRB1*04:01            | 81% <100% | Dengue virus 2 | ELISPOT             | IFNg release | Positive     | 0 | 1 | 1 | 0 | 1 | 0 |
| 196213  | WGTKSKAINVLRG       | C    | 69   | 83   | HLA-DRB1*07:01            | 81% <100% | Dengue virus 2 | ELISPOT             | IFNg release | Positive     | 0 | 1 | 1 | 0 | 1 | 0 |
| 26836   | IKKSKAINVLRGFKIEGRM | C    | 72   | 91   | HLA class II              | 81% <100% | Dengue virus 2 | ELISPOT             | IFNg release | Positive     | 0 | 1 | 1 | 0 | 1 | 0 |
| 539083  | ALVAFRLTIPTTPTA     | C    | 49   | 63   | HLA-DRB1*12:02            | 81% <100% | Dengue virus 2 | ELISPOT             | IFNg release | Positive     | 0 | 1 | 1 | 0 | 1 | 0 |
| 539264  | FLRFLTIPTTPTAGIL    | C    | 53   | 67   | HLA-DRB1*14:02            | 81% <100% | Dengue virus 2 | ELISPOT             | IFNg release | Positive     | 0 | 1 | 1 | 0 | 1 | 0 |
| 539410  | IKKSKAINVLRGPR      | C    | 72   | 86   | HLA-DRB1*14:04            | 81% <100% | Dengue virus 2 | ELISPOT             | IFNg release | Positive     | 0 | 1 | 1 | 0 | 1 | 0 |
| 539514  | KSKAINVLRGPR        | C    | 74   | 88   | HLA-DRB1*12:02            | 81% <100% | Dengue virus 2 | ELISPOT             | IFNg release | Positive     | 0 | 1 | 1 | 0 | 1 | 0 |
| 539612  | LOGRGPLKLFMALVA     | C    | 38   | 52   | HLA-DRB1*15:02            | 81% <100% | Dengue virus 2 | ELISPOT             | IFNg release | Positive     | 0 | 1 | 1 | 0 | 1 | 0 |
| 539887  | RWGTIKKSKAINVLR     | C    | 68   | 82   | HLA-DRB1*08:03            | 81% <100% | Dengue virus 2 | ELISPOT             | IFNg release | Positive     | 0 | 1 | 1 | 0 | 1 | 0 |
| 540069  | VQDLTKRFLSGMLQG     | C    | 26   | 40   | HLA-DRB1*13:01            | 81% <100% | Dengue virus 2 | ELISPOT             | IFNg release | Positive     | 0 | 1 | 1 | 0 | 1 | 0 |
| 739879  | PFNMILKRENRVST      | C    | 12   | 26   | HLA-DRB1*14:02            | 81% <100% | Dengue virus 2 | ELISPOT             | IFNg release | Positive     | 0 |   |   |   |   |   |



|         |                    |      |      |      |                           |           |                |         |              |              |   |   |   |   |   |   |
|---------|--------------------|------|------|------|---------------------------|-----------|----------------|---------|--------------|--------------|---|---|---|---|---|---|
| 195752  | MEKYQLAVTIMALC     | NS2a | 1154 | 1168 | HLA-DRB1*04:07            | 81% <100% | Dengue virus 2 | ELISPOT | IFNg release | Positive     | 0 | 1 | 1 | 0 | 1 | 0 |
| 195798  | NNMEYQLAVTIMAIL    | NS2a | 1266 | 1280 | HLA-DRB1*04:01            | 81% <100% | Dengue virus 2 | ELISPOT | IFNg release | Positive     | 0 | 1 | 0 | 0 | 1 | 0 |
| 196174  | VNMMEYQLAVTIMA     | NS2a | 1264 | 1278 | HLA-DRB1*13:01            | 81% <100% | Dengue virus 2 | ELISPOT | IFNg release | Positive     | 0 | 1 | 0 | 0 | 1 | 0 |
| 539474  | KIVRMMEYQLAVTI     | NS2a | 1262 | 1276 | HLA-DRB1*13:01            | 81% <100% | Dengue virus 2 | ELISPOT | IFNg release | Positive     | 0 | 0 | 0 | 0 | 0 | 0 |
| 539540  | LALLAAFRVPTFAA     | NS2a | 1202 | 1216 | HLA-DRB1*14:04            | 81% <100% | Dengue virus 2 | ELISPOT | IFNg release | Positive     | 0 | 1 | 1 | 0 | 1 | 0 |
| 540154  | YLALLAAFRVPTFA     | NS2a | 1201 | 1215 | HLA-DRB1*14:04            | 81% <100% | Dengue virus 2 | ELISPOT | IFNg release | Positive     | 0 | 1 | 1 | 0 | 1 | 0 |
| 865978  | GMLVLEMLRVNGS      | NS2a | 1141 | 1155 | HLA-DQA1*01:02/DOB1*05:01 | 81% <100% | Dengue virus 2 | ELISPOT | IFNg release | Positive     | 0 | 1 | 1 | 0 | 1 | 0 |
| 867216  | ILCPVNAVILQNAWK    | NS2a | 1279 | 1293 | HLA-DQA1*01:02/DOB1*06:02 | 81% <100% | Dengue virus 2 | ELISPOT | IFNg release | Positive     | 0 | 1 | 1 | 0 | 1 | 0 |
| 867571  | LCVPNAVILQNAWKV    | NS2a | 1280 | 1294 | HLA-DRB4*01:01            | 81% <100% | Dengue virus 2 | ELISPOT | IFNg release | Positive     | 0 | 1 | 1 | 0 | 1 | 0 |
| 868918  | SLGVIGMALFLEML     | NS2a | 1136 | 1150 | HLA-DQA1*05:01/DOB1*02:01 | 81% <100% | Dengue virus 2 | ELISPOT | IFNg release | Positive     | 0 | 1 | 1 | 0 | 1 | 0 |
| 167732  | DQAEISGSSPLSITSEDG | NS2b | 63   | 82   | HLA-DP                    | 81% <100% | Dengue virus 2 | ELISPOT | IFNg release | Positive     | 0 | 1 | 1 | 0 | 1 | 0 |
| 195239  | EEQTLTLRTGLLV      | NS2b | 91   | 105  | HLA-DRB1*15:01            | 81% <100% | Dengue virus 2 | ELISPOT | IFNg release | Positive     | 0 | 1 | 1 | 0 | 1 | 0 |
| 195723  | LTLRTGLLVISGL      | NS2b | 1440 | 1454 | HLA-DRB1*15:06            | 81% <100% | Dengue virus 2 | ELISPOT | IFNg release | Positive     | 0 | 1 | 1 | 0 | 1 | 0 |
| 195869  | QTLTLRTGLLVIS      | NS2b | 1438 | 1452 | HLA-DRB1*15:01            | 81% <100% | Dengue virus 2 | ELISPOT | IFNg release | Positive     | 0 | 1 | 1 | 0 | 1 | 0 |
| 139762  | GLPIRYQTPAIRAEH    | NS3  | 1712 | 1726 | HLA-DRB1*04:03            | 81% <100% | Dengue virus 2 | ELISPOT | IFNg release | Positive     | 0 | 1 | 1 | 0 | 1 | 0 |
| 180807  | VTDFKGVTVFVPSI     | NS3  | 1826 | 1840 | HLA class II              | 81% <100% | Dengue virus 2 | ELISPOT | IFNg release | Positive-Low | 0 | 1 | 1 | 0 | 1 | 0 |
| 195154  | ALRGILPRYQTPAIR    | NS3  | 1709 | 1723 | HLA-DRB1*08:02            | 81% <100% | Dengue virus 2 | ELISPOT | IFNg release | Positive     | 0 | 1 | 1 | 0 | 1 | 0 |
| 195564  | KGVVGLVGVNGVTR     | NS3  | 1618 | 1632 | HLA-DRB1*15:01            | 81% <100% | Dengue virus 2 | ELISPOT | IFNg release | Positive     | 0 | 1 | 1 | 0 | 1 | 0 |
| 195765  | MRLSPVRVFNLLI      | NS3  | 1742 | 1756 | HLA-DRB1*13:01            | 81% <100% | Dengue virus 2 | ELISPOT | IFNg release | Positive     | 0 | 1 | 1 | 0 | 1 | 0 |
| 31722   | KKVIQLSRKRTDSEY    | NS3  | 1855 | 1869 | HLA-DRB1*12:02            | 81% <100% | Dengue virus 2 | ELISPOT | IFNg release | Positive     | 0 | 1 | 1 | 0 | 1 | 0 |
| 391013  | LBGLPIRYQTPAIRA    | NS3  | 1696 | 1710 | HLA-DRB1*14:02            | 81% <100% | Dengue virus 2 | ELISPOT | IFNg release | Positive     | 0 | 1 | 1 | 0 | 1 | 0 |
| 4152    | ARGLPIRYQTPAIRA    | NS3  | 1757 | 1771 | HLA-DRB1*04:07            | 81% <100% | Dengue virus 2 | ELISPOT | IFNg release | Positive     | 0 | 1 | 1 | 0 | 1 | 0 |
| 539203  | EEVRLAGPMVPTHS     | NS3  | 1899 | 1913 | HLA-DRB1*09:01            | 81% <100% | Dengue virus 2 | ELISPOT | IFNg release | Positive     | 0 | 1 | 1 | 0 | 1 | 0 |
| 539467  | KGKTVFVPSIKAGN     | NS3  | 1830 | 1844 | HLA-DRB1*08:03            | 81% <100% | Dengue virus 2 | ELISPOT | IFNg release | Positive     | 0 | 1 | 1 | 0 | 1 | 0 |
| 539713  | NKKKVIQLSRKTDSD    | NS3  | 1853 | 1867 | HLA-DRB1*12:02            | 81% <100% | Dengue virus 2 | ELISPOT | IFNg release | Positive     | 0 | 1 | 1 | 0 | 1 | 0 |
| 539850  | RGLPIRYQTPAIRAE    | NS3  | 1711 | 1725 | HLA-DRB1*13:01            | 81% <100% | Dengue virus 2 | ELISPOT | IFNg release | Positive     | 0 | 1 | 1 | 0 | 1 | 0 |
| 539857  | RKNGKKVILSKRTKF    | NS3  | 1851 | 1865 | HLA-DRB1*08:03            | 81% <100% | Dengue virus 2 | ELISPOT | IFNg release | Positive     | 0 | 1 | 1 | 0 | 1 | 0 |
| 868724  | RTNDWDFVVTDOISE    | NS3  | 1873 | 1887 | HLA-DQA1*03:01/DOB1*03:02 | 81% <100% | Dengue virus 2 | ELISPOT | IFNg release | Positive     | 0 | 1 | 1 | 0 | 1 | 0 |
| 8911    | DKKGVGLVGVNGVV     | NS3  | 141  | 155  | HLA-DRB1*15:01            | 81% <100% | Dengue virus 2 | ICS     | IFNg release | Positive     | 0 | 1 | 1 | 0 | 1 | 0 |
| 195355  | GGIFLFLMSGKGIGK    | NS4a | 2145 | 2159 | HLA-DRB1*11:01            | 81% <100% | Dengue virus 2 | ELISPOT | IFNg release | Positive     | 0 | 0 | 0 | 0 | 0 | 0 |
| 195414  | GRAYHNLSELPETL     | NS4a | 2131 | 2145 | HLA-DRB1*04:01            | 81% <100% | Dengue virus 2 | ELISPOT | IFNg release | Positive     | 0 | 1 | 1 | 0 | 1 | 0 |
| 195635  | LGMCCITASILLWY     | NS4a | 2176 | 2190 | HLA-DRB1*07:01            | 81% <100% | Dengue virus 2 | ELISPOT | IFNg release | Positive     | 0 | 1 | 1 | 0 | 1 | 0 |
| 196089  | TVTGCCIFLFLMSGK    | NS4a | 2142 | 2156 | HLA-DRB1*11:01            | 81% <100% | Dengue virus 2 | ELISPOT | IFNg release | Positive     | 0 | 0 | 0 | 0 | 0 | 0 |
| 539609  | LPTFMTCQARNALDN    | NS4a | 2092 | 2106 | HLA-DRB1*10:01            | 81% <100% | Dengue virus 2 | ELISPOT | IFNg release | Positive     | 0 | 0 | 0 | 0 | 0 | 0 |
| 539801  | QDNCLTIVVAILLV     | NS4a | 2223 | 2237 | HLA-DRB1*15:02            | 81% <100% | Dengue virus 2 | ELISPOT | IFNg release | Positive     | 0 | 1 | 1 | 0 | 1 | 0 |
| 539804  | QDQPLVAVSILFL      | NS4a | 2152 | 2206 | HLA-DRB1*13:01            | 81% <100% | Dengue virus 2 | ELISPOT | IFNg release | Positive     | 0 | 1 | 1 | 0 | 1 | 0 |
| 540154  | YKQVQVILVAVSILFL   | NS4a | 2176 | 2190 | HLA-DRB1*13:01            | 81% <100% | Dengue virus 2 | ELISPOT | IFNg release | Positive     | 0 | 1 | 1 | 0 | 1 | 0 |
| 150611  | TAALLVAHYAYI       | NS4b | 2351 | 2365 | HLA-DRB1*01:01            | 81% <100% | Dengue virus 2 | ELISPOT | IFNg release | Positive     | 0 | 1 | 1 | 0 | 0 | 0 |
| 150636  | TLTAALLVAHYAYI     | NS4b | 2335 | 2349 | HLA-DRB1*01:01            | 81% <100% | Dengue virus 2 | ELISPOT | IFNg release | Positive     | 0 | 1 | 1 | 0 | 0 | 0 |
| 195115  | AGAGLLFSIMKNTTN    | NS4b | 2474 | 2488 | HLA-DRB1*11:01            | 81% <100% | Dengue virus 2 | ELISPOT | IFNg release | Positive     | 0 | 1 | 1 | 0 | 1 | 0 |
| 195347  | GAGLLFSIMKNTTNT    | NS4b | 2475 | 2489 | HLA-DRB1*11:01            | 81% <100% | Dengue virus 2 | ELISPOT | IFNg release | Positive     | 0 | 1 | 1 | 0 | 1 | 0 |
| 195621  | LCVQVLMNRRTTVAL    | NS4b | 2405 | 2419 | HLA-DRB1*07:01            | 81% <100% | Dengue virus 2 | ELISPOT | IFNg release | Positive     | 0 | 1 | 1 | 0 | 1 | 0 |
| 195629  | LFSIMKNTTNTRGT     | NS4b | 2479 | 2493 | HLA-DRB1*03:01            | 81% <100% | Dengue virus 2 | ELISPOT | IFNg release | Positive     | 0 | 1 | 1 | 0 | 1 | 0 |
| 195658  | LFSIMKNTTNTRRG     | NS4b | 2478 | 2492 | HLA-DRB1*04:01            | 81% <100% | Dengue virus 2 | ELISPOT | IFNg release | Positive     | 0 | 1 | 1 | 0 | 1 | 0 |
| 195827  | PESNLDLDRPASA      | NS4b | 2266 | 2280 | HLA-DRB1*03:01            | 81% <100% | Dengue virus 2 | ELISPOT | IFNg release | Positive     | 0 | 1 | 1 | 0 | 1 | 0 |
| 195980  | SQVNPITLTAALLL     | NS4b | 2343 | 2357 | HLA-DQA1*01:02/DOB1*06:02 | 81% <100% | Dengue virus 2 | ELISPOT | IFNg release | Positive     | 0 | 1 | 0 | 0 | 0 | 0 |
| 539327  | GLFSIMKNTTNTRR     | NS4b | 2477 | 2491 | HLA-DRB1*14:02            | 81% <100% | Dengue virus 2 | ELISPOT | IFNg release | Positive     | 0 | 1 | 1 | 0 | 1 | 0 |
| 867860  | LLVLCVTQVLMMKRT    | NS4b | 2416 | 2430 | HLA-CPB1*04:02            | 81% <100% | Dengue virus 2 | ELISPOT | IFNg release | Positive     | 0 | 1 | 1 | 0 | 1 | 0 |
| 1066545 | ACLCKSYAQMWSLMY    | NS5  | 3243 | 3257 | HLA-DRB1*04:01            | 81% <100% | Dengue virus 2 | ELISPOT | IFNg release | Positive-Low | 0 | 1 | 1 | 0 | 1 | 0 |
| 195957  | SRAWYMWLGARFLF     | NS5  | 2962 | 2976 | HLA-DRB1*01:01            | 81% <100% | Dengue virus 2 | ELISPOT | IFNg release | Positive     | 0 | 1 | 1 | 0 | 1 | 0 |
| 180139  | KSYAQMWSLMYFHR     | NS5  | 3247 | 3261 | HLA-DRB5*01:01            | 81% <100% | Dengue virus 2 | ELISPOT | IFNg release | Positive     | 0 | 1 | 1 | 0 | 1 | 0 |
| 180582  | KTYWYHLYGSEYTKQ    | NS5  | 2792 | 2806 | HLA class II              | 81% <100% | Dengue virus 2 | ICS     | IFNg release | Positive     | 0 | 1 | 1 | 0 | 1 | 0 |
| 195251  | ELIMQDGRVLVPCR     | NS5  | 3206 | 3220 | HLA-DRB1*03:01            | 81% <100% | Dengue virus 2 | ELISPOT | IFNg release | Positive     | 0 | 1 | 1 | 0 | 1 | 0 |
| 195380  | KGKSYAQMWSLMYFHR   | NS5  | 3232 | 3246 | HLA-DRB1*04:01            | 81% <100% | Dengue virus 2 | ELISPOT | IFNg release | Positive     | 0 | 1 | 1 | 0 | 1 | 0 |
| 195428  | GTYMDISRRSDQRGS    | NS5  | 3078 | 3092 | HLA-DRB1*03:01            | 81% <100% | Dengue virus 2 | ELISPOT | IFNg release | Positive     | 0 | 1 | 1 | 0 | 1 | 0 |
| 195801  | NMISRLINRFTMRH     | NS5  | 6    | 20   | HLA-DRB1*08:02            | 81% <100% | Dengue virus 2 | ELISPOT | IFNg release | Positive     | 0 | 1 | 1 | 0 | 0 | 0 |
| 196161  | VNMISRLINRFTMR     | NS5  | 2723 | 2737 | HLA-DRB1*10:01            | 81% <100% | Dengue virus 2 | ELISPOT | IFNg release | Positive     | 0 | 1 | 1 | 0 | 1 | 0 |
| 196223  | WLSMYHRRDLRLAA     | NS5  | 3253 | 3267 | HLA-DRB1*03:01            | 81% <100% | Dengue virus 2 | ELISPOT | IFNg release | Positive     | 0 | 1 | 1 | 0 | 1 | 0 |
| 196243  | YQMKVVRVQRPTRG     | NS5  | 3064 | 3078 | HLA-DRB1*08:02            | 81% <100% | Dengue virus 2 | ELISPOT | IFNg release | Positive     | 0 | 1 | 1 | 0 | 1 | 0 |
| 539144  | CVVKPLDDRFASALTAL  | NS5  | 3156 | 3172 | HLA class II              | 81% <100% | Dengue virus 2 | ICS     | IFNg release | Positive     | 0 | 1 | 1 | 0 | 1 | 0 |
| 539150  | DDRFASALTALNDMG    | NS5  | 3162 | 3176 | HLA-DRB1*04:03            | 81% <100% | Dengue virus 2 | ELISPOT | IFNg release | Positive     | 0 | 1 | 1 | 0 | 1 | 0 |
| 539195  | EAFKTLTYQNKVVRV    | NS5  | 3057 | 3071 | HLA-DRB1*09:01            | 81% <100% | Dengue virus 2 | ELISPOT | IFNg release | Positive     | 0 | 1 | 1 | 0 | 1 | 0 |
| 539438  | ISRLINRFTMRHKK     | NS5  | 8    | 22   | HLA-DRB1*14:02            | 81% <100% | Dengue virus 2 | ELISPOT | IFNg release | Positive     | 0 | 1 | 1 | 0 | 0 | 0 |
| 539599  | LMFYHRRDLRLAANA    | NS5  | 3255 | 3269 | HLA-DRB1*13:01            | 81% <100% | Dengue virus 2 | ELISPOT | IFNg release | Positive     | 0 | 1 | 1 | 0 | 1 | 0 |
| 539669  | MISRLINRFTMRHK     | NS5  | 2812 | 2826 | HLA-DRB1*14:06            | 81% <100% | Dengue virus 2 | ELISPOT | IFNg release | Positive     | 0 | 1 | 1 | 0 | 0 | 0 |
| 540064  | IGRMILNLRNRRTA     | NS5  | 2812 | 2826 | HLA-DRB1*12:02            | 81% <100% | Dengue virus 2 | ELISPOT | IFNg release | Positive     | 0 | 0 | 0 | 0 | 0 | 0 |
| 738754  | EETRVKRSMAALGA     | NS5  | 2874 | 2888 | HLA-DRB1*11:04            | 81% <100% | Dengue virus 2 | ELISPOT | IFNg release | Positive     | 0 | 1 | 1 | 0 | 0 | 0 |
| 739166  | IFKLTQYMKVVRVQR    | NS5  | 3045 | 3059 | HLA-DRB1*14:06            | 81% <100% | Dengue virus 2 | ELISPOT | IFNg release | Positive     | 0 | 1 | 1 | 0 | 1 | 0 |
| 739791  | NLVRLOQSGVDVFETP   | NS5  | 2599 | 2613 | HLA-DRB1*01:02            | 81% <100% | Dengue virus 2 | ELISPOT | IFNg release | Positive     | 0 | 0 | 0 | 1 | 0 | 0 |
| 740675  | VRSNAALGAFTDND     | NS5  | 2880 | 2894 | HLA-DRB1*11:04            | 81% <100% | Dengue virus 2 | ELISPOT | IFNg release | Positive     | 0 | 1 | 1 | 0 | 1 | 0 |
| 866015  | AIWYMWLGARFLFLE    | NS5  | 2964 | 2978 | HLA-CPB1*01:01            | 81% <100% | Dengue virus 2 | ELISPOT | IFNg release | Positive     | 0 | 1 | 1 | 0 | 1 | 0 |
| 866566  | EHKKLAEAFILTYQ     | NS5  | 3051 | 3065 | HLA-CPB1*01:01            | 81% <100% | Dengue virus 2 | ELISPOT | IFNg release | Positive     | 0 | 1 | 1 | 0 | 1 | 0 |
| 867419  | KHLAEAFILTYQNK     | NS5  | 3053 | 3067 | HLA-CPB1*02:01            | 81% <100% | Dengue virus 2 | ELISPOT | IFNg release | Positive     | 0 | 1 | 1 | 0 | 1 | 0 |
| 867433  | KLAEAFILTYQNKV     | NS5  | 3054 | 3068 | HLA-CPB1*02:01            | 81% <100% | Dengue virus 2 | ELISPOT | IFNg release | Positive     | 0 | 1 | 1 | 0 | 1 | 0 |
| 867514  | KTPVSWEEIPLYGK     | NS5  | 3318 | 3332 | HLA-DQA1*01:01/DOB1*05:01 | 81% <100% | Dengue virus 2 | ELISPOT | IFNg release | Positive     | 0 | 1 | 1 | 0 | 1 | 0 |
| 868668  | RKVRNSAALGAFTD     | NS5  | 2892 | 2906 | HLA-DRB3*02:02            | 81% <100% | Dengue virus 2 | ELISPOT | IFNg release | Positive     | 0 | 1 | 1 | 0 | 1 | 0 |
| 869082  | SYAQMWSLMYFHRD     | NS5  | 3248 | 3262 | HLA-CPB1*04:01            | 81% <100% | Dengue virus 2 | ELISPOT | IFNg release | Positive     | 0 | 1 | 1 | 0 | 1 | 0 |
| 869307  | TRKVRNSAALGAFT     | NS5  | 2891 | 2905 | HLA-DRB3*02:02            | 81% <100% | Dengue virus 2 | ELISPOT | IFNg release | Positive     | 0 | 1 | 1 | 0 | 1 | 0 |
| 195417  | GRMLNLRNRRTAG      | C    | 89   | 103  | HLA-DRB1*11:01            | 51%-80%   | Dengue virus 2 | ELISPOT | IFNg release | Positive     | 0 | 0 | 1 | 0 | 0 | 0 |
| 195489  | IGRMILNLRNRRTA     | C    | 88   | 102  | HLA-DRB1*11:02            | 51%-80%   | Dengue virus 2 | ELISPOT | IFNg release | Positive     | 0 | 1 | 1 | 0 | 0 | 0 |
| 195899  | RMLNLRNRRTAGV      | C    | 71   | 85   | HLA-DRB1*08:02            | 51%-80%   | Dengue virus 2 | ELISPOT | IFNg release | Positive     | 0 | 1 | 1 | 0 | 0 | 0 |
| 196133  | VKLITMDTGKGMQ      | NS1  | 84   | 98   | HLA-DRB1*03:              |           |                |         |              |              |   |   |   |   |   |   |



|        |                 |     |      |      |                |           |                |         |                      |          |   |   |   |   |   |   |
|--------|-----------------|-----|------|------|----------------|-----------|----------------|---------|----------------------|----------|---|---|---|---|---|---|
| 32943  | KPWDVVPV        | N55 | 2821 | 2829 | HLA class II   | >0% - 50% | Dengue virus 2 | ELISA   | IL-2 release         | Positive | 0 | 1 | 1 | 0 | 1 | 0 |
| 539603 | LNTFTNMEQLIRQM  | N55 | 3100 | 3114 | HLA-DRB1*10:01 | >0% - 50% | Dengue virus 2 | ELISPOT | IFN $\gamma$ release | Positive | 0 | 1 | 1 | 0 | 1 | 0 |
| 539668 | MISRMLINRFTMKHK | N55 | 2725 | 2739 | HLA-DRB1*14:04 | >0% - 50% | Dengue virus 2 | ELISPOT | IFN $\gamma$ release | Positive | 0 | 0 | 0 | 0 | 0 | 0 |
| 539932 | SRMLINRFTMKHKA  | N55 | 2727 | 2741 | HLA-DRB1*08:03 | >0% - 50% | Dengue virus 2 | ELISPOT | IFN $\gamma$ release | Positive | 0 | 0 | 0 | 0 | 0 | 0 |
| 540065 | VNGVVRLLTKPWDV  | N55 | 2812 | 2826 | HLA-DRB1*12:02 | >0% - 50% | Dengue virus 2 | ELISPOT | IFN $\gamma$ release | Positive | 0 | 1 | 1 | 0 | 1 | 0 |
| 540066 | VNMISRMLINRFTMK | N55 | 2723 | 2737 | HLA-DRB1*12:02 | >0% - 50% | Dengue virus 2 | ELISPOT | IFN $\gamma$ release | Positive | 0 | 0 | 0 | 0 | 0 | 0 |
| 866648 | ETCVYNMGMGKREKL | N55 | 2939 | 2953 | HLA-DRB5*01:01 | >0% - 50% | Dengue virus 2 | ELISPOT | IFN $\gamma$ release | Positive | 0 | 1 | 1 | 0 | 1 | 0 |



## CD4 DENV-3 Epitopes

| Epitope_ID | AA_Seq           | Protein_Name | Start | End  | Allele                    | Step | Serotype       | Method/Technique | Assay_Group  | Qualitative_Measure | DENV-3 constructs of vaccines (100% identity=1, green ; else 0, red) |      |      |           |        |      |
|------------|------------------|--------------|-------|------|---------------------------|------|----------------|------------------|--------------|---------------------|----------------------------------------------------------------------|------|------|-----------|--------|------|
|            |                  |              |       |      |                           |      |                |                  |              |                     | TV003                                                                | TDEN | DPV1 | Dengvaxia | DENVax | TVDV |
| 195205     | CLMMMLPATLAFHLT  | C            | 104   | 118  | HLA-DRB1*15:01            | 0%   | Dengue virus 3 | ELISPOT          | IFNg release | Positive            | 1                                                                    | 1    | 1    | 0         | 0      | 0    |
| 195289     | FLCMMMLPATLAFHL  | C            | 103   | 117  | HLA-DRB1*01:01            | 0%   | Dengue virus 3 | ELISPOT          | IFNg release | Positive            | 0                                                                    | 0    | 0    | 0         | 0      | 0    |
| 195517     | INMLKRVNRNVSTGP  | C            | 13    | 27   | HLA-DRB1*08:02            | 0%   | Dengue virus 3 | ELISPOT          | IFNg release | Positive            | 0                                                                    | 0    | 0    | 0         | 0      | 0    |
| 195519     | INMLKRVNRNVSTGT  | C            | 13    | 27   | HLA-DRB1*08:02            | 0%   | Dengue virus 3 | ELISPOT          | IFNg release | Positive            | 0                                                                    | 0    | 0    | 0         | 0      | 0    |
| 195598     | KTSLCLMMLPAALA   | C            | 100   | 114  | HLA-DRB1*01:01            | 0%   | Dengue virus 3 | ELISPOT          | IFNg release | Positive            | 0                                                                    | 0    | 0    | 0         | 0      | 0    |
| 195618     | LCLMMLMPAALFHL   | C            | 103   | 117  | HLA-DRB1*01:01            | 0%   | Dengue virus 3 | ELISPOT          | IFNg release | Positive            | 0                                                                    | 0    | 0    | 0         | 0      | 0    |
| 195803     | NMLKRVNRNVSTGPO  | C            | 14    | 28   | HLA-DRB1*11:01            | 0%   | Dengue virus 3 | ELISPOT          | IFNg release | Positive            | 0                                                                    | 0    | 0    | 0         | 0      | 0    |
| 195966     | SLCLMMLPAALAH    | C            | 102   | 116  | HLA-DRB1*08:02            | 0%   | Dengue virus 3 | ELISPOT          | IFNg release | Positive            | 0                                                                    | 0    | 0    | 0         | 0      | 0    |
| 195967     | SLCLMMLPATLAH    | C            | 102   | 116  | HLA-DRB1*08:02            | 0%   | Dengue virus 3 | ELISPOT          | IFNg release | Positive            | 1                                                                    | 1    | 1    | 0         | 0      | 0    |
| 539447     | YNRRKRTSLCLMM    | C            | 94    | 108  | HLA-DRB1*13:01            | 0%   | Dengue virus 3 | ELISPOT          | IFNg release | Positive            | 0                                                                    | 0    | 0    | 0         | 0      | 0    |
| 539906     | SINRRKRTSLCLMM   | C            | 93    | 107  | HLA-DRB1*13:01            | 0%   | Dengue virus 3 | ELISPOT          | IFNg release | Positive            | 0                                                                    | 0    | 0    | 0         | 0      | 0    |
| 540118     | WGSFKKSGAVKVLRG  | C            | 69    | 83   | HLA-DRB1*09:01            | 0%   | Dengue virus 3 | ELISPOT          | IFNg release | Positive            | 0                                                                    | 0    | 0    | 0         | 0      | 0    |
| 540119     | WGTFKSGAIVKVLK   | C            | 69    | 83   | HLA-DRB1*09:01            | 0%   | Dengue virus 3 | ELISPOT          | IFNg release | Positive            | 0                                                                    | 0    | 0    | 0         | 0      | 0    |
| 540120     | WGTFKKGAIKVLKRG  | C            | 69    | 83   | HLA-DRB1*09:01            | 0%   | Dengue virus 3 | ELISPOT          | IFNg release | Positive            | 0                                                                    | 0    | 0    | 0         | 0      | 0    |
| 540122     | WGTFKSGAIVKVLK   | C            | 69    | 83   | HLA-DRB1*09:01            | 0%   | Dengue virus 3 | ELISPOT          | IFNg release | Positive            | 0                                                                    | 0    | 0    | 0         | 0      | 0    |
| 540123     | WGTFKSGAIVKVLK   | C            | 69    | 83   | HLA-DRB1*09:01            | 0%   | Dengue virus 3 | ELISPOT          | IFNg release | Positive            | 1                                                                    | 0    | 1    | 0         | 0      | 0    |
| 540124     | WGTFKSGAIVKVLK   | C            | 69    | 83   | HLA-DRB1*09:01            | 0%   | Dengue virus 3 | ELISPOT          | IFNg release | Positive            | 0                                                                    | 0    | 0    | 0         | 0      | 0    |
| 591709     | LRGFKKEISNMLSI   | C            | 81    | 95   | HLA-DRB1*13:02            | 0%   | Dengue virus 3 | ELISPOT          | IFNg release | Positive            | 1                                                                    | 0    | 1    | 0         | 0      | 0    |
| 591746     | RGFKKEISNMLSI    | C            | 82    | 96   | HLA-DRB1*04:01            | 0%   | Dengue virus 3 | ELISPOT          | IFNg release | Positive            | 1                                                                    | 0    | 1    | 0         | 0      | 0    |
| 867744     | LKSFKEISNMLSI    | C            | 81    | 95   | HLA-DRB3*02:02            | 0%   | Dengue virus 3 | ELISPOT          | IFNg release | Positive            | 0                                                                    | 0    | 0    | 0         | 0      | 0    |
| 867909     | LRGFKREISNMLSI   | C            | 64    | 78   | HLA-DRB3*02:02            | 0%   | Dengue virus 3 | ELISPOT          | IFNg release | Positive            | 0                                                                    | 0    | 0    | 0         | 0      | 0    |
| 868733     | RWGTKKSGAIVKVLK  | C            | 48    | 62   | HLA-DRB3*02:02            | 0%   | Dengue virus 3 | ELISPOT          | IFNg release | Positive            | 1                                                                    | 0    | 1    | 0         | 0      | 0    |
| 195968     | SLQVIFVILLMLV    | PreM         | 261   | 275  | HLA-DRB1*15:06            | 0%   | Dengue virus 3 | ELISPOT          | IFNg release | Positive            | 0                                                                    | 0    | 0    | 0         | 0      | 0    |
| 195607     | YQVHNFVILLMLVTP  | PreM         | 261   | 275  | HLA-DRB1*15:06            | 0%   | Dengue virus 3 | ELISPOT          | IFNg release | Positive            | 0                                                                    | 0    | 0    | 0         | 0      | 0    |
| 539529     | KVIFVILLVTPSM    | PreM         | 265   | 279  | HLA-DRB1*15:06            | 0%   | Dengue virus 3 | ELISPOT          | IFNg release | Positive            | 0                                                                    | 1    | 0    | 0         | 0      | 0    |
| 539808     | QGVIFVILLVTPS    | PreM         | 264   | 278  | HLA-DRB1*15:06            | 0%   | Dengue virus 3 | ELISPOT          | IFNg release | Positive            | 0                                                                    | 0    | 0    | 0         | 0      | 0    |
| 196170     | YQVHNFVILLVTPH   | E            | 130   | 144  | HLA-DRB1*07:01            | 0%   | Dengue virus 3 | ELISPOT          | IFNg release | Positive            | 1                                                                    | 1    | 1    | 1         | 1      | 1    |
| 539476     | KKELLYTKNAHAHK   | E            | 511   | 525  | HLA-DRB1*14:04            | 0%   | Dengue virus 3 | ELISPOT          | IFNg release | Positive            | 1                                                                    | 0    | 1    | 0         | 0      | 0    |
| 539856     | REKLLTYTKNAHAHK  | E            | 511   | 525  | HLA-DRB1*04:03            | 0%   | Dengue virus 3 | ELISPOT          | IFNg release | Positive            | 0                                                                    | 0    | 0    | 0         | 0      | 0    |
| 591605     | APFKVESETQHG     | E            | 303   | 317  | HLA-DRB1*04:01            | 0%   | Dengue virus 3 | ELISPOT          | IFNg release | Positive            | 1                                                                    | 0    | 1    | 0         | 0      | 0    |
| 591719     | NEMILLTMKNRAWMV  | E            | 474   | 488  | HLA-DRB1*11:01            | 0%   | Dengue virus 3 | ELISPOT          | IFNg release | Positive            | 0                                                                    | 0    | 0    | 0         | 0      | 0    |
| 867374     | KAWIVHROGFDLPL   | E            | 482   | 496  | HLA-DQA1*01:01/DOB1*05:01 | 0%   | Dengue virus 3 | ELISPOT          | IFNg release | Positive            | 0                                                                    | 0    | 0    | 0         | 0      | 0    |
| 869693     | WMVHROGFDLPLPW   | E            | 87    | 101  | HLA-DQA1*01:01/DOB1*05:01 | 0%   | Dengue virus 3 | ELISPOT          | IFNg release | Positive            | 0                                                                    | 0    | 0    | 0         | 0      | 0    |
| 539070     | AKIVTAETRNSSFI   | NS1          | 121   | 135  | HLA-DRB1*13:01            | 0%   | Dengue virus 3 | ELISPOT          | IFNg release | Positive            | 0                                                                    | 0    | 0    | 0         | 0      | 0    |
| 539457     | KAKIVTAETRNSSFI  | NS1          | 893   | 907  | HLA-DRB1*13:01            | 0%   | Dengue virus 3 | ELISPOT          | IFNg release | Positive            | 0                                                                    | 0    | 0    | 0         | 0      | 0    |
| 866698     | FGVTFNMLKLRDV    | NS1          | 933   | 947  | HLA-DPB1*04:01            | 0%   | Dengue virus 3 | ELISPOT          | IFNg release | Positive            | 0                                                                    | 0    | 0    | 0         | 0      | 0    |
| 195128     | AGVTFMFLVLLSGQI  | NS2a         | 1159  | 1173 | HLA-DRB1*07:01            | 0%   | Dengue virus 3 | ELISPOT          | IFNg release | Positive            | 0                                                                    | 0    | 0    | 0         | 0      | 0    |
| 195133     | AHTLMIGNSASDRM   | NS2a         | 1179  | 1193 | HLA-DRB1*04:01            | 0%   | Dengue virus 3 | ELISPOT          | IFNg release | Positive            | 0                                                                    | 0    | 0    | 0         | 0      | 0    |
| 195166     | ANTLMIGNSASDRM   | NS2a         | 1179  | 1193 | HLA-DRB1*04:01            | 0%   | Dengue virus 3 | ELISPOT          | IFNg release | Positive            | 0                                                                    | 0    | 0    | 0         | 0      | 0    |
| 195433     | GVLTFLVLLSGQIT   | NS2a         | 1160  | 1174 | HLA-DRB1*15:06            | 0%   | Dengue virus 3 | ELISPOT          | IFNg release | Positive            | 1                                                                    | 0    | 1    | 0         | 0      | 0    |
| 195456     | HMIAGILFMVLLLS   | NS2a         | 1156  | 1170 | HLA-DRB1*11:01            | 0%   | Dengue virus 3 | ELISPOT          | IFNg release | Positive            | 0                                                                    | 0    | 0    | 0         | 0      | 0    |
| 195630     | LFTFLVLLSGQITWR  | NS2a         | 1162  | 1176 | HLA-DRB1*07:01            | 0%   | Dengue virus 3 | ELISPOT          | IFNg release | Positive            | 1                                                                    | 0    | 1    | 0         | 0      | 0    |
| 195734     | LVSLTSNTLLTLTV   | NS2a         | 1274  | 1288 | HLA-DRB1*07:01            | 0%   | Dengue virus 3 | ELISPOT          | IFNg release | Positive            | 0                                                                    | 0    | 0    | 0         | 0      | 0    |
| 196123     | VGVLFVLLVLLSGQI  | NS2a         | 1159  | 1173 | HLA-DRB1*07:01            | 0%   | Dengue virus 3 | ELISPOT          | IFNg release | Positive            | 0                                                                    | 0    | 0    | 0         | 0      | 0    |
| 540048     | VLFVLLVLLSGQITW  | NS2a         | 1161  | 1175 | HLA-DRB1*09:01            | 0%   | Dengue virus 3 | ELISPOT          | IFNg release | Positive            | 1                                                                    | 0    | 1    | 0         | 0      | 0    |
| 865959     | AGALFVLLVLLSGQI  | NS2a         | 1159  | 1173 | HLA-DRB1*04:02            | 0%   | Dengue virus 3 | ELISPOT          | IFNg release | Positive            | 0                                                                    | 0    | 0    | 0         | 0      | 0    |
| 867702     | LIATFQKQPLTLG    | NS2a         | 1202  | 1216 | HLA-DPB1*01:01            | 0%   | Dengue virus 3 | ELISPOT          | IFNg release | Positive            | 0                                                                    | 0    | 0    | 0         | 0      | 0    |
| 869592     | VQPFALGFFRLKLT   | NS2a         | 1208  | 1222 | HLA-DPB1*01:01            | 0%   | Dengue virus 3 | ELISPOT          | IFNg release | Positive            | 0                                                                    | 0    | 0    | 0         | 0      | 0    |
| 739173     | IGLVSLASSLRND    | NS2b         | 1354  | 1368 | HLA-DRB1*11:04            | 0%   | Dengue virus 3 | ELISPOT          | IFNg release | Positive            | 0                                                                    | 0    | 0    | 0         | 0      | 0    |
| 195297     | FHTMWVHTRGAVLT   | NS3          | 1519  | 1533 | HLA-DRB1*07:01            | 0%   | Dengue virus 3 | ELISPOT          | IFNg release | Positive            | 0                                                                    | 0    | 0    | 0         | 0      | 0    |
| 21420      | GNWETDVFVGKTVWF  | NS3          | 31    | 45   | HLA-DRB1*15:01            | 0%   | Dengue virus 3 | ICS              | IFNg release | Positive            | 0                                                                    | 1    | 0    | 0         | 0      | 0    |
| 49767      | PTRVAADEMEAMKG   | NS3          | 1697  | 1711 | HLA-DRB1*15:01            | 0%   | Dengue virus 3 | ICS              | IFNg release | Positive            | 0                                                                    | 0    | 0    | 0         | 0      | 0    |
| 539777     | PKVFCMTGPGICITTT | NS3          | 1579  | 1593 | HLA-DRB1*04:03            | 0%   | Dengue virus 3 | ELISPOT          | IFNg release | Positive            | 1                                                                    | 1    | 1    | 0         | 0      | 0    |
| 540037     | YGVTFWFPKAGN     | NS3          | 1827  | 1841 | HLA-DRB1*08:03            | 0%   | Dengue virus 3 | ELISPOT          | IFNg release | Positive            | 0                                                                    | 1    | 0    | 0         | 0      | 0    |
| 72654      | WITDFGKGTW       | NS3          | 1824  | 1838 | HLA-DRB1                  | 0%   | Dengue virus 3 | 51 chromium      | cytotoxicity | Positive            | 0                                                                    | 1    | 0    | 0         | 0      | 0    |
| 867106     | HTMWVHTRGAVLTN   | NS3          | 1520  | 1534 | HLA-DQA1*05:01/DOB1*02:01 | 0%   | Dengue virus 3 | ELISPOT          | IFNg release | Positive            | 0                                                                    | 0    | 0    | 0         | 0      | 0    |
| 869689     | WHYTRGAVLTNRYGR  | NS3          | 1523  | 1537 | HLA-DQA1*05:01/DOB1*02:01 | 0%   | Dengue virus 3 | ELISPOT          | IFNg release | Positive            | 0                                                                    | 0    | 0    | 0         | 0      | 0    |
| 195199     | AYVVIGILLTAAIV   | NS4a         | 2227  | 2241 | HLA-DRB1*01:01            | 0%   | Dengue virus 3 | ELISPOT          | IFNg release | Positive            | 1                                                                    | 1    | 1    | 0         | 0      | 0    |
| 195742     | MAADVPLQWIASAIVL | NS4a         | 2189  | 2203 | HLA-DRB1*07:01            | 0%   | Dengue virus 3 | ELISPOT          | IFNg release | Positive            | 1                                                                    | 1    | 1    | 0         | 0      | 0    |
| 539900     | SGMLVMAADVPLQWIA | NS4a         | 2184  | 2198 | HLA-DRB1*04:03            | 0%   | Dengue virus 3 | ELISPOT          | IFNg release | Positive            | 1                                                                    | 1    | 1    | 0         | 0      | 0    |
| 739020     | GIGKTSIGKICVIVS  | NS4a         | 2169  | 2183 | HLA-DRB1*11:04            | 0%   | Dengue virus 3 | ELISPOT          | IFNg release | Positive            | 0                                                                    | 0    | 0    | 0         | 0      | 0    |
| 867986     | LTLTAVALLLATHYA  | NS4b         | 2347  | 2361 | HLA-DQA1*01:02/DOB1*06:02 | 0%   | Dengue virus 3 | ELISPOT          | IFNg release | Positive            | 0                                                                    | 1    | 0    | 0         | 0      | 0    |
| 195408     | GNVASVNMVSRLL    | NS5          | 3     | 17   | HLA-DRB1*03:01            | 0%   | Dengue virus 3 | ELISPOT          | IFNg release | Positive            | 0                                                                    | 0    | 0    | 0         | 0      | 0    |
| 195780     | NEDHVSFSDNSVSGV  | NS5          | 2982  | 2996 | HLA-DRB1*04:01            | 0%   | Dengue virus 3 | ELISPOT          | IFNg release | Positive            | 0                                                                    | 0    | 0    | 0         | 0      | 0    |
| 196038     | TMNVASVNMVSRLL   | NS5          | 2     | 16   | HLA-DRB1*04:01            | 0%   | Dengue virus 3 | ELISPOT          | IFNg release | Positive            | 0                                                                    | 0    | 0    | 0         | 0      | 0    |
| 196221     | WLWRTGLRKNKPRLC  | NS5          | 157   | 171  | HLA-DRB1*14:02            | 0%   | Dengue virus 3 | ELISPOT          | IFNg release | Positive            | 0                                                                    | 0    | 0    | 0         | 0      | 0    |
| 32944      | KPVAAVPTV        | NS5          | 2819  | 2827 | HLA-DRB1                  | 0%   | Dengue virus 3 | ELISA            | IL-2 release | Positive            | 0                                                                    | 0    | 0    | 0         | 0      | 0    |
| 539444     | IVASVNMVSRLLNR   | NS5          | 2717  | 2731 | HLA-DRB1*12:02            | 0%   | Dengue virus 3 | ELISPOT          | IFNg release | Positive            | 1                                                                    | 1    | 1    | 0         | 0      | 0    |
| 539726     | NIVASVNMVSRLLNR  | NS5          | 2716  | 2730 | HLA-DRB1*15:06            | 0%   | Dengue virus 3 | ELISPOT          | IFNg release | Positive            | 0                                                                    | 0    | 0    | 0         | 0      | 0    |
| 539739     | NMEVQLVRQMEGEV   | NS5          | 3103  | 3117 | HLA-DRB1*13:01            | 0%   | Dengue virus 3 | ELISPOT          | IFNg release | Positive            | 0                                                                    | 0    | 0    | 0         | 0      | 0    |
| 540025     | VASVNMVSRLLNRF   | NS5          | 2718  | 2732 | HLA-DRB1*14:04            | 0%   | Dengue virus 3 | ELISPOT          | IFNg release | Positive            | 0                                                                    | 0    | 0    | 0         | 0      | 0    |
| 591602     | ACLGAAYAGQMTLTM  | NS5          | 3242  | 3256 | HLA-DRB1*04:01            | 0%   | Dengue virus 3 | ELISPOT          | IFNg release | Positive            | 1                                                                    | 0    | 1    | 0         | 0      | 0    |
| 738537     | ASVNMVSRLLNRF    | NS5          | 7     | 21   | HLA-DRB1*14:06            | 0%   | Dengue virus 3 | ELISPOT          | IFNg release | Positive            | 0                                                                    | 0    | 0    | 0         | 0      | 0    |
| 740771     | YGLNTFTNMEVQLVR  | NS5          | 3096  | 3110 | HLA-DRB1*04:07            | 0%   | Dengue virus 3 | ELISPOT          | IFNg release | Positive            | 0                                                                    | 0    | 0    | 0         | 0      | 0    |
| 195830     | PGFTILALFLAHYH   | PreM         | 245   | 259  | HLA-DRB1*15:06            | 100% | Dengue virus 3 | ELISPOT          | IFNg release | Positive            | 1                                                                    | 1    | 1    | 1         | 1      | 1    |
| 867082     | HPGFTILALFLAHYI  | PreM         | 244   | 258  | HLA-DPB1*02:01            | 100% | Dengue virus 3 | ELISPOT          | IFNg release | Positive            | 1                                                                    | 1    | 1    | 1         | 1      | 1    |
| 191314     | EGKVQYQENLYKTVI  | E            | 126   | 140  | HLA-DR2                   | 100% | Dengue virus 3 | ELISPOT          | IFNg release | Positive            | 0                                                                    | 0    | 0    | 0         | 0      | 0    |
| 191289     | NGLRLTANPVPYKKE  | E            | 626   | 640  | HLA-DRB1*08:02            | 100% | Dengue virus 3 | ELISPOT          | IFNg release | Positive            | 1                                                                    | 1    | 1    | 1         | 1      | 1    |
| 19376      | EMILLTMKNRAWMVH  | E            | 473   | 487  | HLA-DRB1*13:01            | 100% | Dengue virus 3 | ELISPOT          | IFNg release | Positive            | 1                                                                    | 1    | 1    | 1         | 0      | 1    |
| 195215     | DFNEMILLTMKNKAW  | E            | 470   | 484  | HLA-DRB1*14:04            | 100% | Dengue virus 3 | ELISPOT          | IFNg release | Positive            | 1                                                                    | 1    | 1    | 1         | 0      | 1    |
| 195341     | FVLKKEVSETQHG    | E            | 584   | 598  | HLA-DRB1*04:01            | 100% | Dengue virus 3 | ELISPOT          | IFNg release | Positive            | 1                                                                    | 1    | 1    | 1         | 1      | 1    |
| 195365     | GHLKRLMKDKLK     | E            | 550   | 572  | HLA-DRB1*03:01            | 100% | Dengue virus 3 | ELISPOT          | IFNg release | Positive            | 1                                                                    | 1    | 1    | 1         | 0      | 1    |
| 195623     | FVLKKEVSETQHG    | E            | 582   | 597  | HLA-DRB1*04:01            | 100% | Dengue virus 3 | ELISPOT          | IFNg release | Positive            | 0                                                                    | 1    | 0    | 1         | 0      | 1    |
| 196172     | YQVHNFVILLVTPH   | E            |       |      |                           |      |                |                  |              |                     |                                                                      |      |      |           |        |      |



|         |                     |      |      |      |                           |           |                |                   |                     |              |   |   |   |   |   |   |
|---------|---------------------|------|------|------|---------------------------|-----------|----------------|-------------------|---------------------|--------------|---|---|---|---|---|---|
| 28422   | IRYQTATK            | NS3  | 241  | 249  | HLA-DR15                  | 100%      | Dengue virus 3 | 51 chromium       | cytotoxicity        | Positive     | 1 | 1 | 1 | 0 | 0 | 0 |
| 45670   | NREGKVVGLYGVGV      | NS3  | 141  | 155  | HLA-DRB1*15:01            | 100%      | Dengue virus 3 | multimer/tetramer | qualitative binding | Positive     | 0 | 1 | 0 | 0 | 0 | 0 |
| 539052  | AGKTVWVPSKAGN       | NS3  | 1829 | 1843 | HLA-DRB1*08:03            | 100%      | Dengue virus 3 | ELISPOT           | IFNg release        | Positive     | 1 | 0 | 1 | 0 | 0 | 0 |
| 539278  | LKGLPRHYQTATKS      | NS3  | 1709 | 1723 | HLA-DRB1*13:01            | 100%      | Dengue virus 3 | ELISPOT           | IFNg release        | Positive     | 1 | 1 | 1 | 0 | 0 | 0 |
| 539607  | LPIRYQTATKSEHT      | NS3  | 1712 | 1726 | HLA-DRB1*13:01            | 100%      | Dengue virus 3 | ELISPOT           | IFNg release        | Positive     | 1 | 1 | 1 | 0 | 0 | 0 |
| 539844  | REGKVVGLYGVGV       | NS3  | 1615 | 1629 | HLA-DRB1*01:02            | 100%      | Dengue virus 3 | ELISPOT           | IFNg release        | Positive     | 0 | 1 | 0 | 0 | 0 | 0 |
| 539901  | TMADSPVRPNPNL       | NS3  | 1740 | 1754 | HLA-DRB1*13:01            | 100%      | Dengue virus 3 | ELISPOT           | IFNg release        | Positive     | 1 | 1 | 1 | 0 | 0 | 0 |
| 68015   | VDLMCHAITT          | NS3  | 258  | 267  | HLA-DPw2                  | 100%      | Dengue virus 3 | 51 chromium       | cytotoxicity        | Positive     | 1 | 1 | 1 | 0 | 0 | 0 |
| 866773  | FQTTTGEIGALDF       | NS3  | 1589 | 1603 | HLA-DQA1*03:01/DOB1*03:02 | 100%      | Dengue virus 3 | ELISPOT           | IFNg release        | Positive     | 1 | 1 | 1 | 0 | 0 | 0 |
| 869278  | TMWHYVTRGAVLTHNG    | NS3  | 1521 | 1535 | HLA-DQA1*05:01/DOB1*02:01 | 100%      | Dengue virus 3 | ELISPOT           | IFNg release        | Positive     | 1 | 1 | 1 | 0 | 0 | 0 |
| 167755  | IADLYDTGIRVPSHLAHT  | NS4a | 2    | 21   | HLA class II              | 100%      | Dengue virus 3 | ELISPOT           | IFNg release        | Positive     | 1 | 1 | 1 | 0 | 0 | 0 |
| 195346  | GAGLAFSVMKSGVGTG    | NS4b | 2474 | 2488 | HLA-DRB1*04:01            | 100%      | Dengue virus 3 | ELISPOT           | IFNg release        | Positive     | 1 | 1 | 1 | 0 | 0 | 0 |
| 195607  | LAFSVMKSGVGTGKRG    | NS4b | 2477 | 2491 | HLA-DRB1*04:01            | 100%      | Dengue virus 3 | ELISPOT           | IFNg release        | Positive     | 1 | 1 | 1 | 0 | 0 | 0 |
| 195617  | LCACVQLLMRTSWAL     | NS4b | 2418 | 2432 | HLA-DRB1*15:01            | 100%      | Dengue virus 3 | ELISPOT           | IFNg release        | Positive     | 0 | 1 | 0 | 0 | 0 | 0 |
| 195624  | LDPVIVDSKFKQLG      | NS4b | 2397 | 2411 | HLA-DRB1*03:01            | 100%      | Dengue virus 3 | ELISPOT           | IFNg release        | Positive     | 1 | 1 | 1 | 0 | 0 | 0 |
| 195684  | LLMRTSWALCEALT      | NS4b | 2423 | 2437 | HLA-DRB1*04:01            | 100%      | Dengue virus 3 | ELISPOT           | IFNg release        | Positive     | 0 | 1 | 0 | 0 | 0 | 0 |
| 195871  | QVNLVLCVAVQLLM      | NS4b | 2412 | 2426 | HLA-DRB1*01:01            | 100%      | Dengue virus 3 | ELISPOT           | IFNg release        | Positive     | 1 | 1 | 1 | 0 | 0 | 0 |
| 196137  | VLCVAVQLLMRTSWA     | NS4b | 2417 | 2431 | HLA-DRB1*12:02            | 100%      | Dengue virus 3 | ELISPOT           | IFNg release        | Positive     | 1 | 1 | 1 | 0 | 0 | 0 |
| 196155  | VMLVLCVAVQLLMR      | NS4b | 2413 | 2427 | HLA-DRB1*03:01            | 100%      | Dengue virus 3 | ELISPOT           | IFNg release        | Positive     | 1 | 1 | 1 | 0 | 0 | 0 |
| 738453  | AGLAFSVMKSGVGTG     | NS4b | 2475 | 2489 | HLA-DRB1*04:07            | 100%      | Dengue virus 3 | ELISPOT           | IFNg release        | Positive     | 1 | 1 | 1 | 0 | 0 | 0 |
| 868978  | SLAAAGAAVVLIMGL     | NS4b | 2306 | 2320 | HLA-DQA1*01:02/DOB1*06:02 | 100%      | Dengue virus 3 | ELISPOT           | IFNg release        | Positive     | 1 | 1 | 1 | 0 | 0 | 0 |
| 167760  | KRLNQLAFEDL         | NS5  | 15   | 27   | HLA-DP                    | 100%      | Dengue virus 3 | ELISPOT           | IFNg release        | Positive     | 0 | 1 | 0 | 0 | 0 | 0 |
| 195136  | AFIKLTQYNKVVYKV     | NS5  | 3056 | 3070 | HLA-DRB1*09:01            | 100%      | Dengue virus 3 | ELISPOT           | IFNg release        | Positive     | 1 | 1 | 1 | 0 | 0 | 0 |
| 195204  | CLGKAYQAMWMSLYMP    | NS5  | 3243 | 3257 | HLA-DRB1*04:01            | 100%      | Dengue virus 3 | ELISPOT           | IFNg release        | Positive     | 0 | 1 | 0 | 0 | 0 | 0 |
| 195273  | ETKGVRLKRMAISG      | NS5  | 3138 | 3152 | HLA-DRB1*11:01            | 100%      | Dengue virus 3 | ELISPOT           | IFNg release        | Positive     | 1 | 1 | 1 | 0 | 0 | 0 |
| 195437  | GYLRLDISKPGGAM      | NS5  | 43   | 57   | HLA-DRB1*08:02            | 100%      | Dengue virus 3 | ELISPOT           | IFNg release        | Positive     | 1 | 1 | 1 | 0 | 0 | 0 |
| 195568  | KHGGMLNRPISLRNS     | NS5  | 2689 | 2703 | HLA-DRB1*08:02            | 100%      | Dengue virus 3 | ELISPOT           | IFNg release        | Positive     | 1 | 1 | 1 | 0 | 0 | 0 |
| 195641  | LHLKGYLRDISKIP      | NS5  | 39   | 53   | HLA-DRB1*03:01            | 100%      | Dengue virus 3 | ELISPOT           | IFNg release        | Positive     | 1 | 1 | 1 | 0 | 0 | 0 |
| 196222  | WNVVKMLSGKDVLYL     | NS5  | 2611 | 2625 | HLA-DRB1*15:01            | 100%      | Dengue virus 3 | ELISPOT           | IFNg release        | Positive     | 1 | 1 | 1 | 0 | 0 | 0 |
| 196224  | WSLWVYHRRDLRLAS     | NS5  | 3252 | 3266 | HLA-DRB1*03:01            | 100%      | Dengue virus 3 | ELISPOT           | IFNg release        | Positive     | 0 | 1 | 0 | 0 | 0 | 0 |
| 539600  | LMVHFHRRDLRLASNA    | NS5  | 3254 | 3268 | HLA-DRB1*13:01            | 100%      | Dengue virus 3 | ELISPOT           | IFNg release        | Positive     | 1 | 1 | 1 | 0 | 0 | 0 |
| 539604  | LNTFTMEAQVLRQM      | NS5  | 3098 | 3112 | HLA-DRB1*10:01            | 100%      | Dengue virus 3 | ELISPOT           | IFNg release        | Positive     | 0 | 1 | 0 | 0 | 0 | 0 |
| 539704  | NAIFKLTQYNKVVKV     | NS5  | 3055 | 3069 | HLA-DRB1*09:01            | 100%      | Dengue virus 3 | ELISPOT           | IFNg release        | Positive     | 1 | 1 | 1 | 0 | 0 | 0 |
| 539872  | RDRLLASNAICSAV      | NS5  | 3259 | 3273 | HLA-DRB1*04:03            | 100%      | Dengue virus 3 | ELISPOT           | IFNg release        | Positive     | 1 | 1 | 1 | 0 | 0 | 0 |
| 539916  | SLMFFHRRDLRLASN     | NS5  | 3253 | 3267 | HLA-DRB1*13:01            | 100%      | Dengue virus 3 | ELISPOT           | IFNg release        | Positive     | 0 | 1 | 0 | 0 | 0 | 0 |
| 540019  | TYGLNRRHNMAGQLV     | NS5  | 3095 | 3109 | HLA-DRB1*04:03            | 100%      | Dengue virus 3 | ELISPOT           | IFNg release        | Positive     | 0 | 1 | 0 | 0 | 0 | 0 |
| 540152  | KLTWHTGYSYKAT       | NS5  | 2789 | 2803 | HLA-DRB1*09:01            | 100%      | Dengue virus 3 | ELISPOT           | IFNg release        | Positive     | 1 | 1 | 1 | 0 | 0 | 0 |
| 738829  | ERELKLGKCGSCCY      | NS5  | 2927 | 2941 | HLA-DRB1*11:04            | 100%      | Dengue virus 3 | ELISPOT           | IFNg release        | Positive     | 1 | 1 | 1 | 0 | 0 | 0 |
| 867376  | KAYAQMWSLMYFHR      | NS5  | 3246 | 3260 | HLA-DRB5*01:01            | 100%      | Dengue virus 3 | ELISPOT           | IFNg release        | Positive     | 0 | 1 | 0 | 0 | 0 | 0 |
| 869489  | VKPIDDFRANALL       | NS5  | 3157 | 3171 | HLA-DPB1*01:01            | 100%      | Dengue virus 3 | ELISPOT           | IFNg release        | Positive     | 1 | 1 | 1 | 0 | 0 | 0 |
| 1068391 | TGKPSNNMLKRVNR      | C    | 8    | 22   | HLA-DRB1*11:01            | 81% <100% | Dengue virus 3 | ELISPOT           | IFNg release        | Positive-Low | 1 | 1 | 1 | 0 | 0 | 0 |
| 195303  | FKKEISNNMLSINKR     | C    | 37   | 51   | HLA-DRB1*04:01            | 81% <100% | Dengue virus 3 | ELISPOT           | IFNg release        | Positive     | 0 | 1 | 0 | 0 | 0 | 0 |
| 195306  | FLRFLAIPPTAGVLA     | C    | 6    | 20   | HLA-DRB1*01:01            | 81% <100% | Dengue virus 3 | ELISPOT           | IFNg release        | Positive     | 1 | 1 | 1 | 0 | 0 | 0 |
| 195469  | IAFLRFLAIPPTAGV     | C    | 4    | 18   | HLA-DRB1*04:01            | 81% <100% | Dengue virus 3 | ELISPOT           | IFNg release        | Positive     | 1 | 1 | 1 | 0 | 0 | 0 |
| 195518  | INMLKRVNRNVSTGS     | C    | 13   | 27   | HLA-DRB1*08:02            | 81% <100% | Dengue virus 3 | ELISPOT           | IFNg release        | Positive     | 1 | 1 | 1 | 0 | 0 | 0 |
| 195536  | ISNNMLSINKRRKS      | C    | 41   | 55   | HLA-DRB1*11:01            | 81% <100% | Dengue virus 3 | ELISPOT           | IFNg release        | Positive     | 0 | 1 | 0 | 0 | 0 | 0 |
| 195559  | KEISNNMLSINKRRK     | C    | 39   | 53   | HLA-DRB1*04:01            | 81% <100% | Dengue virus 3 | ELISPOT           | IFNg release        | Positive     | 0 | 1 | 0 | 0 | 0 | 0 |
| 195611  | LARWGTFFKSGAIVK     | C    | 19   | 33   | HLA-DRB1*07:01            | 81% <100% | Dengue virus 3 | ELISPOT           | IFNg release        | Positive     | 1 | 1 | 1 | 0 | 0 | 0 |
| 195649  | LKGFKEISNNMLSL      | C    | 34   | 48   | HLA-DRB1*07:01            | 81% <100% | Dengue virus 3 | ELISPOT           | IFNg release        | Positive     | 0 | 1 | 0 | 0 | 0 | 0 |
| 195961  | SNNMLKRVNRNVSTG     | C    | 12   | 26   | HLA-DRB1*08:02            | 81% <100% | Dengue virus 3 | ELISPOT           | IFNg release        | Positive     | 1 | 1 | 1 | 0 | 0 | 0 |
| 196818  | LKGFKEISNNML        | C    | 81   | 92   | HLA-DPw4                  | 81% <100% | Dengue virus 3 | ELISPOT           | IFNg release        | Positive     | 0 | 1 | 0 | 0 | 0 | 0 |
| 539502  | KPSNNMLKRVNRVVS     | C    | 10   | 24   | HLA-DRB1*08:03            | 81% <100% | Dengue virus 3 | ELISPOT           | IFNg release        | Positive     | 1 | 1 | 1 | 0 | 0 | 0 |
| 539787  | PSNNMLKRVNRVST      | C    | 11   | 25   | HLA-DRB1*14:04            | 81% <100% | Dengue virus 3 | ELISPOT           | IFNg release        | Positive     | 1 | 1 | 1 | 0 | 0 | 0 |
| 539926  | SNNMLSINKRRKTSL     | C    | 42   | 56   | HLA-DRB1*12:02            | 81% <100% | Dengue virus 3 | ELISPOT           | IFNg release        | Positive     | 0 | 1 | 0 | 0 | 0 | 0 |
| 540121  | WGTFKSGAIVKLG       | C    | 22   | 36   | HLA-DRB1*09:01            | 81% <100% | Dengue virus 3 | ELISPOT           | IFNg release        | Positive     | 0 | 1 | 0 | 0 | 0 | 0 |
| 738443  | AFRLRFLAIPPTAGV     | C    | 52   | 66   | HLA-DRB1*04:07            | 81% <100% | Dengue virus 3 | ELISPOT           | IFNg release        | Positive     | 1 | 1 | 1 | 0 | 0 | 0 |
| 740207  | RWGTFFKSGAIVKLG     | C    | 68   | 82   | HLA-DRB1*14:02            | 81% <100% | Dengue virus 3 | ELISPOT           | IFNg release        | Positive     | 0 | 1 | 0 | 0 | 0 | 0 |
| 195602  | KVIFLLMLVTPSM       | PreM | 265  | 279  | HLA-DRB1*01:01            | 81% <100% | Dengue virus 3 | ELISPOT           | IFNg release        | Positive     | 1 | 0 | 1 | 1 | 1 | 1 |
| 195726  | LTQKVFILLMLVT       | PreM | 262  | 276  | HLA-DRB1*11:01            | 81% <100% | Dengue virus 3 | ELISPOT           | IFNg release        | Positive     | 1 | 0 | 1 | 1 | 1 | 1 |
| 196203  | VVIFLLMLVTPSMT      | PreM | 266  | 280  | HLA-DRB1*07:01            | 81% <100% | Dengue virus 3 | ELISPOT           | IFNg release        | Positive     | 1 | 0 | 1 | 0 | 1 | 1 |
| 540004  | TSLQTKVIFLLML       | PreM | 260  | 274  | HLA-DPB1*04:02            | 81% <100% | Dengue virus 3 | ELISPOT           | IFNg release        | Positive     | 1 | 0 | 1 | 1 | 1 | 1 |
| 869302  | TQKVVIFLLMLVP       | PreM | 263  | 277  | HLA-DPB1*04:02            | 81% <100% | Dengue virus 3 | ELISPOT           | IFNg release        | Positive     | 1 | 0 | 1 | 1 | 1 | 1 |
| 119327  | REKLLVTKNAHAACK     | E    | 231  | 245  | HLA-DR2                   | 81% <100% | Dengue virus 3 | ELISPOT           | IFNg release        | Positive     | 0 | 1 | 0 | 1 | 1 | 1 |
| 195252  | ELLVTKNAHAACKQE     | E    | 513  | 527  | HLA-DRB1*04:01            | 81% <100% | Dengue virus 3 | ELISPOT           | IFNg release        | Positive     | 1 | 1 | 1 | 1 | 1 | 1 |
| 195416  | GRITANPWWTKKE       | E    | 627  | 641  | HLA-DRB1*08:02            | 81% <100% | Dengue virus 3 | ELISPOT           | IFNg release        | Positive     | 1 | 1 | 1 | 1 | 1 | 1 |
| 195813  | NRLVTKNAHAACK       | E    | 512  | 526  | HLA-DRB1*04:01            | 81% <100% | Dengue virus 3 | ELISPOT           | IFNg release        | Positive     | 1 | 0 | 1 | 1 | 1 | 1 |
| 539460  | KELVTKNAHAACKQ      | E    | 512  | 526  | HLA-DRB1*08:02            | 81% <100% | Dengue virus 3 | ELISPOT           | IFNg release        | Positive     | 1 | 1 | 1 | 1 | 1 | 1 |
| 539559  | LGMVHDFGSAYTA       | E    | 710  | 724  | HLA-DRB1*04:03            | 81% <100% | Dengue virus 3 | ELISPOT           | IFNg release        | Positive     | 1 | 1 | 1 | 1 | 1 | 1 |
| 739011  | GGVNSLGMVHDFG       | E    | 704  | 718  | HLA-DRB1*11:04            | 81% <100% | Dengue virus 3 | ELISPOT           | IFNg release        | Positive     | 1 | 1 | 1 | 1 | 1 | 1 |
| 739041  | GMSYAMCNTFVAKK      | E    | 574  | 588  | HLA-DRB1*04:07            | 81% <100% | Dengue virus 3 | ELISPOT           | IFNg release        | Positive     | 0 | 0 | 0 | 0 | 0 | 0 |
| 739344  | KMVHDFGSAYTALF      | E    | 31   | 45   | HLA-DRB3*02:02            | 81% <100% | Dengue virus 3 | ELISPOT           | IFNg release        | Positive     | 1 | 1 | 1 | 1 | 1 | 1 |
| 740409  | SVGVLNSLGMVHDFG     | E    | 702  | 716  | HLA-DRB1*11:04            | 81% <100% | Dengue virus 3 | ELISPOT           | IFNg release        | Positive     | 1 | 1 | 1 | 1 | 1 | 1 |
| 741746  | MRCVGVGNRDFVGLSGATW | E    | 281  | 300  | HLA class II              | 81% <100% | Dengue virus 3 | ELISPOT           | IFNg release        | Positive     | 1 | 1 | 1 | 1 | 1 | 1 |
| 868175  | MVHRQVFDPLPLPWT     | E    | 485  | 499  | HLA-DQA1*01:01/DOB1*05:01 | 81% <100% | Dengue virus 3 | ELISPOT           | IFNg release        | Positive     | 1 | 1 | 1 | 1 | 1 | 1 |
| 190705  | AKVITAETQNSFFI      | NS1  | 894  | 908  | HLA-DRB1*04:01            | 81% <100% | Dengue virus 3 | ELISPOT           | IFNg release        | Positive     | 1 | 1 | 1 | 0 | 0 | 0 |
| 190996  | TEQYKQFADSPKRLA     | NS1  | 802  | 816  | HLA-DRB5*01:01            | 81% <100% | Dengue virus 3 | ELISPOT           | IFNg release        | Positive     | 1 | 1 | 1 | 0 | 0 | 0 |
| 195419  | GSMWLKASIEVKT       | NS1  | 981  | 995  | HLA-DRB1*01:01            | 81% <100% | Dengue virus 3 | ELISPOT           | IFNg release        | Positive     | 1 | 1 | 1 | 0 | 0 | 0 |
| 195577  | KLTVWGDITGVLEQ      | NS1  | 858  | 872  | HLA-DRB1*03:01            | 81% <100% | Dengue virus 3 | ELISPOT           | IFNg release        | Positive     | 0 | 0 | 0 | 0 | 0 | 0 |
| 196235  | YKQFQDSPKRLATAI     | NS1  | 805  | 819  | HLA-DRB1*03:01            | 81% <100% | Dengue virus 3 | ELISPOT           | IFNg release        | Positive     | 1 | 1 | 1 | 0 | 0 | 0 |
| 539717  | NGSLVTKNAHAACK      | NS1  | 980  | 994  | HLA-DRB1*09:01            | 81% <100% | Dengue virus 3 | ELISPOT           | IFNg release        | Positive     | 1 | 1 | 1 | 0 | 0 | 0 |
| 539825  | QYKQFADSPKRLATA     | NS1  | 804  | 818  | HLA-DRB3*02:02            | 81% <100% | Dengue virus 3 | ELISPOT           | IFNg release        | Positive     | 1 | 1 | 1 | 0 | 0 | 0 |
| 167810  | RENLLVGLAMATTLQPE   | NS2a | 1224 | 1243 | HLA-DP                    | 81% <100% | Dengue virus 3 | ELISPOT           | IFNg release        | Positive     | 1 | 0 | 1 | 0 | 0 | 0 |
| 195632  | LGFFLRKLTSRNELL     | NS2a | 1224 | 1228 | HLA-DRB1*11:01            | 81% <100% | Dengue virus 3 | ELISPOT           | IFNg release        | Positive     | 1 | 0 | 1 | 0 | 0 | 0 |
| 195645  | LISLTCNFTFLTV       | NS2a | 1274 | 1288 | HLA-DRB1*07:01            | 81% <100% | Dengue virus 3 | ELISPOT           | IFNg release        | Positive     | 0 | 0 | 0 | 0 | 0 | 0 |
| 195836  | PLPFLSKDITKRRS      | NS2a | 13   |      |                           |           |                |                   |                     |              |   |   |   |   |   |   |



|        |                     |      |      |      |                           |          |                |             |              |          |   |   |   |   |   |   |
|--------|---------------------|------|------|------|---------------------------|----------|----------------|-------------|--------------|----------|---|---|---|---|---|---|
| 195335 | FTFVLLSGQITWRD      | NS2a | 1163 | 1177 | HLA-DRB1*15:02            | 51%-80%  | Dengue virus 3 | ELISPOT     | IFNg release | Positive | 1 | 0 | 1 | 0 | 0 | 0 |
| 195429 | GVFFTFVLLSGQIT      | NS2a | 1160 | 1174 | HLA-DRB1*04:01            | 51%-80%  | Dengue virus 3 | ELISPOT     | IFNg release | Positive | 0 | 0 | 0 | 0 | 0 | 0 |
| 195457 | HMIAGVFTFVLLS       | NS2a | 1156 | 1170 | HLA-DRB1*11:01            | 51%-80%  | Dengue virus 3 | ELISPOT     | IFNg release | Positive | 0 | 0 | 0 | 0 | 0 | 0 |
| 867116 | IAGVFTFVLLSGQ       | NS2a | 1158 | 1172 | HLA-DPB1*01:01            | 51%-80%  | Dengue virus 3 | ELISPOT     | IFNg release | Positive | 0 | 0 | 0 | 0 | 0 | 0 |
| 167823 | TMRIKDDETENILVLLKTA | NS2b | 83   | 102  | HLA-DRB1*15:01            | 51%-80%  | Dengue virus 3 | ELISPOT     | IFNg release | Positive | 1 | 1 | 1 | 0 | 0 | 0 |
| 195144 | AIVREAIKRRRLTLI     | NS3  | 1680 | 1694 | HLA-DRB1*08:02            | 51%-80%  | Dengue virus 3 | ELISPOT     | IFNg release | Positive | 1 | 1 | 1 | 0 | 0 | 0 |
| 38401  | LPAINREAIKRRRLTL    | NS3  | 1678 | 1692 | HLA-DRB3*02:02            | 51%-80%  | Dengue virus 3 | ELISPOT     | IFNg release | Positive | 1 | 1 | 1 | 0 | 0 | 0 |
| 539714 | NGKKVQLSRKTFDT      | NS3  | 1852 | 1866 | HLA-DRB1*12:02            | 51%-80%  | Dengue virus 3 | ELISPOT     | IFNg release | Positive | 1 | 1 | 1 | 0 | 0 | 0 |
| 54455  | RKYLPAIVRE          | NS3  | 202  | 211  | HLA-DR15                  | 51%-80%  | Dengue virus 3 | 51 chromium | cytotoxicity | Positive | 1 | 1 | 1 | 0 | 0 | 0 |
| 70708  | VREAIKRRRLTLIA      | NS3  | 1682 | 1696 | HLA-DRB1*12:02            | 51%-80%  | Dengue virus 3 | ELISPOT     | IFNg release | Positive | 1 | 1 | 1 | 0 | 0 | 0 |
| 867358 | IVREAIKRRRLTLIL     | NS3  | 1681 | 1695 | HLA-DRB3*02:02            | 51%-80%  | Dengue virus 3 | ELISPOT     | IFNg release | Positive | 1 | 1 | 1 | 0 | 0 | 0 |
| 867534 | KYLPAINREAIKRRLL    | NS3  | 1676 | 1690 | HLA-DRB4*01:01            | 51%-80%  | Dengue virus 3 | ELISPOT     | IFNg release | Positive | 1 | 1 | 1 | 0 | 0 | 0 |
| 195807 | NPLTLTAVALLLITH     | NS4b | 2345 | 2359 | HLA-DRB1*07:01            | 51%-80%  | Dengue virus 3 | ELISPOT     | IFNg release | Positive | 0 | 0 | 0 | 0 | 0 | 0 |
| 196163 | VNPLTLTAVALLLIT     | NS4b | 2344 | 2358 | HLA-DRB1*01:01            | 51%-80%  | Dengue virus 3 | ELISPOT     | IFNg release | Positive | 0 | 0 | 0 | 0 | 0 | 0 |
| 195410 | GNIVSSVNMVSRLLH     | NS5  | 2715 | 2729 | HLA-DRB1*03:01            | 51%-80%  | Dengue virus 3 | ELISPOT     | IFNg release | Positive | 1 | 1 | 1 | 0 | 0 | 0 |
| 195806 | NMVSRLLLNRFMTMTH    | NS5  | 2722 | 2736 | HLA-DRB1*08:02            | 51%-80%  | Dengue virus 3 | ELISPOT     | IFNg release | Positive | 1 | 1 | 1 | 0 | 0 | 0 |
| 196041 | TGNIVSSVNMVSRLL     | NS5  | 2714 | 2728 | HLA-DRB1*04:01            | 51%-80%  | Dengue virus 3 | ELISPOT     | IFNg release | Positive | 1 | 1 | 1 | 0 | 0 | 0 |
| 196162 | VNMVSRLLLNRFMT      | NS5  | 9    | 23   | HLA-DRB1*11:01            | 51%-80%  | Dengue virus 3 | ELISPOT     | IFNg release | Positive | 1 | 1 | 1 | 0 | 0 | 0 |
| 539449 | IVSSVNMVSRLLLNRR    | NS5  | 2717 | 2731 | HLA-DRB1*11:04            | 51%-80%  | Dengue virus 3 | ELISPOT     | IFNg release | Positive | 1 | 1 | 1 | 0 | 0 | 0 |
| 539945 | VNMVSRLLLNRFMT      | NS5  | 2720 | 2734 | HLA-DRB1*12:02            | 51%-80%  | Dengue virus 3 | ELISPOT     | IFNg release | Positive | 1 | 1 | 1 | 0 | 0 | 0 |
| 540090 | VSSVNMVSRLLLNRR     | NS5  | 2718 | 2732 | HLA-DRB1*14:04            | 51%-80%  | Dengue virus 3 | ELISPOT     | IFNg release | Positive | 1 | 1 | 1 | 0 | 0 | 0 |
| 866168 | ARLFEALGFLEND       | NS5  | 2970 | 2984 | HLA-DQA1*03:01/DOB1*03:02 | 51%-80%  | Dengue virus 3 | ELISPOT     | IFNg release | Positive | 1 | 0 | 1 | 0 | 0 | 0 |
| 868748 | SAKLQWVVERNMVIP     | NS5  | 2549 | 2563 | HLA-DQA1*01:01/DOB1*05:01 | 51%-80%  | Dengue virus 3 | ELISPOT     | IFNg release | Positive | 1 | 1 | 1 | 0 | 0 | 0 |
| 591723 | NMLSIINRRKXTSLC     | C    | 90   | 104  | HLA-DRB1*11:01            | >0% -50% | Dengue virus 3 | ELISPOT     | IFNg release | Positive | 1 | 0 | 1 | 0 | 0 | 0 |
| 868645 | RGLNGOGPMKLYMA      | C    | 15   | 29   | HLA-DRB3*02:02            | >0% -50% | Dengue virus 3 | ELISPOT     | IFNg release | Positive | 1 | 1 | 1 | 0 | 0 | 0 |
| 190823 | KLTVVGVDDIIVLEQ     | NS1  | 85   | 99   | HLA-DR2                   | >0% -50% | Dengue virus 3 | ELISPOT     | IFNg release | Positive | 1 | 1 | 1 | 0 | 0 | 0 |
| 195125 | AGVFTFVLLSGQI       | NS2a | 1159 | 1173 | HLA-DRB1*07:01            | >0% -50% | Dengue virus 3 | ELISPOT     | IFNg release | Positive | 0 | 0 | 0 | 0 | 0 | 0 |
| 195740 | LWTALVSLTCSNTIF     | NS2a | 1270 | 1284 | HLA-DRB1*07:01            | >0% -50% | Dengue virus 3 | ELISPOT     | IFNg release | Positive | 0 | 1 | 0 | 0 | 0 | 0 |
| 539802 | QFETYQLWVALVSLT     | NS2a | 1264 | 1278 | HLA-DRB1*15:02            | >0% -50% | Dengue virus 3 | ELISPOT     | IFNg release | Positive | 0 | 1 | 0 | 0 | 0 | 0 |
| 868109 | MIAGVFTFVLLSG       | NS2a | 1157 | 1171 | HLA-DPB1*04:02            | >0% -50% | Dengue virus 3 | ELISPOT     | IFNg release | Positive | 0 | 0 | 0 | 0 | 0 | 0 |
| 539432 | IREAIKRRRLTLILA     | NS3  | 1682 | 1696 | HLA-DRB1*08:03            | >0% -50% | Dengue virus 3 | ELISPOT     | IFNg release | Positive | 0 | 0 | 0 | 0 | 0 | 0 |
| 196168 | VPLQWIASAIVLEFF     | NS4a | 2192 | 2206 | HLA-DRB1*01:01            | >0% -50% | Dengue virus 3 | ELISPOT     | IFNg release | Positive | 1 | 1 | 1 | 0 | 0 | 0 |
| 869474 | VIGILTAAIAANE       | NS4a | 2230 | 2244 | HLA-DQA1*01:02/DOB1*06:02 | >0% -50% | Dengue virus 3 | ELISPOT     | IFNg release | Positive | 0 | 0 | 0 | 0 | 0 | 0 |
| 195663 | LLLTHTYAIIGPGLQ     | NS4b | 2354 | 2368 | HLA-DRB1*07:01            | >0% -50% | Dengue virus 3 | ELISPOT     | IFNg release | Positive | 0 | 0 | 0 | 0 | 0 | 0 |
| 196023 | TAAVLLTHTYAIIG      | NS4b | 2350 | 2364 | HLA-DRB1*15:01            | >0% -50% | Dengue virus 3 | ELISPOT     | IFNg release | Positive | 0 | 0 | 0 | 0 | 0 | 0 |
| 869526 | VLLLTHTYAIIGPGL     | NS4b | 2353 | 2367 | HLA-DPB1*02:01            | >0% -50% | Dengue virus 3 | ELISPOT     | IFNg release | Positive | 1 | 0 | 1 | 0 | 0 | 0 |
| 196239 | YQNKVVKVQRPTPKG     | NS5  | 3062 | 3076 | HLA-DRB1*08:02            | >0% -50% | Dengue virus 3 | ELISPOT     | IFNg release | Positive | 1 | 1 | 1 | 0 | 0 | 0 |



## CD4 DENV-4 Epitopes

| Epitope_ID | AA_Seq               | Protein_Name | Start | End  | Allele                    | Step | Serotype       | Method/Technique | Assay Group  | Qualitative Measure | DENV-4 constructs of vaccines (100% identity=1, green ; else 0, red) |      |      |           |        |      |
|------------|----------------------|--------------|-------|------|---------------------------|------|----------------|------------------|--------------|---------------------|----------------------------------------------------------------------|------|------|-----------|--------|------|
|            |                      |              |       |      |                           |      |                |                  |              |                     | TV003                                                                | TDEN | DPV1 | Dengvaxia | DENVax | TV0V |
| 195483     | IGRFRKIGRMILNLN      | C            | 81    | 95   | HLA-DRB1*04:01            | 0%   | Dengue virus 4 | ELISPOT          | IFNg release | Positive            | 1                                                                    | 1    | 1    | 0         | 0      | 0    |
| 195488     | IGRMILNLNRRKST       | C            | 87    | 101  | HLA-DRB1*14:02            | 0%   | Dengue virus 4 | ELISPOT          | IFNg release | Positive            | 0                                                                    | 0    | 1    | 0         | 0      | 0    |
| 195580     | KNKAKILITGRFKEI      | C            | 53    | 67   | HLA-DRB1*15:01            | 0%   | Dengue virus 4 | ELISPOT          | IFNg release | Positive            | 1                                                                    | 1    | 1    | 0         | 0      | 0    |
| 195578     | MTLLCLIPITAMAFHL     | C            | 102   | 116  | HLA-DRB1*01:01            | 0%   | Dengue virus 4 | ELISPOT          | IFNg release | Positive            | 0                                                                    | 0    | 0    | 0         | 0      | 0    |
| 195922     | RWGLQKTKIAKILT       | C            | 67    | 81   | HLA-DRB1*07:01            | 0%   | Dengue virus 4 | ELISPOT          | IFNg release | Positive            | 0                                                                    | 0    | 0    | 0         | 0      | 0    |
| 196065     | TPGGLVKFRSGLFS       | C            | 24    | 38   | HLA-DRB1*15:01            | 0%   | Dengue virus 4 | ELISPOT          | IFNg release | Positive            | 0                                                                    | 0    | 0    | 0         | 0      | 0    |
| 36533      | LIGFRKIGRMILNLN      | C            | 80    | 94   | HLA-DRB1*09:01            | 0%   | Dengue virus 4 | ELISPOT          | IFNg release | Positive            | 1                                                                    | 1    | 1    | 0         | 0      | 0    |
| 539571     | LIGFRKIGRMILNLN      | C            | 80    | 94   | HLA-DRB1*14:04            | 0%   | Dengue virus 4 | ELISPOT          | IFNg release | Positive            | 1                                                                    | 1    | 1    | 0         | 0      | 0    |
| 539581     | LKXNKAKILITGRFKEI    | C            | 51    | 65   | HLA-DRB1*14:04            | 0%   | Dengue virus 4 | ELISPOT          | IFNg release | Positive            | 1                                                                    | 1    | 1    | 0         | 0      | 0    |
| 540116     | WGQLKKXNKAKILIG      | C            | 68    | 82   | HLA-DRB1*09:01            | 0%   | Dengue virus 4 | ELISPOT          | IFNg release | Positive            | 1                                                                    | 1    | 1    | 0         | 0      | 0    |
| 739060     | GRMLNLNRRKST         | C            | 88    | 102  | HLA-DRB1*14:02            | 0%   | Dengue virus 4 | ELISPOT          | IFNg release | Positive            | 0                                                                    | 0    | 0    | 0         | 0      | 0    |
| 739178     | IGRMILNLNRRRST       | C            | 87    | 101  | HLA-DRB1*14:02            | 0%   | Dengue virus 4 | ELISPOT          | IFNg release | Positive            | 0                                                                    | 0    | 0    | 0         | 0      | 0    |
| 868732     | RWGLQKKNKAKILIT      | C            | 39    | 53   | HLA-DRB3*02:02            | 0%   | Dengue virus 4 | ELISPOT          | IFNg release | Positive            | 1                                                                    | 1    | 1    | 0         | 0      | 0    |
| 195916     | RTVFFVLMMLVAPSY      | PreM         | 264   | 278  | HLA-DQA1*01:02/DOB1*06:02 | 0%   | Dengue virus 4 | ELISPOT          | IFNg release | Positive            | 1                                                                    | 1    | 1    | 0         | 1      | 1    |
| 869670     | WCNLSTVWVWYGTCT      | PreM         | 180   | 194  | HLA class II              | 0%   | Dengue virus 4 | ELISPOT          | IFNg release | Positive            | 1                                                                    | 1    | 1    | 0         | 1      | 0    |
| 167808     | RDVNVKEKVVGRVISTPLAE | E            | 340   | 359  | HLA class II              | 0%   | Dengue virus 4 | ELISPOT          | IFNg release | Positive            | 0                                                                    | 0    | 0    | 0         | 0      | 0    |
| 195227     | DSYVWVGNSALT         | E            | 654   | 668  | HLA-DRB1*15:06            | 0%   | Dengue virus 4 | ELISPOT          | IFNg release | Positive            | 1                                                                    | 1    | 1    | 0         | 1      | 0    |
| 195364     | GGVSWMIRILGLVLV      | E            | 449   | 463  | HLA-DRB1*15:06            | 0%   | Dengue virus 4 | ELISPOT          | IFNg release | Positive            | 0                                                                    | 0    | 0    | 0         | 0      | 0    |
| 195434     | GVSWMIRILGLFVLV      | E            | 729   | 743  | HLA-DRB1*08:02            | 0%   | Dengue virus 4 | ELISPOT          | IFNg release | Positive            | 1                                                                    | 1    | 1    | 0         | 1      | 0    |
| 195435     | GVSWMIRILGLLVLV      | E            | 729   | 743  | HLA-DRB1*15:06            | 0%   | Dengue virus 4 | ELISPOT          | IFNg release | Positive            | 0                                                                    | 0    | 0    | 0         | 0      | 0    |
| 195625     | LESTYRGAKRMALIG      | E            | 681   | 695  | HLA-DRB1*14:02            | 0%   | Dengue virus 4 | ELISPOT          | IFNg release | Positive            | 0                                                                    | 0    | 0    | 0         | 0      | 1    |
| 196036     | TGIGRTVFLVLMMLV      | E            | 44    | 58   | HLA-DRB1*07:01            | 0%   | Dengue virus 4 | ELISPOT          | IFNg release | Positive            | 1                                                                    | 1    | 1    | 0         | 1      | 1    |
| 196189     | VSIVIRILGLLVLV       | E            | 451   | 465  | HLA-DRB1*15:06            | 0%   | Dengue virus 4 | ELISPOT          | IFNg release | Positive            | 0                                                                    | 0    | 0    | 0         | 0      | 0    |
| 539230     | EMIMKQVITNLMYYL      | E            | 474   | 488  | HLA-DRB1*12:02            | 0%   | Dengue virus 4 | ELISPOT          | IFNg release | Positive            | 1                                                                    | 1    | 1    | 0         | 1      | 1    |
| 195791     | NIMWQVITNLMYYL       | NS1          | 839   | 853  | HLA-DRB1*04:07            | 0%   | Dengue virus 4 | ELISPOT          | IFNg release | Positive            | 0                                                                    | 0    | 0    | 0         | 0      | 0    |
| 539829     | QYQFQSPASRLASA       | NS1          | 805   | 819  | HLA-DRB1*09:01            | 0%   | Dengue virus 4 | ELISPOT          | IFNg release | Positive            | 0                                                                    | 0    | 0    | 0         | 0      | 0    |
| 167725     | AMITTLSPHLDLMELDISG  | NS2a         | 50    | 69   | HLA class II              | 0%   | Dengue virus 4 | ELISPOT          | IFNg release | Positive            | 0                                                                    | 0    | 0    | 0         | 0      | 0    |
| 195156     | ALSLTFRSTMPVLM       | NS2a         | 1274  | 1288 | HLA-DRB1*07:01            | 0%   | Dengue virus 4 | ELISPOT          | IFNg release | Positive            | 1                                                                    | 1    | 1    | 0         | 0      | 0    |
| 195157     | ALSLTFRSTMSLMV       | NS2a         | 1274  | 1288 | HLA-DRB1*04:01            | 0%   | Dengue virus 4 | ELISPOT          | IFNg release | Positive            | 0                                                                    | 0    | 0    | 0         | 0      | 0    |
| 195158     | ALSLTFRSTPLVM        | NS2a         | 1274  | 1288 | HLA-DRB1*07:01            | 0%   | Dengue virus 4 | ELISPOT          | IFNg release | Positive            | 0                                                                    | 0    | 0    | 0         | 0      | 0    |
| 195190     | AVFKMSPGVYGVFL       | NS2a         | 1204  | 1218 | HLA-DRB1*01:01            | 0%   | Dengue virus 4 | ELISPOT          | IFNg release | Positive            | 1                                                                    | 1    | 1    | 0         | 0      | 0    |
| 195221     | DLMLISGISGLIL        | NS2a         | 1243  | 1257 | HLA-DRB1*07:01            | 0%   | Dengue virus 4 | ELISPOT          | IFNg release | Positive            | 0                                                                    | 0    | 0    | 0         | 0      | 0    |
| 195746     | MAVFKMSPGVYGVFL      | NS2a         | 1203  | 1217 | HLA-DRB1*07:01            | 0%   | Dengue virus 4 | ELISPOT          | IFNg release | Positive            | 1                                                                    | 1    | 1    | 0         | 0      | 0    |
| 196061     | TMSVMAVWITMAVL       | NS2a         | 1283  | 1297 | HLA-DRB1*03:01            | 0%   | Dengue virus 4 | ELISPOT          | IFNg release | Positive            | 0                                                                    | 0    | 0    | 0         | 0      | 0    |
| 196070     | TRKHMILAVITLCA       | NS2a         | 1154  | 1168 | HLA-DRB1*08:02            | 0%   | Dengue virus 4 | ELISPOT          | IFNg release | Positive            | 0                                                                    | 0    | 0    | 0         | 0      | 0    |
| 196253     | YVLGVFLRKITSRET      | NS2a         | 1212  | 1226 | HLA-DRB1*11:01            | 0%   | Dengue virus 4 | ELISPOT          | IFNg release | Positive            | 1                                                                    | 1    | 1    | 0         | 0      | 0    |
| 539130     | CLRRRVTRKHMILAV      | NS2a         | 1148  | 1162 | HLA-DRB1*08:03            | 0%   | Dengue virus 4 | ELISPOT          | IFNg release | Positive            | 0                                                                    | 0    | 0    | 0         | 0      | 0    |
| 539198     | CLRRRVTRKHMILAV      | NS2a         | 1147  | 1161 | HLA-DRB1*13:01            | 0%   | Dengue virus 4 | ELISPOT          | IFNg release | Positive            | 0                                                                    | 0    | 0    | 0         | 0      | 0    |
| 539360     | YVLGVFLRKITSRETALM   | NS2a         | 1215  | 1229 | HLA-DRB1*10:01            | 0%   | Dengue virus 4 | ELISPOT          | IFNg release | Positive            | 1                                                                    | 1    | 1    | 0         | 0      | 0    |
| 539406     | IGGQHLAIMAVFKM       | NS2a         | 1194  | 1208 | HLA-DRB1*13:01            | 0%   | Dengue virus 4 | ELISPOT          | IFNg release | Positive            | 1                                                                    | 1    | 1    | 0         | 0      | 0    |
| 539407     | IGGQHLAIMAVFKM       | NS2a         | 1194  | 1208 | HLA-DRB1*13:01            | 0%   | Dengue virus 4 | ELISPOT          | IFNg release | Positive            | 0                                                                    | 0    | 0    | 0         | 0      | 0    |
| 539433     | IRSTMPLVMAVWITM      | NS2a         | 1280  | 1294 | HLA-DRB1*13:01            | 0%   | Dengue virus 4 | ELISPOT          | IFNg release | Positive            | 1                                                                    | 1    | 1    | 0         | 0      | 0    |
| 539434     | IRSTMPLVMAVWITM      | NS2a         | 1280  | 1294 | HLA-DRB1*13:01            | 0%   | Dengue virus 4 | ELISPOT          | IFNg release | Positive            | 0                                                                    | 0    | 0    | 0         | 0      | 0    |
| 539565     | GLVFLRKITSRETAL      | NS2a         | 1214  | 1228 | HLA-DRB1*08:03            | 0%   | Dengue virus 4 | ELISPOT          | IFNg release | Positive            | 1                                                                    | 1    | 1    | 0         | 0      | 0    |
| 539627     | LSLTFIRSTMPLVMA      | NS2a         | 1275  | 1289 | HLA-DRB1*10:01            | 0%   | Dengue virus 4 | ELISPOT          | IFNg release | Positive            | 1                                                                    | 1    | 1    | 0         | 0      | 0    |
| 539628     | LSLTFIRSTPLVMA       | NS2a         | 1275  | 1289 | HLA-DRB1*08:03            | 0%   | Dengue virus 4 | ELISPOT          | IFNg release | Positive            | 0                                                                    | 0    | 0    | 0         | 0      | 0    |
| 539919     | SLTFRSTMPVMAVW       | NS2a         | 1276  | 1290 | HLA-DRB1*09:01            | 0%   | Dengue virus 4 | ELISPOT          | IFNg release | Positive            | 1                                                                    | 1    | 1    | 0         | 0      | 0    |
| 539921     | SLTFRSTPLVMAVW       | NS2a         | 1276  | 1290 | HLA-DRB1*04:03            | 0%   | Dengue virus 4 | ELISPOT          | IFNg release | Positive            | 0                                                                    | 0    | 0    | 0         | 0      | 0    |
| 539961     | TALMVGIMAMTTLS       | NS2a         | 1226  | 1240 | HLA-DRB1*01:02            | 0%   | Dengue virus 4 | ELISPOT          | IFNg release | Positive            | 0                                                                    | 0    | 0    | 0         | 0      | 0    |
| 540033     | VFKMSPGVYGVFLR       | NS2a         | 1205  | 1219 | HLA-DRB1*09:01            | 0%   | Dengue virus 4 | ELISPOT          | IFNg release | Positive            | 1                                                                    | 1    | 1    | 0         | 0      | 0    |
| 540053     | VLGVLRLKITSRETA      | NS2a         | 1213  | 1227 | HLA-DRB1*14:04            | 0%   | Dengue virus 4 | ELISPOT          | IFNg release | Positive            | 1                                                                    | 1    | 1    | 0         | 0      | 0    |
| 789559     | AVITTCILAILGLLT      | NS2a         | 1161  | 1175 | HLA-DRB1*15:02            | 0%   | Dengue virus 4 | ELISPOT          | IFNg release | Positive            | 0                                                                    | 0    | 0    | 0         | 0      | 0    |
| 867869     | LTFRSTPLVMAVW        | NS2a         | 1277  | 1291 | HLA-DRB3*02:02            | 0%   | Dengue virus 4 | ELISPOT          | IFNg release | Positive            | 0                                                                    | 0    | 0    | 0         | 0      | 0    |
| 45689      | NRKGIVGLGVGVGV       | NS3          | 141   | 155  | HLA-DRB1*15:01            | 0%   | Dengue virus 4 | ICS              | IFNg release | Positive            | 0                                                                    | 0    | 0    | 0         | 0      | 0    |
| 53505      | REGEXKLLRPWRDLR      | NS3          | 585   | 599  | HLA class II              | 0%   | Dengue virus 4 | ICS              | IFNg release | Positive            | 0                                                                    | 0    | 0    | 0         | 0      | 0    |
| 539020     | AAAFMTATPGGATD       | NS3          | 1783  | 1797 | HLA-DRB1*10:01            | 0%   | Dengue virus 4 | ELISPOT          | IFNg release | Positive            | 1                                                                    | 1    | 1    | 0         | 0      | 0    |
| 539021     | AAAFMTATPGGSD        | NS3          | 1783  | 1797 | HLA-DRB1*04:07            | 0%   | Dengue virus 4 | ELISPOT          | IFNg release | Positive            | 0                                                                    | 0    | 0    | 0         | 0      | 0    |
| 539023     | AAAFMTATPGTID        | NS3          | 1783  | 1797 | HLA-DRB1*04:03            | 0%   | Dengue virus 4 | ELISPOT          | IFNg release | Positive            | 0                                                                    | 0    | 0    | 0         | 0      | 0    |
| 539026     | AAAFMTATPGGATD       | NS3          | 1784  | 1798 | HLA-DRB1*09:01            | 0%   | Dengue virus 4 | ELISPOT          | IFNg release | Positive            | 1                                                                    | 1    | 1    | 0         | 0      | 0    |
| 540077     | VFEAKRLRLTLVLA       | NS3          | 1682  | 1696 | HLA-DRB1*08:03            | 0%   | Dengue virus 4 | ELISPOT          | IFNg release | Positive            | 0                                                                    | 0    | 0    | 0         | 0      | 0    |
| 868371     | PRWLDVAVADPMAL       | NS3          | 2067  | 2081 | HLA-DQA1*03:01/DOB1*03:02 | 0%   | Dengue virus 4 | ELISPOT          | IFNg release | Positive            | 1                                                                    | 1    | 1    | 0         | 0      | 0    |
| 195386     | GLTIVASGLLWVA        | NS4a         | 2176  | 2190 | HLA-DRB1*07:01            | 0%   | Dengue virus 4 | ELISPOT          | IFNg release | Positive            | 1                                                                    | 1    | 1    | 0         | 0      | 0    |
| 195551     | IYVILTLITIALVA       | NS4a         | 2227  | 2241 | HLA-DRB1*01:01            | 0%   | Dengue virus 4 | ELISPOT          | IFNg release | Positive            | 0                                                                    | 0    | 0    | 0         | 0      | 0    |
| 195648     | IYVILTLITIALV        | NS4a         | 2226  | 2240 | HLA-DRB1*07:01            | 0%   | Dengue virus 4 | ELISPOT          | IFNg release | Positive            | 0                                                                    | 0    | 0    | 0         | 0      | 0    |
| 195853     | QLIVLITLAILGL        | NS4a         | 2225  | 2239 | HLA-DRB1*15:02            | 0%   | Dengue virus 4 | ELISPOT          | IFNg release | Positive            | 0                                                                    | 0    | 0    | 0         | 0      | 0    |
| 196250     | YVLAILITIGLVAA       | NS4a         | 2228  | 2242 | HLA-DRB1*08:02            | 0%   | Dengue virus 4 | ELISPOT          | IFNg release | Positive            | 0                                                                    | 0    | 0    | 0         | 0      | 0    |
| 196251     | YVLAILITIGLVAA       | NS4a         | 2228  | 2242 | HLA-DRB1*15:02            | 0%   | Dengue virus 4 | ELISPOT          | IFNg release | Positive            | 0                                                                    | 0    | 0    | 0         | 0      | 0    |
| 539666     | MCGLTIVASGLLWV       | NS4a         | 2175  | 2189 | HLA-DRB1*09:01            | 0%   | Dengue virus 4 | ELISPOT          | IFNg release | Positive            | 1                                                                    | 1    | 1    | 0         | 0      | 0    |
| 867726     | IYVILTLITIGL         | NS4a         | 2226  | 2240 | HLA-DRB1*04:02            | 0%   | Dengue virus 4 | ELISPOT          | IFNg release | Positive            | 1                                                                    | 1    | 1    | 0         | 0      | 0    |
| 195719     | LTASLAILVHYVAIL      | NS4b         | 2346  | 2360 | HLA-DRB1*07:01            | 0%   | Dengue virus 4 | ELISPOT          | IFNg release | Positive            | 0                                                                    | 0    | 0    | 0         | 0      | 0    |
| 196055     | LTASLAILVHYVAIL      | NS4b         | 2345  | 2359 | HLA-DRB1*01:01            | 0%   | Dengue virus 4 | ELISPOT          | IFNg release | Positive            | 0                                                                    | 0    | 0    | 0         | 0      | 0    |
| 196082     | TLTASLAILVHYVAIL     | NS4b         | 2344  | 2358 | HLA-DRB1*13:01            | 0%   | Dengue virus 4 | ELISPOT          | IFNg release | Positive            | 0                                                                    | 0    | 0    | 0         | 0      | 0    |
| 196209     | WAFCEVLATGAPVL       | NS4b         | 2427  | 2441 | HLA-DRB1*07:01            | 0%   | Dengue virus 4 | ELISPOT          | IFNg release | Positive            | 0                                                                    | 0    | 0    | 0         | 0      | 0    |
| 539661     | MGCYQVNPVTLTAS       | NS4b         | 2335  | 2349 | HLA-DRB1*09:01            | 0%   | Dengue virus 4 | ELISPOT          | IFNg release | Positive            | 0                                                                    | 0    | 0    | 0         | 0      | 0    |
| 738500     | AMGCVSNVPTTLIA       | NS4b         | 2334  | 2348 | HLA-DRB1*04:07            | 0%   | Dengue virus 4 | ELISPOT          | IFNg release | Positive            | 0                                                                    | 0    | 0    | 0         | 0      | 0    |
| 195230     | DYPMVKRYSPAPSES      | NS5          | 3369  | 3383 | HLA-DRB1*11:01            | 0%   | Dengue virus 4 | ELISPOT          | IFNg release | Positive            | 1                                                                    | 1    | 1    | 0         | 0      | 0    |
| 195593     | KTFMKDGRSLVPCP       | NS5          | 3202  | 3216 | HLA-DRB1*03:01            | 0%   | Dengue virus 4 | ELISPOT          | IFNg release | Positive            | 0                                                                    | 0    | 0    | 0         | 0      | 0    |
| 195764     | MPVMKRYSPAPSEGE      | NS5          | 3371  | 3385 | HLA-DRB1*08:02            | 0%   | Dengue virus 4 | ELISPOT          | IFNg release | Positive            | 1                                                                    | 1    | 1    | 0         | 0      | 0    |
| 195835     | PKPGTRMVTMTANW       | NS5          | 2853  | 2867 | HLA-DRB1*04:01            | 0%   | Dengue virus 4 | ELISPOT          | IFNg release | Positive            | 1                                                                    | 1    | 1    | 0         | 0      | 0    |
| 195919     | RWVIDENPNMDKTP       | NS5          | 3303  | 3317 | HLA-DRB1*03:01            | 0%   | Dengue virus 4 | ELISPOT          | IFNg release | Positive            | 0                                                                    | 0    | 0    | 0         | 0      | 0    |
| 196071     | TRMVTMTANWLWAL       | NS5          | 2857  | 2871 | HLA-DRB1*04:01            | 0%   | Dengue virus 4 | ELISPOT          | IFNg release | Positive            | 1                                                                    | 1    | 1    | 0         | 0      | 0    |
| 196092     | TYQNVKVLRTPT         | NS5          | 3059  | 3073 | HLA-DRB1*08:02            | 0%   | Dengue virus 4 | ELISPOT          | IFNg release | Positive            | 1                                                                    | 1    | 1    | 0         | 0      | 0    |
| 196106     | YDVMVPMKRYSPAPSE     | NS5          | 3368  | 3382 | HLA-DRB1*11:01            | 0%   | Dengue virus 4 | ELISPOT          | IFNg release | Positive            | 1                                                                    |      |      |           |        |      |



|         |                        |      |      |      |                           |           |                |             |                      |              |   |   |   |   |   |   |
|---------|------------------------|------|------|------|---------------------------|-----------|----------------|-------------|----------------------|--------------|---|---|---|---|---|---|
| 196060  | TMPLVMAWRTIMAVL        | NS2a | 1283 | 1297 | HLA-DRB1*03:01            | 100%      | Dengue virus 4 | ELISPOT     | IFN $\gamma$ release | Positive     | 1 | 1 | 1 | 0 | 0 | 0 |
| 196227  | WVEITALLIGAAQLP        | NS2a | 1317 | 1331 | HLA-DRB1*01:01            | 100%      | Dengue virus 4 | ELISPOT     | IFN $\gamma$ release | Positive     | 1 | 1 | 1 | 0 | 0 | 0 |
| 539131  | CLRRRTYRKHMLLV         | NS2a | 1148 | 1162 | HLA-DRB1*08:03            | 100%      | Dengue virus 4 | ELISPOT     | IFN $\gamma$ release | Positive     | 1 | 1 | 1 | 0 | 0 | 0 |
| 539687  | MPFLVMAWRTIMAVLF       | NS2a | 1284 | 1298 | HLA-DRB1*12:02            | 100%      | Dengue virus 4 | ELISPOT     | IFN $\gamma$ release | Positive     | 1 | 1 | 1 | 0 | 0 | 0 |
| 539937  | STMPFLVMAWRTIMAV       | NS2a | 1282 | 1296 | HLA-DRB1*13:01            | 100%      | Dengue virus 4 | ELISPOT     | IFN $\gamma$ release | Positive     | 1 | 1 | 1 | 0 | 0 | 0 |
| 728742  | ELCRRRTYRKHMLLV        | NS2a | 1147 | 1161 | HLA-DRB1*14:02            | 100%      | Dengue virus 4 | ELISPOT     | IFN $\gamma$ release | Positive     | 1 | 1 | 1 | 0 | 0 | 0 |
| 867100  | HWQALQ03:01/DQB1*03:02 | NS2a | 1316 | 1330 | HLA-DQA1*03:01/DQB1*03:02 | 100%      | Dengue virus 4 | ELISPOT     | IFN $\gamma$ release | Positive     | 1 | 1 | 1 | 0 | 0 | 0 |
| 195511  | IMAYGLVSLGSAII         | NS2b | 1352 | 1366 | HLA-DRB1*01:01            | 100%      | Dengue virus 4 | ELISPOT     | IFN $\gamma$ release | Positive     | 1 | 1 | 1 | 0 | 0 | 0 |
| 195662  | LLLAAYVWSSGSAADI       | NS2b | 1381 | 1395 | HLA-DRB1*04:01            | 100%      | Dengue virus 4 | ELISPOT     | IFN $\gamma$ release | Positive     | 1 | 1 | 1 | 0 | 0 | 0 |
| 196082  | TNMTITLVKALUVT         | NS2b | 1436 | 1450 | HLA-DRB1*08:02            | 100%      | Dengue virus 4 | ELISPOT     | IFN $\gamma$ release | Positive     | 1 | 1 | 1 | 0 | 0 | 0 |
| 869635  | VTMTLVWYMWQVQTKOR      | NS2b | 1460 | 1474 | HLA-DRB1*01:01            | 100%      | Dengue virus 4 | ELISPOT     | IFN $\gamma$ release | Positive     | 1 | 1 | 1 | 0 | 0 | 0 |
| 1067119 | KGVLGYLNGSVVTKS        | NS3  | 1618 | 1632 | HLA-DRB1*15:01            | 100%      | Dengue virus 4 | ELISPOT     | IFN $\gamma$ release | Positive     | 1 | 1 | 1 | 0 | 0 | 0 |
| 12605   | EIVDLMCHAT             | NS3  | 255  | 264  | HLA-DPw2                  | 100%      | Dengue virus 4 | 51 chromium | cytotoxicity         | Positive     | 1 | 1 | 1 | 0 | 0 | 0 |
| 156711  | LAPTRVVAAMEEAL         | NS3  | 1695 | 1709 | HLA class II              | 100%      | Dengue virus 4 | 51 chromium | cytotoxicity         | Positive     | 1 | 1 | 1 | 0 | 0 | 0 |
| 195298  | FHTMWVHVTVSGVICH       | NS3  | 1520 | 1534 | HLA-DRB1*07:01            | 100%      | Dengue virus 4 | ELISPOT     | IFN $\gamma$ release | Positive     | 1 | 1 | 1 | 0 | 0 | 0 |
| 195583  | KGVGLGYLNGSVVTK        | NS3  | 5    | 19   | HLA-DRB1*15:01            | 100%      | Dengue virus 4 | ELISPOT     | IFN $\gamma$ release | Positive     | 1 | 1 | 1 | 0 | 0 | 0 |
| 195695  | LPWVLSYKVASAGIS        | NS3  | 2016 | 2030 | HLA-DRB1*08:02            | 100%      | Dengue virus 4 | ELISPOT     | IFN $\gamma$ release | Positive     | 1 | 1 | 1 | 0 | 0 | 0 |
| 195838  | PNNVLVMDNEAHTFD        | NS3  | 1750 | 1764 | HLA-DRB1*03:01            | 100%      | Dengue virus 4 | ELISPOT     | IFN $\gamma$ release | Positive     | 1 | 1 | 1 | 0 | 0 | 0 |
| 331912  | KRLTIMDLHPGAGKT        | NS3  | 186  | 200  | HLA class II              | 100%      | Dengue virus 4 | ICS         | IFN $\gamma$ release | Positive     | 1 | 1 | 1 | 0 | 0 | 0 |
| 539024  | AAAFMTATPGTDT          | NS3  | 1783 | 1797 | HLA-DRB1*04:03            | 100%      | Dengue virus 4 | ELISPOT     | IFN $\gamma$ release | Positive     | 0 | 0 | 0 | 0 | 0 | 0 |
| 539080  | ALRGLPIRQYPAVK         | NS3  | 96   | 110  | HLA-DRB1*13:01            | 100%      | Dengue virus 4 | ELISPOT     | IFN $\gamma$ release | Positive     | 1 | 1 | 1 | 0 | 0 | 0 |
| 539359  | GVHTMTLVKTSRGTGI       | NS3  | 1518 | 1532 | HLA-DRB1*08:03            | 100%      | Dengue virus 4 | ELISPOT     | IFN $\gamma$ release | Positive     | 1 | 1 | 1 | 0 | 0 | 0 |
| 539520  | KYGLGYNGVYKSG          | NS3  | 7    | 21   | HLA-DRB1*15:06            | 100%      | Dengue virus 4 | ELISPOT     | IFN $\gamma$ release | Positive     | 1 | 1 | 1 | 0 | 0 | 0 |
| 539803  | QKGTVWPVPSKAGN         | NS3  | 1829 | 1843 | HLA-DRB1*08:03            | 100%      | Dengue virus 4 | ELISPOT     | IFN $\gamma$ release | Positive     | 1 | 1 | 1 | 0 | 0 | 0 |
| 68977   | VIGLYNGV               | NS3  | 146  | 154  | HLA-DRB1*15:01            | 100%      | Dengue virus 4 | 51 chromium | cytotoxicity         | Positive     | 1 | 1 | 1 | 0 | 0 | 0 |
| 863140  | TRVEMGEAAAFIMTA        | NS3  | 1776 | 1790 | HLA-DQA1*03:01/DQB1*03:02 | 100%      | Dengue virus 4 | ELISPOT     | IFN $\gamma$ release | Positive     | 1 | 1 | 1 | 0 | 0 | 0 |
| 867453  | KLTDWDFVPTTDTSE        | NS3  | 1872 | 1886 | HLA-DQA1*03:01/DQB1*03:02 | 100%      | Dengue virus 4 | ELISPOT     | IFN $\gamma$ release | Positive     | 1 | 1 | 1 | 0 | 0 | 0 |
| 167758  | ILTEIASLPYLSRAKL       | NS4a | 6    | 23   | HLA-DP                    | 100%      | Dengue virus 4 | ELISPOT     | IFN $\gamma$ release | Positive     | 1 | 1 | 1 | 0 | 0 | 0 |
| 195176  | ASLPYLSYLSRAKL         | NS4a | 2103 | 2117 | HLA-DRB1*07:01            | 100%      | Dengue virus 4 | ELISPOT     | IFN $\gamma$ release | Positive     | 1 | 1 | 1 | 0 | 0 | 0 |
| 195224  | DNLGLVILTLITI          | NS4a | 2223 | 2237 | HLA-DRB1*15:01            | 100%      | Dengue virus 4 | ELISPOT     | IFN $\gamma$ release | Positive     | 1 | 1 | 1 | 0 | 0 | 0 |
| 195809  | NQLTVLITLITIG          | NS4a | 2224 | 2238 | HLA-DRB1*08:02            | 100%      | Dengue virus 4 | ELISPOT     | IFN $\gamma$ release | Positive     | 1 | 1 | 1 | 0 | 0 | 0 |
| 195876  | RAKLADLNIVMLHTT        | NS4a | 2112 | 2126 | HLA-DRB1*03:01            | 100%      | Dengue virus 4 | ELISPOT     | IFN $\gamma$ release | Positive     | 1 | 1 | 1 | 0 | 0 | 0 |
| 539185  | DILTEIASLPYLS          | NS4a | 2097 | 2111 | HLA-DRB1*04:07            | 100%      | Dengue virus 4 | ELISPOT     | IFN $\gamma$ release | Positive     | 1 | 1 | 1 | 0 | 0 | 0 |
| 539313  | KGAYHAIHELPELI         | NS4a | 2130 | 2144 | HLA-DRB1*10:01            | 100%      | Dengue virus 4 | ELISPOT     | IFN $\gamma$ release | Positive     | 0 | 0 | 0 | 0 | 0 | 0 |
| 539631  | LTIASLPYLSSSRA         | NS4a | 2059 | 2113 | HLA-DRB1*04:03            | 100%      | Dengue virus 4 | ELISPOT     | IFN $\gamma$ release | Positive     | 1 | 1 | 1 | 0 | 0 | 0 |
| 728568  | ANQADRELIELT           | NS4a | 2132 | 2146 | HLA-DRB1*04:07            | 100%      | Dengue virus 4 | ELISPOT     | IFN $\gamma$ release | Positive     | 1 | 1 | 1 | 0 | 0 | 0 |
| 866951  | SLPTYSLSRAKLAD         | NS4a | 2103 | 2117 | HLA-DRB1*02:02            | 100%      | Dengue virus 4 | ELISPOT     | IFN $\gamma$ release | Positive     | 1 | 1 | 1 | 0 | 0 | 0 |
| 195377  | ASLWMLVHYAIGP          | NS4b | 2348 | 2362 | HLA-DRB1*13:01            | 100%      | Dengue virus 4 | ELISPOT     | IFN $\gamma$ release | Positive     | 1 | 0 | 1 | 0 | 0 | 0 |
| 195219  | DELPISYPKFEKQL         | NS4b | 2393 | 2407 | HLA-DRB1*03:01            | 100%      | Dengue virus 4 | ELISPOT     | IFN $\gamma$ release | Positive     | 1 | 1 | 1 | 0 | 0 | 0 |
| 195276  | ETITLDVLRPASAW         | NS4b | 2263 | 2277 | HLA-DRB1*03:01            | 100%      | Dengue virus 4 | ELISPOT     | IFN $\gamma$ release | Positive     | 1 | 1 | 1 | 0 | 0 | 0 |
| 195592  | KTETITLDVLRPAS         | NS4b | 2261 | 2275 | HLA-DRB1*03:01            | 100%      | Dengue virus 4 | ELISPOT     | IFN $\gamma$ release | Positive     | 1 | 1 | 1 | 0 | 0 | 0 |
| 195616  | LCAGDLMLKRTTWAF        | NS4b | 2415 | 2429 | HLA-DRB1*04:01            | 100%      | Dengue virus 4 | ELISPOT     | IFN $\gamma$ release | Positive     | 1 | 1 | 1 | 0 | 0 | 0 |
| 195720  | LTASLVMLVHYAI          | NS4b | 2346 | 2360 | HLA-DRB1*12:02            | 100%      | Dengue virus 4 | ELISPOT     | IFN $\gamma$ release | Positive     | 1 | 0 | 1 | 0 | 0 | 0 |
| 196048  | TILDVLRPASAWTL         | NS4b | 2265 | 2279 | HLA-DRB1*03:01            | 100%      | Dengue virus 4 | ELISPOT     | IFN $\gamma$ release | Positive     | 1 | 1 | 1 | 0 | 0 | 0 |
| 196208  | WAFCEVLATGPILP         | NS4b | 2427 | 2441 | HLA-DRB1*07:01            | 100%      | Dengue virus 4 | ELISPOT     | IFN $\gamma$ release | Positive     | 1 | 1 | 1 | 0 | 0 | 0 |
| 196226  | WTLYAVATITLPTML        | NS4b | 2277 | 2291 | HLA-DRB1*07:01            | 100%      | Dengue virus 4 | ELISPOT     | IFN $\gamma$ release | Positive     | 1 | 1 | 1 | 0 | 0 | 0 |
| 539057  | AGQLLMRTTWAFCE         | NS4b | 2417 | 2431 | HLA-DRB1*13:01            | 100%      | Dengue virus 4 | ELISPOT     | IFN $\gamma$ release | Positive     | 1 | 1 | 1 | 0 | 0 | 0 |
| 539185  | DVLRPASAWTLVAV         | NS4b | 2268 | 2282 | HLA-DRB1*09:01            | 100%      | Dengue virus 4 | ELISPOT     | IFN $\gamma$ release | Positive     | 1 | 1 | 1 | 0 | 0 | 0 |
| 539639  | LWYHAIAGPLQAKA         | NS4b | 2354 | 2368 | HLA-DQA1*05:01/DQB1*02:01 | 100%      | Dengue virus 4 | ELISPOT     | IFN $\gamma$ release | Positive     | 1 | 0 | 1 | 0 | 0 | 0 |
| 729202  | ILDVLRPASAWTLV         | NS4b | 2266 | 2280 | HLA-DRB1*01:02            | 100%      | Dengue virus 4 | ELISPOT     | IFN $\gamma$ release | Positive     | 1 | 1 | 1 | 0 | 0 | 0 |
| 1060543 | ACLGKAYAGVWVLMY        | NS5  | 3240 | 3254 | HLA-DRB1*04:01            | 100%      | Dengue virus 4 | ELISPOT     | IFN $\gamma$ release | Positive-Low | 1 | 1 | 1 | 0 | 0 | 0 |
| 195735  | EFIFSKVRSNAIGA         | NS5  | 2884 | 2898 | HLA-DRB1*08:02            | 100%      | Dengue virus 4 | ELISPOT     | IFN $\gamma$ release | Positive     | 1 | 1 | 1 | 0 | 0 | 0 |
| 195240  | EYDYMPVMKRYSA          | NS5  | 3365 | 3379 | HLA-DRB1*11:01            | 100%      | Dengue virus 4 | ELISPOT     | IFN $\gamma$ release | Positive     | 1 | 1 | 1 | 0 | 0 | 0 |
| 195279  | EYDYMPVMKRYSA          | NS5  | 3366 | 3380 | HLA-DRB1*11:01            | 100%      | Dengue virus 4 | ELISPOT     | IFN $\gamma$ release | Positive     | 1 | 1 | 1 | 0 | 0 | 0 |
| 195737  | LWCGSLGLSSRAWT         | NS5  | 3333 | 3347 | HLA-DRB1*11:01            | 100%      | Dengue virus 4 | ELISPOT     | IFN $\gamma$ release | Positive     | 1 | 1 | 1 | 0 | 0 | 0 |
| 195815  | NRWIEDNPMMTDKT         | NS5  | 3302 | 3316 | HLA-DRB1*03:01            | 100%      | Dengue virus 4 | ELISPOT     | IFN $\gamma$ release | Positive     | 1 | 1 | 1 | 0 | 0 | 0 |
| 195823  | NWLWALLGKKKNPLR        | NS5  | 2866 | 2880 | HLA-DRB1*14:02            | 100%      | Dengue virus 4 | ELISPOT     | IFN $\gamma$ release | Positive     | 1 | 1 | 1 | 0 | 0 | 0 |
| 195858  | QMWSLVMFYHRDLRL        | NS5  | 3248 | 3262 | HLA-DRB1*15:01            | 100%      | Dengue virus 4 | ELISPOT     | IFN $\gamma$ release | Positive     | 1 | 1 | 1 | 0 | 0 | 0 |
| 195879  | REFESKVRNSAIGA         | NS5  | 2883 | 2897 | HLA-DRB1*04:01            | 100%      | Dengue virus 4 | ELISPOT     | IFN $\gamma$ release | Positive     | 1 | 1 | 1 | 0 | 0 | 0 |
| 196105  | VDYMPVMKRYSAFFE        | NS5  | 3368 | 3382 | HLA-DRB1*11:01            | 100%      | Dengue virus 4 | ELISPOT     | IFN $\gamma$ release | Positive     | 0 | 0 | 0 | 0 | 0 | 0 |
| 196230  | YQAWWVSLMYFHRDL        | NS5  | 3246 | 3260 | HLA-DRB1*15:01            | 100%      | Dengue virus 4 | ELISPOT     | IFN $\gamma$ release | Positive     | 1 | 1 | 1 | 0 | 0 | 0 |
| 539281  | FEYKRSGLVEDRT          | NS5  | 2512 | 2526 | HLA-DRB1*09:01            | 100%      | Dengue virus 4 | ELISPOT     | IFN $\gamma$ release | Positive     | 1 | 1 | 1 | 0 | 0 | 0 |
| 539553  | LGEFGRAKGSRAIY         | NS5  | 2949 | 2963 | HLA-DRB1*09:01            | 100%      | Dengue virus 4 | ELISPOT     | IFN $\gamma$ release | Positive     | 1 | 1 | 1 | 0 | 0 | 0 |
| 539656  | MAISGDDCVVPLDERF       | NS5  | 3164 | 3162 | HLA class II              | 100%      | Dengue virus 4 | ICS         | IFN $\gamma$ release | Positive     | 1 | 1 | 1 | 0 | 0 | 0 |
| 195970  | MYTGLAMTDITPFQGR       | NS5  | 3824 | 3840 | HLA class II              | 100%      | Dengue virus 4 | ICS         | IFN $\gamma$ release | Positive     | 1 | 1 | 1 | 0 | 0 | 0 |
| 196210  | PHKVLKAKKELTY          | NS5  | 3046 | 3060 | HLA-DRB1*12:02            | 100%      | Dengue virus 4 | ELISPOT     | IFN $\gamma$ release | Positive     | 1 | 1 | 1 | 0 | 0 | 0 |
| 540043  | VGTYGLNTTMMVEQ         | NS5  | 3091 | 3105 | HLA-DRB1*15:06            | 100%      | Dengue virus 4 | ELISPOT     | IFN $\gamma$ release | Positive     | 1 | 1 | 1 | 0 | 0 | 0 |
| 866633  | ESCVNMMGKREKLI         | NS5  | 2935 | 2949 | HLA-DRB5*01:01            | 100%      | Dengue virus 4 | ELISPOT     | IFN $\gamma$ release | Positive     | 1 | 1 | 1 | 0 | 0 | 0 |
| 866838  | RDLRLASMAICSAVP        | NS5  | 3258 | 3272 | HLA-DQA1*01:02/DQB1*06:02 | 100%      | Dengue virus 4 | ELISPOT     | IFN $\gamma$ release | Positive     | 1 | 1 | 1 | 0 | 0 | 0 |
| 539898  | SGKGPLRMVLAFTF         | C    | 18   | 32   | HLA-DRB1*15:06            | 81% <100% | Dengue virus 4 | ELISPOT     | IFN $\gamma$ release | Positive     | 1 | 1 | 1 | 0 | 0 | 0 |
| 730959  | GRMLNLNGRKRSTI         | C    | 88   | 102  | HLA-DRB1*14:06            | 81% <100% | Dengue virus 4 | ELISPOT     | IFN $\gamma$ release | Positive     | 1 | 1 | 1 | 0 | 0 | 0 |
| 539463  | KERIMVTFKVPHAKRQ       | E    | 513  | 527  | HLA-DRB1*04:03            | 81% <100% | Dengue virus 4 | ELISPOT     | IFN $\gamma$ release | Positive     | 1 | 1 | 1 | 1 | 1 | 1 |
| 540080  | VRLIGFLVLWIGTN         | E    | 455  | 469  | HLA-DRB1*15:06            | 81% <100% | Dengue virus 4 | ELISPOT     | IFN $\gamma$ release | Positive     | 0 | 0 | 0 | 1 | 0 | 1 |
| 195822  | NVMWVQITNELNVL         | NS1  | 1    | 15   | HLA-DRB1*04:07            | 81% <100% | Dengue virus 4 | ELISPOT     | IFN $\gamma$ release | Positive     | 1 | 1 | 1 | 0 | 0 | 0 |
| 867043  | HADMVGVWIESKNGT        | NS1  | 969  | 983  | HLA-DQA1*01:01/DQB1*05:01 | 81% <100% | Dengue virus 4 | ELISPOT     | IFN $\gamma$ release | Positive     | 1 | 1 | 1 | 0 | 0 | 0 |
| 195771  | KHMLVTVTTLCAL          | NS2a | 1156 | 1170 | HLA-DRB1*08:02            | 81% <100% | Dengue virus 4 | ELISPOT     | IFN $\gamma$ release | Positive     | 0 | 0 | 0 | 0 | 0 | 0 |
| 195404  | GLVSLGSAIIKNDV         | NS2b | 9    | 23   | HLA-DRB1*01:02            | 81% <100% | Dengue virus 4 | ELISPOT     | IFN $\gamma$ release | Positive     | 1 | 1 | 1 | 0 | 0 | 0 |
| 195748  | MAVGLVSLGSAIIK         | NS2b | 1353 | 1367 | HLA-DRB1*01:01            | 81% <100% | Dengue virus 4 | ELISPOT     | IFN $\gamma$ release | Positive     | 1 | 1 | 1 | 0 | 0 | 0 |
| 195931  | SALKNLMDPLPAGFV        | NS2b | 1363 | 1377 | HLA-DRB1*03:01            | 81% <100% | Dengue virus 4 | ELISPOT     | IFN $\gamma$ release | Positive     | 1 | 1 | 1 | 0 | 0 | 0 |
| 539101  | AKVGLVSLGSAIIK         | NS2b | 1354 | 1368 | HLA-DRB1*12:02            | 81% <100% | Dengue virus 4 | ELISPOT     | IFN $\gamma$ release | Positive     | 1 | 1 | 1 | 0 | 0 | 0 |
| 1392192 | GREIVDLMTCHATTFT       | NS3  | 1727 | 1741 | HLA-DRB1*10:01            | 81% <100% | Dengue virus   |             |                      |              |   |   |   |   |   |   |



|        |                 |      |      |      |                           |           |                |         |              |          |   |   |   |   |   |   |
|--------|-----------------|------|------|------|---------------------------|-----------|----------------|---------|--------------|----------|---|---|---|---|---|---|
| 196252 | YVLGIFLRKLTRET  | NS2a | 1212 | 1226 | HLA-DRB1*11:01            | >0% - 50% | Dengue virus 4 | ELISPOT | IFNg release | Positive | 0 | 0 | 0 | 0 | 0 | 0 |
| 539555 | LGIFLRKLTRETAL  | NS2a | 1214 | 1228 | HLA-DRB1*08:03            | >0% - 50% | Dengue virus 4 | ELISPOT | IFNg release | Positive | 0 | 0 | 0 | 0 | 0 | 0 |
| 740701 | VVTLPICRTSCLQK  | NS2a | 1299 | 1313 | HLA-DRB1*11:04            | >0% - 50% | Dengue virus 4 | ELISPOT | IFNg release | Positive | 1 | 1 | 1 | 0 | 0 | 0 |
| 867048 | HDLMEFIDGISGLI  | NS2a | 1243 | 1257 | HLA-DQA1*01:01/DQB1*05:01 | >0% - 50% | Dengue virus 4 | ELISPOT | IFNg release | Positive | 0 | 0 | 0 | 0 | 0 | 0 |
| 740013 | QLIRQMEAEGVITQD | NS5  | 3105 | 3119 | HLA-DRB1*01:02            | >0% - 50% | Dengue virus 4 | ELISPOT | IFNg release | Positive | 1 | 1 | 1 | 0 | 0 | 0 |



## CD8 DENV-1 Epitopes

| Epitope_ID | AA_Seq           | Protein_Name | Start | End  | Allele      | Step      | Serotype       | Method/Technique                         | Assay_Group  | Qualitative_Measure   | DENV-1 constructs of vaccines (100% identity=1, green; else 0, red) |      |      |           |        |      |
|------------|------------------|--------------|-------|------|-------------|-----------|----------------|------------------------------------------|--------------|-----------------------|---------------------------------------------------------------------|------|------|-----------|--------|------|
|            |                  |              |       |      |             |           |                |                                          |              |                       | TV003                                                               | TDEN | DPV1 | Dengvaxia | DENVax | TVDV |
| 184844     | MLKRRNRV         | C            | 15    | 23   | HLA-B*08:01 | 0%        | Dengue virus 1 | ELISPOT                                  | IFNγ release | Positive              | 0                                                                   | 0    | 0    | 0         | 0      | 0    |
| 240082     | MVLAITFL         | C            | 24    | 32   | HLA-A*02:01 | 0%        | Dengue virus 1 | ELISPOT                                  | IFNγ release | Positive              | 0                                                                   | 0    | 0    | 0         | 0      | 0    |
| 180641     | MALISVLF         | NS2a         | 1297  | 1305 | HLA-B*51:01 | 0%        | Dengue virus 1 | ELISPOT                                  | IFNγ release | Positive              | 0                                                                   | 0    | 0    | 0         | 0      | 0    |
| 419037     | RPMFAVGILF       | NS2a         | 1211  | 1220 | HLA-B*35:01 | 0%        | Dengue virus 1 | ELISPOT                                  | IFNγ release | Positive              | 0                                                                   | 0    | 0    | 0         | 0      | 0    |
| 150254     | PLVAGGLL         | NS2b         | 1375  | 1383 | HLA-B*07:02 | 0%        | Dengue virus 1 | ELISPOT                                  | IFNγ release | Positive              | 0                                                                   | 0    | 0    | 0         | 0      | 0    |
| 180682     | NPEIEDIF         | NS3          | 1650  | 1658 | HLA-B*35:01 | 0%        | Dengue virus 1 | ELISPOT                                  | IFNγ release | Positive              | 0                                                                   | 0    | 0    | 0         | 0      | 0    |
| 32147      | KLRTLVLAPTRVVAS  | NS3          | 216   | 230  | HLA class I | 0%        | Dengue virus 1 | ELISPOT                                  | IFNγ release | Positive              | 1                                                                   | 1    | 1    | 0         | 0      | 0    |
| 539750     | NVRTLAPTRVASEM   | NS3          | 1690  | 1706 | HLA class I | 0%        | Dengue virus 1 | ICS                                      | IFNγ release | Positive              | 0                                                                   | 0    | 0    | 0         | 0      | 0    |
| 65549      | TEPGIIPSM        | NS3          | 1975  | 1983 | HLA-B*53:01 | 0%        | Dengue virus 1 | 51 chromium<br>cytotoxicity              | Positive     | 0                     | 0                                                                   | 0    | 0    | 0         | 0      | 0    |
| 150674     | TVMDIISR         | NS5          | 3080  | 3088 | HLA-A*11:01 | 0%        | Dengue virus 1 | multimer/tetramer<br>qualitative binding | Positive     | 0                     | 0                                                                   | 0    | 0    | 0         | 0      | 0    |
| 184787     | MEVQLVRQM        | NS5          | 3107  | 3115 | HLA-B*40:01 | 0%        | Dengue virus 1 | ELISPOT                                  | IFNγ release | Positive              | 0                                                                   | 0    | 0    | 0         | 0      | 0    |
| 150378     | LLMLVTPSM        | PreM         | 271   | 279  | HLA-B*08:01 | 100%      | Dengue virus 1 | ELISPOT                                  | IFNγ release | Positive              | 1                                                                   | 1    | 1    | 0         | 1      | 1    |
| 185893     | TEVTNPAVL        | E            | 329   | 337  | HLA-B*40:01 | 100%      | Dengue virus 1 | ELISPOT                                  | IFNγ release | Positive              | 1                                                                   | 1    | 1    | 1         | 1      | 1    |
| 186551     | YENLKYSVIV       | E            | 412   | 421  | HLA-B*40:01 | 100%      | Dengue virus 1 | ELISPOT                                  | IFNγ release | Positive              | 1                                                                   | 1    | 1    | 1         | 1      | 1    |
| 50596      | QEGAMHTAL        | E            | 536   | 544  | HLA-A*02:01 | 100%      | Dengue virus 1 | ELISPOT                                  | IFNγ release | Positive              | 1                                                                   | 1    | 1    | 1         | 1      | 1    |
| 150258     | GPWHLGKLEL       | NS1          | 1041  | 1050 | HLA-B*07:02 | 100%      | Dengue virus 1 | ELISPOT                                  | IFNγ release | Positive              | 1                                                                   | 1    | 1    | 0         | 0      | 0    |
| 183246     | FRRLTSREVL       | NS2a         | 1220  | 1229 | HLA-B*08:01 | 100%      | Dengue virus 1 | ELISPOT                                  | IFNγ release | Positive              | 1                                                                   | 1    | 1    | 0         | 0      | 0    |
| 184274     | LALMATKFM        | NS2a         | 1202  | 1210 | HLA-B*35:01 | 100%      | Dengue virus 1 | ELISPOT                                  | IFNγ release | Positive              | 0                                                                   | 0    | 0    | 0         | 0      | 0    |
| 184856     | MLMTGTLAVF       | NS2a         | 1158  | 1167 | HLA-B*35:01 | 100%      | Dengue virus 1 | ELISPOT                                  | IFNγ release | Positive              | 1                                                                   | 1    | 1    | 0         | 0      | 0    |
| 13346      | EMAEALKGMPRIYQT  | NS3          | 231   | 245  | HLA class I | 100%      | Dengue virus 1 | ELISPOT                                  | IFNγ release | Positive              | 1                                                                   | 1    | 1    | 0         | 0      | 0    |
| 150341     | KPGTSGSPI        | NS3          | 1606  | 1614 | HLA-B*07:02 | 100%      | Dengue virus 1 | ELISPOT                                  | IFNγ release | Positive              | 1                                                                   | 1    | 1    | 0         | 0      | 0    |
| 150538     | RRRWLDART        | NS3          | 2068  | 2076 | HLA-B*07:02 | 100%      | Dengue virus 1 | ELISPOT                                  | IFNγ release | Positive              | 1                                                                   | 1    | 1    | 0         | 0      | 0    |
| 180472     | GEARKTFVEL       | NS3          | 2003  | 2012 | HLA-B*40:01 | 100%      | Dengue virus 1 | ELISPOT                                  | IFNγ release | Positive              | 1                                                                   | 1    | 1    | 0         | 0      | 0    |
| 180804     | VPNYNMIIM        | NS3          | 1751  | 1759 | HLA-B*51:01 | 100%      | Dengue virus 1 | ELISPOT                                  | IFNγ release | Positive              | 1                                                                   | 1    | 1    | 0         | 0      | 0    |
| 183229     | FPQSNVAIQD       | NS3          | 1801  | 1810 | HLA-B*35:01 | 100%      | Dengue virus 1 | ELISPOT                                  | IFNγ release | Positive              | 1                                                                   | 1    | 1    | 0         | 0      | 0    |
| 183598     | HPGSGKTRRY       | NS3          | 1670  | 1679 | HLA-B*35:01 | 100%      | Dengue virus 1 | ELISPOT                                  | IFNγ release | Positive              | 1                                                                   | 1    | 1    | 0         | 0      | 0    |
| 184316     | LEENMDVEIV       | NS3          | 2049  | 2058 | HLA-B*44:03 | 100%      | Dengue virus 1 | ELISPOT                                  | IFNγ release | Positive              | 1                                                                   | 1    | 1    | 0         | 0      | 0    |
| 184884     | MPRIYQTAV        | NS3          | 1714  | 1723 | HLA-B*35:01 | 100%      | Dengue virus 1 | ELISPOT                                  | IFNγ release | Positive              | 1                                                                   | 1    | 1    | 0         | 0      | 0    |
| 185741     | SPVRVPNYNM       | NS3          | 1747  | 1756 | HLA-B*35:01 | 100%      | Dengue virus 1 | ELISPOT                                  | IFNγ release | Positive              | 1                                                                   | 1    | 1    | 0         | 0      | 0    |
| 185827     | SVKVASEGF        | NS3          | 2023  | 2031 | HLA-A*24:02 | 100%      | Dengue virus 1 | ELISPOT                                  | IFNγ release | Positive              | 1                                                                   | 1    | 1    | 0         | 0      | 0    |
| 186284     | VLDGGIYRI        | NS3          | 1492  | 1500 | HLA-A*02:01 | 100%      | Dengue virus 1 | ELISPOT                                  | IFNγ release | Positive              | 1                                                                   | 1    | 1    | 0         | 0      | 0    |
| 186559     | YKVASGFCQY       | NS3          | 2024  | 2033 | HLA-B*35:01 | 100%      | Dengue virus 1 | ELISPOT                                  | IFNγ release | Positive              | 1                                                                   | 1    | 1    | 0         | 0      | 0    |
| 23825      | GTSGSPIVNR       | NS3          | 133   | 142  | HLA-B*57:01 | 100%      | Dengue virus 1 | 51 chromium<br>cytotoxicity              | Positive     | 1                     | 1                                                                   | 1    | 0    | 0         | 0      | 0    |
| 38766      | LPVNLISKVY       | NS3          | 2018  | 2026 | HLA-B*51:01 | 100%      | Dengue virus 1 | ELISPOT                                  | IFNγ release | Positive              | 1                                                                   | 1    | 1    | 0         | 0      | 0    |
| 39095      | LRGEARKTFVELMRR  | NS3          | 536   | 540  | HLA class I | 100%      | Dengue virus 1 | ELISPOT                                  | IFNγ release | Positive              | 1                                                                   | 1    | 1    | 0         | 0      | 0    |
| 419032     | NMIIMDEAHF       | NS3          | 1755  | 1764 | HLA-B*15:01 | 100%      | Dengue virus 1 | ELISPOT                                  | IFNγ release | Positive              | 1                                                                   | 1    | 1    | 0         | 0      | 0    |
| 56309      | RVIDPRCL         | NS3          | 1897  | 1905 | HLA-B*07:02 | 100%      | Dengue virus 1 | ELISPOT                                  | IFNγ release | Positive              | 1                                                                   | 1    | 1    | 0         | 0      | 0    |
| 150649     | TPQDNQLAYV       | NS4a         | 2222  | 2231 | HLA-B*07:02 | 100%      | Dengue virus 1 | ELISPOT                                  | IFNγ release | Positive              | 1                                                                   | 1    | 1    | 0         | 0      | 0    |
| 180780     | TPQDNQLAY        | NS4a         | 2222  | 2230 | HLA-B*35:01 | 100%      | Dengue virus 1 | ELISPOT                                  | IFNγ release | Positive              | 1                                                                   | 1    | 1    | 0         | 0      | 0    |
| 184522     | LPDTITML         | NS4a         | 2142  | 2150 | HLA-B*35:01 | 100%      | Dengue virus 1 | ELISPOT                                  | IFNγ release | Positive              | 1                                                                   | 1    | 1    | 0         | 0      | 0    |
| 184523     | LPDTITML         | NS4a         | 2142  | 2151 | HLA-B*35:01 | 100%      | Dengue virus 1 | ELISPOT                                  | IFNγ release | Positive              | 1                                                                   | 1    | 1    | 0         | 0      | 0    |
| 419128     | AYRHAMEEL        | NS4a         | 2134  | 2142 | HLA-A*24:02 | 100%      | Dengue virus 1 | ELISPOT                                  | IFNγ release | Positive-High         | 1                                                                   | 1    | 1    | 0         | 0      | 0    |
| 41986      | MLLALIAVL        | NS4a         | 2150  | 2158 | HLA-A2      | 100%      | Dengue virus 1 | ICS                                      | IFNγ release | Positive              | 1                                                                   | 1    | 1    | 0         | 0      | 0    |
| 150474     | NPLTLTAAV        | NS4b         | 2348  | 2356 | HLA-B*07:02 | 100%      | Dengue virus 1 | ELISPOT                                  | IFNγ release | Positive              | 1                                                                   | 1    | 1    | 0         | 0      | 0    |
| 186427     | VYVDKAEF         | NS4b         | 2403  | 2411 | HLA-A*11:01 | 100%      | Dengue virus 1 | ELISPOT                                  | IFNγ release | Positive              | 1                                                                   | 1    | 1    | 0         | 0      | 0    |
| 27180      | ILLMRTTWA        | NS4b         | 2426  | 2434 | HLA-A2      | 100%      | Dengue virus 1 | ICS                                      | IFNγ release | Positive              | 1                                                                   | 1    | 1    | 0         | 0      | 0    |
| 41093      | MANIFRGSY        | NS4b         | 2466  | 2474 | HLA-B*35:01 | 100%      | Dengue virus 1 | ELISPOT                                  | IFNγ release | Positive              | 1                                                                   | 1    | 1    | 0         | 0      | 0    |
| 69652      | VLMILVAHYA       | NS4b         | 2356  | 2364 | HLA-A2      | 100%      | Dengue virus 1 | ICS                                      | IFNγ release | Positive              | 1                                                                   | 1    | 1    | 0         | 0      | 0    |
| 74558      | YLAGAGLAF        | NS4b         | 2474  | 2482 | HLA-B*07:02 | 100%      | Dengue virus 1 | ELISPOT                                  | IFNγ release | Positive              | 1                                                                   | 1    | 1    | 0         | 0      | 0    |
| 133702     | SRNSTHEMY        | NS5          | 2703  | 2711 | HLA-A*02:01 | 100%      | Dengue virus 1 | ELISPOT                                  | IFNγ release | Positive              | 1                                                                   | 1    | 1    | 0         | 0      | 0    |
| 14325      | ETACLGSXY        | NS5          | 3242  | 3250 | HLA-A*26:01 | 100%      | Dengue virus 1 | ELISPOT                                  | IFNγ release | Positive              | 1                                                                   | 1    | 1    | 0         | 0      | 0    |
| 180548     | KAKSGRAIW        | NS5          | 2959  | 2967 | HLA-B*57:01 | 100%      | Dengue virus 1 | ELISPOT                                  | IFNγ release | Positive              | 1                                                                   | 1    | 1    | 0         | 0      | 0    |
| 182599     | AQMWWQLMYF       | NS5          | 3251  | 3259 | HLA-B*15:01 | 100%      | Dengue virus 1 | ELISPOT                                  | IFNγ release | Positive              | 1                                                                   | 1    | 1    | 0         | 0      | 0    |
| 183147     | FSCHHFFHL        | NS5          | 3200  | 3208 | HLA-B*08:01 | 100%      | Dengue virus 1 | ELISPOT                                  | IFNγ release | Positive              | 1                                                                   | 1    | 1    | 0         | 0      | 0    |
| 183828     | IPMVTQIAM        | NS5          | 2827  | 2835 | HLA-B*07:02 | 100%      | Dengue virus 1 | ELISPOT                                  | IFNγ release | Positive              | 1                                                                   | 1    | 1    | 0         | 0      | 0    |
| 184898     | MQRKHGGMIL       | NS5          | 2689  | 2697 | HLA-B*08:01 | 100%      | Dengue virus 1 | ELISPOT                                  | IFNγ release | Positive              | 1                                                                   | 1    | 1    | 0         | 0      | 0    |
| 184956     | MTTEDMLSVW       | NS5          | 3296  | 3305 | HLA-B*58:01 | 100%      | Dengue virus 1 | ICS                                      | IFNγ release | Positive              | 1                                                                   | 1    | 1    | 0         | 0      | 0    |
| 185279     | QMQRKHGGMIL      | NS5          | 2688  | 2697 | HLA-B*08:01 | 100%      | Dengue virus 1 | ELISPOT                                  | IFNγ release | Positive              | 1                                                                   | 1    | 1    | 0         | 0      | 0    |
| 185354     | REVVPCRNQ        | NS5          | 3214  | 3223 | HLA-B*40:01 | 100%      | Dengue virus 1 | ELISPOT                                  | IFNγ release | Positive              | 1                                                                   | 1    | 1    | 0         | 0      | 0    |
| 186150     | TVMDVISRR        | NS5          | 3080  | 3088 | HLA-A*68:01 | 100%      | Dengue virus 1 | ELISPOT                                  | IFNγ release | Positive              | 1                                                                   | 1    | 1    | 0         | 0      | 0    |
| 186176     | TWSIAHHQW        | NS5          | 3286  | 3295 | HLA-A*23:01 | 100%      | Dengue virus 1 | ELISPOT                                  | IFNγ release | Positive              | 1                                                                   | 1    | 1    | 0         | 0      | 0    |
| 73076      | WSIAHHQW         | NS5          | 3287  | 3295 | HLA-B*57:01 | 100%      | Dengue virus 1 | ELISPOT                                  | IFNγ release | Positive              | 1                                                                   | 1    | 1    | 0         | 0      | 0    |
| 180637     | MAFIARFL         | C            | 48    | 56   | HLA-B*35:01 | 81% <100% | Dengue virus 1 | ELISPOT                                  | IFNγ release | Positive              | 1                                                                   | 1    | 1    | 0         | 0      | 0    |
| 183175     | FIARFLRA         | C            | 50    | 58   | HLA-A*68:02 | 81% <100% | Dengue virus 1 | ELISPOT                                  | IFNγ release | Positive              | 1                                                                   | 1    | 1    | 0         | 0      | 0    |
| 183220     | FNMLKRRNR        | C            | 14    | 23   | HLA-A*33:01 | 81% <100% | Dengue virus 1 | ELISPOT                                  | IFNγ release | Positive              | 1                                                                   | 1    | 1    | 0         | 0      | 0    |
| 183800     | IMNRKRRSV        | C            | 94    | 102  | HLA-B*08:01 | 81% <100% | Dengue virus 1 | ELISPOT                                  | IFNγ release | Positive              | 1                                                                   | 1    | 1    | 0         | 0      | 0    |
| 184458     | LLMLLPTAL        | C            | 83    | 91   | HLA-B*08:01 | 81% <100% | Dengue virus 1 | ELISPOT                                  | IFNγ release | Positive              | 1                                                                   | 1    | 1    | 0         | 0      | 0    |
| 184880     | MNRKRKSVT        | C            | 95    | 103  | HLA-B*08:01 | 81% <100% | Dengue virus 1 | ELISPOT                                  | IFNγ release | Positive              | 1                                                                   | 1    | 1    | 0         | 0      | 0    |
| 185102     | NRKRKSVTM        | C            | 96    | 104  | HLA-B*08:01 | 81% <100% | Dengue virus 1 | ELISPOT                                  | IFNγ release | Positive              | 1                                                                   | 1    | 1    | 0         | 0      | 0    |
| 185492     | RRKRKSVTMLL      | C            | 97    | 106  | HLA-B*08:01 | 81% <100% | Dengue virus 1 | ELISPOT                                  | IFNγ release | Positive              | 1                                                                   | 1    | 1    | 0         | 0      | 0    |
| 183596     | HPGFTVWTF        | PreM         | 244   | 253  | HLA-B*35:01 | 81% <100% | Dengue virus 1 | ELISPOT                                  | IFNγ release | Positive              | 1                                                                   | 1    | 1    | 0         | 1      | 1    |
| 16554      | FLDLPLPWT        | E            | 213   | 221  | HLA-A2      | 81% <100% | Dengue virus 1 | ICS                                      | IFNγ release | Positive              | 1                                                                   | 1    | 1    | 1         | 1      | 1    |
| 183421     | GLNSRSSTL        | E            | 747   | 755  | HLA-B*08:01 | 81% <100% | Dengue virus 1 | ELISPOT                                  | IFNγ release | Positive              | 1                                                                   | 1    | 1    | 1         | 0      | 1    |
| 183654     | IAGVMFTLY        | E            | 760   | 768  | HLA-B*35:01 | 81% <100% | Dengue virus 1 | ELISPOT                                  | IFNγ release | Positive              | 1                                                                   | 1    | 1    | 0         | 1      | 1    |
| 184377     | LGLNSRSSTL       | E            | 746   | 755  | HLA-B*08:01 | 81% <100% | Dengue virus 1 | ELISPOT                                  | IFNγ release | Positive              | 1                                                                   | 1    | 1    | 1         | 0      | 1    |
| 184626     | LDYGLATL         | E            | 456   | 464  | HLA-A*01:01 | 81% <100% | Dengue virus 1 | ELISPOT                                  | IFNγ release | Positive              | 1                                                                   | 1    | 1    | 1         | 0      | 1    |
| 185212     | PTSEQLTDTY       | E            | 449   | 458  | HLA-A*01:01 | 81% <100% | Dengue virus 1 | ELISPOT                                  | IFNγ release | Positive              | 1                                                                   | 1    | 1    | 1         | 1      | 1    |
| 419036     | PTDIEI           | E            | 319   | 327  | HLA-A*11:01 | 81% <100% | Dengue virus 1 | ELISPOT                                  | IFNγ release | Positive              | 1                                                                   | 1    | 1    | 1         | 1      | 1    |
| 588005     | RDVFEGSGATWVDVWL | E            | 289   | 302  | HLA class I | 81% <100% | Dengue virus 1 | ICS                                      | IFNγ release | Positive              | 1                                                                   | 1    | 1    | 1         | 1      | 1    |
| 500597     | VGLSGATWVDVLEHG  | E            | 292   | 308  | HLA class I | 81% <100% | Dengue virus 1 | ICS                                      | IFNγ release | Positive-Intermediate | 1                                                                   | 1    | 1    | 1         | 1      | 1    |
| 180836     | YCGPIIDVNL       | NS1          | 1023  | 1031 | HLA-B*35:01 | 81% <100% | Dengue virus 1 | ELISPOT                                  | IFNγ release | Positive              | 1                                                                   | 1    | 1    | 0         | 0      | 0    |
| 183619     | HTWTEQYKF        | NS1          | 801   | 809  | HLA-B57     | 81% <100% | Dengue virus 1 | 51 chromium<br>cytotoxicity              | Positive     | 1                     | 1                                                                   | 1    | 0    | 0         | 0      | 0    |
| 60104      | SPKRLAS          | NS1          | 813   | 821  | HLA-B*08:01 | 81% <100% | Dengue virus 1 | ELISPOT                                  | IFNγ release | Positive              | 1                                                                   | 1    | 1    | 0         | 0      | 0    |
| 184623     | LDTFQSHL         | NS2a         | 1264  | 1272 | HLA-A*01:01 | 81% <100% | Dengue virus 1 | ELISPOT                                  | IFNγ release | Positive              | 1                                                                   | 1    | 1    | 1         | 0      | 0    |
| 185468     | RPMFAVGILF       | NS2a         |       |      |             |           |                |                                          |              |                       |                                                                     |      |      |           |        |      |



|         |                      |      |      |      |             |             |                |         |              |               |   |   |   |   |   |   |
|---------|----------------------|------|------|------|-------------|-------------|----------------|---------|--------------|---------------|---|---|---|---|---|---|
| 64286   | TIENTTANISLTAIA      | NS4b | 2300 | 2314 | HLA class I | 81% - <100% | Dengue virus 1 | ELISPOT | IFNg release | Positive      | 1 | 1 | 1 | 0 | 0 | 0 |
| 1068332 | SSWEDVPYL            | NS5  | 3323 | 3331 | HLA-A*02:01 | 81% - <100% | Dengue virus 1 | ELISPOT | IFNg release | Positive      | 1 | 1 | 1 | 0 | 0 | 0 |
| 180376  | ASSMYNGVVR           | NS5  | 2809 | 2818 | HLA-B*57:01 | 81% - <100% | Dengue virus 1 | ELISPOT | IFNg release | Positive      | 1 | 1 | 1 | 0 | 0 | 0 |
| 180411  | DTPTFGQQR            | NS5  | 2837 | 2845 | HLA-A*68:01 | 81% - <100% | Dengue virus 1 | ELISPOT | IFNg release | Positive      | 1 | 1 | 1 | 0 | 0 | 0 |
| 180571  | KPRICLREEF           | NS5  | 2882 | 2891 | HLA-B*07:02 | 81% - <100% | Dengue virus 1 | ELISPOT | IFNg release | Positive      | 1 | 1 | 1 | 0 | 0 | 0 |
| 180723  | RFLEFALGF            | NS5  | 2974 | 2983 | HLA-A*23:01 | 81% - <100% | Dengue virus 1 | ELISPOT | IFNg release | Positive      | 1 | 1 | 1 | 0 | 0 | 0 |
| 182554  | ALLATSIKF            | NS5  | 3054 | 3062 | HLA-A*11:01 | 81% - <100% | Dengue virus 1 | ELISPOT | IFNg release | Positive      | 1 | 1 | 1 | 0 | 0 | 0 |
| 182836  | DYMTSMKRF            | NS5  | 3373 | 3381 | HLA-A*24:02 | 81% - <100% | Dengue virus 1 | ELISPOT | IFNg release | Positive      | 0 | 0 | 0 | 0 | 0 | 0 |
| 183275  | FTNMEVQLIR           | NS5  | 3104 | 3113 | HLA-B*35:01 | 81% - <100% | Dengue virus 1 | ELISPOT | IFNg release | Positive      | 0 | 0 | 0 | 0 | 0 | 0 |
| 184212  | KVRKIDIPQW           | NS5  | 3178 | 3186 | HLA-B*57:01 | 81% - <100% | Dengue virus 1 | ELISPOT | IFNg release | Positive      | 1 | 1 | 1 | 0 | 0 | 0 |
| 539702  | MVTQIAMDTTPFGQQR     | NS5  | 2829 | 2845 | HLA class I | 81% - <100% | Dengue virus 1 | ICS     | IFNg release | Positive      | 1 | 1 | 1 | 0 | 0 | 0 |
| 62903   | TAKWLWGFLSRNKKPRICTR | NS5  | 2869 | 2888 | HLA class I | 81% - <100% | Dengue virus 1 | ELISPOT | IFNg release | Positive      | 0 | 0 | 0 | 0 | 0 | 0 |
| 65567   | TPFGQQRVF            | NS5  | 2839 | 2847 | HLA class I | 81% - <100% | Dengue virus 1 | ELISPOT | IFNg release | Positive      | 1 | 1 | 1 | 0 | 0 | 0 |
| 72563   | WHYDEDNPVKTWAYHGSYEV | NS5  | 2784 | 2803 | HLA class I | 81% - <100% | Dengue virus 1 | ELISPOT | IFNg release | Positive      | 1 | 1 | 1 | 0 | 0 | 0 |
| 184003  | KEISSMLNIM           | C    | 86   | 95   | HLA-B*40:01 | 51%-80%     | Dengue virus 1 | ELISPOT | IFNg release | Positive      | 0 | 0 | 0 | 0 | 0 | 0 |
| 186524  | WTMKIGIGIL           | E    | 733  | 742  | HLA-B*08:01 | 51%-80%     | Dengue virus 1 | ELISPOT | IFNg release | Positive      | 1 | 1 | 1 | 0 | 1 | 1 |
| 184736  | MAMVLSIVS            | NS2a | 1295 | 1303 | HLA-B*35:01 | 51%-80%     | Dengue virus 1 | ELISPOT | IFNg release | Positive      | 0 | 0 | 0 | 1 | 0 | 0 |
| 419005  | LLAVSGVPM            | NS2b | 1448 | 1457 | HLA-B*15:01 | 51%-80%     | Dengue virus 1 | ELISPOT | IFNg release | Positive      | 0 | 0 | 0 | 0 | 0 | 0 |
| 184849  | MLLNRFITMA           | NS5  | 24   | 32   | HLA-B*08:01 | 51%-80%     | Dengue virus 1 | ELISPOT | IFNg release | Positive      | 1 | 1 | 1 | 0 | 0 | 0 |
| 186217  | VEDDRFWDL            | NS5  | 2918 | 2926 | HLA-B*40:01 | 51%-80%     | Dengue virus 1 | ELISPOT | IFNg release | Positive      | 1 | 1 | 1 | 0 | 0 | 0 |
| 419208  | GVEGEGLHK            | NS5  | 2998 | 3006 | HLA-A*11:01 | 51%-80%     | Dengue virus 1 | ELISPOT | IFNg release | Positive-High | 1 | 1 | 1 | 0 | 0 | 0 |
| 150255  | GPMKLVMAFI           | C    | 43   | 52   | HLA-B*07:02 | >0% - 50%   | Dengue virus 1 | ELISPOT | IFNg release | Positive      | 1 | 1 | 1 | 0 | 0 | 0 |
| 184835  | MKLVMAFIAF           | C    | 44   | 53   | HLA-B*35:01 | >0% - 50%   | Dengue virus 1 | ELISPOT | IFNg release | Positive      | 1 | 1 | 1 | 0 | 0 | 0 |
| 183245  | FQSHQLWATL           | NS2a | 1267 | 1276 | HLA-B*15:01 | >0% - 50%   | Dengue virus 1 | ELISPOT | IFNg release | Positive      | 1 | 1 | 1 | 0 | 0 | 0 |
| 183252  | FSLYHAWKTM           | NS2a | 1286 | 1295 | HLA-B*35:01 | >0% - 50%   | Dengue virus 1 | ELISPOT | IFNg release | Positive      | 1 | 1 | 1 | 1 | 0 | 0 |
| 180670  | MPVTVASAAQ           | NS3  | 1923 | 1932 | HLA-B*35:01 | >0% - 50%   | Dengue virus 1 | ELISPOT | IFNg release | Positive      | 1 | 1 | 1 | 0 | 0 | 0 |
| 184896  | MPVTVASAA            | NS3  | 1923 | 1931 | HLA-B*35:01 | >0% - 50%   | Dengue virus 1 | ELISPOT | IFNg release | Positive      | 1 | 1 | 1 | 0 | 0 | 0 |
| 419125  | AVKSEHTGR            | NS3  | 1722 | 1730 | HLA-A*11:01 | >0% - 50%   | Dengue virus 1 | ELISPOT | IFNg release | Positive      | 0 | 0 | 0 | 0 | 0 | 0 |
| 184554  | LPQHLTORAQ           | NS4a | 2107 | 2116 | HLA-B*35:01 | >0% - 50%   | Dengue virus 1 | ELISPOT | IFNg release | Positive      | 1 | 1 | 1 | 0 | 0 | 0 |
| 150579  | SPGKFWNTTI           | NS4b | 2453 | 2462 | HLA-B*07:02 | >0% - 50%   | Dengue virus 1 | ELISPOT | IFNg release | Positive      | 1 | 1 | 1 | 0 | 0 | 0 |
| 150308  | IPMATYGNWL           | NS5  | 2607 | 2616 | HLA-B*07:02 | >0% - 50%   | Dengue virus 1 | ELISPOT | IFNg release | Positive      | 1 | 1 | 1 | 0 | 0 | 0 |
| 185485  | ROMESEGIFL           | NS5  | 3113 | 3122 | HLA-B*15:01 | >0% - 50%   | Dengue virus 1 | ELISPOT | IFNg release | Positive      | 0 | 0 | 0 | 0 | 0 | 0 |
| 5223    | ATYGNWLVK            | NS5  | 2610 | 2618 | HLA-A*03:01 | >0% - 50%   | Dengue virus 1 | ELISPOT | IFNg release | Positive      | 1 | 1 | 1 | 0 | 0 | 0 |
| 539435  | ISGDDCVKPIDDRFAT     | NS5  | 3152 | 3168 | HLA class I | >0% - 50%   | Dengue virus 1 | ICS     | IFNg release | Positive      | 1 | 1 | 1 | 0 | 0 | 0 |
| 540100  | VVKPIDDRFATALTN      | NS5  | 3157 | 3173 | HLA class I | >0% - 50%   | Dengue virus 1 | ICS     | IFNg release | Positive      | 1 | 1 | 1 | 0 | 0 | 0 |
| 67362   | TYGNWLVKL            | NS5  | 2611 | 2619 | HLA-A*24:02 | >0% - 50%   | Dengue virus 1 | ELISPOT | IFNg release | Positive      | 1 | 1 | 1 | 0 | 0 | 0 |



## CDB DENV-2 Epitopes

|            |                   |              |       |      |             |      |                |                   |                     |                     | DENV-2 constructs of vaccines (100% identity=1, green ; else 0, red) |      |      |           |        |      |
|------------|-------------------|--------------|-------|------|-------------|------|----------------|-------------------|---------------------|---------------------|----------------------------------------------------------------------|------|------|-----------|--------|------|
| Epitope ID | AA Seq            | Protein Name | Start | End  | Allele      | Step | Serotype       | Method/Technique  | Assay Group         | Qualitative Measure | TV003                                                                | TDEN | DPIV | Dengvaxia | DENVax | TV0V |
| 185399     | RKKARSTPF         | C            | 5     | 13   | HLA-B*08:01 | 0%   | Dengue virus 2 | ELISPOT           | IFNg release        | Positive            | 0                                                                    | 0    | 0    | 0         | 0      | 0    |
| 180818     | WILRHPGFTMMIAAL   | PreM         | 126   | 140  | HLA class I | 0%   | Dengue virus 2 | ICS               | IFNg release        | Positive            | 0                                                                    | 0    | 0    | 0         | 1      | 0    |
| 183577     | HFQRALIFIL        | PreM         | 262   | 271  | HLA-B*08:01 | 0%   | Dengue virus 2 | ELISPOT           | IFNg release        | Positive            | 1                                                                    | 1    | 1    | 1         | 1      | 1    |
| 183621     | HYQRIETWIL        | PreM         | 233   | 242  | HLA-B*08:01 | 0%   | Dengue virus 2 | ELISPOT           | IFNg release        | Positive            | 0                                                                    | 0    | 0    | 0         | 1      | 0    |
| 186264     | VGRQEKGSKL        | PreM         | 128   | 137  | HLA-B*08:01 | 0%   | Dengue virus 2 | ELISPOT           | IFNg release        | Positive            | 0                                                                    | 0    | 0    | 0         | 0      | 0    |
| 180563     | KILIGVITWIGMNS    | E            | 456   | 470  | HLA class I | 0%   | Dengue virus 2 | ICS               | IFNg release        | Positive            | 1                                                                    | 1    | 1    | 1         | 1      | 0    |
| 183747     | LILGVIITW         | E            | 737   | 745  | HLA-B*58:01 | 0%   | Dengue virus 2 | ELISPOT           | IFNg release        | Positive            | 1                                                                    | 1    | 1    | 1         | 1      | 0    |
| 184300     | LATLRKYCI         | E            | 53    | 61   | HLA-B*08:01 | 0%   | Dengue virus 2 | ELISPOT           | IFNg release        | Positive            | 0                                                                    | 0    | 0    | 0         | 0      | 0    |
| 180496     | GVFTTNWILKKEKQ    | NS1          | 936   | 950  | HLA class I | 0%   | Dengue virus 2 | ICS               | IFNg release        | Positive            | 0                                                                    | 1    | 0    | 0         | 1      | 0    |
| 150448     | MMATIGIAL         | NS2a         | 1229  | 1237 | HLA-B*35:01 | 0%   | Dengue virus 2 | ELISPOT           | IFNg release        | Positive            | 0                                                                    | 0    | 0    | 0         | 0      | 0    |
| 150449     | MMATIGIAL         | NS2a         | 1229  | 1238 | HLA-A*02:01 | 0%   | Dengue virus 2 | ELISPOT           | IFNg release        | Positive            | 0                                                                    | 0    | 0    | 0         | 0      | 0    |
| 182687     | AYRIKQRGL         | NS3          | 1497  | 1506 | HLA-B*08:01 | 0%   | Dengue virus 2 | ELISPOT           | IFNg release        | Positive            | 0                                                                    | 0    | 0    | 0         | 0      | 0    |
| 182892     | ENMMEVEIWM        | NS3          | 2049  | 2057 | HLA-B*44:02 | 0%   | Dengue virus 2 | ELISPOT           | IFNg release        | Positive            | 0                                                                    | 0    | 0    | 0         | 0      | 0    |
| 184318     | LEENMEVEIWM       | NS3          | 2048  | 2057 | HLA-B*44:02 | 0%   | Dengue virus 2 | ELISPOT           | IFNg release        | Positive            | 0                                                                    | 0    | 0    | 0         | 0      | 0    |
| 186211     | VDRKGVYVGL        | NS3          | 1615  | 1624 | HLA-B*08:01 | 0%   | Dengue virus 2 | ELISPOT           | IFNg release        | Positive            | 0                                                                    | 0    | 0    | 0         | 0      | 0    |
| 186301     | VLNHRGRI          | NS3          | 1532  | 1540 | HLA-B*08:01 | 0%   | Dengue virus 2 | ELISPOT           | IFNg release        | Positive            | 0                                                                    | 0    | 0    | 0         | 0      | 0    |
| 22816      | GTSGSPIADK        | NS3          | 1608  | 1617 | HLA-A*11:01 | 0%   | Dengue virus 2 | multimer/tetramer | qualitative binding | Positive            | 0                                                                    | 0    | 0    | 0         | 0      | 0    |
| 22817      | GTSGSPIADKK       | NS3          | 1608  | 1618 | HLA-A11     | 0%   | Dengue virus 2 | ELISPOT           | IFNg release        | Positive            | 0                                                                    | 0    | 0    | 0         | 0      | 0    |
| 22824      | GTSGSPIDVR        | NS3          | 1608  | 1617 | HLA-A*11:01 | 0%   | Dengue virus 2 | 51 chromium       | cytotoxicity        | Positive            | 0                                                                    | 0    | 0    | 0         | 0      | 0    |
| 46575      | NYADRWKCF         | NS3          | 2031  | 2039 | HLA-A24     | 0%   | Dengue virus 2 | 51 chromium       | cytotoxicity        | Positive            | 0                                                                    | 0    | 0    | 0         | 0      | 0    |
| 65548      | TPGIIIPSL         | NS3          | 1975  | 1983 | HLA-B35     | 0%   | Dengue virus 2 | 51 chromium       | cytotoxicity        | Positive            | 0                                                                    | 0    | 0    | 0         | 0      | 0    |
| 150373     | LULLCVTVQ         | NS4b         | 2416  | 2424 | HLA-A*02:01 | 0%   | Dengue virus 2 | ELISPOT           | IFNg release        | Positive            | 0                                                                    | 0    | 0    | 0         | 0      | 0    |
| 150445     | MLLVCVTVQ         | NS4b         | 2415  | 2424 | HLA-A*02:01 | 0%   | Dengue virus 2 | ELISPOT           | IFNg release        | Positive            | 0                                                                    | 0    | 0    | 0         | 0      | 0    |
| 150639     | TLVAVATTV         | NS4b         | 2282  | 2291 | HLA-A*02:01 | 0%   | Dengue virus 2 | ELISPOT           | IFNg release        | Positive            | 0                                                                    | 1    | 1    | 0         | 1      | 0    |
| 180601     | LULLCVTVLM        | NS4b         | 2417  | 2426 | HLA-B*35:01 | 0%   | Dengue virus 2 | ELISPOT           | IFNg release        | Positive            | 0                                                                    | 0    | 0    | 0         | 0      | 0    |
| 180794     | VATTVVTPM         | NS4b         | 2286  | 2294 | HLA-B*35:01 | 0%   | Dengue virus 2 | ELISPOT           | IFNg release        | Positive            | 0                                                                    | 1    | 1    | 0         | 1      | 0    |
| 184439     | LULLCVTVLM        | NS4b         | 2416  | 2425 | HLA-B*08:01 | 0%   | Dengue virus 2 | ELISPOT           | IFNg release        | Positive            | 0                                                                    | 0    | 0    | 0         | 0      | 0    |
| 150698     | VPIYLGKREDQ       | NS5          | 3327  | 3336 | HLA-B*07:02 | 0%   | Dengue virus 2 | ELISPOT           | IFNg release        | Positive            | 0                                                                    | 0    | 0    | 0         | 0      | 0    |
| 163620     | TITEIAVQ          | NS5          | 3127  | 3135 | HLA-A*02:01 | 0%   | Dengue virus 2 | ELISPOT           | IFNg release        | Positive            | 0                                                                    | 0    | 0    | 0         | 1      | 0    |
| 184234     | KWKSRLNAL         | NS5          | 2503  | 2511 | HLA-B*08:01 | 0%   | Dengue virus 2 | ELISPOT           | IFNg release        | Positive            | 0                                                                    | 1    | 1    | 0         | 1      | 0    |
| 32939      | PKWDIIPNV         | NS5          | 2821  | 2829 | HLA-B*55:02 | 0%   | Dengue virus 2 | 51 chromium       | cytotoxicity        | Positive            | 0                                                                    | 0    | 0    | 0         | 0      | 0    |
| 32941      | KPWVDVPMV         | NS5          | 2821  | 2829 | HLA class I | 0%   | Dengue virus 2 | 51 chromium       | cytotoxicity        | Positive            | 0                                                                    | 0    | 0    | 0         | 0      | 0    |
| 32942      | KPWVDVPTV         | NS5          | 2821  | 2829 | HLA class I | 0%   | Dengue virus 2 | 51 chromium       | cytotoxicity        | Positive            | 0                                                                    | 0    | 0    | 0         | 0      | 0    |
| 150552     | GPLKLFMAL         | C            | 42    | 50   | HLA-B*08:01 | 100% | Dengue virus 2 | ELISPOT           | IFNg release        | Positive            | 0                                                                    | 1    | 1    | 0         | 1      | 0    |
| 150584     | TLMMMDL GEL       | PreM         | 149   | 158  | HLA-A*02:01 | 100% | Dengue virus 2 | ELISPOT           | IFNg release        | Positive            | 1                                                                    | 1    | 1    | 1         | 1      | 1    |
| 150456     | MSYSMCKTGF        | E            | 577   | 586  | HLA-B*35:01 | 100% | Dengue virus 2 | ELISPOT           | IFNg release        | Positive            | 1                                                                    | 1    | 1    | 1         | 1      | 1    |
| 150531     | RLRMOKLQL         | E            | 566   | 574  | HLA-B*08:01 | 100% | Dengue virus 2 | ELISPOT           | IFNg release        | Positive            | 1                                                                    | 1    | 1    | 1         | 1      | 1    |
| 16553      | FLDLPLPWL         | E            | 213   | 221  | HLA-A2      | 100% | Dengue virus 2 | ICS               | TNF release         | Positive            | 1                                                                    | 1    | 1    | 1         | 1      | 1    |
| 180618     | LPLPWLPAGD        | E            | 496   | 505  | HLA-B*35:01 | 100% | Dengue virus 2 | ELISPOT           | IFNg release        | Positive            | 1                                                                    | 1    | 1    | 1         | 1      | 1    |
| 180726     | RMALGDTAWDFGSL    | E            | 691   | 705  | HLA-B7      | 100% | Dengue virus 2 | ICS               | IFNg release        | Positive            | 1                                                                    | 1    | 1    | 1         | 1      | 0    |
| 180816     | WGNCGGLFGKGGVIT   | E            | 381   | 395  | HLA class I | 100% | Dengue virus 2 | ICS               | IFNg release        | Positive            | 1                                                                    | 1    | 1    | 1         | 1      | 1    |
| 182946     | EAKQPATLR         | E            | 329   | 337  | HLA-A*68:01 | 100% | Dengue virus 2 | ELISPOT           | IFNg release        | Positive            | 1                                                                    | 1    | 1    | 1         | 1      | 1    |
| 183437     | GMNSRSTSL         | E            | 747   | 755  | HLA-B*08:01 | 100% | Dengue virus 2 | ELISPOT           | IFNg release        | Positive            | 1                                                                    | 1    | 1    | 1         | 1      | 0    |
| 183708     | IGMNSRSTSL        | E            | 746   | 755  | HLA-B*08:01 | 100% | Dengue virus 2 | ELISPOT           | IFNg release        | Positive            | 1                                                                    | 1    | 1    | 1         | 1      | 0    |
| 183841     | IQMSSGNLFL        | E            | 550   | 559  | HLA-A*23:01 | 100% | Dengue virus 2 | ELISPOT           | IFNg release        | Positive            | 1                                                                    | 1    | 1    | 1         | 1      | 1    |
| 184571     | LQLKGMYSYM        | E            | 572   | 581  | HLA-B*08:01 | 100% | Dengue virus 2 | ELISPOT           | IFNg release        | Positive            | 1                                                                    | 1    | 1    | 1         | 1      | 1    |
| 184899     | MRRGAKRMAL        | E            | 686   | 694  | HLA-B*08:01 | 100% | Dengue virus 2 | ELISPOT           | IFNg release        | Positive            | 1                                                                    | 1    | 1    | 1         | 1      | 0    |
| 184900     | MRRGAKRMAL        | E            | 686   | 695  | HLA-B*08:01 | 100% | Dengue virus 2 | ELISPOT           | IFNg release        | Positive            | 1                                                                    | 1    | 1    | 1         | 1      | 0    |
| 184920     | MSGNLLFTG         | E            | 552   | 561  | HLA-B*58:01 | 100% | Dengue virus 2 | ELISPOT           | IFNg release        | Positive            | 1                                                                    | 1    | 1    | 1         | 1      | 1    |
| 185758     | SRSLSVSL          | E            | 750   | 759  | HLA-B*08:01 | 100% | Dengue virus 2 | ELISPOT           | IFNg release        | Positive            | 1                                                                    | 1    | 1    | 1         | 0      | 0    |
| 185831     | SYSMCTGKF         | E            | 578   | 586  | HLA-A*23:01 | 100% | Dengue virus 2 | ELISPOT           | IFNg release        | Positive            | 1                                                                    | 1    | 1    | 1         | 1      | 1    |
| 27081      | ILGDTAWDFG        | E            | 96    | 105  | HLA class I | 100% | Dengue virus 2 | ELISPOT           | IFNg release        | Positive            | 1                                                                    | 1    | 1    | 1         | 1      | 0    |
| 51388      | QLKGMYSYM         | E            | 573   | 581  | HLA-B*08:01 | 100% | Dengue virus 2 | ELISPOT           | IFNg release        | Positive            | 1                                                                    | 1    | 1    | 1         | 1      | 1    |
| 583702     | GVSGSGVSDVLEHSGCV | E            | 14    | 31   | HLA class I | 100% | Dengue virus 2 | ICS               | IFNg release        | Positive-Low        | 1                                                                    | 1    | 1    | 1         | 1      | 1    |
| 150259     | GPWHLGLKLE        | NS1          | 1041  | 1050 | HLA-B*35:01 | 100% | Dengue virus 2 | ELISPOT           | IFNg release        | Positive            | 0                                                                    | 1    | 1    | 0         | 1      | 0    |
| 184512     | LMWVKQTEL         | NS1          | 841   | 850  | HLA-B*08:01 | 100% | Dengue virus 2 | ELISPOT           | IFNg release        | Positive            | 0                                                                    | 1    | 1    | 0         | 1      | 0    |
| 185465     | RLPKKEENL         | NS1          | 1111  | 1120 | HLA-B*08:01 | 100% | Dengue virus 2 | ELISPOT           | IFNg release        | Positive            | 0                                                                    | 1    | 1    | 0         | 1      | 0    |
| 186474     | WKTWGWAKMAL       | NS1          | 890   | 899  | HLA-B*08:01 | 100% | Dengue virus 2 | ELISPOT           | IFNg release        | Positive            | 0                                                                    | 1    | 1    | 0         | 1      | 0    |
| 19225      | GEDGCGYGM         | NS1          | 1100  | 1108 | HLA-B*40:01 | 100% | Dengue virus 2 | ELISPOT           | IFNg release        | Positive            | 0                                                                    | 1    | 1    | 0         | 1      | 0    |
| 150415     | LTDALALGM         | NS2a         | 1250  | 1258 | HLA-A*01:01 | 100% | Dengue virus 2 | ELISPOT           | IFNg release        | Positive            | 0                                                                    | 1    | 1    | 0         | 1      | 0    |
| 180671     | MSFRDLGRVM        | NS2a         | 1175  | 1184 | HLA-B*35:01 | 100% | Dengue virus 2 | ELISPOT           | IFNg release        | Positive            | 0                                                                    | 0    | 1    | 0         | 1      | 0    |
| 150304     | IMAVGMQSI         | NS2b         | 1353  | 1361 | HLA-A*02:01 | 100% | Dengue virus 2 | ELISPOT           | IFNg release        | Positive            | 0                                                                    | 1    | 1    | 0         | 1      | 0    |
| 180531     | IPMTGPI VAG       | NS2b         | 1371  | 1380 | HLA-B*35:01 | 100% | Dengue virus 2 | ELISPOT           | IFNg release        | Positive            | 0                                                                    | 1    | 1    | 0         | 1      | 0    |
| 180646     | IMAVGMQSI         | NS2b         | 1354  | 1362 | HLA-B*35:01 | 100% | Dengue virus 2 | ELISPOT           | IFNg release        | Positive            | 0                                                                    | 1    | 1    | 0         | 1      | 0    |
| 183729     | IMAVGMQSI         | NS2b         | 1353  | 1362 | HLA-B*08:01 | 100% | Dengue virus 2 | ELISPOT           | IFNg release        | Positive            | 0                                                                    | 1    | 1    | 0         | 1      | 0    |
| 11125      | EALRGLPIR         | NS3          | 233   | 241  | HLA class I | 100% | Dengue virus 2 | ELISPOT           | IFNg release        | Positive            | 0                                                                    | 1    | 1    | 0         | 1      | 0    |
| 13358      | EMEALRGLPIRYQT    | NS3          | 230   | 244  | HLA class I | 100% | Dengue virus 2 | ELISPOT           | IFNg release        | Positive            | 0                                                                    | 1    | 1    | 0         | 1      | 0    |
| 13690      | TPGSRDPF          | NS3          | 1792  | 1800 | HLA-B*35:01 | 100% | Dengue virus 2 | ELISPOT           | IFNg release        | Positive            | 0                                                                    | 1    | 1    | 0         | 1      | 0    |
| 150137     | APTRVVAEM         | NS3          | 222   | 231  | HLA-B7      | 100% | Dengue virus 2 | multimer/tetramer | qualitative binding | Positive            | 0                                                                    | 1    | 1    | 0         | 1      | 0    |
| 150217     | FPQSNAPIM         | NS3          | 1800  | 1808 | HLA-B*35:01 | 100% | Dengue virus 2 | ELISPOT           | IFNg release        | Positive            | 0                                                                    | 0    | 1    | 0         | 0      | 0    |
| 150526     | RIYSDPLAKL        | NS3          | 2074  | 2083 | HLA-A*11:01 | 100% | Dengue virus 2 | ELISPOT           | IFNg release        | Positive            | 0                                                                    | 1    | 1    | 0         | 1      | 0    |
| 150595     | SOIGAGVYK         | NS3          | 1509  | 1517 | HLA-A*11:01 | 100% | Dengue virus 2 | ELISPOT           | IFNg release        | Positive            | 0                                                                    | 1    | 1    | 0         | 1      | 0    |
| 150644     | TPGIIIPSMF        | NS3          | 1975  | 1984 | HLA-B*53:01 | 100% | Dengue virus 2 | ELISPOT           | IFNg release        | Positive            | 0                                                                    | 1    | 1    | 0         | 1      | 0    |
| 150693     | VPNYLLIM          | NS3          | 1750  | 1758 | HLA-B*07:02 | 100% | Dengue virus 2 | ELISPOT           | IFNg release        | Positive            | 0                                                                    | 1    | 1    | 0         | 1      | 0    |
| 150740     | YLPALVREA         | NS3          | 1678  | 1686 | HLA-A*02:01 | 100% | Dengue virus 2 | ELISPOT           | IFNg release        | Positive            | 0                                                                    | 1    | 1    | 0         | 1      | 0    |
| 180360     | AAEGINYADRRWCFD   | NS3          | 2026  | 2040 | HLA-A24     | 100% | Dengue virus 2 | ELISPOT           | IFNg release        | Positive            | 0                                                                    | 1    | 1    | 0         | 1      | 0    |
| 180407     | DNINTPEGIIPSMFE   | NS3          | 496   | 510  | HLA-B35     | 100% | Dengue virus 2 | ELISPOT           | IFNg release        | Positive            | 0                                                                    | 1    | 1    | 0         | 1      | 0    |
| 180428     | EGEMKEEGEVQIAL    | NS3          | 1561  | 1575 | HLA class I | 100% | Dengue virus 2 | ICS               | IFNg release        | Positive            | 0                                                                    | 1    | 1    | 0         | 1      | 0    |
| 180440     | EREIPERSNGSHWE    | NS3          | 336   | 350  | HLA-B*57:01 | 100% | Dengue virus 2 | ELISPOT           | IFNg release        | Positive            | 0                                                                    | 1    | 0    | 0         | 1      | 0    |
| 180460     | FPQSNAPIM         | NS3          | 1800  | 1809 | HLA-B*35:01 | 100% | Dengue virus 2 | ELISPOT           | IFNg release        | Positive            | 0                                                                    | 0    | 1    | 0         | 0      | 0    |
| 180503     | HPGAGCKTRY        | NS3          | 1669  | 1678 | HLA-B*35:01 | 100% | Dengue virus 2 | ELISPOT           | IFNg release        | Positive            | 0                                                                    | 1    | 1    | 0         | 0      | 0    |
| 180507     | HTGREVDLMCHATE    | NS3          | 1726  | 1740 | HLA class I | 100% | Dengue virus 2 | ELISPOT           | IFNg release        | Positive            | 0                                                                    | 1    | 1    | 0         | 1      | 0    |
| 180575     | KRYLPANREAIKRG    | NS3          | 201   | 215  | HLA-A*31:01 | 100% | Dengue virus 2 | ELISPOT           | IFNg release        | Positive            | 0                                                                    | 1    | 1    | 0         | 1      | 0    |
| 180589     | LDARISYDPLALKEF   | NS3          | 596   | 610  | HLA class I | 100% | Dengue virus 2 | ELISPOT           | IFNg release        | Positive            | 0                                                                    | 1    | 1    | 0         | 1      | 0    |
| 180605     | LMCHATTMT         | NS3          | 1734  | 1742 | HLA-B*15:01 | 100% | Dengue virus 2 | ELISPOT           | IFNg release        | Positive            | 0                                                                    | 1    | 1    | 0         | 1      | 0    |
| 180617     | LPIRYQTPI         | NS3          | 1713  | 1722 | HLA-B*35:01 | 100% | Dengue virus 2 | ELISPOT           | IFNg release        | Positive            | 0                                                                    | 1    | 1    | 0         | 1      | 0    |
| 180642     | MEALRGLPIRYQT     | NS3          | 1706  | 1720 | HLA class I | 100% | Dengue virus 2 | ELISPOT           | IFNg release        | Positive            | 0                                                                    | 1    | 1    | 0         | 1      | 0    |
| 180734     |                   |              |       |      |             |      |                |                   |                     |                     |                                                                      |      |      |           |        |      |



|        |                   |      |      |      |             |           |                |             |              |              |   |   |   |   |   |   |
|--------|-------------------|------|------|------|-------------|-----------|----------------|-------------|--------------|--------------|---|---|---|---|---|---|
| 184814 | MGLGKGWPL         | NS4b | 2319 | 2327 | HLA-B*08:01 | 100%      | Dengue virus 2 | ELISPOT     | IFNg release | Positive     | 0 | 1 | 1 | 0 | 1 | 0 |
| 150309 | IPMSTYWGNNL       | NS5  | 2605 | 2614 | HLA-B*07:02 | 100%      | Dengue virus 2 | ELISPOT     | IFNg release | Positive     | 0 | 1 | 1 | 0 | 1 | 0 |
| 150655 | TPRMCTREEF        | NS5  | 2881 | 2890 | HLA-B*35:01 | 100%      | Dengue virus 2 | ELISPOT     | IFNg release | Positive     | 0 | 1 | 1 | 0 | 1 | 0 |
| 150750 | YDYMPYSMK         | NS5  | 3370 | 3378 | HLA-A*01:01 | 100%      | Dengue virus 2 | ELISPOT     | IFNg release | Positive     | 0 | 1 | 1 | 0 | 1 | 0 |
| 183027 | NIGTAINVQ         | NS5  | 3353 | 3361 | HLA-A*02:01 | 100%      | Dengue virus 2 | ELISPOT     | IFNg release | Positive-Low | 0 | 0 | 1 | 0 | 0 | 0 |
| 180443 | ETACLGKSYA        | NS5  | 3241 | 3250 | HLA-A*26:01 | 100%      | Dengue virus 2 | ELISPOT     | IFNg release | Positive     | 0 | 1 | 1 | 0 | 1 | 0 |
| 180643 | MAMMTDTPFGQQRV    | NS5  | 2832 | 2846 | HLA class I | 100%      | Dengue virus 2 | ELISPOT     | IFNg release | Positive     | 0 | 1 | 1 | 0 | 1 | 0 |
| 180675 | MPMSKRFRRR        | NS5  | 3374 | 3383 | HLA-B*53:01 | 100%      | Dengue virus 2 | ELISPOT     | IFNg release | Positive     | 0 | 1 | 1 | 0 | 1 | 0 |
| 180675 | MSTYGVNVLRLQSGV   | NS5  | 2607 | 2621 | HLA class I | 100%      | Dengue virus 2 | ELISPOT     | IFNg release | Positive     | 0 | 1 | 1 | 0 | 1 | 0 |
| 180814 | WAYHGSYET         | NS5  | 2794 | 2802 | HLA-B*35:01 | 100%      | Dengue virus 2 | ELISPOT     | IFNg release | Positive     | 0 | 1 | 1 | 0 | 1 | 0 |
| 180817 | WHYDDQHPY         | NS5  | 2783 | 2791 | HLA-B*35:01 | 100%      | Dengue virus 2 | ELISPOT     | IFNg release | Positive     | 0 | 1 | 1 | 0 | 1 | 0 |
| 184131 | KREDQWCGSL        | NS5  | 3332 | 3341 | HLA-B*08:01 | 100%      | Dengue virus 2 | ELISPOT     | IFNg release | Positive     | 0 | 1 | 1 | 0 | 1 | 0 |
| 185491 | RREEEAGVL         | NS5  | 3381 | 3390 | HLA-B*08:01 | 100%      | Dengue virus 2 | ELISPOT     | IFNg release | Positive     | 0 | 1 | 1 | 0 | 1 | 0 |
| 185931 | TKQTGSASSM        | NS5  | 2802 | 2811 | HLA-B*08:01 | 100%      | Dengue virus 2 | ELISPOT     | IFNg release | Positive     | 0 | 1 | 1 | 0 | 1 | 0 |
| 190862 | MVTQMAMTDTTPFGQQR | NS5  | 2828 | 2844 | HLA class I | 100%      | Dengue virus 2 | ICS         | IFNg release | Positive     | 0 | 1 | 1 | 0 | 1 | 0 |
| 53476  | REDQWCGSL         | NS5  | 3333 | 3341 | HLA-B*40:01 | 100%      | Dengue virus 2 | ELISPOT     | IFNg release | Positive     | 0 | 1 | 1 | 0 | 1 | 0 |
| 539436 | ISGDDCVVKPLDDRFA  | NS5  | 3151 | 3166 | HLA class I | 100%      | Dengue virus 2 | ICS         | IFNg release | Positive     | 0 | 1 | 1 | 0 | 1 | 0 |
| 69671  | VLNPYMPVS         | NS5  | 2673 | 2681 | HLA-A*02:01 | 100%      | Dengue virus 2 | ELISPOT     | IFNg release | Positive     | 0 | 1 | 1 | 0 | 1 | 0 |
| 110018 | VAFRLRLTI         | C    | 51   | 59   | HLA-B*08:01 | 81% <100% | Dengue virus 2 | ELISPOT     | IFNg release | Positive     | 0 | 1 | 1 | 0 | 1 | 0 |
| 184378 | LGMILQGRGPI       | C    | 35   | 44   | HLA-B*08:01 | 81% <100% | Dengue virus 2 | ELISPOT     | IFNg release | Positive     | 0 | 1 | 1 | 0 | 1 | 0 |
| 184643 | LTIPPTAGIL        | C    | 21   | 30   | HLA-B*08:01 | 81% <100% | Dengue virus 2 | ELISPOT     | IFNg release | Positive     | 0 | 1 | 1 | 0 | 1 | 0 |
| 186354 | VQQLTKRFL         | C    | 26   | 35   | HLA-B*08:01 | 81% <100% | Dengue virus 2 | ELISPOT     | IFNg release | Positive     | 0 | 1 | 1 | 0 | 1 | 0 |
| 150224 | FTIMAILAY         | PreM | 247  | 256  | HLA-B*35:01 | 81% <100% | Dengue virus 2 | ELISPOT     | IFNg release | Positive     | 1 | 1 | 1 | 1 | 0 | 1 |
| 150299 | ILLTAVAPSM        | PreM | 270  | 279  | HLA-B*08:01 | 81% <100% | Dengue virus 2 | ELISPOT     | IFNg release | Positive     | 1 | 1 | 1 | 1 | 0 | 1 |
| 150571 | SLLFKTEGTV        | PreM | 136  | 145  | HLA-A*02:01 | 81% <100% | Dengue virus 2 | ELISPOT     | IFNg release | Positive     | 1 | 1 | 1 | 1 | 1 | 1 |
| 150115 | AIYGAAGFSV        | E    | 722  | 731  | HLA-A*02:01 | 81% <100% | Dengue virus 2 | ELISPOT     | IFNg release | Positive     | 1 | 1 | 1 | 1 | 1 | 0 |
| 150319 | ITEALITGY         | E    | 450  | 458  | HLA-A*01:01 | 81% <100% | Dengue virus 2 | ELISPOT     | IFNg release | Positive     | 1 | 1 | 1 | 1 | 1 | 1 |
| 150399 | LQMEIKAWLV        | E    | 231  | 240  | HLA-B*08:01 | 81% <100% | Dengue virus 2 | ELISPOT     | IFNg release | Positive     | 1 | 1 | 1 | 1 | 1 | 1 |
| 150529 | RLITVNPV          | E    | 630  | 638  | HLA-A*02:01 | 81% <100% | Dengue virus 2 | ELISPOT     | IFNg release | Positive     | 1 | 1 | 1 | 1 | 1 | 1 |
| 150578 | SPCKIPFEM         | E    | 611  | 620  | HLA-B*35:01 | 81% <100% | Dengue virus 2 | ELISPOT     | IFNg release | Positive     | 1 | 1 | 1 | 1 | 1 | 1 |
| 150725 | WLVHVRQWFL        | E    | 486  | 494  | HLA-B*08:01 | 81% <100% | Dengue virus 2 | ELISPOT     | IFNg release | Positive     | 1 | 1 | 1 | 1 | 1 | 1 |
| 180453 | FGAIYGAAF         | E    | 720  | 728  | HLA-B*35:01 | 81% <100% | Dengue virus 2 | ELISPOT     | IFNg release | Positive     | 1 | 1 | 1 | 1 | 1 | 0 |
| 180528 | IPFEMIDLEK        | E    | 615  | 624  | HLA-B*35:01 | 81% <100% | Dengue virus 2 | ELISPOT     | IFNg release | Positive     | 1 | 1 | 1 | 1 | 1 | 1 |
| 183310 | GAAFGVGSW         | E    | 725  | 733  | HLA-B*58:01 | 81% <100% | Dengue virus 2 | ELISPOT     | IFNg release | Positive     | 1 | 1 | 1 | 1 | 1 | 0 |
| 183748 | ILIGVITW          | E    | 737  | 745  | HLA-B*58:01 | 81% <100% | Dengue virus 2 | ELISPOT     | IFNg release | Positive     | 0 | 0 | 0 | 0 | 0 | 0 |
| 183781 | IMDLKRRHL         | E    | 619  | 628  | HLA-B*08:01 | 81% <100% | Dengue virus 2 | ELISPOT     | IFNg release | Positive     | 1 | 1 | 1 | 1 | 1 | 1 |
| 183840 | IQKETLVTF         | E    | 512  | 520  | HLA-B*15:01 | 81% <100% | Dengue virus 2 | ELISPOT     | IFNg release | Positive     | 1 | 1 | 1 | 1 | 1 | 1 |
| 184337 | LEKRLHVL          | E    | 622  | 631  | HLA-B*08:01 | 81% <100% | Dengue virus 2 | ELISPOT     | IFNg release | Positive     | 1 | 1 | 1 | 1 | 1 | 1 |
| 184755 | MDELRKRL          | E    | 620  | 628  | HLA-B*08:01 | 81% <100% | Dengue virus 2 | ELISPOT     | IFNg release | Positive     | 1 | 1 | 1 | 1 | 1 | 1 |
| 141407 | MENKAWLVHRQWFLD   | E    | 201  | 215  | HLA-B*37:01 | 81% <100% | Dengue virus 2 | ICS         | IFNg release | Positive     | 1 | 1 | 1 | 1 | 1 | 1 |
| 180450 | FAGPVSQHNY        | NS1  | 1022 | 1031 | HLA-B*35:01 | 81% <100% | Dengue virus 2 | ELISPOT     | IFNg release | Positive     | 0 | 0 | 1 | 0 | 0 | 0 |
| 180689 | NRVAHDMGVWIESA    | NS1  | 966  | 980  | HLA class I | 81% <100% | Dengue virus 2 | ICS         | IFNg release | Positive     | 0 | 1 | 1 | 0 | 1 | 0 |
| 182938 | EKEENLVMSL        | NS1  | 1115 | 1124 | HLA-B*08:01 | 81% <100% | Dengue virus 2 | ELISPOT     | IFNg release | Positive     | 0 | 1 | 1 | 0 | 1 | 0 |
| 185342 | RAVHADMGY         | NS1  | 192  | 200  | HLA-B*58:01 | 81% <100% | Dengue virus 2 | ELISPOT     | IFNg release | Positive     | 0 | 1 | 1 | 0 | 1 | 0 |
| 150206 | FLEEMLRTRV        | NS2a | 1131 | 1140 | HLA-A*02:01 | 81% <100% | Dengue virus 2 | ELISPOT     | IFNg release | Positive     | 0 | 1 | 1 | 0 | 1 | 0 |
| 150391 | LMMTGITVL         | NS2a | 1228 | 1237 | HLA-B*08:01 | 81% <100% | Dengue virus 2 | ELISPOT     | IFNg release | Positive     | 0 | 1 | 1 | 0 | 1 | 0 |
| 150457 | MTDDIGMVL         | NS2a | 1191 | 1199 | HLA-A*01:01 | 81% <100% | Dengue virus 2 | ELISPOT     | IFNg release | Positive     | 0 | 1 | 1 | 0 | 1 | 0 |
| 150540 | RPTFAAGLL         | NS2a | 1211 | 1220 | HLA-B*07:02 | 81% <100% | Dengue virus 2 | ELISPOT     | IFNg release | Positive     | 0 | 1 | 1 | 0 | 1 | 0 |
| 150741 | YQLAVITMA         | NS2a | 1157 | 1165 | HLA-A*02:01 | 81% <100% | Dengue virus 2 | ELISPOT     | IFNg release | Positive     | 0 | 1 | 1 | 0 | 1 | 0 |
| 183741 | ILCVPNAVIL        | NS2a | 1279 | 1288 | HLA-B*08:01 | 81% <100% | Dengue virus 2 | ELISPOT     | IFNg release | Positive     | 0 | 1 | 1 | 0 | 1 | 0 |
| 183825 | IPALATIKGL        | NS2a | 1319 | 1328 | HLA-B*08:01 | 81% <100% | Dengue virus 2 | ELISPOT     | IFNg release | Positive     | 0 | 1 | 1 | 0 | 1 | 0 |
| 184864 | MLRTRVGTK         | NS2a | 1149 | 1157 | HLA-B*08:01 | 81% <100% | Dengue virus 2 | ELISPOT     | IFNg release | Positive     | 0 | 1 | 1 | 0 | 1 | 0 |
| 150101 | AAAWVWEV          | NS2b | 1463 | 1471 | HLA-A*02:01 | 81% <100% | Dengue virus 2 | ELISPOT     | IFNg release | Positive     | 0 | 1 | 1 | 0 | 1 | 0 |
| 150243 | GLLTVCYVL         | NS2b | 1381 | 1389 | HLA-A*02:01 | 81% <100% | Dengue virus 2 | ELISPOT     | IFNg release | Positive     | 0 | 1 | 1 | 0 | 1 | 0 |
| 150381 | LLVSGFLPV         | NS2b | 1448 | 1457 | HLA-A*02:01 | 81% <100% | Dengue virus 2 | ELISPOT     | IFNg release | Positive     | 0 | 1 | 1 | 0 | 1 | 0 |
| 150425 | LVISGLFPV         | NS2b | 1449 | 1457 | HLA-A*02:01 | 81% <100% | Dengue virus 2 | ELISPOT     | IFNg release | Positive     | 0 | 1 | 1 | 0 | 1 | 0 |
| 150584 | SPILSTISE         | NS2b | 1416 | 1425 | HLA-B*35:01 | 81% <100% | Dengue virus 2 | ELISPOT     | IFNg release | Positive     | 0 | 1 | 1 | 0 | 1 | 0 |
| 150610 | TAAAWVLWEV        | NS2b | 117  | 126  | HLA-A*02:01 | 81% <100% | Dengue virus 2 | ELISPOT     | IFNg release | Positive     | 0 | 1 | 1 | 0 | 1 | 0 |
| 180529 | IPITAAWV          | NS2b | 1459 | 1467 | HLA-B*35:01 | 81% <100% | Dengue virus 2 | ELISPOT     | IFNg release | Positive     | 0 | 1 | 1 | 0 | 1 | 0 |
| 180538 | ISGLFPVSPITAAA    | NS2b | 106  | 120  | HLA class I | 81% <100% | Dengue virus 2 | ICS         | IFNg release | Positive     | 0 | 1 | 1 | 0 | 1 | 0 |
| 183819 | IPITAAWVYL        | NS2b | 1459 | 1468 | HLA-B*08:01 | 81% <100% | Dengue virus 2 | ELISPOT     | IFNg release | Positive     | 0 | 1 | 1 | 0 | 1 | 0 |
| 11063  | EAHFTDPASIAARGY   | NS3  | 285  | 299  | HLA class I | 81% <100% | Dengue virus 2 | ELISPOT     | IFNg release | Positive     | 0 | 1 | 1 | 0 | 1 | 0 |
| 150450 | MPVTHSSAA         | NS3  | 1922 | 1930 | HLA-B*08:01 | 81% <100% | Dengue virus 2 | ELISPOT     | IFNg release | Positive     | 0 | 1 | 1 | 0 | 1 | 0 |
| 150451 | MPVTHSSAAQ        | NS3  | 1922 | 1931 | HLA-B*35:01 | 81% <100% | Dengue virus 2 | ELISPOT     | IFNg release | Positive     | 0 | 1 | 1 | 0 | 1 | 0 |
| 180611 | LMRRGDLPPWLAYRV   | NS3  | 2011 | 2025 | HLA-B*55:02 | 81% <100% | Dengue virus 2 | ICS         | IFNg release | Positive     | 0 | 0 | 1 | 0 | 1 | 0 |
| 180625 | LPVWLAYRV         | NS3  | 2017 | 2025 | HLA-B*51:01 | 81% <100% | Dengue virus 2 | ELISPOT     | IFNg release | Positive     | 0 | 0 | 1 | 0 | 1 | 0 |
| 180626 | LPVWLAYRVA        | NS3  | 2017 | 2026 | HLA-B*51:01 | 81% <100% | Dengue virus 2 | ELISPOT     | IFNg release | Positive     | 0 | 0 | 1 | 0 | 1 | 0 |
| 180756 | STRVEMGEAAGFMT    | NS3  | 301  | 315  | HLA-B*40:06 | 81% <100% | Dengue virus 2 | ELISPOT     | IFNg release | Positive-Low | 0 | 1 | 1 | 0 | 1 | 0 |
| 185388 | RIKQKGLIGY        | NS3  | 1499 | 1508 | HLA-B*15:01 | 81% <100% | Dengue virus 2 | ELISPOT     | IFNg release | Positive     | 0 | 1 | 1 | 0 | 1 | 0 |
| 186242 | VENMGEAAGF        | NS3  | 1779 | 1788 | HLA-B*44:03 | 81% <100% | Dengue virus 2 | ELISPOT     | IFNg release | Positive     | 0 | 1 | 1 | 0 | 1 | 0 |
| 22823  | GTSGSPVDK         | NS3  | 133  | 142  | HLA-A11     | 81% <100% | Dengue virus 2 | 51 chromium | cytotoxicity | Positive     | 0 | 0 | 0 | 0 | 0 | 0 |
| 54176  | RIKQKGL           | NS3  | 1499 | 1506 | HLA-B8      | 81% <100% | Dengue virus 2 | ELISPOT     | IFNg release | Positive     | 0 | 1 | 1 | 0 | 1 | 0 |
| 8910   | DKKGRVGL          | NS3  | 1616 | 1624 | HLA-B8      | 81% <100% | Dengue virus 2 | ELISPOT     | IFNg release | Positive     | 0 | 1 | 1 | 0 | 1 | 0 |
| 150461 | MTQKARNAL         | NS4a | 2110 | 2118 | HLA-B*07:02 | 81% <100% | Dengue virus 2 | ELISPOT     | IFNg release | Positive     | 0 | 0 | 0 | 0 | 0 | 0 |
| 150612 | TAEAGRAY          | NS4a | 2126 | 2134 | HLA-B*35:01 | 81% <100% | Dengue virus 2 | ELISPOT     | IFNg release | Positive     | 0 | 1 | 1 | 0 | 1 | 0 |
| 150752 | VYVAILTV          | NS4a | 2229 | 2237 | HLA-A*02:01 | 81% <100% | Dengue virus 2 | ELISPOT     | IFNg release | Positive     | 0 | 1 | 1 | 0 | 1 | 0 |
| 150753 | VYVAILTVV         | NS4a | 2229 | 2238 | HLA-A*02:01 | 81% <100% | Dengue virus 2 | ELISPOT     | IFNg release | Positive     | 0 | 1 | 1 | 0 | 1 | 0 |
| 185447 | RNALDNLAIL        | NS4a | 2115 | 2124 | HLA-B*08:01 | 81% <100% | Dengue virus 2 | ELISPOT     | IFNg release | Positive     | 0 | 0 | 0 | 0 | 0 | 0 |
| 151562 | QDLYVAIL          | NS4a | 2226 | 2235 | HLA-B*08:01 | 81% <100% | Dengue virus 2 | ELISPOT     | IFNg release | Positive     | 0 | 1 | 1 | 0 | 1 | 0 |
| 150377 | LLLVAHYAI         | NS4b | 2355 | 2363 | HLA-A*02:01 | 81% <100% | Dengue virus 2 | ELISPOT     | IFNg release | Positive     | 0 | 1 | 0 | 0 | 0 | 0 |
| 150389 | LMWRTWAL          | NS4b | 2425 | 2433 | HLA-B*08:01 | 81% <100% | Dengue virus 2 | ELISPOT     | IFNg release | Positive     | 0 | 1 | 1 | 0 | 1 | 0 |
| 150686 | VLMRMTTWA         | NS4b | 2424 | 2432 | HLA-B*08:01 | 81% <100% | Dengue virus 2 | ELISPOT     | IFNg release | Positive     | 0 | 1 | 1 | 0 | 1 | 0 |
| 180380 | ATGPISLW          | NS4b | 2440 | 2448 | HLA-B*58:01 | 81% <100% | Dengue virus 2 | ELISPOT     | IFNg release | Positive     | 0 | 1 | 1 | 0 | 1 | 0 |
| 180387 | CEALTALTGPISTLW   | NS4b | 191  | 205  | HLA class I | 81% <100% | Dengue virus 2 | ELISPOT     | IFNg release | Positive     | 0 | 1 | 1 | 0 | 1 | 0 |
| 180802 | VPLLAGCY          | NS4b | 2334 | 2342 | HLA-B*35:01 | 81% <100% | Dengue virus 2 | ELISPOT     | IFNg release | Positive     | 0 | 1 | 1 | 0 | 1 | 0 |
| 182747 | CYSQVNPITL        | NS4b | 2341 | 2350 | HLA-A*24:02 | 81% <100% | Dengue virus 2 | ELISPOT     | IFNg release | Positive     | 0 | 1 | 1 | 0 | 1 | 0 |
| 183670 | I                 |      |      |      |             |           |                |             |              |              |   |   |   |   |   |   |



|        |                  |      |      |      |             |           |                |                   |                     |          |   |   |   |   |   |   |
|--------|------------------|------|------|------|-------------|-----------|----------------|-------------------|---------------------|----------|---|---|---|---|---|---|
| 180433 | EPGQLKLNWF       | E    | 663  | 672  | HLA-B*35:01 | >0% - 50% | Dengue virus 2 | ELISPOT           | IFNγ release        | Positive | 1 | 0 | 1 | 1 | 1 | 1 |
| 184467 | LLQMEDKAWL       | E    | 478  | 487  | HLA-B*08:01 | >0% - 50% | Dengue virus 2 | ELISPOT           | IFNγ release        | Positive | 0 | 0 | 0 | 0 | 0 | 0 |
| 150300 | ILLVAVSFV        | NS2a | 1146 | 1154 | HLA-A*02:01 | >0% - 50% | Dengue virus 2 | ELISPOT           | IFNγ release        | Positive | 0 | 1 | 1 | 0 | 1 | 0 |
| 150640 | TMTDDIGMGV       | NS2a | 1176 | 1185 | HLA-A*02:01 | >0% - 50% | Dengue virus 2 | ELISPOT           | IFNγ release        | Positive | 0 | 1 | 1 | 0 | 1 | 0 |
| 180717 | RDLGRVMVMVGATMT  | NS2a | 51   | 65   | HLA class I | >0% - 50% | Dengue virus 2 | ICS               | IFNγ release        | Positive | 0 | 0 | 1 | 0 | 1 | 0 |
| 180735 | RVGTRKHAILLVAVSF | NS2a | 1153 | 1167 | HLA class I | >0% - 50% | Dengue virus 2 | ICS               | IFNγ release        | Positive | 0 | 1 | 1 | 0 | 1 | 0 |
| 186041 | TRVGTCKHAIL      | NS2a | 1152 | 1161 | HLA-B*08:01 | >0% - 50% | Dengue virus 2 | ELISPOT           | IFNγ release        | Positive | 0 | 1 | 1 | 0 | 1 | 0 |
| 10643  | DVKKDLISY        | NS3  | 71   | 79   | HLA-B62     | >0% - 50% | Dengue virus 2 | 51 chromium       | cytotoxicity        | Positive | 0 | 1 | 1 | 0 | 1 | 0 |
| 150346 | KTFDSEYVK        | NS3  | 1863 | 1871 | HLA-A*11:01 | >0% - 50% | Dengue virus 2 | multimer/tetramer | qualitative binding | Positive | 0 | 1 | 1 | 0 | 1 | 0 |
| 17802  | FSPGTSGSPIIDKKG  | NS3  | 130  | 144  | HLA class I | >0% - 50% | Dengue virus 2 | ELISPOT           | IFNγ release        | Positive | 0 | 1 | 1 | 0 | 1 | 0 |
| 180623 | LPVWLAYKV        | NS3  | 2017 | 2025 | HLA-B*51:01 | >0% - 50% | Dengue virus 2 | ELISPOT           | IFNγ release        | Positive | 0 | 1 | 1 | 0 | 0 | 0 |
| 180624 | LPVWLAYKVA       | NS3  | 2017 | 2026 | HLA-B*51:01 | >0% - 50% | Dengue virus 2 | ELISPOT           | IFNγ release        | Positive | 0 | 1 | 1 | 0 | 0 | 0 |
| 180750 | SPGTSGSPIIDKKGK  | NS3  | 131  | 145  | HLA-A*11:01 | >0% - 50% | Dengue virus 2 | ELISPOT           | IFNγ release        | Positive | 0 | 1 | 1 | 0 | 1 | 0 |
| 22818  | GTSGPSIIDK       | NS3  | 133  | 142  | HLA-A*11:01 | >0% - 50% | Dengue virus 2 | ELISPOT           | IFNγ release        | Positive | 0 | 1 | 1 | 0 | 1 | 0 |
| 22819  | GTSGPSIIDKK      | NS3  | 133  | 143  | HLA-A11     | >0% - 50% | Dengue virus 2 | 51 chromium       | cytotoxicity        | Positive | 0 | 1 | 1 | 0 | 1 | 0 |
| 25929  | IEPSWADVKKDLISY  | NS3  | 65   | 79   | HLA class I | >0% - 50% | Dengue virus 2 | ELISPOT           | IFNγ release        | Positive | 0 | 1 | 1 | 0 | 1 | 0 |
| 790    | ADVKKDLISYGGGWK  | NS3  | 70   | 84   | HLA class I | >0% - 50% | Dengue virus 2 | ELISPOT           | IFNγ release        | Positive | 0 | 1 | 1 | 0 | 1 | 0 |
| 16757  | FLLVAHYAI        | NS4b | 112  | 120  | HLA-A2      | >0% - 50% | Dengue virus 2 | ICS               | TNF release         | Positive | 0 | 0 | 1 | 0 | 1 | 0 |
| 35568  | LETKKDL          | NS4b | 2249 | 2256 | HLA-B8      | >0% - 50% | Dengue virus 2 | ELISPOT           | IFNγ release        | Positive | 0 | 1 | 1 | 0 | 1 | 0 |
| 150554 | RTTWSIAK         | NS5  | 3283 | 3291 | HLA-A*11:01 | >0% - 50% | Dengue virus 2 | ELISPOT           | IFNγ release        | Positive | 0 | 1 | 1 | 0 | 1 | 0 |
| 161186 | RLTTKPWDVVPMTQ   | NS5  | 326  | 340  | HLA-B*55:02 | >0% - 50% | Dengue virus 2 | ICS               | IFNγ release        | Positive | 0 | 1 | 1 | 0 | 1 | 0 |
| 180681 | NEEYTDYMPMSMKRFR | NS5  | 3367 | 3381 | HLA class I | >0% - 50% | Dengue virus 2 | ELISPOT           | IFNγ release        | Positive | 0 | 1 | 1 | 0 | 1 | 0 |
| 182855 | EAVEDGRFWE       | NS5  | 2915 | 2924 | HLA-B*58:01 | >0% - 50% | Dengue virus 2 | ELISPOT           | IFNγ release        | Positive | 0 | 0 | 0 | 0 | 0 | 0 |
| 186219 | VEDGRFWEL        | NS5  | 2917 | 2925 | HLA-B*40:01 | >0% - 50% | Dengue virus 2 | ELISPOT           | IFNγ release        | Positive | 0 | 0 | 0 | 0 | 0 | 0 |
| 32943  | KPWVDVPMV        | NS5  | 2821 | 2829 | HLA-B*51:01 | >0% - 50% | Dengue virus 2 | 51 chromium       | cytotoxicity        | Positive | 0 | 1 | 1 | 0 | 1 | 0 |
| 74305  | YILRDVSKK        | NS5  | 517  | 525  | HLA class I | >0% - 50% | Dengue virus 2 | ELISPOT           | IFNγ release        | Positive | 0 | 1 | 1 | 0 | 1 | 0 |



CD8 DENV-3 Epitopes

| Epitope_ID | AA_Seq           | Protein_Name | Start | End  | Allele      | Step       | Serotype       | Method/Technique    | Assay Group   | Qualitative Measure | DENV-3 constructs of vaccines (100% identity=1, green ; else 0, red) |      |      |           |        |       |
|------------|------------------|--------------|-------|------|-------------|------------|----------------|---------------------|---------------|---------------------|----------------------------------------------------------------------|------|------|-----------|--------|-------|
|            |                  |              |       |      |             |            |                |                     |               |                     | TV003                                                                | TDEN | DPV1 | Dengvaxia | DENVax | TV DV |
| 180390     | CLMMMLPATL       | C            | 104   | 113  | HLA-A*02:01 | 0%         | Dengue virus 3 | ELISPOT             | IFNg release  | Positive            | 1                                                                    | 1    | 1    | 0         | 0      | 0     |
| 180609     | LMMMLPATL        | C            | 105   | 113  | HLA-A*02:01 | 0%         | Dengue virus 3 | ELISPOT             | IFNg release  | Positive            | 1                                                                    | 1    | 1    | 0         | 0      | 0     |
| 183793     | IMKIGIGVL        | E            | 452   | 461  | HLA-B*08:01 | 0%         | Dengue virus 3 | ELISPOT             | IFNg release  | Positive            | 1                                                                    | 1    | 1    | 1         | 0      | 1     |
| 184412     | LKGMYSAMCL       | E            | 156   | 165  | HLA-B*08:01 | 0%         | Dengue virus 3 | ELISPOT             | IFNg release  | Positive            | 1                                                                    | 1    | 1    | 1         | 1      | 1     |
| 186470     | WIMKIGIGVL       | E            | 451   | 460  | HLA-B*08:01 | 0%         | Dengue virus 3 | ELISPOT             | IFNg release  | Positive            | 1                                                                    | 1    | 1    | 1         | 0      | 1     |
| 185464     | RPINKEENM        | NS1          | 1109  | 1118 | HLA-B*35:01 | 0%         | Dengue virus 3 | ELISPOT             | IFNg release  | Positive            | 1                                                                    | 1    | 1    | 0         | 0      | 0     |
| 183395     | GKKHMIAGVL       | NS2a         | 1153  | 1162 | HLA-B*08:01 | 0%         | Dengue virus 3 | ELISPOT             | IFNg release  | Positive            | 1                                                                    | 0    | 1    | 0         | 0      | 0     |
| 3124       | AMKGLPIRY        | NS3          | 1708  | 1716 | HLA-B62     | 0%         | Dengue virus 3 | 51 chromium         | cytotoxicity  | Positive            | 0                                                                    | 0    | 0    | 0         | 0      | 0     |
| 590435     | TRVVAEMEEAMKGLPI | NS3          | 1698  | 1714 | HLA class I | 0%         | Dengue virus 3 | ICS                 | IFNg release  | Positive-Low        | 0                                                                    | 0    | 0    | 0         | 0      | 0     |
| 180572     | KPRLCTREEF       | NS5          | 2879  | 2888 | HLA-B*07:02 | 0%         | Dengue virus 3 | ELISPOT             | IFNg release  | Positive            | 0                                                                    | 0    | 0    | 0         | 0      | 0     |
| 180801     | VMGITAEVWLW      | NS5          | 2862  | 2871 | HLA-B*53:01 | 0%         | Dengue virus 3 | ELISPOT             | IFNg release  | Positive            | 0                                                                    | 0    | 0    | 0         | 0      | 0     |
| 186127     | TTWEDVPYL        | NS5          | 3321  | 3329 | HLA-A*02:01 | 0%         | Dengue virus 3 | ELISPOT             | IFNg release  | Positive            | 0                                                                    | 1    | 0    | 0         | 0      | 0     |
| 32944      | KPWVDVPTV        | NS5          | 2819  | 2827 | HLA class I | 0%         | Dengue virus 3 | 51 chromium         | cytotoxicity  | Positive            | 0                                                                    | 0    | 0    | 0         | 0      | 0     |
| 180464     | FTLALFLAH        | PreM         | 247   | 256  | HLA-B*35:01 | 100%       | Dengue virus 3 | ELISPOT             | IFNg release  | Positive            | 1                                                                    | 1    | 1    | 1         | 1      | 1     |
| 180504     | HPGFTILALF       | PreM         | 244   | 253  | HLA-B*35:01 | 100%       | Dengue virus 3 | ELISPOT             | IFNg release  | Positive            | 1                                                                    | 1    | 1    | 1         | 1      | 1     |
| 185685     | SLFKTASG         | PreM         | 136   | 144  | HLA-B*08:01 | 100%       | Dengue virus 3 | ELISPOT             | IFNg release  | Positive            | 1                                                                    | 1    | 1    | 1         | 1      | 1     |
| 180613     | LPEDGDNY         | E            | 82    | 90   | HLA-B*35:01 | 100%       | Dengue virus 3 | ELISPOT             | IFNg release  | Positive            | 0                                                                    | 1    | 0    | 1         | 1      | 1     |
| 180657     | MLVTPSMTM        | E            | 273   | 281  | HLA-B*35:01 | 100%       | Dengue virus 3 | ELISPOT             | IFNg release  | Positive            | 1                                                                    | 0    | 1    | 0         | 0      | 0     |
| 183843     | IQNSGGTSIF       | E            | 131   | 140  | HLA-B*15:01 | 100%       | Dengue virus 3 | ELISPOT             | IFNg release  | Positive            | 0                                                                    | 1    | 0    | 1         | 0      | 0     |
| 184299     | LATLRLKLCI       | E            | 53    | 61   | HLA-B*08:01 | 100%       | Dengue virus 3 | ELISPOT             | IFNg release  | Positive            | 1                                                                    | 1    | 1    | 1         | 1      | 1     |
| 184536     | LPFYTLGLE        | E            | 453   | 462  | HLA-B*35:01 | 100%       | Dengue virus 3 | ELISPOT             | IFNg release  | Positive            | 1                                                                    | 1    | 1    | 1         | 1      | 1     |
| 185419     | RLKMDKLEL        | E            | 148   | 156  | HLA-B*08:01 | 100%       | Dengue virus 3 | ELISPOT             | IFNg release  | Positive            | 1                                                                    | 1    | 1    | 1         | 1      | 0     |
| 180537     | RPGYHTQTA        | NS1          | 1030  | 1038 | HLA-B*07:02 | 100%       | Dengue virus 3 | ELISPOT             | IFNg release  | Positive            | 1                                                                    | 1    | 1    | 0         | 0      | 0     |
| 180546     | RSTCLPPLRY       | NS1          | 1087  | 1096 | HLA-A*01:01 | 100%       | Dengue virus 3 | ELISPOT             | IFNg release  | Positive            | 1                                                                    | 1    | 1    | 0         | 0      | 0     |
| 180738     | RYMGEDGCWY       | NS1          | 1095  | 1104 | HLA-A*24:02 | 100%       | Dengue virus 3 | ELISPOT             | IFNg release  | Positive            | 1                                                                    | 1    | 1    | 0         | 0      | 0     |
| 182939     | EKENMMVSL        | NS1          | 1113  | 1122 | HLA-B*08:01 | 100%       | Dengue virus 3 | ELISPOT             | IFNg release  | Positive            | 1                                                                    | 1    | 1    | 0         | 0      | 0     |
| 184585     | LRTITVSGKL       | NS1          | 64    | 73   | HLA-B*08:01 | 100%       | Dengue virus 3 | ELISPOT             | IFNg release  | Positive            | 1                                                                    | 1    | 1    | 0         | 0      | 0     |
| 185573     | RYMGEDGCW        | NS1          | 1095  | 1103 | HLA-A*24:02 | 100%       | Dengue virus 3 | ELISPOT             | IFNg release  | Positive            | 1                                                                    | 1    | 1    | 0         | 0      | 0     |
| 185734     | SPKRLATAI        | NS1          | 811   | 819  | HLA-B*08:01 | 100%       | Dengue virus 3 | ELISPOT             | IFNg release  | Positive            | 1                                                                    | 1    | 1    | 0         | 0      | 0     |
| 186175     | TWRDMHTLI        | NS2a         | 1174  | 1183 | HLA-A*24:02 | 100%       | Dengue virus 3 | ELISPOT             | IFNg release  | Positive            | 1                                                                    | 1    | 1    | 0         | 0      | 0     |
| 182917     | EKFDAAGR         | NS3          | 2083  | 2091 | HLA-A*33:01 | 100%       | Dengue virus 3 | ELISPOT             | IFNg release  | Positive            | 1                                                                    | 1    | 1    | 0         | 0      | 0     |
| 186234     | VEIWTKEGK        | NS3          | 2053  | 2062 | HLA-B*40:01 | 100%       | Dengue virus 3 | ELISPOT             | IFNg release  | Positive            | 1                                                                    | 1    | 1    | 0         | 0      | 0     |
| 19434      | GESRKTFFE        | NS3          | 2001  | 2009 | HLA-B7      | 100%       | Dengue virus 3 | 51 chromium         | cytotoxicity  | Positive            | 1                                                                    | 1    | 1    | 0         | 0      | 0     |
| 19435      | GESRKTFFEL       | NS3          | 211   | 220  | HLA-B*40:01 | 100%       | Dengue virus 3 | ICS                 | IFNg release  | Positive            | 1                                                                    | 1    | 1    | 0         | 0      | 0     |
| 22820      | GTSGSPIINR       | NS3          | 133   | 142  | HLA-A*11:01 | 100%       | Dengue virus 3 | 51 chromium         | cytotoxicity  | Positive            | 1                                                                    | 1    | 1    | 0         | 0      | 0     |
| 22821      | GTSGSPIINRE      | NS3          | 133   | 143  | HLA-A11     | 100%       | Dengue virus 3 | ICS                 | IFNg release  | Positive            | 1                                                                    | 1    | 1    | 0         | 0      | 0     |
| 34605      | KYDRKWCF         | NS3          | 240   | 248  | HLA-A24     | 100%       | Dengue virus 3 | ELISPOT             | IFNg release  | Positive            | 1                                                                    | 1    | 1    | 0         | 0      | 0     |
| 62183      | SVKDLISY         | NS3          | 71    | 79   | HLA-B62     | 100%       | Dengue virus 3 | 51 chromium         | cytotoxicity  | Positive            | 1                                                                    | 1    | 1    | 0         | 0      | 0     |
| 183165     | IFNMMLPIPE       | NS4a         | 2205  | 2214 | HLA-A*33:01 | 100%       | Dengue virus 3 | ELISPOT             | IFNg release  | Positive            | 1                                                                    | 1    | 1    | 0         | 0      | 0     |
| 183796     | IMKSVGTGK        | NS4b         | 2481  | 2489 | HLA-A*03:01 | 100%       | Dengue virus 3 | ELISPOT             | IFNg release  | Positive            | 1                                                                    | 1    | 1    | 0         | 0      | 0     |
| 37534      | LLLMLRTSWA       | NS4b         | 2423  | 2431 | HLA-A2      | 100%       | Dengue virus 3 | biological activity | proliferation | Positive            | 1                                                                    | 1    | 1    | 0         | 0      | 0     |
| 180650     | KPIDDFAN         | NS5          | 3158  | 3166 | HLA-B*07:02 | 100%       | Dengue virus 3 | ELISPOT             | IFNg release  | Positive            | 1                                                                    | 1    | 1    | 0         | 0      | 0     |
| 180650     | MEITAEWLW        | NS5          | 2863  | 2871 | HLA-B*58:01 | 100%       | Dengue virus 3 | ELISPOT             | IFNg release  | Positive            | 1                                                                    | 1    | 1    | 0         | 0      | 0     |
| 180728     | RPRLCTREEF       | NS5          | 2879  | 2888 | HLA-B*07:02 | 100%       | Dengue virus 3 | ELISPOT             | IFNg release  | Positive            | 1                                                                    | 1    | 1    | 0         | 0      | 0     |
| 182553     | ALLALNDMGK       | NS5          | 3167  | 3176 | HLA-A*03:01 | 100%       | Dengue virus 3 | ELISPOT             | IFNg release  | Positive            | 1                                                                    | 1    | 1    | 0         | 0      | 0     |
| 185710     | SMINGVVKL        | NS5          | 318   | 326  | HLA-A*02:01 | 100%       | Dengue virus 3 | ELISPOT             | IFNg release  | Positive            | 1                                                                    | 1    | 1    | 0         | 0      | 0     |
| 180577     | KSGAIKVLK        | C            | 74    | 82   | HLA-A*11:01 | 81% <-100% | Dengue virus 3 | ELISPOT             | IFNg release  | Positive            | 0                                                                    | 1    | 0    | 0         | 0      | 0     |
| 184260     | LAIPPTAGVL       | C            | 57    | 66   | HLA-B*08:01 | 81% <-100% | Dengue virus 3 | ELISPOT             | IFNg release  | Positive            | 1                                                                    | 1    | 1    | 0         | 0      | 0     |
| 184845     | MLKRVNRV         | C            | 15    | 23   | HLA-B*08:01 | 81% <-100% | Dengue virus 3 | ELISPOT             | IFNg release  | Positive            | 1                                                                    | 1    | 1    | 0         | 0      | 0     |
| 184658     | LTKQVIFIL        | PreM         | 262   | 271  | HLA-B*08:01 | 81% <-100% | Dengue virus 3 | ELISPOT             | IFNg release  | Positive            | 1                                                                    | 1    | 1    | 1         | 1      | 1     |
| 13119      | ELKGMYSAM        | E            | 155   | 163  | HLA-B*08:01 | 81% <-100% | Dengue virus 3 | ELISPOT             | IFNg release  | Positive            | 1                                                                    | 1    | 1    | 1         | 1      | 0     |
| 15796      | FFDLPLPWT        | E            | 211   | 219  | HLA-A2      | 81% <-100% | Dengue virus 3 | ICS                 | IFNg release  | Positive            | 1                                                                    | 1    | 1    | 1         | 1      | 1     |
| 184568     | LPWTSAGAT        | E            | 496   | 504  | HLA-B*35:01 | 81% <-100% | Dengue virus 3 | ELISPOT             | IFNg release  | Positive            | 1                                                                    | 1    | 1    | 1         | 0      | 1     |
| 184924     | MSYAMCTNTF       | E            | 575   | 584  | HLA-B*35:01 | 81% <-100% | Dengue virus 3 | ELISPOT             | IFNg release  | Positive            | 0                                                                    | 0    | 0    | 0         | 0      | 0     |
| 184965     | MVHQIFGSAY       | E            | 713   | 722  | HLA-B*15:01 | 81% <-100% | Dengue virus 3 | ELISPOT             | IFNg release  | Positive            | 1                                                                    | 1    | 1    | 1         | 1      | 1     |
| 186029     | TPTWNRKEL        | E            | 226   | 234  | HLA-B*07:02 | 81% <-100% | Dengue virus 3 | ELISPOT             | IFNg release  | Positive-Low        | 0                                                                    | 1    | 0    | 1         | 1      | 1     |
| 589817     | SGATWVDVLEHGGCV  | E            | 268   | 283  | HLA class I | 81% <-100% | Dengue virus 3 | ICS                 | IFNg release  | Positive-High       | 1                                                                    | 1    | 1    | 1         | 1      | 1     |
| 184254     | LAILFEEMV        | NS2a         | 1140  | 1148 | HLA-B*35:01 | 81% <-100% | Dengue virus 3 | ELISPOT             | IFNg release  | Positive            | 1                                                                    | 1    | 1    | 0         | 0      | 0     |
| 185978     | TMGVLCILAL       | NS2a         | 1134  | 1143 | HLA-B*08:01 | 81% <-100% | Dengue virus 3 | ELISPOT             | IFNg release  | Positive            | 1                                                                    | 0    | 1    | 0         | 0      | 0     |
| 180622     | LPVLAHKVA        | NS3          | 226   | 235  | HLA-B*35:01 | 81% <-100% | Dengue virus 3 | ELISPOT             | IFNg release  | Positive            | 1                                                                    | 1    | 1    | 0         | 0      | 0     |
| 184065     | KLNDWDFV         | NS3          | 399   | 407  | HLA-A*02:01 | 81% <-100% | Dengue virus 3 | ELISPOT             | IFNg release  | Positive-High       | 1                                                                    | 1    | 1    | 0         | 0      | 0     |
| 37494      | LLGLMLLL         | NS4a         | 2148  | 2156 | HLA-A2      | 81% <-100% | Dengue virus 3 | ICS                 | IFNg release  | Positive            | 1                                                                    | 1    | 1    | 0         | 0      | 0     |
| 180381     | ATGPITTLW        | NS4b         | 2439  | 2447 | HLA-B*58:01 | 81% <-100% | Dengue virus 3 | ELISPOT             | IFNg release  | Positive            | 1                                                                    | 1    | 1    | 0         | 0      | 0     |
| 180788     | TKRDLGMSK        | NS4b         | 2250  | 2259 | HLA-A*11:01 | 81% <-100% | Dengue virus 3 | ELISPOT             | IFNg release  | Positive            | 1                                                                    | 1    | 1    | 0         | 0      | 0     |
| 180737     | RYLEFALGF        | NS5          | 2971  | 2980 | HLA-A*24:02 | 81% <-100% | Dengue virus 3 | ELISPOT             | IFNg release  | Positive            | 1                                                                    | 1    | 1    | 0         | 0      | 0     |
| 183587     | HMIAGVFFTF       | NS2a         | 368   | 377  | HLA-A*24:02 | 51%-80%    | Dengue virus 3 | ELISPOT             | IFNg release  | Positive            | 0                                                                    | 0    | 0    | 0         | 0      | 0     |
| 184819     | MIAGVFFTF        | NS2a         | 369   | 377  | HLA-B*35:01 | 51%-80%    | Dengue virus 3 | ELISPOT             | IFNg release  | Positive            | 0                                                                    | 0    | 0    | 0         | 0      | 0     |
| 180678     | MVSRLLNLR        | NS5          | 2723  | 2731 | HLA-A*11:01 | 51%-80%    | Dengue virus 3 | ELISPOT             | IFNg release  | Positive            | 1                                                                    | 1    | 1    | 0         | 0      | 0     |
| 184264     | LAKRFSRGL        | C            | 29    | 37   | HLA-B*08:01 | >0% -50%   | Dengue virus 3 | ELISPOT             | IFNg release  | Positive            | 1                                                                    | 1    | 1    | 0         | 0      | 0     |
| 184265     | LAKRFSRGLL       | C            | 29    | 38   | HLA-B*08:01 | >0% -50%   | Dengue virus 3 | ELISPOT             | IFNg release  | Positive            | 1                                                                    | 1    | 1    | 0         | 0      | 0     |
| 185260     | QLAKRFSRG        | C            | 28    | 36   | HLA-B*08:01 | >0% -50%   | Dengue virus 3 | ELISPOT             | IFNg release  | Positive            | 1                                                                    | 1    | 1    | 0         | 0      | 0     |
| 183723     | IKLTVVVDI        | NS1          | 857   | 866  | HLA-B*08:01 | >0% -50%   | Dengue virus 3 | ELISPOT             | IFNg release  | Positive            | 1                                                                    | 1    | 1    | 0         | 0      | 0     |
| 69612      | VLLLVTHYA        | NS4b         | 2353  | 2361 | HLA-A2      | >0% -50%   | Dengue virus 3 | ICS                 | IFNg release  | Positive            | 1                                                                    | 0    | 1    | 0         | 0      | 0     |
| 186215     | VEDEDFWKL        | NS5          | 2915  | 2923 | HLA-B*40:01 | >0% -50%   | Dengue virus 3 | ELISPOT             | IFNg release  | Positive            | >0                                                                   | 0    | 0    | 0         | 0      | 0     |



## CD8 DENV-4 Epitopes

| Epitope_ID | AA_Seq              | Protein_Name | Start | End  | Allele      | Step        | Serotype       | Method/Technique         | Assay Group  | Qualitative Measure | DENV-4 constructs of vaccines (100% identity=1, green ; else 0, red) |      |      |           |        |      |
|------------|---------------------|--------------|-------|------|-------------|-------------|----------------|--------------------------|--------------|---------------------|----------------------------------------------------------------------|------|------|-----------|--------|------|
|            |                     |              |       |      |             |             |                |                          |              |                     | TV003                                                                | TDEN | DPIV | Dengvaxia | DENVax | TVDV |
| 180810     | VTYECPLLV           | PreM         | 162   | 170  | HLA-A*02:01 | 0%          | Dengue virus 4 | ELISPOT                  | IFNg release | Positive            | 0                                                                    | 0    | 0    | 0         | 0      | 1    |
| 182707     | CNLTSTWVMY          | PreM         | 181   | 190  | HLA-A*30:02 | 0%          | Dengue virus 4 | ELISPOT                  | IFNg release | Positive            | 1                                                                    | 1    | 1    | 0         | 1      | 0    |
| 186303     | VLMMLVAPSY          | PreM         | 17    | 26   | HLA-B*15:01 | 0%          | Dengue virus 4 | ELISPOT                  | IFNg release | Positive            | 1                                                                    | 1    | 1    | 0         | 1      | 1    |
| 185147     | NYKERMVTF           | E            | 511   | 519  | HLA-A*24:02 | 0%          | Dengue virus 4 | ELISPOT                  | IFNg release | Positive            | 1                                                                    | 1    | 1    | 1         | 1      | 1    |
| 185817     | SWMIRLIGF           | E            | 161   | 170  | HLA-A*24:02 | 0%          | Dengue virus 4 | ELISPOT                  | IFNg release | Positive            | 1                                                                    | 1    | 1    | 0         | 1      | 0    |
| 240130     | PPASDLKYSW          | NS1          | 880   | 889  | HLA-B*53:01 | 0%          | Dengue virus 4 | ELISPOT                  | IFNg release | Positive            | 0                                                                    | 0    | 0    | 0         | 0      | 0    |
| 167725     | AMTTLSIPHDLMELIDGIS | NS2a         | 50    | 69   | HLA class I | 0%          | Dengue virus 4 | ELISPOT                  | IFNg release | Positive            | 0                                                                    | 0    | 0    | 0         | 0      | 0    |
| 239411     | ALWYVWQVK           | NS2b         | 1463  | 1471 | HLA-A*03:01 | 0%          | Dengue virus 4 | ELISPOT                  | IFNg release | Positive            | 0                                                                    | 0    | 0    | 0         | 0      | 0    |
| 418991     | IPVIMALWY           | NS2b         | 1458  | 1466 | HLA-B*35:01 | 0%          | Dengue virus 4 | ELISPOT                  | IFNg release | Positive            | 0                                                                    | 0    | 0    | 0         | 0      | 0    |
| 180640     | MALKDFKEF           | NS3          | 2079  | 2087 | HLA-B*35:01 | 0%          | Dengue virus 4 | ELISPOT                  | IFNg release | Positive            | 1                                                                    | 1    | 1    | 0         | 0      | 0    |
| 182563     | ALSEGVYRI           | NS3          | 1491  | 1499 | HLA-A*02:01 | 0%          | Dengue virus 4 | ELISPOT                  | IFNg release | Positive            | 1                                                                    | 1    | 1    | 0         | 0      | 0    |
| 186008     | TPPGATDPF           | NS3          | 1791  | 1799 | HLA-B*35:01 | 0%          | Dengue virus 4 | ELISPOT                  | IFNg release | Positive            | 1                                                                    | 1    | 1    | 0         | 0      | 0    |
| 186602     | YSDPLALRE           | NS3          | 2077  | 2085 | HLA-A*01:01 | 0%          | Dengue virus 4 | ELISPOT                  | IFNg release | Positive            | 0                                                                    | 0    | 0    | 0         | 0      | 0    |
| 239768     | GTSGSPIINK          | NS3          | 1607  | 1616 | HLA-A*03:01 | 0%          | Dengue virus 4 | ELISPOT                  | IFNg release | Positive            | 0                                                                    | 0    | 0    | 0         | 0      | 0    |
| 180383     | ATGPVLTLW           | NS4b         | 2436  | 2444 | HLA-B*58:01 | 0%          | Dengue virus 4 | ELISPOT                  | IFNg release | Positive            | 0                                                                    | 0    | 0    | 0         | 0      | 0    |
| 180587     | LATGPVLTLW          | NS4b         | 2435  | 2444 | HLA-B*53:01 | 0%          | Dengue virus 4 | ELISPOT                  | IFNg release | Positive            | 0                                                                    | 0    | 0    | 0         | 0      | 0    |
| 184375     | LKGSYAQMWW          | NS5          | 3246  | 3254 | HLA-B*57:01 | 0%          | Dengue virus 4 | ELISPOT                  | IFNg release | Positive            | 0                                                                    | 0    | 0    | 0         | 0      | 0    |
| 419017     | MPAMKRYASAP         | NS5          | 3371  | 3380 | HLA-B*35:01 | 0%          | Dengue virus 4 | ELISPOT                  | IFNg release | Positive            | 0                                                                    | 0    | 0    | 0         | 0      | 0    |
| 419048     | SPRLCTREEF          | NS5          | 2877  | 2886 | HLA-B*07:02 | 0%          | Dengue virus 4 | ELISPOT                  | IFNg release | Positive            | 0                                                                    | 0    | 0    | 0         | 0      | 0    |
| 182971     | EMCEDTVTV           | PreM         | 156   | 164  | HLA-B*35:01 | 100%        | Dengue virus 4 | ELISPOT                  | IFNg release | Positive            | 1                                                                    | 1    | 1    | 0         | 1      | 1    |
| 583701     | GVSGAVVVDLVLEHGCV   | E            | 14    | 31   | HLA class I | 100%        | Dengue virus 4 | ICS                      | IFNg release | Positive-Low        | 1                                                                    | 1    | 1    | 1         | 1      | 1    |
| 183667     | IGKASLIEV           | NS1          | 986   | 994  | HLA-B*40:01 | 100%        | Dengue virus 4 | ELISPOT                  | IFNg release | Positive            | 1                                                                    | 1    | 1    | 0         | 0      | 0    |
| 185050     | NFLEVEDYGF          | NS1          | 925   | 934  | HLA-A*24:02 | 100%        | Dengue virus 4 | ELISPOT                  | IFNg release | Positive            | 0                                                                    | 0    | 0    | 0         | 0      | 0    |
| 182562     | ALPVYLMTL           | NS2a         | 1329  | 1337 | HLA-A*02:01 | 100%        | Dengue virus 4 | ELISPOT                  | IFNg release | Positive            | 1                                                                    | 1    | 1    | 0         | 0      | 0    |
| 184566     | LPVYLMTLMK          | NS2a         | 1330  | 1339 | HLA-B*35:01 | 100%        | Dengue virus 4 | ELISPOT                  | IFNg release | Positive            | 1                                                                    | 1    | 1    | 0         | 0      | 0    |
| 182901     | ETLNMITLL           | NS2b         | 1434  | 1442 | HLA-B*40:01 | 100%        | Dengue virus 4 | ELISPOT                  | IFNg release | Positive            | 1                                                                    | 1    | 1    | 0         | 0      | 0    |
| 186584     | YPLAIPVTM           | NS2b         | 1454  | 1462 | HLA-B*53:01 | 100%        | Dengue virus 4 | ELISPOT                  | IFNg release | Positive            | 1                                                                    | 1    | 1    | 0         | 0      | 0    |
| 156711     | LAPTRVVAEMEAEAL     | NS3          | 1695  | 1709 | HLA-B7      | 100%        | Dengue virus 4 | 51 chromium cytotoxicity | Positive     | 1                   | 1                                                                    | 1    | 1    | 0         | 0      | 0    |
| 180473     | GEFRLRGEOR          | NS3          | 1995  | 2004 | HLA-B*40:01 | 100%        | Dengue virus 4 | ELISPOT                  | IFNg release | Positive            | 1                                                                    | 1    | 1    | 0         | 0      | 0    |
| 180648     | MEGVFHTMW           | NS3          | 1516  | 1524 | HLA-B*44:03 | 100%        | Dengue virus 4 | ELISPOT                  | IFNg release | Positive            | 1                                                                    | 1    | 1    | 0         | 0      | 0    |
| 180778     | TPEGIPIITLF         | NS3          | 1974  | 1983 | HLA-B*07:02 | 100%        | Dengue virus 4 | ELISPOT                  | IFNg release | Positive            | 1                                                                    | 1    | 1    | 0         | 0      | 0    |
| 180843     | YPKTKLTDDWD         | NS3          | 1868  | 1877 | HLA-B*35:01 | 100%        | Dengue virus 4 | ELISPOT                  | IFNg release | Positive            | 1                                                                    | 1    | 1    | 0         | 0      | 0    |
| 182919     | EFRLRGEOR           | NS3          | 1996  | 2004 | HLA-A*33:01 | 100%        | Dengue virus 4 | ELISPOT                  | IFNg release | Positive            | 1                                                                    | 1    | 1    | 0         | 0      | 0    |
| 183407     | GLFGKTOGVG          | NS3          | 1503  | 1512 | HLA-A*02:01 | 100%        | Dengue virus 4 | ELISPOT                  | IFNg release | Positive            | 1                                                                    | 1    | 1    | 0         | 0      | 0    |
| 183427     | GLYNGVVTK           | NS3          | 1622  | 1631 | HLA-A*03:01 | 100%        | Dengue virus 4 | ELISPOT                  | IFNg release | Positive            | 1                                                                    | 1    | 1    | 0         | 0      | 0    |
| 184079     | KLTWDVFWV           | NS3          | 398   | 406  | HLA-A*02:01 | 100%        | Dengue virus 4 | ELISPOT                  | IFNg release | Positive            | 1                                                                    | 1    | 1    | 0         | 0      | 0    |
| 186347     | VPNNYLIVM           | NS3          | 1749  | 1757 | HLA-B*35:01 | 100%        | Dengue virus 4 | ELISPOT                  | IFNg release | Positive            | 1                                                                    | 1    | 1    | 0         | 0      | 0    |
| 195838     | PNYNLIVDEAHFTD      | NS3          | 1750  | 1764 | HLA class I | 100%        | Dengue virus 4 | ICS                      | IFNg release | Positive            | 1                                                                    | 1    | 1    | 0         | 0      | 0    |
| 22822      | GTSGSPIINRK         | NS3          | 133   | 143  | HLA-A11     | 100%        | Dengue virus 4 | 51 chromium cytotoxicity | Positive     | 1                   | 1                                                                    | 1    | 0    | 0         | 0      | 0    |
| 14918      | LAPTRVVAEME         | NS3          | 221   | 232  | HLA-B7      | 100%        | Dengue virus 4 | 51 chromium cytotoxicity | Positive     | 1                   | 1                                                                    | 1    | 0    | 0         | 0      | 0    |
| 539058     | AHFTDPSSVAAEYIST    | NS3          | 1760  | 1776 | HLA class I | 100%        | Dengue virus 4 | ICS                      | IFNg release | Positive            | 1                                                                    | 1    | 1    | 0         | 0      | 0    |
| 539576     | LIVNDEAHFTDPSSVAA   | NS3          | 1754  | 1770 | HLA class I | 100%        | Dengue virus 4 | ICS                      | IFNg release | Positive            | 1                                                                    | 1    | 1    | 0         | 0      | 0    |
| 540029     | VEMGEAAAFMTATPPG    | NS3          | 1778  | 1794 | HLA class I | 100%        | Dengue virus 4 | ICS                      | IFNg release | Positive            | 1                                                                    | 1    | 1    | 0         | 0      | 0    |
| 581940     | APTRVVAEMEALRGL     | NS3          | 1558  | 1574 | HLA class I | 100%        | Dengue virus 4 | ICS                      | IFNg release | Positive-Low        | 1                                                                    | 1    | 1    | 0         | 0      | 0    |
| 65552      | TPEGIIPITL          | NS3          | 500   | 508  | HLA-B*35:01 | 100%        | Dengue virus 4 | 51 chromium cytotoxicity | Positive     | 1                   | 1                                                                    | 1    | 0    | 0         | 0      | 0    |
| 182926     | EIASLPTYL           | NS4a         | 2101  | 2109 | HLA-A*68:02 | 100%        | Dengue virus 4 | ELISPOT                  | IFNg release | Positive            | 1                                                                    | 1    | 1    | 0         | 0      | 0    |
| 184531     | ELISLETML           | NS4a         | 2140  | 2149 | HLA-B*35:01 | 100%        | Dengue virus 4 | ELISPOT                  | IFNg release | Positive            | 1                                                                    | 1    | 1    | 0         | 0      | 0    |
| 185881     | TEIASLPTYL          | NS4a         | 2100  | 2109 | HLA-B*40:01 | 100%        | Dengue virus 4 | ELISPOT                  | IFNg release | Positive            | 1                                                                    | 1    | 1    | 0         | 0      | 0    |
| 186620     | YVILITLTI           | NS4a         | 2228  | 2236 | HLA-A*24:02 | 100%        | Dengue virus 4 | ELISPOT                  | IFNg release | Positive            | 1                                                                    | 1    | 1    | 0         | 0      | 0    |
| 150647     | TPMLRHTIEN          | NS4b         | 2288  | 2297 | HLA-B*07:02 | 100%        | Dengue virus 4 | ELISPOT                  | IFNg release | Positive            | 1                                                                    | 1    | 1    | 0         | 0      | 0    |
| 180379     | ATGPILTLW           | NS4b         | 2436  | 2444 | HLA-B*58:01 | 100%        | Dengue virus 4 | ELISPOT                  | IFNg release | Positive            | 1                                                                    | 1    | 1    | 0         | 0      | 0    |
| 180764     | TETITLDVDL          | NS4b         | 2262  | 2271 | HLA-B*40:01 | 100%        | Dengue virus 4 | ELISPOT                  | IFNg release | Positive            | 1                                                                    | 1    | 1    | 0         | 0      | 0    |
| 180803     | VPLLAMGCY           | NS4b         | 2330  | 2338 | HLA-B*35:01 | 100%        | Dengue virus 4 | ELISPOT                  | IFNg release | Positive            | 1                                                                    | 1    | 1    | 0         | 0      | 0    |
| 183672     | IENTANSLSL          | NS4b         | 2295  | 2304 | HLA-B*40:01 | 100%        | Dengue virus 4 | ELISPOT                  | IFNg release | Positive            | 1                                                                    | 1    | 1    | 0         | 0      | 0    |
| 184453     | LLLMRTTWAF          | NS4b         | 2420  | 2429 | HLA-A*24:02 | 100%        | Dengue virus 4 | ELISPOT                  | IFNg release | Positive            | 1                                                                    | 1    | 1    | 0         | 0      | 0    |
| 184713     | LVAVATITL           | NS4b         | 2279  | 2287 | HLA-A*24:02 | 100%        | Dengue virus 4 | ELISPOT                  | IFNg release | Positive            | 1                                                                    | 1    | 1    | 0         | 0      | 0    |
| 186330     | VMLLLVHYAI          | NS4b         | 2351  | 2359 | HLA-A*24:02 | 100%        | Dengue virus 4 | ELISPOT                  | IFNg release | Positive            | 1                                                                    | 0    | 1    | 0         | 0      | 0    |
| 37535      | LLLMRTTWA           | NS4b         | 76    | 84   | HLA-A2      | 100%        | Dengue virus 4 | ICS                      | TNF release  | Positive            | 1                                                                    | 1    | 1    | 0         | 0      | 0    |
| 40472      | VMLLLVHYA           | NS4b         | 6     | 14   | HLA-A2      | 100%        | Dengue virus 4 | ICS                      | IFNg release | Positive            | 1                                                                    | 0    | 1    | 0         | 0      | 0    |
| 1067215    | HSWEDIPYL           | NS5          | 3319  | 3327 | HLA-A*02:01 | 100%        | Dengue virus 4 | ELISPOT                  | IFNg release | Positive            | 1                                                                    | 1    | 1    | 0         | 0      | 0    |
| 180684     | NPRLCITREEF         | NS5          | 2877  | 2886 | HLA-B*07:02 | 100%        | Dengue virus 4 | ELISPOT                  | IFNg release | Positive            | 1                                                                    | 1    | 1    | 0         | 0      | 0    |
| 180718     | REDLWCGSL           | NS5          | 3330  | 3338 | HLA-B*40:01 | 100%        | Dengue virus 4 | ELISPOT                  | IFNg release | Positive            | 1                                                                    | 1    | 1    | 0         | 0      | 0    |
| 183353     | GESSSNPTI           | NS5          | 2635  | 2643 | HLA-B*44:02 | 100%        | Dengue virus 4 | ELISPOT                  | IFNg release | Positive            | 1                                                                    | 1    | 1    | 0         | 0      | 0    |
| 183570     | HEMYWVSGV           | NS5          | 2703  | 2711 | HLA-B*44:02 | 100%        | Dengue virus 4 | ELISPOT                  | IFNg release | Positive            | 0                                                                    | 0    | 0    | 0         | 0      | 0    |
| 184051     | KLGEFGRK            | NS5          | 2948  | 2956 | HLA-A*03:01 | 100%        | Dengue virus 4 | ELISPOT                  | IFNg release | Positive            | 1                                                                    | 1    | 1    | 0         | 0      | 0    |
| 184130     | KREDLWCGSL          | NS5          | 3329  | 3338 | HLA-B*08:01 | 100%        | Dengue virus 4 | ELISPOT                  | IFNg release | Positive            | 1                                                                    | 1    | 1    | 0         | 0      | 0    |
| 184954     | MITTEDMLKVV         | NS5          | 3292  | 3301 | HLA class I | 100%        | Dengue virus 4 | ICS                      | IFNg release | Positive            | 1                                                                    | 1    | 1    | 0         | 0      | 0    |
| 186453     | WEPKSGWKNNW         | NS5          | 3182  | 3191 | HLA-B*44:02 | 100%        | Dengue virus 4 | ELISPOT                  | IFNg release | Positive            | 1                                                                    | 1    | 1    | 0         | 0      | 0    |
| 186550     | YDQENPYRTW          | NS5          | 2781  | 2790 | HLA-B*44:02 | 100%        | Dengue virus 4 | ELISPOT                  | IFNg release | Positive            | 1                                                                    | 1    | 1    | 0         | 0      | 0    |
| 186640     | YYMATLKNV           | NS5          | 2576  | 2584 | HLA-A*24:02 | 100%        | Dengue virus 4 | ELISPOT                  | IFNg release | Positive            | 1                                                                    | 1    | 1    | 0         | 0      | 0    |
| 186641     | YYMATLKNVT          | NS5          | 2576  | 2585 | HLA-A*24:02 | 100%        | Dengue virus 4 | ELISPOT                  | IFNg release | Positive            | 1                                                                    | 1    | 1    | 0         | 0      | 0    |
| 539656     | MAISGDDCVKPLDERF    | NS5          | 3146  | 3162 | HLA class I | 100%        | Dengue virus 4 | ICS                      | IFNg release | Positive            | 1                                                                    | 1    | 1    | 0         | 0      | 0    |
| 539703     | MVTQLAMTDTTPFGQOR   | NS5          | 2824  | 2840 | HLA class I | 100%        | Dengue virus 4 | ICS                      | IFNg release | Positive            | 1                                                                    | 1    | 1    | 0         | 0      | 0    |
| 180475     | GEORKTVEL           | NS3          | 2001  | 2010 | HLA-B*40:01 | 81% - <100% | Dengue virus 4 | ELISPOT                  | IFNg release | Positive            | 1                                                                    | 1    | 1    | 0         | 0      | 0    |
| 183231     | FPOSNSPIED          | NS3          | 1799  | 1808 | HLA-B*35:01 | 81% - <100% | Dengue virus 4 | ELISPOT                  | IFNg release | Positive            | 1                                                                    | 1    | 1    | 0         | 0      | 0    |
| 183338     | GEIGAVITDF          | NS3          | 1595  | 1604 | HLA-B*44:03 | 81% - <100% | Dengue virus 4 | ELISPOT                  | IFNg release | Positive            | 1                                                                    | 1    | 1    | 0         | 0      | 0    |
| 62616      | SVKDREWCF           | NS3          | 389   | 397  | HLA-A24     | 81% - <100% | Dengue virus 4 | ELISPOT                  | IFNg release | Positive            | 1                                                                    | 1    | 1    | 0         | 0      | 0    |
| 180596     | LETLMVLALL          | NS4a         | 2144  | 2153 | HLA-B*40:01 | 81% - <100% | Dengue virus 4 | ELISPOT                  | IFNg release | Positive            | 1                                                                    | 1    | 1    | 0         | 0      | 0    |
| 182508     | AIAVASGLLLW         | NS4a         | 2179  | 2188 | HLA-B*44:02 | 81% - <100% | Dengue virus 4 | ELISPOT                  | IFNg release | Positive            | 0                                                                    | 0    | 0    | 0         | 0      | 0    |
| 183650     | IJAVASGLLLW         | NS4a         | 2180  | 2188 | HLA-B*57:01 | 81% - <100% | Dengue virus 4 | ELISPOT                  | IFNg release | Positive            | 1                                                                    | 1    | 1    | 0         | 0      | 0    |
| 42083      | MLVALLGAM           | NS4a         | 56    | 64   | HLA-A2      | 81% - <100% | Dengue virus 4 | ICS                      | IFNg release | Positive            | 1                                                                    | 1    | 1    | 0         | 0      | 0    |
| 136826     | CYSQNPITTL          | NS4b         | 2337  | 2346 | HLA-A*24:02 | 81% - <100% | Dengue virus 4 | ELISPOT                  | IFNg release | Positive            | 1                                                                    | 1    | 1    | 0         | 0      | 0    |
| 150548     | RSNAIGAVF           | NS5          | 2891  | 2900 | HLA-B*15:01 | 81% - <100% | Dengue virus 4 | ELISPOT                  | IFNg release | Positive            | 1                                                                    | 1    | 1    | 0         | 0      | 0    |
| 185232     | QEHKETWHY           | NS5          | 2772  | 2781 | HLA-B*44:02 | 81% - <100% | Dengue virus 4 | ELISPOT                  | IFNg release | Positive            | 1                                                                    | 1    | 1    | 0         | 0      | 0    |
| 539149     | DCVWKPLDERFSTSLF    | NS5          | 3152  | 3168 | HLA class I | 81% - <100% | Dengue virus 4 | ICS                      | IFNg release | Positive            |                                                                      |      |      |           |        |      |



**Supplementary Table S5.** Number of the complete polyprotein sequences of the dengue viral isolates from Thailand, Brazil and Mexico for each of the four dengue serotypes.

| Country  | DENV-1<br>sequences | DENV-2<br>sequences | DENV-3<br>sequences | DENV-4<br>sequences | Total<br>Sequences |
|----------|---------------------|---------------------|---------------------|---------------------|--------------------|
| Thailand | 140                 | 13                  | 67                  | 83                  | 303                |
| Brazil   | 25                  | 35                  | 45                  | 36                  | 141                |
| Mexico   | 81                  | 20                  | 2                   | 0                   | 103                |



**Supplementary Table S6. Alignment of CD4 and CD8 epitopes in circulating dengue viruses from Thailand and six vaccine candidates.** Detailed information, for Thailand, on each of the vaccine carried CD4 and CD8 T cell epitopes that are not present in any of the viral isolates, present in all of the viral isolates, present in only 81% – <100% or 51% – 80% or in only >0% – 50% of viral isolates for each of the epitope within each of the six vaccine candidates and the four dengue serotypes. The first table summarizes information retrieved on circulating viral isolate sequences available from Thailand. Next, the globally reported CD4/CD8 T cell epitopes are organized into: DENV-1 specific CD4 epitopes, DENV-2 specific CD4 epitopes, DENV-3 specific CD4 epitopes, DENV-4 specific CD4 epitopes, DENV-1 specific CD8 epitopes, DENV-2 specific CD8 epitopes, DENV-3 specific CD8 epitopes, DENV-4 specific CD8 epitopes. In each of these tables, identity of the epitope to each of the corresponding viral isolate serotype and each of the vaccine constructs are indicated. Green color shade and number 1 indicates 100% identity in the given virus isolate/vaccine construct. Pink color shade and number zero indicates not identical in the given virus isolate/vaccine construct.



| NCBI ID    | Strain Name               | Host  | Date       | Continent | Country  | Prot_Name   | VirusType      |
|------------|---------------------------|-------|------------|-----------|----------|-------------|----------------|
| QFS19153.1 | KDC0587A_06/15/2011       | Human | 2011-06-14 | Asia      | Thailand | polyprotein | Dengue virus 1 |
| QFS19173.1 | KDC1209A_11/05/2012       | Human | 2012-11-06 | Asia      | Thailand | polyprotein | Dengue virus 1 |
| QFS19144.1 | KDC0456A_02/07/2011       | Human | 2011-02-08 | Asia      | Thailand | polyprotein | Dengue virus 1 |
| QFS19145.1 | KDC0492A_04/21/2011       | Human | 2011-04-21 | Asia      | Thailand | polyprotein | Dengue virus 1 |
| QFS19146.1 | KDC0493A_04/21/2011       | Human | 2011-04-21 | Asia      | Thailand | polyprotein | Dengue virus 1 |
| QFS19166.1 | KDC0885A_11/29/2011       | Human | 2011-11-29 | Asia      | Thailand | polyprotein | Dengue virus 1 |
| QFS19168.1 | KDC1149A_10/10/2012       | Human | 2012-10-10 | Asia      | Thailand | polyprotein | Dengue virus 1 |
| QFS19190.1 | KDH0129A_06/02/2011       | Human | 2011-06-01 | Asia      | Thailand | polyprotein | Dengue virus 1 |
| QFS19205.1 | KDH0156A_07/21/2011       | Human | 2011-07-20 | Asia      | Thailand | polyprotein | Dengue virus 1 |
| QFS19215.1 | KDH0176A_08/23/2011       | Human | 2011-08-22 | Asia      | Thailand | polyprotein | Dengue virus 1 |
| QFS19222.1 | KDH0201A_11/28/2011       | Human | 2011-11-28 | Asia      | Thailand | polyprotein | Dengue virus 1 |
| QFS19223.1 | KDH0202A_11/29/2011       | Human | 2011-11-28 | Asia      | Thailand | polyprotein | Dengue virus 1 |
| QFS19232.1 | KDH0288A_09/11/2012       | Human | 2012-09-10 | Asia      | Thailand | polyprotein | Dengue virus 1 |
| QFS19235.1 | KDH0304A_10/02/2012       | Human | 2012-10-01 | Asia      | Thailand | polyprotein | Dengue virus 1 |
| QTX92594.1 | 00750/11                  | Human | 2011-01-01 | Asia      | Thailand | polyprotein | Dengue virus 1 |
| QTX92758.1 | 00485/14                  | Human | 2014-01-01 | Asia      | Thailand | polyprotein | Dengue virus 1 |
| QTX92757.1 | 01937/06                  | Human | 2006-01-01 | Asia      | Thailand | polyprotein | Dengue virus 1 |
| QTX92448.1 | 00690/06                  | Human | 2006-01-01 | Asia      | Thailand | polyprotein | Dengue virus 1 |
| QTX92560.1 | 02673/06                  | Human | 2006-01-01 | Asia      | Thailand | polyprotein | Dengue virus 1 |
| QTX92606.1 | 00192/13                  | Human | 2013-01-01 | Asia      | Thailand | polyprotein | Dengue virus 1 |
| QTX92609.1 | 01616/05                  | Human | 2005-01-01 | Asia      | Thailand | polyprotein | Dengue virus 1 |
| QTX92611.1 | 00444/14                  | Human | 2014-01-01 | Asia      | Thailand | polyprotein | Dengue virus 1 |
| QTX92660.1 | 01578/05                  | Human | 2005-01-01 | Asia      | Thailand | polyprotein | Dengue virus 1 |
| QTX92680.1 | 01274/04                  | Human | 2004-01-01 | Asia      | Thailand | polyprotein | Dengue virus 1 |
| QTX92723.1 | 01133/12                  | Human | 2012-01-01 | Asia      | Thailand | polyprotein | Dengue virus 1 |
| QTX92771.1 | 02553/06                  | Human | 2006-01-01 | Asia      | Thailand | polyprotein | Dengue virus 1 |
| QTX92802.1 | 00817/06                  | Human | 2006-01-01 | Asia      | Thailand | polyprotein | Dengue virus 1 |
| QTX92829.1 | 01499/06                  | Human | 2006-01-01 | Asia      | Thailand | polyprotein | Dengue virus 1 |
| QTX92844.1 | 01535/06                  | Human | 2006-01-01 | Asia      | Thailand | polyprotein | Dengue virus 1 |
| QTX92575.1 | 00559/14                  | Human | 2014-01-01 | Asia      | Thailand | polyprotein | Dengue virus 1 |
| ANC57582.1 | DENV1-384                 | Human | 2009-01-01 | Asia      | Thailand | polyprotein | Dengue virus 1 |
| AHI88623.1 | DENV-1/8/Thailand/01/2013 | Human | 2013-01-01 | Asia      | Thailand | polyprotein | Dengue virus 1 |
| QTX92652.1 | 00878/04                  | Human | 2004-01-01 | Asia      | Thailand | polyprotein | Dengue virus 1 |



|            |                     |       |            |      |          |             |                |
|------------|---------------------|-------|------------|------|----------|-------------|----------------|
| QTX92811.1 | 00479/04            | Human | 2004-01-01 | Asia | Thailand | polyprotein | Dengue virus 1 |
| QTX92858.1 | 02129/06            | Human | 2006-01-01 | Asia | Thailand | polyprotein | Dengue virus 1 |
| QTX92431.1 | 01302/10            | Human | 2010-01-01 | Asia | Thailand | polyprotein | Dengue virus 1 |
| QTX92434.1 | 00647/05            | Human | 2005-01-01 | Asia | Thailand | polyprotein | Dengue virus 1 |
| QTX92513.1 | 00840/12            | Human | 2012-01-01 | Asia | Thailand | polyprotein | Dengue virus 1 |
| QTX92537.1 | 02723/06            | Human | 2006-01-01 | Asia | Thailand | polyprotein | Dengue virus 1 |
| QTX92551.1 | 02499/06            | Human | 2006-01-01 | Asia | Thailand | polyprotein | Dengue virus 1 |
| QFS19164.1 | KDC0760A_08/10/2011 | Human | 2011-08-11 | Asia | Thailand | polyprotein | Dengue virus 1 |
| QFS19187.1 | KDH0102A_02/15/2011 | Human | 2011-02-11 | Asia | Thailand | polyprotein | Dengue virus 1 |
| QFS19199.1 | KDH0144A_06/30/2011 | Human | 2011-06-29 | Asia | Thailand | polyprotein | Dengue virus 1 |
| QFS19203.1 | KDH0152A_07/13/2011 | Human | 2011-07-12 | Asia | Thailand | polyprotein | Dengue virus 1 |
| QFS19233.1 | KDH0289A_09/12/2012 | Human | 2012-09-11 | Asia | Thailand | polyprotein | Dengue virus 1 |
| QFS19237.1 | KDH0309A_10/09/2012 | Human | 2012-10-09 | Asia | Thailand | polyprotein | Dengue virus 1 |
| QFS19239.1 | KDH0323A_11/26/2012 | Human | 2012-11-26 | Asia | Thailand | polyprotein | Dengue virus 1 |
| QTX92593.1 | 01381/10            | Human | 2010-01-01 | Asia | Thailand | polyprotein | Dengue virus 1 |
| QTX92599.1 | 02776/06            | Human | 2006-01-01 | Asia | Thailand | polyprotein | Dengue virus 1 |
| QTX92604.1 | 00479/05            | Human | 2005-01-01 | Asia | Thailand | polyprotein | Dengue virus 1 |
| QTX92657.1 | 00258/05            | Human | 2005-01-01 | Asia | Thailand | polyprotein | Dengue virus 1 |
| QTX92662.1 | 02848/06            | Human | 2006-01-01 | Asia | Thailand | polyprotein | Dengue virus 1 |
| QTX92768.1 | 02717/06            | Human | 2006-01-01 | Asia | Thailand | polyprotein | Dengue virus 1 |
| QTX92879.1 | 01710/06            | Human | 2006-01-01 | Asia | Thailand | polyprotein | Dengue virus 1 |
| QTX92881.1 | 00758/14            | Human | 2014-01-01 | Asia | Thailand | polyprotein | Dengue virus 1 |
| QTX92571.1 | 00572/14            | Human | 2014-01-01 | Asia | Thailand | polyprotein | Dengue virus 1 |
| QFS19177.1 | KDH0032A_07/07/2010 | Human | 2010-07-07 | Asia | Thailand | polyprotein | Dengue virus 1 |
| QTX92679.1 | 01453/11            | Human | 2011-01-01 | Asia | Thailand | polyprotein | Dengue virus 1 |
| QTX92686.1 | 00068/06            | Human | 2006-01-01 | Asia | Thailand | polyprotein | Dengue virus 1 |
| QTX92693.1 | 00432/11            | Human | 2011-01-01 | Asia | Thailand | polyprotein | Dengue virus 1 |
| QTX92726.1 | 00186/05            | Human | 2005-01-01 | Asia | Thailand | polyprotein | Dengue virus 1 |
| QTX92784.1 | 02789/06            | Human | 2006-01-01 | Asia | Thailand | polyprotein | Dengue virus 1 |
| QTX92808.1 | 01006/12            | Human | 2012-01-01 | Asia | Thailand | polyprotein | Dengue virus 1 |
| QTX92812.1 | 02585/06            | Human | 2006-01-01 | Asia | Thailand | polyprotein | Dengue virus 1 |
| QTX92815.1 | 02547/06            | Human | 2006-01-01 | Asia | Thailand | polyprotein | Dengue virus 1 |
| QTX92845.1 | 00208/05            | Human | 2005-01-01 | Asia | Thailand | polyprotein | Dengue virus 1 |
| QTX92847.1 | 01518/10            | Human | 2010-01-01 | Asia | Thailand | polyprotein | Dengue virus 1 |



|            |                     |         |            |      |          |             |                |
|------------|---------------------|---------|------------|------|----------|-------------|----------------|
| QTX92851.1 | 01510/10            | Human   | 2010-01-01 | Asia | Thailand | polyprotein | Dengue virus 1 |
| QTX92867.1 | 00738/14            | Human   | 2014-01-01 | Asia | Thailand | polyprotein | Dengue virus 1 |
| QTX92429.1 | 01313/04            | Human   | 2004-01-01 | Asia | Thailand | polyprotein | Dengue virus 1 |
| QTX92443.1 | 00554/14            | Human   | 2014-01-01 | Asia | Thailand | polyprotein | Dengue virus 1 |
| QTX92444.1 | 01040/05            | Human   | 2005-01-01 | Asia | Thailand | polyprotein | Dengue virus 1 |
| QTX92486.1 | 01690/06            | Human   | 2006-01-01 | Asia | Thailand | polyprotein | Dengue virus 1 |
| QTX92515.1 | 00369/04            | Human   | 2004-01-01 | Asia | Thailand | polyprotein | Dengue virus 1 |
| QTX92516.1 | 01479/07            | Human   | 2007-01-01 | Asia | Thailand | polyprotein | Dengue virus 1 |
| QTX92531.1 | 01377/06            | Human   | 2006-01-01 | Asia | Thailand | polyprotein | Dengue virus 1 |
| QTX92541.1 | 02835/06            | Human   | 2006-01-01 | Asia | Thailand | polyprotein | Dengue virus 1 |
| QTX92547.1 | 02725/06            | Human   | 2006-01-01 | Asia | Thailand | polyprotein | Dengue virus 1 |
| QTX92557.1 | 01604/04            | Human   | 2004-01-01 | Asia | Thailand | polyprotein | Dengue virus 1 |
| CDF77359.1 | KDH0030A            | Unknown | 2010-01-01 | Asia | Thailand | polyprotein | Dengue virus 1 |
| AXS75991.1 | Thai2013            | Human   | 2013-01-01 | Asia | Thailand | polyprotein | Dengue virus 1 |
| QFS19160.1 | KDC0650A_07/06/2011 | Human   | 2011-07-07 | Asia | Thailand | polyprotein | Dengue virus 1 |
| QFS19185.1 | KDH0087A_12/08/2010 | Human   | 2010-12-07 | Asia | Thailand | polyprotein | Dengue virus 1 |
| QFS19207.1 | KDH0161A_07/27/2011 | Human   | 2011-07-26 | Asia | Thailand | polyprotein | Dengue virus 1 |
| QFS19234.1 | KDH0295A_09/19/2012 | Human   | 2012-09-18 | Asia | Thailand | polyprotein | Dengue virus 1 |
| QTX92586.1 | 02340/06            | Human   | 2006-01-01 | Asia | Thailand | polyprotein | Dengue virus 1 |
| QTX92753.1 | 00493/11            | Human   | 2011-01-01 | Asia | Thailand | polyprotein | Dengue virus 1 |
| QTX92761.1 | 02679/06            | Human   | 2006-01-01 | Asia | Thailand | polyprotein | Dengue virus 1 |
| QTX92765.1 | 00841/06            | Human   | 2006-01-01 | Asia | Thailand | polyprotein | Dengue virus 1 |
| QTX92445.1 | 01175/10            | Human   | 2010-01-01 | Asia | Thailand | polyprotein | Dengue virus 1 |
| QTX92446.1 | 00943/12            | Human   | 2012-01-01 | Asia | Thailand | polyprotein | Dengue virus 1 |
| QTX92452.1 | 02548/06            | Human   | 2006-01-01 | Asia | Thailand | polyprotein | Dengue virus 1 |
| QTX92457.1 | 02296/06            | Human   | 2006-01-01 | Asia | Thailand | polyprotein | Dengue virus 1 |
| QTX92627.1 | 00090/13            | Human   | 2013-01-01 | Asia | Thailand | polyprotein | Dengue virus 1 |
| QTX92646.1 | 00002/06            | Human   | 2006-01-01 | Asia | Thailand | polyprotein | Dengue virus 1 |
| QTX92655.1 | 00358/12            | Human   | 2012-01-01 | Asia | Thailand | polyprotein | Dengue virus 1 |
| QTX92688.1 | 00458/06            | Human   | 2006-01-01 | Asia | Thailand | polyprotein | Dengue virus 1 |
| QTX92689.1 | 01277/06            | Human   | 2006-01-01 | Asia | Thailand | polyprotein | Dengue virus 1 |
| QTX92701.1 | 00975/04            | Human   | 2004-01-01 | Asia | Thailand | polyprotein | Dengue virus 1 |
| QTX92725.1 | 01600/10            | Human   | 2010-01-01 | Asia | Thailand | polyprotein | Dengue virus 1 |
| QTX92781.1 | 01651/05            | Human   | 2005-01-01 | Asia | Thailand | polyprotein | Dengue virus 1 |



|            |                      |       |            |      |          |             |                |
|------------|----------------------|-------|------------|------|----------|-------------|----------------|
| QTX92800.1 | 01591/05             | Human | 2005-01-01 | Asia | Thailand | polyprotein | Dengue virus 1 |
| QTX92801.1 | 00272/11             | Human | 2011-01-01 | Asia | Thailand | polyprotein | Dengue virus 1 |
| QTX92846.1 | 00330/11             | Human | 2011-01-01 | Asia | Thailand | polyprotein | Dengue virus 1 |
| QTX92418.1 | 02592/06             | Human | 2006-01-01 | Asia | Thailand | polyprotein | Dengue virus 1 |
| QTX92538.1 | 00777/12             | Human | 2012-01-01 | Asia | Thailand | polyprotein | Dengue virus 1 |
| ADU03651.1 | 01096/07             | Human | 2007-07-27 | Asia | Thailand | polyprotein | Dengue virus 1 |
| ANC57592.1 | DENV1-18805          | Human | 2012-01-01 | Asia | Thailand | polyprotein | Dengue virus 1 |
| QFS19172.1 | KDC1153A_10/10/2012  | Human | 2012-10-10 | Asia | Thailand | polyprotein | Dengue virus 1 |
| QFS19175.1 | KDH0026A_06/15/2010  | Human | 2010-06-15 | Asia | Thailand | polyprotein | Dengue virus 1 |
| QTX92861.1 | 00785/11             | Human | 2011-01-01 | Asia | Thailand | polyprotein | Dengue virus 1 |
| QTX92545.1 | 01411/04             | Human | 2004-01-01 | Asia | Thailand | polyprotein | Dengue virus 1 |
| QTX92553.1 | 00211/05             | Human | 2005-01-01 | Asia | Thailand | polyprotein | Dengue virus 1 |
| QTX92559.1 | 00371/06             | Human | 2006-01-01 | Asia | Thailand | polyprotein | Dengue virus 1 |
| BDB33210.1 | Th15-DV1-TM002       | Human | 2015-01-11 | Asia | Thailand | polyprotein | Dengue virus 1 |
| QFS19159.1 | KDC0640A2_06/30/2011 | Human | 2011-07-01 | Asia | Thailand | polyprotein | Dengue virus 1 |
| QFS19189.1 | KDH0112A_04/21/2011  | Human | 2011-04-20 | Asia | Thailand | polyprotein | Dengue virus 1 |
| QFS19217.1 | KDH0182A_09/07/2011  | Human | 2011-09-05 | Asia | Thailand | polyprotein | Dengue virus 1 |
| QFS19226.1 | KDH0228A_06/07/2012  | Human | 2012-06-06 | Asia | Thailand | polyprotein | Dengue virus 1 |
| QPQ49765.1 | P3.1 Thailand 2005   | Human | 2005-01-11 | Asia | Thailand | polyprotein | Dengue virus 1 |
| QTX92595.1 | 01530/06             | Human | 2006-01-01 | Asia | Thailand | polyprotein | Dengue virus 1 |
| QTX92612.1 | 00259/04             | Human | 2004-01-01 | Asia | Thailand | polyprotein | Dengue virus 1 |
| QTX92670.1 | 00349/11             | Human | 2011-01-01 | Asia | Thailand | polyprotein | Dengue virus 1 |
| QTX92745.1 | 00674/06             | Human | 2006-01-01 | Asia | Thailand | polyprotein | Dengue virus 1 |
| QTX92454.1 | 02344/06             | Human | 2006-01-01 | Asia | Thailand | polyprotein | Dengue virus 1 |
| QTX92462.1 | 00878/12             | Human | 2012-01-01 | Asia | Thailand | polyprotein | Dengue virus 1 |
| QTX92576.1 | 00438/06             | Human | 2006-01-01 | Asia | Thailand | polyprotein | Dengue virus 1 |
| QTX92577.1 | 02584/06             | Human | 2006-01-01 | Asia | Thailand | polyprotein | Dengue virus 1 |
| QFS19151.1 | KDC0575A_06/02/2011  | Human | 2011-06-03 | Asia | Thailand | polyprotein | Dengue virus 1 |
| QTX92707.1 | 00059/13             | Human | 2013-01-01 | Asia | Thailand | polyprotein | Dengue virus 1 |
| QTX92713.1 | 02634/06             | Human | 2006-01-01 | Asia | Thailand | polyprotein | Dengue virus 1 |
| QTX92716.1 | 00543/12             | Human | 2012-01-01 | Asia | Thailand | polyprotein | Dengue virus 1 |
| QTX92718.1 | 00743/05             | Human | 2005-01-01 | Asia | Thailand | polyprotein | Dengue virus 1 |
| QTX92724.1 | 00369/06             | Human | 2006-01-01 | Asia | Thailand | polyprotein | Dengue virus 1 |
| QTX92857.1 | 01302/11             | Human | 2011-01-01 | Asia | Thailand | polyprotein | Dengue virus 1 |



|            |                      |         |            |      |          |             |                |
|------------|----------------------|---------|------------|------|----------|-------------|----------------|
| QTX92428.1 | 00343/13             | Human   | 2013-01-01 | Asia | Thailand | polyprotein | Dengue virus 1 |
| QTX92489.1 | 01152/13             | Human   | 2013-01-01 | Asia | Thailand | polyprotein | Dengue virus 1 |
| ANC57585.1 | DENV1-2878           | Human   | 2008-01-01 | Asia | Thailand | polyprotein | Dengue virus 1 |
| ANC57583.1 | DENV1-1990           | Human   | 2008-01-01 | Asia | Thailand | polyprotein | Dengue virus 1 |
| QFS19155.1 | KDC0599A_06/21/2011  | Human   | 2011-06-21 | Asia | Thailand | polyprotein | Dengue virus 1 |
| ANC57599.1 | DENV2-3229           | Human   | 2011-01-01 | Asia | Thailand | polyprotein | Dengue virus 2 |
| QXY23100.1 | DV2C-TM19-26         | Human   | 2019-11-24 | Asia | Thailand | polyprotein | Dengue virus 2 |
| QXY23099.1 | DV2A-TM19-13         | Human   | 2019-11-19 | Asia | Thailand | polyprotein | Dengue virus 2 |
| BBG31508.1 | Th16-026DV2          | Human   | 2016-01-10 | Asia | Thailand | polyprotein | Dengue virus 2 |
| QBK46950.1 | 16681-2007           | Unknown | 2007-01-06 | Asia | Thailand | polyprotein | Dengue virus 2 |
| ANC57598.1 | DENV2-1365           | Human   | 2009-01-01 | Asia | Thailand | polyprotein | Dengue virus 2 |
| BBG31503.1 | Th16-035DV2          | Human   | 2016-01-11 | Asia | Thailand | polyprotein | Dengue virus 2 |
| BBG31505.1 | Th17-061DV2          | Human   | 2017-01-01 | Asia | Thailand | polyprotein | Dengue virus 2 |
| QFS19150.1 | KDC0574A2_06/02/2011 | Human   | 2011-06-04 | Asia | Thailand | polyprotein | Dengue virus 2 |
| QBA29681.1 | CNR_25326            | Human   | 2014-08-15 | Asia | Thailand | polyprotein | Dengue virus 2 |
| QXY23103.1 | DV2C-TM19-80         | Human   | 2019-12-30 | Asia | Thailand | polyprotein | Dengue virus 2 |
| BBG31506.1 | Th17-074DV2          | Human   | 2017-01-02 | Asia | Thailand | polyprotein | Dengue virus 2 |
| BBG31507.1 | Th16-011DV2          | Human   | 2016-01-10 | Asia | Thailand | polyprotein | Dengue virus 2 |
| BBG31513.1 | Th17-059DV3          | Human   | 2017-01-01 | Asia | Thailand | polyprotein | Dengue virus 3 |
| QTX93239.1 | 01434/10             | Human   | 2010-01-01 | Asia | Thailand | polyprotein | Dengue virus 3 |
| QTX93295.1 | 02185/06             | Human   | 2006-01-01 | Asia | Thailand | polyprotein | Dengue virus 3 |
| QTX93456.1 | 01530/05             | Human   | 2005-01-01 | Asia | Thailand | polyprotein | Dengue virus 3 |
| QTX93571.1 | 01284/06             | Human   | 2006-01-01 | Asia | Thailand | polyprotein | Dengue virus 3 |
| QTX93578.1 | 01536/06             | Human   | 2006-01-01 | Asia | Thailand | polyprotein | Dengue virus 3 |
| QTX93347.1 | 01131/12             | Human   | 2012-01-01 | Asia | Thailand | polyprotein | Dengue virus 3 |
| QTX93386.1 | 02763/06             | Human   | 2006-01-01 | Asia | Thailand | polyprotein | Dengue virus 3 |
| QTX93396.1 | 01400/05             | Human   | 2005-01-01 | Asia | Thailand | polyprotein | Dengue virus 3 |
| QTX93427.1 | 00608/12             | Human   | 2012-01-01 | Asia | Thailand | polyprotein | Dengue virus 3 |
| QTX93468.1 | 00999/12             | Human   | 2012-01-01 | Asia | Thailand | polyprotein | Dengue virus 3 |
| QTX93479.1 | 02490/06             | Human   | 2006-01-01 | Asia | Thailand | polyprotein | Dengue virus 3 |
| QTX93537.1 | 00288/06             | Human   | 2006-01-01 | Asia | Thailand | polyprotein | Dengue virus 3 |
| QTX93597.1 | 01569/05             | Human   | 2005-01-01 | Asia | Thailand | polyprotein | Dengue virus 3 |
| QBA29682.1 | CNR_15418            | Human   | 2012-07-23 | Asia | Thailand | polyprotein | Dengue virus 3 |
| QTX93435.1 | 01385/10             | Human   | 2010-01-01 | Asia | Thailand | polyprotein | Dengue virus 3 |



|            |             |       |            |      |          |             |                |
|------------|-------------|-------|------------|------|----------|-------------|----------------|
| QTX93561.1 | 00923/11    | Human | 2011-01-01 | Asia | Thailand | polyprotein | Dengue virus 3 |
| QTX93564.1 | 01253/06    | Human | 2006-01-01 | Asia | Thailand | polyprotein | Dengue virus 3 |
| BBG31510.1 | Th16-016DV3 | Human | 2016-01-10 | Asia | Thailand | polyprotein | Dengue virus 3 |
| QTX93258.1 | 01045/06    | Human | 2006-01-01 | Asia | Thailand | polyprotein | Dengue virus 3 |
| QTX93260.1 | 00695/13    | Human | 2013-01-01 | Asia | Thailand | polyprotein | Dengue virus 3 |
| QTX93237.1 | 00266/12    | Human | 2012-01-01 | Asia | Thailand | polyprotein | Dengue virus 3 |
| QTX93241.1 | 00710/06    | Human | 2006-01-01 | Asia | Thailand | polyprotein | Dengue virus 3 |
| QTX93288.1 | 01398/08    | Human | 2008-01-01 | Asia | Thailand | polyprotein | Dengue virus 3 |
| QTX93317.1 | 00432/14    | Human | 2014-01-01 | Asia | Thailand | polyprotein | Dengue virus 3 |
| QTX93321.1 | 00739/14    | Human | 2014-01-01 | Asia | Thailand | polyprotein | Dengue virus 3 |
| QTX93389.1 | 01278/11    | Human | 2011-01-01 | Asia | Thailand | polyprotein | Dengue virus 3 |
| QTX93391.1 | 01508/10    | Human | 2010-01-01 | Asia | Thailand | polyprotein | Dengue virus 3 |
| QTX93470.1 | 00654/14    | Human | 2014-01-01 | Asia | Thailand | polyprotein | Dengue virus 3 |
| QTX93527.1 | 00372/06    | Human | 2006-01-01 | Asia | Thailand | polyprotein | Dengue virus 3 |
| QTX93565.1 | 02784/06    | Human | 2006-01-01 | Asia | Thailand | polyprotein | Dengue virus 3 |
| QTX93594.1 | 02292/06    | Human | 2006-01-01 | Asia | Thailand | polyprotein | Dengue virus 3 |
| QTX93331.1 | 01401/13    | Human | 2013-01-01 | Asia | Thailand | polyprotein | Dengue virus 3 |
| QTX93412.1 | 00065/13    | Human | 2013-01-01 | Asia | Thailand | polyprotein | Dengue virus 3 |
| QTX93547.1 | 01651/06    | Human | 2006-01-01 | Asia | Thailand | polyprotein | Dengue virus 3 |
| ANC57606.1 | DENV3-1631  | Human | 2011-01-01 | Asia | Thailand | polyprotein | Dengue virus 3 |
| QTX93249.1 | 02380/06    | Human | 2006-01-01 | Asia | Thailand | polyprotein | Dengue virus 3 |
| QTX93252.1 | 00852/05    | Human | 2005-01-01 | Asia | Thailand | polyprotein | Dengue virus 3 |
| QTX93291.1 | 01445/11    | Human | 2011-01-01 | Asia | Thailand | polyprotein | Dengue virus 3 |
| QTX93442.1 | 02678/06    | Human | 2006-01-01 | Asia | Thailand | polyprotein | Dengue virus 3 |
| QTX93493.1 | 00557/06    | Human | 2006-01-01 | Asia | Thailand | polyprotein | Dengue virus 3 |
| QTX93499.1 | 00507/14    | Human | 2014-01-01 | Asia | Thailand | polyprotein | Dengue virus 3 |
| QTX93408.1 | 00872/05    | Human | 2005-01-01 | Asia | Thailand | polyprotein | Dengue virus 3 |
| QTX93410.1 | 00817/12    | Human | 2012-01-01 | Asia | Thailand | polyprotein | Dengue virus 3 |
| QTX93416.1 | 01029/10    | Human | 2010-01-01 | Asia | Thailand | polyprotein | Dengue virus 3 |
| QTX93429.1 | 00759/14    | Human | 2014-01-01 | Asia | Thailand | polyprotein | Dengue virus 3 |
| QTX93518.1 | 01035/11    | Human | 2011-01-01 | Asia | Thailand | polyprotein | Dengue virus 3 |
| QTX93539.1 | 02814/06    | Human | 2006-01-01 | Asia | Thailand | polyprotein | Dengue virus 3 |
| QTX93589.1 | 01251/06    | Human | 2006-01-01 | Asia | Thailand | polyprotein | Dengue virus 3 |
| QTX93602.1 | 01257/06    | Human | 2006-01-01 | Asia | Thailand | polyprotein | Dengue virus 3 |



|            |             |                    |            |      |          |             |                |
|------------|-------------|--------------------|------------|------|----------|-------------|----------------|
| AMA21734.1 | Pythium     | Parasitic Oomycote | 2014-08-28 | Asia | Thailand | polyprotein | Dengue virus 3 |
| QTX93362.1 | 00638/12    | Human              | 2012-01-01 | Asia | Thailand | polyprotein | Dengue virus 3 |
| QTX93251.1 | 00798/12    | Human              | 2012-01-01 | Asia | Thailand | polyprotein | Dengue virus 3 |
| QTX93374.1 | 01467/10    | Human              | 2010-01-01 | Asia | Thailand | polyprotein | Dengue virus 3 |
| QTX93406.1 | 00912/13    | Human              | 2013-01-01 | Asia | Thailand | polyprotein | Dengue virus 3 |
| QTX93451.1 | 02704/06    | Human              | 2006-01-01 | Asia | Thailand | polyprotein | Dengue virus 3 |
| QTX93458.1 | 01423/06    | Human              | 2006-01-01 | Asia | Thailand | polyprotein | Dengue virus 3 |
| QTX93484.1 | 01601/10    | Human              | 2010-01-01 | Asia | Thailand | polyprotein | Dengue virus 3 |
| QTX93495.1 | 00831/06    | Human              | 2006-01-01 | Asia | Thailand | polyprotein | Dengue virus 3 |
| QTX93504.1 | 00651/06    | Human              | 2006-01-01 | Asia | Thailand | polyprotein | Dengue virus 3 |
| QTX93507.1 | 00749/12    | Human              | 2012-01-01 | Asia | Thailand | polyprotein | Dengue virus 3 |
| QTX93524.1 | 01041/06    | Human              | 2006-01-01 | Asia | Thailand | polyprotein | Dengue virus 3 |
| QTX93529.1 | 00323/11    | Human              | 2011-01-01 | Asia | Thailand | polyprotein | Dengue virus 3 |
| QTX93595.1 | 01379/06    | Human              | 2006-01-01 | Asia | Thailand | polyprotein | Dengue virus 3 |
| QTX93603.1 | 00112/06    | Human              | 2006-01-01 | Asia | Thailand | polyprotein | Dengue virus 3 |
| QTX93540.1 | 00509/11    | Human              | 2011-01-01 | Asia | Thailand | polyprotein | Dengue virus 3 |
| QBK46952.1 | h87-2007    | Unknown            | 2007-01-08 | Asia | Thailand | polyprotein | Dengue virus 3 |
| ASS36950.1 | CTI2-13     | Unknown            | 2013-01-06 | Asia | Thailand | polyprotein | Dengue virus 4 |
| BBG31516.1 | Th16-010DV4 | Human              | 2016-01-10 | Asia | Thailand | polyprotein | Dengue virus 4 |
| BBG31520.1 | Th17-091DV4 | Human              | 2017-01-06 | Asia | Thailand | polyprotein | Dengue virus 4 |
| QTX92101.1 | 01107/06    | Human              | 2006-01-01 | Asia | Thailand | polyprotein | Dengue virus 4 |
| QTX92124.1 | 00789/13    | Human              | 2013-01-01 | Asia | Thailand | polyprotein | Dengue virus 4 |
| QTX92133.1 | 00097/04    | Human              | 2004-01-01 | Asia | Thailand | polyprotein | Dengue virus 4 |
| QTX92164.1 | 00471/08    | Human              | 2008-01-01 | Asia | Thailand | polyprotein | Dengue virus 4 |
| QTX92178.1 | 00567/04    | Human              | 2004-01-01 | Asia | Thailand | polyprotein | Dengue virus 4 |
| QTX92188.1 | 01862/06    | Human              | 2006-01-01 | Asia | Thailand | polyprotein | Dengue virus 4 |
| QTX92199.1 | 00789/14    | Human              | 2014-01-01 | Asia | Thailand | polyprotein | Dengue virus 4 |
| QTX92226.1 | 01622/04    | Human              | 2004-01-01 | Asia | Thailand | polyprotein | Dengue virus 4 |
| QTX92377.1 | 01268/08    | Human              | 2008-01-01 | Asia | Thailand | polyprotein | Dengue virus 4 |
| QTX92269.1 | 00674/04    | Human              | 2004-01-01 | Asia | Thailand | polyprotein | Dengue virus 4 |
| QTX92280.1 | 00225/06    | Human              | 2006-01-01 | Asia | Thailand | polyprotein | Dengue virus 4 |
| QTX92286.1 | 01295/06    | Human              | 2006-01-01 | Asia | Thailand | polyprotein | Dengue virus 4 |
| QTX92304.1 | 00746/04    | Human              | 2004-01-01 | Asia | Thailand | polyprotein | Dengue virus 4 |
| QTX92312.1 | 00109/06    | Human              | 2006-01-01 | Asia | Thailand | polyprotein | Dengue virus 4 |



|            |          |       |            |      |          |             |                |
|------------|----------|-------|------------|------|----------|-------------|----------------|
| QTX92394.1 | 01769/04 | Human | 2004-01-01 | Asia | Thailand | polyprotein | Dengue virus 4 |
| AIG60035.1 | VIROAF8  | Human | 2006-05-26 | Asia | Thailand | polyprotein | Dengue virus 4 |
| QTX92358.1 | 02456/06 | Human | 2006-01-01 | Asia | Thailand | polyprotein | Dengue virus 4 |
| QTX92370.1 | 00842/06 | Human | 2006-01-01 | Asia | Thailand | polyprotein | Dengue virus 4 |
| QTE18637.1 | PDK48    | Human | 2021-01-01 | Asia | Thailand | polyprotein | Dengue virus 4 |
| QTX92135.1 | 01923/07 | Human | 2007-01-01 | Asia | Thailand | polyprotein | Dengue virus 4 |
| QTX92136.1 | 00369/11 | Human | 2011-01-01 | Asia | Thailand | polyprotein | Dengue virus 4 |
| QTX92142.1 | 00685/14 | Human | 2014-01-01 | Asia | Thailand | polyprotein | Dengue virus 4 |
| QTX92146.1 | 01130/07 | Human | 2007-01-01 | Asia | Thailand | polyprotein | Dengue virus 4 |
| QTX92150.1 | 00694/07 | Human | 2007-01-01 | Asia | Thailand | polyprotein | Dengue virus 4 |
| QTX92207.1 | 01380/08 | Human | 2008-01-01 | Asia | Thailand | polyprotein | Dengue virus 4 |
| QTX92209.1 | 00311/06 | Human | 2006-01-01 | Asia | Thailand | polyprotein | Dengue virus 4 |
| QTX92210.1 | 01711/06 | Human | 2006-01-01 | Asia | Thailand | polyprotein | Dengue virus 4 |
| QTX92096.1 | 00650/06 | Human | 2006-01-01 | Asia | Thailand | polyprotein | Dengue virus 4 |
| QTX92109.1 | 01258/04 | Human | 2004-01-01 | Asia | Thailand | polyprotein | Dengue virus 4 |
| QTX92117.1 | 00564/04 | Human | 2004-01-01 | Asia | Thailand | polyprotein | Dengue virus 4 |
| QTX92130.1 | 00171/06 | Human | 2006-01-01 | Asia | Thailand | polyprotein | Dengue virus 4 |
| QTX92180.1 | 00307/07 | Human | 2007-01-01 | Asia | Thailand | polyprotein | Dengue virus 4 |
| QTX92241.1 | 01993/07 | Human | 2007-01-01 | Asia | Thailand | polyprotein | Dengue virus 4 |
| QTX92247.1 | 00777/14 | Human | 2014-01-01 | Asia | Thailand | polyprotein | Dengue virus 4 |
| QTX92265.1 | 01494/05 | Human | 2005-01-01 | Asia | Thailand | polyprotein | Dengue virus 4 |
| QTX92267.1 | 00270/06 | Human | 2006-01-01 | Asia | Thailand | polyprotein | Dengue virus 4 |
| QTX92283.1 | 02383/06 | Human | 2006-01-01 | Asia | Thailand | polyprotein | Dengue virus 4 |
| QTX92292.1 | 00965/04 | Human | 2004-01-01 | Asia | Thailand | polyprotein | Dengue virus 4 |
| QTX92328.1 | 00717/04 | Human | 2004-01-01 | Asia | Thailand | polyprotein | Dengue virus 4 |
| QTX92383.1 | 01928/06 | Human | 2006-01-01 | Asia | Thailand | polyprotein | Dengue virus 4 |
| QTX92369.1 | 01278/06 | Human | 2006-01-01 | Asia | Thailand | polyprotein | Dengue virus 4 |
| QTX92371.1 | 02392/07 | Human | 2007-01-01 | Asia | Thailand | polyprotein | Dengue virus 4 |
| QTX92093.1 | 00575/14 | Human | 2014-01-01 | Asia | Thailand | polyprotein | Dengue virus 4 |
| QTX92104.1 | 01559/09 | Human | 2009-01-01 | Asia | Thailand | polyprotein | Dengue virus 4 |
| QTX92106.1 | 02606/06 | Human | 2006-01-01 | Asia | Thailand | polyprotein | Dengue virus 4 |
| QTX92152.1 | 00637/12 | Human | 2012-01-01 | Asia | Thailand | polyprotein | Dengue virus 4 |
| QTX92157.1 | 00618/05 | Human | 2005-01-01 | Asia | Thailand | polyprotein | Dengue virus 4 |
| QTX92162.1 | 01174/06 | Human | 2006-01-01 | Asia | Thailand | polyprotein | Dengue virus 4 |



|            |             |       |            |      |          |             |                |
|------------|-------------|-------|------------|------|----------|-------------|----------------|
| QTX92173.1 | 00524/06    | Human | 2006-01-01 | Asia | Thailand | polyprotein | Dengue virus 4 |
| QTX92184.1 | 01012/13    | Human | 2013-01-01 | Asia | Thailand | polyprotein | Dengue virus 4 |
| QTX92187.1 | 01382/06    | Human | 2006-01-01 | Asia | Thailand | polyprotein | Dengue virus 4 |
| QTX92192.1 | 01270/10    | Human | 2010-01-01 | Asia | Thailand | polyprotein | Dengue virus 4 |
| QTX92201.1 | 01677/10    | Human | 2010-01-01 | Asia | Thailand | polyprotein | Dengue virus 4 |
| QTX92309.1 | 00775/05    | Human | 2005-01-01 | Asia | Thailand | polyprotein | Dengue virus 4 |
| QTX92393.1 | 00365/14    | Human | 2014-01-01 | Asia | Thailand | polyprotein | Dengue virus 4 |
| QTX92342.1 | 00728/14    | Human | 2014-01-01 | Asia | Thailand | polyprotein | Dengue virus 4 |
| QTX92347.1 | 00714/05    | Human | 2005-01-01 | Asia | Thailand | polyprotein | Dengue virus 4 |
| BBG31515.1 | Th16-006DV4 | Human | 2016-01-09 | Asia | Thailand | polyprotein | Dengue virus 4 |
| BBG31521.1 | Th17-098DV4 | Human | 2017-01-06 | Asia | Thailand | polyprotein | Dengue virus 4 |
| QTX92111.1 | 02674/06    | Human | 2006-01-01 | Asia | Thailand | polyprotein | Dengue virus 4 |
| QTX92113.1 | 01261/06    | Human | 2006-01-01 | Asia | Thailand | polyprotein | Dengue virus 4 |
| QTX92138.1 | 01270/06    | Human | 2006-01-01 | Asia | Thailand | polyprotein | Dengue virus 4 |
| QTX92154.1 | 02198/06    | Human | 2006-01-01 | Asia | Thailand | polyprotein | Dengue virus 4 |
| QTX92167.1 | 00801/13    | Human | 2013-01-01 | Asia | Thailand | polyprotein | Dengue virus 4 |
| QTX92183.1 | 00854/05    | Human | 2005-01-01 | Asia | Thailand | polyprotein | Dengue virus 4 |
| QTX92189.1 | 00274/08    | Human | 2008-01-01 | Asia | Thailand | polyprotein | Dengue virus 4 |
| QTX92200.1 | 01009/05    | Human | 2005-01-01 | Asia | Thailand | polyprotein | Dengue virus 4 |
| QTX92203.1 | 01579/06    | Human | 2006-01-01 | Asia | Thailand | polyprotein | Dengue virus 4 |
| QTX92204.1 | 01391/07    | Human | 2007-01-01 | Asia | Thailand | polyprotein | Dengue virus 4 |
| QTX92129.1 | 02187/06    | Human | 2006-01-01 | Asia | Thailand | polyprotein | Dengue virus 4 |
| QTX92220.1 | 00433/07    | Human | 2007-01-01 | Asia | Thailand | polyprotein | Dengue virus 4 |
| QTX92225.1 | 00752/14    | Human | 2014-01-01 | Asia | Thailand | polyprotein | Dengue virus 4 |
| QTX92231.1 | 00514/14    | Human | 2014-01-01 | Asia | Thailand | polyprotein | Dengue virus 4 |
| QTX92256.1 | 00615/14    | Human | 2014-01-01 | Asia | Thailand | polyprotein | Dengue virus 4 |
| QTX92293.1 | 02498/06    | Human | 2006-01-01 | Asia | Thailand | polyprotein | Dengue virus 4 |
| QTX92319.1 | 02194/06    | Human | 2006-01-01 | Asia | Thailand | polyprotein | Dengue virus 4 |
| QTX92335.1 | 01104/12    | Human | 2012-01-01 | Asia | Thailand | polyprotein | Dengue virus 4 |
| QTX92337.1 | 00367/06    | Human | 2006-01-01 | Asia | Thailand | polyprotein | Dengue virus 4 |
| QTX92380.1 | 00781/09    | Human | 2009-01-01 | Asia | Thailand | polyprotein | Dengue virus 4 |
| QTX92357.1 | 01719/04    | Human | 2004-01-01 | Asia | Thailand | polyprotein | Dengue virus 4 |







[illegible]



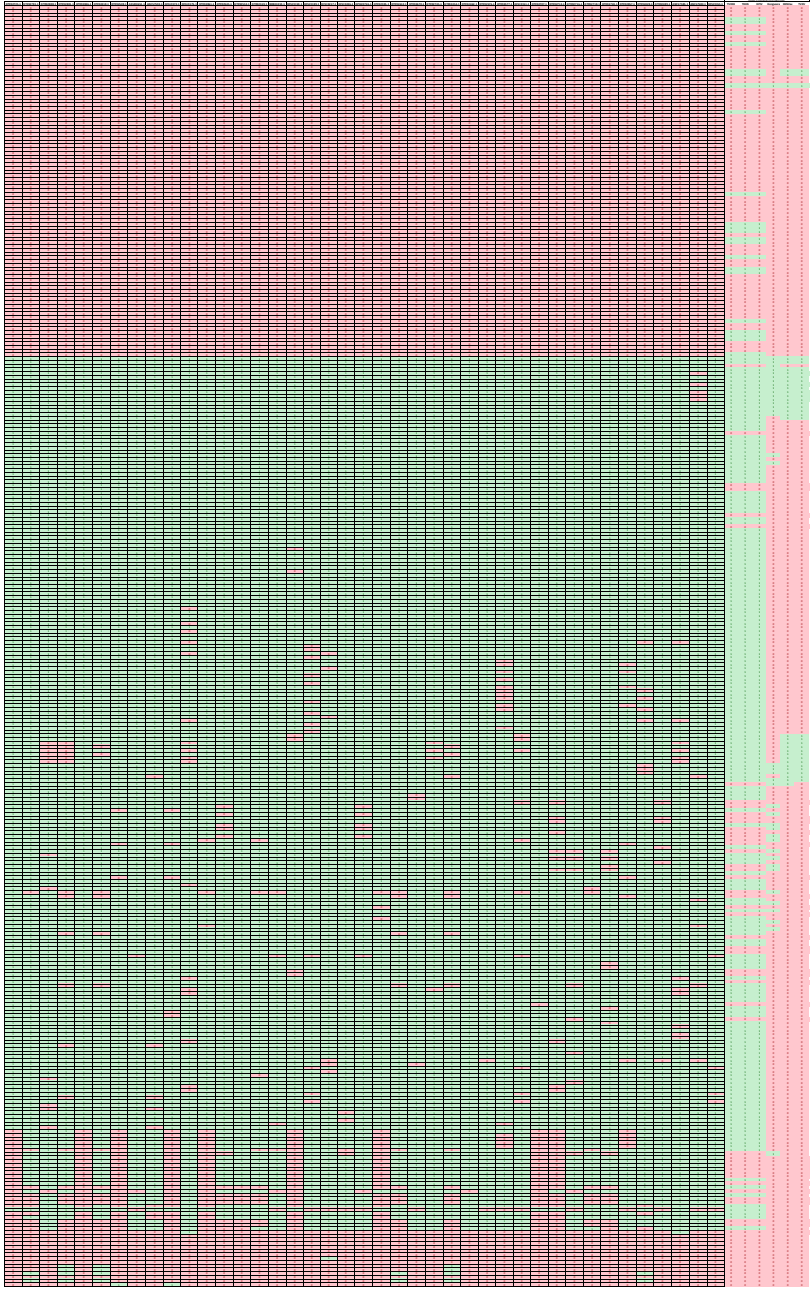



|  |  |  |  |  |  |  |  |  |  |  |  |  |  |  |  |  |  |  |  |  |  |  |  |  |  |  |  |  |  |  |  |  |  |  |  |  |  |  |  |  |  |  |  |  |  |  |  |  |  |  |  |  |  |  |  |  |  |  |  |  |  |  |  |  |  |  |  |  |  |  |  |  |  |  |  |  |  |  |  |  |  |  |  |  |  |  |  |  |  |  |  |  |  |  |  |  |  |  |  |  |  |  |  |  |  |  |  |  |  |  |  |  |  |  |  |  |  |  |  |  |  |  |  |  |  |  |  |  |  |  |  |  |  |  |  |  |  |  |  |  |  |  |  |  |  |  |  |  |  |  |  |  |  |  |  |  |  |  |  |  |  |  |  |  |  |  |  |  |  |  |  |  |  |  |  |  |  |  |  |  |  |  |  |  |  |  |  |  |  |  |  |  |  |  |  |  |  |  |  |  |  |  |  |  |  |  |  |  |  |  |  |  |  |  |  |  |  |  |  |  |  |  |  |  |  |  |  |  |  |  |  |  |  |  |  |  |  |  |  |  |  |  |  |  |  |  |  |  |  |  |  |  |  |  |  |  |  |  |  |  |  |  |  |  |  |  |  |  |  |  |  |  |  |  |  |  |  |  |  |  |  |  |  |  |  |  |  |  |  |  |  |  |  |  |  |  |  |  |  |  |  |  |  |  |  |  |  |  |  |  |  |  |  |  |  |  |  |  |  |  |  |  |  |  |  |  |  |  |  |  |  |  |  |  |  |  |  |  |  |  |  |  |  |  |  |  |  |  |  |  |  |  |  |  |  |  |  |  |  |  |  |  |  |  |  |  |  |  |  |  |  |  |  |  |  |  |  |  |  |  |  |  |  |  |  |  |  |  |  |  |  |  |  |  |  |  |  |  |  |  |  |  |  |  |  |  |  |  |  |  |  |  |  |  |  |  |  |  |  |  |  |  |  |  |  |  |  |  |  |  |  |  |  |  |  |  |  |  |  |  |  |  |  |  |  |  |  |  |  |  |  |  |  |  |  |  |  |  |  |  |  |  |  |  |  |  |  |  |  |  |  |  |  |  |  |  |  |  |  |  |  |  |  |  |  |  |  |  |  |  |  |  |  |  |  |  |  |  |  |  |  |  |  |  |  |  |  |  |  |  |  |  |  |  |  |  |  |  |  |  |  |  |  |  |  |  |  |  |  |  |  |  |  |  |  |  |  |  |  |  |  |  |  |  |  |  |  |  |  |  |  |  |  |  |  |  |  |  |  |  |  |  |  |  |  |  |  |  |  |  |  |  |  |  |  |  |  |  |  |  |  |  |  |  |  |  |  |  |  |  |  |  |  |  |  |  |  |  |  |  |  |  |  |  |  |  |  |  |  |  |  |  |  |  |  |  |  |  |  |  |  |  |  |  |  |  |  |  |  |  |  |  |  |  |  |  |  |  |  |  |  |  |  |  |  |  |  |  |  |  |  |  |  |  |  |  |  |  |  |  |  |  |  |  |  |  |  |  |  |  |  |  |  |  |  |  |  |  |  |  |  |  |  |  |  |  |  |  |  |  |  |  |  |  |  |  |  |  |  |  |  |  |  |  |  |  |  |  |  |  |  |  |  |  |  |  |  |  |  |  |  |  |  |  |  |  |  |  |  |  |  |  |  |  |  |  |  |  |  |  |  |  |  |  |  |  |  |  |  |  |  |  |  |  |  |  |  |  |  |  |  |  |  |  |  |  |  |  |  |  |  |  |  |  |  |  |  |  |  |  |  |  |  |  |  |  |  |  |  |  |  |  |  |  |  |  |  |  |  |  |  |  |  |  |  |  |  |  |  |  |  |  |  |  |  |  |  |  |  |  |  |  |  |  |  |  |  |  |  |  |  |  |  |  |  |  |  |  |  |  |  |  |  |  |  |  |  |  |  |  |  |  |  |  |  |  |  |  |  |  |  |  |  |  |  |  |  |  |  |  |  |  |  |  |  |  |  |  |  |  |  |  |  |  |  |  |  |  |  |  |  |  |  |  |  |  |  |  |  |  |  |  |  |  |  |  |  |  |  |  |  |  |  |  |  |  |  |  |  |  |  |  |  |  |  |  |  |  |  |  |  |  |  |  |  |  |  |  |  |  |  |  |  |  |  |  |  |  |  |  |  |  |  |  |  |  |  |  |  |  |  |  |  |  |  |  |  |  |  |  |  |  |  |  |  |  |  |  |  |  |  |  |  |  |  |  |  |  |  |  |  |  |  |  |  |  |  |  |  |  |  |  |  |  |  |  |  |  |  |  |  |  |  |  |  |  |  |  |  |  |  |  |  |  |  |  |  |  |  |  |  |  |  |  |  |  |  |  |  |  |  |  |  |  |  |  |  |  |  |  |  |  |  |  |  |  |  |  |  |  |  |  |  |  |  |  |  |  |  |  |  |  |  |  |  |  |  |  |  |  |  |  |  |  |  |  |  |  |  |  |  |  |  |  |  |  |  |  |  |  |  |  |  |  |  |  |  |  |  |  |  |  |  |  |  |  |  |  |  |  |  |  |  |  |  |  |  |  |  |  |  |  |  |  |  |  |  |  |  |  |  |  |  |  |  |  |  |  |  |  |  |  |  |  |  |  |  |  |  |  |  |  |  |  |  |  |  |  |  |  |  |  |  |  |  |  |  |  |  |  |  |  |  |  |  |  |  |  |  |  |  |  |  |  |  |  |  |  |  |  |  |  |  |  |  |  |  |  |  |  |  |  |  |  |  |  |  |  |  |  |  |  |  |  |  |  |  |  |  |  |  |  |  |  |  |  |  |  |  |  |  |  |  |  |  |  |  |  |  |  |  |  |  |  |  |  |  |  |  |  |  |  |  |  |  |  |  |  |  |  |  |  |  |  |  |  |  |  |  |  |  |  |  |  |  |  |  |  |  |  |  |  |  |  |  |  |  |  |  |  |  |  |  |  |  |  |  |  |  |  |  |  |  |  |  |  |  |  |  |  |  |  |  |  |  |  |  |  |  |  |  |  |  |  |  |  |  |  |  |  |  |  |  |  |  |  |  |  |  |  |  |  |  |  |  |  |  |  |  |  |  |  |  |  |  |  |  |  |  |  |  |  |  |  |  |  |  |  |  |  |  |  |  |  |  |  |  |
|--|--|--|--|--|--|--|--|--|--|--|--|--|--|--|--|--|--|--|--|--|--|--|--|--|--|--|--|--|--|--|--|--|--|--|--|--|--|--|--|--|--|--|--|--|--|--|--|--|--|--|--|--|--|--|--|--|--|--|--|--|--|--|--|--|--|--|--|--|--|--|--|--|--|--|--|--|--|--|--|--|--|--|--|--|--|--|--|--|--|--|--|--|--|--|--|--|--|--|--|--|--|--|--|--|--|--|--|--|--|--|--|--|--|--|--|--|--|--|--|--|--|--|--|--|--|--|--|--|--|--|--|--|--|--|--|--|--|--|--|--|--|--|--|--|--|--|--|--|--|--|--|--|--|--|--|--|--|--|--|--|--|--|--|--|--|--|--|--|--|--|--|--|--|--|--|--|--|--|--|--|--|--|--|--|--|--|--|--|--|--|--|--|--|--|--|--|--|--|--|--|--|--|--|--|--|--|--|--|--|--|--|--|--|--|--|--|--|--|--|--|--|--|--|--|--|--|--|--|--|--|--|--|--|--|--|--|--|--|--|--|--|--|--|--|--|--|--|--|--|--|--|--|--|--|--|--|--|--|--|--|--|--|--|--|--|--|--|--|--|--|--|--|--|--|--|--|--|--|--|--|--|--|--|--|--|--|--|--|--|--|--|--|--|--|--|--|--|--|--|--|--|--|--|--|--|--|--|--|--|--|--|--|--|--|--|--|--|--|--|--|--|--|--|--|--|--|--|--|--|--|--|--|--|--|--|--|--|--|--|--|--|--|--|--|--|--|--|--|--|--|--|--|--|--|--|--|--|--|--|--|--|--|--|--|--|--|--|--|--|--|--|--|--|--|--|--|--|--|--|--|--|--|--|--|--|--|--|--|--|--|--|--|--|--|--|--|--|--|--|--|--|--|--|--|--|--|--|--|--|--|--|--|--|--|--|--|--|--|--|--|--|--|--|--|--|--|--|--|--|--|--|--|--|--|--|--|--|--|--|--|--|--|--|--|--|--|--|--|--|--|--|--|--|--|--|--|--|--|--|--|--|--|--|--|--|--|--|--|--|--|--|--|--|--|--|--|--|--|--|--|--|--|--|--|--|--|--|--|--|--|--|--|--|--|--|--|--|--|--|--|--|--|--|--|--|--|--|--|--|--|--|--|--|--|--|--|--|--|--|--|--|--|--|--|--|--|--|--|--|--|--|--|--|--|--|--|--|--|--|--|--|--|--|--|--|--|--|--|--|--|--|--|--|--|--|--|--|--|--|--|--|--|--|--|--|--|--|--|--|--|--|--|--|--|--|--|--|--|--|--|--|--|--|--|--|--|--|--|--|--|--|--|--|--|--|--|--|--|--|--|--|--|--|--|--|--|--|--|--|--|--|--|--|--|--|--|--|--|--|--|--|--|--|--|--|--|--|--|--|--|--|--|--|--|--|--|--|--|--|--|--|--|--|--|--|--|--|--|--|--|--|--|--|--|--|--|--|--|--|--|--|--|--|--|--|--|--|--|--|--|--|--|--|--|--|--|--|--|--|--|--|--|--|--|--|--|--|--|--|--|--|--|--|--|--|--|--|--|--|--|--|--|--|--|--|--|--|--|--|--|--|--|--|--|--|--|--|--|--|--|--|--|--|--|--|--|--|--|--|--|--|--|--|--|--|--|--|--|--|--|--|--|--|--|--|--|--|--|--|--|--|--|--|--|--|--|--|--|--|--|--|--|--|--|--|--|--|--|--|--|--|--|--|--|--|--|--|--|--|--|--|--|--|--|--|--|--|--|--|--|--|--|--|--|--|--|--|--|--|--|--|--|--|--|--|--|--|--|--|--|--|--|--|--|--|--|--|--|--|--|--|--|--|--|--|--|--|--|--|--|--|--|--|--|--|--|--|--|--|--|--|--|--|--|--|--|--|--|--|--|--|--|--|--|--|--|--|--|--|--|--|--|--|--|--|--|--|--|--|--|--|--|--|--|--|--|--|--|--|--|--|--|--|--|--|--|--|--|--|--|--|--|--|--|--|--|--|--|--|--|--|--|--|--|--|--|--|--|--|--|--|--|--|--|--|--|--|--|--|--|--|--|--|--|--|--|--|--|--|--|--|--|--|--|--|--|--|--|--|--|--|--|--|--|--|--|--|--|--|--|--|--|--|--|--|--|--|--|--|--|--|--|--|--|--|--|--|--|--|--|--|--|--|--|--|--|--|--|--|--|--|--|--|--|--|--|--|--|--|--|--|--|--|--|--|--|--|--|--|--|--|--|--|--|--|--|--|--|--|--|--|--|--|--|--|--|--|--|--|--|--|--|--|--|--|--|--|--|--|--|--|--|--|--|--|--|--|--|--|--|--|--|--|--|--|--|--|--|--|--|--|--|--|--|--|--|--|--|--|--|--|--|--|--|--|--|--|--|--|--|--|--|--|--|--|--|--|--|--|--|--|--|--|--|--|--|--|--|--|--|--|--|--|--|--|--|--|--|--|--|--|--|--|--|--|--|--|--|--|--|--|--|--|--|--|--|--|--|--|--|--|--|--|--|--|--|--|--|--|--|--|--|--|--|--|--|--|--|--|--|--|--|--|--|--|--|--|--|--|--|--|--|--|--|--|--|--|--|--|--|--|--|--|--|--|--|--|--|--|--|--|--|--|--|--|--|--|--|--|--|--|--|--|--|--|--|--|--|--|--|--|--|--|--|--|--|--|--|--|--|--|--|--|--|--|--|--|--|--|--|--|--|--|--|--|--|--|--|--|--|--|--|--|--|--|--|--|--|--|--|--|--|--|--|--|--|--|--|--|--|--|--|--|--|--|--|--|--|--|--|--|--|--|--|--|--|--|--|--|--|--|--|--|--|--|--|--|--|--|--|--|--|--|--|--|--|--|--|--|--|--|--|--|--|--|--|--|--|--|--|--|--|--|--|--|--|--|--|--|--|--|--|--|--|--|--|--|--|--|--|--|--|--|--|--|--|--|--|--|--|--|--|--|--|--|--|--|--|--|--|--|--|--|--|--|--|--|--|--|--|--|--|--|--|--|--|--|--|--|--|--|--|--|--|--|--|--|--|--|--|--|--|--|--|--|--|--|--|--|--|--|--|--|--|--|--|--|--|--|--|--|--|--|--|--|--|--|
|  |  |  |  |  |  |  |  |  |  |  |  |  |  |  |  |  |  |  |  |  |  |  |  |  |  |  |  |  |  |  |  |  |  |  |  |  |  |  |  |  |  |  |  |  |  |  |  |  |  |  |  |  |  |  |  |  |  |  |  |  |  |  |  |  |  |  |  |  |  |  |  |  |  |  |  |  |  |  |  |  |  |  |  |  |  |  |  |  |  |  |  |  |  |  |  |  |  |  |  |  |  |  |  |  |  |  |  |  |  |  |  |  |  |  |  |  |  |  |  |  |  |  |  |  |  |  |  |  |  |  |  |  |  |  |  |  |  |  |  |  |  |  |  |  |  |  |  |  |  |  |  |  |  |  |  |  |  |  |  |  |  |  |  |  |  |  |  |  |  |  |  |  |  |  |  |  |  |  |  |  |  |  |  |  |  |  |  |  |  |  |  |  |  |  |  |  |  |  |  |  |  |  |  |  |  |  |  |  |  |  |  |  |  |  |  |  |  |  |  |  |  |  |  |  |  |  |  |  |  |  |  |  |  |  |  |  |  |  |  |  |  |  |  |  |  |  |  |  |  |  |  |  |  |  |  |  |  |  |  |  |  |  |  |  |  |  |  |  |  |  |  |  |  |  |  |  |  |  |  |  |  |  |  |  |  |  |  |  |  |  |  |  |  |  |  |  |  |  |  |  |  |  |  |  |  |  |  |  |  |  |  |  |  |  |  |  |  |  |  |  |  |  |  |  |  |  |  |  |  |  |  |  |  |  |  |  |  |  |  |  |  |  |  |  |  |  |  |  |  |  |  |  |  |  |  |  |  |  |  |  |  |  |  |  |  |  |  |  |  |  |  |  |  |  |  |  |  |  |  |  |  |  |  |  |  |  |  |  |  |  |  |  |  |  |  |  |  |  |  |  |  |  |  |  |  |  |  |  |  |  |  |  |  |  |  |  |  |  |  |  |  |  |  |  |  |  |  |  |  |  |  |  |  |  |  |  |  |  |  |  |  |  |  |  |  |  |  |  |  |  |  |  |  |  |  |  |  |  |  |  |  |  |  |  |  |  |  |  |  |  |  |  |  |  |  |  |  |  |  |  |  |  |  |  |  |  |  |  |  |  |  |  |  |  |  |  |  |  |  |  |  |  |  |  |  |  |  |  |  |  |  |  |  |  |  |  |  |  |  |  |  |  |  |  |  |  |  |  |  |  |  |  |  |  |  |  |  |  |  |  |  |  |  |  |  |  |  |  |  |  |  |  |  |  |  |  |  |  |  |  |  |  |  |  |  |  |  |  |  |  |  |  |  |  |  |  |  |  |  |  |  |  |  |  |  |  |  |  |  |  |  |  |  |  |  |  |  |  |  |  |  |  |  |  |  |  |  |  |  |  |  |  |  |  |  |  |  |  |  |  |  |  |  |  |  |  |  |  |  |  |  |  |  |  |  |  |  |  |  |  |  |  |  |  |  |  |  |  |  |  |  |  |  |  |  |  |  |  |  |  |  |  |  |  |  |  |  |  |  |  |  |  |  |  |  |  |  |  |  |  |  |  |  |  |  |  |  |  |  |  |  |  |  |  |  |  |  |  |  |  |  |  |  |  |  |  |  |  |  |  |  |  |  |  |  |  |  |  |  |  |  |  |  |  |  |  |  |  |  |  |  |  |  |  |  |  |  |  |  |  |  |  |  |  |  |  |  |  |  |  |  |  |  |  |  |  |  |  |  |  |  |  |  |  |  |  |  |  |  |  |  |  |  |  |  |  |  |  |  |  |  |  |  |  |  |  |  |  |  |  |  |  |  |  |  |  |  |  |  |  |  |  |  |  |  |  |  |  |  |  |  |  |  |  |  |  |  |  |  |  |  |  |  |  |  |  |  |  |  |  |  |  |  |  |  |  |  |  |  |  |  |  |  |  |  |  |  |  |  |  |  |  |  |  |  |  |  |  |  |  |  |  |  |  |  |  |  |  |  |  |  |  |  |  |  |  |  |  |  |  |  |  |  |  |  |  |  |  |  |  |  |  |  |  |  |  |  |  |  |  |  |  |  |  |  |  |  |  |  |  |  |  |  |  |  |  |  |  |  |  |  |  |  |  |  |  |  |  |  |  |  |  |  |  |  |  |  |  |  |  |  |  |  |  |  |  |  |  |  |  |  |  |  |  |  |  |  |  |  |  |  |  |  |  |  |  |  |  |  |  |  |  |  |  |  |  |  |  |  |  |  |  |  |  |  |  |  |  |  |  |  |  |  |  |  |  |  |  |  |  |  |  |  |  |  |  |  |  |  |  |  |  |  |  |  |  |  |  |  |  |  |  |  |  |  |  |  |  |  |  |  |  |  |  |  |  |  |  |  |  |  |  |  |  |  |  |  |  |  |  |  |  |  |  |  |  |  |  |  |  |  |  |  |  |  |  |  |  |  |  |  |  |  |  |  |  |  |  |  |  |  |  |  |  |  |  |  |  |  |  |  |  |  |  |  |  |  |  |  |  |  |  |  |  |  |  |  |  |  |  |  |  |  |  |  |  |  |  |  |  |  |  |  |  |  |  |  |  |  |  |  |  |  |  |  |  |  |  |  |  |  |  |  |  |  |  |  |  |  |  |  |  |  |  |  |  |  |  |  |  |  |  |  |  |  |  |  |  |  |  |  |  |  |  |  |  |  |  |  |  |  |  |  |  |  |  |  |  |  |  |  |  |  |  |  |  |  |  |  |  |  |  |  |  |  |  |  |  |  |  |  |  |  |  |  |  |  |  |  |  |  |  |  |  |  |  |  |  |  |  |  |  |  |  |  |  |  |  |  |  |  |  |  |  |  |  |  |  |  |  |  |  |  |  |  |  |  |  |  |  |  |  |  |  |  |  |  |  |  |  |  |  |  |  |  |  |  |  |  |  |  |  |  |  |  |  |  |  |  |  |  |  |  |  |  |  |  |  |  |  |  |  |  |  |  |  |  |  |  |  |  |  |  |  |  |  |  |  |  |  |  |  |  |  |  |  |  |  |  |  |  |  |  |  |  |  |  |  |  |  |  |  |  |  |  |  |  |  |  |  |  |  |  |  |  |  |  |  |  |  |  |  |  |  |  |  |  |  |  |  |  |  |  |  |  |  |  |  |  |  |  |  |  |  |  |  |  |
|--|--|--|--|--|--|--|--|--|--|--|--|--|--|--|--|--|--|--|--|--|--|--|--|--|--|--|--|--|--|--|--|--|--|--|--|--|--|--|--|--|--|--|--|--|--|--|--|--|--|--|--|--|--|--|--|--|--|--|--|--|--|--|--|--|--|--|--|--|--|--|--|--|--|--|--|--|--|--|--|--|--|--|--|--|--|--|--|--|--|--|--|--|--|--|--|--|--|--|--|--|--|--|--|--|--|--|--|--|--|--|--|--|--|--|--|--|--|--|--|--|--|--|--|--|--|--|--|--|--|--|--|--|--|--|--|--|--|--|--|--|--|--|--|--|--|--|--|--|--|--|--|--|--|--|--|--|--|--|--|--|--|--|--|--|--|--|--|--|--|--|--|--|--|--|--|--|--|--|--|--|--|--|--|--|--|--|--|--|--|--|--|--|--|--|--|--|--|--|--|--|--|--|--|--|--|--|--|--|--|--|--|--|--|--|--|--|--|--|--|--|--|--|--|--|--|--|--|--|--|--|--|--|--|--|--|--|--|--|--|--|--|--|--|--|--|--|--|--|--|--|--|--|--|--|--|--|--|--|--|--|--|--|--|--|--|--|--|--|--|--|--|--|--|--|--|--|--|--|--|--|--|--|--|--|--|--|--|--|--|--|--|--|--|--|--|--|--|--|--|--|--|--|--|--|--|--|--|--|--|--|--|--|--|--|--|--|--|--|--|--|--|--|--|--|--|--|--|--|--|--|--|--|--|--|--|--|--|--|--|--|--|--|--|--|--|--|--|--|--|--|--|--|--|--|--|--|--|--|--|--|--|--|--|--|--|--|--|--|--|--|--|--|--|--|--|--|--|--|--|--|--|--|--|--|--|--|--|--|--|--|--|--|--|--|--|--|--|--|--|--|--|--|--|--|--|--|--|--|--|--|--|--|--|--|--|--|--|--|--|--|--|--|--|--|--|--|--|--|--|--|--|--|--|--|--|--|--|--|--|--|--|--|--|--|--|--|--|--|--|--|--|--|--|--|--|--|--|--|--|--|--|--|--|--|--|--|--|--|--|--|--|--|--|--|--|--|--|--|--|--|--|--|--|--|--|--|--|--|--|--|--|--|--|--|--|--|--|--|--|--|--|--|--|--|--|--|--|--|--|--|--|--|--|--|--|--|--|--|--|--|--|--|--|--|--|--|--|--|--|--|--|--|--|--|--|--|--|--|--|--|--|--|--|--|--|--|--|--|--|--|--|--|--|--|--|--|--|--|--|--|--|--|--|--|--|--|--|--|--|--|--|--|--|--|--|--|--|--|--|--|--|--|--|--|--|--|--|--|--|--|--|--|--|--|--|--|--|--|--|--|--|--|--|--|--|--|--|--|--|--|--|--|--|--|--|--|--|--|--|--|--|--|--|--|--|--|--|--|--|--|--|--|--|--|--|--|--|--|--|--|--|--|--|--|--|--|--|--|--|--|--|--|--|--|--|--|--|--|--|--|--|--|--|--|--|--|--|--|--|--|--|--|--|--|--|--|--|--|--|--|--|--|--|--|--|--|--|--|--|--|--|--|--|--|--|--|--|--|--|--|--|--|--|--|--|--|--|--|--|--|--|--|--|--|--|--|--|--|--|--|--|--|--|--|--|--|--|--|--|--|--|--|--|--|--|--|--|--|--|--|--|--|--|--|--|--|--|--|--|--|--|--|--|--|--|--|--|--|--|--|--|--|--|--|--|--|--|--|--|--|--|--|--|--|--|--|--|--|--|--|--|--|--|--|--|--|--|--|--|--|--|--|--|--|--|--|--|--|--|--|--|--|--|--|--|--|--|--|--|--|--|--|--|--|--|--|--|--|--|--|--|--|--|--|--|--|--|--|--|--|--|--|--|--|--|--|--|--|--|--|--|--|--|--|--|--|--|--|--|--|--|--|--|--|--|--|--|--|--|--|--|--|--|--|--|--|--|--|--|--|--|--|--|--|--|--|--|--|--|--|--|--|--|--|--|--|--|--|--|--|--|--|--|--|--|--|--|--|--|--|--|--|--|--|--|--|--|--|--|--|--|--|--|--|--|--|--|--|--|--|--|--|--|--|--|--|--|--|--|--|--|--|--|--|--|--|--|--|--|--|--|--|--|--|--|--|--|--|--|--|--|--|--|--|--|--|--|--|--|--|--|--|--|--|--|--|--|--|--|--|--|--|--|--|--|--|--|--|--|--|--|--|--|--|--|--|--|--|--|--|--|--|--|--|--|--|--|--|--|--|--|--|--|--|--|--|--|--|--|--|--|--|--|--|--|--|--|--|--|--|--|--|--|--|--|--|--|--|--|--|--|--|--|--|--|--|--|--|--|--|--|--|--|--|--|--|--|--|--|--|--|--|--|--|--|--|--|--|--|--|--|--|--|--|--|--|--|--|--|--|--|--|--|--|--|--|--|--|--|--|--|--|--|--|--|--|--|--|--|--|--|--|--|--|--|--|--|--|--|--|--|--|--|--|--|--|--|--|--|--|--|--|--|--|--|--|--|--|--|--|--|--|--|--|--|--|--|--|--|--|--|--|--|--|--|--|--|--|--|--|--|--|--|--|--|--|--|--|--|--|--|--|--|--|--|--|--|--|--|--|--|--|--|--|--|--|--|--|--|--|--|--|--|--|--|--|--|--|--|--|--|--|--|--|--|--|--|--|--|--|--|--|--|--|--|--|--|--|--|--|--|--|--|--|--|--|--|--|--|--|--|--|--|--|--|--|--|--|--|--|--|--|--|--|--|--|--|--|--|--|--|--|--|--|--|--|--|--|--|--|--|--|--|--|--|--|--|--|--|--|--|--|--|--|--|--|--|--|--|--|--|--|--|--|--|--|--|--|--|--|--|--|--|--|--|--|--|--|--|--|--|--|--|--|--|--|--|--|--|--|--|--|--|--|--|--|--|--|--|--|--|--|--|--|--|--|--|--|--|--|--|--|--|--|--|--|--|--|--|--|--|--|--|--|--|--|--|--|--|--|--|--|--|--|--|--|--|--|--|--|--|--|--|--|--|--|--|--|--|--|--|--|--|--|--|--|--|--|--|--|--|--|--|--|--|--|--|--|--|--|--|--|--|--|--|--|--|--|--|--|--|--|--|--|--|--|--|



[illegible]



[illegible]



|          |                  |      |      |      |                           |           |                |                    |              |              |   |   |   |   |   |   |   |   |   |   |   |   |   |   |   |   |   |   |
|----------|------------------|------|------|------|---------------------------|-----------|----------------|--------------------|--------------|--------------|---|---|---|---|---|---|---|---|---|---|---|---|---|---|---|---|---|---|
| 539233   | EMLRTRVGTGTHALL  | N52a | 1148 | 1162 | HLA-DRB1*08:03            | 81%-<100% | Dengue virus 2 | ELISPOT            | IFNg release | Positive     |   | 1 | 1 | 1 | 1 | 1 | 1 | 0 | 1 | 1 | 1 | 1 | 0 | 1 | 1 | 0 | 1 | 0 |
| 539540   | LALLAAKVRPTFAA   | N52a | 1202 | 1216 | HLA-DRB1*14:04            | 81%-<100% | Dengue virus 2 | ELISPOT            | IFNg release | Positive     |   | 1 | 1 | 1 | 1 | 1 | 1 | 0 | 1 | 1 | 1 | 1 | 0 | 1 | 1 | 0 | 1 | 0 |
| 539562   | LGMMLVKVRNMEKY   | N52a | 1256 | 1270 | HLA-DRB1*12:02            | 81%-<100% | Dengue virus 2 | ELISPOT            | IFNg release | Positive     |   | 1 | 1 | 1 | 1 | 1 | 1 | 0 | 1 | 1 | 1 | 1 | 0 | 0 | 0 | 0 | 0 | 0 |
| 539686   | MMVLXKVRNMEKQL   | N52a | 1264 | 1258 | HLA-DRB1*14:06            | 81%-<100% | Dengue virus 2 | ELISPOT            | IFNg release | Positive     |   | 1 | 1 | 1 | 1 | 1 | 0 | 1 | 1 | 1 | 1 | 1 | 0 | 0 | 0 | 0 | 0 | 0 |
| 540026   | VAVSVPLTIGMMSF   | N52a | 1163 | 1177 | HLA-DRB1*10:01            | 81%-<100% | Dengue virus 2 | ELISPOT            | IFNg release | Positive     |   | 1 | 1 | 1 | 1 | 1 | 1 | 0 | 1 | 1 | 1 | 1 | 0 | 1 | 1 | 0 | 1 | 0 |
| 540047   | VTLLAAKVRPT      | N52a | 1199 | 1213 | HLA-DRB1*12:02            | 81%-<100% | Dengue virus 2 | ELISPOT            | IFNg release | Positive     |   | 1 | 1 | 1 | 1 | 1 | 1 | 0 | 1 | 1 | 1 | 1 | 0 | 1 | 1 | 0 | 1 | 0 |
| 540154   | YUALLAAFRPTFTA   | N52a | 1201 | 1215 | HLA-DRB1*14:04            | 81%-<100% | Dengue virus 2 | ELISPOT            | IFNg release | Positive     |   | 1 | 1 | 1 | 1 | 1 | 1 | 0 | 1 | 1 | 1 | 1 | 0 | 1 | 1 | 1 | 0 | 1 |
| 740700   | VVSVPSSLTSQQQ    | N52a | 1188 | 1202 | HLA-DRB1*01:02            | 81%-<100% | Dengue virus 2 | ELISPOT            | IFNg release | Positive     |   | 1 | 1 | 1 | 1 | 1 | 1 | 1 | 0 | 1 | 1 | 1 | 0 | 1 | 0 | 0 | 1 | 0 |
| 866978   | GMALEELMRTRVG    | N52a | 1141 | 1155 | HLA-DQA1*01:01/DOBI*05:01 | 81%-<100% | Dengue virus 2 | ELISPOT            | IFNg release | Positive     |   | 1 | 1 | 1 | 1 | 1 | 1 | 1 | 0 | 1 | 1 | 1 | 0 | 1 | 1 | 0 | 1 | 0 |
| 868918   | SLOGLGMALEELMR   | N52a | 1136 | 1150 | HLA-DQA1*05:01/DOBI*02:01 | 81%-<100% | Dengue virus 2 | ELISPOT            | IFNg release | Positive     |   | 1 | 1 | 1 | 1 | 1 | 1 | 1 | 0 | 1 | 1 | 1 | 1 | 0 | 1 | 1 | 0 | 1 |
| 869209   | TLHALLVAUSPRL    | N52a | 1156 | 1170 | HLA-DPB1*04:01            | 81%-<100% | Dengue virus 2 | ELISPOT            | IFNg release | Positive     |   | 1 | 1 | 1 | 1 | 1 | 1 | 1 | 0 | 1 | 1 | 1 | 1 | 0 | 1 | 1 | 0 | 1 |
| 195210   | EICQTILRLLGV     | N52b | 11   | 105  | HLA-B*11:01               | 81%-<100% | Dengue virus 2 | ELISPOT            | IFNg release | Positive     |   | 1 | 1 | 1 | 1 | 1 | 1 | 1 | 0 | 1 | 1 | 1 | 1 | 0 | 1 | 1 | 0 | 1 |
| 195723   | LTILIRTLVLSGL    | N52b | 1440 | 1454 | HLA-DRB1*15:06            | 81%-<100% | Dengue virus 2 | ELISPOT            | IFNg release | Positive     |   | 1 | 1 | 1 | 1 | 1 | 1 | 1 | 0 | 1 | 1 | 1 | 1 | 0 | 1 | 1 | 0 | 1 |
| 195869   | QTLIURLTLGLVIS   | N52b | 1438 | 1452 | HLA-DRB1*15:01            | 81%-<100% | Dengue virus 2 | ELISPOT            | IFNg release | Positive     |   | 1 | 1 | 1 | 1 | 1 | 1 | 1 | 0 | 1 | 1 | 1 | 1 | 0 | 1 | 1 | 0 | 1 |
| 1067121  | BKKVGLVNGVWTRS   | N53  | 1619 | 1633 | HLA-DRB1*15:01            | 81%-<100% | Dengue virus 2 | ELISPOT            | IFNg release | Positive     |   | 1 | 1 | 1 | 1 | 1 | 1 | 1 | 0 | 1 | 1 | 1 | 1 | 0 | 1 | 1 | 0 | 1 |
| 123272   | HETGRIVOLMHCHAT  | N53  | 250  | 264  | HLA class II              | 81%-<100% | Dengue virus 2 | ELISPOT            | IFNg release | Positive     |   | 1 | 1 | 1 | 1 | 1 | 1 | 1 | 0 | 1 | 1 | 1 | 1 | 0 | 1 | 1 | 0 | 1 |
| 1392187M | GNVSKVLSCHMTAPIS | N53  | 1728 | 1742 |                           |           | Dengue virus 2 | biosocial activity | activation   | Positive     |   | 1 | 1 | 1 | 1 | 1 | 1 | 1 | 0 | 1 | 1 | 1 | 1 | 0 | 1 | 1 | 0 | 1 |
| 139756   | GKTORLYPAIVEARI  | N53  | 1673 | 1687 | HLA-DRB1*09:01            | 81%-<100% | Dengue virus 2 | ELISPOT            | IFNg release | Positive     |   | 1 | 1 | 1 | 1 | 1 | 1 | 1 | 0 | 1 | 1 | 1 | 1 | 0 | 1 | 1 | 0 | 1 |
| 139762   | GLPIRYQTPAIRAEH  | N53  | 1712 | 1726 | HLA-DRB1*04:03            | 81%-<100% | Dengue virus 2 | ELISPOT            | IFNg release | Positive     |   | 1 | 1 | 1 | 1 | 1 | 1 | 1 | 0 | 1 | 1 | 1 | 1 | 0 | 1 | 1 | 0 | 1 |
| 180698   | PNYLIIMDEAHTD    | N53  | 1751 | 1765 | HLA class II              | 81%-<100% | Dengue virus 2 | ELISPOT            | IFNg release | Positive     |   | 1 | 1 | 1 | 1 | 1 | 1 | 1 | 0 | 1 | 1 | 1 | 1 | 0 | 1 | 1 | 0 | 1 |
| 180807   | VTDFKGVTVVFPVSI  | N53  | 1826 | 1840 | HLA class II              | 81%-<100% | Dengue virus 2 | ELISPOT            | IFNg release | Positive-Low |   | 1 | 1 | 1 | 1 | 1 | 1 | 1 | 0 | 1 | 1 | 1 | 1 | 0 | 1 | 1 | 0 | 1 |
| 195154   | ALRGPIRYQTPAIR   | N53  | 1709 | 1723 | HLA-DRB1*08:02            | 81%-<100% | Dengue virus 2 | ELISPOT            | IFNg release | Positive     |   | 1 | 1 | 1 | 1 | 1 | 1 | 1 | 0 | 1 | 1 | 1 | 1 | 0 | 1 | 1 | 0 | 1 |
| 195194   | FHTMMVTRGALVHM   | N53  | 1521 | 1535 | HLA-DRB1*07:01            | 81%-<100% | Dengue virus 2 | ELISPOT            | IFNg release | Positive     |   | 1 | 1 | 1 | 1 | 1 | 1 | 1 | 0 | 1 | 1 | 1 | 1 | 0 | 1 | 1 | 0 | 1 |
| 195420   | GTHTMVHMVIRGVAL  | N53  | 1519 | 1533 | HLA-DRB1*07:01            | 81%-<100% | Dengue virus 2 | ELISPOT            | IFNg release | Positive     |   | 1 | 1 | 1 | 1 | 1 | 1 | 1 | 0 | 1 | 1 | 1 | 1 | 0 | 1 | 1 | 0 | 1 |
| 195564   | KGKVLVNGVNGVTR   | N53  | 1618 | 1632 | HLA-DRB1*15:01            | 81%-<100% | Dengue virus 2 | ELISPOT            | IFNg release | Positive     |   | 1 | 1 | 1 | 1 | 1 | 1 | 1 | 0 | 1 | 1 | 1 | 1 | 0 | 1 | 1 | 0 | 1 |
| 195888   | RGLRTLILAPTRVVA  | N53  | 1689 | 1703 | HLA-DRB1*08:02            | 81%-<100% | Dengue virus 2 | ELISPOT            | IFNg release | Positive     |   | 1 | 1 | 1 | 1 | 1 | 1 | 1 | 0 | 1 | 1 | 1 | 1 | 0 | 1 | 1 | 0 | 1 |
| 21115    | GLRTLILAPTRVVA   | N53  | 1690 | 1704 | HLA-DRB1*04:03            | 81%-<100% | Dengue virus 2 | ELISPOT            | IFNg release | Positive     |   | 1 | 1 | 1 | 1 | 1 | 1 | 1 | 0 | 1 | 1 | 1 | 1 | 0 | 1 | 1 | 0 | 1 |
| 26965    | ILAPTRVVAEMEA    | N53  | 1695 | 1709 | HLA-DQA1*03:01/DOBI*03:02 | 81%-<100% | Dengue virus 2 | ELISPOT            | IFNg release | Positive     |   | 1 | 1 | 1 | 1 | 1 | 1 | 1 | 0 | 1 | 1 | 1 | 1 | 0 | 1 | 1 | 0 | 1 |
| 30236    | KEGGLVIRPWLDA    | N53  | 584  | 598  | HLA class II              | 81%-<100% | Dengue virus 2 | ELISPOT            | IFNg release | Positive     |   | 1 | 1 | 1 | 1 | 1 | 1 | 1 | 0 | 1 | 1 | 1 | 1 | 0 | 1 | 1 | 0 | 1 |
| 31725    | KVQVLSKRTSDYES   | N53  | 1855 | 1869 | HLA-DRB1*12:02            | 81%-<100% | Dengue virus 2 | ELISPOT            | IFNg release | Positive     |   | 1 | 1 | 1 | 1 | 1 | 1 | 1 | 0 | 1 | 1 | 1 | 1 | 0 | 1 | 1 | 0 | 1 |
| 34231    | KVVLGVNGVWTRSG   | N53  | 145  | 159  | HLA class II              | 81%-<100% | Dengue virus 2 | ELISPOT            | IFNg release | Positive     |   | 1 | 1 | 1 | 1 | 1 | 1 | 1 | 0 | 1 | 1 | 1 | 1 | 0 | 1 | 1 | 0 | 1 |
| 36560    | LIMIDEAHTDPAISI  | N53  | 1755 | 1769 | HLA-DQA1*01:01/DOBI*05:01 | 81%-<100% | Dengue virus 2 | ELISPOT            | IFNg release | Positive     |   | 1 | 1 | 1 | 1 | 1 | 1 | 1 | 0 | 1 | 1 | 1 | 1 | 0 | 1 | 1 | 0 | 1 |
| 39103    | HLGPIRYQTPAIRA   | N53  | 1696 | 1710 | HLA-DRB1*12:02            | 81%-<100% | Dengue virus 2 | ELISPOT            | IFNg release | Positive     |   | 1 | 1 | 1 | 1 | 1 | 1 | 1 | 0 | 1 | 1 | 1 | 1 | 0 | 1 | 1 | 0 | 1 |
| 39125    | LNTLIRTRVVAE     | N53  | 1691 | 1705 | HLA-DRB1*12:02            | 81%-<100% | Dengue virus 2 | ELISPOT            | IFNg release | Positive     |   | 1 | 1 | 1 | 1 | 1 | 1 | 1 | 0 | 1 | 1 | 1 | 1 | 0 | 1 | 1 | 0 | 1 |
| 4152     | ABGYSTRVMEALGA   | N53  | 1757 | 1771 | HLA-DRB1*04:07            | 81%-<100% | Dengue virus 2 | ELISPOT            | IFNg release | Positive     |   | 1 | 1 | 1 | 1 | 1 | 1 | 1 | 0 | 1 | 1 | 1 | 1 | 0 | 1 | 1 | 0 | 1 |
| 49766    | PTRVVAEMEAELG    | N53  | 223  | 237  | HLA-DRB1*15:01            | 81%-<100% | Dengue virus 2 | ICS                | IFNg release | Positive     |   | 1 | 1 | 1 | 1 | 1 | 1 | 1 | 0 | 1 | 1 | 1 | 1 | 0 | 1 | 1 | 0 | 1 |
| 539025   | AAGIFMTATPGSRD   | N53  | 1784 | 1798 | HLA-DRB1*04:03            | 81%-<100% | Dengue virus 2 | ELISPOT            | IFNg release | Positive     | 0 | 1 | 1 | 1 | 1 | 1 | 1 | 1 | 0 | 1 | 1 | 1 | 1 | 0 | 1 | 1 | 0 | 1 |
| 539041   | AEMEALRGLPIRYQ   | N53  | 1704 | 1718 | HLA-DRB1*13:01            | 81%-<100% | Dengue virus 2 | ELISPOT            | IFNg release | Positive     |   | 1 | 1 | 1 | 1 | 1 | 1 | 1 | 0 | 1 | 1 | 1 | 1 | 0 | 1 | 1 | 0 | 1 |
| 539203   | EEBVLVPMFPMVHS   | N53  | 1899 | 1913 | HLA-DRB1*09:01            | 81%-<100% | Dengue virus 2 | ELISPOT            | IFNg release | Positive     |   | 1 | 1 | 1 | 1 | 1 | 1 | 1 | 0 | 1 | 1 | 1 | 1 | 0 | 1 | 1 | 0 | 1 |
| 539267M  | GEAAQSNKATPPGS   | N53  | 1782 | 1796 | HLA-DRB1*04:03            | 81%-<100% | Dengue virus 2 | ELISPOT            | IFNg release | Positive     | 0 | 1 | 1 | 1 | 1 | 1 | 1 | 1 | 0 | 1 | 1 | 1 | 1 | 0 | 1 | 1 | 0 | 1 |
| 539448   | IVREAKIRGLTULI   | N53  | 1682 | 1696 | HLA-DRB1*12:02            | 81%-<100% | Dengue virus 2 | ELISPOT            | IFNg release | Positive     |   | 1 | 1 | 1 | 1 | 1 | 1 | 1 | 0 | 1 | 1 | 1 | 1 | 0 | 1 | 1 | 0 | 1 |
| 539467   | KGKTVVFPVPSKAGN  | N53  | 1830 | 1844 | HLA-DRB1*08:03            | 81%-<100% | Dengue virus 2 | ELISPOT            | IFNg release | Positive     |   | 1 | 1 | 1 | 1 | 1 | 1 | 1 | 0 | 1 | 1 | 1 | 1 | 0 | 1 | 1 | 0 | 1 |
| 539573   | LILAPTRVVAEMEA   | N53  | 1694 | 1708 | HLA-DRB1*13:01            | 81%-<100% | Dengue virus 2 | ELISPOT            | IFNg release | Positive     |   | 1 | 1 | 1 | 1 | 1 | 1 | 1 | 0 | 1 | 1 | 1 | 1 | 0 | 1 | 1 | 0 | 1 |
| 539713   | NGKVLQVLSKRTDS   | N53  | 1853 | 1867 | HLA-DRB1*12:02            | 81%-<100% | Dengue virus 2 | ELISPOT            | IFNg release | Positive     |   | 1 | 1 | 1 | 1 | 1 | 1 | 1 | 0 | 1 | 1 | 1 | 1 | 0 | 1 | 1 | 0 | 1 |
| 539859   | RGLPIRYQTPAIRAE  | N53  | 1711 | 1725 | HLA-DRB1*13:01            | 81%-<100% | Dengue virus 2 | ELISPOT            | IFNg release | Positive     |   | 1 | 1 | 1 | 1 | 1 | 1 | 1 | 0 | 1 | 1 | 1 | 1 | 0 | 1 | 1 | 0 | 1 |
| 539871   | RGLPIRYQTPAIRAE  | N53  | 1711 | 1725 | HLA-DRB1*13:01            | 81%-<100% | Dengue virus 2 | ELISPOT            | IFNg release | Positive     |   | 1 | 1 | 1 | 1 | 1 | 1 | 1 | 0 | 1 | 1 | 1 | 1 | 0 | 1 | 1 | 0 | 1 |
| 539872   | RGLPIRYQTPAIRAE  | N53  | 1711 | 1725 | HLA-DRB1*13:01            | 81%-<100% | Dengue virus 2 | ELISPOT            | IFNg release | Positive     |   | 1 | 1 | 1 | 1 | 1 | 1 | 1 | 0 | 1 | 1 | 1 | 1 | 0 | 1 | 1 | 0 | 1 |
| 540056   | BLMHKGGKREPSPAD  | N53  | 1518 | 1532 | HLA-DRB1*13:01            | 81%-<100% | Dengue virus 2 | ELISPOT            | IFNg release | Positive     |   | 1 | 1 | 1 | 1 | 1 | 1 | 1 | 0 | 1 | 1 | 1 | 1 | 0 | 1 | 1 | 0 | 1 |
| 61672    | FHTMMVHVTYRGVLM  | N53  | 45   | 59   | HLA class II              | 81%-<100% | Dengue virus 2 | ELISPOT            | IFNg release | Positive     |   | 1 | 1 | 1 | 1 | 1 | 1 | 1 | 0 | 1 | 1 | 1 | 1 | 0 | 1 | 1 | 0 | 1 |
| 64466    | TKRYLPAVREAKR    | N53  | 200  | 214  | HLA class II              | 81%-<100% | Dengue virus 2 | ELISPOT            | IFNg release | Positive     |   | 1 | 1 | 1 | 1 | 1 | 1 | 1 | 0 | 1 | 1 | 1 | 1 | 0 | 1 | 1 | 0 | 1 |
| 740081   | REAKIRGLTULILAP  | N53  | 1670 | 1684 | HLA-DRB1*14:06            | 81%-<100% | Dengue virus 2 | ELISPOT            | IFNg release | Positive     |   | 1 | 1 | 1 | 1 | 1 | 1 | 1 | 0 | 1 | 1 | 1 | 1 | 0 | 1 | 1 | 0 | 1 |
| 740193   | RTLILAPTRVVAEM   | N53  | 1678 | 1692 | HLA-DRB1*14:06            | 81%-<100% | Dengue virus 2 | ELISPOT            | IFNg release | Positive     |   | 1 | 1 | 1 | 1 | 1 | 1 | 1 | 0 | 1 | 1 | 1 | 1 | 0 | 1 | 1 | 0 | 1 |
| 866724   | EALRGLPIRYQTPA   | N53  | 1708 | 1722 | HLA-B*01:01               | 81%-<100% | Dengue virus 2 | ELISPOT            | IFNg release | Positive     |   | 1 | 1 | 1 | 1 | 1 | 1 | 1 | 0 | 1 | 1 | 1 | 1 | 0 | 1 | 1 | 0 | 1 |
| 868724   | RTHNDWFPVTTDISE  | N53  | 1873 | 1887 | HLA-DQA1*03:01/DOBI*03:02 | 81%-<100% | Dengue virus 2 | ELISPOT            | IFNg release | Positive     |   | 1 | 1 | 1 | 1 | 1 | 1 | 1 | 0 | 1 | 1 | 1 | 1 | 0 | 1 | 1 | 0 | 1 |
| 868734   | RYLPAVREAKIRGL   | N53  | 1677 | 1691 | HLA-DRB4*01:01            | 81%-<100% | Dengue virus 2 | ELISPOT            | IFNg release | Positive     |   | 1 | 1 | 1 | 1 | 1 | 1 | 1 | 0 | 1 | 1 | 1 | 1 | 0 | 1 | 1 | 0 | 1 |
| 869224   | TULAPTRVVAEMEA   | N53  | 1693 | 1707 | HLA-DQA1*01:02/DOBI*06:02 | 81%-<100% | Dengue virus 2 | ELISPOT            | IFNg release | Positive     |   | 1 | 1 | 1 | 1 | 1 | 1 | 1 | 0 | 1 | 1 | 1 | 1 | 0 | 1 | 1 | 0 | 1 |
| 8911     | DKKGVGLVNGVGVV   |      |      |      |                           |           |                |                    |              |              |   |   |   |   |   |   |   |   |   |   |   |   |   |   |   |   |   |   |



|        |                   |      |      |      |                           |            |                |         |               |          |   |   |   |   |   |   |   |   |   |   |   |   |   |   |   |   |   |   |   |
|--------|-------------------|------|------|------|---------------------------|------------|----------------|---------|---------------|----------|---|---|---|---|---|---|---|---|---|---|---|---|---|---|---|---|---|---|---|
| 869426 | VEWEEIPLGKRED     | NS5  | 3321 | 3335 | HLA-DQA1*01:01/DOB1*05:01 | 81%- <100% | Dengue virus 2 | ELISPOT | IFN-g release | Positive | 1 | 1 | 1 | 1 | 1 | 1 | 1 | 1 | 0 | 1 | 1 | 1 | 1 | 0 | 1 | 1 | 0 | 1 | 0 |
| 150105 | AFRLRLTIPTTAGT    | C    | 52   | 66   | HLA-DRB1*01:01            | 51%-80%    | Dengue virus 2 | ELISPOT | IFN-g release | Positive | 0 | 1 | 1 | 1 | 1 | 1 | 1 | 1 | 0 | 1 | 1 | 1 | 1 | 0 | 1 | 1 | 0 | 1 | 0 |
| 150247 | GMIMILPIVMAFHIL   | C    | 103  | 117  | HLA-DRB1*01:01            | 51%-80%    | Dengue virus 2 | ELISPOT | IFN-g release | Positive | 1 | 0 | 1 | 1 | 0 | 1 | 1 | 1 | 0 | 1 | 0 | 1 | 1 | 0 | 1 | 1 | 0 | 1 | 0 |
| 150597 | LFMALVAIRLRTITP   | C    | 46   | 60   | HLA class II              | 51%-80%    | Dengue virus 2 | ELISPOT | IFN-g release | Positive | 0 | 1 | 1 | 1 | 1 | 1 | 1 | 1 | 0 | 1 | 0 | 1 | 1 | 0 | 1 | 1 | 1 | 0 | 0 |
| 195120 | AGMIMLPIVMAFH     | C    | 102  | 116  | HLA-DRB1*08:02            | 51%-80%    | Dengue virus 2 | ELISPOT | IFN-g release | Positive | 1 | 0 | 1 | 0 | 1 | 0 | 1 | 1 | 0 | 1 | 0 | 1 | 1 | 0 | 1 | 1 | 0 | 1 | 0 |
| 195307 | FMALVAFRLFTIPT    | C    | 47   | 61   | HLA-DRB1*11:01            | 51%-80%    | Dengue virus 2 | ELISPOT | IFN-g release | Positive | 0 | 1 | 1 | 1 | 1 | 1 | 1 | 1 | 0 | 1 | 0 | 1 | 1 | 1 | 1 | 0 | 1 | 0 | 0 |
| 195496 | IIMLPIVMAFHILT    | C    | 105  | 119  | HLA-DRB1*01:02            | 51%-80%    | Dengue virus 2 | ELISPOT | IFN-g release | Positive | 1 | 0 | 1 | 1 | 0 | 1 | 0 | 1 | 1 | 0 | 1 | 0 | 1 | 0 | 1 | 1 | 0 | 1 | 0 |
| 195730 | LVAFRLFTIPTTAG    | C    | 50   | 64   | HLA-DRB1*04:01            | 51%-80%    | Dengue virus 2 | ELISPOT | IFN-g release | Positive | 0 | 1 | 1 | 1 | 1 | 1 | 1 | 1 | 0 | 1 | 0 | 1 | 1 | 0 | 1 | 1 | 0 | 1 | 0 |
| 195741 | MAVAIRLRTIPTT     | C    | 48   | 62   | HLA-DRB1*01:01            | 51%-80%    | Dengue virus 2 | ELISPOT | IFN-g release | Positive | 0 | 1 | 1 | 1 | 1 | 1 | 1 | 1 | 0 | 1 | 0 | 1 | 1 | 1 | 0 | 1 | 0 | 1 | 0 |
| 196091 | VAFRLFTIPTTAGI    | C    | 51   | 65   | HLA-DRB1*04:01            | 51%-80%    | Dengue virus 2 | ELISPOT | IFN-g release | Positive | 1 | 0 | 1 | 1 | 1 | 1 | 1 | 1 | 0 | 1 | 0 | 1 | 1 | 1 | 0 | 1 | 0 | 1 | 0 |
| 530981 | ALVAFRLTIPTTA     | C    | 49   | 63   | HLA-DRB1*12:02            | 51%-80%    | Dengue virus 2 | ELISPOT | IFN-g release | Positive | 0 | 1 | 1 | 1 | 1 | 1 | 1 | 1 | 0 | 1 | 0 | 1 | 1 | 0 | 1 | 1 | 0 | 1 | 0 |
| 150490 | PGFTIMAILAYTIG    | PreM | 245  | 259  | HLA-DRB1*01:01            | 51%-80%    | Dengue virus 2 | ELISPOT | IFN-g release | Positive | 1 | 1 | 1 | 1 | 1 | 0 | 1 | 1 | 0 | 0 | 1 | 1 | 1 | 1 | 1 | 1 | 0 | 1 | 0 |
| 195322 | FORVLILLTAVAP     | PreM | 263  | 277  | HLA-DRB1*07:01            | 51%-80%    | Dengue virus 2 | ELISPOT | IFN-g release | Positive | 1 | 1 | 1 | 1 | 1 | 0 | 1 | 1 | 1 | 1 | 1 | 1 | 1 | 0 | 0 | 0 | 0 | 0 | 0 |
| 195702 | LHRPGFTIMAILAY    | PreM | 242  | 256  | HLA-DRB1*11:01            | 51%-80%    | Dengue virus 2 | ELISPOT | IFN-g release | Positive | 1 | 1 | 1 | 1 | 1 | 0 | 1 | 1 | 1 | 0 | 1 | 1 | 1 | 1 | 1 | 1 | 0 | 1 | 0 |
| 195461 | QRVLVILLTAVAP     | PreM | 264  | 278  | HLA-DRB1*08:02            | 51%-80%    | Dengue virus 2 | ELISPOT | IFN-g release | Positive | 1 | 1 | 1 | 1 | 1 | 0 | 0 | 1 | 1 | 1 | 1 | 1 | 1 | 1 | 1 | 1 | 0 | 0 | 0 |
| 195892 | RIFTWLIRHPGFTIM   | PreM | 122  | 136  | HLA-DRB1*15:01            | 51%-80%    | Dengue virus 2 | ELISPOT | IFN-g release | Positive | 1 | 0 | 1 | 0 | 0 | 0 | 1 | 1 | 1 | 0 | 1 | 1 | 1 | 0 | 0 | 0 | 0 | 0 | 0 |
| 180590 | LDPELKEAKOPAT     | E    | 41   | 55   | HLA class II              | 51%-80%    | Dengue virus 2 | ELISPOT | IFN-g release | Positive | 1 | 0 | 1 | 0 | 1 | 0 | 1 | 1 | 1 | 0 | 0 | 1 | 1 | 0 | 1 | 1 | 1 | 1 | 1 |
| 195952 | SGVSWTMKILGVIE    | E    | 449  | 463  | HLA-DRB1*15:01            | 51%-80%    | Dengue virus 2 | ELISPOT | IFN-g release | Positive | 1 | 0 | 1 | 0 | 1 | 0 | 1 | 1 | 0 | 1 | 0 | 1 | 0 | 1 | 0 | 1 | 1 | 0 | 0 |
| 196022 | SWTMKILGVITVIT    | E    | 452  | 466  | HLA-DRB1*08:02            | 51%-80%    | Dengue virus 2 | ELISPOT | IFN-g release | Positive | 1 | 0 | 1 | 0 | 1 | 0 | 1 | 1 | 1 | 0 | 1 | 0 | 1 | 0 | 1 | 0 | 1 | 1 | 0 |
| 180603 | LYSWGTWTKGAKMNS   | NS1  | 111  | 125  | HLA class II              | 51%-80%    | Dengue virus 2 | ELISPOT | IFN-g release | Positive | 1 | 0 | 1 | 0 | 1 | 0 | 1 | 1 | 0 | 1 | 0 | 1 | 0 | 1 | 1 | 0 | 1 | 0 | 0 |
| 195207 | CTLAVVSPISLLT     | NS2a | 1144 | 1158 | HLA-DRB1*07:01            | 51%-80%    | Dengue virus 2 | ELISPOT | IFN-g release | Positive | 1 | 0 | 1 | 0 | 1 | 0 | 1 | 1 | 1 | 0 | 0 | 1 | 1 | 0 | 0 | 1 | 0 | 1 | 0 |
| 195650 | LKVIRNMEKYQLAVT   | NS2a | 1261 | 1275 | HLA-DRB1*13:01            | 51%-80%    | Dengue virus 2 | ELISPOT | IFN-g release | Positive | 1 | 1 | 0 | 1 | 0 | 1 | 1 | 1 | 0 | 1 | 1 | 1 | 1 | 0 | 0 | 0 | 0 | 0 | 0 |
| 195752 | MEKYQLAVTIMALC    | NS2a | 1154 | 1168 | HLA-DRB1*04:07            | 51%-80%    | Dengue virus 2 | ELISPOT | IFN-g release | Positive | 1 | 1 | 0 | 1 | 1 | 1 | 1 | 1 | 0 | 1 | 1 | 1 | 1 | 0 | 1 | 0 | 1 | 0 | 0 |
| 195798 | NMEKYQLAVTIMAL    | NS2a | 1266 | 1280 | HLA-DRB1*04:01            | 51%-80%    | Dengue virus 2 | ELISPOT | IFN-g release | Positive | 1 | 1 | 0 | 1 | 1 | 1 | 0 | 1 | 0 | 1 | 1 | 1 | 1 | 0 | 1 | 0 | 1 | 0 | 0 |
| 196174 | VRNMEKYQLAVTIMA   | NS2a | 1264 | 1278 | HLA-DRB1*13:01            | 51%-80%    | Dengue virus 2 | ELISPOT | IFN-g release | Positive | 1 | 1 | 0 | 1 | 1 | 1 | 0 | 1 | 0 | 1 | 1 | 1 | 1 | 0 | 1 | 0 | 1 | 0 | 0 |
| 196218 | WVWSCTLVAVSVSP    | NS2a | 1292 | 1306 | HLA-DRB1*04:01            | 51%-80%    | Dengue virus 2 | ELISPOT | IFN-g release | Positive | 1 | 0 | 1 | 0 | 1 | 0 | 1 | 1 | 0 | 1 | 0 | 1 | 1 | 0 | 1 | 0 | 1 | 0 | 0 |
| 530474 | KVRNMEKYQLAVT     | NS2a | 1252 | 1276 | HLA-DRB1*13:01            | 51%-80%    | Dengue virus 2 | ELISPOT | IFN-g release | Positive | 1 | 0 | 1 | 0 | 1 | 0 | 1 | 1 | 0 | 1 | 0 | 1 | 1 | 0 | 1 | 0 | 1 | 0 | 0 |
| 867216 | ILCPVNAVILQNAWK   | NS2a | 1279 | 1293 | HLA-DQA1*01:02/DOB1*06:02 | 51%-80%    | Dengue virus 2 | ELISPOT | IFN-g release | Positive | 0 | 1 | 0 | 1 | 1 | 0 | 1 | 1 | 0 | 0 | 1 | 1 | 1 | 0 | 1 | 1 | 0 | 1 | 0 |
| 867571 | LCVPNAVILQNAWK    | NS2a | 1280 | 1294 | HLA-DRB4*01:01            | 51%-80%    | Dengue virus 2 | ELISPOT | IFN-g release | Positive | 0 | 1 | 0 | 1 | 1 | 0 | 1 | 1 | 0 | 0 | 1 | 1 | 0 | 1 | 1 | 0 | 1 | 0 | 0 |
| 150433 | MAVGMSVILASSLLK   | NS2b | 1354 | 1368 | HLA-DRB1*01:01            | 51%-80%    | Dengue virus 2 | ELISPOT | IFN-g release | Positive | 1 | 0 | 1 | 0 | 1 | 1 | 1 | 1 | 0 | 1 | 0 | 1 | 0 | 1 | 0 | 1 | 0 | 1 | 0 |
| 167732 | DOAESGSSPLSTISEDG | NS2b | 63   | 82   | HLA-DP                    | 51%-80%    | Dengue virus 2 | ELISPOT | IFN-g release | Positive | 1 | 0 | 1 | 0 | 1 | 0 | 1 | 1 | 0 | 1 | 0 | 1 | 0 | 1 | 0 | 1 | 0 | 1 | 0 |
| 195512 | IMAVIRLTKGAKMNS   | NS2b | 8    | 22   | HLA-DRB1*07:01            | 51%-80%    | Dengue virus 2 | ELISPOT | IFN-g release | Positive | 1 | 0 | 1 | 0 | 1 | 0 | 1 | 1 | 0 | 1 | 0 | 1 | 0 | 1 | 0 | 1 | 0 | 1 | 0 |
| 195992 | SKLLKNDIPMTGPLV   | NS2b | 19   | 33   | HLA-DRB1*03:01            | 51%-80%    | Dengue virus 2 | ELISPOT | IFN-g release | Positive | 1 | 0 | 1 | 0 | 1 | 0 | 1 | 1 | 1 | 0 | 1 | 1 | 1 | 0 | 1 | 0 | 1 | 0 | 0 |
| 866896 | GMVSLASSLLKNDI    | NS2b | 1357 | 1371 | HLA-DPB1*01:01            | 51%-80%    | Dengue virus 2 | ELISPOT | IFN-g release | Positive | 1 | 0 | 1 | 0 | 1 | 1 | 1 | 1 | 1 | 0 | 1 | 0 | 1 | 1 | 0 | 1 | 1 | 0 | 0 |
| 195765 | MRLSLSPVRPVNLYI   | NS3  | 1742 | 1756 | HLA-DRB1*13:01            | 51%-80%    | Dengue virus 2 | ELISPOT | IFN-g release | Positive | 1 | 0 | 1 | 0 | 1 | 0 | 1 | 1 | 0 | 1 | 0 | 1 | 0 | 1 | 0 | 1 | 0 | 1 | 0 |
| 739148 | IDKKGKVGVLGVNGV   | NS3  | 1615 | 1629 | HLA-DRB1*01:02            | 51%-80%    | Dengue virus 2 | ELISPOT | IFN-g release | Positive | 1 | 0 | 1 | 0 | 1 | 0 | 1 | 1 | 1 | 0 | 1 | 0 | 1 | 1 | 0 | 1 | 0 | 1 | 0 |
| 195935 | LGMCCTIASILLWY    | NS4a | 2176 | 2190 | HLA-DRB1*07:01            | 51%-80%    | Dengue virus 2 | ELISPOT | IFN-g release | Positive | 1 | 0 | 1 | 0 | 1 | 1 | 1 | 1 | 1 | 0 | 1 | 0 | 1 | 1 | 0 | 1 | 0 | 1 | 0 |
| 195267 | MTLGMCCTIASILL    | NS4a | 2160 | 2174 | HLA-DRB1*07:01            | 51%-80%    | Dengue virus 2 | ELISPOT | IFN-g release | Positive | 1 | 0 | 1 | 0 | 1 | 1 | 1 | 1 | 0 | 1 | 0 | 1 | 1 | 0 | 1 | 0 | 1 | 0 | 0 |
| 150611 | TAALLLVVHAHYAIG   | NS4b | 2351 | 2365 | HLA-DRB1*01:01            | 51%-80%    | Dengue virus 2 | ELISPOT | IFN-g release | Positive | 0 | 1 | 1 | 1 | 1 | 0 | 1 | 1 | 1 | 0 | 0 | 1 | 1 | 1 | 1 | 0 | 0 | 0 | 0 |
| 150636 | TLTAALLLVVHAHYA   | NS4b | 2335 | 2349 | HLA-DRB1*01:01            | 51%-80%    | Dengue virus 2 | ELISPOT | IFN-g release | Positive | 0 | 1 | 1 | 1 | 1 | 0 | 1 | 1 | 1 | 0 | 0 | 1 | 1 | 1 | 0 | 1 | 0 | 0 | 0 |
| 195115 | AGAGLLFSIMKNTNT   | NS4b | 2474 | 2488 | HLA-DRB1*11:01            | 51%-80%    | Dengue virus 2 | ELISPOT | IFN-g release | Positive | 1 | 0 | 1 | 0 | 1 | 0 | 1 | 0 | 1 | 0 | 1 | 1 | 0 | 1 | 0 | 1 | 0 | 1 | 0 |
| 195347 | GAGLLFSIMKNTNTT   | NS4b | 2475 | 2489 | HLA-DRB1*11:01            | 51%-80%    | Dengue virus 2 | ELISPOT | IFN-g release | Positive | 1 | 0 | 1 | 0 | 1 | 0 | 1 | 1 | 0 | 1 | 0 | 1 | 0 | 1 | 0 | 1 | 0 | 1 | 0 |
| 195629 | LFSSIMKNTNTRGT    | NS4b | 2479 | 2493 | HLA-DRB1*03:01            | 51%-80%    | Dengue virus 2 | ELISPOT | IFN-g release | Positive | 1 | 0 | 1 | 0 | 1 | 0 | 1 | 1 | 1 | 0 | 1 | 0 | 1 | 0 | 1 | 0 | 1 | 0 | 0 |
| 195658 | LFSSIMKNTNTRBG    | NS4b | 2478 | 2492 | HLA-DRB1*04:01            | 51%-80%    | Dengue virus 2 | ELISPOT | IFN-g release | Positive | 1 | 0 | 1 | 0 | 1 | 0 | 1 | 1 | 1 | 0 | 1 | 0 | 1 | 0 | 1 | 0 | 1 | 0 | 0 |
| 195980 | SGVNPITLTAALLL    | NS4b | 2343 | 2357 | HLA-DQA1*01:02/DOB1*06:02 | 51%-80%    | Dengue virus 2 | ELISPOT | IFN-g release | Positive | 0 | 1 | 1 | 1 | 1 | 0 | 1 | 1 | 1 | 0 | 0 | 1 | 1 | 1 | 0 | 0 | 0 | 0 | 0 |
| 539327 | GLLFSIMKNTNTRR    | NS4b | 2477 | 2491 | HLA-DRB1*14:02            | 51%-80%    | Dengue virus 2 | ELISPOT | IFN-g release | Positive | 1 | 0 | 1 | 0 | 1 | 0 | 1 | 1 | 1 | 0 | 1 | 0 | 1 | 0 | 1 | 0 | 1 | 0 | 0 |
| 539755 | PASAWTLVAVATFV    | NS4b | 2277 | 2291 | HLA-DRB1*09:01            | 51%-80%    | Dengue virus 2 | ELISPOT | IFN-g release | Positive | 1 | 0 | 1 | 0 | 1 | 0 | 1 | 1 | 0 | 1 | 0 | 1 | 0 | 1 | 0 | 1 | 0 | 1 | 0 |
| 180582 | KTWAVHGSYETQIG    | NS5  | 2792 | 2806 | HLA class II              | 51%-80%    | Dengue virus 2 | ICS     | IFN-g release | Positive | 0 | 1 | 0 | 1 | 1 | 1 | 1 | 0 | 1 | 0 | 1 | 0 | 1 | 0 | 1 | 0 | 1 | 0 | 0 |
| 195442 | LHGLKIDYQKSKKE    | NS5  | 3003 | 3017 | HLA-DRB1*08:02            | 51%-80%    | Dengue virus 2 | ELISPOT | IFN-g release | Positive | 1 | 0 | 1 | 0 | 1 | 1 | 1 | 1 | 0 | 1 | 0 | 1 | 1 | 1 | 0 | 1 | 0 | 1 | 0 |
| 539195 | EAKFLTYQNKVVRVY   | NS5  | 3057 | 3071 | HLA-DRB1*01:01            | 51%-80%    | Dengue virus 2 | ELISPOT | IFN-g release | Positive | 1 | 0 | 1 | 0 | 1 | 0 | 1 | 1 | 1 | 0 | 1 | 0 | 1 | 1 | 0 | 1 | 0 | 1 | 0 |
| 539348 | GSALKRWFVERNMVY   | NS5  | 2549 | 2563 | HLA-DRB1*09:01            | 51%-80%    | Dengue virus 2 | ELISPOT | IFN-g release | Positive | 1 | 0 | 1 | 0 | 1 | 0 | 1 | 1 | 1 | 0 | 1 | 0 | 1 | 0 | 1 | 0 | 1 | 0 | 0 |
| 739166 | IFKLYQNKVVRVQR    | NS5  | 3045 | 3059 | HLA-DRB1*14:06            | 51%-80%    | Dengue virus 2 | ELISPOT | IFN-g release | Positive | 1 | 0 | 1 | 0 | 1 | 0 | 1 | 1 | 1 | 0 | 1 | 0 | 1 | 0 | 1 | 0 | 1 | 0 | 0 |
| 865656 | EHKKLAFAFLTYQK    | NS5  | 3051 | 3065 | HLA-DPB1*01:01            | 51%-80%    | Dengue virus 2 | ELISPOT | IFN-g release | Positive | 1 | 0 | 1 | 0 | 1 | 1 | 1 | 1 | 1 | 0 | 1 | 0 | 1 | 1 | 0 | 1 | 0 | 1 | 0 |
| 867419 | KKLAFAFLTYQNK     | NS5  | 3053 | 3067 | HLA-DPB1*02:01            | 51%-80%    | Dengue virus 2 | ELISPOT | IFN-g release | Positive | 1 | 0 | 1 | 0 | 1 | 1 | 1 | 1 | 1 | 0 | 1 | 0 | 1 | 1 | 0 | 1 | 0 | 1 | 0 |
| 867433 | KLASAFKLYQNKV     | C    | 3054 | 3068 | HLA-DPB1*02:01            | 51%-80%    | Dengue virus 2 | ELISPOT | IFN-g release | Positive | 1 | 0 | 1 | 0 | 1 | 1 | 1 | 1 | 1 | 0 | 1 | 0 | 1 | 1 | 0 | 1 |   |   |   |



|        |                 |     |      |      |                |           |                |         |                      |          |   |   |   |   |   |   |   |   |   |   |   |   |   |   |   |   |   |   |   |   |
|--------|-----------------|-----|------|------|----------------|-----------|----------------|---------|----------------------|----------|---|---|---|---|---|---|---|---|---|---|---|---|---|---|---|---|---|---|---|---|
| 539150 | DDRFASALTALNDMG | NSS | 3162 | 3176 | HLA-DRB1*04:03 | >0% - 50% | Denguevirus 2  | ELISPOT | IFN $\gamma$ release | Positive | 0 | 0 | 0 | 0 | 0 | 1 | 1 | 0 | 0 | 0 | 0 | 0 | 0 | 0 | 0 | 0 | 0 | 0 | 0 |   |
| 540064 | VNGVRLLTKPWdVI  | NSS | 2812 | 2826 | HLA-DRB1*12:02 | >0% - 50% | Denguevirus 2  | ELISPOT | IFN $\gamma$ release | Positive | 0 | 1 | 0 | 1 | 0 | 0 | 0 | 1 | 0 | 0 | 0 | 1 | 0 | 0 | 0 | 0 | 1 | 0 | 1 | 0 |
| 540065 | VNGVRLLTKPWdVv  | NSS | 2812 | 2826 | HLA-DRB1*12:02 | >0% - 50% | Denguevirus 2  | ELISPOT | IFN $\gamma$ release | Positive | 0 | 0 | 0 | 0 | 1 | 0 | 0 | 0 | 0 | 0 | 0 | 0 | 0 | 0 | 0 | 1 | 1 | 0 | 1 | 0 |
| 739791 | NLVRLQSGVDVFFTP | NSS | 2599 | 2613 | HLA-DRB1*01:02 | >0% - 50% | Dengue virus 2 | ELISPOT | IFN $\gamma$ release | Positive | 0 | 1 | 0 | 1 | 0 | 1 | 0 | 0 | 0 | 0 | 0 | 1 | 0 | 0 | 1 | 0 | 0 | 1 | 0 | 0 |







|   |   |   |   |   |   |   |   |   |    |    |    |    |    |    |    |    |    |    |    |    |    |    |    |    |    |    |    |    |    |    |    |    |    |    |    |    |    |    |    |    |    |    |    |    |    |    |    |    |    |    |    |    |    |    |    |    |    |    |    |    |    |    |    |    |    |    |    |    |    |    |    |    |    |    |    |    |    |    |    |    |    |    |    |    |    |    |    |    |    |    |    |    |    |    |    |    |    |    |     |     |     |     |     |     |     |     |     |     |     |     |     |     |     |     |     |     |     |     |     |     |     |     |     |     |     |     |     |     |     |     |     |     |     |     |     |     |     |     |     |     |     |     |     |     |     |     |     |     |     |     |     |     |     |     |     |     |     |     |     |     |     |     |     |     |     |     |     |     |     |     |     |     |     |     |     |     |     |     |     |     |     |     |     |     |     |     |     |     |     |     |     |     |     |     |     |     |     |     |     |     |     |     |     |     |     |     |     |     |     |     |     |     |     |     |     |     |     |     |     |     |     |     |     |     |     |     |     |     |     |     |     |     |     |     |     |     |     |     |     |     |     |     |     |     |     |     |     |     |     |     |     |     |     |     |     |     |     |     |     |     |     |     |     |     |     |     |     |     |     |     |     |     |     |     |     |     |     |     |     |     |     |     |     |     |     |     |     |     |     |     |     |     |     |     |     |     |     |     |     |     |     |     |     |     |     |     |     |     |     |     |     |     |     |     |     |     |     |     |     |     |     |     |     |     |     |     |     |     |     |     |     |     |     |     |     |     |     |     |     |     |     |     |     |     |     |     |     |     |     |     |     |     |     |     |     |     |     |     |     |     |     |     |     |     |     |     |     |     |     |     |     |     |     |     |     |     |     |     |     |     |     |     |     |     |     |     |     |     |     |     |     |     |     |     |     |     |     |     |     |     |     |     |     |     |     |     |     |     |     |     |     |     |     |     |     |     |     |     |     |     |     |     |     |     |     |     |     |     |     |     |     |     |     |     |     |     |     |     |     |     |     |     |     |     |     |     |     |     |     |     |     |     |     |     |     |     |     |     |     |     |     |     |     |     |     |     |     |     |     |     |     |     |     |     |     |     |     |     |     |     |     |     |     |     |     |     |     |     |     |     |     |     |     |     |     |     |     |     |     |     |     |     |     |     |     |     |     |     |     |     |     |     |     |     |     |     |     |     |     |     |     |     |     |     |     |     |     |     |     |     |     |     |     |     |     |     |     |     |     |     |     |     |     |     |     |     |     |     |     |     |     |     |     |     |     |     |     |     |     |     |     |     |     |     |     |     |     |     |     |     |     |     |     |     |     |     |     |     |     |     |     |     |     |     |     |     |     |     |     |     |     |     |     |     |     |     |     |     |     |     |     |     |     |     |     |     |     |     |     |     |     |     |     |     |     |     |     |     |     |     |     |     |     |     |     |     |     |     |     |     |     |     |     |     |     |     |     |     |     |     |     |     |     |     |     |     |     |     |     |     |     |     |     |     |     |     |     |     |     |     |     |     |     |     |     |     |     |     |     |     |     |     |     |     |     |     |     |     |     |     |     |     |     |     |     |     |     |     |     |     |     |     |     |     |     |     |     |     |     |     |     |     |     |     |     |     |     |     |     |     |     |     |     |     |     |     |     |     |     |     |     |     |     |     |     |     |     |     |     |     |     |     |     |     |     |     |     |     |     |     |     |     |     |     |     |     |     |     |     |     |     |     |     |     |     |     |     |     |     |     |     |     |     |     |     |     |     |     |     |     |     |     |     |     |     |     |     |     |     |     |     |     |     |     |     |     |     |     |     |     |     |     |     |     |     |     |     |     |     |     |     |     |     |     |     |     |     |     |     |     |     |     |     |     |     |     |     |     |     |     |     |     |     |     |     |     |     |     |     |     |     |     |     |     |     |     |     |     |     |     |     |     |     |     |     |     |     |     |     |     |     |     |     |     |     |     |     |     |     |     |     |     |     |     |     |     |     |     |     |     |     |     |     |     |     |     |     |     |     |     |     |     |     |     |     |     |     |     |     |     |     |     |     |     |     |     |     |     |     |     |     |     |     |     |     |     |     |     |     |     |     |     |     |     |     |     |     |     |     |     |     |     |     |     |     |     |     |     |     |     |     |     |     |     |     |     |     |     |     |     |     |     |     |     |     |     |     |     |     |     |     |     |     |     |     |     |     |     |     |     |     |     |     |     |     |     |     |     |     |     |     |     |     |     |     |     |     |     |     |     |     |     |     |     |     |     |     |     |     |     |     |     |     |     |     |     |     |     |      |
|---|---|---|---|---|---|---|---|---|----|----|----|----|----|----|----|----|----|----|----|----|----|----|----|----|----|----|----|----|----|----|----|----|----|----|----|----|----|----|----|----|----|----|----|----|----|----|----|----|----|----|----|----|----|----|----|----|----|----|----|----|----|----|----|----|----|----|----|----|----|----|----|----|----|----|----|----|----|----|----|----|----|----|----|----|----|----|----|----|----|----|----|----|----|----|----|----|----|----|-----|-----|-----|-----|-----|-----|-----|-----|-----|-----|-----|-----|-----|-----|-----|-----|-----|-----|-----|-----|-----|-----|-----|-----|-----|-----|-----|-----|-----|-----|-----|-----|-----|-----|-----|-----|-----|-----|-----|-----|-----|-----|-----|-----|-----|-----|-----|-----|-----|-----|-----|-----|-----|-----|-----|-----|-----|-----|-----|-----|-----|-----|-----|-----|-----|-----|-----|-----|-----|-----|-----|-----|-----|-----|-----|-----|-----|-----|-----|-----|-----|-----|-----|-----|-----|-----|-----|-----|-----|-----|-----|-----|-----|-----|-----|-----|-----|-----|-----|-----|-----|-----|-----|-----|-----|-----|-----|-----|-----|-----|-----|-----|-----|-----|-----|-----|-----|-----|-----|-----|-----|-----|-----|-----|-----|-----|-----|-----|-----|-----|-----|-----|-----|-----|-----|-----|-----|-----|-----|-----|-----|-----|-----|-----|-----|-----|-----|-----|-----|-----|-----|-----|-----|-----|-----|-----|-----|-----|-----|-----|-----|-----|-----|-----|-----|-----|-----|-----|-----|-----|-----|-----|-----|-----|-----|-----|-----|-----|-----|-----|-----|-----|-----|-----|-----|-----|-----|-----|-----|-----|-----|-----|-----|-----|-----|-----|-----|-----|-----|-----|-----|-----|-----|-----|-----|-----|-----|-----|-----|-----|-----|-----|-----|-----|-----|-----|-----|-----|-----|-----|-----|-----|-----|-----|-----|-----|-----|-----|-----|-----|-----|-----|-----|-----|-----|-----|-----|-----|-----|-----|-----|-----|-----|-----|-----|-----|-----|-----|-----|-----|-----|-----|-----|-----|-----|-----|-----|-----|-----|-----|-----|-----|-----|-----|-----|-----|-----|-----|-----|-----|-----|-----|-----|-----|-----|-----|-----|-----|-----|-----|-----|-----|-----|-----|-----|-----|-----|-----|-----|-----|-----|-----|-----|-----|-----|-----|-----|-----|-----|-----|-----|-----|-----|-----|-----|-----|-----|-----|-----|-----|-----|-----|-----|-----|-----|-----|-----|-----|-----|-----|-----|-----|-----|-----|-----|-----|-----|-----|-----|-----|-----|-----|-----|-----|-----|-----|-----|-----|-----|-----|-----|-----|-----|-----|-----|-----|-----|-----|-----|-----|-----|-----|-----|-----|-----|-----|-----|-----|-----|-----|-----|-----|-----|-----|-----|-----|-----|-----|-----|-----|-----|-----|-----|-----|-----|-----|-----|-----|-----|-----|-----|-----|-----|-----|-----|-----|-----|-----|-----|-----|-----|-----|-----|-----|-----|-----|-----|-----|-----|-----|-----|-----|-----|-----|-----|-----|-----|-----|-----|-----|-----|-----|-----|-----|-----|-----|-----|-----|-----|-----|-----|-----|-----|-----|-----|-----|-----|-----|-----|-----|-----|-----|-----|-----|-----|-----|-----|-----|-----|-----|-----|-----|-----|-----|-----|-----|-----|-----|-----|-----|-----|-----|-----|-----|-----|-----|-----|-----|-----|-----|-----|-----|-----|-----|-----|-----|-----|-----|-----|-----|-----|-----|-----|-----|-----|-----|-----|-----|-----|-----|-----|-----|-----|-----|-----|-----|-----|-----|-----|-----|-----|-----|-----|-----|-----|-----|-----|-----|-----|-----|-----|-----|-----|-----|-----|-----|-----|-----|-----|-----|-----|-----|-----|-----|-----|-----|-----|-----|-----|-----|-----|-----|-----|-----|-----|-----|-----|-----|-----|-----|-----|-----|-----|-----|-----|-----|-----|-----|-----|-----|-----|-----|-----|-----|-----|-----|-----|-----|-----|-----|-----|-----|-----|-----|-----|-----|-----|-----|-----|-----|-----|-----|-----|-----|-----|-----|-----|-----|-----|-----|-----|-----|-----|-----|-----|-----|-----|-----|-----|-----|-----|-----|-----|-----|-----|-----|-----|-----|-----|-----|-----|-----|-----|-----|-----|-----|-----|-----|-----|-----|-----|-----|-----|-----|-----|-----|-----|-----|-----|-----|-----|-----|-----|-----|-----|-----|-----|-----|-----|-----|-----|-----|-----|-----|-----|-----|-----|-----|-----|-----|-----|-----|-----|-----|-----|-----|-----|-----|-----|-----|-----|-----|-----|-----|-----|-----|-----|-----|-----|-----|-----|-----|-----|-----|-----|-----|-----|-----|-----|-----|-----|-----|-----|-----|-----|-----|-----|-----|-----|-----|-----|-----|-----|-----|-----|-----|-----|-----|-----|-----|-----|-----|-----|-----|-----|-----|-----|-----|-----|-----|-----|-----|-----|-----|-----|-----|-----|-----|-----|-----|-----|-----|-----|-----|-----|-----|-----|-----|-----|-----|-----|-----|-----|-----|-----|-----|-----|-----|-----|-----|-----|-----|-----|-----|-----|-----|-----|-----|-----|-----|-----|-----|-----|-----|-----|-----|-----|-----|-----|-----|-----|-----|-----|-----|-----|-----|-----|-----|-----|-----|-----|-----|-----|-----|-----|-----|-----|-----|-----|-----|-----|-----|-----|-----|-----|-----|-----|-----|-----|-----|-----|-----|-----|-----|-----|-----|-----|-----|-----|-----|-----|-----|-----|-----|-----|-----|-----|-----|-----|-----|-----|-----|-----|-----|-----|-----|-----|-----|-----|-----|-----|-----|-----|-----|-----|-----|-----|-----|-----|-----|-----|-----|-----|-----|-----|-----|-----|-----|-----|-----|-----|-----|-----|-----|-----|-----|-----|-----|-----|-----|-----|-----|-----|-----|-----|-----|-----|-----|-----|-----|-----|-----|-----|-----|-----|-----|-----|-----|-----|-----|-----|-----|-----|-----|-----|-----|-----|-----|-----|-----|-----|-----|-----|-----|-----|-----|-----|-----|-----|-----|-----|-----|-----|-----|-----|-----|-----|-----|-----|-----|-----|-----|-----|-----|-----|-----|-----|-----|-----|-----|-----|-----|-----|-----|-----|-----|-----|-----|-----|-----|------|
| 1 | 2 | 3 | 4 | 5 | 6 | 7 | 8 | 9 | 10 | 11 | 12 | 13 | 14 | 15 | 16 | 17 | 18 | 19 | 20 | 21 | 22 | 23 | 24 | 25 | 26 | 27 | 28 | 29 | 30 | 31 | 32 | 33 | 34 | 35 | 36 | 37 | 38 | 39 | 40 | 41 | 42 | 43 | 44 | 45 | 46 | 47 | 48 | 49 | 50 | 51 | 52 | 53 | 54 | 55 | 56 | 57 | 58 | 59 | 60 | 61 | 62 | 63 | 64 | 65 | 66 | 67 | 68 | 69 | 70 | 71 | 72 | 73 | 74 | 75 | 76 | 77 | 78 | 79 | 80 | 81 | 82 | 83 | 84 | 85 | 86 | 87 | 88 | 89 | 90 | 91 | 92 | 93 | 94 | 95 | 96 | 97 | 98 | 99 | 100 | 101 | 102 | 103 | 104 | 105 | 106 | 107 | 108 | 109 | 110 | 111 | 112 | 113 | 114 | 115 | 116 | 117 | 118 | 119 | 120 | 121 | 122 | 123 | 124 | 125 | 126 | 127 | 128 | 129 | 130 | 131 | 132 | 133 | 134 | 135 | 136 | 137 | 138 | 139 | 140 | 141 | 142 | 143 | 144 | 145 | 146 | 147 | 148 | 149 | 150 | 151 | 152 | 153 | 154 | 155 | 156 | 157 | 158 | 159 | 160 | 161 | 162 | 163 | 164 | 165 | 166 | 167 | 168 | 169 | 170 | 171 | 172 | 173 | 174 | 175 | 176 | 177 | 178 | 179 | 180 | 181 | 182 | 183 | 184 | 185 | 186 | 187 | 188 | 189 | 190 | 191 | 192 | 193 | 194 | 195 | 196 | 197 | 198 | 199 | 200 | 201 | 202 | 203 | 204 | 205 | 206 | 207 | 208 | 209 | 210 | 211 | 212 | 213 | 214 | 215 | 216 | 217 | 218 | 219 | 220 | 221 | 222 | 223 | 224 | 225 | 226 | 227 | 228 | 229 | 230 | 231 | 232 | 233 | 234 | 235 | 236 | 237 | 238 | 239 | 240 | 241 | 242 | 243 | 244 | 245 | 246 | 247 | 248 | 249 | 250 | 251 | 252 | 253 | 254 | 255 | 256 | 257 | 258 | 259 | 260 | 261 | 262 | 263 | 264 | 265 | 266 | 267 | 268 | 269 | 270 | 271 | 272 | 273 | 274 | 275 | 276 | 277 | 278 | 279 | 280 | 281 | 282 | 283 | 284 | 285 | 286 | 287 | 288 | 289 | 290 | 291 | 292 | 293 | 294 | 295 | 296 | 297 | 298 | 299 | 300 | 301 | 302 | 303 | 304 | 305 | 306 | 307 | 308 | 309 | 310 | 311 | 312 | 313 | 314 | 315 | 316 | 317 | 318 | 319 | 320 | 321 | 322 | 323 | 324 | 325 | 326 | 327 | 328 | 329 | 330 | 331 | 332 | 333 | 334 | 335 | 336 | 337 | 338 | 339 | 340 | 341 | 342 | 343 | 344 | 345 | 346 | 347 | 348 | 349 | 350 | 351 | 352 | 353 | 354 | 355 | 356 | 357 | 358 | 359 | 360 | 361 | 362 | 363 | 364 | 365 | 366 | 367 | 368 | 369 | 370 | 371 | 372 | 373 | 374 | 375 | 376 | 377 | 378 | 379 | 380 | 381 | 382 | 383 | 384 | 385 | 386 | 387 | 388 | 389 | 390 | 391 | 392 | 393 | 394 | 395 | 396 | 397 | 398 | 399 | 400 | 401 | 402 | 403 | 404 | 405 | 406 | 407 | 408 | 409 | 410 | 411 | 412 | 413 | 414 | 415 | 416 | 417 | 418 | 419 | 420 | 421 | 422 | 423 | 424 | 425 | 426 | 427 | 428 | 429 | 430 | 431 | 432 | 433 | 434 | 435 | 436 | 437 | 438 | 439 | 440 | 441 | 442 | 443 | 444 | 445 | 446 | 447 | 448 | 449 | 450 | 451 | 452 | 453 | 454 | 455 | 456 | 457 | 458 | 459 | 460 | 461 | 462 | 463 | 464 | 465 | 466 | 467 | 468 | 469 | 470 | 471 | 472 | 473 | 474 | 475 | 476 | 477 | 478 | 479 | 480 | 481 | 482 | 483 | 484 | 485 | 486 | 487 | 488 | 489 | 490 | 491 | 492 | 493 | 494 | 495 | 496 | 497 | 498 | 499 | 500 | 501 | 502 | 503 | 504 | 505 | 506 | 507 | 508 | 509 | 510 | 511 | 512 | 513 | 514 | 515 | 516 | 517 | 518 | 519 | 520 | 521 | 522 | 523 | 524 | 525 | 526 | 527 | 528 | 529 | 530 | 531 | 532 | 533 | 534 | 535 | 536 | 537 | 538 | 539 | 540 | 541 | 542 | 543 | 544 | 545 | 546 | 547 | 548 | 549 | 550 | 551 | 552 | 553 | 554 | 555 | 556 | 557 | 558 | 559 | 560 | 561 | 562 | 563 | 564 | 565 | 566 | 567 | 568 | 569 | 570 | 571 | 572 | 573 | 574 | 575 | 576 | 577 | 578 | 579 | 580 | 581 | 582 | 583 | 584 | 585 | 586 | 587 | 588 | 589 | 590 | 591 | 592 | 593 | 594 | 595 | 596 | 597 | 598 | 599 | 600 | 601 | 602 | 603 | 604 | 605 | 606 | 607 | 608 | 609 | 610 | 611 | 612 | 613 | 614 | 615 | 616 | 617 | 618 | 619 | 620 | 621 | 622 | 623 | 624 | 625 | 626 | 627 | 628 | 629 | 630 | 631 | 632 | 633 | 634 | 635 | 636 | 637 | 638 | 639 | 640 | 641 | 642 | 643 | 644 | 645 | 646 | 647 | 648 | 649 | 650 | 651 | 652 | 653 | 654 | 655 | 656 | 657 | 658 | 659 | 660 | 661 | 662 | 663 | 664 | 665 | 666 | 667 | 668 | 669 | 670 | 671 | 672 | 673 | 674 | 675 | 676 | 677 | 678 | 679 | 680 | 681 | 682 | 683 | 684 | 685 | 686 | 687 | 688 | 689 | 690 | 691 | 692 | 693 | 694 | 695 | 696 | 697 | 698 | 699 | 700 | 701 | 702 | 703 | 704 | 705 | 706 | 707 | 708 | 709 | 710 | 711 | 712 | 713 | 714 | 715 | 716 | 717 | 718 | 719 | 720 | 721 | 722 | 723 | 724 | 725 | 726 | 727 | 728 | 729 | 730 | 731 | 732 | 733 | 734 | 735 | 736 | 737 | 738 | 739 | 740 | 741 | 742 | 743 | 744 | 745 | 746 | 747 | 748 | 749 | 750 | 751 | 752 | 753 | 754 | 755 | 756 | 757 | 758 | 759 | 760 | 761 | 762 | 763 | 764 | 765 | 766 | 767 | 768 | 769 | 770 | 771 | 772 | 773 | 774 | 775 | 776 | 777 | 778 | 779 | 780 | 781 | 782 | 783 | 784 | 785 | 786 | 787 | 788 | 789 | 790 | 791 | 792 | 793 | 794 | 795 | 796 | 797 | 798 | 799 | 800 | 801 | 802 | 803 | 804 | 805 | 806 | 807 | 808 | 809 | 810 | 811 | 812 | 813 | 814 | 815 | 816 | 817 | 818 | 819 | 820 | 821 | 822 | 823 | 824 | 825 | 826 | 827 | 828 | 829 | 830 | 831 | 832 | 833 | 834 | 835 | 836 | 837 | 838 | 839 | 840 | 841 | 842 | 843 | 844 | 845 | 846 | 847 | 848 | 849 | 850 | 851 | 852 | 853 | 854 | 855 | 856 | 857 | 858 | 859 | 860 | 861 | 862 | 863 | 864 | 865 | 866 | 867 | 868 | 869 | 870 | 871 | 872 | 873 | 874 | 875 | 876 | 877 | 878 | 879 | 880 | 881 | 882 | 883 | 884 | 885 | 886 | 887 | 888 | 889 | 890 | 891 | 892 | 893 | 894 | 895 | 896 | 897 | 898 | 899 | 900 | 901 | 902 | 903 | 904 | 905 | 906 | 907 | 908 | 909 | 910 | 911 | 912 | 913 | 914 | 915 | 916 | 917 | 918 | 919 | 920 | 921 | 922 | 923 | 924 | 925 | 926 | 927 | 928 | 929 | 930 | 931 | 932 | 933 | 934 | 935 | 936 | 937 | 938 | 939 | 940 | 941 | 942 | 943 | 944 | 945 | 946 | 947 | 948 | 949 | 950 | 951 | 952 | 953 | 954 | 955 | 956 | 957 | 958 | 959 | 960 | 961 | 962 | 963 | 964 | 965 | 966 | 967 | 968 | 969 | 970 | 971 | 972 | 973 | 974 | 975 | 976 | 977 | 978 | 979 | 980 | 981 | 982 | 983 | 984 | 985 | 986 | 987 | 988 | 989 | 990 | 991 | 992 | 993 | 994 | 995 | 996 | 997 | 998 | 999 | 1000 |
|---|---|---|---|---|---|---|---|---|----|----|----|----|----|----|----|----|----|----|----|----|----|----|----|----|----|----|----|----|----|----|----|----|----|----|----|----|----|----|----|----|----|----|----|----|----|----|----|----|----|----|----|----|----|----|----|----|----|----|----|----|----|----|----|----|----|----|----|----|----|----|----|----|----|----|----|----|----|----|----|----|----|----|----|----|----|----|----|----|----|----|----|----|----|----|----|----|----|----|-----|-----|-----|-----|-----|-----|-----|-----|-----|-----|-----|-----|-----|-----|-----|-----|-----|-----|-----|-----|-----|-----|-----|-----|-----|-----|-----|-----|-----|-----|-----|-----|-----|-----|-----|-----|-----|-----|-----|-----|-----|-----|-----|-----|-----|-----|-----|-----|-----|-----|-----|-----|-----|-----|-----|-----|-----|-----|-----|-----|-----|-----|-----|-----|-----|-----|-----|-----|-----|-----|-----|-----|-----|-----|-----|-----|-----|-----|-----|-----|-----|-----|-----|-----|-----|-----|-----|-----|-----|-----|-----|-----|-----|-----|-----|-----|-----|-----|-----|-----|-----|-----|-----|-----|-----|-----|-----|-----|-----|-----|-----|-----|-----|-----|-----|-----|-----|-----|-----|-----|-----|-----|-----|-----|-----|-----|-----|-----|-----|-----|-----|-----|-----|-----|-----|-----|-----|-----|-----|-----|-----|-----|-----|-----|-----|-----|-----|-----|-----|-----|-----|-----|-----|-----|-----|-----|-----|-----|-----|-----|-----|-----|-----|-----|-----|-----|-----|-----|-----|-----|-----|-----|-----|-----|-----|-----|-----|-----|-----|-----|-----|-----|-----|-----|-----|-----|-----|-----|-----|-----|-----|-----|-----|-----|-----|-----|-----|-----|-----|-----|-----|-----|-----|-----|-----|-----|-----|-----|-----|-----|-----|-----|-----|-----|-----|-----|-----|-----|-----|-----|-----|-----|-----|-----|-----|-----|-----|-----|-----|-----|-----|-----|-----|-----|-----|-----|-----|-----|-----|-----|-----|-----|-----|-----|-----|-----|-----|-----|-----|-----|-----|-----|-----|-----|-----|-----|-----|-----|-----|-----|-----|-----|-----|-----|-----|-----|-----|-----|-----|-----|-----|-----|-----|-----|-----|-----|-----|-----|-----|-----|-----|-----|-----|-----|-----|-----|-----|-----|-----|-----|-----|-----|-----|-----|-----|-----|-----|-----|-----|-----|-----|-----|-----|-----|-----|-----|-----|-----|-----|-----|-----|-----|-----|-----|-----|-----|-----|-----|-----|-----|-----|-----|-----|-----|-----|-----|-----|-----|-----|-----|-----|-----|-----|-----|-----|-----|-----|-----|-----|-----|-----|-----|-----|-----|-----|-----|-----|-----|-----|-----|-----|-----|-----|-----|-----|-----|-----|-----|-----|-----|-----|-----|-----|-----|-----|-----|-----|-----|-----|-----|-----|-----|-----|-----|-----|-----|-----|-----|-----|-----|-----|-----|-----|-----|-----|-----|-----|-----|-----|-----|-----|-----|-----|-----|-----|-----|-----|-----|-----|-----|-----|-----|-----|-----|-----|-----|-----|-----|-----|-----|-----|-----|-----|-----|-----|-----|-----|-----|-----|-----|-----|-----|-----|-----|-----|-----|-----|-----|-----|-----|-----|-----|-----|-----|-----|-----|-----|-----|-----|-----|-----|-----|-----|-----|-----|-----|-----|-----|-----|-----|-----|-----|-----|-----|-----|-----|-----|-----|-----|-----|-----|-----|-----|-----|-----|-----|-----|-----|-----|-----|-----|-----|-----|-----|-----|-----|-----|-----|-----|-----|-----|-----|-----|-----|-----|-----|-----|-----|-----|-----|-----|-----|-----|-----|-----|-----|-----|-----|-----|-----|-----|-----|-----|-----|-----|-----|-----|-----|-----|-----|-----|-----|-----|-----|-----|-----|-----|-----|-----|-----|-----|-----|-----|-----|-----|-----|-----|-----|-----|-----|-----|-----|-----|-----|-----|-----|-----|-----|-----|-----|-----|-----|-----|-----|-----|-----|-----|-----|-----|-----|-----|-----|-----|-----|-----|-----|-----|-----|-----|-----|-----|-----|-----|-----|-----|-----|-----|-----|-----|-----|-----|-----|-----|-----|-----|-----|-----|-----|-----|-----|-----|-----|-----|-----|-----|-----|-----|-----|-----|-----|-----|-----|-----|-----|-----|-----|-----|-----|-----|-----|-----|-----|-----|-----|-----|-----|-----|-----|-----|-----|-----|-----|-----|-----|-----|-----|-----|-----|-----|-----|-----|-----|-----|-----|-----|-----|-----|-----|-----|-----|-----|-----|-----|-----|-----|-----|-----|-----|-----|-----|-----|-----|-----|-----|-----|-----|-----|-----|-----|-----|-----|-----|-----|-----|-----|-----|-----|-----|-----|-----|-----|-----|-----|-----|-----|-----|-----|-----|-----|-----|-----|-----|-----|-----|-----|-----|-----|-----|-----|-----|-----|-----|-----|-----|-----|-----|-----|-----|-----|-----|-----|-----|-----|-----|-----|-----|-----|-----|-----|-----|-----|-----|-----|-----|-----|-----|-----|-----|-----|-----|-----|-----|-----|-----|-----|-----|-----|-----|-----|-----|-----|-----|-----|-----|-----|-----|-----|-----|-----|-----|-----|-----|-----|-----|-----|-----|-----|-----|-----|-----|-----|-----|-----|-----|-----|-----|-----|-----|-----|-----|-----|-----|-----|-----|-----|-----|-----|-----|-----|-----|-----|-----|-----|-----|-----|-----|-----|-----|-----|-----|-----|-----|-----|-----|-----|-----|-----|-----|-----|-----|-----|-----|-----|-----|-----|-----|-----|-----|-----|-----|-----|-----|-----|-----|-----|-----|-----|-----|-----|-----|-----|-----|-----|-----|-----|-----|-----|-----|-----|-----|-----|-----|-----|-----|-----|-----|-----|-----|-----|-----|-----|-----|-----|-----|-----|-----|-----|-----|-----|-----|-----|-----|-----|-----|-----|-----|-----|-----|-----|-----|-----|-----|-----|-----|-----|-----|-----|-----|-----|-----|-----|-----|-----|-----|-----|-----|-----|-----|-----|-----|-----|-----|-----|-----|-----|-----|-----|-----|-----|-----|-----|-----|-----|-----|-----|-----|-----|-----|-----|-----|-----|-----|-----|-----|-----|-----|-----|-----|-----|-----|-----|-----|-----|-----|-----|-----|-----|-----|-----|-----|------|







A large grid of colored squares, primarily green and red, with some yellow and orange squares. The grid is composed of many small squares, each representing a data point. The colors are distributed across the grid, with a higher concentration of red squares in the upper right and lower right areas, and a higher concentration of green squares in the upper left and lower left areas. The overall pattern suggests a spatial distribution of data, possibly representing a city grid or a map of a region.



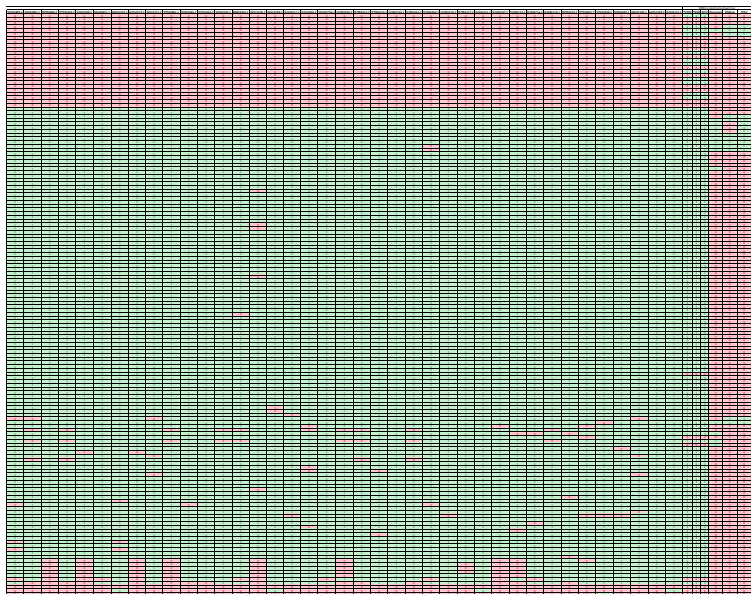



### CD8 DENV-2 Epitopes

|        |             |              |       |      |             |      |                |                   |                     |                     | NCBI IDs of DENV-2 circulating strains from Thailand. (100% identity in green; else, 0, red) |            |            |            |            |            |            |            |            |            | DENV-2 constructs of vaccines |            |            |       |      |     |           |        |      |
|--------|-------------|--------------|-------|------|-------------|------|----------------|-------------------|---------------------|---------------------|----------------------------------------------------------------------------------------------|------------|------------|------------|------------|------------|------------|------------|------------|------------|-------------------------------|------------|------------|-------|------|-----|-----------|--------|------|
| ID     | AA_Seq      | Protein_Name | Start | End  | Allele      | step | Serotype       | Method/Technique  | Assay_Group         | Qualitative_Measure | ANCS7599.1                                                                                   | QXY23100.1 | QXY23099.1 | BG631508.1 | QBK46950.1 | ANCS7598.1 | BG631503.1 | BG631505.1 | QF519150.1 | Q8A29681.1 | QXY23103.1                    | BG631506.1 | BG631507.1 | TV003 | TDEn | DPV | Dengvaxia | DENVax | TVDV |
| 185104 | NRRRRTAGP   | C            | 96    | 104  | HLA-B*08:01 | 0%   | Dengue virus 2 | ELISPOT           | IFN-g release       | Positive            |                                                                                              | 0          | 0          | 0          | 0          | 0          | 0          | 0          | 0          | 0          | 0                             | 0          | 0          | 0     | 0    | 0   | 0         | 0      | 0    |
| 185399 | RKARSTPF    | C            | 5     | 13   | HLA-B*08:01 | 0%   | Dengue virus 2 | ELISPOT           | IFN-g release       | Positive            |                                                                                              |            |            |            |            |            |            |            |            |            |                               |            |            |       |      |     |           |        |      |
| 186264 | VGRQEKGSLS  | PreM         | 128   | 137  | HLA-B*08:01 | 0%   | Dengue virus 2 | ELISPOT           | IFN-g release       | Positive            |                                                                                              |            |            |            |            |            |            |            |            |            |                               |            |            |       |      |     |           |        |      |
| 184300 | LATLRKCY    | C            | 53    | 61   | HLA-B*08:01 | 0%   | Dengue virus 2 | ELISPOT           | IFN-g release       | Positive            |                                                                                              |            |            |            |            |            |            |            |            |            |                               |            |            |       |      |     |           |        |      |
| 184467 | LQMEDKAWL   | E            | 478   | 487  | HLA-B*08:01 | 0%   | Dengue virus 2 | ELISPOT           | IFN-g release       | Positive            |                                                                                              |            |            |            |            |            |            |            |            |            |                               |            |            |       |      |     |           |        |      |
| 150448 | MMATIGIAL   | NS2a         | 1229  | 1237 | HLA-B*35:01 | 0%   | Dengue virus 2 | ELISPOT           | IFN-g release       | Positive            |                                                                                              |            |            |            |            |            |            |            |            |            |                               |            |            |       |      |     |           |        |      |
| 150449 | MMATIGIAL   | NS2a         | 1229  | 1238 | HLA-A*02:01 | 0%   | Dengue virus 2 | ELISPOT           | IFN-g release       | Positive            |                                                                                              |            |            |            |            |            |            |            |            |            |                               |            |            |       |      |     |           |        |      |
| 182687 | AYRIKGRGIL  | NS3          | 1497  | 1506 | HLA-B*08:01 | 0%   | Dengue virus 2 | ELISPOT           | IFN-g release       | Positive            |                                                                                              |            |            |            |            |            |            |            |            |            |                               |            |            |       |      |     |           |        |      |
| 182892 | EENMEVEIV   | NS3          | 2049  | 2057 | HLA-B*44:02 | 0%   | Dengue virus 2 | ELISPOT           | IFN-g release       | Positive            |                                                                                              |            |            |            |            |            |            |            |            |            |                               |            |            |       |      |     |           |        |      |
| 184318 | LEEMMEVEIV  | NS3          | 2048  | 2057 | HLA-B*44:02 | 0%   | Dengue virus 2 | ELISPOT           | IFN-g release       | Positive            |                                                                                              |            |            |            |            |            |            |            |            |            |                               |            |            |       |      |     |           |        |      |
| 186211 | VGRQVYVNSL  | NS3          | 1615  | 1624 | HLA-B*08:01 | 0%   | Dengue virus 2 | ELISPOT           | IFN-g release       | Positive            |                                                                                              |            |            |            |            |            |            |            |            |            |                               |            |            |       |      |     |           |        |      |
| 186301 | VLMMRGKRI   | NS3          | 1532  | 1540 | HLA-B*08:01 | 0%   | Dengue virus 2 | ELISPOT           | IFN-g release       | Positive            |                                                                                              |            |            |            |            |            |            |            |            |            |                               |            |            |       |      |     |           |        |      |
| 22816  | GTSGSPIADK  | NS3          | 1608  | 1617 | HLA-A*11:01 | 0%   | Dengue virus 2 | multimer/tetramer | qualitative binding | Positive            |                                                                                              |            |            |            |            |            |            |            |            |            |                               |            |            |       |      |     |           |        |      |
| 22817  | GTSGSPIADKK | NS3          | 1608  | 1618 | HLA-A11     | 0%   | Dengue virus 2 | ELISPOT           | IFN-g release       | Positive            |                                                                                              |            |            |            |            |            |            |            |            |            |                               |            |            |       |      |     |           |        |      |
| 22824  | GTSGSPIVDK  | NS3          | 1608  | 1617 | HLA-A*11:01 | 0%   | Dengue virus 2 | 51 chromium       | cytotoxicity        | Positive            |                                                                                              |            |            |            |            |            |            |            |            |            |                               |            |            |       |      |     |           |        |      |
| 46575  | NYADRWKCF   | NS3          | 2031  | 2039 | HLA-A24     | 0%   | Dengue virus 2 | 51 chromium       | cytotoxicity        | Positive            |                                                                                              |            |            |            |            |            |            |            |            |            |                               |            |            |       |      |     |           |        |      |
| 65548  | TFEGIPSL    | NS3          | 1975  | 1983 | HLA-B35     | 0%   | Dengue virus 2 | 51 chromium       | cytotoxicity        | Positive            |                                                                                              |            |            |            |            |            |            |            |            |            |                               |            |            |       |      |     |           |        |      |
| 32039  | KPWIDPIMV   | NS5          | 2821  | 2829 | HLA-B*55:02 | 0%   | Dengue virus 2 | 51 chromium       | cytotoxicity        | Positive            |                                                                                              |            |            |            |            |            |            |            |            |            |                               |            |            |       |      |     |           |        |      |
| 32941  | KPWIDPLMV   | NS5          | 2821  | 2829 | HLA class I | 0%   | Dengue virus 2 | 51 chromium       | cytotoxicity        | Positive            |                                                                                              |            |            |            |            |            |            |            |            |            |                               |            |            |       |      |     |           |        |      |
| 27083  | ILGDTAWDFG  | E            | 96    | 105  | HLA class I | 100% | Dengue virus 2 | ELISPOT           | IFN-g release       | Positive            | 1                                                                                            | 1          | 1          | 1          | 1          | 1          | 1          | 1          | 1          | 1          | 1                             | 1          | 1          | 1     | 1    | 1   | 1         | 1      | 1    |
| 19223  | GEDGCWYGM   | NS1          | 1100  | 1108 | HLA-B*40:01 | 100% | Dengue virus 2 | ELISPOT           | IFN-g release       | Positive            | 1                                                                                            | 1          | 1          |            |            |            |            |            |            |            |                               |            |            |       |      |     |           |        |      |







|        |                  |      |      |      |             |             |                |                   |                     |              |   |   |   |   |   |   |   |   |   |   |   |   |   |   |   |   |   |   |   |   |   |
|--------|------------------|------|------|------|-------------|-------------|----------------|-------------------|---------------------|--------------|---|---|---|---|---|---|---|---|---|---|---|---|---|---|---|---|---|---|---|---|---|
| 185931 | TKQTGSASSM       | NSS  | 2802 | 2811 | HLA-B*08:01 | 81% - <100% | Dengue virus 2 | ELISPOT           | IFNg release        | Positive     | 1 | 1 | 1 | 1 | 1 | 1 | 1 | 1 | 1 | 0 | 1 | 1 | 1 | 1 | 0 | 1 | 1 | 0 | 1 | 0 |   |
| 539436 | ISGDGDCVVKPLDRFA | NSS  | 3151 | 3166 | HLA class I | 81% - <100% | Dengue virus 2 | ICS               | IFNg release        | Positive     | 1 | 1 | 1 | 1 | 1 | 1 | 1 | 1 | 1 | 0 | 1 | 1 | 1 | 1 | 0 | 1 | 1 | 0 | 1 | 0 |   |
| 69671  | VLNPNYMPSV       | NSS  | 2673 | 2681 | HLA-A*02:01 | 81% - <100% | Dengue virus 2 | ELISPOT           | IFNg release        | Positive     | 1 | 1 | 1 | 1 | 1 | 1 | 1 | 1 | 1 | 0 | 1 | 1 | 1 | 1 | 0 | 1 | 1 | 0 | 1 | 0 |   |
| 73428  | YQZMWSLSMY       | NSS  | 3249 | 3257 | HLA-B*15:01 | 81% - <100% | Dengue virus 2 | ELISPOT           | IFNg release        | Positive     | 1 | 1 | 1 | 1 | 1 | 1 | 1 | 1 | 1 | 0 | 1 | 1 | 1 | 1 | 0 | 1 | 1 | 0 | 1 | 0 |   |
| 74305  | HLSDVSK          | NSS  | 517  | 525  | HLA class I | 81% - <100% | Dengue virus 2 | ELISPOT           | IFNg release        | Positive     | 1 | 1 | 1 | 1 | 1 | 1 | 1 | 1 | 1 | 0 | 1 | 1 | 1 | 1 | 0 | 1 | 1 | 0 | 1 | 0 |   |
| 150224 | FTMAAILY         | PreM | 247  | 256  | HLA-B*35:01 | 51%-80%     | Dengue virus 2 | ELISPOT           | IFNg release        | Positive     | 1 | 1 | 1 | 1 | 0 | 1 | 1 | 1 | 1 | 0 | 0 | 1 | 1 | 1 | 1 | 1 | 1 | 0 | 1 | 0 |   |
| 150299 | ILLTAVAPSM       | PreM | 270  | 279  | HLA-B*08:01 | 51%-80%     | Dengue virus 2 | ELISPOT           | IFNg release        | Positive     | 1 | 1 | 1 | 1 | 1 | 0 | 0 | 1 | 1 | 0 | 1 | 1 | 1 | 1 | 1 | 1 | 1 | 1 | 0 | 1 |   |
| 150571 | SLFKTEGV         | PreM | 136  | 145  | HLA-A*02:01 | 51%-80%     | Dengue virus 2 | ELISPOT           | IFNg release        | Positive     | 1 | 0 | 1 | 0 | 1 | 0 | 1 | 0 | 1 | 0 | 1 | 0 | 1 | 1 | 1 | 1 | 1 | 1 | 1 | 1 |   |
| 180588 | LYLTIGTHF        | PreM | 254  | 263  | HLA-B*35:01 | 51%-80%     | Dengue virus 2 | ELISPOT           | IFNg release        | Positive     | 1 | 0 | 1 | 0 | 1 | 0 | 1 | 1 | 0 | 1 | 0 | 1 | 1 | 1 | 1 | 1 | 1 | 1 | 1 | 1 |   |
| 180433 | EPGGLKLNWF       | E    | 663  | 672  | HLA-B*35:01 | 51%-80%     | Dengue virus 2 | ELISPOT           | IFNg release        | Positive     | 1 | 0 | 1 | 0 | 1 | 0 | 1 | 1 | 0 | 1 | 0 | 1 | 0 | 1 | 0 | 1 | 1 | 1 | 1 | 1 |   |
| 180563 | KILGVITWIGMNS    | E    | 456  | 470  | HLA class I | 51%-80%     | Dengue virus 2 | ICS               | IFNg release        | Positive     | 1 | 0 | 1 | 0 | 1 | 0 | 1 | 1 | 0 | 1 | 0 | 1 | 0 | 1 | 1 | 1 | 1 | 1 | 1 | 1 |   |
| 182846 | EAKQPATLR        | E    | 329  | 337  | HLA-A*08:01 | 51%-80%     | Dengue virus 2 | ELISPOT           | IFNg release        | Positive     | 1 | 0 | 1 | 0 | 1 | 0 | 1 | 1 | 0 | 1 | 0 | 1 | 1 | 1 | 1 | 1 | 1 | 1 | 1 | 1 |   |
| 183747 | ILIGVITW         | E    | 737  | 745  | HLA-B*08:01 | 51%-80%     | Dengue virus 2 | ELISPOT           | IFNg release        | Positive     | 1 | 0 | 1 | 0 | 1 | 0 | 1 | 1 | 0 | 1 | 0 | 1 | 1 | 1 | 1 | 1 | 1 | 1 | 1 | 1 |   |
| 150259 | GPWHLCKLEM       | NS1  | 1041 | 1050 | HLA-B*35:01 | 51%-80%     | Dengue virus 2 | ELISPOT           | IFNg release        | Positive     | 1 | 0 | 1 | 0 | 1 | 0 | 1 | 1 | 0 | 1 | 0 | 1 | 1 | 1 | 1 | 1 | 1 | 0 | 1 | 0 |   |
| 186474 | WKTWGWAKML       | NS1  | 890  | 899  | HLA-B*08:01 | 51%-80%     | Dengue virus 2 | ELISPOT           | IFNg release        | Positive     | 1 | 0 | 1 | 0 | 1 | 0 | 1 | 1 | 0 | 1 | 0 | 1 | 0 | 1 | 1 | 1 | 1 | 1 | 1 | 1 |   |
| 150741 | YQLAVTMA         | NS2a | 1157 | 1165 | HLA-A*02:01 | 51%-80%     | Dengue virus 2 | ELISPOT           | IFNg release        | Positive     | 1 | 1 | 0 | 1 | 1 | 1 | 0 | 1 | 0 | 1 | 1 | 1 | 1 | 1 | 1 | 1 | 1 | 0 | 1 | 0 |   |
| 183741 | ILCVPNAIL        | NS2a | 1279 | 1288 | HLA-B*08:01 | 51%-80%     | Dengue virus 2 | ELISPOT           | IFNg release        | Positive     | 0 | 1 | 0 | 1 | 1 | 1 | 1 | 0 | 0 | 1 | 1 | 1 | 0 | 1 | 0 | 1 | 1 | 1 | 1 | 1 |   |
| 150346 | KTFDSEVVK        | NS3  | 1863 | 1871 | HLA-A*11:01 | 51%-80%     | Dengue virus 2 | multimer/tetramer | qualitative binding | Positive     | 1 | 0 | 1 | 0 | 1 | 0 | 1 | 1 | 0 | 1 | 0 | 1 | 0 | 1 | 1 | 1 | 1 | 0 | 1 | 0 |   |
| 17802  | FSPGTSGSPIDKKG   | NS3  | 130  | 144  | HLA class I | 51%-80%     | Dengue virus 2 | ELISPOT           | IFNg release        | Positive     | 1 | 0 | 1 | 0 | 1 | 0 | 1 | 1 | 0 | 1 | 0 | 1 | 0 | 0 | 1 | 1 | 1 | 0 | 1 | 0 |   |
| 180623 | LPVWLAKVY        | NS3  | 2017 | 2025 | HLA-B*15:01 | 51%-80%     | Dengue virus 2 | ELISPOT           | IFNg release        | Positive     | 1 | 0 | 1 | 0 | 0 | 1 | 1 | 1 | 0 | 1 | 0 | 1 | 0 | 0 | 1 | 1 | 0 | 0 | 0 | 0 |   |
| 180624 | LPVWLAKVYA       | NS3  | 2017 | 2026 | HLA-B*35:01 | 51%-80%     | Dengue virus 2 | ELISPOT           | IFNg release        | Positive     | 1 | 0 | 1 | 0 | 0 | 1 | 1 | 1 | 0 | 1 | 0 | 1 | 0 | 1 | 1 | 1 | 0 | 0 | 0 | 0 |   |
| 180750 | SPGTSGSPIDKKGK   | NS3  | 131  | 145  | HLA-A*11:01 | 51%-80%     | Dengue virus 2 | ELISPOT           | IFNg release        | Positive     | 1 | 0 | 1 | 0 | 1 | 0 | 1 | 1 | 0 | 1 | 0 | 1 | 0 | 0 | 1 | 1 | 1 | 1 | 1 | 1 |   |
| 185388 | RIKQKILGY        | NS3  | 1499 | 1508 | HLA-B*15:01 | 51%-80%     | Dengue virus 2 | ELISPOT           | IFNg release        | Positive     | 0 | 1 | 1 | 1 | 1 | 1 | 1 | 1 | 0 | 1 | 1 | 1 | 1 | 1 | 1 | 1 | 1 | 0 | 1 | 0 |   |
| 22818  | GTSGSPIDK        | NS3  | 133  | 142  | HLA-A*11:01 | 51%-80%     | Dengue virus 2 | ELISPOT           | IFNg release        | Positive     | 1 | 0 | 1 | 0 | 1 | 0 | 1 | 1 | 0 | 1 | 0 | 0 | 1 | 1 | 1 | 1 | 1 | 0 | 1 | 0 |   |
| 22819  | GTSGSPIDKX       | NS3  | 133  | 143  | HLA-A11     | 51%-80%     | Dengue virus 2 | 51 chromium       | cytotoxicity        | Positive     | 1 | 0 | 1 | 0 | 1 | 0 | 1 | 1 | 0 | 1 | 0 | 1 | 0 | 1 | 1 | 1 | 1 | 0 | 1 | 0 |   |
| 54176  | RIKQKIL          | NS3  | 1499 | 1506 | HLA-B8      | 51%-80%     | Dengue virus 2 | ELISPOT           | IFNg release        | Positive     | 0 | 1 | 1 | 1 | 1 | 1 | 1 | 1 | 0 | 0 | 1 | 1 | 1 | 1 | 1 | 1 | 1 | 0 | 1 | 0 |   |
| 150377 | LLLVAVTAY        | NS4b | 2355 | 2363 | HLA-A*02:01 | 51%-80%     | Dengue virus 2 | ELISPOT           | IFNg release        | Positive     | 0 | 1 | 1 | 1 | 1 | 0 | 1 | 1 | 1 | 1 | 1 | 1 | 1 | 0 | 1 | 0 | 0 | 0 | 0 | 0 |   |
| 150639 | RLVAVATPV        | NS4b | 2382 | 2391 | HLA-A*02:01 | 51%-80%     | Dengue virus 2 | ELISPOT           | IFNg release        | Positive     | 1 | 0 | 1 | 0 | 1 | 0 | 1 | 1 | 0 | 1 | 0 | 1 | 0 | 1 | 1 | 1 | 1 | 0 | 1 | 0 |   |
| 180794 | YATTVTPM         | NS4b | 2286 | 2294 | HLA-B*35:01 | 51%-80%     | Dengue virus 2 | ELISPOT           | IFNg release        | Positive     | 1 | 0 | 1 | 0 | 1 | 0 | 1 | 1 | 0 | 1 | 0 | 1 | 0 | 1 | 1 | 1 | 1 | 0 | 1 | 0 |   |
| 35568  | LEKTKDL          | NS4b | 2249 | 2256 | HLA-B8      | 51%-80%     | Dengue virus 2 | ELISPOT           | IFNg release        | Positive     | 1 | 0 | 1 | 0 | 1 | 0 | 1 | 1 | 1 | 0 | 1 | 0 | 1 | 0 | 1 | 1 | 1 | 0 | 1 | 0 |   |
| 150554 | RTTWSIAHK        | NSS  | 3283 | 3291 | HLA-A*11:01 | 51%-80%     | Dengue virus 2 | ELISPOT           | IFNg release        | Positive     | 1 | 0 | 1 | 0 | 1 | 0 | 1 | 1 | 0 | 1 | 0 | 1 | 0 | 0 | 1 | 1 | 1 | 0 | 1 | 0 |   |
| 174066 | CGGLKNVREVKLTGG  | NSS  | 2582 | 2598 | HLA-A2      | 51%-80%     | Dengue virus 2 | ICS               | IFNg release        | Positive     | 1 | 0 | 1 | 0 | 1 | 0 | 1 | 1 | 0 | 1 | 0 | 0 | 1 | 1 | 1 | 0 | 1 | 1 | 0 | 1 |   |
| 180500 | HKLLAEAFKLTQYN   | NSS  | 3052 | 3066 | HLA class I | 51%-80%     | Dengue virus 2 | ELISPOT           | IFNg release        | Positive     | 1 | 0 | 1 | 0 | 1 | 1 | 1 | 1 | 0 | 1 | 0 | 1 | 0 | 0 | 1 | 1 | 1 | 0 | 1 | 0 |   |
| 180582 | KTWAYHGSYETQGT   | NSS  | 2792 | 2806 | HLA class I | 51%-80%     | Dengue virus 2 | ICS               | IFNg release        | Positive     | 0 | 1 | 0 | 1 | 1 | 1 | 1 | 0 | 0 | 1 | 0 | 1 | 0 | 1 | 1 | 1 | 1 | 0 | 1 | 0 |   |
| 180758 | SWHYODDHPKYTWAY  | NSS  | 291  | 305  | HLA class I | 51%-80%     | Dengue virus 2 | ELISPOT           | IFNg release        | Positive     | 0 | 1 | 0 | 1 | 1 | 1 | 1 | 1 | 0 | 0 | 1 | 0 | 1 | 1 | 1 | 1 | 0 | 1 | 1 | 0 |   |
| 31747  | KLAEZK           | NSS  | 3054 | 3062 | HLA-A*02:01 | 51%-80%     | Dengue virus 2 | ELISPOT           | IFNg release        | Positive Low | 1 | 0 | 1 | 0 | 1 | 0 | 1 | 1 | 1 | 0 | 1 | 0 | 1 | 1 | 1 | 1 | 1 | 0 | 1 | 0 |   |
| 183766 | LNRRRTAG         | C    | 94   | 102  | HLA-B*08:01 | >0% - 50%   | Dengue virus 2 | ELISPOT           | IFNg release        | Positive     | 1 | 0 | 1 | 0 | 1 | 0 | 1 | 0 | 0 | 1 | 0 | 1 | 0 | 1 | 1 | 1 | 0 | 0 | 0 | 0 |   |
| 184518 | LNRRRTAG         | C    | 95   | 103  | HLA-B*08:01 | >0% - 50%   | Dengue virus 2 | ELISPOT           | IFNg release        | Positive     | 0 | 1 | 0 | 1 | 0 | 1 | 0 | 1 | 0 | 0 | 1 | 0 | 1 | 0 | 1 | 1 | 1 | 0 | 0 | 0 |   |
| 180818 | WILRHGFTMMMAIL   | PreM | 126  | 140  | HLA class I | >0% - 50%   | Dengue virus 2 | ICS               | IFNg release        | Positive     | 0 | 0 | 0 | 0 | 0 | 1 | 0 | 0 | 0 | 0 | 0 | 0 | 0 | 0 | 0 | 0 | 0 | 1 | 0 | 0 |   |
| 183577 | HFQRALIFL        | PreM | 262  | 271  | HLA-B*08:01 | >0% - 50%   | Dengue virus 2 | ELISPOT           | IFNg release        | Positive     | 0 | 0 | 0 | 0 | 1 | 0 | 0 | 0 | 0 | 0 | 0 | 0 | 1 | 1 | 1 | 1 | 1 | 1 | 1 | 1 |   |
| 183621 | HVGRIETWIL       | PreM | 233  | 242  | HLA-B*08:01 | >0% - 50%   | Dengue virus 2 | ELISPOT           | IFNg release        | Positive     | 0 | 0 | 0 | 0 | 1 | 0 | 0 | 0 | 0 | 0 | 0 | 0 | 0 | 0 | 0 | 0 | 0 | 1 | 0 | 0 |   |
| 183748 | ILIGVITW         | E    | 737  | 745  | HLA-B*08:01 | >0% - 50%   | Dengue virus 2 | ELISPOT           | IFNg release        | Positive     | 0 | 1 | 0 | 0 | 1 | 0 | 1 | 0 | 0 | 0 | 0 | 1 | 0 | 1 | 0 | 0 | 0 | 0 | 0 | 0 | 0 |
| 183781 | IMDLKXPHVL       | E    | 619  | 628  | HLA-B*08:01 | >0% - 50%   | Dengue virus 2 | ELISPOT           | IFNg release        | Positive     | 0 | 1 | 0 | 1 | 1 | 0 | 0 | 0 | 0 | 0 | 1 | 0 | 1 | 1 | 1 | 1 | 1 | 1 | 1 | 1 |   |
| 184327 | LEKRNHGR         | E    | 622  | 631  | HLA-B*08:01 | >0% - 50%   | Dengue virus 2 | ELISPOT           | IFNg release        | Positive     | 0 | 1 | 0 | 1 | 1 | 1 | 0 | 0 | 0 | 0 | 1 | 0 | 1 | 1 | 1 | 1 | 1 | 1 | 1 | 1 |   |
| 184755 | MDLEKPHVL        | E    | 620  | 628  | HLA-B*08:01 | >0% - 50%   | Dengue virus 2 | ELISPOT           | IFNg release        | Positive     | 0 | 1 | 0 | 1 | 1 | 1 | 0 | 0 | 0 | 0 | 0 | 1 | 1 | 1 | 1 | 1 | 1 | 1 | 1 | 1 |   |
| 180450 | FAGPVSDQHY       | NS1  | 1022 | 1031 | HLA-B*35:01 | >0% - 50%   | Dengue virus 2 | ELISPOT           | IFNg release        | Positive     | 0 | 1 | 0 | 0 | 1 | 0 | 1 | 0 | 0 | 0 | 1 | 0 | 1 | 0 | 0 | 1 | 0 | 0 | 0 | 0 |   |
| 180496 | GVFTTNWLKLEKQ    | NS1  | 936  | 950  | HLA class I | >0% - 50%   | Dengue virus 2 | ICS               | IFNg release        | Positive     | 0 | 1 | 0 | 1 | 0 | 0 | 1 | 1 | 0 | 1 | 0 | 1 | 0 | 0 | 1 | 0 | 0 | 1 | 0 | 0 |   |
| 150457 | MTDDIGMGV        | NS2a | 1191 | 1199 | HLA-A*01:01 | >0% - 50%   | Dengue virus 2 | ELISPOT           | IFNg release        | Positive     | 0 | 1 | 0 | 0 | 1 | 1 | 1 | 0 | 0 | 0 | 1 | 0 | 1 | 1 | 1 | 1 | 0 | 1 | 0 | 0 |   |
| 150640 | TMTDDIGMGV       | NS2a | 1176 | 1185 | HLA-A*02:01 | >0% - 50%   | Dengue virus 2 | ELISPOT           | IFNg release        | Positive     | 0 | 1 | 0 | 1 | 0 | 1 | 1 | 1 | 0 | 0 | 0 | 1 | 0 | 1 | 1 | 1 | 1 | 0 | 1 | 0 |   |
| 180671 | MSFRDLGRVM       | NS2a | 1175 | 1184 | HLA-B*35:01 | >0% - 50%   | Dengue virus 2 | ELISPOT           | IFNg release        | Positive     | 0 | 1 | 0 | 1 | 1 | 1 | 1 | 0 | 0 | 0 | 1 | 0 | 0 | 1 | 0 | 1 | 0 | 1 | 0 | 0 |   |
| 180717 | RDLGRVMWVSGTATMT | NS2a | 51   | 65   | HLA class I | >0% - 50%   | Dengue virus 2 | ICS               | IFNg release        | Positive     | 0 | 1 | 0 | 1 | 1 | 1 | 0 | 0 | 0 | 0 | 1 | 0 | 0 | 1 | 0 | 1 | 0 | 1 | 0 | 0 |   |
| 150381 | LVLSGLFPV        | NS2b | 1448 | 1457 | HLA-A*02:01 | >0% - 50%   | Dengue virus 2 | ELISPOT           | IFNg release        | Positive     | 0 | 1 | 0 | 1 | 1 | 1 | 0 | 0 | 0 | 0 | 1 | 0 | 1 | 1 | 1 | 1 | 0 | 1 | 0 | 0 |   |
| 150425 | LVLSGLFPV        | NS2b | 1449 | 1457 | HLA-A*02:01 | >0% - 50%   | Dengue virus 2 | ELISPOT           | IFNg release        | Positive     | 0 | 1 | 0 | 0 | 1 | 1 | 1 | 0 | 0 | 0 | 0 | 1 | 0 | 1 | 1 | 1 | 1 | 0 | 1 | 0 |   |
| 180538 | ISGLFPVSPITAAA   | NS2b | 106  | 120  | HLA class I | >0% - 50%   | Dengue virus 2 | ICS               | IFNg release        | Positive     | 0 | 1 | 0 | 1 | 1 | 1 | 1 | 0 | 0 | 0 | 0 | 1 | 0 | 1 | 1 | 1 | 0 | 1 | 0 | 0 |   |
| 150217 | FPQSNAPIM        | NS3  | 1800 | 1808 | HLA-B*35:01 | >0% - 50%   | Dengue virus 2 | ELISPOT           | IFNg release        | Positive     | 0 | 1 | 0 | 1 | 0 | 1 | 0 | 0 | 0 | 0 | 0 | 1 | 0 | 1 | 0 | 0 |   |   |   |   |   |







The image displays a 100x100 grid representing a 100-year timeline from 1900 to 2099. The grid is color-coded: red for the top row (1900), green for the middle rows (1901-2098), and pink for the bottom row (2099). The leftmost column is labeled with years from 1900 to 2099. The grid is divided into four quadrants by a vertical line at the 50th column and a horizontal line at the 50th row.



**Supplementary Table S7. Alignment of CD4 and CD8 epitopes in circulating dengue viruses from Brazil and six vaccine candidates.** Detailed information, for Brazil, on each of the vaccine carried CD4 and CD8 T cell epitopes that are not present in any of the viral isolates, present in all of the viral isolates, present in only 81% – <100% viral isolates or 51% – 80% viral isolates or in only >0% – 50% of viral isolates for each of the epitope within each of the six vaccine candidates and for all the four dengue serotypes. The first table summarizes information retrieved on circulating viral isolate sequences available from Brazil. Next, the globally reported CD4/CD8 T cell epitopes are organized into: DENV-1 specific CD4 epitopes, DENV-2 specific CD4 epitopes, DENV-3 specific CD4 epitopes, DENV-4 specific CD4 epitopes, DENV-1 specific CD8 epitopes, DENV-2 specific CD8 epitopes, DENV-3 specific CD8 epitopes, DENV-4 specific CD8 epitopes. In each of these tables, identity of the epitope to each of the corresponding viral isolate serotype and each of the vaccine constructs are indicated. Green color shade and number 1 indicates 100% identity in the given virus isolate/vaccine construct. Pink color shade and number zero indicates not identical in the given virus isolate/vaccine construct.



| NCBI ID    | Strain Name              | Host  | Date       | Continent     | Country | Prot_Name   | VirusType      |
|------------|--------------------------|-------|------------|---------------|---------|-------------|----------------|
| ACO06167.1 | DENV-1/BR/BID-V2395/2006 | Human | 2006-01-01 | South America | Brazil  | polyprotein | Dengue virus 1 |
| ACO06161.1 | DENV-1/BR/BID-V2389/2004 | Human | 2004-01-01 | South America | Brazil  | polyprotein | Dengue virus 1 |
| ACO06170.1 | DENV-1/BR/BID-V2398/2007 | Human | 2007-01-01 | South America | Brazil  | polyprotein | Dengue virus 1 |
| AGN94867.1 | 13501/BR-PE/10           | Human | 2010-01-01 | South America | Brazil  | polyprotein | Dengue virus 1 |
| AGN94869.1 | 13861/BR-PE/10           | Human | 2010-01-01 | South America | Brazil  | polyprotein | Dengue virus 1 |
| AKQ00018.1 | DENV1 BR/SJRP/807/2013   | Human | 2013-01-05 | South America | Brazil  | polyprotein | Dengue virus 1 |
| AKQ00012.1 | DENV1 BR/SJRP/354/2011   | Human | 2011-05-24 | South America | Brazil  | polyprotein | Dengue virus 1 |
| AKQ00011.1 | DENV1 BR/SJRP/287/2011   | Human | 2011-05-03 | South America | Brazil  | polyprotein | Dengue virus 1 |
| ACO06173.1 | DENV-1/BR/BID-V2401/2008 | Human | 2008-01-01 | South America | Brazil  | polyprotein | Dengue virus 1 |
| AGN94868.1 | 13671/BR-PE/10           | Human | 2010-01-01 | South America | Brazil  | polyprotein | Dengue virus 1 |
| AGN94865.1 | 9808/BR-PE/10            | Human | 2010-01-01 | South America | Brazil  | polyprotein | Dengue virus 1 |
| AGN94870.1 | 14985/BR-PE/10           | Human | 2010-01-01 | South America | Brazil  | polyprotein | Dengue virus 1 |
| AKQ00039.1 | BR/SJRP/2271/2014        | Human | 2014-02-10 | South America | Brazil  | polyprotein | Dengue virus 1 |
| AKQ00038.1 | BR/SJRP/1107/2013        | Human | 2013-02-26 | South America | Brazil  | polyprotein | Dengue virus 1 |
| QOW96373.1 | USP-CB-54                | Human | 2018-11-18 | South America | Brazil  | polyprotein | Dengue virus 1 |
| AKQ00016.1 | BR/SJRP/709/2013         | Human | 2013-10-25 | South America | Brazil  | polyprotein | Dengue virus 1 |
| AKQ00015.1 | DENV1 BR/SJRP/509/2012   | Human | 2012-03-16 | South America | Brazil  | polyprotein | Dengue virus 1 |
| AKQ00013.1 | BR/SJRP/395/2011         | Human | 2011-06-08 | South America | Brazil  | polyprotein | Dengue virus 1 |
| QOW96372.1 | USP-CB-53                | Human | 2018-11-11 | South America | Brazil  | polyprotein | Dengue virus 1 |
| QOW96385.1 | USP-CB-111               | Human | 2019-06-05 | South America | Brazil  | polyprotein | Dengue virus 1 |
| ACO06164.1 | DENV-1/BR/BID-V2392/2005 | Human | 2005-01-01 | South America | Brazil  | polyprotein | Dengue virus 1 |
| ACY70762.1 | DENV-1/BR/BID-V3490/2008 | Human | 2008-01-01 | South America | Brazil  | polyprotein | Dengue virus 1 |
| AGN94866.1 | 12898/BR-PE/10           | Human | 2010-01-01 | South America | Brazil  | polyprotein | Dengue virus 1 |
| AKQ00014.1 | DENV1 BR/SJRP/484/2012   | Human | 2012-02-13 | South America | Brazil  | polyprotein | Dengue virus 1 |
| AKQ00010.1 | DENV1 BR/SJRP/17/2010    | Human | 2010-10-13 | South America | Brazil  | polyprotein | Dengue virus 1 |
| ACY70783.1 | DENV-2/BR/BID-V3650/2008 | Human | 2008-01-01 | South America | Brazil  | polyprotein | Dengue virus 2 |
| ACW82875.1 | DENV-2/BR/BID-V3486/2008 | Human | 2008-01-01 | South America | Brazil  | polyprotein | Dengue virus 2 |
| ACO06162.1 | DENV-2/BR/BID-V2390/2004 | Human | 2004-01-01 | South America | Brazil  | polyprotein | Dengue virus 2 |
| ACS32031.1 | DENV-2/BR/BID-V2402/2008 | Human | 2008-01-01 | South America | Brazil  | polyprotein | Dengue virus 2 |
| ACO06171.1 | DENV-2/BR/BID-V2399/2007 | Human | 2007-01-01 | South America | Brazil  | polyprotein | Dengue virus 2 |
| ACY70780.1 | DENV-2/BR/BID-V3644/2008 | Human | 2008-01-01 | South America | Brazil  | polyprotein | Dengue virus 2 |
| ADI80655.1 | DENV-2/BR/BID-V3637/2008 | Human | 2008-01-01 | South America | Brazil  | polyprotein | Dengue virus 2 |
| AGK36290.1 | ACS46_II                 | Human | 2010-03-01 | South America | Brazil  | polyprotein | Dengue virus 2 |



|            |                          |         |            |               |        |             |                |
|------------|--------------------------|---------|------------|---------------|--------|-------------|----------------|
| AGK36292.1 | ACS542                   | Human   | 2010-05-04 | South America | Brazil | polyprotein | Dengue virus 2 |
| AGK36297.1 | DGV106                   | Human   | 2010-04-15 | South America | Brazil | polyprotein | Dengue virus 2 |
| AKQ00025.1 | BR/SJRP/779/2013         | Human   | 2013-02-04 | South America | Brazil | polyprotein | Dengue virus 2 |
| AKQ00022.1 | BR/SJRP/567/2012         | Human   | 2012-10-31 | South America | Brazil | polyprotein | Dengue virus 2 |
| AKQ00021.1 | BR/SJRP/350/2008         | Human   | 2008-06-17 | South America | Brazil | polyprotein | Dengue virus 2 |
| QDZ58871.1 | BD-RP                    | Human   | 2019-01-02 | South America | Brazil | polyprotein | Dengue virus 2 |
| QOW96380.1 | USP-CB-96                | Human   | 2019-04-18 | South America | Brazil | polyprotein | Dengue virus 2 |
| QOW96384.1 | USP-CB-110               | Human   | 2019-05-21 | South America | Brazil | polyprotein | Dengue virus 2 |
| ACO06165.1 | DENV-2/BR/BID-V2393/2005 | Human   | 2005-01-01 | South America | Brazil | polyprotein | Dengue virus 2 |
| AGK36291.1 | ACS538                   | Human   | 2010-04-12 | South America | Brazil | polyprotein | Dengue virus 2 |
| AGK36294.1 | ACS721                   | Human   | 2010-05-04 | South America | Brazil | polyprotein | Dengue virus 2 |
| AGN94882.1 | 19190/BR-PE/10           | Human   | 2010-01-01 | South America | Brazil | polyprotein | Dengue virus 2 |
| AKQ00027.1 | BR/SJRP/869/2013         | Human   | 2013-02-08 | South America | Brazil | polyprotein | Dengue virus 2 |
| AKQ00040.1 | BR/SJRP/2298/2014        | Human   | 2014-04-03 | South America | Brazil | polyprotein | Dengue virus 2 |
| QOW96379.1 | USP-CB-95                | Human   | 2019-04-09 | South America | Brazil | polyprotein | Dengue virus 2 |
| QOW96388.1 | USP-CB-121               | Human   | 2019-07-11 | South America | Brazil | polyprotein | Dengue virus 2 |
| ACO06168.1 | DENV-2/BR/BID-V2396/2006 | Human   | 2006-01-01 | South America | Brazil | polyprotein | Dengue virus 2 |
| AGK36293.1 | DGV37                    | Human   | 2010-02-24 | South America | Brazil | polyprotein | Dengue virus 2 |
| AGN94880.1 | 13858/BR-PE/10           | Human   | 2010-01-01 | South America | Brazil | polyprotein | Dengue virus 2 |
| AGN94881.1 | 14905/BR-PE/10           | Human   | 2010-01-01 | South America | Brazil | polyprotein | Dengue virus 2 |
| AKQ00024.1 | BR/SJRP/615/2013         | Human   | 2013-01-10 | South America | Brazil | polyprotein | Dengue virus 2 |
| AKQ00020.1 | BR/SJRP/327/2006         | Human   | 2006-05-26 | South America | Brazil | polyprotein | Dengue virus 2 |
| QBL56211.1 | BeAr849487               | Unknown | 2017-03-28 | South America | Brazil | polyprotein | Dengue virus 2 |
| AGK36298.1 | DGV69                    | Human   | 2010-03-09 | South America | Brazil | polyprotein | Dengue virus 2 |
| AGN94883.1 | 9479/BR-PE/10            | Human   | 2010-01-01 | South America | Brazil | polyprotein | Dengue virus 2 |
| AKQ00026.1 | BR/SJRP/846/2013         | Human   | 2013-02-07 | South America | Brazil | polyprotein | Dengue virus 2 |
| QTX93212.1 | BR-161                   | Human   | 2004-01-01 | South America | Brazil | polyprotein | Dengue virus 2 |
| ACY70744.1 | DENV-3/BR/BID-V3423/2006 | Human   | 2006-01-01 | South America | Brazil | polyprotein | Dengue virus 3 |
| ACY70765.1 | DENV-3/BR/BID-V3585/2007 | Human   | 2007-01-01 | South America | Brazil | polyprotein | Dengue virus 3 |
| ACY70760.1 | DENV-3/BR/BID-V3469/2007 | Human   | 2007-01-01 | South America | Brazil | polyprotein | Dengue virus 3 |
| ACY70761.1 | DENV-3/BR/BID-V3470/2007 | Human   | 2007-01-01 | South America | Brazil | polyprotein | Dengue virus 3 |
| ACY70767.1 | DENV-3/BR/BID-V3589/2007 | Human   | 2007-01-01 | South America | Brazil | polyprotein | Dengue virus 3 |
| ACY70771.1 | DENV-3/BR/BID-V3597/2007 | Human   | 2007-01-01 | South America | Brazil | polyprotein | Dengue virus 3 |
| ACY70777.1 | DENV-3/BR/BID-V3615/2007 | Human   | 2007-01-01 | South America | Brazil | polyprotein | Dengue virus 3 |



|            |                          |       |            |               |        |             |                |
|------------|--------------------------|-------|------------|---------------|--------|-------------|----------------|
| ACY70764.1 | DENV-3/BR/BID-V3584/2006 | Human | 2006-01-01 | South America | Brazil | polyprotein | Dengue virus 3 |
| ACY70772.1 | DENV-3/BR/BID-V3598/2007 | Human | 2007-01-01 | South America | Brazil | polyprotein | Dengue virus 3 |
| ACY70769.1 | DENV-3/BR/BID-V3591/2007 | Human | 2007-01-01 | South America | Brazil | polyprotein | Dengue virus 3 |
| ACY70768.1 | DENV-3/BR/BID-V3590/2007 | Human | 2007-01-01 | South America | Brazil | polyprotein | Dengue virus 3 |
| ACY70748.1 | DENV-3/BR/BID-V3430/2006 | Human | 2006-01-01 | South America | Brazil | polyprotein | Dengue virus 3 |
| ACY70755.1 | DENV-3/BR/BID-V3456/2006 | Human | 2006-01-01 | South America | Brazil | polyprotein | Dengue virus 3 |
| ACO06166.1 | DENV-3/BR/BID-V2394/2005 | Human | 2005-01-01 | South America | Brazil | polyprotein | Dengue virus 3 |
| AGN94904.1 | 249/BR-PE/05             | Human | 2005-01-01 | South America | Brazil | polyprotein | Dengue virus 3 |
| AGN94907.1 | 314/BR-PE/06             | Human | 2005-01-01 | South America | Brazil | polyprotein | Dengue virus 3 |
| AGN94896.1 | 206/BR-PE/05             | Human | 2005-01-01 | South America | Brazil | polyprotein | Dengue virus 3 |
| AGN94897.1 | 339/BR-PE/05             | Human | 2005-01-01 | South America | Brazil | polyprotein | Dengue virus 3 |
| AFK83756.1 | D3BR/ACN/2007            | Human | 2007-01-01 | South America | Brazil | polyprotein | Dengue virus 3 |
| ACY70773.1 | DENV-3/BR/BID-V3601/2007 | Human | 2007-01-01 | South America | Brazil | polyprotein | Dengue virus 3 |
| ACO06174.1 | DENV-3/BR/BID-V2403/2008 | Human | 2008-01-01 | South America | Brazil | polyprotein | Dengue virus 3 |
| ACY70750.1 | DENV-3/BR/BID-V3435/2006 | Human | 2006-01-01 | South America | Brazil | polyprotein | Dengue virus 3 |
| ACY70774.1 | DENV-3/BR/BID-V3605/2007 | Human | 2007-01-01 | South America | Brazil | polyprotein | Dengue virus 3 |
| AGN94902.1 | 129/BR-PE/04             | Human | 2004-01-01 | South America | Brazil | polyprotein | Dengue virus 3 |
| AGN94899.1 | 145/BR-PE/04             | Human | 2004-01-01 | South America | Brazil | polyprotein | Dengue virus 3 |
| AGN94908.1 | 411/BR-PE/06             | Human | 2006-01-01 | South America | Brazil | polyprotein | Dengue virus 3 |
| AGN94910.1 | 420/BR-PE/06             | Human | 2006-01-01 | South America | Brazil | polyprotein | Dengue virus 3 |
| AFK83755.1 | D3BR/AL95/2009           | Human | 2009-01-01 | South America | Brazil | polyprotein | Dengue virus 3 |
| ACY70770.1 | DENV-3/BR/BID-V3593/2007 | Human | 2007-01-01 | South America | Brazil | polyprotein | Dengue virus 3 |
| ACY70776.1 | DENV-3/BR/BID-V3609/2007 | Human | 2007-01-01 | South America | Brazil | polyprotein | Dengue virus 3 |
| ACW82871.1 | DENV-3/BR/BID-V3444/2006 | Human | 2006-01-01 | South America | Brazil | polyprotein | Dengue virus 3 |
| ACY70757.1 | DENV-3/BR/BID-V3460/2006 | Human | 2006-01-01 | South America | Brazil | polyprotein | Dengue virus 3 |
| ACO06163.1 | DENV-3/BR/BID-V2391/2004 | Human | 2004-01-01 | South America | Brazil | polyprotein | Dengue virus 3 |
| ACW82872.1 | DENV-3/BR/BID-V3463/2006 | Human | 2006-01-01 | South America | Brazil | polyprotein | Dengue virus 3 |
| ACY70756.1 | DENV-3/BR/BID-V3457/2006 | Human | 2006-01-01 | South America | Brazil | polyprotein | Dengue virus 3 |
| ACO06172.1 | DENV-3/BR/BID-V2400/2007 | Human | 2007-01-01 | South America | Brazil | polyprotein | Dengue virus 3 |
| AGN94898.1 | 277/BR-PE/05             | Human | 2005-01-01 | South America | Brazil | polyprotein | Dengue virus 3 |
| AGN94900.1 | 603/BR-PE/06             | Human | 2006-01-01 | South America | Brazil | polyprotein | Dengue virus 3 |
| AGN94903.1 | 161/BR-PE/04             | Human | 2004-01-01 | South America | Brazil | polyprotein | Dengue virus 3 |
| ACO06169.1 | DENV-3/BR/BID-V2397/2006 | Human | 2006-01-01 | South America | Brazil | polyprotein | Dengue virus 3 |
| ACY70749.1 | DENV-3/BR/BID-V3434/2006 | Human | 2006-01-01 | South America | Brazil | polyprotein | Dengue virus 3 |



|            |                              |         |            |               |        |                       |                |
|------------|------------------------------|---------|------------|---------------|--------|-----------------------|----------------|
| AEV42062.1 | DENV3/BR/D3LIMHO/2006        | Human   | 2006-01-01 | South America | Brazil | polyprotein           | Dengue virus 3 |
| AGN94905.1 | 263/BR-PE/05                 | Human   | 2005-01-01 | South America | Brazil | polyprotein           | Dengue virus 3 |
| AGN94901.1 | 255/BR-PE/05                 | Human   | 2005-01-01 | South America | Brazil | polyprotein           | Dengue virus 3 |
| AFK83754.1 | D3BR/BR8/04                  | Unknown | 2004-01-01 | South America | Brazil | polyprotein           | Dengue virus 3 |
| AEW50183.1 | H772854                      | Human   | 2010-07-21 | South America | Brazil | polyprotein           | Dengue virus 4 |
| AFX65867.1 | H772852                      | Human   | 2010-07-18 | South America | Brazil | polyprotein           | Dengue virus 4 |
| AFX65875.1 | H779652                      | Human   | 2011-01-24 | South America | Brazil | polyprotein           | Dengue virus 4 |
| AFX65870.1 | H775222                      | Human   | 2010-11-10 | South America | Brazil | polyprotein           | Dengue virus 4 |
| AFX65878.1 | H780556                      | Human   | 2011-01-29 | South America | Brazil | polyprotein           | Dengue virus 4 |
| AFX65880.1 | H780571                      | Human   | 2011-01-13 | South America | Brazil | polyprotein           | Dengue virus 4 |
| AFX65879.1 | H780563                      | Human   | 2011-01-29 | South America | Brazil | polyprotein           | Dengue virus 4 |
| AKQ00033.1 | BR/SJRP/580/2012             | Human   | 2012-12-10 | South America | Brazil | polyprotein           | Dengue virus 4 |
| AKQ00035.1 | BR/SJRP/614/2013             | Human   | 2013-01-10 | South America | Brazil | polyprotein           | Dengue virus 4 |
| AIQ84228.1 | DENV-4/MT/BR28_TVP17914/2012 | Human   | 2012-04-19 | South America | Brazil | polyprotein           | Dengue virus 4 |
| AIQ84240.1 | DENV-4/MT/BR48_TVP17934/2012 | Human   | 2012-03-21 | South America | Brazil | polyprotein           | Dengue virus 4 |
| AIQ84244.1 | DENV-4/MT/BR35_TVP17921/2012 | Human   | 2012-03-30 | South America | Brazil | polyprotein           | Dengue virus 4 |
| AIQ84242.1 | DENV-4/MT/BR44_TVP17930/2012 | Human   | 2012-04-05 | South America | Brazil | polyprotein           | Dengue virus 4 |
| AIQ84233.1 | DENV-4/MT/BR76_TVP17953/2012 | Human   | 2012-04-19 | South America | Brazil | polyprotein           | Dengue virus 4 |
| AIQ84223.1 | DENV-4/MT/BR12_TVP17898/2012 | Human   | 2012-03-28 | South America | Brazil | polyprotein           | Dengue virus 4 |
| AFX65872.1 | H778504                      | Human   | 2011-01-11 | South America | Brazil | polyprotein           | Dengue virus 4 |
| AMP43484.1 | BR005AM_2011                 | Human   | 2011-03-07 | South America | Brazil | polyprotein precursor | Dengue virus 4 |
| AKQ00031.1 | BR/SJRP/514/2012             | Human   | 2012-04-02 | South America | Brazil | polyprotein           | Dengue virus 4 |
| AIQ84245.1 | DENV-4/MT/BR33_TVP17919/2012 | Human   | 2012-04-20 | South America | Brazil | polyprotein           | Dengue virus 4 |
| AIQ84235.1 | DENV-4/MT/BR60_TVP17946/2012 | Human   | 2012-03-14 | South America | Brazil | polyprotein           | Dengue virus 4 |
| AIQ84238.1 | DENV-4/MT/BR52_TVP17938/2012 | Human   | 2012-03-20 | South America | Brazil | polyprotein           | Dengue virus 4 |
| AIQ84220.1 | DENV-4/MT/BR2_TVP17888/2012  | Human   | 2012-04-23 | South America | Brazil | polyprotein           | Dengue virus 4 |
| AIQ84226.1 | DENV-4/MT/BR24_TVP17910/2012 | Human   | 2012-04-19 | South America | Brazil | polyprotein           | Dengue virus 4 |
| AEX91754.1 | Br246RR/10                   | Human   | 2010-09-08 | South America | Brazil | polyprotein precursor | Dengue virus 4 |
| AFX65881.1 | H781363                      | Human   | 2011-03-18 | South America | Brazil | polyprotein           | Dengue virus 4 |
| AKQ00036.1 | BR/SJRP/733/2013             | Human   | 2013-01-30 | South America | Brazil | polyprotein           | Dengue virus 4 |
| AKQ00030.1 | BR/SJRP/506/2012             | Human   | 2012-03-16 | South America | Brazil | polyprotein           | Dengue virus 4 |
| ANK35834.1 | LRV13/422                    | Human   | 2013-01-01 | South America | Brazil | polyprotein           | Dengue virus 4 |
| AIQ84231.1 | DENV-4/MT/BR91_TVP17968/2012 | Human   | 2012-02-03 | South America | Brazil | polyprotein           | Dengue virus 4 |
| AIQ84221.1 | DENV-4/MT/BR8_TVP17894/2012  | Human   | 2012-04-23 | South America | Brazil | polyprotein           | Dengue virus 4 |



|            |                              |       |            |               |        |             |                |
|------------|------------------------------|-------|------------|---------------|--------|-------------|----------------|
| AIQ84236.1 | DENV-4/MT/BR55_TVP17941/2012 | Human | 2012-03-14 | South America | Brazil | polyprotein | Dengue virus 4 |
| AFX65874.1 | H779228                      | Human | 2011-01-14 | South America | Brazil | polyprotein | Dengue virus 4 |
| AKQ00032.1 | BR/SJRP/556/2012             | Human | 2012-07-11 | South America | Brazil | polyprotein | Dengue virus 4 |
| AKQ00034.1 | BR/SJRP/610/2013             | Human | 2013-01-07 | South America | Brazil | polyprotein | Dengue virus 4 |
| AKQ00028.1 | BR/SJRP/500/2012             | Human | 2012-03-09 | South America | Brazil | polyprotein | Dengue virus 4 |
| AIQ84222.1 | DENV-4/MT/BR9_TVP17895/2012  | Human | 2012-04-18 | South America | Brazil | polyprotein | Dengue virus 4 |



[illegible]



[illegible]



[illegible]



[illegible]



[illegible]



|        |           |     |      |      |                |      |       |             |   |         |   |    |              |          |   |   |   |   |   |   |   |   |   |    |    |    |    |    |    |    |    |    |    |    |    |    |    |    |    |    |    |    |    |    |    |    |    |    |    |    |    |    |    |    |    |    |    |    |    |    |    |    |    |    |    |    |    |    |    |    |    |    |    |    |    |    |    |    |    |    |    |    |    |    |    |    |    |    |    |    |    |    |    |    |    |    |    |    |    |    |    |    |    |    |    |    |    |    |    |    |    |    |    |     |
|--------|-----------|-----|------|------|----------------|------|-------|-------------|---|---------|---|----|--------------|----------|---|---|---|---|---|---|---|---|---|----|----|----|----|----|----|----|----|----|----|----|----|----|----|----|----|----|----|----|----|----|----|----|----|----|----|----|----|----|----|----|----|----|----|----|----|----|----|----|----|----|----|----|----|----|----|----|----|----|----|----|----|----|----|----|----|----|----|----|----|----|----|----|----|----|----|----|----|----|----|----|----|----|----|----|----|----|----|----|----|----|----|----|----|----|----|----|----|----|----|-----|
| 000001 | ADAMTS-1  | NCD | 1001 | 1001 | HLA-DQA1*02:01 | B*TA | <100% | Demographic | 2 | SLC90F7 | 1 | IF | Phylogenetic | Position | 1 | 2 | 3 | 4 | 5 | 6 | 7 | 8 | 9 | 10 | 11 | 12 | 13 | 14 | 15 | 16 | 17 | 18 | 19 | 20 | 21 | 22 | 23 | 24 | 25 | 26 | 27 | 28 | 29 | 30 | 31 | 32 | 33 | 34 | 35 | 36 | 37 | 38 | 39 | 40 | 41 | 42 | 43 | 44 | 45 | 46 | 47 | 48 | 49 | 50 | 51 | 52 | 53 | 54 | 55 | 56 | 57 | 58 | 59 | 60 | 61 | 62 | 63 | 64 | 65 | 66 | 67 | 68 | 69 | 70 | 71 | 72 | 73 | 74 | 75 | 76 | 77 | 78 | 79 | 80 | 81 | 82 | 83 | 84 | 85 | 86 | 87 | 88 | 89 | 90 | 91 | 92 | 93 | 94 | 95 | 96 | 97 | 98 | 99 | 100 |
| 000002 | ADAMTS-2  | NCD | 1001 | 1001 | HLA-DQA1*02:01 | B*TA | <100% | Demographic | 2 | SLC90F7 | 1 | IF | Phylogenetic | Position | 1 | 2 | 3 | 4 | 5 | 6 | 7 | 8 | 9 | 10 | 11 | 12 | 13 | 14 | 15 | 16 | 17 | 18 | 19 | 20 | 21 | 22 | 23 | 24 | 25 | 26 | 27 | 28 | 29 | 30 | 31 | 32 | 33 | 34 | 35 | 36 | 37 | 38 | 39 | 40 | 41 | 42 | 43 | 44 | 45 | 46 | 47 | 48 | 49 | 50 | 51 | 52 | 53 | 54 | 55 | 56 | 57 | 58 | 59 | 60 | 61 | 62 | 63 | 64 | 65 | 66 | 67 | 68 | 69 | 70 | 71 | 72 | 73 | 74 | 75 | 76 | 77 | 78 | 79 | 80 | 81 | 82 | 83 | 84 | 85 | 86 | 87 | 88 | 89 | 90 | 91 | 92 | 93 | 94 | 95 | 96 | 97 | 98 | 99 | 100 |
| 000003 | ADAMTS-3  | NCD | 1001 | 1001 | HLA-DQA1*02:01 | B*TA | <100% | Demographic | 2 | SLC90F7 | 1 | IF | Phylogenetic | Position | 1 | 2 | 3 | 4 | 5 | 6 | 7 | 8 | 9 | 10 | 11 | 12 | 13 | 14 | 15 | 16 | 17 | 18 | 19 | 20 | 21 | 22 | 23 | 24 | 25 | 26 | 27 | 28 | 29 | 30 | 31 | 32 | 33 | 34 | 35 | 36 | 37 | 38 | 39 | 40 | 41 | 42 | 43 | 44 | 45 | 46 | 47 | 48 | 49 | 50 | 51 | 52 | 53 | 54 | 55 | 56 | 57 | 58 | 59 | 60 | 61 | 62 | 63 | 64 | 65 | 66 | 67 | 68 | 69 | 70 | 71 | 72 | 73 | 74 | 75 | 76 | 77 | 78 | 79 | 80 | 81 | 82 | 83 | 84 | 85 | 86 | 87 | 88 | 89 | 90 | 91 | 92 | 93 | 94 | 95 | 96 | 97 | 98 | 99 | 100 |
| 000004 | ADAMTS-4  | NCD | 1001 | 1001 | HLA-DQA1*02:01 | B*TA | <100% | Demographic | 2 | SLC90F7 | 1 | IF | Phylogenetic | Position | 1 | 2 | 3 | 4 | 5 | 6 | 7 | 8 | 9 | 10 | 11 | 12 | 13 | 14 | 15 | 16 | 17 | 18 | 19 | 20 | 21 | 22 | 23 | 24 | 25 | 26 | 27 | 28 | 29 | 30 | 31 | 32 | 33 | 34 | 35 | 36 | 37 | 38 | 39 | 40 | 41 | 42 | 43 | 44 | 45 | 46 | 47 | 48 | 49 | 50 | 51 | 52 | 53 | 54 | 55 | 56 | 57 | 58 | 59 | 60 | 61 | 62 | 63 | 64 | 65 | 66 | 67 | 68 | 69 | 70 | 71 | 72 | 73 | 74 | 75 | 76 | 77 | 78 | 79 | 80 | 81 | 82 | 83 | 84 | 85 | 86 | 87 | 88 | 89 | 90 | 91 | 92 | 93 | 94 | 95 | 96 | 97 | 98 | 99 | 100 |
| 000005 | ADAMTS-5  | NCD | 1001 | 1001 | HLA-DQA1*02:01 | B*TA | <100% | Demographic | 2 | SLC90F7 | 1 | IF | Phylogenetic | Position | 1 | 2 | 3 | 4 | 5 | 6 | 7 | 8 | 9 | 10 | 11 | 12 | 13 | 14 | 15 | 16 | 17 | 18 | 19 | 20 | 21 | 22 | 23 | 24 | 25 | 26 | 27 | 28 | 29 | 30 | 31 | 32 | 33 | 34 | 35 | 36 | 37 | 38 | 39 | 40 | 41 | 42 | 43 | 44 | 45 | 46 | 47 | 48 | 49 | 50 | 51 | 52 | 53 | 54 | 55 | 56 | 57 | 58 | 59 | 60 | 61 | 62 | 63 | 64 | 65 | 66 | 67 | 68 | 69 | 70 | 71 | 72 | 73 | 74 | 75 | 76 | 77 | 78 | 79 | 80 | 81 | 82 | 83 | 84 | 85 | 86 | 87 | 88 | 89 | 90 | 91 | 92 | 93 | 94 | 95 | 96 | 97 | 98 | 99 | 100 |
| 000006 | ADAMTS-6  | NCD | 1001 | 1001 | HLA-DQA1*02:01 | B*TA | <100% | Demographic | 2 | SLC90F7 | 1 | IF | Phylogenetic | Position | 1 | 2 | 3 | 4 | 5 | 6 | 7 | 8 | 9 | 10 | 11 | 12 | 13 | 14 | 15 | 16 | 17 | 18 | 19 | 20 | 21 | 22 | 23 | 24 | 25 | 26 | 27 | 28 | 29 | 30 | 31 | 32 | 33 | 34 | 35 | 36 | 37 | 38 | 39 | 40 | 41 | 42 | 43 | 44 | 45 | 46 | 47 | 48 | 49 | 50 | 51 | 52 | 53 | 54 | 55 | 56 | 57 | 58 | 59 | 60 | 61 | 62 | 63 | 64 | 65 | 66 | 67 | 68 | 69 | 70 | 71 | 72 | 73 | 74 | 75 | 76 | 77 | 78 | 79 | 80 | 81 | 82 | 83 | 84 | 85 | 86 | 87 | 88 | 89 | 90 | 91 | 92 | 93 | 94 | 95 | 96 | 97 | 98 | 99 | 100 |
| 000007 | ADAMTS-7  | NCD | 1001 | 1001 | HLA-DQA1*02:01 | B*TA | <100% | Demographic | 2 | SLC90F7 | 1 | IF | Phylogenetic | Position | 1 | 2 | 3 | 4 | 5 | 6 | 7 | 8 | 9 | 10 | 11 | 12 | 13 | 14 | 15 | 16 | 17 | 18 | 19 | 20 | 21 | 22 | 23 | 24 | 25 | 26 | 27 | 28 | 29 | 30 | 31 | 32 | 33 | 34 | 35 | 36 | 37 | 38 | 39 | 40 | 41 | 42 | 43 | 44 | 45 | 46 | 47 | 48 | 49 | 50 | 51 | 52 | 53 | 54 | 55 | 56 | 57 | 58 | 59 | 60 | 61 | 62 | 63 | 64 | 65 | 66 | 67 | 68 | 69 | 70 | 71 | 72 | 73 | 74 | 75 | 76 | 77 | 78 | 79 | 80 | 81 | 82 | 83 | 84 | 85 | 86 | 87 | 88 | 89 | 90 | 91 | 92 | 93 | 94 | 95 | 96 | 97 | 98 | 99 | 100 |
| 000008 | ADAMTS-8  | NCD | 1001 | 1001 | HLA-DQA1*02:01 | B*TA | <100% | Demographic | 2 | SLC90F7 | 1 | IF | Phylogenetic | Position | 1 | 2 | 3 | 4 | 5 | 6 | 7 | 8 | 9 | 10 | 11 | 12 | 13 | 14 | 15 | 16 | 17 | 18 | 19 | 20 | 21 | 22 | 23 | 24 | 25 | 26 | 27 | 28 | 29 | 30 | 31 | 32 | 33 | 34 | 35 | 36 | 37 | 38 | 39 | 40 | 41 | 42 | 43 | 44 | 45 | 46 | 47 | 48 | 49 | 50 | 51 | 52 | 53 | 54 | 55 | 56 | 57 | 58 | 59 | 60 | 61 | 62 | 63 | 64 | 65 | 66 | 67 | 68 | 69 | 70 | 71 | 72 | 73 | 74 | 75 | 76 | 77 | 78 | 79 | 80 | 81 | 82 | 83 | 84 | 85 | 86 | 87 | 88 | 89 | 90 | 91 | 92 | 93 | 94 | 95 | 96 | 97 | 98 | 99 | 100 |
| 000009 | ADAMTS-9  | NCD | 1001 | 1001 | HLA-DQA1*02:01 | B*TA | <100% | Demographic | 2 | SLC90F7 | 1 | IF | Phylogenetic | Position | 1 | 2 | 3 | 4 | 5 | 6 | 7 | 8 | 9 | 10 | 11 | 12 | 13 | 14 | 15 | 16 | 17 | 18 | 19 | 20 | 21 | 22 | 23 | 24 | 25 | 26 | 27 | 28 | 29 | 30 | 31 | 32 | 33 | 34 | 35 | 36 | 37 | 38 | 39 | 40 | 41 | 42 | 43 | 44 | 45 | 46 | 47 | 48 | 49 | 50 | 51 | 52 | 53 | 54 | 55 | 56 | 57 | 58 | 59 | 60 | 61 | 62 | 63 | 64 | 65 | 66 | 67 | 68 | 69 | 70 | 71 | 72 | 73 | 74 | 75 | 76 | 77 | 78 | 79 | 80 | 81 | 82 | 83 | 84 | 85 | 86 | 87 | 88 | 89 | 90 | 91 | 92 | 93 | 94 | 95 | 96 | 97 | 98 | 99 | 100 |
| 000010 | ADAMTS-10 | NCD | 1001 | 1001 | HLA-DQA1*02:01 | B*TA | <100% | Demographic | 2 | SLC90F7 | 1 | IF | Phylogenetic | Position | 1 | 2 | 3 | 4 | 5 | 6 | 7 | 8 | 9 | 10 | 11 | 12 | 13 | 14 | 15 | 16 | 17 | 18 | 19 | 20 | 21 | 22 | 23 | 24 | 25 | 26 | 27 | 28 | 29 | 30 | 31 | 32 | 33 | 34 | 35 | 36 | 37 | 38 | 39 | 40 | 41 | 42 | 43 | 44 | 45 | 46 | 47 | 48 | 49 | 50 | 51 | 52 | 53 | 54 | 55 | 56 | 57 | 58 | 59 | 60 | 61 | 62 | 63 | 64 | 65 | 66 | 67 | 68 | 69 | 70 | 71 | 72 | 73 | 74 | 75 | 76 | 77 | 78 | 79 | 80 | 81 | 82 | 83 | 84 | 85 | 86 | 87 | 88 | 89 | 90 | 91 | 92 | 93 | 94 | 95 | 96 | 97 | 98 | 99 | 100 |
| 000011 | ADAMTS-11 | NCD | 1001 | 1001 | HLA-DQA1*02:01 | B*TA | <100% | Demographic | 2 | SLC90F7 | 1 | IF | Phylogenetic | Position | 1 | 2 | 3 | 4 | 5 | 6 | 7 | 8 | 9 | 10 | 11 | 12 | 13 | 14 | 15 | 16 | 17 | 18 | 19 | 20 | 21 | 22 | 23 | 24 | 25 | 26 | 27 | 28 | 29 | 30 | 31 | 32 | 33 | 34 | 35 | 36 | 37 | 38 | 39 | 40 | 41 | 42 | 43 | 44 | 45 | 46 | 47 | 48 | 49 | 50 | 51 | 52 | 53 | 54 | 55 | 56 | 57 | 58 | 59 | 60 | 61 | 62 | 63 | 64 | 65 | 66 | 67 | 68 | 69 | 70 | 71 | 72 | 73 | 74 | 75 | 76 | 77 | 78 | 79 | 80 | 81 | 82 | 83 | 84 | 85 | 86 | 87 | 88 | 89 | 90 | 91 | 92 | 93 | 94 | 95 | 96 | 97 | 98 | 99 | 100 |
| 000012 | ADAMTS-12 | NCD | 1001 | 1001 | HLA-DQA1*02:01 | B*TA | <100% | Demographic | 2 | SLC90F7 | 1 | IF | Phylogenetic | Position | 1 | 2 | 3 | 4 | 5 | 6 | 7 | 8 | 9 | 10 | 11 | 12 | 13 | 14 | 15 | 16 | 17 | 18 | 19 | 20 | 21 | 22 | 23 | 24 | 25 | 26 | 27 | 28 | 29 | 30 | 31 | 32 | 33 | 34 | 35 | 36 | 37 | 38 | 39 | 40 | 41 | 42 | 43 | 44 | 45 | 46 | 47 | 48 | 49 | 50 | 51 | 52 | 53 | 54 | 55 | 56 | 57 | 58 | 59 | 60 | 61 | 62 | 63 | 64 | 65 | 66 | 67 | 68 | 69 | 70 | 71 | 72 | 73 | 74 | 75 | 76 | 77 | 78 | 79 | 80 | 81 | 82 | 83 | 84 | 85 | 86 | 87 | 88 | 89 | 90 | 91 | 92 | 93 | 94 | 95 | 96 | 97 | 98 | 99 | 100 |
| 000013 | ADAMTS-13 | NCD | 1001 | 1001 | HLA-DQA1*02:01 | B*TA | <100% | Demographic | 2 | SLC90F7 | 1 | IF | Phylogenetic | Position | 1 | 2 | 3 | 4 | 5 | 6 | 7 | 8 | 9 | 10 | 11 | 12 | 13 | 14 | 15 | 16 | 17 | 18 | 19 | 20 | 21 | 22 | 23 | 24 | 25 | 26 | 27 | 28 | 29 | 30 | 31 | 32 | 33 | 34 | 35 | 36 | 37 | 38 | 39 | 40 | 41 | 42 | 43 | 44 | 45 | 46 | 47 | 48 | 49 | 50 | 51 | 52 | 53 | 54 | 55 | 56 | 57 | 58 | 59 | 60 | 61 | 62 | 63 | 64 | 65 | 66 | 67 | 68 | 69 | 70 | 71 | 72 | 73 | 74 | 75 | 76 | 77 | 78 | 79 | 80 | 81 | 82 | 83 | 84 | 85 | 86 | 87 | 88 | 89 | 90 | 91 | 92 | 93 | 94 | 95 | 96 | 97 | 98 | 99 | 100 |
| 000014 | ADAMTS-14 | NCD | 1001 | 1001 | HLA-DQA1*02:01 | B*TA | <100% | Demographic | 2 | SLC90F7 | 1 | IF | Phylogenetic | Position | 1 | 2 | 3 | 4 | 5 | 6 | 7 | 8 | 9 | 10 | 11 | 12 | 13 | 14 | 15 | 16 | 17 | 18 | 19 | 20 | 21 | 22 | 23 | 24 | 25 | 26 | 27 | 28 | 29 | 30 | 31 | 32 | 33 | 34 | 35 | 36 | 37 | 38 | 39 | 40 | 41 | 42 | 43 | 44 | 45 | 46 | 47 | 48 | 49 | 50 | 51 | 52 | 53 | 54 | 55 | 56 | 57 | 58 | 59 | 60 | 61 | 62 | 63 | 64 | 65 | 66 | 67 | 68 | 69 | 70 | 71 | 72 | 73 | 74 | 75 | 76 | 77 | 78 | 79 | 80 | 81 | 82 | 83 | 84 | 85 | 86 | 87 | 88 | 89 | 90 | 91 | 92 | 93 | 94 | 95 | 96 | 97 | 98 | 99 | 100 |
| 000015 | ADAMTS-15 | NCD | 1001 | 1001 | HLA-DQA1*02:01 | B*TA | <100% | Demographic | 2 | SLC90F7 | 1 | IF | Phylogenetic | Position | 1 | 2 | 3 | 4 | 5 | 6 | 7 | 8 | 9 | 10 | 11 | 12 | 13 | 14 | 15 | 16 | 17 | 18 | 19 | 20 | 21 | 22 | 23 | 24 | 25 | 26 | 27 | 28 | 29 | 30 | 31 | 32 | 33 | 34 | 35 | 36 | 37 | 38 | 39 | 40 | 41 | 42 | 43 | 44 | 45 | 46 | 47 | 48 | 49 | 50 | 51 | 52 | 53 | 54 | 55 | 56 | 57 | 58 | 59 | 60 | 61 | 62 | 63 | 64 | 65 | 66 | 67 | 68 | 69 | 70 | 71 | 72 | 73 | 74 | 75 | 76 | 77 | 78 | 79 | 80 | 81 | 82 | 83 | 84 | 85 | 86 | 87 | 88 | 89 | 90 | 91 | 92 | 93 | 94 | 95 | 96 | 97 | 98 | 99 | 100 |







[illegible]







[illegible]



### CD8 DENV-1 Epitopes

[illegible]



|         |          |     |      |      |            |          |                |         |              |          |   |   |   |   |   |   |   |   |   |   |   |   |   |   |   |   |   |   |   |   |   |   |   |   |   |   |   |   |   |   |   |   |   |   |   |   |   |   |   |   |   |   |   |   |   |   |   |   |   |   |   |   |   |   |   |   |   |   |   |   |   |   |   |   |   |   |   |   |   |   |   |   |   |   |   |   |   |   |   |   |   |   |   |   |   |   |   |   |   |   |   |   |   |   |   |   |   |   |   |   |   |   |   |   |   |   |   |   |   |   |   |   |   |   |   |   |   |   |   |   |   |   |   |   |   |   |   |   |   |   |   |   |   |   |   |   |   |   |   |   |   |   |   |   |   |   |   |   |   |   |   |   |   |   |   |   |   |   |   |   |   |   |   |   |   |   |   |   |   |   |   |   |   |   |   |   |   |   |   |   |   |   |   |   |   |   |   |   |   |   |   |   |   |   |   |   |   |   |   |   |   |   |   |   |   |   |   |   |   |   |   |   |   |   |   |   |   |   |   |   |   |   |   |   |   |   |   |   |   |   |   |   |   |   |   |   |   |   |   |   |   |   |   |   |   |   |   |   |   |   |   |   |   |   |   |   |   |   |   |   |   |   |   |   |   |   |   |   |   |   |   |   |   |   |   |   |   |   |   |   |   |   |   |   |   |   |   |   |   |   |   |   |   |   |   |   |   |   |   |   |   |   |   |   |   |   |   |   |   |   |   |   |   |   |   |   |   |   |   |   |   |   |   |   |   |   |   |   |   |   |   |   |   |   |   |   |   |   |   |   |   |   |   |   |   |   |   |   |   |   |   |   |   |   |   |   |   |   |   |   |   |   |   |   |   |   |   |   |   |   |   |   |   |   |   |   |   |   |   |   |   |   |   |   |   |   |   |   |   |   |   |   |   |   |   |   |   |   |   |   |   |   |   |   |   |   |   |   |   |   |   |   |   |   |   |   |   |   |   |   |   |   |   |   |   |   |   |   |   |   |   |   |   |   |   |   |   |   |   |   |   |   |   |   |   |   |   |   |   |   |   |   |   |   |   |   |   |   |   |   |   |   |   |   |   |   |   |   |   |   |   |   |   |   |   |   |   |   |   |   |   |   |   |   |   |   |   |   |   |   |   |   |   |   |   |   |   |   |   |   |   |   |   |   |   |   |   |   |   |   |   |   |   |   |   |   |   |   |   |   |   |   |   |   |   |   |   |   |   |   |   |   |   |   |   |   |   |   |   |   |   |   |   |   |   |   |   |   |   |   |   |   |   |   |   |   |   |   |   |   |   |   |   |   |   |   |   |   |   |   |   |   |   |   |   |   |   |   |   |   |   |   |   |   |   |   |   |   |   |   |   |   |   |   |   |   |   |   |   |   |   |   |   |   |   |   |   |   |   |   |   |   |   |   |   |   |   |   |   |   |   |   |   |   |   |   |   |   |   |   |   |   |   |   |   |   |   |   |   |   |   |   |   |   |   |   |   |   |   |   |   |   |   |   |   |   |   |   |   |   |   |   |   |   |   |   |   |   |   |   |   |   |   |   |   |   |   |   |   |   |   |   |   |   |   |   |   |   |   |   |   |   |   |   |   |   |   |   |   |   |   |   |   |   |   |   |   |   |   |   |   |   |   |   |   |   |   |   |   |   |   |   |   |   |   |   |   |   |   |   |   |   |   |   |   |   |   |   |   |   |   |   |   |   |   |   |   |   |   |   |   |   |   |   |   |   |   |   |   |   |   |   |   |   |   |   |   |   |   |   |   |   |   |   |   |   |   |   |   |   |   |   |   |   |   |   |   |   |   |   |   |   |   |   |   |   |   |   |   |   |   |   |   |   |   |   |   |   |   |   |   |   |   |   |   |   |   |   |   |   |   |   |   |   |   |   |   |   |   |   |   |   |   |   |   |   |   |   |   |   |   |   |   |   |   |   |   |   |   |   |   |   |   |   |   |   |   |   |   |   |   |   |   |   |   |   |   |   |   |   |   |   |   |   |   |   |   |   |   |   |   |   |   |   |   |   |   |   |   |   |   |   |   |   |   |   |   |   |   |   |   |   |   |   |   |   |   |   |   |   |   |   |   |   |   |   |   |   |   |   |   |   |   |   |   |   |   |   |   |   |   |   |   |   |   |   |   |   |   |   |   |   |   |   |   |   |   |   |   |   |   |   |   |   |   |   |   |   |   |   |   |   |   |   |   |   |   |   |   |   |   |   |   |   |   |   |   |   |   |   |   |   |   |   |   |   |   |   |   |   |   |   |   |   |   |   |   |   |   |   |   |   |   |   |   |   |   |   |   |   |   |   |   |   |   |   |   |   |   |   |   |   |   |   |   |   |   |   |   |   |   |   |   |   |   |   |   |   |   |   |   |   |   |   |   |   |   |   |   |   |   |   |   |   |   |   |   |   |   |   |   |   |   |   |   |   |   |   |   |   |   |   |   |   |   |   |   |   |   |   |   |   |   |   |   |   |   |   |   |   |   |   |   |   |   |   |   |   |   |   |   |   |   |   |   |   |   |   |   |   |   |   |   |   |   |   |   |   |   |   |   |   |   |   |   |   |   |   |   |   |   |   |   |   |   |   |   |   |   |   |   |   |   |   |   |   |   |   |   |   |   |   |   |   |   |   |   |   |   |   |   |   |   |   |   |   |   |   |   |   |   |   |   |   |   |   |   |   |   |   |   |   |   |   |   |   |   |   |   |   |   |   |   |   |   |   |   |   |   |   |   |   |   |   |   |   |   |   |   |   |   |
|---------|----------|-----|------|------|------------|----------|----------------|---------|--------------|----------|---|---|---|---|---|---|---|---|---|---|---|---|---|---|---|---|---|---|---|---|---|---|---|---|---|---|---|---|---|---|---|---|---|---|---|---|---|---|---|---|---|---|---|---|---|---|---|---|---|---|---|---|---|---|---|---|---|---|---|---|---|---|---|---|---|---|---|---|---|---|---|---|---|---|---|---|---|---|---|---|---|---|---|---|---|---|---|---|---|---|---|---|---|---|---|---|---|---|---|---|---|---|---|---|---|---|---|---|---|---|---|---|---|---|---|---|---|---|---|---|---|---|---|---|---|---|---|---|---|---|---|---|---|---|---|---|---|---|---|---|---|---|---|---|---|---|---|---|---|---|---|---|---|---|---|---|---|---|---|---|---|---|---|---|---|---|---|---|---|---|---|---|---|---|---|---|---|---|---|---|---|---|---|---|---|---|---|---|---|---|---|---|---|---|---|---|---|---|---|---|---|---|---|---|---|---|---|---|---|---|---|---|---|---|---|---|---|---|---|---|---|---|---|---|---|---|---|---|---|---|---|---|---|---|---|---|---|---|---|---|---|---|---|---|---|---|---|---|---|---|---|---|---|---|---|---|---|---|---|---|---|---|---|---|---|---|---|---|---|---|---|---|---|---|---|---|---|---|---|---|---|---|---|---|---|---|---|---|---|---|---|---|---|---|---|---|---|---|---|---|---|---|---|---|---|---|---|---|---|---|---|---|---|---|---|---|---|---|---|---|---|---|---|---|---|---|---|---|---|---|---|---|---|---|---|---|---|---|---|---|---|---|---|---|---|---|---|---|---|---|---|---|---|---|---|---|---|---|---|---|---|---|---|---|---|---|---|---|---|---|---|---|---|---|---|---|---|---|---|---|---|---|---|---|---|---|---|---|---|---|---|---|---|---|---|---|---|---|---|---|---|---|---|---|---|---|---|---|---|---|---|---|---|---|---|---|---|---|---|---|---|---|---|---|---|---|---|---|---|---|---|---|---|---|---|---|---|---|---|---|---|---|---|---|---|---|---|---|---|---|---|---|---|---|---|---|---|---|---|---|---|---|---|---|---|---|---|---|---|---|---|---|---|---|---|---|---|---|---|---|---|---|---|---|---|---|---|---|---|---|---|---|---|---|---|---|---|---|---|---|---|---|---|---|---|---|---|---|---|---|---|---|---|---|---|---|---|---|---|---|---|---|---|---|---|---|---|---|---|---|---|---|---|---|---|---|---|---|---|---|---|---|---|---|---|---|---|---|---|---|---|---|---|---|---|---|---|---|---|---|---|---|---|---|---|---|---|---|---|---|---|---|---|---|---|---|---|---|---|---|---|---|---|---|---|---|---|---|---|---|---|---|---|---|---|---|---|---|---|---|---|---|---|---|---|---|---|---|---|---|---|---|---|---|---|---|---|---|---|---|---|---|---|---|---|---|---|---|---|---|---|---|---|---|---|---|---|---|---|---|---|---|---|---|---|---|---|---|---|---|---|---|---|---|---|---|---|---|---|---|---|---|---|---|---|---|---|---|---|---|---|---|---|---|---|---|---|---|---|---|---|---|---|---|---|---|---|---|---|---|---|---|---|---|---|---|---|---|---|---|---|---|---|---|---|---|---|---|---|---|---|---|---|---|---|---|---|---|---|---|---|---|---|---|---|---|---|---|---|---|---|---|---|---|---|---|---|---|---|---|---|---|---|---|---|---|---|---|---|---|---|---|---|---|---|---|---|---|---|---|---|---|---|---|---|---|---|---|---|---|---|---|---|---|---|---|---|---|---|---|---|---|---|---|---|---|---|---|---|---|---|---|---|---|---|---|---|---|---|---|---|---|---|---|---|---|---|---|---|---|---|---|---|---|---|---|---|---|---|---|---|---|---|---|---|---|---|---|---|---|---|---|---|---|---|---|---|---|---|---|---|---|---|---|---|---|---|---|---|---|---|---|---|---|---|---|---|---|---|---|---|---|---|---|---|---|---|---|---|---|---|---|---|---|---|---|---|---|---|---|---|---|---|---|---|---|---|---|---|---|---|---|---|---|---|---|---|---|---|---|---|---|---|---|---|---|---|---|---|---|---|---|---|---|---|---|---|---|---|---|---|---|---|---|---|---|---|---|---|---|---|---|---|---|---|---|---|---|---|---|---|---|---|---|---|---|---|---|---|---|---|---|---|---|---|---|---|---|---|---|---|---|---|---|---|---|---|---|---|---|---|---|---|---|---|---|---|---|---|---|---|---|---|---|---|---|---|---|---|---|---|---|---|---|---|---|---|---|---|---|---|---|---|---|---|---|---|---|---|---|---|---|---|---|---|---|---|---|---|---|---|---|---|---|---|---|---|---|---|---|---|---|---|---|---|---|---|---|---|---|---|---|---|---|---|---|---|---|---|---|---|---|---|---|---|---|---|---|---|---|---|---|---|---|---|---|---|---|---|---|---|---|---|---|---|---|---|---|---|---|---|---|---|---|---|---|---|---|---|---|---|---|---|---|---|---|---|---|---|---|---|---|---|---|---|---|---|---|---|---|---|---|---|---|---|---|---|---|---|---|---|---|---|---|---|---|---|---|---|---|---|---|---|---|---|---|---|---|---|---|---|---|---|---|---|---|---|---|---|---|---|---|---|---|---|---|---|---|---|---|---|---|---|---|---|---|---|---|---|---|---|---|---|---|---|---|---|---|---|---|---|---|---|---|---|---|---|---|---|---|---|---|---|---|---|---|---|---|---|---|---|---|---|---|---|---|---|---|---|---|---|
| 1840-18 | LAMATFAM | NE3 | 1202 | 1210 | HLA*F55:01 | 81%~100% | Dengue virus 1 | ELISPOT | IFNg release | Positive | 1 | 1 | 1 | 1 | 1 | 1 | 1 | 1 | 1 | 1 | 1 | 1 | 1 | 1 | 1 | 1 | 1 | 1 | 1 | 1 | 1 | 1 | 1 | 1 | 1 | 1 | 1 | 1 | 1 | 1 | 1 | 1 | 1 | 1 | 1 | 1 | 1 | 1 | 1 | 1 | 1 | 1 | 1 | 1 | 1 | 1 | 1 | 1 | 1 | 1 | 1 | 1 | 1 | 1 | 1 | 1 | 1 | 1 | 1 | 1 | 1 | 1 | 1 | 1 | 1 | 1 | 1 | 1 | 1 | 1 | 1 | 1 | 1 | 1 | 1 | 1 | 1 | 1 | 1 | 1 | 1 | 1 | 1 | 1 | 1 | 1 | 1 | 1 | 1 | 1 | 1 | 1 | 1 | 1 | 1 | 1 | 1 | 1 | 1 | 1 | 1 | 1 | 1 | 1 | 1 | 1 | 1 | 1 | 1 | 1 | 1 | 1 | 1 | 1 | 1 | 1 | 1 | 1 | 1 | 1 | 1 | 1 | 1 | 1 | 1 | 1 | 1 | 1 | 1 | 1 | 1 | 1 | 1 | 1 | 1 | 1 | 1 | 1 | 1 | 1 | 1 | 1 | 1 | 1 | 1 | 1 | 1 | 1 | 1 | 1 | 1 | 1 | 1 | 1 | 1 | 1 | 1 | 1 | 1 | 1 | 1 | 1 | 1 | 1 | 1 | 1 | 1 | 1 | 1 | 1 | 1 | 1 | 1 | 1 | 1 | 1 | 1 | 1 | 1 | 1 | 1 | 1 | 1 | 1 | 1 | 1 | 1 | 1 | 1 | 1 | 1 | 1 | 1 | 1 | 1 | 1 | 1 | 1 | 1 | 1 | 1 | 1 | 1 | 1 | 1 | 1 | 1 | 1 | 1 | 1 | 1 | 1 | 1 | 1 | 1 | 1 | 1 | 1 | 1 | 1 | 1 | 1 | 1 | 1 | 1 | 1 | 1 | 1 | 1 | 1 | 1 | 1 | 1 | 1 | 1 | 1 | 1 | 1 | 1 | 1 | 1 | 1 | 1 | 1 | 1 | 1 | 1 | 1 | 1 | 1 | 1 | 1 | 1 | 1 | 1 | 1 | 1 | 1 | 1 | 1 | 1 | 1 | 1 | 1 | 1 | 1 | 1 | 1 | 1 | 1 | 1 | 1 | 1 | 1 | 1 | 1 | 1 | 1 | 1 | 1 | 1 | 1 | 1 | 1 | 1 | 1 | 1 | 1 | 1 | 1 | 1 | 1 | 1 | 1 | 1 | 1 | 1 | 1 | 1 | 1 | 1 | 1 | 1 | 1 | 1 | 1 | 1 | 1 | 1 | 1 | 1 | 1 | 1 | 1 | 1 | 1 | 1 | 1 | 1 | 1 | 1 | 1 | 1 | 1 | 1 | 1 | 1 | 1 | 1 | 1 | 1 | 1 | 1 | 1 | 1 | 1 | 1 | 1 | 1 | 1 | 1 | 1 | 1 | 1 | 1 | 1 | 1 | 1 | 1 | 1 | 1 | 1 | 1 | 1 | 1 | 1 | 1 | 1 | 1 | 1 | 1 | 1 | 1 | 1 | 1 | 1 | 1 | 1 | 1 | 1 | 1 | 1 | 1 | 1 | 1 | 1 | 1 | 1 | 1 | 1 | 1 | 1 | 1 | 1 | 1 | 1 | 1 | 1 | 1 | 1 | 1 | 1 | 1 | 1 | 1 | 1 | 1 | 1 | 1 | 1 | 1 | 1 | 1 | 1 | 1 | 1 | 1 | 1 | 1 | 1 | 1 | 1 | 1 | 1 | 1 | 1 | 1 | 1 | 1 | 1 | 1 | 1 | 1 | 1 | 1 | 1 | 1 | 1 | 1 | 1 | 1 | 1 | 1 | 1 | 1 | 1 | 1 | 1 | 1 | 1 | 1 | 1 | 1 | 1 | 1 | 1 | 1 | 1 | 1 | 1 | 1 | 1 | 1 | 1 | 1 | 1 | 1 | 1 | 1 | 1 | 1 | 1 | 1 | 1 | 1 | 1 | 1 | 1 | 1 | 1 | 1 | 1 | 1 | 1 | 1 | 1 | 1 | 1 | 1 | 1 | 1 | 1 | 1 | 1 | 1 | 1 | 1 | 1 | 1 | 1 | 1 | 1 | 1 | 1 | 1 | 1 | 1 | 1 | 1 | 1 | 1 | 1 | 1 | 1 | 1 | 1 | 1 | 1 | 1 | 1 | 1 | 1 | 1 | 1 | 1 | 1 | 1 | 1 | 1 | 1 | 1 | 1 | 1 | 1 | 1 | 1 | 1 | 1 | 1 | 1 | 1 | 1 | 1 | 1 | 1 | 1 | 1 | 1 | 1 | 1 | 1 | 1 | 1 | 1 | 1 | 1 | 1 | 1 | 1 | 1 | 1 | 1 | 1 | 1 | 1 | 1 | 1 | 1 | 1 | 1 | 1 | 1 | 1 | 1 | 1 | 1 | 1 | 1 | 1 | 1 | 1 | 1 | 1 | 1 | 1 | 1 | 1 | 1 | 1 | 1 | 1 | 1 | 1 | 1 | 1 | 1 | 1 | 1 | 1 | 1 | 1 | 1 | 1 | 1 | 1 | 1 | 1 | 1 | 1 | 1 | 1 | 1 | 1 | 1 | 1 | 1 | 1 | 1 | 1 | 1 | 1 | 1 | 1 | 1 | 1 | 1 | 1 | 1 | 1 | 1 | 1 | 1 | 1 | 1 | 1 | 1 | 1 | 1 | 1 | 1 | 1 | 1 | 1 | 1 | 1 | 1 | 1 | 1 | 1 | 1 | 1 | 1 | 1 | 1 | 1 | 1 | 1 | 1 | 1 | 1 | 1 | 1 | 1 | 1 | 1 | 1 | 1 | 1 | 1 | 1 | 1 | 1 | 1 | 1 | 1 | 1 | 1 | 1 | 1 | 1 | 1 | 1 | 1 | 1 | 1 | 1 | 1 | 1 | 1 | 1 | 1 | 1 | 1 | 1 | 1 | 1 | 1 | 1 | 1 | 1 | 1 | 1 | 1 | 1 | 1 | 1 | 1 | 1 | 1 | 1 | 1 | 1 | 1 | 1 | 1 | 1 | 1 | 1 | 1 | 1 | 1 | 1 | 1 | 1 | 1 | 1 | 1 | 1 | 1 | 1 | 1 | 1 | 1 | 1 | 1 | 1 | 1 | 1 | 1 | 1 | 1 | 1 | 1 | 1 | 1 | 1 | 1 | 1 | 1 | 1 | 1 | 1 | 1 | 1 | 1 | 1 | 1 | 1 | 1 | 1 | 1 | 1 | 1 | 1 | 1 | 1 | 1 | 1 | 1 | 1 | 1 | 1 | 1 | 1 | 1 | 1 | 1 | 1 | 1 | 1 | 1 | 1 | 1 | 1 | 1 | 1 | 1 | 1 | 1 | 1 | 1 | 1 | 1 | 1 | 1 | 1 | 1 | 1 | 1 | 1 | 1 | 1 | 1 | 1 | 1 | 1 | 1 | 1 | 1 | 1 | 1 | 1 | 1 | 1 | 1 | 1 | 1 | 1 | 1 | 1 | 1 | 1 | 1 | 1 | 1 | 1 | 1 | 1 | 1 | 1 | 1 | 1 | 1 | 1 | 1 | 1 | 1 | 1 | 1 | 1 | 1 | 1 | 1 | 1 | 1 | 1 | 1 | 1 | 1 | 1 | 1 | 1 | 1 | 1 | 1 | 1 | 1 | 1 | 1 | 1 | 1 | 1 | 1 | 1 | 1 | 1 | 1 | 1 | 1 | 1 | 1 | 1 | 1 | 1 | 1 | 1 | 1 | 1 | 1 | 1 | 1 | 1 | 1 | 1 | 1 | 1 | 1 | 1 | 1 | 1 | 1 | 1 | 1 | 1 | 1 | 1 | 1 | 1 | 1 | 1 | 1 | 1 | 1 | 1 | 1 | 1 | 1 | 1 | 1 | 1 | 1 | 1 | 1 | 1 | 1 | 1 | 1 | 1 | 1 | 1 | 1 | 1 | 1 | 1 | 1 | 1 | 1 | 1 | 1 | 1 | 1 | 1 | 1 | 1 | 1 | 1 | 1 | 1 | 1 | 1 | 1 | 1 | 1 | 1 | 1 | 1 | 1 | 1 | 1 | 1 | 1 | 1 | 1 | 1 | 1 | 1 | 1 | 1 | 1 | 1 | 1 | 1 | 1 | 1 | 1 | 1 | 1 | 1 | 1 | 1 | 1 | 1 | 1 | 1 | 1 | 1 | 1 | 1 | 1 | 1 | 1 | 1 | 1 | 1 | 1 | 1 | 1 | 1 | 1 | 1 | 1 | 1 | 1 | 1 | 1 | 1 | 1 | 1 | 1 | 1 | 1 | 1 | 1 | 1 | 1 | 1 | 1 | 1 | 1 | 1 | 1 | 1 | 1 | 1 | 1 | 1 | 1 | 1 | 1 | 1 | 1 | 1 | 1 | 1 | 1 | 1 | 1 | 1 | 1 | 1 | 1 | 1 | 1 | 1 | 1 | 1 | 1 | 1 | 1 | 1 | 1 | 1 | 1 | 1 | 1 | 1 | 1 | 1 | 1 | 1 | 1 | 1 | 1 | 1 | 1 | 1 | 1 | 1 | 1 | 1 | 1 | 1 | 1 | 1 | 1 | 1 | 1 | 1 | 1 | 1 | 1 | 1 | 1 | 1 | 1 | 1 | 1 | 1 | 1 | 1 | 1 | 1 | 1 | 1 | 1 | 1 | 1 | 1 | 1 | 1 | 1 | 1 | 1 | 1 | 1 | 1 | 1 | 1 | 1 | 1 | 1 | 1 | 1 | 1 | 1 | 1 | 1 | 1 | 1 | 1 | 1 | 1 | 1 | 1 | 1 | 1 | 1 | 1 | 1 | 1 | 1 | 1 | 1 | 1 | 1 | 1 | 1 | 1 | 1 | 1 | 1 | 1 | 1 | 1 | 1 | 1 | 1 | 1 | 1 | 1 | 1 | 1 | 1 | 1 | 1 | 1 | 1 | 1 | 1 | 1 | 1 | 1 | 1 | 1 | 1 | 1 | 1 | 1 | 1 | 1 | 1 | 1 | 1 | 1 | 1 | 1 | 1 | 1 | 1 | 1 | 1 | 1 | 1 | 1 | 1 | 1 | 1 | 1 | 1 | 1 | 1 | 1 | 1 | 1 | 1 | 1 | 1 | 1 | 1 | 1 | 1 | 1 | 1 | 1 | 1 | 1 | 1 | 1 | 1 | 1 | 1 | 1 | 1 | 1 | 1 | 1 | 1 | 1 | 1 | 1 | 1 | 1 | 1 | 1 | 1 | 1 | 1 | 1 | 1 | 1 | 1 |
|---------|----------|-----|------|------|------------|----------|----------------|---------|--------------|----------|---|---|---|---|---|---|---|---|---|---|---|---|---|---|---|---|---|---|---|---|---|---|---|---|---|---|---|---|---|---|---|---|---|---|---|---|---|---|---|---|---|---|---|---|---|---|---|---|---|---|---|---|---|---|---|---|---|---|---|---|---|---|---|---|---|---|---|---|---|---|---|---|---|---|---|---|---|---|---|---|---|---|---|---|---|---|---|---|---|---|---|---|---|---|---|---|---|---|---|---|---|---|---|---|---|---|---|---|---|---|---|---|---|---|---|---|---|---|---|---|---|---|---|---|---|---|---|---|---|---|---|---|---|---|---|---|---|---|---|---|---|---|---|---|---|---|---|---|---|---|---|---|---|---|---|---|---|---|---|---|---|---|---|---|---|---|---|---|---|---|---|---|---|---|---|---|---|---|---|---|---|---|---|---|---|---|---|---|---|---|---|---|---|---|---|---|---|---|---|---|---|---|---|---|---|---|---|---|---|---|---|---|---|---|---|---|---|---|---|---|---|---|---|---|---|---|---|---|---|---|---|---|---|---|---|---|---|---|---|---|---|---|---|---|---|---|---|---|---|---|---|---|---|---|---|---|---|---|---|---|---|---|---|---|---|---|---|---|---|---|---|---|---|---|---|---|---|---|---|---|---|---|---|---|---|---|---|---|---|---|---|---|---|---|---|---|---|---|---|---|---|---|---|---|---|---|---|---|---|---|---|---|---|---|---|---|---|---|---|---|---|---|---|---|---|---|---|---|---|---|---|---|---|---|---|---|---|---|---|---|---|---|---|---|---|---|---|---|---|---|---|---|---|---|---|---|---|---|---|---|---|---|---|---|---|---|---|---|---|---|---|---|---|---|---|---|---|---|---|---|---|---|---|---|---|---|---|---|---|---|---|---|---|---|---|---|---|---|---|---|---|---|---|---|---|---|---|---|---|---|---|---|---|---|---|---|---|---|---|---|---|---|---|---|---|---|---|---|---|---|---|---|---|---|---|---|---|---|---|---|---|---|---|---|---|---|---|---|---|---|---|---|---|---|---|---|---|---|---|---|---|---|---|---|---|---|---|---|---|---|---|---|---|---|---|---|---|---|---|---|---|---|---|---|---|---|---|---|---|---|---|---|---|---|---|---|---|---|---|---|---|---|---|---|---|---|---|---|---|---|---|---|---|---|---|---|---|---|---|---|---|---|---|---|---|---|---|---|---|---|---|---|---|---|---|---|---|---|---|---|---|---|---|---|---|---|---|---|---|---|---|---|---|---|---|---|---|---|---|---|---|---|---|---|---|---|---|---|---|---|---|---|---|---|---|---|---|---|---|---|---|---|---|---|---|---|---|---|---|---|---|---|---|---|---|---|---|---|---|---|---|---|---|---|---|---|---|---|---|---|---|---|---|---|---|---|---|---|---|---|---|---|---|---|---|---|---|---|---|---|---|---|---|---|---|---|---|---|---|---|---|---|---|---|---|---|---|---|---|---|---|---|---|---|---|---|---|---|---|---|---|---|---|---|---|---|---|---|---|---|---|---|---|---|---|---|---|---|---|---|---|---|---|---|---|---|---|---|---|---|---|---|---|---|---|---|---|---|---|---|---|---|---|---|---|---|---|---|---|---|---|---|---|---|---|---|---|---|---|---|---|---|---|---|---|---|---|---|---|---|---|---|---|---|---|---|---|---|---|---|---|---|---|---|---|---|---|---|---|---|---|---|---|---|---|---|---|---|---|---|---|---|---|---|---|---|---|---|---|---|---|---|---|---|---|---|---|---|---|---|---|---|---|---|---|---|---|---|---|---|---|---|---|---|---|---|---|---|---|---|---|---|---|---|---|---|---|---|---|---|---|---|---|---|---|---|---|---|---|---|---|---|---|---|---|---|---|---|---|---|---|---|---|---|---|---|---|---|---|---|---|---|---|---|---|---|---|---|---|---|---|---|---|---|---|---|---|---|---|---|---|---|---|---|---|---|---|---|---|---|---|---|---|---|---|---|---|---|---|---|---|---|---|---|---|---|---|---|---|---|---|---|---|---|---|---|---|---|---|---|---|---|---|---|---|---|---|---|---|---|---|---|---|---|---|---|---|---|---|---|---|---|---|---|---|---|---|---|---|---|---|---|---|---|---|---|---|---|---|---|---|---|---|---|---|---|---|---|---|---|---|---|---|---|---|---|---|---|---|---|---|---|---|---|---|---|---|---|---|---|---|---|---|---|---|---|---|---|---|---|---|---|---|---|---|---|---|---|---|---|---|---|---|---|---|---|---|---|---|---|---|---|---|---|---|---|---|---|---|---|---|---|---|---|---|---|---|---|---|---|---|---|---|---|---|---|---|---|---|---|---|---|---|---|---|---|---|---|---|---|---|---|---|---|---|---|---|---|---|---|---|---|---|---|---|---|---|---|---|---|---|---|---|---|---|---|---|---|---|---|---|---|---|---|---|---|---|---|---|---|---|---|---|---|---|---|---|---|---|---|---|---|---|---|---|---|---|---|---|---|---|---|---|---|---|---|---|---|---|---|---|---|---|---|---|---|---|---|---|---|---|---|---|---|---|---|---|---|---|---|---|---|---|---|---|---|---|---|---|---|---|---|---|---|---|---|---|---|---|---|---|---|---|---|---|---|---|---|---|---|---|---|---|---|---|---|---|---|---|---|---|---|---|---|---|---|---|---|---|---|---|---|---|---|---|---|---|---|---|---|---|---|---|---|---|---|---|---|---|---|---|---|---|---|---|---|---|---|---|---|---|















### CD8 DENV-4 Epitopes

[illegible]



**Supplementary Table S8. Alignment of CD4 and CD8 epitopes in circulating dengue viruses from Mexico and six vaccine candidates.** Detailed information, for Mexico, on each of the vaccine carried CD4 and CD8 T cell epitopes that are not present in any of the viral isolates, present in all of the viral isolates, present in only 81% – <100% viral isolates, present in only 51% – 80% viral isolates, and present in only >0% – 50% of viral isolates for each of the epitope within each of the six vaccine candidates and for all the four dengue serotypes. The first table summarizes information retrieved on circulating viral isolate sequences available from Mexico. Next, the globally reported CD4/CD8 T cell epitopes are organized into: DENV-1 specific CD4 epitopes, DENV-2 specific CD4 epitopes, DENV-3 specific CD4 epitopes, DENV-1 specific CD8 epitopes, DENV-2 specific CD8 epitopes, DENV-3 specific CD8 epitopes. There are no DENV-4 sequences reported from Mexico. Also, the data for DENV-3 is not included in the analysis because of only 2 sequences, hence uninterpretable. In each of these tables, identity of the epitope to each of the corresponding viral isolate serotype and each of the vaccine constructs are indicated. Green color shade and number 1 indicates 100% identity in the given virus isolate/vaccine construct. Pink color shade and number zero indicates not identical in the given virus isolate/vaccine construct.



| NCBI ID    | Strain Name              | Host     | Date       | Continent     | Country | Prot_Name   | VirusType      |
|------------|--------------------------|----------|------------|---------------|---------|-------------|----------------|
| ACW82947.1 | DENV-1/MX/BID-V3696/2007 | Human    | 2007-01-01 | North America | Mexico  | polyprotein | Dengue virus 1 |
| ACW82962.1 | DENV-1/MX/BID-V3728/2007 | Human    | 2007-01-01 | North America | Mexico  | polyprotein | Dengue virus 1 |
| ACW82963.1 | DENV-1/MX/BID-V3730/2007 | Human    | 2007-01-01 | North America | Mexico  | polyprotein | Dengue virus 1 |
| ACW82941.1 | DENV-1/MX/BID-V3682/2007 | Human    | 2007-01-01 | North America | Mexico  | polyprotein | Dengue virus 1 |
| ACW82975.1 | DENV-1/MX/BID-V3754/2008 | Human    | 2008-01-01 | North America | Mexico  | polyprotein | Dengue virus 1 |
| ACW82944.1 | DENV-1/MX/BID-V3687/2007 | Human    | 2007-01-01 | North America | Mexico  | polyprotein | Dengue virus 1 |
| ACW82940.1 | DENV-1/MX/BID-V3665/2007 | Human    | 2007-01-01 | North America | Mexico  | polyprotein | Dengue virus 1 |
| ACW82978.1 | DENV-1/MX/BID-V3759/2008 | Mosquito | 2008-01-01 | North America | Mexico  | polyprotein | Dengue virus 1 |
| ACW82946.1 | DENV-1/MX/BID-V3694/2007 | Human    | 2007-01-01 | North America | Mexico  | polyprotein | Dengue virus 1 |
| ACW82974.1 | DENV-1/MX/BID-V3753/2008 | Human    | 2008-01-01 | North America | Mexico  | polyprotein | Dengue virus 1 |
| ACW82960.1 | DENV-1/MX/BID-V3726/2007 | Human    | 2007-01-01 | North America | Mexico  | polyprotein | Dengue virus 1 |
| ACW82971.1 | DENV-1/MX/BID-V3747/2008 | Human    | 2008-01-01 | North America | Mexico  | polyprotein | Dengue virus 1 |
| ACW82950.1 | DENV-1/MX/BID-V3699/2007 | Human    | 2007-01-01 | North America | Mexico  | polyprotein | Dengue virus 1 |
| ACW82964.1 | DENV-1/MX/BID-V3731/2007 | Human    | 2007-01-01 | North America | Mexico  | polyprotein | Dengue virus 1 |
| ACW82979.1 | DENV-1/MX/BID-V3760/2008 | Mosquito | 2008-01-01 | North America | Mexico  | polyprotein | Dengue virus 1 |
| ACW82977.1 | DENV-1/MX/BID-V3758/2008 | Mosquito | 2008-01-01 | North America | Mexico  | polyprotein | Dengue virus 1 |
| ACW82943.1 | DENV-1/MX/BID-V3686/2007 | Human    | 2007-01-01 | North America | Mexico  | polyprotein | Dengue virus 1 |
| ACW82945.1 | DENV-1/MX/BID-V3689/2007 | Human    | 2007-01-01 | North America | Mexico  | polyprotein | Dengue virus 1 |
| ACW82976.1 | DENV-1/MX/BID-V3756/2008 | Mosquito | 2008-01-01 | North America | Mexico  | polyprotein | Dengue virus 1 |
| ACW82951.1 | DENV-1/MX/BID-V3700/2007 | Human    | 2007-01-01 | North America | Mexico  | polyprotein | Dengue virus 1 |
| ACW82970.1 | DENV-1/MX/BID-V3746/2008 | Human    | 2008-01-01 | North America | Mexico  | polyprotein | Dengue virus 1 |
| ADA60779.1 | DENV-1/MX/BID-V3690/2007 | Human    | 2007-01-01 | North America | Mexico  | polyprotein | Dengue virus 1 |
| ADA60794.1 | DENV-1/MX/BID-V3748/2008 | Human    | 2008-01-01 | North America | Mexico  | polyprotein | Dengue virus 1 |
| ADA60781.1 | DENV-1/MX/BID-V3703/2007 | Human    | 2007-01-01 | North America | Mexico  | polyprotein | Dengue virus 1 |
| ADA60782.1 | DENV-1/MX/BID-V3707/2007 | Human    | 2007-01-01 | North America | Mexico  | polyprotein | Dengue virus 1 |
| ADA60787.1 | DENV-1/MX/BID-V3722/2007 | Human    | 2007-01-01 | North America | Mexico  | polyprotein | Dengue virus 1 |
| ADA60773.1 | DENV-1/MX/BID-V3669/2007 | Human    | 2007-01-01 | North America | Mexico  | polyprotein | Dengue virus 1 |
| ADA60795.1 | DENV-1/MX/BID-V3761/2008 | Mosquito | 2008-01-01 | North America | Mexico  | polyprotein | Dengue virus 1 |
| ADA60778.1 | DENV-1/MX/BID-V3688/2007 | Human    | 2007-01-01 | North America | Mexico  | polyprotein | Dengue virus 1 |
| ADA60772.1 | DENV-1/MX/BID-V3668/2007 | Human    | 2007-01-01 | North America | Mexico  | polyprotein | Dengue virus 1 |
| ADO97104.1 | DENV-1/MX/BID-V3733/2007 | Human    | 2007-01-01 | North America | Mexico  | polyprotein | Dengue virus 1 |
| AHI43703.1 | DENV-1/MX/BID-V7586/2007 | Human    | 2007-01-01 | North America | Mexico  | polyprotein | Dengue virus 1 |
| AHI43728.1 | DENV-1/MX/BID-V7614/2009 | Human    | 2009-01-01 | North America | Mexico  | polyprotein | Dengue virus 1 |



|            |                          |          |            |               |        |             |                |
|------------|--------------------------|----------|------------|---------------|--------|-------------|----------------|
| AHG23208.1 | DENV-1/MX/BID-V3676/2007 | Human    | 2007-01-01 | North America | Mexico | polyprotein | Dengue virus 1 |
| AHI43700.1 | DENV-1/MX/BID-V7572/2007 | Human    | 2007-01-01 | North America | Mexico | polyprotein | Dengue virus 1 |
| AHI43723.1 | DENV-1/MX/BID-V7609/2008 | Human    | 2008-01-01 | North America | Mexico | polyprotein | Dengue virus 1 |
| AHI43730.1 | DENV-1/MX/BID-V7619/2009 | Human    | 2009-01-01 | North America | Mexico | polyprotein | Dengue virus 1 |
| AHI43727.1 | DENV-1/MX/BID-V7613/2009 | Human    | 2009-01-01 | North America | Mexico | polyprotein | Dengue virus 1 |
| AHI43731.1 | DENV-1/MX/BID-V7624/2011 | Human    | 2011-01-01 | North America | Mexico | polyprotein | Dengue virus 1 |
| AHI43729.1 | DENV-1/MX/BID-V7615/2009 | Human    | 2009-01-01 | North America | Mexico | polyprotein | Dengue virus 1 |
| AHI43720.1 | DENV-1/MX/BID-V7606/2008 | Human    | 2008-01-01 | North America | Mexico | polyprotein | Dengue virus 1 |
| AHI43710.1 | DENV-1/MX/BID-V7593/2007 | Human    | 2007-01-01 | North America | Mexico | polyprotein | Dengue virus 1 |
| AHI43712.1 | DENV-1/MX/BID-V7595/2007 | Human    | 2007-01-01 | North America | Mexico | polyprotein | Dengue virus 1 |
| AHI43751.1 | DENV-1/MX/BID-V8195/2012 | Human    | 2012-01-01 | North America | Mexico | polyprotein | Dengue virus 1 |
| AHI43708.1 | DENV-1/MX/BID-V7591/2007 | Human    | 2007-01-01 | North America | Mexico | polyprotein | Dengue virus 1 |
| AHI43699.1 | DENV-1/MX/BID-V7569/2009 | Mosquito | 2009-01-01 | North America | Mexico | polyprotein | Dengue virus 1 |
| AHI43725.1 | DENV-1/MX/BID-V7611/2009 | Human    | 2009-01-01 | North America | Mexico | polyprotein | Dengue virus 1 |
| AHI43717.1 | DENV-1/MX/BID-V7601/2008 | Human    | 2008-01-01 | North America | Mexico | polyprotein | Dengue virus 1 |
| AHI43709.1 | DENV-1/MX/BID-V7592/2007 | Human    | 2007-01-01 | North America | Mexico | polyprotein | Dengue virus 1 |
| AHG23209.1 | DENV-1/MX/BID-V3725/2007 | Human    | 2007-01-01 | North America | Mexico | polyprotein | Dengue virus 1 |
| AHI43690.1 | DENV-1/MX/BID-V7302/2011 | Human    | 2011-01-01 | North America | Mexico | polyprotein | Dengue virus 1 |
| QNL13176.1 | Vero                     | Human    | 2019-10-07 | North America | Mexico | polyprotein | Dengue virus 1 |
| ACW82949.1 | DENV-1/MX/BID-V3698/2007 | Human    | 2007-01-01 | North America | Mexico | polyprotein | Dengue virus 1 |
| ACW82969.1 | DENV-1/MX/BID-V3744/2008 | Human    | 2008-01-01 | North America | Mexico | polyprotein | Dengue virus 1 |
| ACW82939.1 | DENV-1/MX/BID-V3664/2006 | Human    | 2006-01-01 | North America | Mexico | polyprotein | Dengue virus 1 |
| ACW82953.1 | DENV-1/MX/BID-V3709/2007 | Human    | 2007-01-01 | North America | Mexico | polyprotein | Dengue virus 1 |
| ACW82942.1 | DENV-1/MX/BID-V3685/2007 | Human    | 2007-01-01 | North America | Mexico | polyprotein | Dengue virus 1 |
| ACW82958.1 | DENV-1/MX/BID-V3723/2007 | Human    | 2007-01-01 | North America | Mexico | polyprotein | Dengue virus 1 |
| ACW82973.1 | DENV-1/MX/BID-V3752/2008 | Human    | 2008-01-01 | North America | Mexico | polyprotein | Dengue virus 1 |
| ACW82972.1 | DENV-1/MX/BID-V3749/2008 | Human    | 2008-01-01 | North America | Mexico | polyprotein | Dengue virus 1 |
| ADA60769.1 | DENV-1/MX/BID-V3658/2006 | Human    | 2006-01-01 | North America | Mexico | polyprotein | Dengue virus 1 |
| ADA60777.1 | DENV-1/MX/BID-V3679/2007 | Human    | 2007-01-01 | North America | Mexico | polyprotein | Dengue virus 1 |
| ADA60792.1 | DENV-1/MX/BID-V3742/2007 | Human    | 2007-01-01 | North America | Mexico | polyprotein | Dengue virus 1 |
| ADA60776.1 | DENV-1/MX/BID-V3677/2007 | Human    | 2007-01-01 | North America | Mexico | polyprotein | Dengue virus 1 |
| ADA60784.1 | DENV-1/MX/BID-V3712/2007 | Human    | 2007-01-01 | North America | Mexico | polyprotein | Dengue virus 1 |
| ADO97103.1 | DENV-1/MX/BID-V3683/2007 | Human    | 2007-01-01 | North America | Mexico | polyprotein | Dengue virus 1 |
| ADO97105.1 | DENV-1/MX/BID-V3757/2008 | Mosquito | 2008-01-01 | North America | Mexico | polyprotein | Dengue virus 1 |



|            |                          |          |            |               |        |             |                |
|------------|--------------------------|----------|------------|---------------|--------|-------------|----------------|
| AHI43716.1 | DENV-1/MX/BID-V7600/2008 | Human    | 2008-01-01 | North America | Mexico | polyprotein | Dengue virus 1 |
| AHI43719.1 | DENV-1/MX/BID-V7605/2008 | Human    | 2008-01-01 | North America | Mexico | polyprotein | Dengue virus 1 |
| AHI43711.1 | DENV-1/MX/BID-V7594/2007 | Human    | 2007-01-01 | North America | Mexico | polyprotein | Dengue virus 1 |
| AHI43689.1 | DENV-1/MX/BID-V7298/2011 | Human    | 2011-01-01 | North America | Mexico | polyprotein | Dengue virus 1 |
| AHI43701.1 | DENV-1/MX/BID-V7576/2007 | Human    | 2007-01-01 | North America | Mexico | polyprotein | Dengue virus 1 |
| AHI43707.1 | DENV-1/MX/BID-V7590/2007 | Human    | 2007-01-01 | North America | Mexico | polyprotein | Dengue virus 1 |
| AHI43752.1 | DENV-1/MX/BID-V8196/2011 | Human    | 2011-01-01 | North America | Mexico | polyprotein | Dengue virus 1 |
| AHI43695.1 | DENV-1/MX/BID-V7563/2008 | Mosquito | 2008-01-01 | North America | Mexico | polyprotein | Dengue virus 1 |
| AHI43696.1 | DENV-1/MX/BID-V7565/2008 | Mosquito | 2008-01-01 | North America | Mexico | polyprotein | Dengue virus 1 |
| AHI43726.1 | DENV-1/MX/BID-V7612/2009 | Human    | 2009-01-01 | North America | Mexico | polyprotein | Dengue virus 1 |
| AHG23193.1 | DENV-1/MX/BID-V3705/2007 | Human    | 2007-01-01 | North America | Mexico | polyprotein | Dengue virus 1 |
| AHI43704.1 | DENV-1/MX/BID-V7587/2007 | Human    | 2007-01-01 | North America | Mexico | polyprotein | Dengue virus 1 |
| AHI43718.1 | DENV-1/MX/BID-V7604/2008 | Human    | 2008-01-01 | North America | Mexico | polyprotein | Dengue virus 1 |
| AHI43702.1 | DENV-1/MX/BID-V7580/2007 | Human    | 2007-01-01 | North America | Mexico | polyprotein | Dengue virus 1 |
| ACW82956.1 | DENV-2/MX/BID-V3714/2007 | Human    | 2007-01-01 | North America | Mexico | polyprotein | Dengue virus 2 |
| ACQ44478.1 | DENV-2/MX/BID-V2964/2008 | Human    | 2008-01-01 | North America | Mexico | polyprotein | Dengue virus 2 |
| ACY70846.1 | DENV-2/MX/BID-V3768/2004 | Human    | 2004-01-01 | North America | Mexico | polyprotein | Dengue virus 2 |
| ADA60786.1 | DENV-2/MX/BID-V3717/2007 | Human    | 2007-01-01 | North America | Mexico | polyprotein | Dengue virus 2 |
| ADA60770.1 | DENV-2/MX/BID-V3661/2006 | Human    | 2006-01-01 | North America | Mexico | polyprotein | Dengue virus 2 |
| AET43253.1 | DENV-2/MX/BID-V3763/2008 | Human    | 2008-01-01 | North America | Mexico | polyprotein | Dengue virus 2 |
| AHI43753.1 | DENV-2/MX/BID-V8199/2011 | Human    | 2011-01-01 | North America | Mexico | polyprotein | Dengue virus 2 |
| AHI43694.1 | DENV-2/MX/BID-V7542/2007 | Human    | 2007-01-01 | North America | Mexico | polyprotein | Dengue virus 2 |
| AHI43691.1 | DENV-2/MX/BID-V7535/2009 | Mosquito | 2009-01-01 | North America | Mexico | polyprotein | Dengue virus 2 |
| AHI43692.1 | DENV-2/MX/BID-V7537/2010 | Mosquito | 2010-01-01 | North America | Mexico | polyprotein | Dengue virus 2 |
| QBQ87236.1 | G2AE                     | Mosquito | 2012-01-01 | North America | Mexico | polyprotein | Dengue virus 2 |
| QBK56834.1 | C6L_48h                  | Unknown  | 2017-01-12 | North America | Mexico | polyprotein | Dengue virus 2 |
| QBQ87238.1 | G3AE                     | Mosquito | 2012-01-01 | North America | Mexico | polyprotein | Dengue virus 2 |
| ACW82937.1 | DENV-2/MX/BID-V3654/2006 | Human    | 2006-01-01 | North America | Mexico | polyprotein | Dengue virus 2 |
| ACW82955.1 | DENV-2/MX/BID-V3713/2007 | Human    | 2007-01-01 | North America | Mexico | polyprotein | Dengue virus 2 |
| ACS32035.1 | DENV-2/MX/BID-V2959/2005 | Human    | 2005-01-01 | North America | Mexico | polyprotein | Dengue virus 2 |
| QBK56835.1 | C6L_P30                  | Unknown  | 2017-01-12 | North America | Mexico | polyprotein | Dengue virus 2 |
| QBK56836.1 | C6L_P56                  | Unknown  | 2017-01-12 | North America | Mexico | polyprotein | Dengue virus 2 |
| QBQ87237.1 | G1AE                     | Mosquito | 2012-01-01 | North America | Mexico | polyprotein | Dengue virus 2 |
| QNG98968.1 | Vero                     | Human    | 2018-08-16 | North America | Mexico | polyprotein | Dengue virus 2 |



|            |                          |       |            |               |        |             |                |
|------------|--------------------------|-------|------------|---------------|--------|-------------|----------------|
| ACQ44481.1 | DENV-3/MX/BID-V2989/2007 | Human | 2007-01-01 | North America | Mexico | polyprotein | Dengue virus 3 |
| ACQ44480.1 | DENV-3/MX/BID-V2987/2006 | Human | 2006-01-01 | North America | Mexico | polyprotein | Dengue virus 3 |







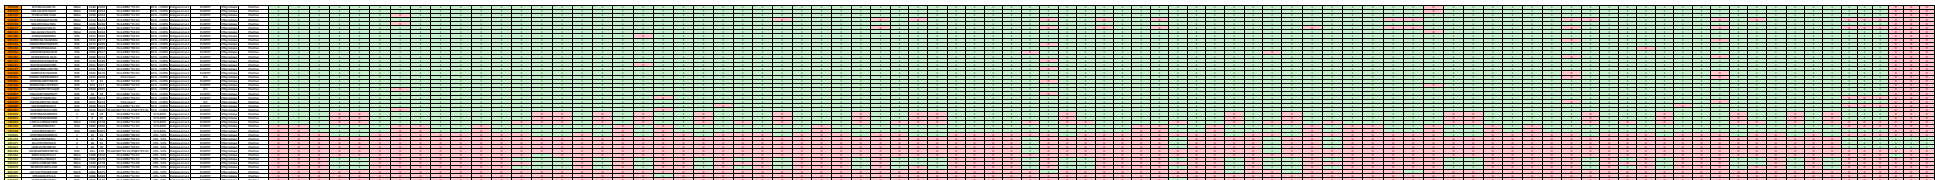



### CD4 DENV-2 Epitopes

| NCBI (Out of DBV2) circulating strains from Mexico, 100% identity+green, grey, red |                    |              |       |     |                          |      |                |                  |             |                     |           |           |           |            |            |           |           |           |           |           |           |           |           |           |           |           |           | DBV2 CONTRAST |      |     |           |      |      |   |
|------------------------------------------------------------------------------------|--------------------|--------------|-------|-----|--------------------------|------|----------------|------------------|-------------|---------------------|-----------|-----------|-----------|------------|------------|-----------|-----------|-----------|-----------|-----------|-----------|-----------|-----------|-----------|-----------|-----------|-----------|---------------|------|-----|-----------|------|------|---|
|                                                                                    | AA Seq             | Protein Name | Start | End | Athlete                  | step | Serotype       | Method/Technique | Assay Group | Qualitative Measure | ACW829551 | ACQ444441 | AC7Y08461 | ADA0697861 | ADA0770711 | AE1825511 | AHM375511 | ACB436921 | QB8636341 | QB8636341 | ACW923971 | ACW829551 | ACS250351 | QB8636351 | QB8636361 | QB8772371 | QNG898681 | TV003         | TDEN | CDV | Deceptual | WNVs | TV0V |   |
| 150404                                                                             | DLFLMALVLRFLTL     | C            | 102   | 116 | HIA-DRI1*1:01            | 0%   | Dengue virus 2 | ELISPT           | IgG release | Positive            | 0         | 0         | 0         | 0          | 0          | 0         | 0         | 0         | 0         | 0         | 0         | 0         | 0         | 0         | 0         | 0         | 0         | 0             | 0    | 0   | 0         | 0    | 0    | 0 |
| 1595123                                                                            | ACAMRI*TVMAHL      | C            | 103   | 117 | HIA-DRI1*08:02           | 0%   | Dengue virus 2 | ELISPT           | IgG release | Positive            | 0         | 0         | 0         | 0          | 0          | 0         | 0         | 0         | 0         | 0         | 0         | 0         | 0         | 0         | 0         | 0         | 0         | 0             | 0    | 0   | 0         | 0    | 0    | 0 |
| 195413                                                                             | GPFLFLMALVLRFL     | C            | 42    | 56  | HIA-DRI1*04:01           | 0%   | Dengue virus 2 | ELISPT           | IgG release | Positive            | 0         | 0         | 0         | 0          | 0          | 0         | 0         | 0         | 0         | 0         | 0         | 0         | 0         | 0         | 0         | 0         | 0         | 0             | 0    | 0   | 0         | 0    | 0    | 0 |
| 159412                                                                             | QUMMPFVMAHL        | C            | 103   | 117 | HIA-DRI1*08:02           | 0%   | Dengue virus 2 | ELISPT           | IgG release | Positive            | 0         | 0         | 0         | 0          | 0          | 0         | 0         | 0         | 0         | 0         | 0         | 0         | 0         | 0         | 0         | 0         | 0         | 0             | 0    | 0   | 0         | 0    | 0    | 0 |
| 159490                                                                             | IGRMALNLRNRRT      | C            | 88    | 102 | HIA-DRI1*11:01           | 0%   | Dengue virus 2 | ELISPT           | IgG release | Positive            | 0         | 0         | 0         | 0          | 0          | 0         | 0         | 0         | 0         | 0         | 0         | 0         | 0         | 0         | 0         | 0         | 0         | 0             | 0    | 0   | 0         | 0    | 0    | 0 |
| 159454                                                                             | LKFLMALVLRFLTL     | C            | 44    | 58  | HIA-DRI1*15:01           | 0%   | Dengue virus 2 | ELISPT           | IgG release | Positive            | 0         | 0         | 0         | 0          | 0          | 0         | 0         | 0         | 0         | 0         | 0         | 0         | 0         | 0         | 0         | 0         | 0         | 0             | 0    | 0   | 0         | 0    | 0    | 0 |
| 159510                                                                             | FLACVIMMPFVMAHL    | C            | 100   | 114 | HIA-DRI1*08:02           | 0%   | Dengue virus 2 | ELISPT           | IgG release | Positive            | 0         | 0         | 0         | 0          | 0          | 0         | 0         | 0         | 0         | 0         | 0         | 0         | 0         | 0         | 0         | 0         | 0         | 0             | 0    | 0   | 0         | 0    | 0    | 0 |
| 159604                                                                             | TVGVMLP*FMAAF      | C            | 101   | 115 | HIA-DRI1*08:02           | 0%   | Dengue virus 2 | ELISPT           | IgG release | Positive            | 0         | 0         | 0         | 0          | 0          | 0         | 0         | 0         | 0         | 0         | 0         | 0         | 0         | 0         | 0         | 0         | 0         | 0             | 0    | 0   | 0         | 0    | 0    | 0 |
| 53867                                                                              | RGFKREGIRMALNLR    | C            | 17    | 35  | HLA class II             | 0%   | Dengue virus 2 | ELISPT           | IgG release | Positive            | 0         | 0         | 0         | 0          | 0          | 0         | 0         | 0         | 0         | 0         | 0         | 0         | 0         | 0         | 0         | 0         | 0         | 0             | 0    | 0   | 0         | 0    | 0    | 0 |
| 53866                                                                              | HLA-DRI1*15:01     | C            | 52    | 66  | HLA-DRI1*15:01           | 0%   | Dengue virus 2 | ELISPT           | IgG release | Positive            | 0         | 0         | 0         | 0          | 0          | 0         | 0         | 0         | 0         | 0         | 0         | 0         | 0         | 0         | 0         | 0         | 0         | 0             | 0    | 0   | 0         | 0    | 0    | 0 |
| 538613                                                                             | IGRMALNLRNRRT      | C            | 87    | 101 | HIA-DRI1*11:01           | 0%   | Dengue virus 2 | ELISPT           | IgG release | Positive            | 0         | 0         | 0         | 0          | 0          | 0         | 0         | 0         | 0         | 0         | 0         | 0         | 0         | 0         | 0         | 0         | 0         | 0             | 0    | 0   | 0         | 0    | 0    | 0 |
| 53843                                                                              | GRMALNLRNRRT       | C            | 89    | 103 | HIA-DRI1*11:01           | 0%   | Dengue virus 2 | ELISPT           | IgG release | Positive            | 0         | 0         | 0         | 0          | 0          | 0         | 0         | 0         | 0         | 0         | 0         | 0         | 0         | 0         | 0         | 0         | 0         | 0             | 0    | 0   | 0         | 0    | 0    | 0 |
| 538445                                                                             | ATLALMALVLRFL      | C            | 46    | 60  | HIA-DRI1*15:06           | 0%   | Dengue virus 2 | ELISPT           | IgG release | Positive            | 0         | 0         | 0         | 0          | 0          | 0         | 0         | 0         | 0         | 0         | 0         | 0         | 0         | 0         | 0         | 0         | 0         | 0             | 0    | 0   | 0         | 0    | 0    | 0 |
| 52953                                                                              | TAGLFLVINGTKKANVLA | C            | 62    | 81  | HLA class II             | 0%   | Dengue virus 2 | ELISPT           | IgG release | Positive            | 0         | 0         | 0         | 0          | 0          | 0         | 0         | 0         | 0         | 0         | 0         | 0         | 0         | 0         | 0         | 0         | 0         | 0             | 0    | 0   | 0         | 0    | 0    | 0 |
| 739176                                                                             | IGRMALNLRNRRT      | C            | 88    | 102 | HIA-DRI1*14:02           | 0%   | Dengue virus 2 | ELISPT           | IgG release | Positive            | 0         | 0         | 0         | 0          | 0          | 0         | 0         | 0         | 0         | 0         | 0         | 0         | 0         | 0         | 0         | 0         | 0         | 0             | 0    | 0   | 0         | 0    | 0    | 0 |
| 739177                                                                             | IGRMALNLRNRRT      | C            | 88    | 102 | HIA-DRI1*14:02           | 0%   | Dengue virus 2 | ELISPT           | IgG release | Positive            | 0         | 0         | 0         | 0          | 0          | 0         | 0         | 0         | 0         | 0         | 0         | 0         | 0         | 0         | 0         | 0         | 0         | 0             | 0    | 0   | 0         | 0    | 0    | 0 |
| 739178                                                                             | IGRMALNLRNRRT      | C            | 88    | 102 | HIA-DRI1*14:02           | 0%   | Dengue virus 2 | ELISPT           | IgG release | Positive            | 0         | 0         | 0         | 0          | 0          | 0         | 0         | 0         | 0         | 0         | 0         | 0         | 0         | 0         | 0         | 0         | 0         | 0             | 0    | 0   | 0         | 0    | 0    | 0 |
| 739181                                                                             | IGRMALNLRNRRT      | C            | 88    | 102 | HIA-DRI1*14:02           | 0%   | Dengue virus 2 | ELISPT           | IgG release | Positive            | 0         | 0         | 0         | 0          | 0          | 0         | 0         | 0         | 0         | 0         | 0         | 0         | 0         | 0         | 0         | 0         | 0         | 0             | 0    | 0   | 0         | 0    | 0    | 0 |
| 739182                                                                             | IGRMALNLRNRRT      | C            | 88    | 102 | HIA-DRI1*14:02           | 0%   | Dengue virus 2 | ELISPT           | IgG release | Positive            | 0         | 0         | 0         | 0          | 0          | 0         | 0         | 0         | 0         | 0         | 0         | 0         | 0         | 0         | 0         | 0         | 0         | 0             | 0    | 0   | 0         | 0    | 0    | 0 |
| 739183                                                                             | IGRMALNLRNRRT      | C            | 88    | 102 | HIA-DRI1*14:02           | 0%   | Dengue virus 2 | ELISPT           | IgG release | Positive            | 0         | 0         | 0         | 0          | 0          | 0         | 0         | 0         | 0         | 0         | 0         | 0         | 0         | 0         | 0         | 0         | 0         | 0             | 0    | 0   | 0         | 0    | 0    | 0 |
| 739184                                                                             | IGRMALNLRNRRT      | C            | 88    | 102 | HIA-DRI1*14:02           | 0%   | Dengue virus 2 | ELISPT           | IgG release | Positive            | 0         | 0         | 0         | 0          | 0          | 0         | 0         | 0         | 0         | 0         | 0         | 0         | 0         | 0         | 0         | 0         | 0         | 0             | 0    | 0   | 0         | 0    | 0    | 0 |
| 740579                                                                             | HLA-DRI1*14:02     | C            | 51    | 65  | HLA-DRI1*14:02           | 0%   | Dengue virus 2 | ELISPT           | IgG release | Positive            | 0         | 0         | 0         | 0          | 0          | 0         | 0         | 0         | 0         | 0         | 0         | 0         | 0         | 0         | 0         | 0         | 0         | 0             | 0    | 0   | 0         | 0    | 0    | 0 |
| 866092                                                                             | GPFLFLMALVLRFL     | C            | 42    | 56  | HIA-DRI1*04:01           | 0%   | Dengue virus 2 | ELISPT           | IgG release | Positive            | 0         | 0         | 0         | 0          | 0          | 0         | 0         | 0         | 0         | 0         | 0         | 0         | 0         | 0         | 0         | 0         | 0         | 0             | 0    | 0   | 0         | 0    | 0    | 0 |
| 867734                                                                             | LKFKREGIRMALNLR    | C            | 81    | 95  | HIA-DRI1*02:02           | 0%   | Dengue virus 2 | ELISPT           | IgG release | Positive            | 0         | 0         | 0         | 0          | 0          | 0         | 0         | 0         | 0         | 0         | 0         | 0         | 0         | 0         | 0         | 0         | 0         | 0             | 0    | 0   | 0         | 0    | 0    | 0 |
| 867910                                                                             | LKFKREGIRMALNLR    | C            | 81    | 95  | HIA-DRI1*02:02           | 0%   | Dengue virus 2 | ELISPT           | IgG release | Positive            | 0         | 0         | 0         | 0          | 0          | 0         | 0         | 0         | 0         | 0         | 0         | 0         | 0         | 0         | 0         | 0         | 0         | 0             | 0    | 0   | 0         | 0    | 0    | 0 |
| 867911                                                                             | LKFKREGIRMALNLR    | C            | 81    | 95  | HIA-DRI1*02:02           | 0%   | Dengue virus 2 | ELISPT           | IgG release | Positive            | 0         | 0         | 0         | 0          | 0          | 0         | 0         | 0         | 0         | 0         | 0         | 0         | 0         | 0         | 0         | 0         | 0         | 0             | 0    | 0   | 0         | 0    | 0    | 0 |
| 868074                                                                             | RLMALVLRFLTL       | C            | 45    | 59  | HIA-DRI1*04:02           | 0%   | Dengue virus 2 | ELISPT           | IgG release | Positive            | 0         | 0         | 0         | 0          | 0          | 0         | 0         | 0         | 0         | 0         | 0         | 0         | 0         | 0         | 0         | 0         | 0         | 0             | 0    | 0   | 0         | 0    | 0    | 0 |
| 150580                                                                             | HPGFLMALVLRFL      | PreM         | 244   | 258 | HIA-DRI1*15:01           | 0%   | Dengue virus 2 | ELISPT           | IgG release | Positive            | 0         | 0         | 0         | 0          | 0          | 0         | 0         | 0         | 0         | 0         | 0         | 0         | 0         | 0         | 0         | 0         | 0         | 0             | 0    | 0   | 0         | 0    | 0    | 0 |
| 180108                                                                             | HPGFLMALVLRFL      | PreM         | 121   | 135 | HLA class I              | 0%   | Dengue virus 2 | ELISPT           | IgG release | Low                 | 0         | 0         | 0         | 0          | 0          | 0         | 0         | 0         | 0         | 0         | 0         | 0         | 0         | 0         | 0         | 0         | 0         | 0             | 0    | 0   | 0         | 0    | 0    | 0 |
| 195318                                                                             | FQGLFLVLRFL        | PreM         | 263   | 277 | HIA-DRI1*07:01           | 0%   | Dengue virus 2 | ELISPT           | IgG release | Positive            | 0         | 0         | 0         | 0          | 0          | 0         | 0         | 0         | 0         | 0         | 0         | 0         | 0         | 0         | 0         | 0         | 0         | 0             | 0    | 0   | 0         | 0    | 0    | 0 |
| 195320                                                                             | FQGLFLVLRFL        | PreM         | 263   | 277 | HIA-DRI1*07:01           | 0%   | Dengue virus 2 | ELISPT           | IgG release | Positive            | 0         | 0         | 0         | 0          | 0          | 0         | 0         | 0         | 0         | 0         | 0         | 0         | 0         | 0         | 0         | 0         | 0         | 0             | 0    | 0   | 0         | 0    | 0    | 0 |
| 195322                                                                             | FQGLFLVLRFL        | PreM         | 263   | 277 | HIA-DRI1*07:01           | 0%   | Dengue virus 2 | ELISPT           | IgG release | Positive            | 0         | 0         | 0         | 0          | 0          | 0         | 0         | 0         | 0         | 0         | 0         | 0         | 0         | 0         | 0         | 0         | 0         | 0             | 0    | 0   | 0         | 0    | 0    | 0 |
| 195504                                                                             | ILVHFLVLRFL        | PreM         | 241   | 255 | HIA-DRI1*15:01           | 0%   | Dengue virus 2 | ELISPT           | IgG release | Positive            | 0         | 0         | 0         | 0          | 0          | 0         | 0         | 0         | 0         | 0         | 0         | 0         | 0         | 0         | 0         | 0         | 0         | 0             | 0    | 0   | 0         | 0    | 0    | 0 |
| 195563                                                                             | QVFLVLRFL          | PreM         | 264   | 278 | HIA-DRI1*08:02           | 0%   | Dengue virus 2 | ELISPT           | IgG release | Positive            | 0         | 0         | 0         | 0          | 0          | 0         | 0         | 0         | 0         | 0         | 0         | 0         | 0         | 0         | 0         | 0         | 0         | 0             | 0    | 0   | 0         | 0    | 0    | 0 |
| 196141                                                                             | FQGLFLVLRFL        | PreM         | 266   | 280 | HIA-DRI1*08:02           | 0%   | Dengue virus 2 | ELISPT           | IgG release | Positive            | 0         | 0         | 0         | 0          | 0          | 0         | 0         | 0         | 0         | 0         | 0         | 0         | 0         | 0         | 0         | 0         | 0         | 0             | 0    | 0   | 0         | 0    | 0    | 0 |
| 196232                                                                             | FQGLFLVLRFL        | PreM         | 262   | 276 | HIA-DRI1*07:01           | 0%   | Dengue virus 2 | ELISPT           | IgG release | Positive            | 0         | 0         | 0         | 0          | 0          | 0         | 0         | 0         | 0         | 0         | 0         | 0         | 0         | 0         | 0         | 0         | 0         | 0             | 0    | 0   | 0         | 0    | 0    | 0 |
| 538881                                                                             | FQGLFLVLRFL        | PreM         | 265   | 279 | HIA-DRI1*15:06           | 0%   | Dengue virus 2 | ELISPT           | IgG release | Positive            | 0         | 0         | 0         | 0          | 0          | 0         | 0         | 0         | 0         | 0         | 0         | 0         | 0         | 0         | 0         | 0         | 0         | 0             | 0    | 0   | 0         | 0    | 0    | 0 |
| 538850                                                                             | HPGFLMALVLRFL      | PreM         | 121   | 135 | HLA-DRI1*02:01/DB1*06:02 | 0%   | Dengue virus 2 | ELISPT           | IgG release | Positive            | 0         | 0         | 0         | 0          | 0          | 0         | 0         | 0         | 0         | 0         | 0         | 0         | 0         | 0         | 0         | 0         | 0         | 0             | 0    | 0   | 0         | 0    | 0    | 0 |
| 195793                                                                             | NLEVTIMTPHSGEE     | E            | 134   | 148 | HIA-DRI1*04:01           | 0%   | Dengue virus 2 | ELISPT           | IgG release | Positive            | 0         | 0         | 0         | 0          | 0          | 0         | 0         | 0         | 0         | 0         | 0         | 0         | 0         | 0         | 0         | 0         | 0         | 0             | 0    | 0   | 0         | 0    | 0    | 0 |
| 538427                                                                             | IKDKTLVLRFL        | E            | 112   | 126 | HIA-DRI1*04:03           | 0%   | Dengue virus 2 | ELISPT           | IgG release | Positive            | 0         | 0         | 0         | 0          | 0          | 0         | 0         | 0         | 0         | 0         | 0         | 0         | 0         | 0         | 0         | 0         | 0         | 0             | 0    | 0   | 0         | 0    | 0    | 0 |
| 538460                                                                             | KMALVLRFL          | E            | 114   | 128 | HIA-DRI1*04:03           | 0%   | Dengue virus 2 | ELISPT           | IgG release | Positive            | 0         | 0         | 0         | 0          | 0          | 0         | 0         | 0         | 0         | 0         | 0         | 0         | 0         | 0         | 0         | 0         | 0         | 0             | 0    | 0   | 0         | 0    | 0    | 0 |
| 538478                                                                             | KFLVLRFL           | E            | 114   | 128 | HIA-DRI1*14:04           | 0%   | Dengue virus 2 | ELISPT           | IgG release | Positive            | 0         | 0         | 0         | 0          | 0          | 0         | 0         | 0         | 0         | 0         | 0         | 0         | 0         | 0         | 0         | 0         | 0         | 0             | 0    | 0   | 0         | 0    | 0    | 0 |
| 538479                                                                             | KFLVLRFL           | E            | 114   | 128 | HIA-DRI1*14:04           | 0%   | Dengue virus 2 | ELISPT           | IgG release | Positive            | 0         | 0         | 0         | 0          | 0          | 0         | 0         | 0         | 0         | 0         | 0         | 0         | 0         | 0         | 0         | 0         | 0         | 0             | 0    | 0   | 0         | 0    | 0    | 0 |
| 538629                                                                             | LDTVLVLRFL         | E            | 475   | 489 | HIA-DRI1*15:06           | 0%   | Dengue virus 2 | ELISPT           | IgG release | Positive            | 0         | 0         | 0         | 0          | 0          | 0         | 0         | 0         | 0         | 0         | 0         | 0         | 0         | 0         | 0         | 0         | 0         | 0             | 0    | 0   | 0         | 0    | 0    | 0 |
| 866443                                                                             | APWGHQVLRFL        | E            | 205   | 219 | HLA-DRI1*01:02/DB1*06:01 | 0%   | Dengue virus 2 | ELISPT           | IgG release | Positive            | 0         | 0         | 0         | 0          | 0          | 0         | 0         | 0         | 0         | 0         | 0         | 0         | 0         | 0         | 0         | 0         | 0         | 0             | 0    | 0   | 0         | 0    | 0    | 0 |
| 867375                                                                             | KAMVLRFL           | E            | 204   | 218 | HLA-DRI1*01:02/DB1*06:01 | 0%   | Dengue virus 2 | ELISPT           | IgG release | Positive            | 0         | 0         | 0         | 0          | 0          | 0         | 0         | 0         | 0         | 0         | 0         | 0         | 0         | 0         | 0         | 0         | 0         | 0             | 0    | 0   | 0         | 0    | 0    | 0 |
| 866447                                                                             | PPFGQVLRFL         | E            | 371   | 385 | HLA-DRI1*01:02/DB1*06:02 | 0%   | Dengue virus 2 | ELISPT           | IgG release | Positive            | 0         | 0         | 0         | 0          | 0          | 0         | 0         | 0         | 0         | 0         | 0         | 0         | 0         | 0         | 0         | 0         | 0         | 0             | 0    | 0   | 0         | 0    | 0    | 0 |
| 739191                                                                             | HPGFLMALVLRFL      | NS1          | 868   | 882 | HIA-DRI1*14:02           | 0%   | Dengue virus 2 | ELISPT           | IgG release | Positive            | 0         | 0         | 0         | 0          | 0          | 0         | 0         | 0         | 0         | 0         | 0         | 0         | 0         | 0         | 0         | 0         | 0         | 0             | 0    | 0   | 0         | 0    | 0    | 0 |
| 866429                                                                             | GGFTVLRFL          | NS1          | 344   | 348 | HIA-DRI1*01:01           | 0%   | Dengue virus 2 | ELISPT           | IgG release | Positive            | 0         | 0         | 0         | 0          | 0          | 0         | 0         | 0         | 0         | 0         | 0         | 0         | 0         | 0         | 0         | 0         | 0         | 0             | 0    | 0   | 0         |      |      |   |











[illegible]



## CD4 DENV-3 Epitopes

| Epitope_ID | AA_Seq              | Protein_Name | Start | End  | Allele                    | step | Serotype       | Method/Technique | Assay Group  | Qualitative Measure | g strains from Mexico, (100%) |            | DENV-3 constructs of vaccines |      |     |           |        |      |
|------------|---------------------|--------------|-------|------|---------------------------|------|----------------|------------------|--------------|---------------------|-------------------------------|------------|-------------------------------|------|-----|-----------|--------|------|
|            |                     |              |       |      |                           |      |                |                  |              |                     | ACQ44481.1                    | ACQ44480.1 | TV003                         | TDEN | DPV | Dengvaxia | DENVax | TVDV |
| 195205     | CLMMMLPATLAFHLT     | C            | 104   | 118  | HLA-DRB1*15:01            | 0%   | Dengue virus 3 | ELISPOT          | IFNg release | Positive            | 0                             | 0          | 1                             | 1    | 1   | 0         | 0      | 0    |
| 195289     | FCLMMMLPATLAFHL     | C            | 103   | 117  | HLA-DRB1*01:01            | 0%   | Dengue virus 3 | ELISPOT          | IFNg release | Positive            | 0                             | 0          | 0                             | 0    | 0   | 0         | 0      | 0    |
| 195517     | INMLKRVNRVSTGP      | C            | 13    | 27   | HLA-DRB1*08:02            | 0%   | Dengue virus 3 | ELISPOT          | IFNg release | Positive            | 0                             | 0          | 0                             | 0    | 0   | 0         | 0      | 0    |
| 195519     | INMLKRVNRVSTGT      | C            | 13    | 27   | HLA-DRB1*08:02            | 0%   | Dengue virus 3 | ELISPOT          | IFNg release | Positive            | 0                             | 0          | 0                             | 0    | 0   | 0         | 0      | 0    |
| 195598     | KTSLCLVMILPAALA     | C            | 100   | 114  | HLA-DRB1*01:01            | 0%   | Dengue virus 3 | ELISPOT          | IFNg release | Positive            | 0                             | 0          | 0                             | 0    | 0   | 0         | 0      | 0    |
| 195618     | LCLMMIMPAALAFHL     | C            | 103   | 117  | HLA-DRB1*01:01            | 0%   | Dengue virus 3 | ELISPOT          | IFNg release | Positive            | 0                             | 0          | 0                             | 0    | 0   | 0         | 0      | 0    |
| 195803     | NMLKRVNRVSTGPQ      | C            | 14    | 28   | HLA-DRB1*11:01            | 0%   | Dengue virus 3 | ELISPOT          | IFNg release | Positive            | 0                             | 0          | 0                             | 0    | 0   | 0         | 0      | 0    |
| 195966     | SLCLMMIMPAALAFH     | C            | 102   | 116  | HLA-DRB1*08:02            | 0%   | Dengue virus 3 | ELISPOT          | IFNg release | Positive            | 0                             | 0          | 0                             | 0    | 0   | 0         | 0      | 0    |
| 195967     | SLCLMMMLPATLAFH     | C            | 102   | 116  | HLA-DRB1*08:02            | 0%   | Dengue virus 3 | ELISPOT          | IFNg release | Positive            | 0                             | 0          | 1                             | 1    | 1   | 0         | 0      | 0    |
| 539447     | IVNRRKTSCLMMLM      | C            | 94    | 108  | HLA-DRB1*13:01            | 0%   | Dengue virus 3 | ELISPOT          | IFNg release | Positive            | 0                             | 0          | 0                             | 0    | 0   | 0         | 0      | 0    |
| 539906     | SIINRRKRTSLCLMM     | C            | 93    | 107  | HLA-DRB1*13:01            | 0%   | Dengue virus 3 | ELISPOT          | IFNg release | Positive            | 0                             | 0          | 0                             | 0    | 0   | 0         | 0      | 0    |
| 540118     | WGSFKKSGAVKVLRG     | C            | 69    | 83   | HLA-DRB1*09:01            | 0%   | Dengue virus 3 | ELISPOT          | IFNg release | Positive            | 0                             | 0          | 0                             | 0    | 0   | 0         | 0      | 0    |
| 540119     | WGTFKKLGAIKVLKG     | C            | 69    | 83   | HLA-DRB1*09:01            | 0%   | Dengue virus 3 | ELISPOT          | IFNg release | Positive            | 0                             | 0          | 0                             | 0    | 0   | 0         | 0      | 0    |
| 540120     | WGTFKKLGAIKVLRG     | C            | 69    | 83   | HLA-DRB1*09:01            | 0%   | Dengue virus 3 | ELISPOT          | IFNg release | Positive            | 0                             | 0          | 0                             | 0    | 0   | 0         | 0      | 0    |
| 540122     | WGTFKKSGAIKVLKS     | C            | 69    | 83   | HLA-DRB1*09:01            | 0%   | Dengue virus 3 | ELISPOT          | IFNg release | Positive            | 0                             | 0          | 0                             | 0    | 0   | 0         | 0      | 0    |
| 540123     | WGTFKKSGAIKVLRG     | C            | 69    | 83   | HLA-DRB1*09:01            | 0%   | Dengue virus 3 | ELISPOT          | IFNg release | Positive            | 0                             | 0          | 1                             | 0    | 1   | 0         | 0      | 0    |
| 540124     | WGTFKKSGAIRVLRG     | C            | 69    | 83   | HLA-DRB1*09:01            | 0%   | Dengue virus 3 | ELISPOT          | IFNg release | Positive            | 0                             | 0          | 0                             | 0    | 0   | 0         | 0      | 0    |
| 591709     | LRGFKKEISNMLSII     | C            | 81    | 95   | HLA-DRB1*13:02            | 0%   | Dengue virus 3 | ELISPOT          | IFNg release | Positive            | 0                             | 0          | 1                             | 0    | 1   | 0         | 0      | 0    |
| 591723     | NMLSIIINRRKTSCLC    | C            | 90    | 104  | HLA-DRB1*11:01            | 0%   | Dengue virus 3 | ELISPOT          | IFNg release | Positive            | 0                             | 0          | 1                             | 0    | 1   | 0         | 0      | 0    |
| 591746     | RGFKKEISNMLSIIIN    | C            | 82    | 96   | HLA-DRB1*04:01            | 0%   | Dengue virus 3 | ELISPOT          | IFNg release | Positive            | 0                             | 0          | 1                             | 0    | 1   | 0         | 0      | 0    |
| 867744     | LKSFKEISNMLSII      | C            | 81    | 95   | HLA-DRB3*02:02            | 0%   | Dengue virus 3 | ELISPOT          | IFNg release | Positive            | 0                             | 0          | 0                             | 0    | 0   | 0         | 0      | 0    |
| 867909     | LRGFKKEISNMLSII     | C            | 64    | 78   | HLA-DRB3*02:02            | 0%   | Dengue virus 3 | ELISPOT          | IFNg release | Positive            | 0                             | 0          | 0                             | 0    | 0   | 0         | 0      | 0    |
| 868645     | RGLLNGQGPMLVMA      | C            | 15    | 29   | HLA-DRB3*02:02            | 0%   | Dengue virus 3 | ELISPOT          | IFNg release | Positive            | 0                             | 0          | 1                             | 1    | 1   | 0         | 0      | 0    |
| 868733     | RWGTFKKSGAIKVLK     | C            | 48    | 62   | HLA-DRB3*02:02            | 0%   | Dengue virus 3 | ELISPOT          | IFNg release | Positive            | 0                             | 0          | 1                             | 0    | 1   | 0         | 0      | 0    |
| 195968     | SLIQKVVIFILLMLV     | PreM         | 261   | 275  | HLA-DRB1*15:06            | 0%   | Dengue virus 3 | ELISPOT          | IFNg release | Positive            | 0                             | 0          | 0                             | 0    | 0   | 0         | 0      | 0    |
| 196067     | TQKVVIFVLLMLVTP     | PreM         | 263   | 277  | HLA-DRB1*15:06            | 0%   | Dengue virus 3 | ELISPOT          | IFNg release | Positive            | 0                             | 0          | 0                             | 0    | 0   | 0         | 0      | 0    |
| 539529     | KVVIFILLVTPSM       | PreM         | 265   | 279  | HLA-DRB1*15:06            | 0%   | Dengue virus 3 | ELISPOT          | IFNg release | Positive            | 0                             | 0          | 0                             | 1    | 0   | 0         | 0      | 0    |
| 539808     | QKVIVFTLLMLVTPS     | PreM         | 264   | 278  | HLA-DRB1*15:06            | 0%   | Dengue virus 3 | ELISPOT          | IFNg release | Positive            | 0                             | 0          | 0                             | 0    | 0   | 0         | 0      | 0    |
| 119134     | EGKVVQYENLYTVI      | E            | 126   | 140  | HLA-DR2                   | 0%   | Dengue virus 3 | ELISPOT          | IFNg release | Positive            | 0                             | 0          | 0                             | 0    | 0   | 0         | 0      | 0    |
| 196170     | VQHENLYTVIITH       | E            | 130   | 144  | HLA-DRB1*07:01            | 0%   | Dengue virus 3 | ELISPOT          | IFNg release | Positive            | 0                             | 0          | 1                             | 1    | 1   | 1         | 1      | 1    |
| 539400     | IEGKVVQYENLYTVI     | E            | 405   | 419  | HLA-DRB1*15:02            | 0%   | Dengue virus 3 | ELISPOT          | IFNg release | Positive            | 0                             | 0          | 0                             | 0    | 0   | 0         | 0      | 0    |
| 539476     | KKELLVTFKNAHAKK     | E            | 511   | 525  | HLA-DRB1*14:04            | 0%   | Dengue virus 3 | ELISPOT          | IFNg release | Positive            | 0                             | 0          | 1                             | 0    | 1   | 0         | 0      | 0    |
| 539559     | LGKMWVHQIFGSAYTA    | E            | 710   | 724  | HLA-DRB1*04:03            | 0%   | Dengue virus 3 | ELISPOT          | IFNg release | Positive            | 0                             | 0          | 1                             | 1    | 1   | 1         | 1      | 1    |
| 539856     | RKELLITFKNAHAKK     | E            | 511   | 525  | HLA-DRB1*04:03            | 0%   | Dengue virus 3 | ELISPOT          | IFNg release | Positive            | 0                             | 0          | 0                             | 0    | 0   | 0         | 0      | 0    |
| 591605     | AFVLKKEVSETQHGT     | E            | 303   | 317  | HLA-DRB1*04:01            | 0%   | Dengue virus 3 | ELISPOT          | IFNg release | Positive            | 0                             | 0          | 1                             | 0    | 1   | 0         | 0      | 0    |
| 591719     | NEMILLTMKNRAWMV     | E            | 474   | 488  | HLA-DRB1*11:01            | 0%   | Dengue virus 3 | ELISPOT          | IFNg release | Positive            | 0                             | 0          | 0                             | 0    | 0   | 0         | 0      | 0    |
| 739011     | GGVLNSLGMVHQIF      | E            | 704   | 718  | HLA-DRB1*11:04            | 0%   | Dengue virus 3 | ELISPOT          | IFNg release | Positive            | 0                             | 0          | 1                             | 1    | 1   | 1         | 1      | 1    |
| 739344     | KMVHQIFGSAYTALF     | E            | 31    | 45   | HLA-DRB3*02:02            | 0%   | Dengue virus 3 | ELISPOT          | IFNg release | Positive            | 0                             | 0          | 1                             | 1    | 1   | 1         | 1      | 1    |
| 866574     | EIQNSGGTSIFAGHL     | E            | 547   | 561  | HLA-DQA1*01:02/QQB1*06:02 | 0%   | Dengue virus 3 | ELISPOT          | IFNg release | Positive            | 0                             | 0          | 0                             | 1    | 0   | 1         | 0      | 0    |
| 867374     | KAWIVHRQWFFDLPL     | E            | 482   | 496  | HLA-DQA1*01:01/QQB1*05:01 | 0%   | Dengue virus 3 | ELISPOT          | IFNg release | Positive            | 0                             | 0          | 0                             | 0    | 0   | 0         | 0      | 0    |
| 869693     | WMVHRQWLFDLPLW      | E            | 87    | 101  | HLA-DQA1*01:01/QQB1*05:01 | 0%   | Dengue virus 3 | ELISPOT          | IFNg release | Positive            | 0                             | 0          | 0                             | 0    | 0   | 0         | 0      | 0    |
| 195577     | KLTVVVDGTIGVLEQ     | NS1          | 858   | 872  | HLA-DRB1*03:01            | 0%   | Dengue virus 3 | ELISPOT          | IFNg release | Positive            | 0                             | 0          | 0                             | 0    | 0   | 0         | 0      | 0    |
| 539070     | AKIVTAETRNSSFII     | NS1          | 121   | 135  | HLA-DRB1*13:01            | 0%   | Dengue virus 3 | ELISPOT          | IFNg release | Positive            | 0                             | 0          | 0                             | 0    | 0   | 0         | 0      | 0    |
| 539457     | KAKIVIAETQNSSFII    | NS1          | 893   | 907  | HLA-DRB1*13:01            | 0%   | Dengue virus 3 | ELISPOT          | IFNg release | Positive            | 0                             | 0          | 0                             | 0    | 0   | 0         | 0      | 0    |
| 866698     | FGVFTTNIVLKL RDV    | NS1          | 933   | 947  | HLA-DPB1*04:01            | 0%   | Dengue virus 3 | ELISPOT          | IFNg release | Positive            | 0                             | 0          | 0                             | 0    | 0   | 0         | 0      | 0    |
| 167810     | RENLLGVGLAMATTLQLPE | NS2a         | 1224  | 1243 | HLA-DP                    | 0%   | Dengue virus 3 | ELISPOT          | IFNg release | Positive            | 0                             | 0          | 1                             | 0    | 1   | 0         | 0      | 0    |
| 195125     | AGVIFTFVLLSGQI      | NS2a         | 1159  | 1173 | HLA-DRB1*07:01            | 0%   | Dengue virus 3 | ELISPOT          | IFNg release | Positive            | 0                             | 0          | 0                             | 0    | 0   | 0         | 0      | 0    |
| 195128     | AGVLFMFVLLSGQI      | NS2a         | 1159  | 1173 | HLA-DRB1*07:01            | 0%   | Dengue virus 3 | ELISPOT          | IFNg release | Positive            | 0                             | 0          | 0                             | 0    | 0   | 0         | 0      | 0    |
| 195133     | AHTFIMIGSNASDRM     | NS2a         | 1179  | 1193 | HLA-DRB1*04:01            | 0%   | Dengue virus 3 | ELISPOT          | IFNg release | Positive            | 0                             | 0          | 0                             | 0    | 0   | 0         | 0      | 0    |
| 195166     | ANTFIMIGSNASDRM     | NS2a         | 1179  | 1193 | HLA-DRB1*04:01            | 0%   | Dengue virus 3 | ELISPOT          | IFNg release | Positive            | 0                             | 0          | 0                             | 0    | 0   | 0         | 0      | 0    |
| 195433     | GVLFVLLSGQIT        | NS2a         | 1160  | 1174 | HLA-DRB1*15:06            | 0%   | Dengue virus 3 | ELISPOT          | IFNg release | Positive            | 0                             | 0          | 1                             | 0    | 1   | 0         | 0      | 0    |
| 195456     | HMIAGILFMFVLLLS     | NS2a         | 1156  | 1170 | HLA-DRB1*11:01            | 0%   | Dengue virus 3 | ELISPOT          | IFNg release | Positive            | 0                             | 0          | 0                             | 0    | 0   | 0         | 0      | 0    |
| 195630     | LFTFVLLSGQITWR      | NS2a         | 1162  | 1176 | HLA-DRB1*07:01            | 0%   | Dengue virus 3 | ELISPOT          | IFNg release | Positive            | 0                             | 0          | 1                             | 0    | 1   | 0         | 0      | 0    |
| 195734     | LVSLTCSNTILTLTV     | NS2a         | 1274  | 1288 | HLA-DRB1*07:01            | 0%   | Dengue virus 3 | ELISPOT          | IFNg release | Positive            | 0                             | 0          | 0                             | 0    | 0   | 0         | 0      | 0    |
| 195740     | LWTALVSLTCSNTIF     | NS2a         | 1270  | 1284 | HLA-DRB1*07:01            | 0%   | Dengue virus 3 | ELISPOT          | IFNg release | Positive            | 0                             | 0          | 0                             | 1    | 0   | 0         | 0      | 0    |
| 196123     | VGVLFTFVLLSGQI      | NS2a         | 1159  | 1173 | HLA-DRB1*07:01            | 0%   | Dengue virus 3 | ELISPOT          | IFNg release | Positive            | 0                             | 0          | 0                             | 0    | 0   | 0         | 0      | 0    |
| 539802     | QFETYQLWTALVSLT     | NS2a         | 1264  | 1278 | HLA-DRB1*15:02            | 0%   | Dengue virus 3 | ELISPOT          | IFNg release | Positive            | 0                             | 0          | 0                             | 1    | 0   | 0         | 0      | 0    |
| 540048     | VLFTFVLLSGQITWR     | NS2a         | 1161  | 1175 | HLA-DRB1*09:01            | 0%   | Dengue virus 3 | ELISPOT          | IFNg release | Positive            | 0                             | 0          | 1                             | 0    | 1   | 0         | 0      | 0    |
| 865959     | AGALFTFVLLSGQI      | NS2a         | 1159  | 1173 | HLA-DPB1*04:02            | 0%   | Dengue virus 3 | ELISPOT          | IFNg release | Positive            | 0                             | 0          | 0                             | 0    | 0   | 0         | 0      | 0    |



|         |                 |      |      |      |                           |      |                |             |              |              |   |   |   |   |   |   |   |   |
|---------|-----------------|------|------|------|---------------------------|------|----------------|-------------|--------------|--------------|---|---|---|---|---|---|---|---|
| 867702  | LIATFKIQPFLTLGF | NS2a | 1202 | 1216 | HLA-DRB1*01:01            | 0%   | Dengue virus 3 | ELISPOT     | IFNg release | Positive     | 0 | 0 | 0 | 0 | 0 | 0 | 0 | 0 |
| 868109  | MIAGVITFVLLLSG  | NS2a | 1157 | 1171 | HLA-DRB1*04:02            | 0%   | Dengue virus 3 | ELISPOT     | IFNg release | Positive     | 0 | 0 | 0 | 0 | 0 | 0 | 0 | 0 |
| 869592  | VQPFLLAGFFLRKLT | NS2a | 1208 | 1222 | HLA-DRB1*01:01            | 0%   | Dengue virus 3 | ELISPOT     | IFNg release | Positive     | 0 | 0 | 0 | 0 | 0 | 0 | 0 | 0 |
| 739173  | IGLVSILASSLLRND | NS2b | 1354 | 1368 | HLA-DRB1*11:04            | 0%   | Dengue virus 3 | ELISPOT     | IFNg release | Positive     | 0 | 0 | 0 | 0 | 0 | 0 | 0 | 0 |
| 21420   | GNEWITDFVGKTVWF | NS3  | 31   | 45   | HLA-DRB1*15:01            | 0%   | Dengue virus 3 | ICS         | IFNg release | Positive     | 0 | 0 | 0 | 1 | 0 | 0 | 0 | 0 |
| 49767   | PTRVVAAMEEAMKG  | NS3  | 1697 | 1711 | HLA-DRB1*15:01            | 0%   | Dengue virus 3 | ICS         | IFNg release | Positive     | 0 | 0 | 0 | 0 | 0 | 0 | 0 | 0 |
| 539432  | IREAIKRRRLTLILA | NS3  | 1682 | 1696 | HLA-DRB1*08:03            | 0%   | Dengue virus 3 | ELISPOT     | IFNg release | Positive     | 0 | 0 | 0 | 0 | 0 | 0 | 0 | 0 |
| 539777  | PKNFQTMPGIFQTT  | NS3  | 1579 | 1593 | HLA-DRB1*04:03            | 0%   | Dengue virus 3 | ELISPOT     | IFNg release | Positive     | 0 | 0 | 1 | 1 | 1 | 0 | 0 | 0 |
| 540037  | VGKTVWFVPSIKAGN | NS3  | 1829 | 1843 | HLA-DRB1*08:03            | 0%   | Dengue virus 3 | ELISPOT     | IFNg release | Positive     | 0 | 0 | 0 | 1 | 0 | 0 | 0 | 0 |
| 72654   | WITDFVGKTVWF    | NS3  | 1824 | 1834 | HLA-DR15                  | 0%   | Dengue virus 3 | 51 chromium | cytotoxicity | Positive     | 0 | 0 | 0 | 1 | 0 | 0 | 0 | 0 |
| 869278  | TMWVHVRGAVLTHNG | NS3  | 1521 | 1535 | HLA-DQA1*05:01/DQB1*02:01 | 0%   | Dengue virus 3 | ELISPOT     | IFNg release | Positive     | 0 | 0 | 1 | 1 | 1 | 0 | 0 | 0 |
| 195199  | AYVIGILTAAIVA   | NS4a | 2227 | 2241 | HLA-DRB1*01:01            | 0%   | Dengue virus 3 | ELISPOT     | IFNg release | Positive     | 0 | 0 | 1 | 1 | 1 | 0 | 0 | 0 |
| 195742  | MADVPLQWIASAIVL | NS4a | 2189 | 2203 | HLA-DRB1*07:01            | 0%   | Dengue virus 3 | ELISPOT     | IFNg release | Positive     | 0 | 0 | 1 | 1 | 1 | 0 | 0 | 0 |
| 196168  | VPLQWIASAIVLEFF | NS4a | 2192 | 2206 | HLA-DRB1*01:01            | 0%   | Dengue virus 3 | ELISPOT     | IFNg release | Positive     | 0 | 0 | 1 | 1 | 1 | 0 | 0 | 0 |
| 539900  | SGMLWMADVPLQWIA | NS4a | 2184 | 2198 | HLA-DRB1*04:03            | 0%   | Dengue virus 3 | ELISPOT     | IFNg release | Positive     | 0 | 0 | 1 | 1 | 1 | 0 | 0 | 0 |
| 739020  | GIGKTSIGLICVIVS | NS4a | 2169 | 2183 | HLA-DRB1*11:04            | 0%   | Dengue virus 3 | ELISPOT     | IFNg release | Positive     | 0 | 0 | 0 | 0 | 0 | 0 | 0 | 0 |
| 867986  | LTLTAAVLLATHYA  | NS4b | 2347 | 2361 | HLA-DQA1*01:02/DQB1*06:02 | 0%   | Dengue virus 3 | ELISPOT     | IFNg release | Positive     | 0 | 0 | 0 | 1 | 0 | 0 | 0 | 0 |
| 869526  | VLLLVTHYAIIGPL  | NS4b | 2353 | 2367 | HLA-DRB1*02:01            | 0%   | Dengue virus 3 | ELISPOT     | IFNg release | Positive     | 0 | 0 | 1 | 0 | 1 | 0 | 0 | 0 |
| 195410  | GNIVSSVNMVSRLL  | NS5  | 2715 | 2729 | HLA-DRB1*03:01            | 0%   | Dengue virus 3 | ELISPOT     | IFNg release | Positive     | 0 | 0 | 1 | 1 | 1 | 0 | 0 | 0 |
| 195437  | GYLRDISKIPGGAM  | NS5  | 43   | 57   | HLA-DRB1*08:02            | 0%   | Dengue virus 3 | ELISPOT     | IFNg release | Positive     | 0 | 0 | 1 | 1 | 1 | 0 | 0 | 0 |
| 195641  | LHKLGYLRLDISKIP | NS5  | 39   | 53   | HLA-DRB1*03:01            | 0%   | Dengue virus 3 | ELISPOT     | IFNg release | Positive     | 0 | 0 | 1 | 1 | 1 | 0 | 0 | 0 |
| 195780  | NEDHWFSDRNSYSVG | NS5  | 2982 | 2996 | HLA-DRB1*04:01            | 0%   | Dengue virus 3 | ELISPOT     | IFNg release | Positive     | 0 | 0 | 0 | 0 | 0 | 0 | 0 | 0 |
| 195812  | NRFTMTTHRRPTIEK | NS5  | 18   | 32   | HLA-DRB1*11:01            | 0%   | Dengue virus 3 | ELISPOT     | IFNg release | Positive     | 0 | 0 | 1 | 1 | 1 | 0 | 0 | 0 |
| 196041  | TGNIVSSVNMVSRLL | NS5  | 2714 | 2728 | HLA-DRB1*04:01            | 0%   | Dengue virus 3 | ELISPOT     | IFNg release | Positive     | 0 | 0 | 1 | 1 | 1 | 0 | 0 | 0 |
| 196222  | WNIVKLMGKDVFLY  | NS5  | 2611 | 2625 | HLA-DRB1*15:01            | 0%   | Dengue virus 3 | ELISPOT     | IFNg release | Positive     | 0 | 0 | 1 | 1 | 1 | 0 | 0 | 0 |
| 196239  | YQNKVVVKVRPTPGK | NS5  | 3062 | 3076 | HLA-DRB1*08:02            | 0%   | Dengue virus 3 | ELISPOT     | IFNg release | Positive     | 0 | 0 | 1 | 1 | 1 | 0 | 0 | 0 |
| 32944   | KPWDVVPVTV      | NS5  | 2819 | 2827 | HLA class II              | 0%   | Dengue virus 3 | ELISA       | IL-2 release | Positive     | 0 | 0 | 0 | 0 | 0 | 0 | 0 | 0 |
| 539449  | IVSSVNMVSRLLNLR | NS5  | 2717 | 2731 | HLA-DRB1*11:04            | 0%   | Dengue virus 3 | ELISPOT     | IFNg release | Positive     | 0 | 0 | 1 | 1 | 1 | 0 | 0 | 0 |
| 539604  | LNTFTNMEAQLVRQM | NS5  | 3098 | 3112 | HLA-DRB1*10:01            | 0%   | Dengue virus 3 | ELISPOT     | IFNg release | Positive     | 0 | 0 | 0 | 1 | 0 | 0 | 0 | 0 |
| 539739  | NMEVQLVRQMEGEGV | NS5  | 3103 | 3117 | HLA-DRB1*13:01            | 0%   | Dengue virus 3 | ELISPOT     | IFNg release | Positive     | 0 | 0 | 0 | 0 | 0 | 0 | 0 | 0 |
| 540019  | TYGLNTFTNMEAQLV | NS5  | 3095 | 3109 | HLA-DRB1*04:03            | 0%   | Dengue virus 3 | ELISPOT     | IFNg release | Positive     | 0 | 0 | 0 | 1 | 0 | 0 | 0 | 0 |
| 540090  | VSSVNMVSRLLNRF  | NS5  | 2718 | 2732 | HLA-DRB1*14:04            | 0%   | Dengue virus 3 | ELISPOT     | IFNg release | Positive     | 0 | 0 | 1 | 1 | 1 | 0 | 0 | 0 |
| 591602  | ACLGKAYAQMWTLMY | NS5  | 3242 | 3256 | HLA-DRB1*04:01            | 0%   | Dengue virus 3 | ELISPOT     | IFNg release | Positive     | 0 | 0 | 1 | 0 | 1 | 0 | 0 | 0 |
| 740771  | YGLNTFTNMEVQLVR | NS5  | 3096 | 3110 | HLA-DRB1*04:07            | 0%   | Dengue virus 3 | ELISPOT     | IFNg release | Positive     | 0 | 0 | 0 | 0 | 0 | 0 | 0 | 0 |
| 868338  | PMSTYGNIVKMLMSG | NS5  | 2605 | 2619 | HLA-DQA1*01:01/DQB1*05:01 | 0%   | Dengue virus 3 | ELISPOT     | IFNg release | Positive     | 0 | 0 | 1 | 1 | 1 | 0 | 0 | 0 |
| 1068391 | TGKPSINMLKVRNR  | C    | 8    | 22   | HLA-DRB1*11:01            | 100% | Dengue virus 3 | ELISPOT     | IFNg release | Positive-Low | 1 | 1 | 1 | 1 | 1 | 0 | 0 | 0 |
| 195303  | FKKEISNMLSIINKR | C    | 37   | 51   | HLA-DRB1*04:01            | 100% | Dengue virus 3 | ELISPOT     | IFNg release | Positive     | 1 | 1 | 0 | 1 | 0 | 0 | 0 | 0 |
| 195306  | FLRFLAIPPTAGVLA | C    | 6    | 20   | HLA-DRB1*01:01            | 100% | Dengue virus 3 | ELISPOT     | IFNg release | Positive     | 1 | 1 | 1 | 1 | 1 | 0 | 0 | 0 |
| 195469  | IAFLRLAIPPTAGV  | C    | 4    | 18   | HLA-DRB1*04:01            | 100% | Dengue virus 3 | ELISPOT     | IFNg release | Positive     | 1 | 1 | 1 | 1 | 1 | 0 | 0 | 0 |
| 195497  | IKVLKGFKKEISNML | C    | 31   | 45   | HLA-DRB1*04:01            | 100% | Dengue virus 3 | ELISPOT     | IFNg release | Positive     | 1 | 1 | 0 | 1 | 0 | 0 | 0 | 0 |
| 195518  | INMLKVRNRVSTGS  | C    | 13   | 27   | HLA-DRB1*08:02            | 100% | Dengue virus 3 | ELISPOT     | IFNg release | Positive     | 1 | 1 | 1 | 1 | 1 | 0 | 0 | 0 |
| 195536  | ISNMLSIINKRKKT  | C    | 41   | 55   | HLA-DRB1*11:01            | 100% | Dengue virus 3 | ELISPOT     | IFNg release | Positive     | 1 | 1 | 0 | 1 | 0 | 0 | 0 | 0 |
| 195559  | KEISNMLSIINKRKK | C    | 39   | 53   | HLA-DRB1*04:01            | 100% | Dengue virus 3 | ELISPOT     | IFNg release | Positive     | 1 | 1 | 0 | 1 | 0 | 0 | 0 | 0 |
| 195597  | KTSLCLMMILPAALA | C    | 53   | 67   | HLA-DRB1*01:01            | 100% | Dengue virus 3 | ELISPOT     | IFNg release | Positive     | 1 | 1 | 0 | 0 | 0 | 0 | 0 | 0 |
| 195611  | LARWGTFFKSGAIVK | C    | 19   | 33   | HLA-DRB1*07:01            | 100% | Dengue virus 3 | ELISPOT     | IFNg release | Positive     | 1 | 1 | 1 | 1 | 1 | 0 | 0 | 0 |
| 195649  | LKGFKKEISNMLSII | C    | 34   | 48   | HLA-DRB1*07:01            | 100% | Dengue virus 3 | ELISPOT     | IFNg release | Positive     | 1 | 1 | 0 | 1 | 0 | 0 | 0 | 0 |
| 195961  | SINMLKVRNRVSTG  | C    | 12   | 26   | HLA-DRB1*08:02            | 100% | Dengue virus 3 | ELISPOT     | IFNg release | Positive     | 1 | 1 | 1 | 1 | 1 | 0 | 0 | 0 |
| 36858   | LKGFKKEISNML    | C    | 81   | 92   | HLA-DPw4                  | 100% | Dengue virus 3 | ICS         | IFNg release | Positive     | 1 | 1 | 0 | 1 | 0 | 0 | 0 | 0 |
| 539277  | GAIVLKGFKKEISN  | C    | 29   | 43   | HLA-DRB1*12:02            | 100% | Dengue virus 3 | ELISPOT     | IFNg release | Positive     | 1 | 1 | 0 | 1 | 0 | 0 | 0 | 0 |
| 539502  | KPSINMLKVRNRVSV | C    | 10   | 24   | HLA-DRB1*08:03            | 100% | Dengue virus 3 | ELISPOT     | IFNg release | Positive     | 1 | 1 | 1 | 1 | 1 | 0 | 0 | 0 |
| 539512  | KSGAIVLKGFKKEI  | C    | 27   | 41   | HLA-DRB1*12:02            | 100% | Dengue virus 3 | ELISPOT     | IFNg release | Positive     | 1 | 1 | 0 | 1 | 0 | 0 | 0 | 0 |
| 539787  | PSINMLKVRNRVST  | C    | 11   | 25   | HLA-DRB1*14:04            | 100% | Dengue virus 3 | ELISPOT     | IFNg release | Positive     | 1 | 1 | 1 | 1 | 1 | 0 | 0 | 0 |
| 539897  | SGAIVLKGFKKEIS  | C    | 28   | 42   | HLA-DRB1*14:04            | 100% | Dengue virus 3 | ELISPOT     | IFNg release | Positive     | 1 | 1 | 0 | 1 | 0 | 0 | 0 | 0 |
| 539926  | SNMLSIINKRKKTSL | C    | 42   | 56   | HLA-DRB1*12:02            | 100% | Dengue virus 3 | ELISPOT     | IFNg release | Positive     | 1 | 1 | 0 | 1 | 0 | 0 | 0 | 0 |
| 540121  | WGTFFKSGAIVLKG  | C    | 22   | 36   | HLA-DRB1*09:01            | 100% | Dengue virus 3 | ELISPOT     | IFNg release | Positive     | 1 | 1 | 0 | 1 | 0 | 0 | 0 | 0 |
| 738443  | AFRLFLAIPPTAGVL | C    | 52   | 66   | HLA-DRB1*04:07            | 100% | Dengue virus 3 | ELISPOT     | IFNg release | Positive     | 1 | 1 | 1 | 1 | 1 | 0 | 0 | 0 |
| 740207  | RWGTFFKSGAIVLKG | C    | 68   | 82   | HLA-DRB1*14:02            | 100% | Dengue virus 3 | ELISPOT     | IFNg release | Positive     | 1 | 1 | 0 | 1 | 0 | 0 | 0 | 0 |
| 195602  | KVIFILLMLVTPSM  | PreM | 265  | 279  | HLA-DRB1*01:01            | 100% | Dengue virus 3 | ELISPOT     | IFNg release | Positive     | 1 | 1 | 1 | 0 | 1 | 1 | 1 | 1 |
| 195726  | LTOQKVIFILLMLVT | PreM | 262  | 276  | HLA-DRB1*11:01            | 100% | Dengue virus 3 | ELISPOT     | IFNg release | Positive     | 1 | 1 | 1 | 0 | 1 | 1 | 1 | 1 |
| 195830  | PGFTILALFLAHYIG | PreM | 245  | 259  | HLA-DRB1*15:06            | 100% | Dengue virus 3 | ELISPOT     | IFNg release | Positive     | 1 | 1 | 1 | 1 | 1 | 1 | 1 | 1 |
| 196203  | VVIFILLMLVTPSMT | PreM | 266  | 280  | HLA-DRB1*07:01            | 100% | Dengue virus 3 | ELISPOT     | IFNg release | Positive     | 1 | 1 | 1 | 0 | 1 | 0 | 1 | 1 |
| 540004  | TSLTQKVIFILLML  | PreM | 260  | 274  | HLA-DRB1*04:02            | 100% | Dengue virus 3 | ELISPOT     | IFNg release | Positive     | 1 | 1 | 1 | 0 | 1 | 1 | 1 | 1 |
| 867082  | HPGFTILALFLAHYI | PreM | 244  | 258  | HLA-DRB1*02:01            | 100% | Dengue virus 3 | ELISPOT     | IFNg release | Positive     | 1 | 1 | 1 | 1 | 1 | 1 | 1 | 1 |
| 869302  | TQKVIFILLMLVTP  | PreM | 263  | 277  | HLA-DRB1*04:02            | 100% | Dengue virus 3 | ELISPOT     | IFNg release | Positive     | 1 | 1 | 1 | 0 | 1 | 1 | 1 | 1 |



|        |                      |      |      |      |                           |      |                |         |              |          |   |   |   |   |   |   |   |   |
|--------|----------------------|------|------|------|---------------------------|------|----------------|---------|--------------|----------|---|---|---|---|---|---|---|---|
| 119289 | NGRLITANPVVTKKE      | E    | 626  | 640  | HLA-DRB1*08:02            | 100% | Dengue virus 3 | ELISPOT | IFNg release | Positive | 1 | 1 | 1 | 1 | 1 | 1 | 1 | 1 |
| 119327 | RKELLVTFKNAHAKK      | E    | 231  | 245  | HLA-DR2                   | 100% | Dengue virus 3 | ELISPOT | IFNg release | Positive | 1 | 1 | 0 | 1 | 0 | 1 | 1 | 1 |
| 13376  | EMILLTMKNKAWMVH      | E    | 473  | 487  | HLA-DRB1*13:01            | 100% | Dengue virus 3 | ELISPOT | IFNg release | Positive | 1 | 1 | 1 | 1 | 1 | 1 | 0 | 1 |
| 195215 | DFNEMILLTMKNKAW      | E    | 470  | 484  | HLA-DRB1*14:04            | 100% | Dengue virus 3 | ELISPOT | IFNg release | Positive | 1 | 1 | 1 | 1 | 1 | 1 | 0 | 1 |
| 195252 | ELLVTFKNAHAKKOE      | E    | 513  | 527  | HLA-DRB1*04:01            | 100% | Dengue virus 3 | ELISPOT | IFNg release | Positive | 1 | 1 | 1 | 1 | 1 | 1 | 1 | 1 |
| 195341 | FVLKKEVSETQHGTI      | E    | 584  | 598  | HLA-DRB1*04:01            | 100% | Dengue virus 3 | ELISPOT | IFNg release | Positive | 1 | 1 | 1 | 1 | 1 | 1 | 1 | 1 |
| 195365 | GHLKCRMKDKLELK       | E    | 559  | 573  | HLA-DRB1*03:01            | 100% | Dengue virus 3 | ELISPOT | IFNg release | Positive | 1 | 1 | 1 | 1 | 1 | 1 | 1 | 0 |
| 195416 | GRLITANPVVTKKEE      | E    | 627  | 641  | HLA-DRB1*08:02            | 100% | Dengue virus 3 | ELISPOT | IFNg release | Positive | 1 | 1 | 1 | 1 | 1 | 1 | 1 | 1 |
| 195813 | NRKELLVTFKNAHAK      | E    | 510  | 524  | HLA-DRB1*04:01            | 100% | Dengue virus 3 | ELISPOT | IFNg release | Positive | 1 | 1 | 0 | 1 | 0 | 1 | 1 | 1 |
| 196033 | TFVLKKEVSETQHGT      | E    | 583  | 597  | HLA-DRB1*04:01            | 100% | Dengue virus 3 | ELISPOT | IFNg release | Positive | 1 | 1 | 0 | 1 | 0 | 1 | 0 | 1 |
| 196172 | VQYENLKYYTIVTVH      | E    | 410  | 424  | HLA-DRB1*07:01            | 100% | Dengue virus 3 | ELISPOT | IFNg release | Positive | 1 | 1 | 0 | 0 | 0 | 0 | 0 | 0 |
| 539460 | KELLVTFKNAHAKKQ      | E    | 512  | 526  | HLA-DRB1*08:03            | 100% | Dengue virus 3 | ELISPOT | IFNg release | Positive | 1 | 1 | 1 | 1 | 1 | 1 | 1 | 1 |
| 539710 | NEMILLTMKNKAWMV      | E    | 472  | 486  | HLA-DRB1*04:03            | 100% | Dengue virus 3 | ELISPOT | IFNg release | Positive | 1 | 1 | 1 | 1 | 1 | 1 | 0 | 1 |
| 739041 | GMSYAMCTNTFVLKK      | E    | 574  | 588  | HLA-DRB1*04:07            | 100% | Dengue virus 3 | ELISPOT | IFNg release | Positive | 1 | 1 | 0 | 0 | 0 | 0 | 0 | 0 |
| 740409 | SVGGVLNSLGKMMVHQ     | E    | 702  | 716  | HLA-DRB1*11:04            | 100% | Dengue virus 3 | ELISPOT | IFNg release | Positive | 1 | 1 | 1 | 1 | 1 | 1 | 1 | 1 |
| 741746 | MRCVGVGNRDFVEGLSGATW | E    | 281  | 300  | HLA class II              | 100% | Dengue virus 3 | ELISPOT | IFNg release | Positive | 1 | 1 | 1 | 1 | 1 | 1 | 1 | 1 |
| 867377 | KCRMKMDKLELKGM5      | E    | 562  | 576  | HLA-DRB3*02:02            | 100% | Dengue virus 3 | ELISPOT | IFNg release | Positive | 1 | 1 | 1 | 1 | 1 | 1 | 1 | 0 |
| 868175 | MVHRQWFFDLPLPWT      | E    | 485  | 499  | HLA-DQA1*01:01/DOB1*05:01 | 100% | Dengue virus 3 | ELISPOT | IFNg release | Positive | 1 | 1 | 1 | 1 | 1 | 1 | 1 | 1 |
| 190705 | AKIVTAETQNSFFII      | NS1  | 894  | 908  | HLA-DRB1*04:01            | 100% | Dengue virus 3 | ELISPOT | IFNg release | Positive | 1 | 1 | 1 | 1 | 1 | 0 | 0 | 0 |
| 190823 | KLTVVVGDIIGVLEQ      | NS1  | 85   | 99   | HLA-DR2                   | 100% | Dengue virus 3 | ELISPOT | IFNg release | Positive | 1 | 1 | 1 | 1 | 1 | 0 | 0 | 0 |
| 190825 | KQJANELNYILWENN      | NS1  | 69   | 83   | HLA-DR2                   | 100% | Dengue virus 3 | ELISPOT | IFNg release | Positive | 1 | 1 | 1 | 1 | 1 | 0 | 0 | 0 |
| 190996 | TEQYKFQADSPKRLA      | NS1  | 802  | 816  | HLA-DRB5*01:01            | 100% | Dengue virus 3 | ELISPOT | IFNg release | Positive | 1 | 1 | 1 | 1 | 1 | 0 | 0 | 0 |
| 195164 | ANELNYILWENNIK       | NS1  | 845  | 859  | HLA-DRB1*03:01            | 100% | Dengue virus 3 | ELISPOT | IFNg release | Positive | 1 | 1 | 1 | 1 | 1 | 0 | 0 | 0 |
| 195419 | GSWKLEKASLIEVKT      | NS1  | 981  | 995  | HLA-DRB1*01:01            | 100% | Dengue virus 3 | ELISPOT | IFNg release | Positive | 1 | 1 | 1 | 1 | 1 | 0 | 0 | 0 |
| 195692 | LNLYLWENNKLTVV       | NS1  | 848  | 862  | HLA-DRB1*03:01            | 100% | Dengue virus 3 | ELISPOT | IFNg release | Positive | 1 | 1 | 1 | 1 | 1 | 0 | 0 | 0 |
| 195782 | NELNYLWENNKL         | NS1  | 846  | 860  | HLA-DRB1*03:01            | 100% | Dengue virus 3 | ELISPOT | IFNg release | Positive | 1 | 1 | 1 | 1 | 1 | 0 | 0 | 0 |
| 196235 | YKFQADSPKRLATAI      | NS1  | 805  | 819  | HLA-DRB1*03:01            | 100% | Dengue virus 3 | ELISPOT | IFNg release | Positive | 1 | 1 | 1 | 1 | 1 | 0 | 0 | 0 |
| 539717 | NGSWKLEKASLIEVK      | NS1  | 980  | 994  | HLA-DRB1*09:01            | 100% | Dengue virus 3 | ELISPOT | IFNg release | Positive | 1 | 1 | 1 | 1 | 1 | 0 | 0 | 0 |
| 539825 | QYKFQADSPKRLATA      | NS1  | 804  | 818  | HLA-DRB3*02:02            | 100% | Dengue virus 3 | ELISPOT | IFNg release | Positive | 1 | 1 | 1 | 1 | 1 | 0 | 0 | 0 |
| 866700 | FGVFTTNWLKLEKREV     | NS1  | 933  | 947  | HLA-DPB1*01:01            | 100% | Dengue virus 3 | ELISPOT | IFNg release | Positive | 1 | 1 | 0 | 0 | 0 | 0 | 0 | 0 |
| 867042 | HADMGWYIESOKNGS      | NS1  | 968  | 982  | HLA-DQA1*01:01/DOB1*05:01 | 100% | Dengue virus 3 | ELISPOT | IFNg release | Positive | 1 | 1 | 1 | 1 | 1 | 0 | 0 | 0 |
| 195134 | AHTLIMIGSNASDRM      | NS2a | 1179 | 1193 | HLA-DRB1*04:01            | 100% | Dengue virus 3 | ELISPOT | IFNg release | Positive | 1 | 1 | 1 | 1 | 1 | 0 | 0 | 0 |
| 195197 | AWRTATLILAGVSL       | NS2a | 1289 | 1303 | HLA-DRB1*01:01            | 100% | Dengue virus 3 | ELISPOT | IFNg release | Positive | 1 | 1 | 0 | 1 | 0 | 0 | 0 | 0 |
| 195222 | DMAHTLIMIGSNASD      | NS2a | 1177 | 1191 | HLA-DRB1*04:01            | 100% | Dengue virus 3 | ELISPOT | IFNg release | Positive | 1 | 1 | 1 | 1 | 1 | 0 | 0 | 0 |
| 195335 | FTFVLLSGQITWRD       | NS2a | 1163 | 1177 | HLA-DRB1*15:02            | 100% | Dengue virus 3 | ELISPOT | IFNg release | Positive | 1 | 1 | 1 | 0 | 1 | 0 | 0 | 0 |
| 195337 | FTLVAVWRTATLILA      | NS2a | 1284 | 1298 | HLA-DRB1*07:01            | 100% | Dengue virus 3 | ELISPOT | IFNg release | Positive | 1 | 1 | 1 | 1 | 1 | 0 | 0 | 0 |
| 195342 | FVLLSGQITWRDMA       | NS2a | 1165 | 1179 | HLA-DRB1*01:01            | 100% | Dengue virus 3 | ELISPOT | IFNg release | Positive | 1 | 1 | 1 | 0 | 1 | 0 | 0 | 0 |
| 195429 | GVFTFVLLSGQIT        | NS2a | 1160 | 1174 | HLA-DRB1*04:01            | 100% | Dengue virus 3 | ELISPOT | IFNg release | Positive | 1 | 1 | 0 | 0 | 0 | 0 | 0 | 0 |
| 195462 | HTLIMIGSNASDRMG      | NS2a | 1180 | 1194 | HLA-DRB1*04:01            | 100% | Dengue virus 3 | ELISPOT | IFNg release | Positive | 1 | 1 | 1 | 1 | 1 | 0 | 0 | 0 |
| 195481 | IFTLTVAWRTATIL       | NS2a | 1283 | 1297 | HLA-DRB1*07:01            | 100% | Dengue virus 3 | ELISPOT | IFNg release | Positive | 1 | 1 | 1 | 1 | 1 | 0 | 0 | 0 |
| 195609 | LALGFLLRKLTSEN       | NS2a | 1212 | 1226 | HLA-DRB1*11:01            | 100% | Dengue virus 3 | ELISPOT | IFNg release | Positive | 1 | 1 | 1 | 1 | 1 | 0 | 0 | 0 |
| 195632 | LGFFLLRKLTSENLL      | NS2a | 1214 | 1228 | HLA-DRB1*11:01            | 100% | Dengue virus 3 | ELISPOT | IFNg release | Positive | 1 | 1 | 1 | 0 | 1 | 0 | 0 | 0 |
| 195644 | LIMIGSNASDRMGMG      | NS2a | 1182 | 1196 | HLA-DRB1*04:01            | 100% | Dengue virus 3 | ELISPOT | IFNg release | Positive | 1 | 1 | 1 | 1 | 1 | 0 | 0 | 0 |
| 195645 | LISLTCSTNIFTLTV      | NS2a | 1274 | 1288 | HLA-DRB1*07:01            | 100% | Dengue virus 3 | ELISPOT | IFNg release | Positive | 1 | 1 | 0 | 0 | 0 | 0 | 0 | 0 |
| 195729 | LTVAWRTATLILAGV      | NS2a | 1286 | 1300 | HLA-DPB1*04:02            | 100% | Dengue virus 3 | ELISPOT | IFNg release | Positive | 1 | 1 | 0 | 0 | 1 | 0 | 0 | 0 |
| 195743 | MAHTLIMIGSNASDR      | NS2a | 1178 | 1192 | HLA-DRB1*04:01            | 100% | Dengue virus 3 | ELISPOT | IFNg release | Positive | 1 | 1 | 1 | 1 | 1 | 0 | 0 | 0 |
| 195757 | MGVTVLALIAFKIQ       | NS2a | 1195 | 1209 | HLA-DRB1*07:01            | 100% | Dengue virus 3 | ELISPOT | IFNg release | Positive | 1 | 1 | 1 | 1 | 1 | 0 | 0 | 0 |
| 195819 | NTIFTLTVAWRTATIL     | NS2a | 1281 | 1295 | HLA-DRB1*07:01            | 100% | Dengue virus 3 | ELISPOT | IFNg release | Positive | 1 | 1 | 1 | 1 | 1 | 0 | 0 | 0 |
| 195836 | PLFIFSLDKTLKRS       | NS2a | 1330 | 1344 | HLA-DRB1*11:01            | 100% | Dengue virus 3 | ELISPOT | IFNg release | Positive | 1 | 1 | 1 | 1 | 1 | 0 | 0 | 0 |
| 195912 | RTATLILAGVSLLPV      | NS2a | 1291 | 1305 | HLA-DRB1*03:01            | 100% | Dengue virus 3 | ELISPOT | IFNg release | Positive | 1 | 1 | 0 | 1 | 0 | 0 | 0 | 0 |
| 539075 | ALGFFLLRKLTSEN       | NS2a | 1213 | 1227 | HLA-DRB1*12:02            | 100% | Dengue virus 3 | ELISPOT | IFNg release | Positive | 1 | 1 | 1 | 0 | 1 | 0 | 0 | 0 |
| 539370 | GVTVLALIAFKIQ        | NS2a | 1196 | 1210 | HLA-DRB1*10:01            | 100% | Dengue virus 3 | ELISPOT | IFNg release | Positive | 1 | 1 | 1 | 1 | 1 | 0 | 0 | 0 |
| 539429 | IQPFLALGFFLRKLT      | NS2a | 1208 | 1222 | HLA-DRB1*15:06            | 100% | Dengue virus 3 | ELISPOT | IFNg release | Positive | 1 | 1 | 1 | 1 | 1 | 0 | 0 | 0 |
| 539568 | LIATFKIQPFLALGF      | NS2a | 1202 | 1216 | HLA-DRB1*15:06            | 100% | Dengue virus 3 | ELISPOT | IFNg release | Positive | 1 | 1 | 1 | 1 | 1 | 0 | 0 | 0 |
| 540093 | VTVLALIAFKIQ         | NS2a | 1197 | 1211 | HLA-DRB1*04:03            | 100% | Dengue virus 3 | ELISPOT | IFNg release | Positive | 1 | 1 | 1 | 1 | 1 | 0 | 0 | 0 |
| 867442 | KLITQFETYQLWTAL      | NS2a | 1260 | 1274 | HLA-DPB1*02:01            | 100% | Dengue virus 3 | ELISPOT | IFNg release | Positive | 1 | 1 | 1 | 1 | 1 | 0 | 0 | 0 |
| 867551 | LALIAFKIQPFLAL       | NS2a | 1200 | 1214 | HLA-DPB1*04:01            | 100% | Dengue virus 3 | ELISPOT | IFNg release | Positive | 1 | 1 | 1 | 1 | 1 | 0 | 0 | 0 |
| 868046 | MALKLITQFETYQLW      | NS2a | 1257 | 1271 | HLA-DPB1*01:01            | 100% | Dengue virus 3 | ELISPOT | IFNg release | Positive | 1 | 1 | 1 | 1 | 1 | 0 | 0 | 0 |
| 868303 | PFLALGFFLRKLT        | NS2a | 1210 | 1224 | HLA-DPB1*01:01            | 100% | Dengue virus 3 | ELISPOT | IFNg release | Positive | 1 | 1 | 1 | 1 | 1 | 0 | 0 | 0 |
| 868329 | PLPLFIFSLDKTLKR      | NS2a | 1328 | 1342 | HLA-DPB1*01:01            | 100% | Dengue virus 3 | ELISPOT | IFNg release | Positive | 1 | 1 | 1 | 1 | 1 | 0 | 0 | 0 |
| 868551 | QPFLALGFFLRKLT       | NS2a | 1209 | 1223 | HLA-DPB1*02:01            | 100% | Dengue virus 3 | ELISPOT | IFNg release | Positive | 1 | 1 | 1 | 1 | 1 | 0 | 0 | 0 |
| 869256 | TLTVAWRTATLILAG      | NS2a | 1285 | 1299 | HLA-DPB1*04:02            | 100% | Dengue virus 3 | ELISPOT | IFNg release | Positive | 1 | 1 | 1 | 1 | 1 | 0 | 0 | 0 |
| 869298 | TQFETYQLWTALISL      | NS2a | 1263 | 1277 | HLA-DPB1*04:02            | 100% | Dengue virus 3 | ELISPOT | IFNg release | Positive | 1 | 1 | 0 | 0 | 0 | 0 | 0 | 0 |
| 167823 | TMRIKDDTENILTVLLKTA  | NS2b | 83   | 102  | HLA-DRB1*15:01            | 100% | Dengue virus 3 | ELISPOT | IFNg release | Positive | 1 | 1 | 1 | 1 | 1 | 0 | 0 | 0 |



|         |                     |      |      |      |                           |      |                |                   |                     |          |   |   |   |   |   |   |   |   |
|---------|---------------------|------|------|------|---------------------------|------|----------------|-------------------|---------------------|----------|---|---|---|---|---|---|---|---|
| 195180  | ASSLLRNDVPMAGPL     | NS2b | 1361 | 1375 | HLA-DRB1*03:01            | 100% | Dengue virus 3 | ELISPOT           | IFNg release        | Positive | 1 | 1 | 1 | 1 | 1 | 0 | 0 | 0 |
| 195403  | GLVSILASSLLRNDV     | NS2b | 1355 | 1369 | HLA-DRB1*01:01            | 100% | Dengue virus 3 | ELISPOT           | IFNg release        | Positive | 1 | 1 | 1 | 1 | 1 | 0 | 0 | 0 |
| 195789  | NILTLLKALLIV        | NS2b | 1436 | 1450 | HLA-DRB1*01:01            | 100% | Dengue virus 3 | ELISPOT           | IFNg release        | Positive | 1 | 1 | 1 | 1 | 1 | 0 | 0 | 0 |
| 195994  | SSLLRNDVPMAGPLV     | NS2b | 1362 | 1376 | HLA-DRB1*03:01            | 100% | Dengue virus 3 | ELISPOT           | IFNg release        | Positive | 1 | 1 | 1 | 1 | 1 | 0 | 0 | 0 |
| 196152  | VMAVGLVSILASSLL     | NS2b | 1351 | 1365 | HLA-DRB1*07:01            | 100% | Dengue virus 3 | ELISPOT           | IFNg release        | Positive | 1 | 1 | 1 | 1 | 1 | 0 | 0 | 0 |
| 539100  | AVGLVSILASSLLRN     | NS2b | 1353 | 1367 | HLA-DRB1*10:01            | 100% | Dengue virus 3 | ELISPOT           | IFNg release        | Positive | 1 | 1 | 1 | 1 | 1 | 0 | 0 | 0 |
| 540087  | VSGIFPYSIPATLLV     | NS2b | 1449 | 1463 | HLA-DRB1*09:01            | 100% | Dengue virus 3 | ELISPOT           | IFNg release        | Positive | 1 | 1 | 1 | 1 | 1 | 0 | 0 | 0 |
| 1067120 | GKVVGLYNGVGVTKN     | NS3  | 1617 | 1631 | HLA-DRB1*15:01            | 100% | Dengue virus 3 | ELISPOT           | IFNg release        | Positive | 1 | 1 | 0 | 1 | 0 | 0 | 0 | 0 |
| 150544  | RLRTLILAPTRVVA      | NS3  | 1688 | 1702 | HLA-DRB1*01:01            | 100% | Dengue virus 3 | ELISPOT           | IFNg release        | Positive | 1 | 1 | 1 | 1 | 1 | 0 | 0 | 0 |
| 150617  | TFTMRLSPVRVPNY      | NS3  | 1738 | 1752 | HLA-DRB1*01:01            | 100% | Dengue virus 3 | ELISPOT           | IFNg release        | Positive | 1 | 1 | 1 | 1 | 1 | 0 | 0 | 0 |
| 190307  | REIVDLMCHATF        | NS3  | 255  | 266  | HLA-DPA1*01:03/DPB1*02:01 | 100% | Dengue virus 3 | ELISA             | IL-2 release        | Positive | 1 | 1 | 1 | 1 | 1 | 0 | 0 | 0 |
| 190710  | ANCLRKNGKKVQLS      | NS3  | 1846 | 1860 | HLA-DRB1*13:01            | 100% | Dengue virus 3 | ELISPOT           | IFNg release        | Positive | 1 | 1 | 1 | 1 | 1 | 0 | 0 | 0 |
| 190732  | EAAAFMTATPPGTA      | NS3  | 1782 | 1796 | HLA-DRB1*04:03            | 100% | Dengue virus 3 | ELISPOT           | IFNg release        | Positive | 1 | 1 | 1 | 1 | 1 | 0 | 0 | 0 |
| 190774  | GKTVWFVPSIKAGND     | NS3  | 357  | 371  | HLA-DR2                   | 100% | Dengue virus 3 | ELISPOT           | IFNg release        | Positive | 1 | 1 | 1 | 1 | 1 | 0 | 0 | 0 |
| 195144  | AIVREAIKRLRTL       | NS3  | 1680 | 1694 | HLA-DRB1*08:02            | 100% | Dengue virus 3 | ELISPOT           | IFNg release        | Positive | 1 | 1 | 1 | 1 | 1 | 0 | 0 | 0 |
| 195243  | EGKVGLYNGGVVTK      | NS3  | 5    | 19   | HLA-DRB1*15:01            | 100% | Dengue virus 3 | ELISPOT           | IFNg release        | Positive | 1 | 1 | 0 | 1 | 0 | 0 | 0 | 0 |
| 195297  | FHTMWHVTRGAVLTY     | NS3  | 1519 | 1533 | HLA-DRB1*07:01            | 100% | Dengue virus 3 | ELISPOT           | IFNg release        | Positive | 1 | 1 | 0 | 0 | 0 | 0 | 0 | 0 |
| 195430  | GVFHTMWHVTRGAVL     | NS3  | 1517 | 1531 | HLA-DRB1*07:01            | 100% | Dengue virus 3 | ELISPOT           | IFNg release        | Positive | 1 | 1 | 1 | 1 | 1 | 0 | 0 | 0 |
| 195898  | RLRTLILAPTRVVA      | NS3  | 1689 | 1703 | HLA-DRB1*04:03            | 100% | Dengue virus 3 | ELISPOT           | IFNg release        | Positive | 1 | 1 | 1 | 1 | 1 | 0 | 0 | 0 |
| 28422   | IRYQTATK            | NS3  | 241  | 249  | HLA-DR15                  | 100% | Dengue virus 3 | 51 chromium       | cytotoxicity        | Positive | 1 | 1 | 1 | 1 | 1 | 0 | 0 | 0 |
| 30395   | KEGEKKLRPRWLDA      | NS3  | 585  | 599  | HLA class II              | 100% | Dengue virus 3 | ICS               | IFNg release        | Positive | 1 | 1 | 1 | 1 | 1 | 0 | 0 | 0 |
| 38401   | LPAIVREAIKRLRT      | NS3  | 1678 | 1692 | HLA-DRB3*02:02            | 100% | Dengue virus 3 | ELISPOT           | IFNg release        | Positive | 1 | 1 | 1 | 1 | 1 | 0 | 0 | 0 |
| 39      | AAAFMTATPPGTA       | NS3  | 1783 | 1797 | HLA-DRB1*04:03            | 100% | Dengue virus 3 | ELISPOT           | IFNg release        | Positive | 1 | 1 | 1 | 1 | 1 | 0 | 0 | 0 |
| 45670   | NREGKVGLYNGGVV      | NS3  | 141  | 155  | HLA-DRB1*15:01            | 100% | Dengue virus 3 | multimer/tetramer | qualitative binding | Positive | 1 | 1 | 0 | 1 | 0 | 0 | 0 | 0 |
| 539028  | AAAFMTATPPGTADA     | NS3  | 1784 | 1798 | HLA-DRB1*10:01            | 100% | Dengue virus 3 | ELISPOT           | IFNg release        | Positive | 1 | 1 | 1 | 1 | 1 | 0 | 0 | 0 |
| 539052  | AGKTVWFVPSIKAGN     | NS3  | 1829 | 1843 | HLA-DRB1*08:03            | 100% | Dengue virus 3 | ELISPOT           | IFNg release        | Positive | 1 | 1 | 0 | 1 | 0 | 0 | 0 | 0 |
| 539578  | LKGLPIRYQTATKS      | NS3  | 1709 | 1723 | HLA-DRB1*13:01            | 100% | Dengue virus 3 | ELISPOT           | IFNg release        | Positive | 1 | 1 | 1 | 1 | 1 | 0 | 0 | 0 |
| 539607  | LPIRYQTATKSEHT      | NS3  | 1712 | 1726 | HLA-DRB1*13:01            | 100% | Dengue virus 3 | ELISPOT           | IFNg release        | Positive | 1 | 1 | 1 | 1 | 1 | 0 | 0 | 0 |
| 539714  | NGKKVIQLSRKTFDT     | NS3  | 1852 | 1866 | HLA-DRB1*12:02            | 100% | Dengue virus 3 | ELISPOT           | IFNg release        | Positive | 1 | 1 | 1 | 1 | 1 | 0 | 0 | 0 |
| 539838  | REAIKRLRTLILAP      | NS3  | 1683 | 1697 | HLA-DRB1*14:04            | 100% | Dengue virus 3 | ELISPOT           | IFNg release        | Positive | 1 | 1 | 1 | 1 | 1 | 0 | 0 | 0 |
| 539844  | REGKVGLYNGGVV       | NS3  | 1615 | 1629 | HLA-DRB1*01:02            | 100% | Dengue virus 3 | ELISPOT           | IFNg release        | Positive | 1 | 1 | 0 | 1 | 0 | 0 | 0 | 0 |
| 539991  | TMRLSPVRVPNYNL      | NS3  | 1740 | 1754 | HLA-DRB1*13:01            | 100% | Dengue virus 3 | ELISPOT           | IFNg release        | Positive | 1 | 1 | 1 | 1 | 1 | 0 | 0 | 0 |
| 540039  | VGLYNGVVTKNNGGY     | NS3  | 9    | 23   | HLA-DRB1*15:06            | 100% | Dengue virus 3 | ELISPOT           | IFNg release        | Positive | 1 | 1 | 0 | 1 | 0 | 0 | 0 | 0 |
| 54455   | RKYLPAIVRE          | NS3  | 202  | 211  | HLA-DR15                  | 100% | Dengue virus 3 | 51 chromium       | cytotoxicity        | Positive | 1 | 1 | 1 | 1 | 1 | 0 | 0 | 0 |
| 55024   | RNLTIMDLHPGSGKT     | NS3  | 187  | 201  | HLA class II              | 100% | Dengue virus 3 | ICS               | IFNg release        | Positive | 1 | 1 | 1 | 1 | 1 | 0 | 0 | 0 |
| 66127   | TRVVAAMEEA          | NS3  | 225  | 235  | HLA-DR15                  | 100% | Dengue virus 3 | 51 chromium       | cytotoxicity        | Positive | 1 | 1 | 1 | 1 | 1 | 0 | 0 | 0 |
| 68015   | VDLMCHATFT          | NS3  | 258  | 267  | HLA-DPw2                  | 100% | Dengue virus 3 | 51 chromium       | cytotoxicity        | Positive | 1 | 1 | 1 | 1 | 1 | 0 | 0 | 0 |
| 70708   | VREAIKRLRTLILA      | NS3  | 1682 | 1696 | HLA-DRB1*12:02            | 100% | Dengue virus 3 | ELISPOT           | IFNg release        | Positive | 1 | 1 | 1 | 1 | 1 | 0 | 0 | 0 |
| 866771  | FQTTTGEIGAIALDF     | NS3  | 1589 | 1603 | HLA-DQA1*03:01/DQB1*03:02 | 100% | Dengue virus 3 | ELISPOT           | IFNg release        | Positive | 1 | 1 | 1 | 1 | 1 | 0 | 0 | 0 |
| 867106  | HTMWHVTRGAVLTYN     | NS3  | 1520 | 1534 | HLA-DQA1*05:01/DQB1*02:01 | 100% | Dengue virus 3 | ELISPOT           | IFNg release        | Positive | 1 | 1 | 0 | 0 | 0 | 0 | 0 | 0 |
| 867358  | IVREAIKRLRTLIL      | NS3  | 1681 | 1695 | HLA-DRB3*02:02            | 100% | Dengue virus 3 | ELISPOT           | IFNg release        | Positive | 1 | 1 | 1 | 1 | 1 | 0 | 0 | 0 |
| 867534  | KYLPAIVREAIKRL      | NS3  | 1676 | 1690 | HLA-DRB4*01:01            | 100% | Dengue virus 3 | ELISPOT           | IFNg release        | Positive | 1 | 1 | 1 | 1 | 1 | 0 | 0 | 0 |
| 867875  | LNDWDFVTTDISEM      | NS3  | 1873 | 1887 | HLA-DQA1*03:01/DQB1*03:02 | 100% | Dengue virus 3 | ELISPOT           | IFNg release        | Positive | 1 | 1 | 1 | 1 | 1 | 0 | 0 | 0 |
| 869689  | WHVTRGAVLTYNGKR     | NS3  | 1523 | 1537 | HLA-DQA1*05:01/DQB1*02:01 | 100% | Dengue virus 3 | ELISPOT           | IFNg release        | Positive | 1 | 1 | 0 | 0 | 0 | 0 | 0 | 0 |
| 167755  | IALDLVTEIGRVPSHLAHT | NS4a | 2    | 21   | HLA class II              | 100% | Dengue virus 3 | ELISPOT           | IFNg release        | Positive | 1 | 1 | 1 | 1 | 1 | 0 | 0 | 0 |
| 195522  | IPLQWIASAIVLEFF     | NS4a | 2192 | 2206 | HLA-DRB1*01:01            | 100% | Dengue virus 3 | ELISPOT           | IFNg release        | Positive | 1 | 1 | 0 | 0 | 0 | 0 | 0 | 0 |
| 195828  | PETMETLLLLGLMIL     | NS4a | 2141 | 2155 | HLA-DRB1*15:06            | 100% | Dengue virus 3 | ELISPOT           | IFNg release        | Positive | 1 | 1 | 1 | 1 | 1 | 0 | 0 | 0 |
| 196056  | TLLLGLMILLTGA       | NS4a | 2146 | 2160 | HLA-DRB1*15:06            | 100% | Dengue virus 3 | ELISPOT           | IFNg release        | Positive | 1 | 1 | 1 | 1 | 1 | 0 | 0 | 0 |
| 739464  | LFISGKGIGKTSIG      | NS4a | 2162 | 2176 | HLA-DRB1*01:02            | 100% | Dengue virus 3 | ELISPOT           | IFNg release        | Positive | 1 | 1 | 1 | 1 | 1 | 0 | 0 | 0 |
| 869474  | VIGILTAAIAANE       | NS4a | 2230 | 2244 | HLA-DQA1*01:02/DQB1*06:02 | 100% | Dengue virus 3 | ELISPOT           | IFNg release        | Positive | 1 | 1 | 0 | 0 | 0 | 0 | 0 | 0 |
| 195346  | GAGLAFSIMKSVGTG     | NS4b | 2474 | 2488 | HLA-DRB1*04:01            | 100% | Dengue virus 3 | ELISPOT           | IFNg release        | Positive | 1 | 1 | 1 | 1 | 1 | 0 | 0 | 0 |
| 195607  | LAFSIMKSVGTGKRG     | NS4b | 2477 | 2491 | HLA-DRB1*04:01            | 100% | Dengue virus 3 | ELISPOT           | IFNg release        | Positive | 1 | 1 | 1 | 1 | 1 | 0 | 0 | 0 |
| 195617  | LCAVQLLMRTSWAL      | NS4b | 2418 | 2432 | HLA-DRB1*15:01            | 100% | Dengue virus 3 | ELISPOT           | IFNg release        | Positive | 1 | 1 | 0 | 1 | 0 | 0 | 0 | 0 |
| 195624  | LDPVIYDSKFEQLG      | NS4b | 2397 | 2411 | HLA-DRB1*03:01            | 100% | Dengue virus 3 | ELISPOT           | IFNg release        | Positive | 1 | 1 | 1 | 1 | 1 | 0 | 0 | 0 |
| 195663  | LLLITHYAIIGPLG      | NS4b | 2354 | 2368 | HLA-DRB1*07:01            | 100% | Dengue virus 3 | ELISPOT           | IFNg release        | Positive | 1 | 1 | 0 | 0 | 0 | 0 | 0 | 0 |
| 195664  | LLLMRTSWALCEAL      | NS4b | 2423 | 2437 | HLA-DRB1*04:01            | 100% | Dengue virus 3 | ELISPOT           | IFNg release        | Positive | 1 | 1 | 0 | 1 | 0 | 0 | 0 | 0 |
| 195807  | NPLTLTAAVLLITH      | NS4b | 2345 | 2359 | HLA-DRB1*07:01            | 100% | Dengue virus 3 | ELISPOT           | IFNg release        | Positive | 1 | 1 | 0 | 0 | 0 | 0 | 0 | 0 |
| 195871  | QVMLLVCAVQLLLM      | NS4b | 2412 | 2426 | HLA-DRB1*01:01            | 100% | Dengue virus 3 | ELISPOT           | IFNg release        | Positive | 1 | 1 | 1 | 1 | 1 | 0 | 0 | 0 |
| 196023  | TAAVLLLITHYAIIG     | NS4b | 2350 | 2364 | HLA-DRB1*15:01            | 100% | Dengue virus 3 | ELISPOT           | IFNg release        | Positive | 1 | 1 | 0 | 0 | 0 | 0 | 0 | 0 |
| 196137  | VLCVQLLMRTSWA       | NS4b | 2417 | 2431 | HLA-DRB1*12:02            | 100% | Dengue virus 3 | ELISPOT           | IFNg release        | Positive | 1 | 1 | 1 | 1 | 1 | 0 | 0 | 0 |
| 196155  | VMLLVCAVQLLLMR      | NS4b | 2413 | 2427 | HLA-DRB1*03:01            | 100% | Dengue virus 3 | ELISPOT           | IFNg release        | Positive | 1 | 1 | 1 | 1 | 1 | 0 | 0 | 0 |
| 196163  | VNPLTLTAAVLLIT      | NS4b | 2344 | 2358 | HLA-DRB1*01:01            | 100% | Dengue virus 3 | ELISPOT           | IFNg release        | Positive | 1 | 1 | 0 | 0 | 0 | 0 | 0 | 0 |
| 738453  | AGLAFSIMKSVGTGK     | NS4b | 2475 | 2489 | HLA-DRB1*04:07            | 100% | Dengue virus 3 | ELISPOT           | IFNg release        | Positive | 1 | 1 | 1 | 1 | 1 | 0 | 0 | 0 |
| 868878  | SLAAIANQAVVLMGL     | NS4b | 2306 | 2320 | HLA-DQA1*01:02/DQB1*06:02 | 100% | Dengue virus 3 | ELISPOT           | IFNg release        | Positive | 1 | 1 | 1 | 1 | 1 | 0 | 0 | 0 |



|        |                      |      |      |      |                           |           |                |         |              |          |   |   |   |   |   |   |   |   |
|--------|----------------------|------|------|------|---------------------------|-----------|----------------|---------|--------------|----------|---|---|---|---|---|---|---|---|
| 167753 | HVNAEPETPNMDVIGERIKR | NS5  | 263  | 282  | HLA class II              | 100%      | Dengue virus 3 | ELISPOT | IFNg release | Positive | 1 | 1 | 0 | 1 | 0 | 0 | 0 | 0 |
| 167769 | KKLNQLSRKEFDL        | NS5  | 15   | 27   | HLA-DP                    | 100%      | Dengue virus 3 | ELISPOT | IFNg release | Positive | 1 | 1 | 0 | 1 | 0 | 0 | 0 | 0 |
| 195136 | AIFKLTQNKVVKVQ       | NS5  | 3056 | 3070 | HLA-DRB1*09:01            | 100%      | Dengue virus 3 | ELISPOT | IFNg release | Positive | 1 | 1 | 1 | 1 | 1 | 0 | 0 | 0 |
| 195204 | CLGKAYAQMWLSLMYF     | NS5  | 3243 | 3257 | HLA-DRB1*04:01            | 100%      | Dengue virus 3 | ELISPOT | IFNg release | Positive | 1 | 1 | 0 | 1 | 0 | 0 | 0 | 0 |
| 195273 | ETKGVERLKRMAISG      | NS5  | 3138 | 3152 | HLA-DRB1*11:01            | 100%      | Dengue virus 3 | ELISPOT | IFNg release | Positive | 1 | 1 | 1 | 1 | 1 | 0 | 0 | 0 |
| 195382 | GKVRKDIPQWQPSKG      | NS5  | 3175 | 3189 | HLA-DRB1*03:01            | 100%      | Dengue virus 3 | ELISPOT | IFNg release | Positive | 1 | 1 | 1 | 1 | 1 | 0 | 0 | 0 |
| 195408 | GNIVASVNMVSRLL       | NS5  | 3    | 17   | HLA-DRB1*03:01            | 100%      | Dengue virus 3 | ELISPOT | IFNg release | Positive | 1 | 1 | 0 | 0 | 0 | 0 | 0 | 0 |
| 195568 | KHGGMLVRNPLSRNS      | NS5  | 2689 | 2703 | HLA-DRB1*08:02            | 100%      | Dengue virus 3 | ELISPOT | IFNg release | Positive | 1 | 1 | 1 | 1 | 1 | 0 | 0 | 0 |
| 195668 | LLNRFMTTHRPTIE       | NS5  | 16   | 30   | HLA-DRB1*11:01            | 100%      | Dengue virus 3 | ELISPOT | IFNg release | Positive | 1 | 1 | 1 | 1 | 1 | 0 | 0 | 0 |
| 195779 | NDMGKVRKDIPQWQP      | NS5  | 3172 | 3186 | HLA-DRB1*03:01            | 100%      | Dengue virus 3 | ELISPOT | IFNg release | Positive | 1 | 1 | 1 | 1 | 1 | 0 | 0 | 0 |
| 195806 | NMVSRLLLNRFMTM       | NS5  | 2722 | 2736 | HLA-DRB1*08:02            | 100%      | Dengue virus 3 | ELISPOT | IFNg release | Positive | 1 | 1 | 1 | 1 | 1 | 0 | 0 | 0 |
| 195875 | RAIWYMWLGARYLEF      | NS5  | 2961 | 2975 | HLA-DRB1*01:01            | 100%      | Dengue virus 3 | ELISPOT | IFNg release | Positive | 1 | 1 | 1 | 1 | 1 | 0 | 0 | 0 |
| 195939 | SCVYNMMGKREKKG       | NS5  | 2938 | 2952 | HLA-DRB1*11:01            | 100%      | Dengue virus 3 | ELISPOT | IFNg release | Positive | 1 | 1 | 1 | 1 | 1 | 0 | 0 | 0 |
| 196038 | TGNIVASVNMVSRLL      | NS5  | 2    | 16   | HLA-DRB1*04:01            | 100%      | Dengue virus 3 | ELISPOT | IFNg release | Positive | 1 | 1 | 0 | 0 | 0 | 0 | 0 | 0 |
| 196162 | VNMVSRLLNRFMTM       | NS5  | 9    | 23   | HLA-DRB1*11:01            | 100%      | Dengue virus 3 | ELISPOT | IFNg release | Positive | 1 | 1 | 1 | 1 | 1 | 0 | 0 | 0 |
| 196221 | WLWRTLGRNKKPRLC      | NS5  | 157  | 171  | HLA-DRB1*14:02            | 100%      | Dengue virus 3 | ELISPOT | IFNg release | Positive | 1 | 1 | 0 | 0 | 0 | 0 | 0 | 0 |
| 196224 | WSLMYFHRRDLRLAS      | NS5  | 3252 | 3266 | HLA-DRB1*03:01            | 100%      | Dengue virus 3 | ELISPOT | IFNg release | Positive | 1 | 1 | 0 | 1 | 0 | 0 | 0 | 0 |
| 231420 | RYLEFALGFLNEDH       | NS5  | 2971 | 2985 | HLA-DPB1*04:01            | 100%      | Dengue virus 3 | ELISPOT | IFNg release | Positive | 1 | 1 | 1 | 0 | 1 | 0 | 0 | 0 |
| 539444 | IVASVNMVSRLLNLR      | NS5  | 2717 | 2731 | HLA-DRB1*12:02            | 100%      | Dengue virus 3 | ELISPOT | IFNg release | Positive | 1 | 1 | 0 | 0 | 0 | 0 | 0 | 0 |
| 539458 | KCGSCVYNMMGKREK      | NS5  | 2935 | 2949 | HLA-DRB1*13:01            | 100%      | Dengue virus 3 | ELISPOT | IFNg release | Positive | 1 | 1 | 1 | 1 | 1 | 0 | 0 | 0 |
| 539600 | LMYFHRRDLRLASNA      | NS5  | 3254 | 3268 | HLA-DRB1*13:01            | 100%      | Dengue virus 3 | ELISPOT | IFNg release | Positive | 1 | 1 | 1 | 1 | 1 | 0 | 0 | 0 |
| 539704 | NAIFKLTQNKVVKV       | NS5  | 3055 | 3069 | HLA-DRB1*09:01            | 100%      | Dengue virus 3 | ELISPOT | IFNg release | Positive | 1 | 1 | 1 | 1 | 1 | 0 | 0 | 0 |
| 539726 | NIVASVNMVSRLLN       | NS5  | 2716 | 2730 | HLA-DRB1*15:06            | 100%      | Dengue virus 3 | ELISPOT | IFNg release | Positive | 1 | 1 | 0 | 0 | 0 | 0 | 0 | 0 |
| 539831 | RATWAQNIPTAIQQV      | NS5  | 3346 | 3360 | HLA-DRB1*09:01            | 100%      | Dengue virus 3 | ELISPOT | IFNg release | Positive | 1 | 1 | 0 | 0 | 0 | 0 | 0 | 0 |
| 539872 | RRDLRLASNAICSAV      | NS5  | 3259 | 3273 | HLA-DRB1*04:03            | 100%      | Dengue virus 3 | ELISPOT | IFNg release | Positive | 1 | 1 | 1 | 1 | 1 | 0 | 0 | 0 |
| 539916 | SLMYFHRRDLRLASN      | NS5  | 3253 | 3267 | HLA-DRB1*13:01            | 100%      | Dengue virus 3 | ELISPOT | IFNg release | Positive | 1 | 1 | 0 | 1 | 0 | 0 | 0 | 0 |
| 539945 | SVNMVSRLLNRFMTM      | NS5  | 2720 | 2734 | HLA-DRB1*12:02            | 100%      | Dengue virus 3 | ELISPOT | IFNg release | Positive | 1 | 1 | 1 | 1 | 1 | 0 | 0 | 0 |
| 540025 | VASVNMVSRLLNRF       | NS5  | 2718 | 2732 | HLA-DRB1*14:04            | 100%      | Dengue virus 3 | ELISPOT | IFNg release | Positive | 1 | 1 | 0 | 0 | 0 | 0 | 0 | 0 |
| 540152 | YKTWAYHGSYEVKAT      | NS5  | 2789 | 2803 | HLA-DRB1*09:01            | 100%      | Dengue virus 3 | ELISPOT | IFNg release | Positive | 1 | 1 | 1 | 1 | 1 | 0 | 0 | 0 |
| 738537 | ASVNMVSRLLNRF        | NS5  | 7    | 21   | HLA-DRB1*14:06            | 100%      | Dengue virus 3 | ELISPOT | IFNg release | Positive | 1 | 1 | 0 | 0 | 0 | 0 | 0 | 0 |
| 738753 | EEFLDYMPMSMKRFRK     | NS5  | 3367 | 3381 | HLA-DRB1*14:02            | 100%      | Dengue virus 3 | ELISPOT | IFNg release | Positive | 1 | 1 | 1 | 0 | 1 | 0 | 0 | 0 |
| 738759 | EFLDYMPMSMKRFRKE     | NS5  | 3368 | 3382 | HLA-DRB1*14:06            | 100%      | Dengue virus 3 | ELISPOT | IFNg release | Positive | 1 | 1 | 1 | 0 | 1 | 0 | 0 | 0 |
| 738829 | ERELHKLKCGSCVY       | NS5  | 2927 | 2941 | HLA-DRB1*11:04            | 100%      | Dengue virus 3 | ELISPOT | IFNg release | Positive | 1 | 1 | 1 | 1 | 1 | 0 | 0 | 0 |
| 857703 | IWYMWLGGARYLEFA      | NS5  | 2963 | 2977 | HLA-DPB1*04:01            | 100%      | Dengue virus 3 | ELISPOT | IFNg release | Positive | 1 | 1 | 1 | 1 | 1 | 0 | 0 | 0 |
| 866168 | ARYLEFALGFLNED       | NS5  | 2970 | 2984 | HLA-DQA1*03:01/DQB1*03:02 | 100%      | Dengue virus 3 | ELISPOT | IFNg release | Positive | 1 | 1 | 1 | 0 | 1 | 0 | 0 | 0 |
| 867015 | GSCVYNMMGKREKLL      | NS5  | 2937 | 2951 | HLA-DRB5*01:01            | 100%      | Dengue virus 3 | ELISPOT | IFNg release | Positive | 1 | 1 | 1 | 1 | 1 | 0 | 0 | 0 |
| 867376 | KAYAQMWWSLMYFHRR     | NS5  | 3246 | 3260 | HLA-DRB5*01:01            | 100%      | Dengue virus 3 | ELISPOT | IFNg release | Positive | 1 | 1 | 0 | 1 | 0 | 0 | 0 | 0 |
| 868748 | SAKLQWFVERNMVIP      | NS5  | 2549 | 2563 | HLA-DQA1*01:01/DQB1*05:01 | 100%      | Dengue virus 3 | ELISPOT | IFNg release | Positive | 1 | 1 | 1 | 1 | 1 | 0 | 0 | 0 |
| 869489 | VKPIDDRFANALLAL      | NS5  | 3157 | 3171 | HLA-DPB1*01:01            | 100%      | Dengue virus 3 | ELISPOT | IFNg release | Positive | 1 | 1 | 1 | 1 | 1 | 0 | 0 | 0 |
| 869705 | WYMWLGARYLEFEAL      | NS5  | 2964 | 2978 | HLA-DQA1*05:01/DQB1*02:01 | 100%      | Dengue virus 3 | ELISPOT | IFNg release | Positive | 1 | 1 | 1 | 1 | 1 | 0 | 0 | 0 |
| 195123 | AGVFFTFVLLLSGQJ      | NS2a | 1159 | 1173 | HLA-DRB1*07:01            | >0% - 50% | Dengue virus 3 | ELISPOT | IFNg release | Positive | 1 | 0 | 0 | 0 | 0 | 0 | 0 | 0 |
| 195457 | HMIAGVFFTFVLLLS      | NS2a | 1156 | 1170 | HLA-DRB1*11:01            | >0% - 50% | Dengue virus 3 | ELISPOT | IFNg release | Positive | 1 | 0 | 0 | 0 | 0 | 0 | 0 | 0 |
| 867116 | IAGVFFTFVLLLSGQ      | NS2a | 1158 | 1172 | HLA-DPB1*01:01            | >0% - 50% | Dengue virus 3 | ELISPOT | IFNg release | Positive | 1 | 0 | 0 | 0 | 0 | 0 | 0 | 0 |



The image displays a large grid of colored squares, representing a data visualization, likely a heatmap or a map of a city grid. The grid is composed of many small squares, each colored in one of five colors: red, green, yellow, orange, or grey. The colors are distributed across the grid in a pattern that suggests a spatial or temporal distribution of data. The red squares are concentrated in the top-left corner, while the green squares are concentrated in the top-right corner. The yellow and orange squares are scattered throughout the grid, and the grey squares are concentrated in the bottom-right corner. The overall pattern of the grid suggests a complex, non-linear relationship between the data points.











CD8 DENV-3 Epitopes

| Epitope_ID | AA_Seq          | Protein_Name | Start | End  | Allele      | step | Serotype       | Method/Technique | Assay Group  | Qualitative Measure | g strains from Mexico, (100% |            | DENV-3 constructs of vaccines |      |      |           |        |      |
|------------|-----------------|--------------|-------|------|-------------|------|----------------|------------------|--------------|---------------------|------------------------------|------------|-------------------------------|------|------|-----------|--------|------|
|            |                 |              |       |      |             |      |                |                  |              |                     | ACQ44481.1                   | ACQ44480.1 | TV003                         | TDEN | DPIV | Dengvaxia | DENVax | TVDV |
| 180390     | CLMMMLPATL      | C            | 104   | 113  | HLA-A*02:01 | 0%   | Dengue virus 3 | ELISPOT          | IFNg release | Positive            | 0                            | 0          | 1                             | 1    | 1    | 0         | 0      | 0    |
| 180609     | LMMMMLPATL      | C            | 105   | 113  | HLA-A*02:01 | 0%   | Dengue virus 3 | ELISPOT          | IFNg release | Positive            | 0                            | 0          | 1                             | 1    | 1    | 0         | 0      | 0    |
| 184264     | LAKRFSRGL       | C            | 29    | 37   | HLA-B*08:01 | 0%   | Dengue virus 3 | ELISPOT          | IFNg release | Positive            | 0                            | 0          | 1                             | 1    | 1    | 0         | 0      | 0    |
| 184265     | LAKRFSRGLL      | C            | 29    | 38   | HLA-B*08:01 | 0%   | Dengue virus 3 | ELISPOT          | IFNg release | Positive            | 0                            | 0          | 1                             | 1    | 1    | 0         | 0      | 0    |
| 185260     | QAKRFSRG        | C            | 28    | 36   | HLA-B*08:01 | 0%   | Dengue virus 3 | ELISPOT          | IFNg release | Positive            | 0                            | 0          | 1                             | 1    | 1    | 0         | 0      | 0    |
| 183793     | IMKIGIGVLL      | E            | 452   | 461  | HLA-B*08:01 | 0%   | Dengue virus 3 | ELISPOT          | IFNg release | Positive            | 0                            | 0          | 1                             | 1    | 1    | 1         | 0      | 1    |
| 183843     | IQNSGGTSIF      | E            | 131   | 140  | HLA-B*15:01 | 0%   | Dengue virus 3 | ELISPOT          | IFNg release | Positive            | 0                            | 0          | 0                             | 1    | 0    | 1         | 0      | 0    |
| 184412     | LKGMSYAMCL      | E            | 156   | 165  | HLA-B*08:01 | 0%   | Dengue virus 3 | ELISPOT          | IFNg release | Positive            | 0                            | 0          | 1                             | 1    | 1    | 1         | 1      | 1    |
| 184965     | MVHQIFGSAY      | E            | 713   | 722  | HLA-B*15:01 | 0%   | Dengue virus 3 | ELISPOT          | IFNg release | Positive            | 0                            | 0          | 1                             | 1    | 1    | 1         | 1      | 1    |
| 186470     | WIMKIGIGVL      | E            | 451   | 460  | HLA-B*08:01 | 0%   | Dengue virus 3 | ELISPOT          | IFNg release | Positive            | 0                            | 0          | 1                             | 1    | 1    | 1         | 0      | 1    |
| 185464     | RPINEKEENM      | NS1          | 1109  | 1118 | HLA-B*35:01 | 0%   | Dengue virus 3 | ELISPOT          | IFNg release | Positive            | 0                            | 0          | 1                             | 1    | 1    | 0         | 0      | 0    |
| 183395     | GKKHMIAGVL      | NS2a         | 1153  | 1162 | HLA-B*08:01 | 0%   | Dengue virus 3 | ELISPOT          | IFNg release | Positive            | 0                            | 0          | 1                             | 0    | 1    | 0         | 0      | 0    |
| 3124       | AMKGLPIRY       | NS3          | 1708  | 1716 | HLA-B62     | 0%   | Dengue virus 3 | 51 chromium      | cytotoxicity | Positive            | 0                            | 0          | 0                             | 0    | 0    | 0         | 0      | 0    |
| 590435     | TRVVAEMEAMKGLPI | NS3          | 1698  | 1714 | HLA class I | 0%   | Dengue virus 3 | ICS              | IFNg release | Positive-Low        | 0                            | 0          | 0                             | 0    | 0    | 0         | 0      | 0    |
| 180788     | TKRDLGMSK       | NS4b         | 2250  | 2259 | HLA-A*11:01 | 0%   | Dengue virus 3 | ELISPOT          | IFNg release | Positive            | 0                            | 0          | 1                             | 1    | 1    | 0         | 0      | 0    |
| 69612      | VLLLVTHYA       | NS4b         | 2353  | 2361 | HLA-A2      | 0%   | Dengue virus 3 | ICS              | IFNg release | Positive            | 0                            | 0          | 1                             | 0    | 1    | 0         | 0      | 0    |
| 180650     | MEITAEWLW       | NS5          | 2863  | 2871 | HLA-B*58:01 | 0%   | Dengue virus 3 | ELISPOT          | IFNg release | Positive            | 0                            | 0          | 1                             | 1    | 1    | 0         | 0      | 0    |
| 180728     | RPRCLTREEF      | NS5          | 2879  | 2888 | HLA-B*07:02 | 0%   | Dengue virus 3 | ELISPOT          | IFNg release | Positive            | 0                            | 0          | 1                             | 1    | 1    | 0         | 0      | 0    |
| 186127     | TTWEDVPYL       | NS5          | 3321  | 3329 | HLA-A*02:01 | 0%   | Dengue virus 3 | ELISPOT          | IFNg release | Positive            | 0                            | 0          | 0                             | 1    | 0    | 0         | 0      | 0    |
| 32944      | KPWDVWPTV       | NS5          | 2819  | 2827 | HLA class I | 0%   | Dengue virus 3 | 51 chromium      | cytotoxicity | Positive            | 0                            | 0          | 0                             | 0    | 0    | 0         | 0      | 0    |
| 180577     | KSGAIKVLK       | C            | 74    | 82   | HLA-A*11:01 | 100% | Dengue virus 3 | ELISPOT          | IFNg release | Positive            | 1                            | 1          | 0                             | 1    | 0    | 0         | 0      | 0    |
| 184260     | LAIPPTAGVL      | C            | 57    | 66   | HLA-B*08:01 | 100% | Dengue virus 3 | ELISPOT          | IFNg release | Positive            | 1                            | 1          | 1                             | 1    | 1    | 0         | 0      | 0    |
| 184845     | MLKRVNRNV       | C            | 15    | 23   | HLA-B*08:01 | 100% | Dengue virus 3 | ELISPOT          | IFNg release | Positive            | 1                            | 1          | 1                             | 1    | 1    | 0         | 0      | 0    |
| 180464     | FTILALFLAH      | PreM         | 247   | 256  | HLA-B*35:01 | 100% | Dengue virus 3 | ELISPOT          | IFNg release | Positive            | 1                            | 1          | 1                             | 1    | 1    | 1         | 1      | 1    |
| 180504     | HPGFTILALF      | PreM         | 244   | 253  | HLA-B*35:01 | 100% | Dengue virus 3 | ELISPOT          | IFNg release | Positive            | 1                            | 1          | 1                             | 1    | 1    | 1         | 1      | 1    |
| 184658     | LTQKVVFIL       | PreM         | 262   | 271  | HLA-B*08:01 | 100% | Dengue virus 3 | ELISPOT          | IFNg release | Positive            | 1                            | 1          | 1                             | 1    | 1    | 1         | 1      | 1    |
| 185685     | SLFKTAGSG       | PreM         | 136   | 144  | HLA-B*08:01 | 100% | Dengue virus 3 | ELISPOT          | IFNg release | Positive            | 1                            | 1          | 1                             | 1    | 1    | 1         | 1      | 1    |
| 13119      | ELKGMYSYAM      | E            | 155   | 163  | HLA-B*08:01 | 100% | Dengue virus 3 | ELISPOT          | IFNg release | Positive            | 1                            | 1          | 1                             | 1    | 1    | 1         | 1      | 0    |
| 15796      | FFDLPLPWT       | E            | 211   | 219  | HLA-A2      | 100% | Dengue virus 3 | ICS              | IFNg release | Positive            | 1                            | 1          | 1                             | 1    | 1    | 1         | 1      | 1    |
| 180613     | LPEEQDQNY       | E            | 82    | 90   | HLA-B*35:01 | 100% | Dengue virus 3 | ELISPOT          | IFNg release | Positive            | 1                            | 1          | 0                             | 1    | 0    | 1         | 1      | 1    |
| 180657     | MLVTPSMTM       | E            | 273   | 281  | HLA-B*35:01 | 100% | Dengue virus 3 | ELISPOT          | IFNg release | Positive            | 1                            | 1          | 1                             | 0    | 1    | 0         | 0      | 0    |
| 184299     | LATRKLKCI       | E            | 53    | 61   | HLA-B*08:01 | 100% | Dengue virus 3 | ELISPOT          | IFNg release | Positive            | 1                            | 1          | 1                             | 1    | 1    | 1         | 1      | 1    |
| 184536     | LPEYGLGLE       | E            | 453   | 462  | HLA-B*35:01 | 100% | Dengue virus 3 | ELISPOT          | IFNg release | Positive            | 1                            | 1          | 1                             | 1    | 1    | 1         | 1      | 1    |
| 184568     | LPWTSGATT       | E            | 496   | 504  | HLA-B*35:01 | 100% | Dengue virus 3 | ELISPOT          | IFNg release | Positive            | 1                            | 1          | 1                             | 1    | 1    | 1         | 0      | 1    |
| 184924     | MSYAMCTNTF      | E            | 575   | 584  | HLA-B*35:01 | 100% | Dengue virus 3 | ELISPOT          | IFNg release | Positive            | 1                            | 1          | 0                             | 0    | 0    | 0         | 0      | 0    |
| 185419     | RLKMDKLEL       | E            | 148   | 156  | HLA-B*08:01 | 100% | Dengue virus 3 | ELISPOT          | IFNg release | Positive            | 1                            | 1          | 1                             | 1    | 1    | 1         | 1      | 0    |
| 186029     | TPTWNRKEL       | E            | 226   | 234  | HLA-B*07:02 | 100% | Dengue virus 3 | ELISPOT          | IFNg release | Positive-Low        | 1                            | 1          | 0                             | 1    | 0    | 1         | 1      | 1    |
| 589817     | SGATWVDVLEHGGCV | E            | 268   | 283  | HLA class I | 100% | Dengue virus 3 | ICS              | IFNg release | Positive-High       | 1                            | 1          | 1                             | 1    | 1    | 1         | 1      | 1    |
| 150537     | RPGVHTQTA       | NS1          | 1030  | 1038 | HLA-B*07:02 | 100% | Dengue virus 3 | ELISPOT          | IFNg release | Positive            | 1                            | 1          | 1                             | 1    | 1    | 0         | 0      | 0    |
| 150546     | RSCTLPPLRY      | NS1          | 1087  | 1096 | HLA-A*01:01 | 100% | Dengue virus 3 | ELISPOT          | IFNg release | Positive            | 1                            | 1          | 1                             | 1    | 1    | 0         | 0      | 0    |
| 180738     | RYMGEDGCWY      | NS1          | 1095  | 1104 | HLA-A*24:02 | 100% | Dengue virus 3 | ELISPOT          | IFNg release | Positive            | 1                            | 1          | 1                             | 1    | 1    | 0         | 0      | 0    |
| 182939     | EKEENMVKSL      | NS1          | 1113  | 1122 | HLA-B*08:01 | 100% | Dengue virus 3 | ELISPOT          | IFNg release | Positive            | 1                            | 1          | 1                             | 1    | 1    | 0         | 0      | 0    |
| 183723     | IKLTVVVDGI      | NS1          | 857   | 866  | HLA-B*08:01 | 100% | Dengue virus 3 | ELISPOT          | IFNg release | Positive            | 1                            | 1          | 1                             | 1    | 1    | 0         | 0      | 0    |
| 184585     | LRTTIVSGKL      | NS1          | 64    | 73   | HLA-B*08:01 | 100% | Dengue virus 3 | ELISPOT          | IFNg release | Positive            | 1                            | 1          | 1                             | 1    | 1    | 0         | 0      | 0    |
| 185573     | RYMGEDGCW       | NS1          | 1095  | 1103 | HLA-A*24:02 | 100% | Dengue virus 3 | ELISPOT          | IFNg release | Positive            | 1                            | 1          | 1                             | 1    | 1    | 0         | 0      | 0    |
| 185734     | SPKRLATAI       | NS1          | 811   | 819  | HLA-B*08:01 | 100% | Dengue virus 3 | ELISPOT          | IFNg release | Positive            | 1                            | 1          | 1                             | 1    | 1    | 0         | 0      | 0    |
| 184254     | LAILFEVVM       | NS2a         | 1140  | 1148 | HLA-B*35:01 | 100% | Dengue virus 3 | ELISPOT          | IFNg release | Positive            | 1                            | 1          | 1                             | 1    | 1    | 0         | 0      | 0    |
| 185978     | TMGVLCLAI       | NS2a         | 1134  | 1143 | HLA-B*08:01 | 100% | Dengue virus 3 | ELISPOT          | IFNg release | Positive            | 1                            | 1          | 1                             | 0    | 1    | 0         | 0      | 0    |
| 186175     | TWRDMAHTLI      | NS2a         | 1174  | 1183 | HLA-A*24:02 | 100% | Dengue virus 3 | ELISPOT          | IFNg release | Positive            | 1                            | 1          | 1                             | 1    | 1    | 0         | 0      | 0    |
| 180622     | LPWWLAHKVA      | NS3          | 226   | 235  | HLA-B*35:01 | 100% | Dengue virus 3 | ELISPOT          | IFNg release | Positive            | 1                            | 1          | 1                             | 1    | 1    | 0         | 0      | 0    |
| 182917     | EKDFDAAGR       | NS3          | 2083  | 2091 | HLA-A*33:01 | 100% | Dengue virus 3 | ELISPOT          | IFNg release | Positive            | 1                            | 1          | 1                             | 1    | 1    | 0         | 0      | 0    |
| 184065     | KLNDWDFV        | NS3          | 399   | 407  | HLA-A*02:01 | 100% | Dengue virus 3 | ELISPOT          | IFNg release | Positive-High       | 1                            | 1          | 1                             | 1    | 1    | 0         | 0      | 0    |
| 186234     | VEIWTKEGK       | NS3          | 2053  | 2062 | HLA-B*40:01 | 100% | Dengue virus 3 | ELISPOT          | IFNg release | Positive            | 1                            | 1          | 1                             | 1    | 1    | 0         | 0      | 0    |



|         |            |      |      |      |             |           |                |                     |               |          |   |   |   |   |   |   |   |   |
|---------|------------|------|------|------|-------------|-----------|----------------|---------------------|---------------|----------|---|---|---|---|---|---|---|---|
| 19434   | GESRKTFVE  | NS3  | 2001 | 2009 | HLA-B7      | 100%      | Dengue virus 3 | 51 chromium         | cytotoxicity  | Positive | 1 | 1 | 1 | 1 | 1 | 0 | 0 | 0 |
| 19435   | GESRKTFVEL | NS3  | 211  | 220  | HLA-B*40:01 | 100%      | Dengue virus 3 | ICS                 | IFNg release  | Positive | 1 | 1 | 1 | 1 | 1 | 0 | 0 | 0 |
| 22820   | GTSGSPINR  | NS3  | 133  | 142  | HLA-A*11:01 | 100%      | Dengue virus 3 | 51 chromium         | cytotoxicity  | Positive | 1 | 1 | 1 | 1 | 1 | 0 | 0 | 0 |
| 22821   | GTSGSPINRE | NS3  | 133  | 143  | HLA-A11     | 100%      | Dengue virus 3 | ICS                 | IFNg release  | Positive | 1 | 1 | 1 | 1 | 1 | 0 | 0 | 0 |
| 34605   | KYTDRKWCF  | NS3  | 240  | 248  | HLA-A24     | 100%      | Dengue virus 3 | ELISPOT             | IFNg release  | Positive | 1 | 1 | 1 | 1 | 1 | 0 | 0 | 0 |
| 62183   | SVKKDLISY  | NS3  | 71   | 79   | HLA-B62     | 100%      | Dengue virus 3 | 51 chromium         | cytotoxicity  | Positive | 1 | 1 | 1 | 1 | 1 | 0 | 0 | 0 |
| 183165  | FFMMVLLIPE | NS4a | 2205 | 2214 | HLA-A*33:01 | 100%      | Dengue virus 3 | ELISPOT             | IFNg release  | Positive | 1 | 1 | 1 | 1 | 1 | 0 | 0 | 0 |
| 37494   | LLGLMILL   | NS4a | 2148 | 2156 | HLA-A2      | 100%      | Dengue virus 3 | ICS                 | IFNg release  | Positive | 1 | 1 | 1 | 1 | 1 | 0 | 0 | 0 |
| 180381  | ATGPITTLW  | NS4b | 2439 | 2447 | HLA-B*58:01 | 100%      | Dengue virus 3 | ELISPOT             | IFNg release  | Positive | 1 | 1 | 1 | 1 | 1 | 0 | 0 | 0 |
| 183796  | IMKSVGTGK  | NS4b | 2481 | 2489 | HLA-A*03:01 | 100%      | Dengue virus 3 | ELISPOT             | IFNg release  | Positive | 1 | 1 | 1 | 1 | 1 | 0 | 0 | 0 |
| 37534   | LLLMRTSWA  | NS4b | 2423 | 2431 | HLA-A2      | 100%      | Dengue virus 3 | biological activity | proliferation | Positive | 1 | 1 | 1 | 1 | 1 | 0 | 0 | 0 |
| 1067501 | KPIDDRFAN  | NS5  | 3158 | 3166 | HLA-B*07:02 | 100%      | Dengue virus 3 | ELISPOT             | IFNg release  | Positive | 1 | 1 | 1 | 1 | 1 | 0 | 0 | 0 |
| 180572  | KPRLCTREEF | NS5  | 2879 | 2888 | HLA-B*07:02 | 100%      | Dengue virus 3 | ELISPOT             | IFNg release  | Positive | 1 | 1 | 0 | 0 | 0 | 0 | 0 | 0 |
| 180678  | MVSRLLLNR  | NS5  | 2723 | 2731 | HLA-A*11:01 | 100%      | Dengue virus 3 | ELISPOT             | IFNg release  | Positive | 1 | 1 | 1 | 1 | 1 | 0 | 0 | 0 |
| 180737  | RYLEFEALGF | NS5  | 2971 | 2980 | HLA-A*24:02 | 100%      | Dengue virus 3 | ELISPOT             | IFNg release  | Positive | 1 | 1 | 1 | 1 | 1 | 0 | 0 | 0 |
| 180801  | VMGITAEWLW | NS5  | 2862 | 2871 | HLA-B*53:01 | 100%      | Dengue virus 3 | ELISPOT             | IFNg release  | Positive | 1 | 1 | 0 | 0 | 0 | 0 | 0 | 0 |
| 182553  | ALLALNDMGK | NS5  | 3167 | 3176 | HLA-A*03:01 | 100%      | Dengue virus 3 | ELISPOT             | IFNg release  | Positive | 1 | 1 | 1 | 1 | 1 | 0 | 0 | 0 |
| 185710  | SMINGVVKL  | NS5  | 318  | 326  | HLA-A*02:01 | 100%      | Dengue virus 3 | ELISPOT             | IFNg release  | Positive | 1 | 1 | 1 | 1 | 1 | 0 | 0 | 0 |
| 183587  | HMIAGVFTF  | NS2a | 368  | 377  | HLA-A*24:02 | >0% - 50% | Dengue virus 3 | ELISPOT             | IFNg release  | Positive | 1 | 0 | 0 | 0 | 0 | 0 | 0 | 0 |
| 184819  | MIAGVFTF   | NS2a | 369  | 377  | HLA-B*35:01 | >0% - 50% | Dengue virus 3 | ELISPOT             | IFNg release  | Positive | 1 | 0 | 0 | 0 | 0 | 0 | 0 | 0 |
| 186215  | VEDEDFWKL  | NS5  | 2915 | 2923 | HLA-B*40:01 | >0% - 50% | Dengue virus 3 | ELISPOT             | IFNg release  | Positive | 0 | 1 | 0 | 0 | 0 | 0 | 0 | 0 |
